# Supplementary material for: Public preferences for interventions to prevent emerging infectious disease threats: a discrete choice experiment
Source: PubMed Central journal article supplement — BMJ Open. 2018 Feb 16;8(2):e017355. doi: 10.1136/bmjopen-2017-017355 (PMC5857709; doi:10.1136/bmjopen-2017-017355), 2018-02-16
Supplement: bmjopen-2017-017355.draft_revisions.pdf [file bmjopen-2017-017355.draft_revisions.pdf]

# BMJ Open

BMJ Open is committed to open peer review. As part of this commitment we make the peer review history of every article we publish publicly available.

When an article is published we post the peer reviewers' comments and the authors' responses online. We also post the versions of the paper that were used during peer review. These are the versions that the peer review comments apply to.

The versions of the paper that follow are the versions that were submitted during the peer review process. They are not the versions of record or the final published versions. They should not be cited or distributed as the published version of this manuscript.

BMJ Open is an open access journal and the full, final, typeset and author-corrected version of record of the manuscript is available on our site with no access controls, subscription charges or pay-per-view fees (<http://bmjopen.bmj.com>).

If you have any questions on BMJ Open's open peer review process please email [editorial.bmjopen@bmj.com](mailto:editorial.bmjopen@bmj.com)

# BMJ Open

## Public preferences for interventions to prevent emerging infectious disease threats: a discrete choice experiment

|                                                                                                                                                                                                                             |                                                                                                                                                                                                                                                                                                                                                                                          |
|-----------------------------------------------------------------------------------------------------------------------------------------------------------------------------------------------------------------------------|------------------------------------------------------------------------------------------------------------------------------------------------------------------------------------------------------------------------------------------------------------------------------------------------------------------------------------------------------------------------------------------|
| Journal:                                                                                                                                                                                                                    | <i>BMJ Open</i>                                                                                                                                                                                                                                                                                                                                                                          |
| Manuscript ID                                                                                                                                                                                                               | bmjopen-2017-017355                                                                                                                                                                                                                                                                                                                                                                      |
| Article Type:                                                                                                                                                                                                               | Research                                                                                                                                                                                                                                                                                                                                                                                 |
| Date Submitted by the Author:                                                                                                                                                                                               | 19-Apr-2017                                                                                                                                                                                                                                                                                                                                                                              |
| Complete List of Authors:                                                                                                                                                                                                   | Cook, Alex; National University Singapore Singapore, Saw Swee Hock School of Public Health<br>Zhao, Xiahong; National University of Singapore, Saw Swee Hock School of Public Health<br>Chen, Mark I-Cheng; National University of Singapore, Saw Swee Hock School of Public Health<br>Finkelstein, Eric; Duke-NUS Graduate Medical School, Health Services and Systems Research Program |
| <b>Primary Subject Heading</b>:                                                                                                                                                                                             | Health policy                                                                                                                                                                                                                                                                                                                                                                            |
| Secondary Subject Heading:                                                                                                                                                                                                  | Health policy, Health economics, Infectious diseases, Public health                                                                                                                                                                                                                                                                                                                      |
| Keywords:                                                                                                                                                                                                                   | Public health < INFECTIOUS DISEASES, Discrete choice experiment, Emerging infectious diseases, Interventions                                                                                                                                                                                                                                                                             |
| <p>Note: The following files were submitted by the author for peer review, but cannot be converted to PDF. You must view these files (e.g. movies) online.</p> <p>Supplementary data 1.csv<br/>Supplementary data 2.csv</p> |                                                                                                                                                                                                                                                                                                                                                                                          |

SCHOLARONE™  
Manuscripts

1  
2  
3  
4  
5  
6  
7  
8  
9  
10  
11  
12  
13  
14  
15  
16  
17  
18  
19  
20  
21  
22  
23  
24  
25  
26  
27  
28  
29  
30  
31  
32  
33  
34  
35  
36  
37  
38  
39  
40  
41  
42  
43  
44  
45  
46  
47  
48  
49  
50  
51  
52  
53  
54  
55  
56  
57  
58  
59  
60

## Public preferences for interventions to prevent emerging infectious disease threats: a discrete choice experiment

Running title: Preferences for outbreak interventions

### Authors (family names underlined):

Alex R Cook\*, PhD<sup>1,2,3,4</sup>, Xiahong Zhao, BSc<sup>1</sup>, Mark IC Chen MBBS, MPH, PhD<sup>1,3</sup>, Eric A Finkelstein, PhD, MHA<sup>1,2</sup>

<sup>1</sup>Saw Swee Hock School of Public Health, National University of Singapore and National University Health System, Singapore, Singapore

<sup>2</sup>Program in Health Services and Systems Research, Duke-NUS Graduate Medical School Singapore, Singapore, Singapore

<sup>3</sup>Communicable Disease Centre, Tan Tock Seng Hospital, Singapore, Singapore

<sup>4</sup>Department of Statistics and Applied Probability, National University of Singapore, Singapore, Singapore

### Author for correspondence:

Dr Alex R Cook; alex.richard.cook@gmail.com; +65 83 69 60 91

Saw Swee Hock School of Public Health, National University of Singapore, MD1, 12 Science Drive 2, Singapore 117549

Alternative if Cook unavailable: Prof Eric Finkelstein; eric.finkelstein@duke-nus.edu.sg

### Key Words

Public health, discrete choice experiment, emerging infectious diseases, interventions

## Abstract

**Objective** When faced with an emergent epidemic with high mortality and morbidity potential, policy makers must decide what public health interventions to deploy at different stages of the outbreak. However, almost nothing is known about how the public view these interventions or how they trade off risks (of disease) with inconvenience (of interventions). In this paper, we aim to understand public perceptions on pandemic interventions, as well as to identify if there are any distinct respondent preference classes.

**Design** A discrete choice experiment.

**Setting** This study was fielded in Singapore between November 2012 and February 2013.

**Participants** A random sample of 500 Singapore residents aged 21 and over, including 271 women and 229 men, was analysed.

**Outcome measures** Demographic information was collected from each participant. Participants were also shown a series of pairs of alternatives, each combining interventions and morbidity, mortality and cost outcomes, and declared a preference for one combination. A random utility model was developed to determine the individual's preference for interventions and a hierarchical cluster analysis was performed to identify distinct respondent preference classes.

**Results** On average, participants preferred more intense interventions and disfavoured death and tax. The number of infections did not significantly influence respondents' responses. We identified two broad classes of respondents: those who were mortality averse and those who were expenditure averse. Education was found to be a predictor of group membership.

**Conclusion** Overall, there was considerable support for government interventions to prevent or mitigate outbreaks of emerging infectious diseases, including those that greatly restricted individual liberties, as long as the restrictions showed a reasonable chance of reducing the adverse health effects of the outbreak.

(271 words)

## Strengths and limitations of this study

- This study conducts discrete choice experiments that allow strength of preferences for different pandemic preparedness interventions among the general public to be estimated.
- A hierarchical cluster analysis identifies key population subgroups that perceive the public health response differently from the general population.
- The study design and statistical methods proposed in this study can be easily adapted to other settings.
- The public reaction is unpredictable, and it may depend on the severity and symptoms of the disease.

## Introduction

The last decade has witnessed the emergence of several emerging infectious diseases, including the first influenza pandemic of the 21st century<sup>1</sup>, avian influenza A(H7N9) outbreaks<sup>2-4</sup> a novel coronavirus (MERS-CoV) that emerged in Saudi Arabia<sup>5</sup> and spread around the Middle East and Western Pacific<sup>6,7</sup>, the Ebola crisis in Western Africa<sup>8</sup> and the Zika outbreak in the Americas and Asia<sup>9,10</sup>. When faced with such threats, policy makers worldwide have to decide which public health interventions to deploy should such an emerging infectious disease cause an outbreak in their territory. Following the emergence of the Severe Acute Respiratory Syndrome Coronavirus (SARS-CoV) in 2003<sup>11</sup>, and the ongoing transmission of avian influenza A(H5N1) in South East Asia<sup>12,13</sup> and China<sup>14</sup>, the WHO urged governments to develop pandemic preparedness plans<sup>15</sup> as it revised the International Health Regulations in 2005<sup>16</sup>. Details vary between countries<sup>17,18</sup>, and the influenza A(H1N1) pandemic of 2009 demonstrated clearly that willingness to respond also varied substantially between countries, with several Asian countries adopting more aggressive response policies<sup>19-21</sup> than the approach common in America and Europe, which could be described as being more proportionate to the threat.

In the aftermath of the 2009 influenza pandemic, particularly severe criticism was voiced from some European quarters that health authorities and the WHO over-reacted in their response to the influenza A(H1N1) pandemic of 2009<sup>22</sup>. Others argued that the prior experiences with SARS-CoV and H5N1 justified a robust response to the influenza A(H1N1pdm09) pandemic in 2009<sup>19,20</sup>. For instance, in Singapore, where SARS-CoV caused 238 infections, 33 deaths, and reduced annual GDP by 1%<sup>23</sup>, there was a strong governmental response, with over 8,000 contacts of SARS-CoV cases quarantined<sup>24</sup>. Singapore's health authorities used similarly robust measures during the influenza pandemic in 2009, and initially mandated isolation of confirmed cases, quarantining of exposed individuals, and temperature screening in hospitals, public places and ports of entry<sup>25</sup>. This was in spite of the paucity of evidence that such measures would make any difference to the overall course of the pandemic.

Since public acceptance is vital for many outbreak response policies to have the intended effect, public health decision making must go beyond accurate assessments of the severity of a threat and what measures might be effective against it. It has to calibrate policy to the public's willingness to accept the trade-offs associated with a given response to the outbreak, and a framework is needed for assessing this while recognizing the diversity of views between and within populations as to what they value. This framework must be able to accommodate a diversity of scenarios on the key characteristics of the threat, and the suite of public health interventions available. To this end, we conducted a 'conjoint'

1  
2  
3 discrete choice experiment to explore the Singapore public's willingness to accept certain containment  
4 and mitigation strategies under various outbreak scenarios, spanning a range of infection and fatality  
5 rates. Specifically we assess three broad questions: (i) How informed are the public about infectious  
6 disease outbreaks and the effectiveness of different interventions? (ii) How much do the public support  
7 interventions—quarantine, isolation of contacts, school closure and mass screening—that restrict civil  
8 liberties in an outbreak? (iii) How consistent are overall preferences for intervention policies throughout  
9 the population? Are there subgroups whose preferences are in opposition to the majority? We  
10 hypothesised that the population would be broadly supportive of interventions that restricted their civil  
11 liberties, but that they might be averse to monetary impacts of those interventions.  
12  
13  
14  
15  
16  
17  
18  
19

20 Our work was motivated by the past vulnerability of Singapore to a diversity of emerging infectious  
21 disease threats such as Nipah virus in the 1990s<sup>26</sup>, to SARS-CoV in 2003<sup>27</sup>, Chikungunya in 2008<sup>28</sup>,  
22 pandemic influenza A(H1N1pdm09) in 2009<sup>29</sup> and the Zika epidemic in 2016<sup>30</sup>, and its perceived  
23 vulnerability to future threats, given its location at the centre of South East Asia where various highly  
24 pathogenic strains of avian influenza continue to spread, its role as a transport hub, its highly urbanized  
25 environment and its tropical climate, which permits year round transmission of many viruses<sup>31</sup>. These  
26 results are hence intended to allow policy makers to identify policies which will have high levels of public  
27 support and are hence expected to translate into high levels of compliance, while exemplifying a  
28 method that can be used to address the same questions in different settings.  
29  
30  
31  
32  
33  
34  
35

## 36 **Methods**

### 37 **Fielding and sample**

38 This survey was fielded in Singapore between November 2012 and February 2013. The sampling frame  
39 was based on a list of households obtained from the Singapore national database of dwellings and  
40 continued until 500 responses with informed consent were obtained, which required 1,196 households  
41 to be contacted (yielding an unadjusted response rate of 41.8%). Respondent eligibility could not be  
42 determined in 41 households. The remaining households were found to have at least one eligible  
43 respondent (citizen or permanent resident aged 21 and over). For those with multiple eligible  
44 respondents, one was randomly selected to take the survey. Trained interviewers administered the  
45 paper survey in English, Malay, Mandarin or Tamil. The study was approved by the National University of  
46 Singapore Institutional Review Board. All methods were performed in accordance with relevant  
47 guidelines and regulations.  
48  
49  
50  
51  
52  
53  
54  
55  
56  
57  
58  
59  
60

## Survey structure

The survey questioned respondents' travel habits, experience with two previous infectious disease outbreaks in Singapore (the 2009 influenza A(H1N1pdm09) pandemic and the 2003 SARS-CoV outbreaks), attitudes towards and knowledge of the effectiveness of interventions, and beliefs about the burden of infectious diseases in Singapore. Participants were also asked how frequently they attended various crowded public places and whether they would reduce such attendance in response to an outbreak. Socio-demographic questions were also included.

The core of the survey was a discrete choice experiment (DCE), which is a method to identify preferences for, importance of, and willingness-to-pay (WTP) for various features of composite products or, as in this case, policy responses to an infectious disease outbreak. Each policy scenario consists of a number of attributes and each attribute of a number of levels. Each participant was provided a series of pairs of hypothetical alternatives, and asked to select one choice set of each pair as being his or her preference. Each pair of choice sets contains the same attributes but different levels of each attribute; the attributes and levels used are found in **Table 1**.

The first four attributes include interventions which were used in Singapore and other countries at various points of the 2009 influenza pandemic, 2003 SARS outbreak, and in response to other emerging outbreaks. The fifth assesses the tolerance to economic losses. The final two summarize the severity of the outbreak, in size (number of cases) and fatality rates. A typical pair of choice sets is provided in **Table 2**. Attributes and levels for the survey were determined through literature review, cognitive interviews, and piloting a draft instrument (n=50)<sup>32</sup>.

Following standard practice in DCEs<sup>32</sup>, respondents saw a fractional DCE design that is statistically efficient, minimizes level overlap (where levels do not vary across competing options) and ensures level balance (each level appears approximately the same number of times)<sup>33</sup>. The design was produced using Sawtooth SSI Web v8.22 and included four choice sets (versions), each version containing ten tasks.

Five of the seven attributes consisted of measures the government could take to restrict the spread of an infectious disease. The government, during the 2009 influenza pandemic and 2003 SARS-CoV outbreaks, quarantined suspected cases and enforced the isolation of actual cases. Both of these measures were included as attributes with two levels for each: mandatory and voluntary. The cancellation of mass gatherings was also included as an attribute with levels ranging from no



1  
2  
3  
4  
5  
6  
7  
8  
9  
10  
11  
12  
13  
14  
15  
16  
17  
18  
19  
20  
21  
22  
23  
24  
25  
26  
27  
28  
29  
30  
31  
32  
33  
34  
35  
36  
37  
38  
39  
40  
41  
42  
43  
44  
45  
46  
47  
48  
49  
50  
51  
52  
53  
54  
55  
56  
57  
58  
59  
60

cancellations to the closure of schools and prohibition of other types of mass gatherings. Temperature screening using thermal scanners was used during both the two events in Singapore and was therefore also included with different levels indicating whether the screenings were to be conducted only at border checkpoints, at checkpoints and other sites within Singapore, or not at all. Finally, a monetary attribute was included which posited a hypothetical one-time tax to fund control efforts with the following values: S\$15, S\$20, S\$40 and S\$50 (in 2013 S\$1  $\approx$  US\$0.80). The two remaining attributes described the outcome of an infectious disease outbreak in terms of two metrics: the expected number of infections (five levels ranging from 200 to 1,000,000 cases) and the expected number of infection-related deaths (five levels; 0 – 180 deaths). These levels were selected to span plausible ranges for emerging infectious disease outbreaks or pandemics. The DCE consisted of ten tasks that required respondents to choose between two scenarios with different levels of the seven attributes.

### Analyses

**Model overview:** The analysis uses a random utility model (RUM), which posits that respondents choose the option which provides them greater satisfaction/utility. By regressing respondent choices on the policy attributes and levels, we derived preference weights for each attribute-level, when all other attribute levels are held constant. The model assumes that the utility of a given scenario is a linear combination of the utilities associated with each attribute of the scenario, from interventions to outcomes, plus Gaussian noise. In addition, a hierarchical model was developed in which individuals were allowed differing utilities, the output of which was used to cluster individuals into groups.

**Model formulation:** A single attribute  $a$  has  $L_a$  levels. A choice set of options contains  $A$  attributes in all, and so the information about the choice set is contained in the object  $(l_1, l_2, \dots, l_A)$ . To facilitate analysis, the information is reformulated as a vector of dummy variables,  $(x_1, x_2, \dots, x_K)$  where  $K = \sum_{a=1}^A (L_a - 1)$  (1) is the total number of dummy variables, and where the dummy variables are coded 1 and 0 to indicate which levels are present for each attribute. One level per attribute is omitted to be treated as the baseline. We indicate choice sets via superscripts on the  $x$ s. The exception to this is the monetary variable which was left as a numerical value.

The average utility  $\mu_b$  over individuals in the population presented with a choice set of options  $b$  is modelled as a linear combination of utility components

$$\mu_b = \sum_{k=1}^K \beta_k x_k^b \quad (2)$$

1  
2  
3 where the  $\beta$ s capture the utility of each component. The utility experienced in the  $i$ th response is  
4 assumed to be  $u_{ib} \sim N(\mu_b, \sigma^2)$  (3). The respondent reports whether  $u_{i1} > u_{i2}$  or not. If we denote the  
5 difference between these utilities as  $\delta_i = u_{i1} - u_{i2}$  (4) then  $\delta_i \sim N(\mu_1 - \mu_2, 2\sigma^2)$  (5). We observe  $y_i$   
6 which is 1 if  $\delta_i > 0$  and 0 otherwise. The likelihood of the data therefore follows directly.  
7  
8  
9

10  
11 The WTP for a given change in a policy scenario is the amount of cash (in this case a one-time tax) that  
12 would leave a respondent indifferent between paying (or receiving payment) for the attribute levels in a  
13 new scenario or remain with the original scenario. The WTP can be estimated by comparing the change  
14 in utility between the scenarios and the marginal utility of the tax attribute. The utility of tax was  
15 assumed to be linear, creating a single utility to money mapping that permitted the posterior  
16 distribution of willingness-to-pay (in units of one Singapore dollar) to be derived by taking the ratio of  
17 the other  $\beta$ s to the tax  $\beta$ .  
18  
19  
20  
21  
22  
23

24 **Subgroup analysis:** We then employed a hierarchical cluster analysis with Wald's method to identify  
25 distinct respondent preference classes. To account for the between individual variation, a hierarchical  
26 model was fitted. This model is similar as the original model, but the utility parameter  $\beta$  varies by  
27 individual. The utility parameter,  $\beta_{ik}$ , for individual  $i$  attribute  $k$  was assigned a Normal prior, i.e.  
28  $\beta_{ik} \sim N(\mu_k, \sigma_k^2)$  (6). Following parameter estimation (see next section), the Euclidean distance matrix  
29 used for cluster analysis was calculated from posterior mean utilities associated with each attribute and  
30 each individual. The number of latent classes was determined using the dendrogram from the cluster  
31 analysis, centroid plot from a two-group linear discriminant analysis, and elbow plot. Demographic  
32 predictors of class membership were then determined through logistic regression.  
33  
34  
35  
36  
37  
38  
39

40 **Model fitting:** In the main model, flat prior distributions were assigned to each  $\beta_k$  and to  $\log \sigma$ . To  
41 ensure identifiability, one exception is made: the extreme level for one attribute (180 deaths) was set to  
42  $-1$  so that all other utilities are relative to that. The choice of the variable to anchor the utility scale to  
43 was made on pilot runs. In the hierarchical model used for clustering, the hyperprior distributions for  $\mu_k$   
44 and  $\sigma_k^2$  followed a normal distribution  $N(0, 10)$  and an inverse-gamma distribution with a shape of 0.1  
45 and a scale of 0.1, respectively. The model was fit using the Rstan package<sup>34</sup> that used the Stan language  
46  
47  
48  
49  
50  
51  
52  
53  
54  
55  
56  
57  
58  
59  
60

**Variant model:** An alternative model was also constructed in which the linear tax variable was

1  
2  
3 transformed using three dummy variables representing the tax effect of \$20, \$40 and \$50 compared  
4 with \$15. Similar results were obtained.  
5  
6

## 7 8 **Results**

### 9 10 **Survey respondents**

11 **Table 3** presents demographic characteristics for the 500 respondents and for a comparable population  
12 from the 2010 Singapore census. Although the age, gender, racial group, employment status and family  
13 status distributions are similar between the groups, the sample has a higher proportion of those  
14 educated to a polytechnic diploma level or higher (45.2% compared to 38.0% in census).  
15  
16

### 17 18 **Attitudes and knowledge**

19  
20 The fraction predicting there would be an infectious disease outbreak in Singapore infecting more than  
21 200 people over the next 12 months was 29% (95%CI 25%–33%, see **Figure 1**); the estimate for an  
22 outbreak infecting more than a million people (i.e. around a fifth of the total population) was much  
23 lower (10%, 95%CI 7%–12%). Mortality estimates also varied, with 20% (95%CI 16%–23%) predicting it  
24 likely that there would be an outbreak which kills more than 30, and 9% (95%CI 6%–11%) predicting one  
25 which kills more than 180 people, in the next year.  
26  
27

28  
29 When asked about each intervention in isolation, a large majority of respondents favoured a policy of  
30 quarantine for potentially infected contacts (83%, 95%CI 79%–86%, see **Figure 1**). Isolation for  
31 diagnosed cases of infection was favoured by an even larger proportion (95%, 95%CI 93%–97%). Most of  
32 the sample was also in favour of temperature screenings (though the proportion was higher for  
33 screenings conducted at the border than elsewhere: 95% [94%–98%] vs. 89% [87%–92%]). Temperature  
34 screening was thought to be somewhat or very effective by 91% (89–94%) and quarantine by 95% (94–  
35 97%).  
36  
37

38  
39 On attendance at crowded events or venues, the venue most frequently attended by survey participants  
40 were hawker centres (naturally ventilated food courts), where 29% (95%CI 25%–33%) went daily, and  
41 48% (95%CI 43%–52%) went weekly. A substantial fraction (60%, 95%CI 56%–64%) reported going to  
42 shopping malls at least weekly, as opposed to 28% (95%CI 24%–32%) who reported going to religious  
43 gatherings and 3% (95%CI 2%–5%) to festivals. When asked whether they would limit attendance at  
44 mass gatherings in the event of an infectious disease outbreak, a significant proportion reported they  
45  
46  
47  
48  
49  
50  
51  
52  
53  
54  
55  
56  
57  
58  
59  
60

1  
2  
3 would not: 58% (95%CI 50–67%) of those attending religious gatherings weekly and 51% (95%CI 43–  
4  
5 59%) of daily hawker centre patrons stated they would not reduce the frequency of attendance.  
6  
7

### 8 **Overall preferences for interventions and willingness to pay**

9 **Figure 3A** presents utilities for the entire sample excluding 7 with missing responses (full regression  
10 results are included in the **supplementary materials**). In outbreaks with at least 200 cases (the scenarios  
11 proffered), the sample as a whole marginally preferred mandatory to voluntary quarantine and  
12 isolation. They also favoured the cancellation of all mass gatherings and temperature screenings at sites  
13 all around Singapore. The two certainties of life—death and taxes—were disfavoured, but respondents'  
14 preferences were not influenced by the number of infections.  
15  
16  
17  
18  
19

20 **Table 4** shows how respondents valued, in monetary terms, different policy options or outcomes, based  
21 on their estimated WTP (parameter estimates [posterior means, 95% credible intervals] are presented in  
22 **Tables S1 and S2** for the models with and without linear terms for the tax attribute). In general,  
23 respondents preferred more intervention, rather than less, and were willing to accept a loss of S\$370  
24 million at the societal level for the full choice set of interventions considered for implementation.  
25 Participants indicated via their choices a willingness to accept (personal) costs of up to S\$34 (S\$19, S\$58)  
26 to prevent 30 deaths, S\$70 (S\$45, S\$112) to prevent 80, S\$71 (S\$49, S\$109) to prevent 120 and S\$98  
27 (S\$69, S\$148) to prevent 180—at a national level, these imply a willingness to pay ~ S\$0.5M to S\$1M for  
28 each life saved. The value placed on a strong response (mandatory isolation and quarantine, cancelling  
29 all mass gatherings, and islandwide screening), S\$74, thus approximately corresponded to the value  
30 placed on preventing 100 deaths.  
31  
32  
33  
34  
35  
36  
37  
38  
39

### 40 **Group preferences**

41 The hierarchical cluster analysis determined that the sample included two subgroups, and based on the  
42 following results we labelled these groups *mortality-averse* and *expenditure-averse* (estimates in **Tables**  
43 **S1 and S2**). Cluster analysis results for these groups are shown in **Figure 2**. The mortality-averse group  
44 (n=317, 63%) was in favour of the actual deployment of interventions, whereas the expenditure-averse  
45 group (n=183, 37%) expressed a strong disutility for a tax to cover the response and were ambivalent  
46 about mandatory isolation of confirmed cases. Both two groups, as expected, favoured a lower number  
47 of deaths, though the strength of preference varied substantially, with the mortality-averse group  
48 expressing a large disutility and the expenditure-averse a much smaller one. Neither group found  
49 reducing the number of infections important.  
50  
51  
52  
53  
54  
55  
56  
57  
58  
59  
60

### Predictors of class membership

Those with post-secondary school education were more likely to belong to the *mortality-averse* group than to belong to the *expenditure-averse* group (Odds ratio (OR): 1.85, 95% CI: 1.22 – 2.78). Other demographic variables were not predictive of class membership.

### Discussion

Public health policy makers have several constituencies, but chief among these is the populace on whose behalf they make decisions. Yet when it comes to pandemic preparedness, it is remarkable how little is known about what interventions the general population wants their governments to undertake. This gap is especially noteworthy due to the considerable personal burden imposed by some interventions and the backlash against what some deemed excessive measures during the 2009 influenza pandemic<sup>22,38</sup>.

Our survey found that most Singaporeans reported a high tolerance for interventions that curtail individual liberties, which may be related to their long-standing acceptance of a paternalistic streak in their government<sup>39</sup>. Most participants supported the isolation of known cases and the quarantine of potential cases, both strategies that have been used in recent history in Singapore: in 2003 thousands of contacts of SARS-CoV cases were isolated or put under daily telephone surveillance<sup>24</sup>, while in the early period of the 2009 epidemic, cases with confirmed influenza A(H1N1pdm09) infection and their household contacts were isolated at home, with foreigners detained in Government Quarantine Facilities<sup>40</sup>.

Overall, utilities of all participants were high for the more intense control measures, i.e. given the same number of infections and deaths, respondents reported preferring mandatory isolation, quarantine, and social distancing. It is not clear how effective social distancing measures would be in a mild outbreak, however, as many respondents reported that they would not voluntarily reduce how frequently they go out to eat or shop. It may be the implicit recognition of this that made the majority of participants recognize that isolation and quarantine should be mandatory rather than voluntary. Results reveal that the preferences of the population are not uniform; respondents could be broadly categorized into two groupings: one group (*mortality averse*) was strongly motivated to reduce the number of deaths and willing to accept interventions that did so, whereas another (*expenditure averse*, 37% of our respondents) was tax averse, and not in favour of any measures that might increase their taxes, even at levels comparable to the per capita costs of Singapore's routine dengue vector control program<sup>41</sup>.

1  
2  
3 Discrete-choice experiments can inform policy makers as to how much support there would be for  
4 potentially disruptive measures such as quarantine, isolation and school closures, and what kind of  
5 public health information might garner support from those otherwise not in favour. In Singapore, given  
6 our findings, this might involve stressing the necessity of such measures to reduce mortality, to co-opt  
7 the mortality-averse group, and to minimize the economic impact, to gain support from the sizeable tax-  
8 averse group. Studies such as this one can also identify misperceptions among the public that may  
9 hinder support for effective control. Two such examples surfaced in our study: (1) temperature  
10 screening island-wide received considerable support by our survey participants, although temperature  
11 screening at the country's main airport was estimated only to pick up around 1 imported case in 4 in  
12 2009<sup>25</sup>, and was increasingly ineffective as the infection became more widespread<sup>42</sup>, and (2) the  
13 predicted risk of infectious disease outbreaks was considerably underestimated: 2013 saw ~ 20 000  
14 dengue infections in Singapore, but the mean forecast risk of an outbreak infecting at least 200 people  
15 was a mere 29%. Future studies might evaluate the effect of priming respondents with accurate public  
16 health information before eliciting their preferences.  
17  
18  
19  
20  
21  
22  
23  
24  
25  
26  
27

28 Beyond its direct application to Singapore, our work holds a wider relevance on how governments and  
29 global health authorities can use such methods to inform better management of epidemics and  
30 pandemics. It has been argued that, during the influenza pandemic in 2009, the failure of WHO and  
31 government health agencies was not so much in their assessment of the severity of the threat or what  
32 interventions might be effective against it, but in being able to effectively communicate the risk and the  
33 benefits of select mitigation strategies<sup>43,44</sup>. Prior assessment of population level preferences could help  
34 identify thresholds of epidemic severity which could serve as triggers for the implementation of more  
35 disruptive measures. In addition, information from such surveys could be used to explain the rationale  
36 for particular decisions, with hierarchical cluster analysis used to support the targeting of different  
37 messages to audiences with different values. Whereas surveys have been performed retrospectively to  
38 gauge support for government responses to specific circumstances like the SARS-CoV outbreaks in 2003  
39 and influenza pandemic in 2009<sup>45,46</sup>, our method is the first conjoint analysis that quantifies public  
40 support for government interventions over a realistic range of outbreak scenarios and parameters.  
41  
42  
43  
44  
45  
46  
47  
48  
49  
50

51 Singapore is a city state in the centre of South East Asia that has experienced several emerging  
52 infectious disease threats and where some civil liberties are constrained for the good of society. Her  
53 people mostly originate in China, India and the Malay Archipelago, and, culturally and socially, Singapore  
54 has much in common with other countries in South, East, and South-East Asia. Our study may therefore  
55  
56  
57  
58  
59  
60

1  
2  
3 shed light on attitudes towards response to infectious disease threats in Asia, a hotspot for emerging  
4 infectious diseases <sup>47</sup>. Future research should extend the approach to African, American and European  
5 settings, where attitudes on the role the state should play in responding to public health threats may  
6 differ.  
7  
8  
9

10  
11 The current study does have limitations. The response rate was low (41.8%) and although there were no  
12 significant differences when compared to the population age, gender, race, employment or family data,  
13 those with higher education were over-represented in our sample. A further limitation is that the study  
14 design elicits the public's preferences and trade-offs between known interventions and known  
15 outcomes of those interventions. However, at an early stage of an outbreak of a novel pathogen, policy  
16 makers face grave uncertainty about the outcomes of interventions because the characteristics of the  
17 pathogen's transmission routes and potential, the severity and symptoms of the disease it causes, and  
18 the public reaction is unpredictable. As a result, the decisions policy makers must continue to be based  
19 on scientific advice and political imperatives. Surveys such as this one permit a better understanding of  
20 those political imperatives in emerging infectious disease outbreaks.  
21  
22  
23  
24  
25  
26  
27  
28  
29  
30  
31  
32  
33  
34  
35  
36  
37  
38  
39  
40  
41  
42  
43  
44  
45  
46  
47  
48  
49  
50  
51  
52  
53  
54  
55  
56  
57  
58  
59  
60

## References

1. Chowell, G. *et al.* Characterizing the Epidemiology of the 2009 Influenza A/H1N1 Pandemic in Mexico. *PLOS Med.* **8**, e1000436 (2011).
2. Uyeki, T. M. & Cox, N. J. Global Concerns Regarding Novel Influenza A (H7N9) Virus Infections. *N. Engl. J. Med.* **368**, 1862–1864 (2013).
3. Gao, R. *et al.* Human Infection with a Novel Avian-Origin Influenza A (H7N9) Virus. *N. Engl. J. Med.* **368**, 1888–1897 (2013).
4. Gao, H.-N. *et al.* Clinical Findings in 111 Cases of Influenza A (H7N9) Virus Infection. *N. Engl. J. Med.* **368**, 2277–2285 (2013).
5. Zaki, A. M., van Boheemen, S., Bestebroer, T. M., Osterhaus, A. D. M. E. & Fouchier, R. A. M. Isolation of a Novel Coronavirus from a Man with Pneumonia in Saudi Arabia. *N. Engl. J. Med.* **367**, 1814–1820 (2012).
6. Ki, M. 2015 MERS outbreak in Korea: hospital-to-hospital transmission. *Epidemiol. Health* **37**, (2015).
7. The WHO MERS-CoV Research Group. State of Knowledge and Data Gaps of Middle East Respiratory Syndrome Coronavirus (MERS-CoV) in Humans. *PLOS Curr. Outbreaks* (2013).  
doi:10.1371/currents.outbreaks.0bf719e352e7478f8ad85fa30127ddb8
8. WHO Ebola Response Team. Ebola Virus Disease in West Africa — The First 9 Months of the Epidemic and Forward Projections. *N. Engl. J. Med.* **371**, 1481–1495 (2014).
9. Musso, D., Nilles, E. J. & Cao-Lormeau, V.-M. Rapid spread of emerging Zika virus in the Pacific area. *Clin. Microbiol. Infect.* **20**, O595–O596 (2014).
10. Hennessey, M., Fischer, M. & Staples, J. E. Zika Virus Spreads to New Areas — Region of the Americas, May 2015–January 2016. *Am. J. Transplant.* **16**, 1031–1034 (2016).
11. Lipsitch, M. *et al.* Transmission Dynamics and Control of Severe Acute Respiratory Syndrome. *Science* **300**, 1966–1970 (2003).



- 1  
2  
3  
4  
5  
6  
7  
8  
9  
10  
11  
12  
13  
14  
15  
16  
17  
18  
19  
20  
21  
22  
23  
24  
25  
26  
27  
28  
29  
30  
31  
32  
33  
34  
35  
36  
37  
38  
39  
40  
41  
42  
43  
44  
45  
46  
47  
48  
49  
50  
51  
52  
53  
54  
55  
56  
57  
58  
59  
60
12. Aditama, T. Y. *et al.* Risk factors for cluster outbreaks of avian influenza A H5N1 infection, Indonesia. *Clin. Infect. Dis. Off. Publ. Infect. Dis. Soc. Am.* **53**, 1237–1244 (2011).
  13. Liem, N. T. *et al.* Clinical features of human influenza A (H5N1) infection in Vietnam: 2004-2006. *Clin. Infect. Dis. Off. Publ. Infect. Dis. Soc. Am.* **48**, 1639–1646 (2009).
  14. Smith, G. J. D. *et al.* Characterization of avian influenza viruses A (H5N1) from wild birds, Hong Kong, 2004-2008. *Emerg. Infect. Dis.* **15**, 402–407 (2009).
  15. WHO. *WHO global influenza preparedness plan: the role of WHO and recommendations for national measures before and during pandemics.* (World Health Organization, 2005).
  16. Rodier, G., Greenspan, A. L., Hughes, J. M. & Heymann, D. L. Global public health security. *Emerg. Infect. Dis.* **13**, 1447–1452 (2007).
  17. Coker, R. & Mounier-Jack, S. Pandemic influenza preparedness in the Asia-Pacific region. *Lancet* **368**, 886–889 (2006).
  18. Mounier-Jack, S. & Coker, R. J. How prepared is Europe for pandemic influenza? Analysis of national plans. *Lancet* **367**, 1405–1411 (2006).
  19. Leung, G. M. & Nicoll, A. Reflections on Pandemic (H1N1) 2009 and the International Response. *PLoS Med* **7**, e1000346 (2010).
  20. Fisher, D. *et al.* Pandemic response lessons from influenza H1N1 2009 in Asia. *Respirol. Carlton Vic* **16**, 876–882 (2011).
  21. Fineberg, H. V. Pandemic Preparedness and Response — Lessons from the H1N1 Influenza of 2009. *N. Engl. J. Med.* **370**, 1335–1342 (2014).
  22. O’Dowd, A. Council of Europe condemns ‘unjustified scare’ over swine flu. *BMJ* **340**, c3033–c3033 (2010).
  23. Keogh-Brown, M. R. & Smith, R. D. The economic impact of SARS: how does the reality match the predictions? *Health Policy Amst. Neth.* **88**, 110–120 (2008).

- 1  
2  
3 24. Tan, C.-C. SARS in Singapore--key lessons from an epidemic. *Ann. Acad. Med. Singapore* **35**, 345–349  
4  
5 (2006).  
6
- 7  
8 25. Tay, J., Ng, Y. F., Cutter, J. L. & James, L. Influenza A (H1N1-2009) pandemic in Singapore--public  
9  
10 health control measures implemented and lessons learnt. *Ann. Acad. Med. Singapore* **39**, 313–312  
11  
12 (2010).  
13
- 14  
15 26. Paton, N. I. *et al.* Outbreak of Nipah-virus infection among abattoir workers in Singapore. *Lancet*  
16  
17 **354**, 1253–1256 (1999).  
18
- 19  
20 27. Hsu, L.-Y. *et al.* Severe acute respiratory syndrome (SARS) in Singapore: clinical features of index  
21  
22 patient and initial contacts. *Emerg. Infect. Dis.* **9**, 713–717 (2003).  
23
- 24  
25 28. Ng, L.-C. *et al.* Entomologic and virologic investigation of Chikungunya, Singapore. *Emerg. Infect. Dis.*  
26  
27 **15**, 1243–1249 (2009).  
28
- 29  
30 29. Lee, V. J. *et al.* Comparability of different methods for estimating influenza infection rates over a  
31  
32 single epidemic wave. *Am. J. Epidemiol.* **174**, 468–478 (2011).  
33
- 34  
35 30. Fauci, A. S. & Morens, D. M. Zika Virus in the Americas — Yet Another Arbovirus Threat. *N. Engl. J.*  
36  
37 *Med.* **374**, 601–604 (2016).  
38
- 39  
40 31. Leo, Y.-S., Lye, D. C. & Chow, A. Influenza in the tropics. *Lancet Infect. Dis.* **9**, 457–458 (2009).  
41
- 42  
43 32. Bridges, J. F. P. *et al.* Conjoint analysis applications in health--a checklist: a report of the ISPOR Good  
44  
45 Research Practices for Conjoint Analysis Task Force. *Value Health J. Int. Soc. Pharmacoeconomics*  
46  
47 *Outcomes Res.* **14**, 403–413 (2011).  
48
- 49  
50 33. Zwerina, K., Huber, J. & Kuhfeld, W. F. *A General Method for Constructing Efficient Choice Designs.*  
51  
52 1–19 (SAS).  
53
- 54  
55 34. Stan Development Team. *RStan: the R interface to Stan.* (2016).  
56
- 57  
58 35. Stan Development Team. *Stan Modeling Language Users Guide and Reference Manual.* (2016).  
59  
60

- 1  
2  
3 36. Neal, R. in *Handbook of Markov Chain Monte Carlo* (Chapman and Hall/CRC, 2011).  
4  
5 doi:10.1201/b10905-6  
6  
7  
8 37. R Core Team. *R: A language and environment for statistical computing*. (R Foundation for Statistical  
9  
10 Computing, 2017).  
11  
12 38. Doshi, P. The elusive definition of pandemic influenza. *Bull. World Health Organ.* **89**, 532–538  
13  
14 (2011).  
15  
16  
17 39. Means, G. P. Soft Authoritarianism in Malaysia and Singapore. *J. Democr.* **7**, 103–117 (1996).  
18  
19  
20 40. Speed, T. Pondering Statistical Genomics, H1N1 Flu, and Quarantined Life in Singapore. *Amstat*  
21  
22 *News* **386**, 9–11 (2009).  
23  
24 41. Carrasco, L. R. *et al.* Economic Impact of Dengue Illness and the Cost-Effectiveness of Future  
25  
26 Vaccination Programs in Singapore. *PLoS Negl Trop Dis* **5**, e1426 (2011).  
27  
28  
29 42. Mukherjee, P. *et al.* Epidemiology of travel-associated pandemic (H1N1) 2009 infection in 116  
30  
31 patients, Singapore. *Emerg. Infect. Dis.* **16**, 21–26 (2010).  
32  
33  
34 43. Nicoll, A. & McKee, M. Moderate pandemic, not many dead—learning the right lessons in Europe  
35  
36 from the 2009 pandemic. *Eur. J. Public Health* **20**, 486–488 (2010).  
37  
38 44. Low, D. E. & McGeer, A. Pandemic (H1N1) 2009: assessing the response. *CMAJ Can. Med. Assoc. J. J.*  
39  
40 *Assoc. Medicale Can.* **182**, 1874–1878 (2010).  
41  
42  
43 45. Hilton, S. & Smith, E. Public views of the UK media and government reaction to the 2009 swine flu  
44  
45 pandemic. *BMC Public Health* **10**, 697 (2010).  
46  
47  
48 46. Leung, G. M. *et al.* A tale of two cities: community psychobehavioral surveillance and related impact  
49  
50 on outbreak control in Hong Kong and Singapore during the severe acute respiratory syndrome  
51  
52 epidemic. *Infect. Control Hosp. Epidemiol. Off. J. Soc. Hosp. Epidemiol. Am.* **25**, 1033–1041 (2004).  
53  
54  
55 47. Jones, K. E. *et al.* Global trends in emerging infectious diseases. *Nature* **451**, 990–993 (2008).  
56  
57  
58  
59  
60

## Author Contributions

Conceived the study: ARC, MICC, EAF. Oversaw data collection: MAF, EAF. Performed analyses: ARC, XZ, MAF. Wrote the paper: ARC, XZ, MAF, MICC, EAF.

## Additional Information

### Competing Interests

The authors declare no conflicts of interest.

### Funding

The work was funded by Singapore's National Medical Research Council, grant NMRC/H1N1R/005/2009, the Ministry of Health, Singapore, grant CDPHRG/0009/2014, and the Centre for Infectious Disease Epidemiology and Research. The funders had no role in study design, data collection and analysis, decision to publish, or preparation of the manuscript.

### Availability of data

All data analysed during this study are included in this published article (Supplementary data 1 and 2).

Figure captions

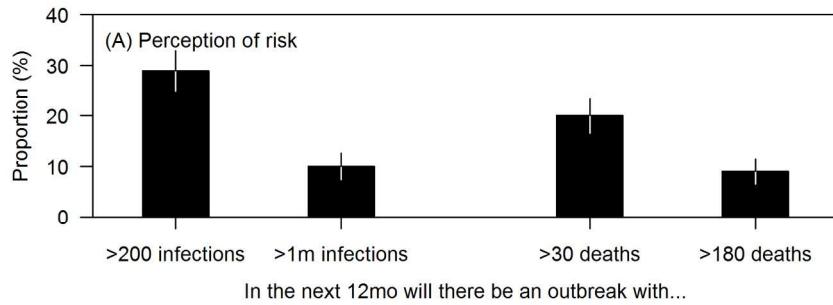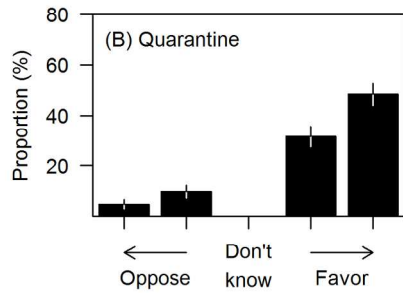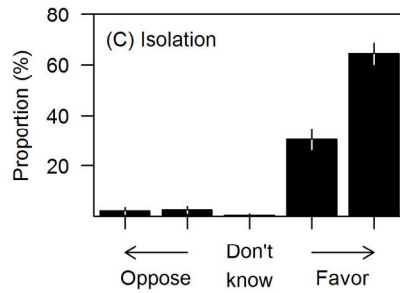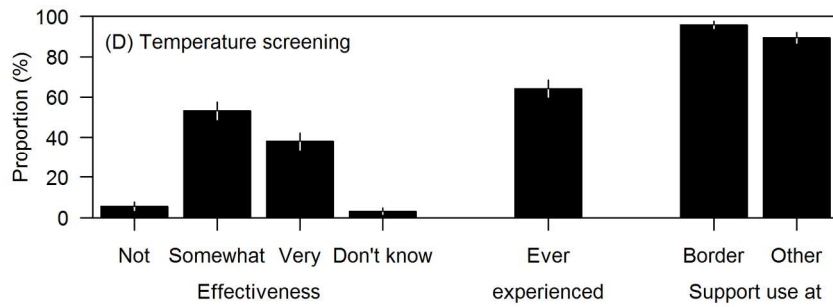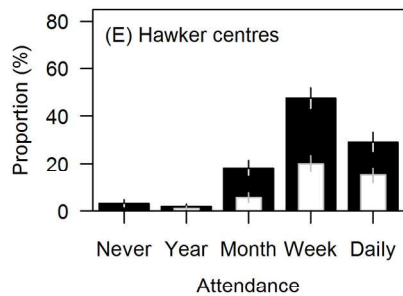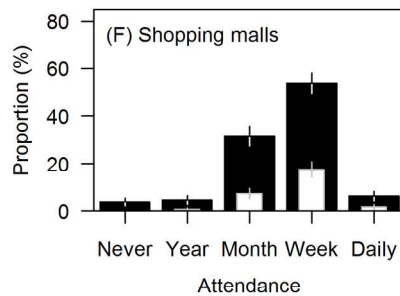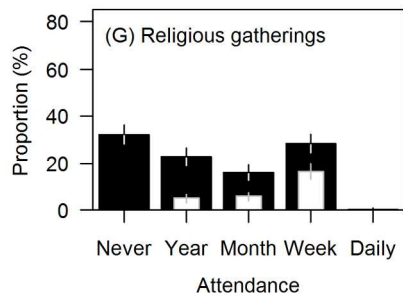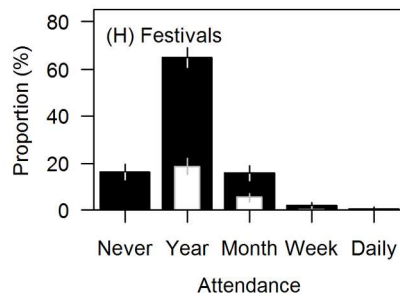

1  
2  
3 **Figure 1: Risk perceptions, support for interventions during infectious disease outbreaks and belief in**  
4 **their effectiveness among 500 adult Singapore residents.** Whiskers represent 95% confidence intervals.  
5

6  
7  
8 (A) Estimates of risk of large outbreaks over the next 12mo in Singapore. (B, C) Support for mandatory  
9 isolation and quarantine in the event of an outbreak. A four-point Likert scale (strongly oppose,  
10 moderately oppose, moderately in favour, strongly in favour) is presented with stronger opinions to the  
11 left- and right-most extremes of the plot. (D) Belief in the effectiveness of, experience of, and support  
12 for the use of temperature screening. (E–H) Frequency of attendance at hawker centers (outdoor food  
13 courts), shopping malls (black), religious gatherings and festivals. Week/Month/Year stand for at least  
14 once a week/month/year. Within each frequency, the number reporting they would *not* reduce their  
15 attendance in the event of an outbreak is overlaid (white), excepting those who never attend such  
16 activities.  
17  
18  
19  
20  
21  
22  
23  
24  
25  
26  
27  
28  
29  
30  
31  
32  
33  
34  
35  
36  
37  
38  
39  
40  
41  
42  
43  
44  
45  
46  
47  
48  
49  
50  
51  
52  
53  
54  
55  
56  
57  
58  
59  
60

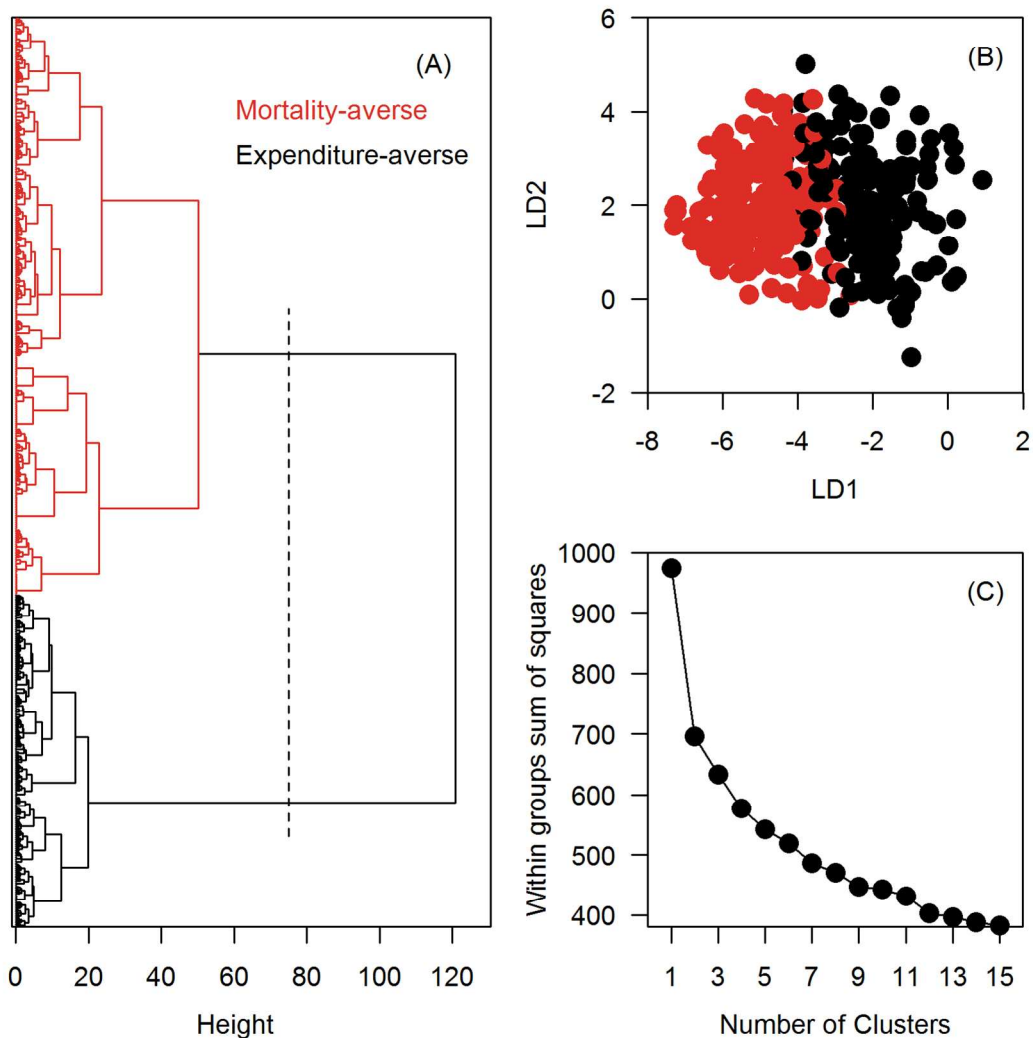

**Figure 2: Identification of distinct respondent preference classes among 500 adult Singapore residents using a hierarchical cluster analysis.** (A) A dendrogram of the hierarchical cluster analysis (Wald's method). The x-axis measures the closeness of either individual points or clusters. (B) A centroid plot shows the first (LD1, x-axis) versus the second discriminant function (LD2, y-axis) from a two-group linear discriminant analysis. (C) An elbow plot validates the number of clusters. The "elbow" on the line is at two clusters.

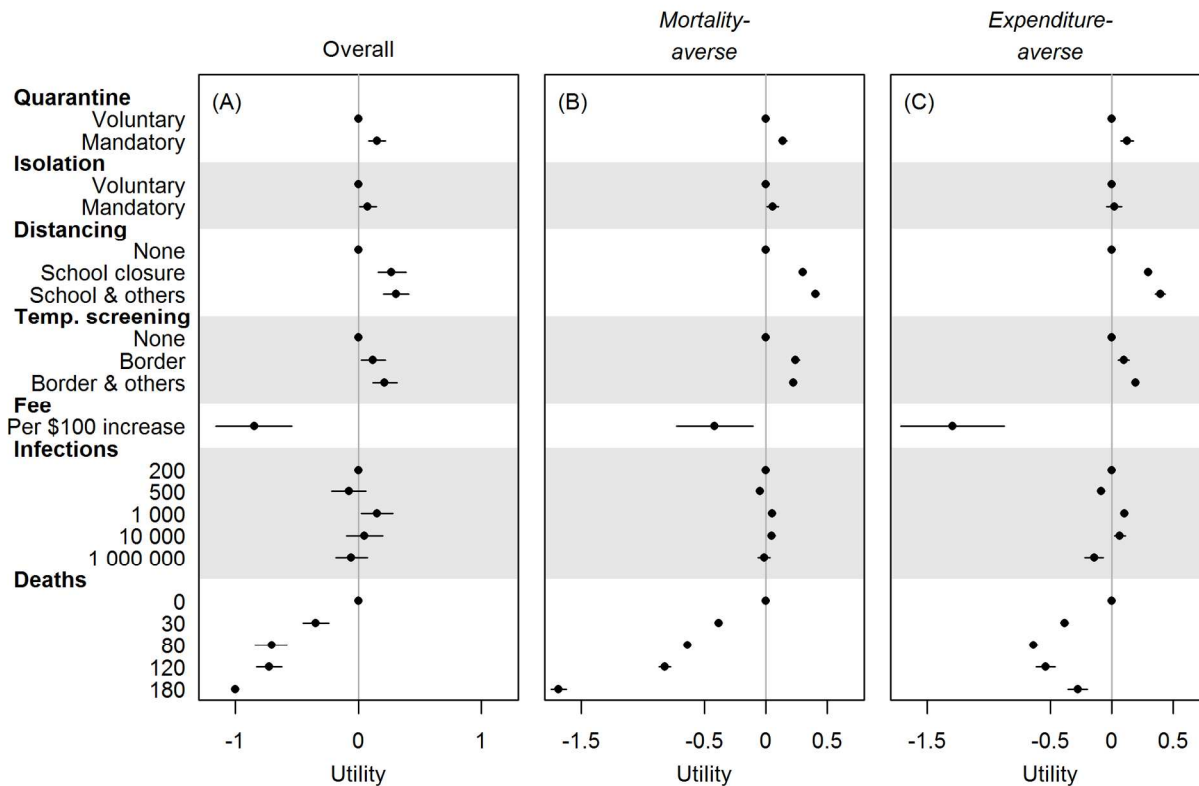

**Figure 3: Preference weights for policy scenario attributes, elicited by a discrete choice experiment.**

Overall (A) and in two subgroups (B, C) identified via hierarchical cluster analysis. Attribute levels with larger (positive) utilities are preferred to those with smaller (negative) utilities. The figure reflects estimated coefficients from the probit model, with the utilities for voluntary quarantine, voluntary isolation, no social distancing, no temperature screening, 200 infections and 0 deaths being set to 0. For panel (A), the utility for 180 deaths is set to  $-1$  for identifiability, all other utilities are therefore relative to it. Bars indicate 95% credible intervals. For panels (B, C), utilities are stratified posterior means from the Bayesian hierarchical model, and bars indicate 95% confidence intervals.



## Tables

Table 1: Attributes and levels used in the discrete choice experiment. Each choice set of options contained one level for each attribute.

| Attributes                                  | Levels                                                                                                                                                                                                                                            |
|---------------------------------------------|---------------------------------------------------------------------------------------------------------------------------------------------------------------------------------------------------------------------------------------------------|
| Quarantine of potential cases               | Voluntary / Mandatory                                                                                                                                                                                                                             |
| Isolation of actual cases                   | Voluntary / Mandatory                                                                                                                                                                                                                             |
| Cancellation of mass gatherings             | None / Closure of schools / Closure of schools and cancellation of other mass gatherings that involve more than 30 people in a single location                                                                                                    |
| Temperature screening                       | None / Only at border checkpoints / At border checkpoints and other sites within Singapore                                                                                                                                                        |
| One-time fee to fund public health measures | S\$15 / S\$20 / S\$40 / S\$50                                                                                                                                                                                                                     |
| Expected number of infections               | 200 cases (1 in 25,000 people are infected) /<br>500 cases (1 in 10,000 people are infected) /<br>1,000 cases (1 in 5,000 people are infected) /<br>10,000 cases (1 in 500 people are infected) /<br>1,000,000 cases (1 in 5 people are infected) |
| Expected number of infection-related deaths | 0 deaths / 30 deaths / 80 deaths / 120 deaths / 180 deaths                                                                                                                                                                                        |

Table 2: A typical pair of choice sets of options.

|                                                              | Scenario A                                     | Scenario B                                                                                                         |
|--------------------------------------------------------------|------------------------------------------------|--------------------------------------------------------------------------------------------------------------------|
| Policy measures                                              |                                                |                                                                                                                    |
| Quarantine of potential cases                                | Mandatory                                      | Voluntary                                                                                                          |
| Isolation of actual cases                                    | Voluntary                                      | Mandatory                                                                                                          |
| Cancellation of mass gatherings                              | Closure of schools                             | Closure of schools and cancellation of other mass gatherings that involve more than 30 people in a single location |
| Temperature screening                                        | Only at border checkpoints                     | Only at border checkpoints                                                                                         |
| One-time fee to fund public health measures                  | S\$40                                          | S\$15                                                                                                              |
| Outcomes                                                     |                                                |                                                                                                                    |
| Expected number of infections                                | 500 cases<br>(1 in 10,000 people are infected) | 1,000,000 cases<br>(1 in 5 people are infected)                                                                    |
| Expected number of infection-related deaths                  | 0 deaths                                       | 120 deaths                                                                                                         |
| Choice                                                       |                                                |                                                                                                                    |
| If these were your only two options, which would you choose? |                                                |                                                                                                                    |

Table 3: Demographic characteristics of sample (n=500) and population. Sample racial groups are self-declared. Census racial groups accord with national registration.

|                                 | Sample percentage (95% confidence interval) | Census 2010 percentage |
|---------------------------------|---------------------------------------------|------------------------|
| <b>Age</b>                      |                                             |                        |
| <40                             | 36.2 (32.0–40.4)                            | 39.9                   |
| 40–49                           | 26.4 (22.5–30.3)                            | 22.2                   |
| 50–59                           | 19.6 (16.1–23.1)                            | 19.3                   |
| 60+                             | 17.8 (14.4–21.2)                            | 18.6                   |
| <b>Gender</b>                   |                                             |                        |
| Male                            | 45.8 (41.4–50.2)                            | 48.8                   |
| Female                          | 54.2 (49.8–58.6)                            | 51.2                   |
| <b>Education</b>                |                                             |                        |
| Upper secondary school or lower | 54.8 (50.4–59.2)                            | 62.0                   |
| Polytechnic diploma or higher   | 45.2 (40.8–49.6)                            | 38.0                   |
| <b>Racial group</b>             |                                             |                        |
| Chinese                         | 72.8 (68.9–76.7)                            | 74.2                   |
| Indian                          | 9.6 (7.0–12.2)                              | 9.2                    |
| Malay                           | 13.0 (10.1–15.9)                            | 13.3                   |
| Other                           | 4.6 (2.8–6.4)                               | 3.3                    |
| <b>Employment status</b>        |                                             |                        |
| Employed                        | 65.0 (60.8–69.2)                            | 64.6                   |
| Unemployed                      | 3.2 (1.7–4.7)                               | 2.0                    |
| Not in labor force              | 31.8 (27.7–35.9)                            | 33.4                   |
| <b>Family status</b>            |                                             |                        |
| Without children                | 42.4 (38.1–46.7)                            | 44.0                   |
| With children                   | 57.6 (53.3–61.9)                            | 56.0                   |

Table 4: Willingness to pay to move between options. The willingness to pay figures indicate the cash amount (in Singapore dollars, at 2013 prices S\$1≈US\$0.80) required to make respondents indifferent between two neighbouring attribute levels, with arrows representing the direction in which the individual would be willing to pay to move. For instance, participants would pay \$13 (as revealed by their choices) to move from a voluntary to a mandatory quarantine policy.

| Attribute                       | Level          | WTP (95% CrI)               | Level          |
|---------------------------------|----------------|-----------------------------|----------------|
| Quarantine of potential cases   | Voluntary      | \$15 (\$8, \$24)<br>—————→  | Mandatory      |
|                                 | Mandatory      |                             |                |
| Isolation of actual cases       | Voluntary      | \$8 (\$1, \$16)<br>—————→   | Mandatory      |
|                                 | Mandatory      |                             |                |
| Cancellation of mass gatherings | None           | \$27 (\$14, \$48)<br>—————→ | School closure |
|                                 | School closure |                             |                |
| Temperature screening           | None           | \$12 (\$2, \$26)<br>—————→  | At border      |
|                                 | At border      |                             |                |
| Number of infections            | 200            | N.S.                        | 500            |
|                                 | 500            |                             |                |
| Number of deaths                | 200            | \$15 (\$4, \$29)<br>—————→  | 1 000          |
|                                 | 1 000          |                             | 10 000         |
|                                 | 10 000         | N.S.                        | 1 000 000      |
|                                 | 1 000 000      | N.S.                        |                |
| Number of deaths                | 0              | \$34 (\$19, \$58)<br>←————  | 30             |
|                                 | 30             |                             | 80             |
|                                 | 80             | \$70 (\$45, \$112)<br>←———— | 120            |
|                                 | 120            |                             | 180            |
| Number of deaths                | 0              | \$71 (\$49, \$109)<br>←———— | 180            |
|                                 | 180            |                             |                |
| Number of deaths                | 0              | \$98 (\$69, \$148)<br>←———— | 180            |
|                                 | 180            |                             |                |

N.S. Not significant as S\$0 included in the 95% credible interval.

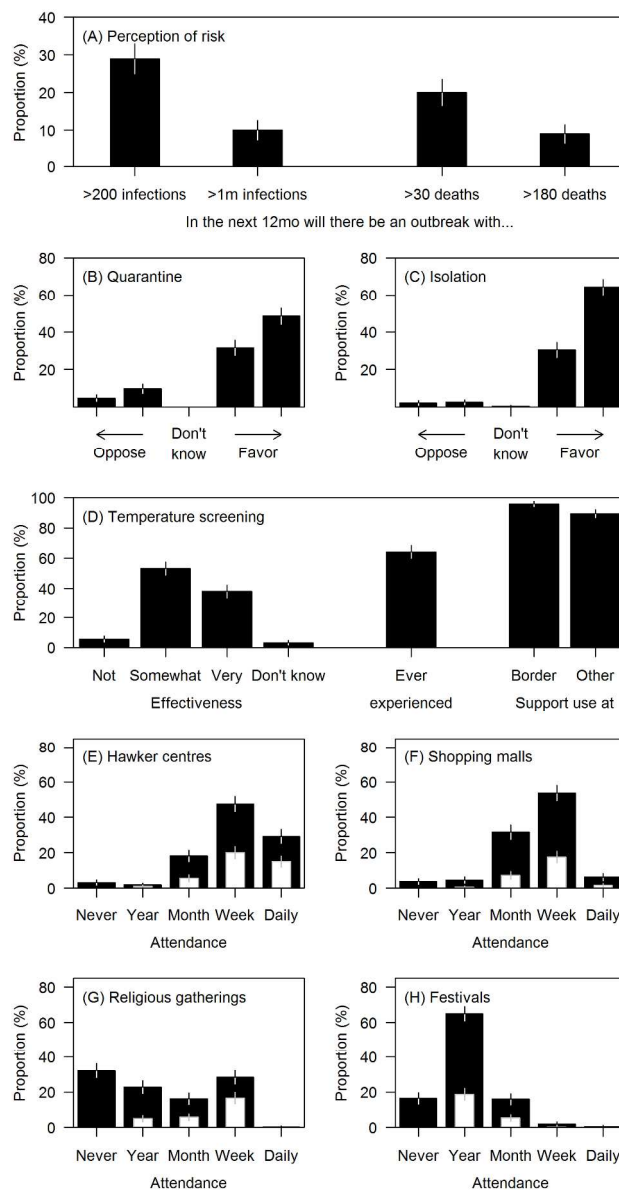

Figure 1: Risk perceptions, support for interventions during infectious disease outbreaks and belief in their effectiveness among 500 adult Singapore residents. Whiskers represent 95% confidence intervals. (A) Estimates of risk of large outbreaks over the next 12mo in Singapore. (B, C) Support for mandatory isolation and quarantine in the event of an outbreak. A four-point Likert scale (strongly oppose, moderately oppose, moderately in favour, strongly in favour) is presented with stronger opinions to the left- and right-most extremes of the plot. (D) Belief in the effectiveness of, experience of, and support for the use of temperature screening. (E–H) Frequency of attendance at hawker centers (outdoor food courts), shopping malls (black), religious gatherings and festivals. Week/Month/Year stand for at least once a week/month/year. Within each frequency, the number reporting they would not reduce their attendance in the event of an outbreak is overlaid (white), excepting those who never attend such activities.

1  
2  
3  
4  
5  
6  
7  
8  
9  
10  
11  
12  
13  
14  
15  
16  
17  
18  
19  
20  
21  
22  
23  
24  
25  
26  
27  
28  
29  
30  
31  
32  
33  
34  
35  
36  
37  
38  
39  
40  
41  
42  
43  
44  
45  
46  
47  
48  
49  
50  
51  
52  
53  
54  
55  
56  
57  
58  
59  
60

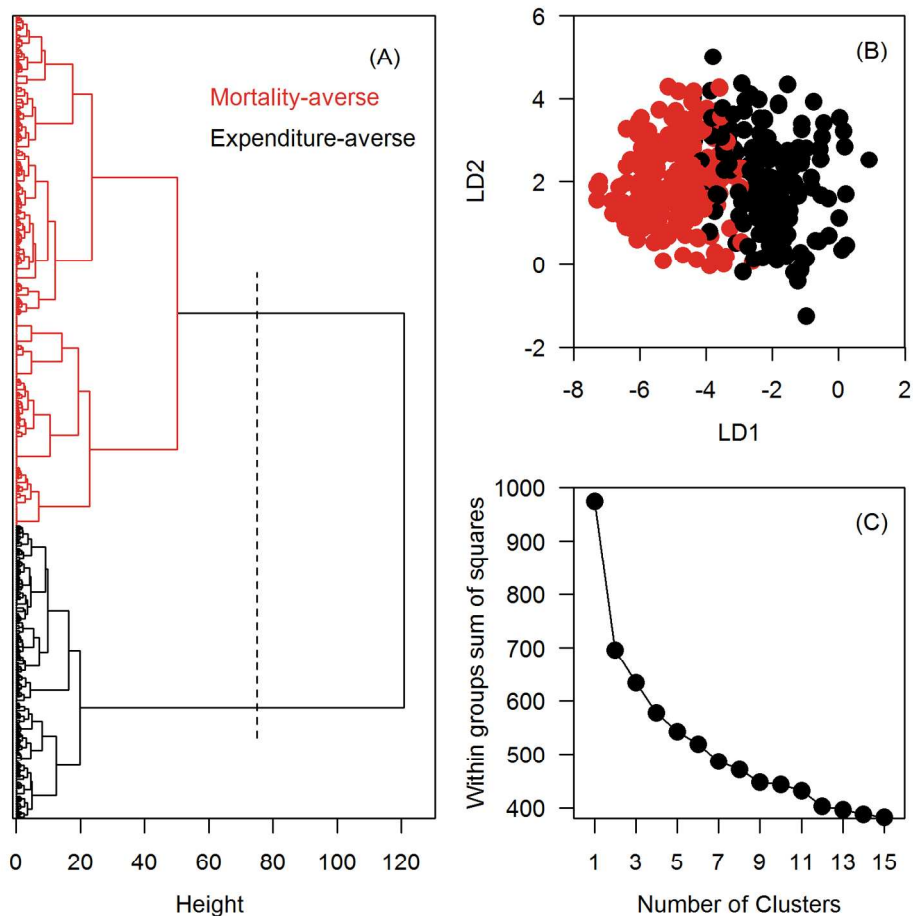

Figure 2: Identification of distinct respondent preference classes among 500 adult Singapore residents using a hierarchical cluster analysis. (A) A dendrogram of the hierarchical cluster analysis (Wald's method). The x-axis measures the closeness of either individual points or clusters. (B) A centroid plot shows the first (LD1, x-axis) versus the second discriminant function (LD2, y-axis) from a two-group linear discriminant analysis. (C) An elbow plot validates the number of clusters. The "elbow" on the line is at two clusters.

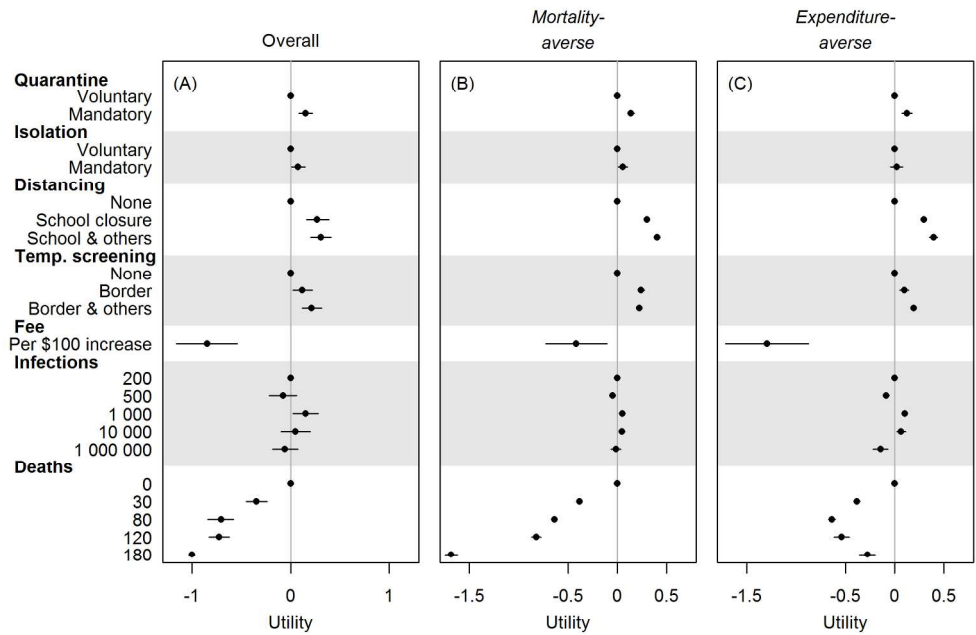

Figure 3: Preference weights for policy scenario attributes, elicited by a discrete choice experiment. Overall (A) and in two subgroups (B, C) identified via hierarchical cluster analysis. Attribute levels with larger (positive) utilities are preferred to those with smaller (negative) utilities. The figure reflects estimated coefficients from the probit model, with the utilities for voluntary quarantine, voluntary isolation, no social distancing, no temperature screening, 200 infections and 0 deaths being set to 0. For panel (A), the utility for 180 deaths is set to -1 for identifiability, all other utilities are therefore relative to it. Bars indicate 95% credible intervals. For panels (B, C), utilities are stratified posterior means from the Bayesian hierarchical model, and bars indicate 95% confidence intervals.

1  
2  
3 **Title: Public preferences for interventions to prevent emerging infectious disease threats: a discrete**  
4 **choice experiment - supplementary material**  
5  
6

7 **Authors (family names underlined):**

8  
9 Alex R Cook\*, PhD<sup>1,2,3,4</sup>, Xiahong Zhao, BSc<sup>1</sup>, Mark IC Chen MBBS, MPH, PhD<sup>1,3</sup>, Eric A Finkelstein, PhD,  
10 MHA<sup>1,2</sup>  
11

12  
13 <sup>1</sup>Saw Swee Hock School of Public Health, National University of Singapore and National University Health  
14 System, Singapore, Singapore

15  
16 <sup>2</sup>Program in Health Services and Systems Research, Duke-NUS Graduate Medical School Singapore,  
17 Singapore, Singapore

18  
19 <sup>3</sup>Communicable Disease Centre, Tan Tock Seng Hospital, Singapore, Singapore

20  
21 <sup>4</sup>Department of Statistics and Applied Probability, National University of Singapore, Singapore,  
22 Singapore  
23

24  
25 **Author for correspondence:**

26  
27 Dr Alex R Cook; alex.richard.cook@gmail.com; +65 83 69 60 91

28  
29 Saw Swee Hock School of Public Health, National University of Singapore, MD1, 12 Science Drive 2,  
30 Singapore 117549

31  
32 Alternative if Cook unavailable: Prof Eric Finkelstein; eric.finkelstein@duke-nus.edu.sg  
33  
34  
35  
36  
37  
38  
39  
40  
41  
42  
43  
44  
45  
46  
47  
48  
49  
50  
51  
52  
53  
54  
55  
56  
57  
58  
59  
60



**Table S1: Utility estimates under main model, all participants. 95% CrI is the 95% equal-tailed credible interval. The utility for all unlisted levels are set to 0. For the all-participant, the utility for 180 deaths is anchored to -1. For mortality-averse and expenditure-averse results, 95% CI is the 95% equal-tailed confidence interval for the posterior mean utility.**

| Attribute level                                          | Posterior mean | 95% CrI       | Attribute level      | Posterior mean | 95% CrI        |
|----------------------------------------------------------|----------------|---------------|----------------------|----------------|----------------|
| <b>All participants</b>                                  |                |               |                      |                |                |
| Mandatory quarantine                                     | 0.15           | (0.09,0.22)   | 500 infections       | -0.08          | (-0.22,0.06)   |
| Mandatory isolation                                      | 0.08           | (0.01,0.15)   | 1 000 infections     | 0.15           | (0.02,0.28)    |
| School closure                                           | 0.27           | (0.16,0.39)   | 10 000 infections    | 0.05           | (-0.10,0.20)   |
| School closure and cancellation of other mass gatherings | 0.31           | (0.21,0.41)   | 1 million infections | -0.06          | (-0.18,0.07)   |
| Screening at border                                      | 0.12           | (0.02,0.22)   | 30 deaths            | -0.35          | (-0.45,-0.24)  |
| Screening at border and other sites                      | 0.21           | (0.12,0.32)   | 80 deaths            | -0.71          | (-0.84,-0.58)  |
| Tax, per S\$100                                          | -0.84          | (-1.16,-0.54) | 120 deaths           | -0.72          | (-0.83,-0.62)  |
| Standard deviation                                       | 1.26           | (0.95,1.68)   | 180 deaths           | -1.00          | (-1.00,-1.00)  |
| <b>Mortality averse</b>                                  |                |               |                      |                |                |
| Attribute level                                          | Posterior mean | 95% CI        | Attribute level      | Posterior mean | 95% CI         |
| Mandatory quarantine                                     | 0.14           | (0.11, 0.17)  | 500 infections       | -0.04          | (-0.06, -0.03) |
| Mandatory isolation                                      | 0.06           | (0.01, 0.11)  | 1 000 infections     | 0.05           | (0.04, 0.07)   |
| School closure                                           | 0.30           | (0.29, 0.32)  | 10 000 infections    | 0.05           | (0.02, 0.08)   |
| School closure and cancellation of other mass gatherings | 0.41           | (0.38, 0.44)  | 1 million infections | -0.01          | (-0.06, 0.04)  |
| Screening at border                                      | 0.24           | (0.21, 0.27)  | 30 deaths            | -0.38          | (-0.40,-0.36)  |
| Screening at border and other sites                      | 0.22           | (0.21, 0.24)  | 80 deaths            | -0.64          | (-0.66,-0.61)  |
| Tax, per S\$100                                          | -0.41          | (-0.73,0.10)  | 120 deaths           | -0.82          | (-0.87,-0.77)  |
|                                                          |                |               | 180 deaths           | -1.68          | (-1.75,-1.62)  |
| <b>Expenditure averse</b>                                |                |               |                      |                |                |
| Mandatory quarantine                                     | 0.13           | (0.07, 0.18)  | 500 infections       | -0.08          | (-0.11, -0.06) |
| Mandatory isolation                                      | 0.02           | (-0.04,-0.09) | 1 000 infections     | 0.10           | (0.08, 0.13)   |
| School closure                                           | 0.30           | (0.27, 0.32)  | 10 000 infections    | 0.07           | (0.02, 0.11)   |
| School closure and cancellation of other mass gatherings | 0.40           | (0.35, 0.44)  | 1 million infections | -0.14          | (-0.22, -0.07) |
| Screening at border                                      | 0.10           | (0.06, 0.15)  | 30 deaths            | -0.38          | (-0.41, -0.35) |
| Screening at border and other sites                      | 0.19           | (0.17, 0.22)  | 80 deaths            | -0.64          | (-0.67, -0.60) |
| Tax, per S\$100                                          | -1.29          | (-1.72, 0.87) | 120 deaths           | -0.54          | (-0.62, -0.46) |
|                                                          |                |               | 180 deaths           | -0.28          | (-0.35, -0.20) |

Table S2: Utility estimates under variant model, all participants and subgroups. 95% CrI is the 95% equal-tailed credible interval. The utility for all unlisted levels are set to 0. For the all-participant, the utility for 180 deaths is anchored to -1.

| Attribute level                                          | Posterior mean | 95% CrI       | Attribute level      | Posterior mean | 95% CrI       |
|----------------------------------------------------------|----------------|---------------|----------------------|----------------|---------------|
| <b>All participants</b>                                  |                |               |                      |                |               |
| Mandatory quarantine                                     | 0.16           | (0.09,0.24)   | 500 infections       | -0.05          | (-0.19,0.10)  |
| Mandatory isolation                                      | 0.10           | (0.03,0.17)   | 1 000 infections     | 0.19           | (0.04,0.35)   |
| School closure                                           | 0.32           | (0.19,0.47)   | 10 000 infections    | 0.12           | (-0.05,0.33)  |
| School closure and cancellation of other mass gatherings | 0.29           | (0.18,0.41)   | 1 million infections | 0.02           | (-0.12,0.18)  |
| Screening at border                                      | 0.14           | (0.04,0.25)   | 30 deaths            | -0.38          | (-0.49,-0.26) |
| Screening at border and other sites                      | 0.18           | (0.07,0.29)   | 80 deaths            | -0.75          | (-0.92,-0.60) |
| S\$20 tax                                                | -0.22          | (-0.39,-0.08) | 120 deaths           | -0.76          | (-0.88,-0.65) |
| S\$30 tax                                                | -0.28          | (-0.39,-0.17) | 180 deaths           | -1.00          | (-1.00,-1.00) |
| S\$50 tax                                                | -0.34          | (-0.47,-0.21) | Standard deviation   | 1.38           | (1.00,1.93)   |

## CHEERS Checklist

## Items to include when reporting economic evaluations of health interventions

The ISPOR CHEERS Task Force Report, *Consolidated Health Economic Evaluation Reporting Standards (CHEERS)—Explanation and Elaboration: A Report of the ISPOR Health Economic Evaluations Publication Guidelines Good Reporting Practices Task Force*, provides examples and further discussion of the 24-item CHEERS Checklist and the CHEERS Statement. It may be accessed via the *Value in Health* or via the ISPOR Health Economic Evaluation Publication Guidelines – CHEERS: Good Reporting Practices webpage: <http://www.ispor.org/TaskForces/EconomicPubGuidelines.asp>

| Section/item                    | Item No | Recommendation                                                                                                                                                                             | Reported on page No/line No |
|---------------------------------|---------|--------------------------------------------------------------------------------------------------------------------------------------------------------------------------------------------|-----------------------------|
| <b>Title and abstract</b>       |         |                                                                                                                                                                                            |                             |
| Title                           | 1       | Identify the study as an economic evaluation or use more specific terms such as “cost-effectiveness analysis”, and describe the interventions compared.                                    | <u>page 1</u>               |
| Abstract                        | 2       | Provide a structured summary of objectives, perspective, setting, methods (including study design and inputs), results (including base case and uncertainty analyses), and conclusions.    | <u>page 2</u>               |
| <b>Introduction</b>             |         |                                                                                                                                                                                            |                             |
| Background and objectives       | 3       | Provide an explicit statement of the broader context for the study.<br>Present the study question and its relevance for health policy or practice decisions.                               | <u>page 4-5</u>             |
| <b>Methods</b>                  |         |                                                                                                                                                                                            |                             |
| Target population and subgroups | 4       | Describe characteristics of the base case population and subgroups analysed, including why they were chosen.                                                                               | <u>page 5</u>               |
| Setting and location            | 5       | State relevant aspects of the system(s) in which the decision(s) need(s) to be made.                                                                                                       | <u>page 5</u>               |
| Study perspective               | 6       | Describe the perspective of the study and relate this to the costs being evaluated.                                                                                                        | <u>page 6</u>               |
| Comparators                     | 7       | Describe the interventions or strategies being compared and state why they were chosen.                                                                                                    | <u>page 6-7</u>             |
| Time horizon                    | 8       | State the time horizon(s) over which costs and consequences are being evaluated and say why appropriate.                                                                                   | <u>page 5</u>               |
| Discount rate                   | 9       | Report the choice of discount rate(s) used for costs and outcomes and say why appropriate.                                                                                                 | <u>NA</u>                   |
| Choice of health outcomes       | 10      | Describe what outcomes were used as the measure(s) of benefit in the evaluation and their relevance for the type of analysis performed.                                                    | <u>page 6-7</u>             |
| Measurement of effectiveness    | 11a     | <i>Single study-based estimates:</i> Describe fully the design features of the single effectiveness study and why the single study was a sufficient source of clinical effectiveness data. | <u>NA</u>                   |

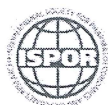

## Consolidated Health Economic Evaluation Reporting Standards – CHEERS Checklist 2

|    |                         |     |                                                                                                                                                                                                                                                                                                                                                       |                  |
|----|-------------------------|-----|-------------------------------------------------------------------------------------------------------------------------------------------------------------------------------------------------------------------------------------------------------------------------------------------------------------------------------------------------------|------------------|
| 1  |                         |     |                                                                                                                                                                                                                                                                                                                                                       |                  |
| 2  |                         |     |                                                                                                                                                                                                                                                                                                                                                       |                  |
| 3  |                         |     |                                                                                                                                                                                                                                                                                                                                                       |                  |
| 4  |                         |     |                                                                                                                                                                                                                                                                                                                                                       | <u>NA</u>        |
| 5  |                         |     |                                                                                                                                                                                                                                                                                                                                                       |                  |
| 6  |                         | 11b | <i>Synthesis-based estimates:</i> Describe fully the methods used for identification of included studies and synthesis of clinical effectiveness data.                                                                                                                                                                                                | <u>page 5-8</u>  |
| 7  |                         |     |                                                                                                                                                                                                                                                                                                                                                       |                  |
| 8  |                         |     |                                                                                                                                                                                                                                                                                                                                                       |                  |
| 9  | Measurement and         | 12  | If applicable, describe the population and methods used to elicit preferences for outcomes.                                                                                                                                                                                                                                                           | <u>NA</u>        |
| 10 | valuation of preference |     |                                                                                                                                                                                                                                                                                                                                                       |                  |
| 11 | based outcomes          |     |                                                                                                                                                                                                                                                                                                                                                       |                  |
| 12 | Estimating resources    | 13a | <i>Single study-based economic evaluation:</i> Describe approaches used to estimate resource use associated with the alternative interventions. Describe primary or secondary research methods for valuing each resource item in terms of its unit cost. Describe any adjustments made to approximate to opportunity costs.                           | <u>NA</u>        |
| 13 | and costs               |     |                                                                                                                                                                                                                                                                                                                                                       |                  |
| 14 |                         |     |                                                                                                                                                                                                                                                                                                                                                       |                  |
| 15 |                         |     |                                                                                                                                                                                                                                                                                                                                                       |                  |
| 16 |                         |     |                                                                                                                                                                                                                                                                                                                                                       |                  |
| 17 |                         |     |                                                                                                                                                                                                                                                                                                                                                       |                  |
| 18 |                         |     |                                                                                                                                                                                                                                                                                                                                                       |                  |
| 19 |                         | 13b | <i>Model-based economic evaluation:</i> Describe approaches and data sources used to estimate resource use associated with model health states. Describe primary or secondary research methods for valuing each resource item in terms of its unit cost. Describe any adjustments made to approximate to opportunity costs.                           | <u>page 7</u>    |
| 20 |                         |     |                                                                                                                                                                                                                                                                                                                                                       |                  |
| 21 |                         |     |                                                                                                                                                                                                                                                                                                                                                       |                  |
| 22 |                         |     |                                                                                                                                                                                                                                                                                                                                                       |                  |
| 23 |                         |     |                                                                                                                                                                                                                                                                                                                                                       |                  |
| 24 |                         |     |                                                                                                                                                                                                                                                                                                                                                       |                  |
| 25 |                         |     |                                                                                                                                                                                                                                                                                                                                                       |                  |
| 26 | Currency, price date,   | 14  | Report the dates of the estimated resource quantities and unit costs. Describe methods for adjusting estimated unit costs to the year of reported costs if necessary. Describe methods for converting costs into a common currency base and the exchange rate.                                                                                        | <u>page 7-9</u>  |
| 27 | and conversion          |     |                                                                                                                                                                                                                                                                                                                                                       |                  |
| 28 |                         |     |                                                                                                                                                                                                                                                                                                                                                       |                  |
| 29 |                         |     |                                                                                                                                                                                                                                                                                                                                                       |                  |
| 30 |                         |     |                                                                                                                                                                                                                                                                                                                                                       |                  |
| 31 | Choice of model         | 15  | Describe and give reasons for the specific type of decision-analytical model used. Providing a figure to show model structure is strongly recommended.                                                                                                                                                                                                | <u>page 7-9</u>  |
| 32 |                         |     |                                                                                                                                                                                                                                                                                                                                                       |                  |
| 33 |                         |     |                                                                                                                                                                                                                                                                                                                                                       |                  |
| 34 | Assumptions             | 16  | Describe all structural or other assumptions underpinning the decision-analytical model.                                                                                                                                                                                                                                                              | <u>page 7-9</u>  |
| 35 |                         |     |                                                                                                                                                                                                                                                                                                                                                       |                  |
| 36 |                         |     |                                                                                                                                                                                                                                                                                                                                                       |                  |
| 37 | Analytical methods      | 17  | Describe all analytical methods supporting the evaluation. This could include methods for dealing with skewed, missing, or censored data; extrapolation methods; methods for pooling data; approaches to validate or make adjustments (such as half cycle corrections) to a model; and methods for handling population heterogeneity and uncertainty. | <u>page 7-9</u>  |
| 38 |                         |     |                                                                                                                                                                                                                                                                                                                                                       |                  |
| 39 |                         |     |                                                                                                                                                                                                                                                                                                                                                       |                  |
| 40 |                         |     |                                                                                                                                                                                                                                                                                                                                                       |                  |
| 41 |                         |     |                                                                                                                                                                                                                                                                                                                                                       |                  |
| 42 |                         |     |                                                                                                                                                                                                                                                                                                                                                       |                  |
| 43 |                         |     |                                                                                                                                                                                                                                                                                                                                                       | <u>page 9-11</u> |
| 44 |                         |     |                                                                                                                                                                                                                                                                                                                                                       |                  |
| 45 | <b>Results</b>          |     |                                                                                                                                                                                                                                                                                                                                                       |                  |
| 46 | Study parameters        | 18  | Report the values, ranges, references, and, if used, probability distributions for all parameters. Report reasons or sources for distributions used to represent uncertainty where appropriate. Providing a table to show the input values is strongly recommended.                                                                                   | <u>page 9-11</u> |
| 47 |                         |     |                                                                                                                                                                                                                                                                                                                                                       |                  |
| 48 |                         |     |                                                                                                                                                                                                                                                                                                                                                       |                  |
| 49 |                         |     |                                                                                                                                                                                                                                                                                                                                                       |                  |
| 50 |                         |     |                                                                                                                                                                                                                                                                                                                                                       |                  |
| 51 | Incremental costs and   | 19  | For each intervention, report mean values for the main categories of estimated costs and outcomes of interest, as well as mean differences between the comparator groups. If applicable, report incremental cost-effectiveness ratios.                                                                                                                | <u>page 9-11</u> |
| 52 | outcomes                |     |                                                                                                                                                                                                                                                                                                                                                       |                  |
| 53 |                         |     |                                                                                                                                                                                                                                                                                                                                                       |                  |
| 54 |                         |     |                                                                                                                                                                                                                                                                                                                                                       |                  |
| 55 |                         |     |                                                                                                                                                                                                                                                                                                                                                       |                  |
| 56 | Characterising          | 20a | <i>Single study-based economic evaluation:</i> Describe the effects of sampling uncertainty for the estimated incremental cost and incremental effectiveness parameters, together with the impact                                                                                                                                                     | <u>page 9-11</u> |
| 57 | uncertainty             |     |                                                                                                                                                                                                                                                                                                                                                       |                  |
| 58 |                         |     |                                                                                                                                                                                                                                                                                                                                                       |                  |
| 59 |                         |     |                                                                                                                                                                                                                                                                                                                                                       |                  |
| 60 |                         |     |                                                                                                                                                                                                                                                                                                                                                       |                  |

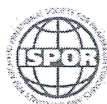

|                                                                      |     |                                                                                                                                                                                                                                                                            |                   |
|----------------------------------------------------------------------|-----|----------------------------------------------------------------------------------------------------------------------------------------------------------------------------------------------------------------------------------------------------------------------------|-------------------|
|                                                                      |     | of methodological assumptions (such as discount rate, study perspective).                                                                                                                                                                                                  | <u>NA</u>         |
|                                                                      | 20b | <i>Model-based economic evaluation</i> : Describe the effects on the results of uncertainty for all input parameters, and uncertainty related to the structure of the model and assumptions.                                                                               | <u>page 10-11</u> |
| Characterising heterogeneity                                         | 21  | If applicable, report differences in costs, outcomes, or cost-effectiveness that can be explained by variations between subgroups of patients with different baseline characteristics or other observed variability in effects that are not reducible by more information. | <u>page 11-13</u> |
| <b>Discussion</b>                                                    |     |                                                                                                                                                                                                                                                                            |                   |
| Study findings, limitations, generalisability, and current knowledge | 22  | Summarise key study findings and describe how they support the conclusions reached. Discuss limitations and the generalisability of the findings and how the findings fit with current knowledge.                                                                          | <u>page 18</u>    |
| <b>Other</b>                                                         |     |                                                                                                                                                                                                                                                                            |                   |
| Source of funding                                                    | 23  | Describe how the study was funded and the role of the funder in the identification, design, conduct, and reporting of the analysis. Describe other non-monetary sources of support.                                                                                        | <u>page 18</u>    |
| Conflicts of interest                                                | 24  | Describe any potential for conflict of interest of study contributors in accordance with journal policy. In the absence of a journal policy, we recommend authors comply with International Committee of Medical Journal Editors recommendations.                          |                   |

For consistency, the CHEERS Statement checklist format is based on the format of the CONSORT statement checklist

The **ISPOR CHEERS Task Force Report** provides examples and further discussion of the 24-item CHEERS Checklist and the CHEERS Statement. It may be accessed via the *Value in Health* link or via the ISPOR Health Economic Evaluation Publication Guidelines – CHEERS: Good Reporting Practices webpage: <http://www.ispor.org/TaskForces/EconomicPubGuidelines.asp>

The citation for the CHEERS Task Force Report is:

Husereau D, Drummond M, Petrou S, et al. Consolidated health economic evaluation reporting standards (CHEERS)—Explanation and elaboration: A report of the ISPOR health economic evaluations publication guidelines good reporting practices task force. *Value Health* 2013;16:231-50.

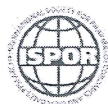

# BMJ Open

## Public preferences for interventions to prevent emerging infectious disease threats: a discrete choice experiment

|                                 |                                                                                                                                                                                                                                                                                                                                                                                          |
|---------------------------------|------------------------------------------------------------------------------------------------------------------------------------------------------------------------------------------------------------------------------------------------------------------------------------------------------------------------------------------------------------------------------------------|
| Journal:                        | <i>BMJ Open</i>                                                                                                                                                                                                                                                                                                                                                                          |
| Manuscript ID                   | bmjopen-2017-017355.R1                                                                                                                                                                                                                                                                                                                                                                   |
| Article Type:                   | Research                                                                                                                                                                                                                                                                                                                                                                                 |
| Date Submitted by the Author:   | 05-Jul-2017                                                                                                                                                                                                                                                                                                                                                                              |
| Complete List of Authors:       | Cook, Alex; National University Singapore Singapore, Saw Swee Hock School of Public Health<br>Zhao, Xiahong; National University of Singapore, Saw Swee Hock School of Public Health<br>Chen, Mark I-Cheng; National University of Singapore, Saw Swee Hock School of Public Health<br>Finkelstein, Eric; Duke-NUS Graduate Medical School, Health Services and Systems Research Program |
| <b>Primary Subject Heading</b>: | Health policy                                                                                                                                                                                                                                                                                                                                                                            |
| Secondary Subject Heading:      | Health policy, Health economics, Infectious diseases, Public health                                                                                                                                                                                                                                                                                                                      |
| Keywords:                       | Public health < INFECTIOUS DISEASES, Discrete choice experiment, Emerging infectious diseases, Interventions                                                                                                                                                                                                                                                                             |
|                                 |                                                                                                                                                                                                                                                                                                                                                                                          |

SCHOLARONE™  
Manuscripts

1  
2  
3  
4  
5  
6  
7  
8  
9  
10  
11  
12  
13  
14  
15  
16  
17  
18  
19  
20  
21  
22  
23  
24  
25  
26  
27  
28  
29  
30  
31  
32  
33  
34  
35  
36  
37  
38  
39  
40  
41  
42  
43  
44  
45  
46  
47  
48  
49  
50  
51  
52  
53  
54  
55  
56  
57  
58  
59  
60

## Public preferences for interventions to prevent emerging infectious disease threats: a discrete choice experiment

Running title: Preferences for outbreak interventions

### Authors (family names underlined):

Alex R Cook\*, PhD<sup>1,2,3,4</sup>, Xiahong Zhao, BSc<sup>1</sup>, Mark IC Chen MBBS, MPH, PhD<sup>1,3</sup>, Eric A Finkelstein, PhD, MHA<sup>1,2</sup>

<sup>1</sup>Saw Swee Hock School of Public Health, National University of Singapore and National University Health System, Singapore, Singapore

<sup>2</sup>Program in Health Services and Systems Research, Duke-NUS Graduate Medical School Singapore, Singapore, Singapore

<sup>3</sup>Communicable Disease Centre, Tan Tock Seng Hospital, Singapore, Singapore

<sup>4</sup>Department of Statistics and Applied Probability, National University of Singapore, Singapore, Singapore

### Author for correspondence:

Dr Alex R Cook; alex.richard.cook@gmail.com; +65 83 69 60 91

Saw Swee Hock School of Public Health, National University of Singapore, MD1, 12 Science Drive 2, Singapore 117549

Alternative if Cook unavailable: Prof Eric Finkelstein; eric.finkelstein@duke-nus.edu.sg

### Key Words

Public health, discrete choice experiment, emerging infectious diseases, interventions

## Abstract

**Objective** When faced with an emergent epidemic with high mortality and morbidity potential, policy makers must decide what public health interventions to deploy at different stages of the outbreak. However, almost nothing is known about how the public view these interventions or how they trade off risks (of disease) with inconvenience (of interventions). In this paper, we aim to understand public perceptions on pandemic interventions, as well as to identify if there are any distinct respondent preference classes.

**Design** A discrete choice experiment.

**Setting** This study was fielded in Singapore between November 2012 and February 2013.

**Participants** A random sample of 500 Singapore residents aged 21 and over, including 271 women and 229 men, was analysed.

**Outcome measures** Demographic information was collected from each participant. Participants were also shown a series of pairs of alternatives, each combining interventions and morbidity, mortality and cost outcomes, and declared a preference for one combination. A random utility model was developed to determine the individual's preference for interventions and a hierarchical cluster analysis was performed to identify distinct respondent preference classes.

**Results** On average, participants preferred more intense interventions, and preferred scenarios with fewer deaths and lower tax. The number of infections did not significantly influence respondents' responses. We identified two broad classes of respondents: those who were mortality averse and those who were expenditure averse. Education was found to be a predictor of group membership.

**Conclusion** Overall, there was considerable support for government interventions to prevent or mitigate outbreaks of emerging infectious diseases, including those that greatly restricted individual liberties, as long as the restrictions showed a reasonable chance of reducing the adverse health effects of the outbreak.

(275 words)



## Strengths and limitations of this study

- This study conducts discrete choice experiments that allow strength of preferences for different pandemic preparedness interventions among the general public to be estimated.
- A hierarchical cluster analysis identifies key population subgroups that perceive the public health response differently from the general population.
- The study design and statistical methods proposed in this study can be easily adapted to other settings.
- The public reaction is unpredictable, and it may depend on the severity and symptoms of the disease.

## Introduction

The last decade has witnessed the emergence of several emerging infectious diseases, including the first influenza pandemic of the 21st century<sup>1</sup>, avian influenza A(H7N9) outbreaks<sup>2-4</sup>, a novel coronavirus (MERS-CoV) that emerged in Saudi Arabia<sup>5</sup> and spread around the Middle East and Western Pacific<sup>6,7</sup>, the Ebola crisis in Western Africa<sup>8</sup> and the Zika outbreak in the Americas and Asia<sup>9,10</sup>. When faced with such threats—the impact of which is hard to predict in advance, as witnessed in the very different impact of recent outbreaks (e.g. a quarter of a million deaths for influenza A(H1N1pdm)<sup>11</sup>, over 10 000 deaths during the 2014/5 Ebola crisis<sup>12</sup>, or around 600 deaths from MERS-CoV<sup>13</sup>)—policy makers worldwide have to decide which public health interventions to deploy should such an emerging infectious disease cause an outbreak in their territory. Following the emergence of the Severe Acute Respiratory Syndrome Coronavirus (SARS-CoV) in 2003<sup>14</sup>, and the ongoing transmission of avian influenza A(H5N1) in South East Asia<sup>15,16</sup> and China<sup>17</sup>, the WHO urged governments to develop pandemic preparedness plans<sup>18</sup> as it revised the International Health Regulations in 2005<sup>19</sup>. Details vary between countries<sup>20,21</sup>, and the influenza A(H1N1) pandemic of 2009 demonstrated clearly that willingness to respond also varied substantially between countries, with several Asian countries adopting more aggressive response policies<sup>22-24</sup> than the approach common in America and Europe, which could be described as being more proportionate to the severity of the epidemics that came to pass.

In the aftermath of the 2009 influenza pandemic, particularly severe criticism was voiced from some European quarters that health authorities and the WHO over-reacted in their response to the influenza A(H1N1) pandemic of 2009<sup>25</sup>. Others argued that the prior experiences with SARS-CoV and H5N1 justified a robust response to the influenza A(H1N1pdm09) pandemic in 2009<sup>22,23</sup>. For instance, in Singapore, where SARS-CoV caused 238 infections, 33 deaths, and reduced annual GDP by 1%<sup>26</sup>, there was a strong governmental response, with over 8,000 contacts of SARS-CoV cases quarantined<sup>27</sup>. Singapore's health authorities used similarly robust measures during the influenza pandemic in 2009, and initially mandated isolation of confirmed cases, quarantining of exposed individuals, and temperature screening in hospitals, public places and ports of entry<sup>28</sup>. This was in spite of the paucity of evidence that such measures would make any difference to the overall course of the pandemic.

Since public acceptance is vital for many outbreak response policies to have the intended effect, public health decision making must go beyond accurate assessments of the severity of a threat and what measures might be effective against it. It has to calibrate policy to the public's willingness to accept the trade-offs associated with a given response to the outbreak, and a framework is needed for assessing

1  
2  
3 this while recognizing the diversity of views between and within populations as to what they value. This  
4 framework must be able to accommodate a diversity of scenarios on the key characteristics of the  
5 threat, and the suite of public health interventions available.  
6  
7

8  
9 Public health policy makers have several constituencies, but chief among these is the populace on  
10 whose behalf they make decisions. Yet, while tolerance and potential impact of interventions can (and  
11 should be) be assessed through surveys<sup>29</sup>, when it comes to pandemic preparedness, it is remarkable  
12 how little is known about what interventions the general population actually wants their governments  
13 to undertake. This gap is especially noteworthy due to the considerable personal burden imposed by  
14 some interventions and the backlash against what some deemed excessive measures during the 2009  
15 influenza pandemic<sup>25,30</sup>.  
16  
17

18 To this end, we conducted a 'conjoint' discrete choice experiment to explore the Singapore public's  
19 willingness to accept certain containment and mitigation strategies under various outbreak scenarios,  
20 spanning a range of infection and fatality rates. Specifically we assess three broad questions: (i) How  
21 informed are the public about infectious disease outbreaks and the effectiveness of different  
22 interventions? (ii) How much do the public support interventions—quarantine, isolation of contacts,  
23 school closure and mass screening—that restrict civil liberties in an outbreak? (iii) How consistent are  
24 overall preferences for intervention policies throughout the population? Are there subgroups whose  
25 preferences are in opposition to the majority? We hypothesised that the population would be broadly  
26 supportive of interventions that restricted their civil liberties, but that they might be averse to monetary  
27 impacts of those interventions. Our work was motivated by the past vulnerability of Singapore to a  
28 diversity of emerging infectious disease threats such as Nipah virus in the 1990s<sup>31</sup>, to SARS-CoV in  
29 2003<sup>32</sup>, Chikungunya in 2008<sup>33</sup>, pandemic influenza A(H1N1pdm09) in 2009<sup>34</sup> and the Zika epidemic in  
30 2016<sup>35</sup>, and its perceived vulnerability to future threats, given its location at the centre of South East  
31 Asia where various highly pathogenic strains of avian influenza continue to spread, its role as a transport  
32 hub, its highly urbanized environment and its tropical climate, which permits year round transmission of  
33 many viruses<sup>36</sup>. These results are hence intended to allow policy makers to identify policies which will  
34 have high levels of public support and are hence expected to translate into high levels of compliance,  
35 while exemplifying a method that can be used to address the same questions in different settings.  
36  
37  
38  
39  
40  
41  
42  
43  
44  
45  
46  
47  
48  
49  
50  
51  
52  
53

## 54 **Methods**

### 55 **Fielding and sample**

1  
2  
3 This survey was fielded in Singapore between November 2012 and February 2013 by a market research  
4 company contracted by the authors. The sampling frame was based on a list of households obtained  
5 from the Singapore national database of dwellings and continued until 500 responses with written  
6 informed consent were obtained, which required 1,196 households to be contacted (yielding an  
7 unadjusted response rate of 41.8%). Respondent eligibility could not be determined in 41 households.  
8 The remaining households were found to have at least one eligible respondent (citizen or permanent  
9 resident aged 21 and over). For those with multiple eligible respondents, one was randomly selected to  
10 take the survey. Trained interviewers administered the paper survey face-to-face in English, Malay,  
11 Mandarin or Tamil. Participants were guided through the discrete choice experiment by the interviewer.  
12 The study was approved by the National University of Singapore Institutional Review Board. All methods  
13 were performed in accordance with relevant guidelines and regulations.  
14  
15  
16  
17  
18  
19  
20  
21  
22

### 23 **Survey structure**

24 The survey questioned respondents' travel habits, experience with two previous infectious disease  
25 outbreaks in Singapore (the 2009 influenza A(H1N1pdm09) pandemic and the 2003 SARS-CoV  
26 outbreaks), attitudes towards and knowledge of the effectiveness of interventions, and beliefs about the  
27 burden of infectious diseases in Singapore. Participants were also asked how frequently they attended  
28 various crowded public places and whether they would reduce such attendance in response to an  
29 outbreak. Socio-demographic questions were also included.  
30  
31  
32  
33  
34  
35

36 The core of the survey was a discrete choice experiment (DCE), which is a method often used to identify  
37 preferences for, importance of, and willingness-to-pay (WTP) for specific features of products that are  
38 composed of multiple features. In this case, we used it to elicit preferences for specific policy responses  
39 to an infectious disease outbreak, and report WTP as an easy to understand scale of support. Each policy  
40 scenario consists of a number of attributes (for example social distancing) and each attribute of a  
41 number of levels (for example, none, closure of schools, or closure of schools and cancellation of mass  
42 gatherings). Each participant was provided a series of ten pairs of hypothetical alternatives, and for each  
43 pair was asked to select one of the two options (with a combination of one level for each attribute) as  
44 being his or her preference. An example of a typical pair of options is provided in **Table 1**. Each pair  
45 contains the same attributes but different levels of each attribute; the attributes and levels used are  
46 found in **Table 2**.  
47  
48  
49  
50  
51  
52  
53  
54

55 The first four attributes include interventions which were used in Singapore and other countries at  
56 various points of the 2009 influenza pandemic, 2003 SARS outbreak, and in response to other emerging  
57  
58  
59  
60

1  
2  
3 outbreaks. The fifth assesses the tolerance to economic losses. The final two summarize the severity of  
4 the outbreak, in size (number of cases) and fatality rates.  
5  
6

7  
8 Five of the seven attributes consisted of measures the government could take to restrict the spread of  
9 an emerging infectious disease. We excluded vaccination as a control measure due to the long lead time  
10 required to get a vaccine to market, which is six months for a reformulated influenza vaccine<sup>37</sup> but can  
11 be much longer (for dengue, for instance, it has taken decades<sup>38</sup>). The Singapore government, during the  
12 2009 influenza pandemic and 2003 SARS-CoV outbreaks, quarantined suspected cases and enforced the  
13 isolation of actual cases. Both of these measures were included as attributes with two levels for each:  
14 mandatory and voluntary. The cancellation of mass gatherings was also included as an attribute with  
15 levels ranging from no cancellations to the closure of schools and prohibition of other types of mass  
16 gatherings. Temperature screening using thermal scanners was used during both the two events in  
17 Singapore and was therefore also included with different levels indicating whether the screenings were  
18 to be conducted only at border checkpoints, at checkpoints and other sites within Singapore, or not at  
19 all. Finally, a monetary attribute was included which posited a hypothetical one-time tax to fund control  
20 efforts with the following values: S\$15, S\$20, S\$40 and S\$50 (in 2013 S\$1 ≈ US\$0.80). The two  
21 remaining attributes described the outcome of an infectious disease outbreak in terms of two metrics:  
22 the expected number of infections (five levels ranging from 200 to 1,000,000 cases) and the expected  
23 number of infection-related deaths (five levels; 0 – 180 deaths). Attributes and levels for the survey  
24 were determined through literature review, cognitive interviews, and piloting a draft instrument  
25 (n=50)<sup>39</sup> to span plausible ranges for emerging infectious disease outbreaks or pandemics.  
26  
27  
28  
29  
30  
31  
32  
33  
34  
35  
36  
37  
38  
39

40 Following standard practice in DCEs<sup>39</sup>, respondents saw a fractional DCE design that is statistically  
41 efficient, minimizes level overlap (where levels do not vary across competing options) and ensures level  
42 balance (each level appears approximately the same number of times)<sup>40</sup>. The design was produced using  
43 Sawtooth SSI Web v8-22 and included four versions, each version containing ten tasks. Individual level  
44 data are available in **Supplementary Data 1 and 2**.  
45  
46  
47  
48

## 49 **Analyses**

50 **Model overview:** The analysis uses a random utility model (RUM), which posits that respondents choose  
51 the option which provides them greater satisfaction/utility. By regressing respondent choices on the  
52 policy attributes and levels, we derived preference weights for each attribute-level, when all other  
53 attribute levels are held constant. The model assumes that the utility of a given scenario is a linear  
54  
55  
56  
57  
58  
59  
60

1  
2  
3 combination of the utilities associated with each attribute of the scenario, from interventions to  
4 outcomes, plus Gaussian noise. In addition, a hierarchical model was developed in which individuals  
5 were allowed differing utilities, the output of which was used to cluster individuals into groups.  
6  
7

8  
9 **Model formulation:** A single attribute  $a$  has  $L_a$  levels. A single set of policy/outcome options contains  $A$   
10 attributes in all, and so the information about the set is contained in the object  $(l_1, l_2, \dots, l_A)$ . To  
11 facilitate analysis, the information is reformulated as a vector of dummy variables,  $(x_1, x_2, \dots, x_K)$  where  
12  $K = \sum_{a=1}^A (L_a - 1)$  (1) is the total number of dummy variables, and where the dummy variables are  
13 coded 1 and 0 to indicate which levels are present for each attribute. One level per attribute is omitted  
14 to be treated as the baseline. We indicate sets via superscripts on the  $x$ s. The exception to this is the  
15 monetary variable which was left as a numerical value.  
16  
17

18 The average utility  $\mu_b$  over individuals in the population presented with a set of options  $b$  is modelled as  
19 a linear combination of utility components  
20  
21

$$\mu_b = \sum_{k=1}^K \beta_k x_k^b \quad (2)$$

22 where the  $\beta$ s capture the utility of each component. The utility experienced in the  $i$ th response is  
23 assumed to be  $u_{ib} \sim N(\mu_b, \sigma^2)$  (3). The respondent reports whether  $u_{i1} > u_{i2}$  or not. If we denote the  
24 difference between these utilities as  $\delta_i = u_{i1} - u_{i2}$  (4) then  $\delta_i \sim N(\mu_1 - \mu_2, 2\sigma^2)$  (5). We observe  $y_i$   
25 which is 1 if  $\delta_i > 0$  and 0 otherwise. The likelihood of the data therefore follows directly.  
26  
27

28 WTP for a given change in a policy scenario is the amount of cash (in this case a one-time tax) that  
29 would leave a respondent indifferent between paying (or receiving payment) for the attribute levels in a  
30 new scenario or remain with the original scenario. Although individuals cannot directly pay for public  
31 health interventions that apply to society as a whole, WTP serves as a useful gauge for strength of  
32 support for or against a policy measure. The WTP can be estimated by comparing the change in utility  
33 between the scenarios and the marginal utility of the tax attribute. The utility of tax was assumed to be  
34 linear, creating a single utility to money mapping that permitted the posterior distribution of  
35 willingness-to-pay (in units of one Singapore dollar) to be derived by taking the ratio of the other  $\beta$ s to  
36 the tax  $\beta$ .  
37  
38

39 **Subgroup analysis:** We then employed a hierarchical cluster analysis with Wald's method to identify  
40 distinct respondent preference classes. To account for the between individual variation, a hierarchical  
41 model was fitted. This model is similar as the original model, but the utility parameter  $\beta$  varies by  
42  
43  
44  
45  
46  
47  
48  
49  
50  
51  
52

individual. The utility parameter,  $\beta_{ik}$ , for individual  $i$  attribute  $k$  was assigned a Normal prior, i.e.  $\beta_{ik} \sim N(\mu_k, \sigma_k^2)$  (6). Following parameter estimation (see next section), the Euclidean distance matrix used for cluster analysis was calculated from posterior mean utilities associated with each attribute and each individual. The number of latent classes was determined using the dendrogram from the cluster analysis, centroid plot from a two-group linear discriminant analysis, and elbow plot. Demographic predictors of class membership were then determined through logistic regression.

**Model fitting:** In the main model, flat prior distributions were assigned to each  $\beta_k$  and to  $\log \sigma$ . To ensure identifiability, one exception is made: the extreme level for one attribute (180 deaths) was set to  $-1$  so that all other utilities are relative to that. The choice of the variable to anchor the utility scale to was made on pilot runs. In the hierarchical model used for clustering, the hyperprior distributions for  $\mu_k$  and  $\sigma_k^2$  followed a normal distribution  $N(0, 10)$  and an inverse-gamma distribution with a shape of 0.1 and a scale of 0.1, respectively. The model was fit using the Rstan package<sup>41</sup> that used the Stan language<sup>42</sup> to sample from the posterior distribution for the parameters resulting from the model described above. This used a Hamiltonian Monte Carlo algorithm<sup>43</sup>. In total 500,000 draws with a thin of 5 iterations from the posterior were made, and convergence assessed visually. Analyses were done in R<sup>44</sup>.

**Variant model:** An alternative model was also constructed in which the linear tax variable was transformed using three dummy variables representing the tax effect of \$20, \$40 and \$50 compared with \$15. Similar results were obtained.

## Results

### Survey respondents

**Table 3** presents demographic characteristics for the 500 respondents and for a comparable population from the 2010 Singapore census. Although the age, gender, racial group, employment status and family status distributions are similar between the groups, the sample has a higher proportion of those educated to a polytechnic diploma level or higher (45.2% compared to 38.0% in census).

### Attitudes and knowledge

The fraction predicting there would be an infectious disease outbreak in Singapore infecting more than 200 people over the next 12 months was 29% (95%CI 25%–33%, see **Figure 1**); the estimate for an outbreak infecting more than a million people (i.e. around a fifth of the total population) was much

1  
2  
3 lower (10%, 95%CI 7%–12%). Mortality estimates also varied, with 20% (95%CI 16%–23%) predicting it  
4 likely that there would be an outbreak which kills more than 30, and 9% (95%CI 6%–11%) predicting one  
5 which kills more than 180 people, in the next year.  
6  
7

8  
9 When asked about each intervention in isolation, a large majority of respondents favoured a policy of  
10 quarantine for potentially infected contacts (83%, 95%CI 79%–86%, see **Figure 1**). Isolation for  
11 diagnosed cases of infection was favoured by an even larger proportion (95%, 95%CI 93%–97%). Most of  
12 the sample was also in favour of temperature screenings (though the proportion was higher for  
13 screenings conducted at the border than elsewhere: 95% [94%–98%] vs. 89% [87%–92%]). Temperature  
14 screening was thought to be somewhat or very effective by 91% (89–94%) and quarantine by 95% (94–  
15 97%).  
16  
17  
18  
19  
20  
21

22 On attendance at crowded events or venues, the venue most frequently attended by survey participants  
23 were hawker centres (naturally ventilated food courts), where 29% (95%CI 25%–33%) went daily, and  
24 48% (95%CI 43%–52%) went weekly. A substantial fraction (60%, 95%CI 56%–64%) reported going to  
25 shopping malls at least weekly, as opposed to 28% (95%CI 24%–32%) who reported going to religious  
26 gatherings and 3% (95%CI 2%–5%) to festivals. When asked whether they would limit attendance at  
27 mass gatherings in the event of an infectious disease outbreak, a significant proportion reported they  
28 would not: 58% (95%CI 50–67%) of those attending religious gatherings weekly and 51% (95%CI 43–  
29 59%) of daily hawker centre patrons stated they would not reduce the frequency of attendance.  
30  
31  
32  
33  
34  
35  
36

### 37 **Overall preferences for interventions and willingness to pay**

38 **Figure 2A** presents utilities for the entire sample excluding 7 with missing responses (full regression  
39 results are included in the **supplementary materials**). In outbreaks with at least 200 cases (the scenarios  
40 proffered), the sample as a whole marginally preferred mandatory to voluntary quarantine and  
41 isolation. They also favoured the cancellation of all mass gatherings and temperature screenings at sites  
42 all around Singapore. The two certainties of life—death and taxes—were disfavoured, but respondents'  
43 preferences were not influenced by the number of infections.  
44  
45  
46  
47  
48  
49

50 **Table 4** shows how respondents valued, in monetary terms, different policy options or outcomes, based  
51 on their estimated WTP (parameter estimates [posterior means, 95% credible intervals] are presented in  
52 **Supplementary Table S1 and S2** for the models with and without linear terms for the tax attribute). In  
53 general, respondents preferred more intervention, rather than less, and were willing to accept a loss of  
54 S\$370 million at the societal level for the full set of interventions considered for implementation.  
55  
56  
57  
58  
59  
60



1  
2  
3 Participants indicated via their choices a willingness to accept (personal) costs of up to S\$34 (S\$19, S\$58)  
4 to prevent 30 deaths, S\$70 (S\$45, S\$112) to prevent 80, S\$71 (S\$49, S\$109) to prevent 120 and S\$98  
5 (\$\$69, S\$148) to prevent 180—at a national level, these imply a willingness to pay ~ S\$0.5M to S\$1M for  
6 each life saved. The value placed on a strong response (mandatory isolation and quarantine, cancelling  
7 all mass gatherings, and islandwide screening), S\$74, thus approximately corresponded to the value  
8 placed on preventing 100 deaths.  
9

### 14 **Group preferences**

15  
16 The hierarchical cluster analysis determined that the sample included two subgroups, and based on the  
17 following results we labelled these groups *mortality-averse* and *expenditure-averse* (estimates in  
18 **Supplementary Table S1 and S2**). Cluster analysis results for these groups are shown in **Figure 3**, while  
19 utilities for the two groups are presented in **Figures 2B and 2C**. The mortality-averse group (n=317, 63%)  
20 was in favour of the actual deployment of interventions, whereas the expenditure-averse group (n=183,  
21 37%) expressed a strong disutility for a tax to cover the response and were ambivalent about mandatory  
22 isolation of confirmed cases. Both two groups, as expected, favoured a lower number of deaths, though  
23 the strength of preference varied substantially, with the mortality-averse group expressing a large  
24 disutility and the expenditure-averse a much smaller one. Neither group found reducing the number of  
25 infections important.  
26  
27  
28  
29  
30  
31  
32  
33

### 34 **Predictors of class membership**

35  
36 Those with post-secondary school education were more likely to belong to the *mortality-adverse* group  
37 than to belong to the *expenditure-averse* group (adjusted odds ratio: 1.71, 95% CI: 1.12 – 2.61). Other  
38 demographic variables were not predictive of class membership (see **Figure 4**).  
39  
40  
41

### 42 **Discussion**

43  
44 Research on interventions to prevent or mitigate pandemics has assessed their effectiveness, using  
45 modelling<sup>45,46</sup> or empirical evidence<sup>47,48</sup>, on their indirect effects<sup>49,50</sup>, their economic impacts<sup>51,52</sup>, and the  
46 legal and ethical issues surrounding their use<sup>53</sup>. This paper presents what we believe to be one of the  
47 first studies to measure the preferences of members of the public for control policies that form part of  
48 established pandemic preparedness plans.  
49  
50  
51  
52

53  
54 As in many countries, Singaporean law permits the government to curtail civil liberties in response to an  
55 infectious disease outbreak (in Singapore's case, under the Infectious Diseases Act), but the use of this  
56 power to isolate cases or quarantine potential cases requires careful weighting of the risk to others from  
57  
58  
59  
60

1  
2  
3 not acting versus the loss of liberty of the individual being isolated or quarantined<sup>53</sup>. Our survey found  
4 that most Singaporeans reported a high tolerance for interventions that curtail individual liberties,  
5 which may be related to their long-standing acceptance of a paternalistic streak in their government<sup>54</sup>.  
6  
7 Most participants supported the isolation of known cases and the quarantine of potential cases, both  
8 strategies that have been used in recent history in Singapore: in 2003 thousands of contacts of SARS-  
9 CoV cases were isolated or put under daily telephone surveillance<sup>27</sup>, while in the early period of the  
10 2009 epidemic, cases with confirmed influenza A(H1N1pdm09) infection and their household contacts  
11 were isolated at home, with foreigners detained in Government Quarantine Facilities<sup>55</sup>. While such  
12 popular support does not justify a policy of isolation or quarantine *per se*, it may facilitate the effective  
13 implementation of such a policy.  
14  
15  
16  
17  
18  
19

20  
21 Overall, utilities of all participants were high for the more intense control measures, i.e. given the same  
22 number of infections and deaths, respondents reported preferring mandatory isolation, quarantine, and  
23 social distancing. It is not clear how effective social distancing measures would be in a mild outbreak,  
24 however, as many respondents reported that they would not voluntarily reduce how frequently they go  
25 out to eat or shop. It may be the implicit recognition of this that made the majority of participants  
26 recognize that isolation and quarantine should be mandatory rather than voluntary. Results reveal that  
27 the preferences of the population are not uniform; respondents could be broadly categorized into two  
28 groupings: one group (*mortality averse*) was strongly motivated to reduce the number of deaths and  
29 willing to accept interventions that did so, whereas another (*expenditure averse*, 37% of our  
30 respondents) was tax averse, and not in favour of any measures that might increase their taxes, even at  
31 levels comparable to the per capita costs of Singapore's routine dengue vector control program<sup>56</sup>.  
32  
33  
34  
35  
36  
37  
38  
39  
40

41 Discrete-choice experiments can inform policy makers as to how much support there would be for  
42 potentially disruptive measures such as quarantine, isolation and school closures, and what kind of  
43 public health information might garner support from those otherwise not in favour. In Singapore, given  
44 our findings, this might involve stressing the necessity of such measures to reduce mortality, to co-opt  
45 the mortality-averse group, and to minimize the economic impact, to gain support from the sizeable tax-  
46 averse group. Studies such as this one can also identify misperceptions among the public that may  
47 hinder support for effective control. Two such examples surfaced in our study: (1) temperature  
48 screening island-wide received considerable support by our survey participants, although temperature  
49 screening at the country's main airport was estimated only to pick up around 1 imported case in 4 in  
50 2009<sup>28</sup>, and was increasingly ineffective as the infection became more widespread<sup>57</sup>, and (2) the  
51  
52  
53  
54  
55  
56  
57  
58  
59  
60

1  
2  
3 predicted risk of infectious disease outbreaks was considerably underestimated: 2013 saw ~ 20 000  
4 dengue infections in Singapore, but the mean forecast risk of an outbreak infecting at least 200 people  
5 was a mere 29%. Future studies might evaluate the effect of priming respondents with accurate public  
6 health information before eliciting their preferences. We included interventions that would be  
7 considered for use in response to an emerging infectious disease, and so did not consider vaccination  
8 given the lead time needed to develop a vaccine. For many vaccine-preventable infections, however,  
9 decisions about whether to be vaccinated are made by the individual, rather than by the government,  
10 and so alternative study designs might be better suited to determining features that lead to vaccine  
11 uptake and support, such as standard cross-sectional surveys<sup>58</sup>. Ethical issues regarding loss of liberty  
12 during an outbreak were not covered in our experiment, and should be explored in future studies,  
13 together with more contextual information on why policies were favoured or not<sup>59</sup>.  
14  
15  
16  
17  
18  
19  
20  
21  
22

23 Beyond its direct application to Singapore, our work holds a wider relevance on how governments and  
24 global health authorities can use such methods to inform better management of epidemics and  
25 pandemics. It has been argued that, during the influenza pandemic in 2009, the failure of WHO and  
26 government health agencies was not so much in their assessment of the severity of the threat or what  
27 interventions might be effective against it, but in being able to effectively communicate the risk and the  
28 benefits of select mitigation strategies<sup>60,61</sup>. Prior assessment of population level preferences could help  
29 identify thresholds of epidemic severity which could serve as triggers for the implementation of more  
30 disruptive measures. In addition, information from such surveys could be used to explain the rationale  
31 for particular decisions, with hierarchical cluster analysis used to support the targeting of different  
32 messages to audiences with different values. Whereas surveys have been performed retrospectively to  
33 gauge support for government responses to specific circumstances like the SARS-CoV outbreaks in 2003  
34 and influenza pandemic in 2009<sup>62,63</sup>, our method is the first conjoint analysis that quantifies public  
35 support for government interventions over a realistic range of outbreak scenarios and parameters.  
36  
37  
38  
39  
40  
41  
42  
43  
44  
45

46 Singapore is a city state in the centre of South East Asia that has experienced several emerging  
47 infectious disease threats and where there is a general acceptance that some civil liberties be  
48 constrained for the overall public good<sup>54</sup>. Her people mostly originate in China, India and the Malay  
49 Archipelago, and, culturally and socially, Singapore has much in common with other countries in South,  
50 East, and South-East Asia. Our study may therefore shed light on attitudes towards response to  
51 infectious disease threats in Asia, a hotspot for emerging infectious diseases<sup>64</sup>. Future research should  
52  
53  
54  
55  
56  
57  
58  
59  
60

1  
2  
3 extend the approach to African, American and European settings, where attitudes on the role the state  
4 should play in responding to public health threats may differ.  
5  
6

7  
8 The current study does have limitations. The response rate was low (41.8%) and although there were no  
9 significant differences when compared to the population age, gender, race, employment or family data,  
10 those with higher education were over-represented in our sample. A further limitation is that the study  
11 design elicits the public's preferences and trade-offs between known interventions and known  
12 outcomes of those interventions. However, at an early stage of an outbreak of a novel pathogen, policy  
13 makers face grave uncertainty about the outcomes of interventions because the characteristics of the  
14 pathogen's transmission routes and potential, the severity and symptoms of the disease it causes, and  
15 the public reaction is unpredictable. As a result, the decisions policy makers must continue to be based  
16 on scientific advice and political imperatives. Surveys such as this one permit a better understanding of  
17 those political imperatives in emerging infectious disease outbreaks.  
18  
19  
20  
21  
22  
23  
24

25  
26 In conclusion, we report what we believe is the first discrete choice experiment to assess support for  
27 policies to control an emerging infectious disease outbreak, finding high levels of support among the  
28 Singaporean population for interventions that curtail individual liberties. Similar studies in other settings  
29 would be useful for public health decision makers.  
30  
31  
32  
33  
34  
35  
36  
37  
38  
39  
40  
41  
42  
43  
44  
45  
46  
47  
48  
49  
50  
51  
52  
53  
54  
55  
56  
57  
58  
59  
60

## References

1. Chowell, G. *et al.* Characterizing the Epidemiology of the 2009 Influenza A/H1N1 Pandemic in Mexico. *PLOS Med.* **8**, e1000436 (2011).
2. Uyeki, T. M. & Cox, N. J. Global Concerns Regarding Novel Influenza A (H7N9) Virus Infections. *N. Engl. J. Med.* **368**, 1862–1864 (2013).
3. Gao, R. *et al.* Human Infection with a Novel Avian-Origin Influenza A (H7N9) Virus. *N. Engl. J. Med.* **368**, 1888–1897 (2013).
4. Gao, H.-N. *et al.* Clinical Findings in 111 Cases of Influenza A (H7N9) Virus Infection. *N. Engl. J. Med.* **368**, 2277–2285 (2013).
5. Zaki, A. M., van Boheemen, S., Bestebroer, T. M., Osterhaus, A. D. M. E. & Fouchier, R. A. M. Isolation of a Novel Coronavirus from a Man with Pneumonia in Saudi Arabia. *N. Engl. J. Med.* **367**, 1814–1820 (2012).
6. Ki, M. 2015 MERS outbreak in Korea: hospital-to-hospital transmission. *Epidemiol. Health* **37**, (2015).
7. The WHO MERS-CoV Research Group. State of Knowledge and Data Gaps of Middle East Respiratory Syndrome Coronavirus (MERS-CoV) in Humans. *PLOS Curr. Outbreaks* (2013).  
doi:10.1371/currents.outbreaks.0bf719e352e7478f8ad85fa30127ddb8
8. WHO Ebola Response Team. Ebola Virus Disease in West Africa — The First 9 Months of the Epidemic and Forward Projections. *N. Engl. J. Med.* **371**, 1481–1495 (2014).
9. Musso, D., Nilles, E. J. & Cao-Lormeau, V.-M. Rapid spread of emerging Zika virus in the Pacific area. *Clin. Microbiol. Infect.* **20**, O595–O596 (2014).
10. Hennessey, M., Fischer, M. & Staples, J. E. Zika Virus Spreads to New Areas — Region of the Americas, May 2015–January 2016. *Am. J. Transplant.* **16**, 1031–1034 (2016).
11. Dawood, F. S. *et al.* Estimated global mortality associated with the first 12 months of 2009 pandemic influenza A H1N1 virus circulation: a modelling study. *Lancet Infect. Dis.* **12**, 687–695 (2012).

12. WHO Ebola Response Team. West African Ebola Epidemic after One Year — Slowing but Not Yet under Control. *N. Engl. J. Med.* **372**, 584–587 (2015).
13. Cauchemez, S. *et al.* Unraveling the drivers of MERS-CoV transmission. *Proc. Natl. Acad. Sci.* **113**, 9081–9086 (2016).
14. Lipsitch, M. *et al.* Transmission Dynamics and Control of Severe Acute Respiratory Syndrome. *Science* **300**, 1966–1970 (2003).
15. Aditama, T. Y. *et al.* Risk factors for cluster outbreaks of avian influenza A H5N1 infection, Indonesia. *Clin. Infect. Dis. Off. Publ. Infect. Dis. Soc. Am.* **53**, 1237–1244 (2011).
16. Liem, N. T. *et al.* Clinical features of human influenza A (H5N1) infection in Vietnam: 2004-2006. *Clin. Infect. Dis. Off. Publ. Infect. Dis. Soc. Am.* **48**, 1639–1646 (2009).
17. Smith, G. J. D. *et al.* Characterization of avian influenza viruses A (H5N1) from wild birds, Hong Kong, 2004-2008. *Emerg. Infect. Dis.* **15**, 402–407 (2009).
18. WHO. *WHO global influenza preparedness plan: the role of WHO and recommendations for national measures before and during pandemics.* (World Health Organization, 2005).
19. Rodier, G., Greenspan, A. L., Hughes, J. M. & Heymann, D. L. Global public health security. *Emerg. Infect. Dis.* **13**, 1447–1452 (2007).
20. Coker, R. & Mounier-Jack, S. Pandemic influenza preparedness in the Asia-Pacific region. *Lancet* **368**, 886–889 (2006).
21. Mounier-Jack, S. & Coker, R. J. How prepared is Europe for pandemic influenza? Analysis of national plans. *Lancet* **367**, 1405–1411 (2006).
22. Leung, G. M. & Nicoll, A. Reflections on Pandemic (H1N1) 2009 and the International Response. *PLoS Med* **7**, e1000346 (2010).
23. Fisher, D. *et al.* Pandemic response lessons from influenza H1N1 2009 in Asia. *Respirol. Carlton Vic* **16**, 876–882 (2011).

- 1  
2  
3 24. Fineberg, H. V. Pandemic Preparedness and Response — Lessons from the H1N1 Influenza of 2009.  
4  
5 *N. Engl. J. Med.* **370**, 1335–1342 (2014).  
6  
7
- 8 25. O’Dowd, A. Council of Europe condemns ‘unjustified scare’ over swine flu. *BMJ* **340**, c3033–c3033  
9  
10 (2010).  
11
- 12 26. Keogh-Brown, M. R. & Smith, R. D. The economic impact of SARS: how does the reality match the  
13  
14 predictions? *Health Policy Amst. Neth.* **88**, 110–120 (2008).  
15  
16
- 17 27. Tan, C.-C. SARS in Singapore--key lessons from an epidemic. *Ann. Acad. Med. Singapore* **35**, 345–349  
18  
19 (2006).  
20  
21
- 22 28. Tay, J., Ng, Y. F., Cutter, J. L. & James, L. Influenza A (H1N1-2009) pandemic in Singapore--public  
23  
24 health control measures implemented and lessons learnt. *Ann. Acad. Med. Singapore* **39**, 313–312  
25  
26 (2010).  
27  
28
- 29 29. Blendon, R. J. *et al.* Public response to community mitigation measures for pandemic influenza.  
30  
31 *Emerg. Infect. Dis.* **14**, 778–786 (2008).  
32  
33
- 34 30. Doshi, P. The elusive definition of pandemic influenza. *Bull. World Health Organ.* **89**, 532–538  
35  
36 (2011).  
37
- 38 31. Paton, N. I. *et al.* Outbreak of Nipah-virus infection among abattoir workers in Singapore. *Lancet*  
39  
40 **354**, 1253–1256 (1999).  
41  
42
- 43 32. Hsu, L.-Y. *et al.* Severe acute respiratory syndrome (SARS) in Singapore: clinical features of index  
44  
45 patient and initial contacts. *Emerg. Infect. Dis.* **9**, 713–717 (2003).  
46  
47
- 48 33. Ng, L.-C. *et al.* Entomologic and virologic investigation of Chikungunya, Singapore. *Emerg. Infect. Dis.*  
49  
50 **15**, 1243–1249 (2009).  
51  
52
- 53 34. Lee, V. J. *et al.* Comparability of different methods for estimating influenza infection rates over a  
54  
55 single epidemic wave. *Am. J. Epidemiol.* **174**, 468–478 (2011).  
56  
57  
58  
59  
60

- 1  
2  
3  
4  
5  
6  
7  
8  
9  
10  
11  
12  
13  
14  
15  
16  
17  
18  
19  
20  
21  
22  
23  
24  
25  
26  
27  
28  
29  
30  
31  
32  
33  
34  
35  
36  
37  
38  
39  
40  
41  
42  
43  
44  
45  
46  
47  
48  
49  
50  
51  
52  
53  
54  
55  
56  
57  
58  
59  
60
35. Singapore Zika Study Group. Outbreak of Zika virus infection in Singapore: an epidemiological, entomological, virological, and clinical analysis. *Lancet Infect. Dis.* (2017). doi:10.1016/S1473-3099(17)30249-9
  36. Leo, Y.-S., Lye, D. C. & Chow, A. Influenza in the tropics. *Lancet Infect. Dis.* **9**, 457–458 (2009).
  37. Gerdil, C. The annual production cycle for influenza vaccine. *Vaccine* **21**, 1776–1779 (2003).
  38. Webster, D. P., Farrar, J. & Rowland-Jones, S. Progress towards a dengue vaccine. *Lancet Infect. Dis.* **9**, 678–687 (2009).
  39. Bridges, J. F. P. *et al.* Conjoint analysis applications in health—a checklist: a report of the ISPOR Good Research Practices for Conjoint Analysis Task Force. *Value Health J. Int. Soc. Pharmacoeconomics Outcomes Res.* **14**, 403–413 (2011).
  40. Zwerina, K., Huber, J. & Kuhfeld, W. F. *A General Method for Constructing Efficient Choice Designs.* 1–19 (SAS).
  41. Stan Development Team. *RStan: the R interface to Stan.* (2016).
  42. Stan Development Team. *Stan Modeling Language Users Guide and Reference Manual.* (2016).
  43. Neal, R. MCMC Using Hamiltonian Dynamics. in *Handbook of Markov Chain Monte Carlo* (Chapman and Hall/CRC, 2011). doi:10.1201/b10905-6
  44. R Core Team. *R: A language and environment for statistical computing.* (R Foundation for Statistical Computing, 2017).
  45. Longini, I. M., Halloran, M. E., Nizam, A. & Yang, Y. Containing Pandemic Influenza with Antiviral Agents. *Am. J. Epidemiol.* **159**, 623–633 (2004).
  46. Ferguson, N. M. *et al.* Strategies for containing an emerging influenza pandemic in Southeast Asia. *Nature* **437**, 209–214 (2005).
  47. Lee, V. J. *et al.* Oseltamivir ring prophylaxis for containment of 2009 H1N1 influenza outbreaks. *N. Engl. J. Med.* **362**, 2166–2174 (2010).



- 1  
2  
3 48. Jackson, C., Vynnycky, E., Hawker, J., Olowokure, B. & Mangtani, P. School closures and influenza:  
4  
5 systematic review of epidemiological studies. *BMJ Open* **3**, e002149 (2013).  
6  
7  
8 49. McVernon, J. *et al.* Recommendations for and compliance with social restrictions during  
9  
10 implementation of school closures in the early phase of the influenza A (H1N1) 2009 outbreak in  
11  
12 Melbourne, Australia. *BMC Infect. Dis.* **11**, 257 (2011).  
13  
14  
15 50. Chen, W.-C., Huang, A. S., Chuang, J.-H., Chiu, C.-C. & Kuo, H.-S. Social and economic impact of  
16  
17 school closure resulting from pandemic influenza A/H1N1. *J. Infect.* **62**, 200–203 (2011).  
18  
19  
20 51. Carrasco, L. R. *et al.* Strategies for antiviral stockpiling for future influenza pandemics: a global  
21  
22 epidemic-economic perspective. *J. R. Soc. Interface* **8**, 1307–1313 (2011).  
23  
24  
25 52. Meltzer, M. I., Cox, N. J. & Fukuda, K. The Economic Impact of Pandemic Influenza in the United  
26  
27 States: Priorities for Intervention. *Emerg. Infect. Dis.* **5**, 659–671 (1999).  
28  
29  
30 53. Gostin, L. O. *Public Health Law: Power, Duty, Restraint*. (Milbank Memorial Fund and University of  
31  
32 California Press, 2007).  
33  
34  
35 54. Means, G. P. Soft Authoritarianism in Malaysia and Singapore. *J. Democr.* **7**, 103–117 (1996).  
36  
37  
38 55. Speed, T. Pondering Statistical Genomics, H1N1 Flu, and Quarantined Life in Singapore. *Amstat*  
39  
40 *News* **386**, 9–11 (2009).  
41  
42  
43 56. Carrasco, L. R. *et al.* Economic Impact of Dengue Illness and the Cost-Effectiveness of Future  
44  
45 Vaccination Programs in Singapore. *PLoS Negl Trop Dis* **5**, e1426 (2011).  
46  
47  
48 57. Mukherjee, P. *et al.* Epidemiology of travel-associated pandemic (H1N1) 2009 infection in 116  
49  
50 patients, Singapore. *Emerg. Infect. Dis.* **16**, 21–26 (2010).  
51  
52  
53 58. Larson, H. J. *et al.* The State of Vaccine Confidence 2016: Global Insights Through a 67-Country  
54  
55 Survey. *EBioMedicine* **12**, 295–301 (2016).  
56  
57  
58 59. Siegel, K., Cook, A. R. & La, H. The impact of hand, foot and mouth disease control policies in  
59  
60 Singapore: A qualitative analysis of public perceptions. *J. Public Health Policy* 1–17 (2017).

- 1  
2  
3  
4  
5  
6  
7  
8  
9  
10  
11  
12  
13  
14  
15  
16  
17  
18  
19  
20  
21  
22  
23  
24  
25  
26  
27  
28  
29
60. Nicoll, A. & McKee, M. Moderate pandemic, not many dead--learning the right lessons in Europe from the 2009 pandemic. *Eur. J. Public Health* **20**, 486–488 (2010).
61. Low, D. E. & McGeer, A. Pandemic (H1N1) 2009: assessing the response. *CMAJ Can. Med. Assoc. J. J. Assoc. Medicale Can.* **182**, 1874–1878 (2010).
62. Hilton, S. & Smith, E. Public views of the UK media and government reaction to the 2009 swine flu pandemic. *BMC Public Health* **10**, 697 (2010).
63. Leung, G. M. *et al.* A tale of two cities: community psychobehavioral surveillance and related impact on outbreak control in Hong Kong and Singapore during the severe acute respiratory syndrome epidemic. *Infect. Control Hosp. Epidemiol. Off. J. Soc. Hosp. Epidemiol. Am.* **25**, 1033–1041 (2004).
64. Jones, K. E. *et al.* Global trends in emerging infectious diseases. *Nature* **451**, 990–993 (2008).

### 30 31 32 **Author Contributions**

33 Conceived the study: ARC, MICC, EAF. Oversaw data collection: MAF, EAF. Performed analyses: ARC, XZ,  
34 MAF. Wrote the paper: ARC, XZ, MAF, MICC, EAF.

### 38 39 **Additional Information**

#### 40 41 **Competing Interests**

42  
43 The authors declare no conflicts of interest.

#### 44 45 **Funding**

46  
47  
48 The work was funded by Singapore's National Medical Research Council, grant NMRC/H1N1R/005/2009,  
49 the Ministry of Health, Singapore, grant CDPHRG/0009/2014, and the Centre for Infectious Disease  
50 Epidemiology and Research. The funders had no role in study design, data collection and analysis,  
51 decision to publish, or preparation of the manuscript.  
52  
53  
54  
55  
56  
57  
58  
59  
60

1  
2  
3  
4  
5  
6  
7  
8  
9  
10  
11  
12  
13  
14  
15  
16  
17  
18  
19  
20  
21  
22  
23  
24  
25  
26  
27  
28  
29  
30  
31  
32  
33  
34  
35  
36  
37  
38  
39  
40  
41  
42  
43  
44  
45  
46  
47  
48  
49  
50  
51  
52  
53  
54  
55  
56  
57  
58  
59  
60

**Availability of data**

All data analysed during this study are included in this published article (Supplementary data 1 and 2).

For peer review only

## Figure captions

**Figure 1: Risk perceptions, support for interventions during infectious disease outbreaks and belief in their effectiveness among 500 adult Singapore residents.** Whiskers represent 95% confidence intervals.

(A) Estimates of risk of large outbreaks over the next 12mo in Singapore. (B, C) Support for mandatory isolation and quarantine in the event of an outbreak. A four-point Likert scale (strongly oppose, moderately oppose, moderately in favour, strongly in favour) is presented with stronger opinions to the left- and right-most extremes of the plot. (D) Belief in the effectiveness of, experience of, and support for the use of temperature screening. (E–H) Frequency of attendance at hawker centers (outdoor food courts), shopping malls (black), religious gatherings and festivals. Week/Month/Year stand for at least once a week/month/year. Within each frequency, the number reporting they would *not* reduce their attendance in the event of an outbreak is overlaid (white), excepting those who never attend such activities.

**Figure 2: Preference weights for policy scenario attributes, elicited by a discrete choice experiment.**

Overall (A) and in two subgroups (B, C) identified via hierarchical cluster analysis. Attribute levels with larger (positive) utilities are preferred to those with smaller (negative) utilities. The figure reflects estimated coefficients from the probit model, with the utilities for voluntary quarantine, voluntary isolation, no social distancing, no temperature screening, 200 infections and 0 deaths being set to 0. For panel (A), the utility for 180 deaths is set to  $-1$  for identifiability, all other utilities are therefore relative to it. Bars indicate 95% credible intervals. For panels (B, C), utilities are stratified posterior means from the Bayesian hierarchical model, and bars indicate 95% confidence intervals.

**Figure 3: Identification of distinct respondent preference classes among 500 adult Singapore residents using a hierarchical cluster analysis.** (A) A dendrogram of the hierarchical cluster analysis (Wald's method). The x-axis measures the closeness of either individual points or clusters. (B) A centroid plot

1  
2  
3 shows the first (LD1, x-axis) versus the second discriminant function (LD2, y-axis) from a two-group  
4  
5 linear discriminant analysis. (C) An elbow plot validates the number of clusters. The “elbow” on the line  
6  
7 is at two clusters.  
8  
9

10  
11 **Figure 4: Demographics of participants classified as expenditure averse (imperial red) and mortality**  
12  
13 **averse (navy blue).** Whiskers indicate 95% confidence intervals. NILF = Not in the labor force.  
14  
15

16  
17  
18  
19  
20  
21  
22  
23  
24  
25  
26  
27  
28  
29  
30  
31  
32  
33  
34  
35  
36  
37  
38  
39  
40  
41  
42  
43  
44  
45  
46  
47  
48  
49  
50  
51  
52  
53  
54  
55  
56  
57  
58  
59  
60

For peer review only

## Tables

Table 1: A typical pair of sets of options. In this example, the individual selected scenario A over scenario B.

|                                                              | Scenario A                                     | Scenario B                                                                                                         |
|--------------------------------------------------------------|------------------------------------------------|--------------------------------------------------------------------------------------------------------------------|
| Policy measures                                              |                                                |                                                                                                                    |
| Quarantine of potential cases                                | Mandatory                                      | Voluntary                                                                                                          |
| Isolation of actual cases                                    | Voluntary                                      | Mandatory                                                                                                          |
| Cancellation of mass gatherings                              | Closure of schools                             | Closure of schools and cancellation of other mass gatherings that involve more than 30 people in a single location |
| Temperature screening                                        | Only at border checkpoints                     | Only at border checkpoints                                                                                         |
| One-time fee to fund public health measures                  | S\$40                                          | S\$15                                                                                                              |
| Outcomes                                                     |                                                |                                                                                                                    |
| Expected number of infections                                | 500 cases<br>(1 in 10,000 people are infected) | 1,000,000 cases<br>(1 in 5 people are infected)                                                                    |
| Expected number of infection-related deaths                  | 0 deaths                                       | 120 deaths                                                                                                         |
| Choice                                                       |                                                |                                                                                                                    |
| If these were your only two options, which would you choose? | ✓                                              |                                                                                                                    |

Table 2: Attributes and levels used in the discrete choice experiment. Each set of options contained one level for each attribute.

| Attributes                                  | Levels                                                                                                                                                                                                                                            |
|---------------------------------------------|---------------------------------------------------------------------------------------------------------------------------------------------------------------------------------------------------------------------------------------------------|
| Quarantine of potential cases               | Voluntary / Mandatory                                                                                                                                                                                                                             |
| Isolation of actual cases                   | Voluntary / Mandatory                                                                                                                                                                                                                             |
| Cancellation of mass gatherings             | None / Closure of schools / Closure of schools and cancellation of other mass gatherings that involve more than 30 people in a single location                                                                                                    |
| Temperature screening                       | None / Only at border checkpoints / At border checkpoints and other sites within Singapore                                                                                                                                                        |
| One-time fee to fund public health measures | S\$15 / S\$20 / S\$40 / S\$50                                                                                                                                                                                                                     |
| Expected number of infections               | 200 cases (1 in 25,000 people are infected) /<br>500 cases (1 in 10,000 people are infected) /<br>1,000 cases (1 in 5,000 people are infected) /<br>10,000 cases (1 in 500 people are infected) /<br>1,000,000 cases (1 in 5 people are infected) |
| Expected number of infection-related deaths | 0 deaths / 30 deaths / 80 deaths / 120 deaths / 180 deaths                                                                                                                                                                                        |

Table 3: Demographic characteristics of sample (n=500) and population. Sample racial groups are self-declared. Census racial groups accord with national registration.

|                                 | Sample percentage (95% confidence interval) | Census 2010 percentage |
|---------------------------------|---------------------------------------------|------------------------|
| <b>Age</b>                      |                                             |                        |
| <40                             | 36.2 (32.0–40.4)                            | 39.9                   |
| 40–49                           | 26.4 (22.5–30.3)                            | 22.2                   |
| 50–59                           | 19.6 (16.1–23.1)                            | 19.3                   |
| 60+                             | 17.8 (14.4–21.2)                            | 18.6                   |
| <b>Gender</b>                   |                                             |                        |
| Male                            | 45.8 (41.4–50.2)                            | 48.8                   |
| Female                          | 54.2 (49.8–58.6)                            | 51.2                   |
| <b>Education</b>                |                                             |                        |
| Upper secondary school or lower | 54.8 (50.4–59.2)                            | 62.0                   |
| Polytechnic diploma or higher   | 45.2 (40.8–49.6)                            | 38.0                   |
| <b>Racial group</b>             |                                             |                        |
| Chinese                         | 72.8 (68.9–76.7)                            | 74.2                   |
| Indian                          | 9.6 (7.0–12.2)                              | 9.2                    |
| Malay                           | 13.0 (10.1–15.9)                            | 13.3                   |
| Other                           | 4.6 (2.8–6.4)                               | 3.3                    |
| <b>Employment status</b>        |                                             |                        |
| Employed                        | 65.0 (60.8–69.2)                            | 64.6                   |
| Unemployed                      | 3.2 (1.7–4.7)                               | 2.0                    |
| Not in labor force              | 31.8 (27.7–35.9)                            | 33.4                   |
| <b>Family status</b>            |                                             |                        |
| Without children                | 42.4 (38.1–46.7)                            | 44.0                   |
| With children                   | 57.6 (53.3–61.9)                            | 56.0                   |



Table 4: Willingness to pay to move between options. The willingness to pay figures indicate the cash amount (in Singapore dollars, at 2013 prices S\$1≈US\$0.80) required to make respondents indifferent between two neighbouring attribute levels, with arrows representing the direction in which the individual would be willing to pay to move. For instance, participants would pay \$13 (as revealed by their choices) to move from a voluntary to a mandatory quarantine policy.

| Attribute                       | Level     | WTP (95% CrI)               | Level                                    |
|---------------------------------|-----------|-----------------------------|------------------------------------------|
| Quarantine of potential cases   | Voluntary | \$15 (\$8, \$24)<br>—————→  | Mandatory                                |
| Isolation of actual cases       | Voluntary | \$8 (\$1, \$16)<br>—————→   | Mandatory                                |
| Cancellation of mass gatherings | None      | \$27 (\$14, \$48)<br>—————→ | School closure                           |
|                                 | None      | \$30 (\$17, \$51)<br>—————→ | School closure and other mass gatherings |
| Temperature screening           | None      | \$12 (\$2, \$26)<br>—————→  | At border                                |
|                                 | None      | \$21 (\$11, \$36)<br>—————→ | At border and other sites                |
| Number of infections            | 200       | N.S.                        | 500                                      |
|                                 | 200       | \$15 (\$4, \$29)<br>—————→  | 1 000                                    |
|                                 | 200       | N.S.                        | 10 000                                   |
|                                 | 200       | N.S.                        | 1 000 000                                |
| Number of deaths                | 0         | \$34 (\$19, \$58)<br>←————  | 30                                       |
|                                 | 0         | \$70 (\$45, \$112)<br>←———— | 80                                       |
|                                 | 0         | \$71 (\$49, \$109)<br>←———— | 120                                      |
|                                 | 0         | \$98 (\$69, \$148)<br>←———— | 180                                      |

N.S. Not significant as S\$0 included in the 95% credible interval.

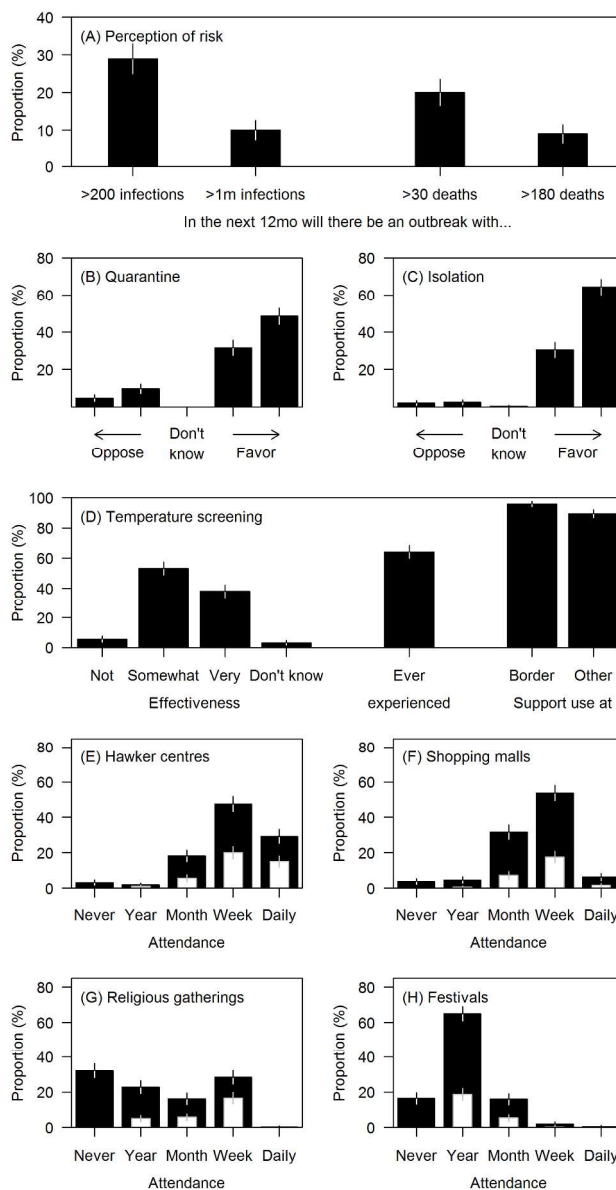

Figure 1: Risk perceptions, support for interventions during infectious disease outbreaks and belief in their effectiveness among 500 adult Singapore residents. Whiskers represent 95% confidence intervals. (A) Estimates of risk of large outbreaks over the next 12mo in Singapore. (B, C) Support for mandatory isolation and quarantine in the event of an outbreak. A four-point Likert scale (strongly oppose, moderately oppose, moderately in favour, strongly in favour) is presented with stronger opinions to the left- and right-most extremes of the plot. (D) Belief in the effectiveness of, experience of, and support for the use of temperature screening. (E–H) Frequency of attendance at hawker centers (outdoor food courts), shopping malls (black), religious gatherings and festivals. Week/Month/Year stand for at least once a week/month/year. Within each frequency, the number reporting they would not reduce their attendance in the event of an outbreak is overlaid (white), excepting those who never attend such activities.

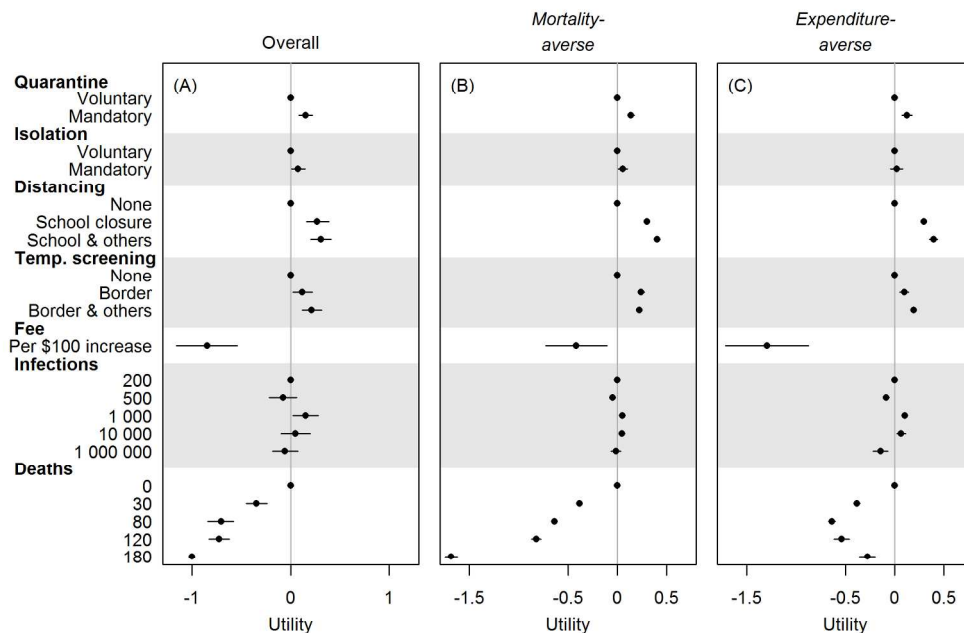

Figure 2: Preference weights for policy scenario attributes, elicited by a discrete choice experiment. Overall (A) and in two subgroups (B, C) identified via hierarchical cluster analysis. Attribute levels with larger (positive) utilities are preferred to those with smaller (negative) utilities. The figure reflects estimated coefficients from the probit model, with the utilities for voluntary quarantine, voluntary isolation, no social distancing, no temperature screening, 200 infections and 0 deaths being set to 0. For panel (A), the utility for 180 deaths is set to -1 for identifiability, all other utilities are therefore relative to it. Bars indicate 95% credible intervals. For panels (B, C), utilities are stratified posterior means from the Bayesian hierarchical model, and bars indicate 95% confidence intervals.

1  
2  
3  
4  
5  
6  
7  
8  
9  
10  
11  
12  
13  
14  
15  
16  
17  
18  
19  
20  
21  
22  
23  
24  
25  
26  
27  
28  
29  
30  
31  
32  
33  
34  
35  
36  
37  
38  
39  
40  
41  
42  
43  
44  
45  
46  
47  
48  
49  
50  
51  
52  
53  
54  
55  
56  
57  
58  
59  
60



Figure 3: Identification of distinct respondent preference classes among 500 adult Singapore residents using a hierarchical cluster analysis. (A) A dendrogram of the hierarchical cluster analysis (Wald's method). The x-axis measures the closeness of either individual points or clusters. (B) A centroid plot shows the first (LD1, x-axis) versus the second discriminant function (LD2, y-axis) from a two-group linear discriminant analysis. (C) An elbow plot validates the number of clusters. The "elbow" on the line is at two clusters.

1  
2  
3  
4  
5  
6  
7  
8  
9  
10  
11  
12  
13  
14  
15  
16  
17  
18  
19  
20  
21  
22  
23  
24  
25  
26  
27  
28  
29  
30  
31  
32  
33  
34  
35  
36  
37  
38  
39  
40  
41  
42  
43  
44  
45  
46  
47  
48  
49  
50  
51  
52  
53  
54  
55  
56  
57  
58  
59  
60

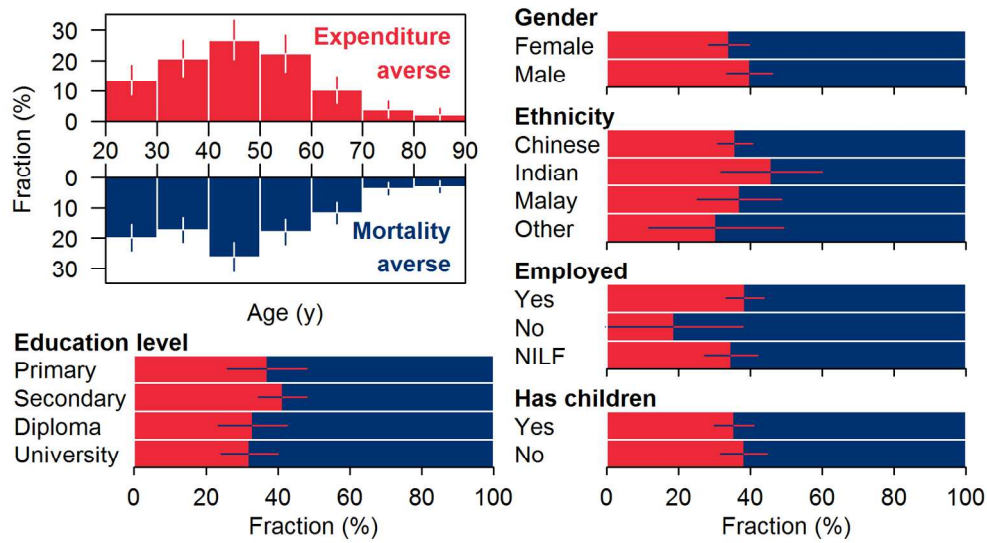

Figure 4: Demographics of participants classified as expenditure averse (imperial red) and mortality averse (navy blue). Whiskers indicate 95% confidence intervals. NILF = Not in the labor force.

review only

1  
2  
3 **Title: Public preferences for interventions to prevent emerging infectious disease threats: a discrete**  
4 **choice experiment - supplementary material**  
5  
6

7 **Authors (family names underlined):**

8 Alex R Cook\*, PhD<sup>1,2,3,4</sup>, Xiahong Zhao, BSc<sup>1</sup>, Mark IC Chen MBBS, MPH, PhD<sup>1,3</sup>, Eric A Finkelstein, PhD,  
9 MHA<sup>1,2</sup>  
10

11  
12 <sup>1</sup>Saw Swee Hock School of Public Health, National University of Singapore and National University Health  
13 System, Singapore, Singapore  
14

15 <sup>2</sup>Program in Health Services and Systems Research, Duke-NUS Graduate Medical School Singapore,  
16 Singapore, Singapore  
17

18 <sup>3</sup>Communicable Disease Centre, Tan Tock Seng Hospital, Singapore, Singapore  
19

20 <sup>4</sup>Department of Statistics and Applied Probability, National University of Singapore, Singapore,  
21 Singapore  
22

23 **Author for correspondence:**  
24

25 Dr Alex R Cook; alex.richard.cook@gmail.com; +65 83 69 60 91  
26

27 Saw Swee Hock School of Public Health, National University of Singapore, MD1, 12 Science Drive 2,  
28 Singapore 117549  
29

30 Alternative if Cook unavailable: Prof Eric Finkelstein; eric.finkelstein@duke-nus.edu.sg  
31  
32  
33  
34  
35  
36  
37  
38  
39  
40  
41  
42  
43  
44  
45  
46  
47  
48  
49  
50  
51  
52  
53  
54  
55  
56  
57  
58  
59  
60

**Table S1: Utility estimates under main model, all participants. 95% CrI is the 95% equal-tailed credible interval. The utility for all unlisted levels are set to 0. For the all-participant, the utility for 180 deaths is anchored to -1. For mortality-averse and expenditure-averse results, 95% CI is the 95% equal-tailed confidence interval for the posterior mean utility.**

| Attribute level                                          | Posterior mean | 95% CrI       | Attribute level      | Posterior mean | 95% CrI        |
|----------------------------------------------------------|----------------|---------------|----------------------|----------------|----------------|
| <b>All participants</b>                                  |                |               |                      |                |                |
| Mandatory quarantine                                     | 0.15           | (0.09,0.22)   | 500 infections       | -0.08          | (-0.22,0.06)   |
| Mandatory isolation                                      | 0.08           | (0.01,0.15)   | 1 000 infections     | 0.15           | (0.02,0.28)    |
| School closure                                           | 0.27           | (0.16,0.39)   | 10 000 infections    | 0.05           | (-0.10,0.20)   |
| School closure and cancellation of other mass gatherings | 0.31           | (0.21,0.41)   | 1 million infections | -0.06          | (-0.18,0.07)   |
| Screening at border                                      | 0.12           | (0.02,0.22)   | 30 deaths            | -0.35          | (-0.45,-0.24)  |
| Screening at border and other sites                      | 0.21           | (0.12,0.32)   | 80 deaths            | -0.71          | (-0.84,-0.58)  |
| Tax, per S\$100                                          | -0.84          | (-1.16,-0.54) | 120 deaths           | -0.72          | (-0.83,-0.62)  |
| Standard deviation                                       | 1.26           | (0.95,1.68)   | 180 deaths           | -1.00          | (-1.00,-1.00)  |
| <b>Mortality averse</b>                                  |                |               |                      |                |                |
| Attribute level                                          | Posterior mean | 95% CI        | Attribute level      | Posterior mean | 95% CI         |
| Mandatory quarantine                                     | 0.14           | (0.11, 0.17)  | 500 infections       | -0.04          | (-0.06, -0.03) |
| Mandatory isolation                                      | 0.06           | (0.01, 0.11)  | 1 000 infections     | 0.05           | (0.04, 0.07)   |
| School closure                                           | 0.30           | (0.29, 0.32)  | 10 000 infections    | 0.05           | (0.02, 0.08)   |
| School closure and cancellation of other mass gatherings | 0.41           | (0.38, 0.44)  | 1 million infections | -0.01          | (-0.06, 0.04)  |
| Screening at border                                      | 0.24           | (0.21, 0.27)  | 30 deaths            | -0.38          | (-0.40,-0.36)  |
| Screening at border and other sites                      | 0.22           | (0.21, 0.24)  | 80 deaths            | -0.64          | (-0.66,-0.61)  |
| Tax, per S\$100                                          | -0.41          | (-0.73,0.10)  | 120 deaths           | -0.82          | (-0.87,-0.77)  |
|                                                          |                |               | 180 deaths           | -1.68          | (-1.75,-1.62)  |
| <b>Expenditure averse</b>                                |                |               |                      |                |                |
| Mandatory quarantine                                     | 0.13           | (0.07, 0.18)  | 500 infections       | -0.08          | (-0.11, -0.06) |
| Mandatory isolation                                      | 0.02           | (-0.04,-0.09) | 1 000 infections     | 0.10           | (0.08, 0.13)   |
| School closure                                           | 0.30           | (0.27, 0.32)  | 10 000 infections    | 0.07           | (0.02, 0.11)   |
| School closure and cancellation of other mass gatherings | 0.40           | (0.35, 0.44)  | 1 million infections | -0.14          | (-0.22, -0.07) |
| Screening at border                                      | 0.10           | (0.06, 0.15)  | 30 deaths            | -0.38          | (-0.41, -0.35) |
| Screening at border and other sites                      | 0.19           | (0.17, 0.22)  | 80 deaths            | -0.64          | (-0.67, -0.60) |
| Tax, per S\$100                                          | -1.29          | (-1.72, 0.87) | 120 deaths           | -0.54          | (-0.62, -0.46) |
|                                                          |                |               | 180 deaths           | -0.28          | (-0.35, -0.20) |

Table S2: Utility estimates under variant model, all participants and subgroups. 95% CrI is the 95% equal-tailed credible interval. The utility for all unlisted levels are set to 0. For the all-participant, the utility for 180 deaths is anchored to -1.

| Attribute level                                          | Posterior mean | 95% CrI       | Attribute level      | Posterior mean | 95% CrI       |
|----------------------------------------------------------|----------------|---------------|----------------------|----------------|---------------|
| <b>All participants</b>                                  |                |               |                      |                |               |
| Mandatory quarantine                                     | 0.16           | (0.09,0.24)   | 500 infections       | -0.05          | (-0.19,0.10)  |
| Mandatory isolation                                      | 0.10           | (0.03,0.17)   | 1 000 infections     | 0.19           | (0.04,0.35)   |
| School closure                                           | 0.32           | (0.19,0.47)   | 10 000 infections    | 0.12           | (-0.05,0.33)  |
| School closure and cancellation of other mass gatherings | 0.29           | (0.18,0.41)   | 1 million infections | 0.02           | (-0.12,0.18)  |
| Screening at border                                      | 0.14           | (0.04,0.25)   | 30 deaths            | -0.38          | (-0.49,-0.26) |
| Screening at border and other sites                      | 0.18           | (0.07,0.29)   | 80 deaths            | -0.75          | (-0.92,-0.60) |
| S\$20 tax                                                | -0.22          | (-0.39,-0.08) | 120 deaths           | -0.76          | (-0.88,-0.65) |
| S\$30 tax                                                | -0.28          | (-0.39,-0.17) | 180 deaths           | -1.00          | (-1.00,-1.00) |
| S\$50 tax                                                | -0.34          | (-0.47,-0.21) | Standard deviation   | 1.38           | (1.00,1.93)   |



1  
2  
3 "CaseNo", "Age50", "Gender", "Education", "Race", "Employment", "WithChildren"  
4 166, FALSE, "Female", "low", "Chinese", "Not in labor force", TRUE  
5 162, TRUE, "Male", "low", "Chinese", "Not in labor force", FALSE  
6 163, FALSE, "Female", "low", "Chinese", "Employed", TRUE  
7 153, FALSE, "Female", "low", "Chinese", "Not in labor force", TRUE  
8 159, FALSE, "Female", "high", "Chinese", "Employed", FALSE  
9 184, TRUE, "Male", "low", "Malay", "Employed", TRUE  
10 185, TRUE, "Female", "low", "Malay", "Not in labor force", TRUE  
11 156, FALSE, "Male", "low", "Chinese", "Employed", TRUE  
12 155, FALSE, "Female", "low", "Chinese", "Employed", TRUE  
13 158, TRUE, "Female", "low", "Chinese", "Not in labor force", FALSE  
14 161, FALSE, "Female", "low", "Chinese", "Employed", TRUE  
15 164, TRUE, "Female", "low", "Chinese", "Not in labor force", FALSE  
16 165, FALSE, "Female", "high", "Chinese", "Employed", FALSE  
17 157, TRUE, "Male", "high", "Other", "Not in labor force", FALSE  
18 183, TRUE, "Female", "low", "Chinese", "Employed", TRUE  
19 198, TRUE, "Female", "low", "Indian", "Not in labor force", FALSE  
20 196, TRUE, "Female", "low", "Chinese", "Not in labor force", FALSE  
21 197, TRUE, "Female", "low", "Indian", "Employed", FALSE  
22 199, FALSE, "Female", "low", "Chinese", "Not in labor force", TRUE  
23 420, FALSE, "Male", "low", "Chinese", "Employed", TRUE  
24 194, FALSE, "Male", "high", "Chinese", "Not in labor force", FALSE  
25 192, TRUE, "Female", "low", "Chinese", "Employed", TRUE  
26 195, TRUE, "Female", "high", "Chinese", "Employed", FALSE  
27 200, FALSE, "Male", "low", "Chinese", "Not in labor force", FALSE  
28 421, TRUE, "Male", "high", "Indian", "Not in labor force", FALSE  
29 435, FALSE, "Male", "high", "Indian", "Employed", TRUE  
30 436, TRUE, "Female", "low", "Chinese", "Not in labor force", FALSE  
31 419, FALSE, "Male", "high", "Chinese", "Employed", FALSE  
32 463, FALSE, "Male", "high", "Chinese", "Not in labor force", FALSE  
33 316, FALSE, "Male", "low", "Chinese", "Not in labor force", FALSE  
34 273, FALSE, "Male", "high", "Chinese", "Employed", FALSE  
35 207, TRUE, "Female", "low", "Chinese", "Not in labor force", TRUE  
36 270, FALSE, "Female", "high", "Chinese", "Not in labor force", FALSE  
37 272, FALSE, "Male", "low", "Chinese", "Employed", TRUE  
38 289, TRUE, "Female", "low", "Chinese", "Not in labor force", FALSE  
39 243, TRUE, "Female", "high", "Chinese", "Employed", TRUE  
40 242, TRUE, "Male", "high", "Chinese", "Not in labor force", FALSE  
41 363, TRUE, "Female", "low", "Chinese", "Employed", FALSE  
42 360, TRUE, "Male", "low", "Chinese", "Unemployed", TRUE  
43 361, TRUE, "Female", "low", "Chinese", "Not in labor force", TRUE  
44 201, FALSE, "Male", "low", "Malay", "Unemployed", FALSE  
45 202, TRUE, "Female", "low", "Malay", "Not in labor force", FALSE  
46 214, FALSE, "Female", "high", "Chinese", "Employed", TRUE  
47 208, FALSE, "Male", "high", "Indian", "Employed", FALSE  
48 216, FALSE, "Male", "low", "Chinese", "Employed", TRUE  
49 205, FALSE, "Male", "low", "Other", "Employed", TRUE  
50 212, FALSE, "Female", "high", "Indian", "Not in labor force", TRUE  
51 206, FALSE, "Female", "low", "Chinese", "Employed", TRUE  
52 215, FALSE, "Male", "high", "Chinese", "Employed", TRUE  
53 217, FALSE, "Female", "low", "Malay", "Employed", FALSE  
54 148, TRUE, "Male", "low", "Malay", "Employed", TRUE  
55 141, FALSE, "Female", "high", "Chinese", "Not in labor force", TRUE  
56 152, TRUE, "Female", "low", "Other", "Not in labor force", FALSE  
57 147, FALSE, "Male", "low", "Malay", "Employed", TRUE  
58 146, FALSE, "Female", "high", "Chinese", "Employed", FALSE  
59 151, FALSE, "Male", "high", "Chinese", "Employed", FALSE  
60

1  
2  
3 211, FALSE, "Male", "high", "Chinese", "Employed", TRUE  
4 362, FALSE, "Female", "low", "Chinese", "Employed", TRUE  
5 359, TRUE, "Female", "low", "Chinese", "Not in labor force", TRUE  
6 143, FALSE, "Female", "high", "Chinese", "Employed", FALSE  
7 144, FALSE, "Female", "low", "Chinese", "Employed", FALSE  
8 150, FALSE, "Male", "low", "Malay", "Employed", TRUE  
9 142, TRUE, "Female", "low", "Chinese", "Employed", TRUE  
10 145, TRUE, "Female", "low", "Chinese", "Not in labor force", FALSE  
11 149, FALSE, "Female", "low", "Chinese", "Employed", TRUE  
12 209, TRUE, "Male", "low", "Chinese", "Unemployed", FALSE  
13 213, TRUE, "Male", "high", "Chinese", "Not in labor force", TRUE  
14 210, FALSE, "Male", "high", "Chinese", "Employed", TRUE  
15 204, FALSE, "Male", "high", "Indian", "Employed", TRUE  
16 203, FALSE, "Male", "high", "Indian", "Employed", TRUE  
17 20, FALSE, "Male", "low", "Chinese", "Employed", TRUE  
18 175, FALSE, "Male", "high", "Other", "Employed", TRUE  
19 17, FALSE, "Female", "high", "Chinese", "Employed", FALSE  
20 16, FALSE, "Male", "high", "Chinese", "Employed", TRUE  
21 14, FALSE, "Male", "low", "Chinese", "Not in labor force", FALSE  
22 18, FALSE, "Female", "high", "Indian", "Employed", TRUE  
23 15, FALSE, "Male", "low", "Chinese", "Employed", TRUE  
24 176, TRUE, "Female", "low", "Malay", "Employed", TRUE  
25 172, TRUE, "Female", "low", "Malay", "Unemployed", TRUE  
26 173, FALSE, "Male", "high", "Chinese", "Employed", FALSE  
27 171, FALSE, "Female", "high", "Chinese", "Employed", FALSE  
28 174, FALSE, "Male", "high", "Chinese", "Employed", TRUE  
29 19, FALSE, "Female", "low", "Malay", "Unemployed", TRUE  
30 170, FALSE, "Female", "low", "Indian", "Unemployed", TRUE  
31 178, FALSE, "Female", "high", "Chinese", "Employed", FALSE  
32 468, TRUE, "Female", "low", "Chinese", "Not in labor force", FALSE  
33 251, TRUE, "Male", "low", "Chinese", "Employed", TRUE  
34 258, FALSE, "Female", "high", "Other", "Employed", TRUE  
35 246, FALSE, "Female", "low", "Indian", "Employed", TRUE  
36 475, FALSE, "Female", "low", "Chinese", "Employed", TRUE  
37 439, FALSE, "Female", "low", "Indian", "Employed", FALSE  
38 247, FALSE, "Female", "low", "Malay", "Employed", TRUE  
39 248, TRUE, "Female", "low", "Malay", "Not in labor force", FALSE  
40 255, FALSE, "Female", "high", "Chinese", "Employed", TRUE  
41 254, FALSE, "Female", "low", "Chinese", "Not in labor force", TRUE  
42 465, FALSE, "Female", "high", "Chinese", "Employed", FALSE  
43 471, FALSE, "Male", "high", "Chinese", "Employed", FALSE  
44 252, TRUE, "Female", "low", "Chinese", "Employed", FALSE  
45 470, FALSE, "Male", "low", "Indian", "Employed", TRUE  
46 474, TRUE, "Female", "low", "Chinese", "Employed", TRUE  
47 257, TRUE, "Female", "low", "Chinese", "Not in labor force", FALSE  
48 467, FALSE, "Male", "high", "Chinese", "Unemployed", FALSE  
49 473, FALSE, "Female", "low", "Malay", "Unemployed", TRUE  
50 241, TRUE, "Female", "low", "Chinese", "Not in labor force", TRUE  
51 256, FALSE, "Male", "low", "Chinese", "Employed", TRUE  
52 250, TRUE, "Female", "low", "Chinese", "Employed", TRUE  
53 249, FALSE, "Female", "low", "Chinese", "Employed", TRUE  
54 469, FALSE, "Female", "low", "Malay", "Employed", TRUE  
55 253, FALSE, "Male", "low", "Malay", "Employed", TRUE  
56 466, FALSE, "Female", "high", "Chinese", "Employed", TRUE  
57 224, TRUE, "Female", "low", "Malay", "Employed", TRUE  
58 219, TRUE, "Female", "low", "Chinese", "Employed", TRUE  
59 226, TRUE, "Female", "low", "Malay", "Not in labor force", FALSE  
60

1  
2  
3 222, FALSE, "Male", "high", "Chinese", "Employed", TRUE  
4 227, TRUE, "Female", "low", "Chinese", "Employed", TRUE  
5 225, FALSE, "Male", "low", "Malay", "Employed", FALSE  
6 228, FALSE, "Female", "high", "Malay", "Employed", TRUE  
7 218, FALSE, "Female", "low", "Indian", "Employed", TRUE  
8 232, FALSE, "Female", "high", "Chinese", "Employed", TRUE  
9 229, FALSE, "Male", "high", "Chinese", "Employed", TRUE  
10 223, TRUE, "Male", "low", "Chinese", "Employed", TRUE  
11 231, TRUE, "Female", "low", "Chinese", "Employed", TRUE  
12 220, TRUE, "Male", "low", "Malay", "Employed", TRUE  
13 230, FALSE, "Male", "high", "Chinese", "Employed", TRUE  
14 221, TRUE, "Male", "low", "Indian", "Employed", TRUE  
15 182, TRUE, "Male", "low", "Chinese", "Not in labor force", TRUE  
16 160, FALSE, "Female", "low", "Chinese", "Employed", TRUE  
17 186, FALSE, "Male", "high", "Chinese", "Employed", TRUE  
18 27, FALSE, "Male", "high", "Indian", "Employed", FALSE  
19 26, TRUE, "Male", "low", "Chinese", "Not in labor force", FALSE  
20 386, TRUE, "Female", "low", "Chinese", "Not in labor force", FALSE  
21 169, TRUE, "Male", "low", "Chinese", "Employed", TRUE  
22 167, TRUE, "Female", "high", "Chinese", "Employed", FALSE  
23 154, FALSE, "Female", "high", "Chinese", "Employed", TRUE  
24 168, FALSE, "Female", "high", "Chinese", "Employed", FALSE  
25 193, FALSE, "Female", "low", "Indian", "Unemployed", FALSE  
26 187, FALSE, "Male", "high", "Chinese", "Employed", FALSE  
27 188, FALSE, "Female", "low", "Chinese", "Employed", TRUE  
28 315, TRUE, "Female", "high", "Chinese", "Not in labor force", TRUE  
29 314, TRUE, "Female", "low", "Chinese", "Not in labor force", TRUE  
30 472, FALSE, "Female", "high", "Chinese", "Employed", FALSE  
31 364, FALSE, "Male", "high", "Chinese", "Not in labor force", FALSE  
32 340, FALSE, "Male", "high", "Chinese", "Not in labor force", TRUE  
33 343, FALSE, "Male", "high", "Chinese", "Not in labor force", FALSE  
34 338, FALSE, "Male", "high", "Chinese", "Not in labor force", FALSE  
35 371, FALSE, "Male", "high", "Chinese", "Employed", FALSE  
36 375, FALSE, "Male", "high", "Chinese", "Employed", FALSE  
37 365, FALSE, "Female", "low", "Chinese", "Not in labor force", FALSE  
38 373, FALSE, "Male", "high", "Chinese", "Employed", FALSE  
39 366, FALSE, "Male", "high", "Chinese", "Not in labor force", FALSE  
40 43, FALSE, "Male", "low", "Chinese", "Employed", FALSE  
41 50, FALSE, "Female", "high", "Chinese", "Employed", TRUE  
42 308, FALSE, "Female", "low", "Chinese", "Employed", FALSE  
43 51, TRUE, "Female", "low", "Chinese", "Employed", TRUE  
44 48, FALSE, "Female", "high", "Chinese", "Not in labor force", TRUE  
45 49, TRUE, "Female", "low", "Chinese", "Not in labor force", TRUE  
46 42, TRUE, "Male", "low", "Malay", "Employed", TRUE  
47 46, FALSE, "Male", "high", "Chinese", "Employed", FALSE  
48 47, FALSE, "Male", "low", "Chinese", "Employed", TRUE  
49 45, FALSE, "Female", "low", "Chinese", "Not in labor force", TRUE  
50 52, FALSE, "Male", "high", "Chinese", "Employed", TRUE  
51 40, TRUE, "Male", "low", "Chinese", "Not in labor force", FALSE  
52 53, FALSE, "Male", "high", "Chinese", "Employed", FALSE  
53 44, FALSE, "Female", "high", "Chinese", "Employed", TRUE  
54 41, FALSE, "Female", "low", "Chinese", "Employed", TRUE  
55 58, FALSE, "Male", "high", "Other", "Employed", TRUE  
56 12, TRUE, "Male", "low", "Indian", "Employed", TRUE  
57 54, FALSE, "Female", "low", "Chinese", "Employed", FALSE  
58 56, FALSE, "Female", "high", "Chinese", "Employed", TRUE  
59 11, FALSE, "Female", "high", "Chinese", "Employed", TRUE  
60

1  
2  
3 483, FALSE, "Female", "high", "Other", "Employed", FALSE  
4 482, TRUE, "Female", "high", "Chinese", "Not in labor force", FALSE  
5 485, FALSE, "Male", "high", "Chinese", "Employed", TRUE  
6 480, FALSE, "Male", "high", "Chinese", "Employed", TRUE  
7 479, TRUE, "Male", "high", "Chinese", "Employed", TRUE  
8 69, FALSE, "Male", "low", "Chinese", "Not in labor force", FALSE  
9 57, FALSE, "Female", "low", "Chinese", "Not in labor force", TRUE  
10 55, FALSE, "Male", "high", "Indian", "Employed", FALSE  
11 13, FALSE, "Male", "high", "Chinese", "Employed", FALSE  
12 59, FALSE, "Female", "high", "Chinese", "Employed", FALSE  
13 70, FALSE, "Male", "low", "Chinese", "Employed", FALSE  
14 71, TRUE, "Male", "low", "Chinese", "Employed", FALSE  
15 73, FALSE, "Female", "low", "Indian", "Employed", TRUE  
16 74, FALSE, "Female", "high", "Chinese", "Unemployed", FALSE  
17 190, FALSE, "Male", "high", "Chinese", "Employed", FALSE  
18 75, FALSE, "Female", "high", "Chinese", "Employed", FALSE  
19 76, FALSE, "Female", "high", "Chinese", "Employed", TRUE  
20 77, TRUE, "Male", "low", "Chinese", "Employed", TRUE  
21 78, FALSE, "Male", "high", "Other", "Employed", FALSE  
22 189, FALSE, "Female", "low", "Malay", "Employed", FALSE  
23 72, FALSE, "Female", "low", "Chinese", "Employed", TRUE  
24 95, FALSE, "Female", "low", "Chinese", "Employed", FALSE  
25 191, FALSE, "Female", "low", "Chinese", "Employed", TRUE  
26 79, FALSE, "Male", "low", "Chinese", "Not in labor force", FALSE  
27 80, FALSE, "Male", "high", "Chinese", "Not in labor force", FALSE  
28 417, FALSE, "Male", "high", "Chinese", "Employed", FALSE  
29 416, FALSE, "Male", "high", "Indian", "Employed", TRUE  
30 381, TRUE, "Female", "low", "Chinese", "Not in labor force", TRUE  
31 390, FALSE, "Male", "high", "Chinese", "Not in labor force", FALSE  
32 391, FALSE, "Male", "low", "Malay", "Employed", FALSE  
33 389, FALSE, "Female", "low", "Malay", "Not in labor force", TRUE  
34 380, TRUE, "Female", "low", "Chinese", "Not in labor force", TRUE  
35 382, FALSE, "Female", "low", "Chinese", "Not in labor force", TRUE  
36 383, FALSE, "Female", "low", "Malay", "Employed", TRUE  
37 384, TRUE, "Female", "low", "Chinese", "Not in labor force", TRUE  
38 385, TRUE, "Female", "low", "Chinese", "Not in labor force", FALSE  
39 388, TRUE, "Male", "low", "Chinese", "Not in labor force", FALSE  
40 378, TRUE, "Female", "low", "Chinese", "Not in labor force", TRUE  
41 379, FALSE, "Male", "low", "Malay", "Employed", FALSE  
42 392, FALSE, "Male", "low", "Malay", "Employed", TRUE  
43 412, TRUE, "Female", "low", "Chinese", "Not in labor force", TRUE  
44 413, TRUE, "Female", "low", "Chinese", "Not in labor force", TRUE  
45 415, FALSE, "Female", "high", "Chinese", "Employed", FALSE  
46 414, FALSE, "Male", "high", "Chinese", "Employed", FALSE  
47 411, FALSE, "Female", "low", "Chinese", "Not in labor force", TRUE  
48 297, TRUE, "Female", "low", "Indian", "Not in labor force", TRUE  
49 300, FALSE, "Male", "high", "Chinese", "Not in labor force", FALSE  
50 299, FALSE, "Male", "low", "Malay", "Employed", TRUE  
51 298, FALSE, "Female", "low", "Malay", "Unemployed", TRUE  
52 303, FALSE, "Male", "high", "Other", "Employed", TRUE  
53 292, TRUE, "Female", "low", "Chinese", "Employed", TRUE  
54 301, TRUE, "Female", "low", "Indian", "Not in labor force", TRUE  
55 290, FALSE, "Male", "low", "Chinese", "Not in labor force", FALSE  
56 484, TRUE, "Male", "low", "Chinese", "Employed", TRUE  
57 291, TRUE, "Male", "low", "Malay", "Not in labor force", FALSE  
58 476, FALSE, "Male", "high", "Chinese", "Employed", TRUE  
59 244, FALSE, "Female", "high", "Chinese", "Employed", TRUE  
60

1  
2  
3 477, TRUE, "Female", "low", "Chinese", "Not in labor force", FALSE  
4 245, FALSE, "Female", "high", "Chinese", "Employed", TRUE  
5 481, FALSE, "Female", "high", "Chinese", "Employed", TRUE  
6 407, FALSE, "Female", "low", "Chinese", "Not in labor force", FALSE  
7 486, TRUE, "Female", "low", "Malay", "Employed", FALSE  
8 312, TRUE, "Male", "low", "Chinese", "Not in labor force", FALSE  
9 310, FALSE, "Female", "high", "Chinese", "Employed", FALSE  
10 487, TRUE, "Male", "high", "Chinese", "Employed", TRUE  
11 304, FALSE, "Male", "low", "Malay", "Employed", FALSE  
12 406, FALSE, "Female", "high", "Indian", "Not in labor force", TRUE  
13 377, TRUE, "Female", "low", "Chinese", "Employed", TRUE  
14 311, FALSE, "Female", "high", "Chinese", "Employed", TRUE  
15 309, FALSE, "Female", "high", "Chinese", "Employed", FALSE  
16 488, FALSE, "Male", "high", "Chinese", "Not in labor force", FALSE  
17 489, TRUE, "Female", "low", "Chinese", "Not in labor force", TRUE  
18 490, FALSE, "Male", "low", "Indian", "Employed", FALSE  
19 493, FALSE, "Female", "high", "Indian", "Not in labor force", TRUE  
20 494, TRUE, "Female", "low", "Chinese", "Not in labor force", TRUE  
21 235, FALSE, "Male", "low", "Malay", "Employed", TRUE  
22 345, FALSE, "Female", "high", "Indian", "Employed", TRUE  
23 234, FALSE, "Female", "high", "Chinese", "Employed", TRUE  
24 236, TRUE, "Male", "high", "Chinese", "Employed", TRUE  
25 237, FALSE, "Male", "high", "Chinese", "Employed", TRUE  
26 349, FALSE, "Female", "low", "Chinese", "Employed", TRUE  
27 344, FALSE, "Male", "high", "Chinese", "Employed", TRUE  
28 352, FALSE, "Male", "low", "Chinese", "Employed", TRUE  
29 346, FALSE, "Female", "high", "Malay", "Not in labor force", FALSE  
30 350, TRUE, "Male", "low", "Chinese", "Not in labor force", FALSE  
31 353, FALSE, "Female", "low", "Chinese", "Employed", FALSE  
32 440, FALSE, "Female", "low", "Malay", "Employed", TRUE  
33 351, FALSE, "Male", "high", "Malay", "Employed", FALSE  
34 348, FALSE, "Female", "low", "Chinese", "Employed", TRUE  
35 347, FALSE, "Female", "high", "Chinese", "Employed", TRUE  
36 34, TRUE, "Male", "low", "Chinese", "Not in labor force", TRUE  
37 32, TRUE, "Female", "low", "Indian", "Not in labor force", TRUE  
38 37, TRUE, "Female", "low", "Chinese", "Not in labor force", FALSE  
39 38, FALSE, "Male", "high", "Chinese", "Employed", TRUE  
40 33, FALSE, "Female", "high", "Chinese", "Unemployed", FALSE  
41 454, FALSE, "Male", "high", "Indian", "Employed", TRUE  
42 458, FALSE, "Male", "low", "Indian", "Employed", TRUE  
43 39, TRUE, "Female", "low", "Chinese", "Employed", TRUE  
44 35, FALSE, "Male", "low", "Chinese", "Employed", FALSE  
45 36, FALSE, "Male", "high", "Chinese", "Employed", FALSE  
46 327, FALSE, "Female", "high", "Indian", "Employed", TRUE  
47 328, FALSE, "Male", "high", "Other", "Employed", TRUE  
48 370, FALSE, "Female", "high", "Indian", "Employed", TRUE  
49 368, TRUE, "Female", "low", "Chinese", "Employed", FALSE  
50 456, FALSE, "Male", "high", "Chinese", "Not in labor force", FALSE  
51 438, TRUE, "Male", "low", "Chinese", "Not in labor force", TRUE  
52 408, TRUE, "Male", "low", "Chinese", "Not in labor force", FALSE  
53 357, TRUE, "Female", "high", "Chinese", "Employed", FALSE  
54 356, TRUE, "Male", "high", "Chinese", "Not in labor force", FALSE  
55 441, TRUE, "Female", "low", "Chinese", "Not in labor force", FALSE  
56 358, FALSE, "Female", "high", "Chinese", "Employed", FALSE  
57 341, FALSE, "Female", "high", "Indian", "Employed", TRUE  
58 355, TRUE, "Male", "low", "Chinese", "Not in labor force", FALSE  
59 233, TRUE, "Female", "high", "Chinese", "Not in labor force", TRUE  
60

1  
2  
3 354, FALSE, "Female", "low", "Chinese", "Employed", FALSE  
4 457, FALSE, "Male", "high", "Chinese", "Employed", FALSE  
5 404, TRUE, "Male", "high", "Chinese", "Employed", TRUE  
6 403, TRUE, "Female", "high", "Chinese", "Employed", TRUE  
7 369, FALSE, "Male", "high", "Chinese", "Employed", FALSE  
8 455, FALSE, "Female", "low", "Chinese", "Not in labor force", TRUE  
9 60, FALSE, "Female", "high", "Chinese", "Not in labor force", FALSE  
10 7, FALSE, "Male", "high", "Chinese", "Employed", TRUE  
11 62, FALSE, "Male", "low", "Chinese", "Employed", TRUE  
12 4, TRUE, "Male", "low", "Chinese", "Not in labor force", FALSE  
13 63, FALSE, "Female", "low", "Indian", "Employed", TRUE  
14 422, TRUE, "Female", "high", "Chinese", "Employed", TRUE  
15 68, TRUE, "Female", "low", "Chinese", "Not in labor force", FALSE  
16 423, TRUE, "Male", "low", "Chinese", "Employed", TRUE  
17 306, TRUE, "Female", "low", "Other", "Not in labor force", FALSE  
18 376, TRUE, "Female", "high", "Chinese", "Employed", FALSE  
19 305, TRUE, "Male", "low", "Chinese", "Not in labor force", FALSE  
20 409, TRUE, "Male", "low", "Chinese", "Not in labor force", TRUE  
21 410, FALSE, "Female", "low", "Chinese", "Employed", TRUE  
22 461, TRUE, "Male", "low", "Chinese", "Employed", FALSE  
23 437, FALSE, "Male", "high", "Chinese", "Not in labor force", FALSE  
24 451, FALSE, "Female", "low", "Malay", "Not in labor force", FALSE  
25 446, FALSE, "Female", "low", "Chinese", "Not in labor force", TRUE  
26 320, FALSE, "Male", "low", "Malay", "Employed", FALSE  
27 449, FALSE, "Female", "high", "Chinese", "Employed", FALSE  
28 450, FALSE, "Male", "high", "Chinese", "Employed", FALSE  
29 448, FALSE, "Female", "low", "Chinese", "Not in labor force", TRUE  
30 447, FALSE, "Female", "low", "Chinese", "Employed", TRUE  
31 405, FALSE, "Male", "high", "Chinese", "Employed", TRUE  
32 453, FALSE, "Male", "high", "Chinese", "Employed", FALSE  
33 443, TRUE, "Female", "high", "Chinese", "Employed", TRUE  
34 3, FALSE, "Female", "high", "Chinese", "Employed", TRUE  
35 81, TRUE, "Male", "high", "Malay", "Employed", FALSE  
36 317, FALSE, "Male", "high", "Malay", "Employed", TRUE  
37 322, FALSE, "Female", "low", "Chinese", "Employed", TRUE  
38 321, TRUE, "Male", "low", "Malay", "Not in labor force", TRUE  
39 1, FALSE, "Female", "low", "Other", "Not in labor force", TRUE  
40 324, FALSE, "Male", "low", "Chinese", "Employed", TRUE  
41 323, FALSE, "Male", "low", "Chinese", "Employed", TRUE  
42 325, FALSE, "Male", "high", "Chinese", "Not in labor force", FALSE  
43 2, TRUE, "Male", "high", "Chinese", "Employed", TRUE  
44 313, TRUE, "Female", "high", "Malay", "Employed", TRUE  
45 318, TRUE, "Male", "low", "Chinese", "Employed", TRUE  
46 319, TRUE, "Male", "low", "Chinese", "Employed", TRUE  
47 326, FALSE, "Male", "high", "Chinese", "Unemployed", FALSE  
48 307, TRUE, "Male", "high", "Chinese", "Employed", TRUE  
49 278, TRUE, "Female", "high", "Chinese", "Employed", TRUE  
50 283, FALSE, "Male", "high", "Chinese", "Employed", TRUE  
51 279, TRUE, "Female", "high", "Chinese", "Employed", TRUE  
52 329, FALSE, "Female", "low", "Malay", "Not in labor force", TRUE  
53 332, FALSE, "Male", "high", "Other", "Employed", TRUE  
54 337, FALSE, "Male", "high", "Chinese", "Not in labor force", TRUE  
55 336, FALSE, "Male", "high", "Chinese", "Employed", TRUE  
56 335, FALSE, "Female", "low", "Malay", "Employed", TRUE  
57 333, FALSE, "Female", "low", "Malay", "Employed", TRUE  
58 334, FALSE, "Male", "high", "Other", "Not in labor force", FALSE  
59 282, FALSE, "Male", "low", "Chinese", "Employed", TRUE  
60

1  
2  
3 276, TRUE, "Male", "low", "Chinese", "Not in labor force", FALSE  
4 284, FALSE, "Female", "high", "Other", "Employed", FALSE  
5 275, FALSE, "Female", "low", "Chinese", "Employed", FALSE  
6 274, TRUE, "Female", "low", "Chinese", "Not in labor force", FALSE  
7 331, FALSE, "Female", "high", "Chinese", "Employed", TRUE  
8 330, FALSE, "Female", "high", "Indian", "Employed", TRUE  
9 281, FALSE, "Female", "high", "Chinese", "Employed", TRUE  
10 280, FALSE, "Female", "high", "Chinese", "Not in labor force", FALSE  
11 277, FALSE, "Female", "high", "Chinese", "Employed", FALSE  
12 496, FALSE, "Male", "high", "Chinese", "Employed", FALSE  
13 492, FALSE, "Male", "low", "Chinese", "Not in labor force", FALSE  
14 497, TRUE, "Female", "low", "Chinese", "Not in labor force", TRUE  
15 491, FALSE, "Male", "high", "Chinese", "Employed", TRUE  
16 495, FALSE, "Male", "high", "Chinese", "Employed", FALSE  
17 96, FALSE, "Male", "low", "Other", "Employed", FALSE  
18 97, TRUE, "Female", "low", "Chinese", "Not in labor force", TRUE  
19 98, FALSE, "Female", "low", "Chinese", "Not in labor force", TRUE  
20 99, FALSE, "Male", "high", "Chinese", "Not in labor force", FALSE  
21 100, FALSE, "Female", "low", "Chinese", "Employed", FALSE  
22 101, FALSE, "Female", "low", "Chinese", "Employed", FALSE  
23 102, TRUE, "Female", "low", "Malay", "Employed", FALSE  
24 103, TRUE, "Female", "high", "Chinese", "Employed", TRUE  
25 104, FALSE, "Female", "high", "Chinese", "Employed", FALSE  
26 105, TRUE, "Male", "low", "Chinese", "Employed", TRUE  
27 445, FALSE, "Male", "high", "Chinese", "Employed", FALSE  
28 478, TRUE, "Female", "low", "Chinese", "Not in labor force", TRUE  
29 444, TRUE, "Female", "high", "Chinese", "Employed", TRUE  
30 442, TRUE, "Male", "low", "Chinese", "Employed", TRUE  
31 452, FALSE, "Female", "low", "Chinese", "Employed", TRUE  
32 262, FALSE, "Female", "low", "Other", "Employed", FALSE  
33 464, TRUE, "Female", "high", "Chinese", "Employed", TRUE  
34 271, FALSE, "Female", "high", "Chinese", "Employed", FALSE  
35 259, FALSE, "Male", "high", "Chinese", "Employed", TRUE  
36 265, FALSE, "Female", "high", "Chinese", "Not in labor force", TRUE  
37 287, FALSE, "Female", "high", "Chinese", "Employed", FALSE  
38 459, FALSE, "Female", "high", "Chinese", "Employed", FALSE  
39 288, TRUE, "Female", "low", "Chinese", "Not in labor force", TRUE  
40 266, FALSE, "Male", "high", "Malay", "Employed", TRUE  
41 260, FALSE, "Female", "high", "Indian", "Employed", TRUE  
42 418, FALSE, "Female", "high", "Malay", "Employed", TRUE  
43 460, FALSE, "Male", "low", "Chinese", "Employed", FALSE  
44 263, TRUE, "Female", "low", "Chinese", "Not in labor force", TRUE  
45 302, TRUE, "Male", "low", "Chinese", "Employed", FALSE  
46 264, TRUE, "Female", "low", "Indian", "Not in labor force", TRUE  
47 261, TRUE, "Female", "low", "Chinese", "Not in labor force", TRUE  
48 285, FALSE, "Male", "low", "Chinese", "Employed", TRUE  
49 296, FALSE, "Male", "low", "Chinese", "Employed", TRUE  
50 293, TRUE, "Male", "high", "Chinese", "Employed", TRUE  
51 286, FALSE, "Female", "low", "Chinese", "Employed", FALSE  
52 394, TRUE, "Male", "low", "Chinese", "Not in labor force", FALSE  
53 396, TRUE, "Female", "low", "Chinese", "Not in labor force", FALSE  
54 498, TRUE, "Male", "low", "Chinese", "Not in labor force", TRUE  
55 294, FALSE, "Male", "high", "Chinese", "Employed", TRUE  
56 432, TRUE, "Female", "low", "Chinese", "Not in labor force", TRUE  
57 393, TRUE, "Female", "high", "Chinese", "Employed", TRUE  
58 500, FALSE, "Female", "low", "Chinese", "Not in labor force", TRUE  
59 429, TRUE, "Male", "low", "Malay", "Employed", TRUE  
60

1  
2  
3 398, TRUE, "Male", "high", "Chinese", "Not in labor force", TRUE  
4 400, TRUE, "Female", "high", "Chinese", "Employed", FALSE  
5 430, FALSE, "Male", "low", "Chinese", "Unemployed", FALSE  
6 499, TRUE, "Male", "low", "Chinese", "Not in labor force", FALSE  
7 402, FALSE, "Male", "high", "Chinese", "Employed", FALSE  
8 431, FALSE, "Male", "high", "Indian", "Employed", TRUE  
9 399, TRUE, "Male", "high", "Chinese", "Not in labor force", FALSE  
10 22, FALSE, "Female", "low", "Chinese", "Not in labor force", FALSE  
11 25, TRUE, "Female", "low", "Chinese", "Not in labor force", TRUE  
12 21, FALSE, "Female", "high", "Chinese", "Employed", FALSE  
13 24, FALSE, "Female", "high", "Other", "Employed", TRUE  
14 23, TRUE, "Male", "low", "Chinese", "Employed", TRUE  
15 116, FALSE, "Male", "high", "Other", "Employed", TRUE  
16 117, FALSE, "Female", "low", "Chinese", "Employed", FALSE  
17 118, TRUE, "Male", "low", "Chinese", "Not in labor force", FALSE  
18 119, FALSE, "Female", "low", "Malay", "Employed", TRUE  
19 120, TRUE, "Female", "low", "Other", "Not in labor force", TRUE  
20 121, FALSE, "Female", "high", "Chinese", "Employed", FALSE  
21 122, FALSE, "Male", "high", "Other", "Employed", TRUE  
22 123, FALSE, "Male", "high", "Chinese", "Employed", FALSE  
23 124, FALSE, "Male", "low", "Other", "Unemployed", TRUE  
24 125, FALSE, "Female", "high", "Chinese", "Employed", FALSE  
25 126, FALSE, "Male", "high", "Chinese", "Employed", TRUE  
26 127, TRUE, "Female", "high", "Chinese", "Employed", TRUE  
27 128, TRUE, "Female", "low", "Malay", "Employed", TRUE  
28 129, FALSE, "Female", "high", "Indian", "Not in labor force", TRUE  
29 130, FALSE, "Male", "low", "Chinese", "Employed", FALSE  
30 131, FALSE, "Male", "high", "Chinese", "Employed", TRUE  
31 132, FALSE, "Male", "low", "Chinese", "Employed", TRUE  
32 133, FALSE, "Male", "low", "Malay", "Employed", FALSE  
33 134, FALSE, "Male", "low", "Chinese", "Employed", FALSE  
34 135, FALSE, "Male", "low", "Chinese", "Employed", FALSE  
35 136, FALSE, "Female", "high", "Indian", "Employed", TRUE  
36 137, FALSE, "Female", "high", "Chinese", "Employed", TRUE  
37 138, FALSE, "Male", "high", "Malay", "Employed", FALSE  
38 139, FALSE, "Male", "high", "Malay", "Employed", FALSE  
39 140, TRUE, "Male", "low", "Malay", "Employed", TRUE  
40 374, FALSE, "Female", "high", "Chinese", "Not in labor force", FALSE  
41 372, TRUE, "Female", "high", "Chinese", "Not in labor force", TRUE  
42 342, FALSE, "Female", "high", "Chinese", "Not in labor force", FALSE  
43 367, FALSE, "Female", "low", "Chinese", "Not in labor force", TRUE  
44 339, FALSE, "Female", "high", "Chinese", "Employed", FALSE  
45 61, FALSE, "Male", "high", "Chinese", "Not in labor force", FALSE  
46 67, FALSE, "Male", "high", "Chinese", "Employed", TRUE  
47 64, TRUE, "Female", "low", "Chinese", "Not in labor force", TRUE  
48 6, TRUE, "Male", "high", "Chinese", "Employed", TRUE  
49 10, TRUE, "Female", "low", "Chinese", "Not in labor force", TRUE  
50 8, TRUE, "Male", "low", "Malay", "Employed", TRUE  
51 9, TRUE, "Female", "low", "Malay", "Employed", TRUE  
52 5, FALSE, "Female", "low", "Malay", "Employed", FALSE  
53 65, FALSE, "Male", "high", "Chinese", "Not in labor force", FALSE  
54 66, FALSE, "Male", "high", "Chinese", "Employed", FALSE  
55 395, TRUE, "Male", "low", "Chinese", "Employed", FALSE  
56 181, FALSE, "Male", "high", "Indian", "Employed", FALSE  
57 177, TRUE, "Male", "low", "Chinese", "Not in labor force", TRUE  
58 397, TRUE, "Female", "low", "Chinese", "Employed", TRUE  
59 179, FALSE, "Female", "high", "Chinese", "Employed", TRUE  
60



1  
2  
3 82, FALSE, "Female", "high", "Chinese", "Employed", TRUE  
4 239, FALSE, "Male", "low", "Malay", "Employed", TRUE  
5 83, FALSE, "Male", "high", "Chinese", "Employed", TRUE  
6 267, FALSE, "Female", "low", "Chinese", "Not in labor force", TRUE  
7 240, FALSE, "Female", "low", "Indian", "Not in labor force", FALSE  
8 84, FALSE, "Female", "high", "Indian", "Employed", FALSE  
9 269, TRUE, "Male", "low", "Chinese", "Not in labor force", TRUE  
10 85, TRUE, "Female", "low", "Chinese", "Not in labor force", TRUE  
11 86, FALSE, "Male", "low", "Chinese", "Employed", FALSE  
12 295, TRUE, "Male", "high", "Chinese", "Employed", TRUE  
13 87, FALSE, "Female", "high", "Chinese", "Employed", TRUE  
14 238, TRUE, "Female", "low", "Chinese", "Employed", TRUE  
15 88, FALSE, "Female", "high", "Indian", "Employed", FALSE  
16 89, TRUE, "Female", "low", "Chinese", "Not in labor force", TRUE  
17 268, FALSE, "Male", "high", "Other", "Employed", TRUE  
18 106, FALSE, "Female", "high", "Chinese", "Not in labor force", TRUE  
19 107, FALSE, "Male", "high", "Chinese", "Employed", FALSE  
20 108, FALSE, "Male", "high", "Chinese", "Employed", TRUE  
21 109, FALSE, "Female", "high", "Indian", "Employed", TRUE  
22 110, FALSE, "Male", "low", "Malay", "Employed", TRUE  
23 111, FALSE, "Female", "low", "Chinese", "Employed", TRUE  
24 112, FALSE, "Male", "low", "Indian", "Employed", FALSE  
25 113, FALSE, "Female", "high", "Chinese", "Employed", FALSE  
26 114, FALSE, "Male", "high", "Chinese", "Employed", FALSE  
27 115, TRUE, "Female", "low", "Chinese", "Employed", TRUE  
28 31, TRUE, "Male", "low", "Chinese", "Employed", FALSE  
29 30, TRUE, "Male", "low", "Chinese", "Employed", FALSE  
30 462, TRUE, "Female", "low", "Indian", "Not in labor force", FALSE  
31 424, FALSE, "Male", "high", "Chinese", "Employed", TRUE  
32 28, FALSE, "Female", "high", "Malay", "Employed", FALSE  
33 401, TRUE, "Female", "low", "Malay", "Employed", TRUE  
34 427, FALSE, "Male", "low", "Malay", "Employed", TRUE  
35 433, FALSE, "Female", "high", "Indian", "Employed", TRUE  
36 428, FALSE, "Female", "low", "Chinese", "Not in labor force", FALSE  
37 29, FALSE, "Female", "low", "Chinese", "Employed", FALSE  
38 387, TRUE, "Female", "low", "Chinese", "Employed", TRUE  
39 426, TRUE, "Male", "low", "Malay", "Not in labor force", FALSE  
40 434, TRUE, "Male", "low", "Chinese", "Unemployed", FALSE  
41 425, TRUE, "Female", "low", "Chinese", "Not in labor force", TRUE  
42 180, FALSE, "Female", "low", "Chinese", "Employed", TRUE  
43 90, FALSE, "Male", "low", "Chinese", "Employed", FALSE  
44 91, TRUE, "Female", "low", "Chinese", "Not in labor force", TRUE  
45 92, TRUE, "Female", "low", "Chinese", "Not in labor force", TRUE  
46 93, FALSE, "Male", "high", "Chinese", "Not in labor force", FALSE  
47 94, TRUE, "Female", "low", "Chinese", "Not in labor force", TRUE  
48  
49  
50  
51  
52  
53  
54  
55  
56  
57  
58  
59  
60

1  
2  
3 "CaseNo", "Quarantine.A", "Isolation.A", "NoMassGatherings.A", "TempScreening.A",  
4 "Tax.A", "Infections.A", "Deaths.A", "Quarantine.B", "Isolation.B", "NoMassGatheri  
5 ngs.B", "TempScreening.B", "Tax.B", "Infections.B", "Deaths.B", "Choice"  
6 166,2,1,2,2,3,2,1,1,2,3,2,1,5,4, "Scenario A"  
7 166,1,2,2,3,2,1,5,2,1,1,1,4,3,3, "Scenario A"  
8 166,2,2,1,1,2,4,5,1,2,2,2,3,1,1, "Scenario B"  
9 166,1,1,3,3,1,4,1,2,2,1,2,4,3,2, "Scenario A"  
10 166,2,1,2,1,4,2,3,1,1,3,3,1,5,3, "Scenario B"  
11 166,2,2,3,1,1,1,1,1,1,1,3,3,3,4, "Scenario A"  
12 166,1,2,1,2,3,2,4,2,1,2,2,2,5,3, "Scenario B"  
13 166,2,2,3,3,4,3,5,2,1,2,1,3,5,2, "Scenario A"  
14 166,1,2,1,1,2,4,5,2,1,3,3,4,2,4, "Scenario B"  
15 166,1,1,2,2,2,1,1,2,2,3,1,1,1,2, "Scenario B"  
16 162,1,2,2,2,4,3,2,1,1,1,3,3,4,3, "Scenario A"  
17 162,2,1,3,1,2,5,4,1,2,1,3,4,2,1, "Scenario A"  
18 162,1,1,1,3,1,4,5,2,2,2,2,2,3,5, "Scenario A"  
19 162,2,1,2,2,1,4,1,1,2,2,1,3,1,2, "Scenario A"  
20 162,1,1,3,2,2,2,3,2,2,3,3,1,2,4, "Scenario A"  
21 162,2,1,1,1,4,1,2,1,2,3,2,2,5,3, "Scenario A"  
22 162,2,1,1,2,1,4,4,1,2,3,1,3,3,5, "Scenario A"  
23 162,2,2,2,3,3,5,4,1,2,2,3,4,4,1, "Scenario B"  
24 162,1,1,2,1,4,3,5,2,1,1,2,3,5,1, "Scenario A"  
25 162,1,1,3,1,1,1,2,2,2,3,3,2,4,1, "Scenario B"  
26 163,2,1,2,3,1,3,1,1,2,1,1,1,2,2, "Scenario A"  
27 163,1,1,2,1,2,2,3,2,2,3,2,4,1,2, "Scenario A"  
28 163,2,1,3,2,3,5,5,1,2,1,3,4,4,4, "Scenario B"  
29 163,1,2,3,3,1,4,3,2,1,1,1,2,1,4, "Scenario A"  
30 163,1,1,2,1,4,5,5,2,2,1,2,3,4,1, "Scenario A"  
31 163,2,1,2,3,1,1,3,1,2,2,1,2,3,1, "Scenario B"  
32 163,1,2,1,2,1,3,4,2,1,3,3,3,5,1, "Scenario A"  
33 163,2,2,3,2,1,1,5,1,1,2,3,4,2,2, "Scenario B"  
34 163,2,2,3,1,2,4,2,1,1,1,2,2,2,5, "Scenario B"  
35 163,2,2,1,1,3,3,4,1,1,2,3,1,3,5, "Scenario B"  
36 153,1,1,3,3,3,1,2,1,2,2,3,2,2,5, "Scenario B"  
37 153,1,2,3,2,1,1,4,2,1,2,3,4,5,3, "Scenario B"  
38 153,2,2,1,2,3,4,2,1,1,3,1,1,4,5, "Scenario A"  
39 153,1,2,1,1,3,2,1,2,1,1,2,4,3,1, "Scenario A"  
40 153,1,2,2,2,2,3,2,2,2,3,1,4,5,1, "Scenario A"  
41 153,2,1,2,1,2,1,4,1,1,1,3,2,5,2, "Scenario A"  
42 153,2,1,1,3,1,2,1,1,2,3,2,4,3,4, "Scenario A"  
43 153,1,1,3,3,1,5,2,2,2,2,1,3,1,3, "Scenario B"  
44 153,1,1,2,2,3,3,3,2,2,3,1,2,4,5, "Scenario B"  
45 153,1,2,2,3,1,5,4,2,1,3,2,4,2,5, "Scenario A"  
46 159,2,1,2,2,3,2,1,1,2,3,2,1,5,4, "Scenario A"  
47 159,1,2,2,3,2,1,5,2,1,1,1,4,3,3, "Scenario B"  
48 159,2,2,1,1,2,4,5,1,2,2,2,3,1,1, "Scenario A"  
49 159,1,1,3,3,1,4,1,2,2,1,2,4,3,2, "Scenario B"  
50 159,2,1,2,1,4,2,3,1,1,3,3,1,5,3, "Scenario A"  
51 159,2,2,3,1,1,1,1,1,1,1,1,3,3,3,4, "Scenario A"  
52 159,1,2,1,2,3,2,4,2,1,2,2,2,5,3, "Scenario B"  
53 159,2,2,3,3,4,3,5,2,1,2,1,3,5,2, "Scenario B"  
54 159,1,2,1,1,2,4,5,2,1,3,3,4,2,4, "Scenario A"  
55 159,1,1,2,2,2,1,1,2,2,3,1,1,1,2, "Scenario A"  
56 184,1,2,2,2,4,3,2,1,1,1,3,3,4,3, "Scenario A"  
57 184,2,1,3,1,2,5,4,1,2,1,3,4,2,1, "Scenario A"  
58 184,1,1,1,3,1,4,5,2,2,2,2,2,3,5, "Scenario A"  
59 184,2,1,2,2,1,4,1,1,2,2,1,3,1,2, "Scenario A"  
60

1  
2  
3 184,1,1,3,2,2,2,3,2,2,3,3,1,2,4,"Scenario A"  
4 184,2,1,1,1,4,1,2,1,2,3,2,2,5,3,"Scenario A"  
5 184,2,1,1,2,1,4,4,1,2,3,1,3,3,5,"Scenario A"  
6 184,2,2,2,3,3,5,4,1,2,2,3,4,4,1,"Scenario A"  
7 184,1,1,2,1,4,3,5,2,1,1,2,3,5,1,"Scenario A"  
8 184,1,1,3,1,1,1,2,2,2,3,3,2,4,1,"Scenario A"  
9 185,2,1,2,3,1,3,1,1,2,1,1,1,2,2,"Scenario A"  
10 185,1,1,2,1,2,2,3,2,2,3,2,4,1,2,"Scenario A"  
11 185,2,1,3,2,3,5,5,1,2,1,3,4,4,4,"Scenario B"  
12 185,1,2,3,3,1,4,3,2,1,1,1,2,1,4,"Scenario A"  
13 185,1,1,2,1,4,5,5,2,2,1,2,3,4,1,"Scenario A"  
14 185,2,1,2,3,1,1,3,1,2,2,1,2,3,1,"Scenario A"  
15 185,1,2,1,2,1,3,4,2,1,3,3,3,5,1,"Scenario B"  
16 185,2,2,3,2,1,1,5,1,1,2,3,4,2,2,"Scenario A"  
17 185,2,2,3,1,2,4,2,1,1,1,2,2,2,5,"Scenario B"  
18 185,2,2,1,1,3,3,4,1,1,2,3,1,3,5,"Scenario A"  
19 156,1,1,3,3,3,1,2,1,2,2,3,2,2,5,"Scenario A"  
20 156,1,2,3,2,1,1,4,2,1,2,3,4,5,3,"Scenario B"  
21 156,2,2,1,2,3,4,2,1,1,3,1,1,4,5,"Scenario A"  
22 156,1,2,1,1,3,2,1,2,1,1,2,4,3,1,"Scenario A"  
23 156,1,2,2,2,2,3,2,2,2,3,1,4,5,1,"Scenario B"  
24 156,2,1,2,1,2,1,4,1,1,1,3,2,5,2,"Scenario B"  
25 156,2,1,1,3,1,2,1,1,2,3,2,4,3,4,"Scenario A"  
26 156,1,1,3,3,1,5,2,2,2,2,1,3,1,3,"Scenario A"  
27 156,1,1,2,2,3,3,3,2,2,3,1,2,4,5,"Scenario A"  
28 156,1,2,2,3,1,5,4,2,1,3,2,4,2,5,"Scenario A"  
29 155,2,1,2,2,3,2,1,1,2,3,2,1,5,4,"Scenario B"  
30 155,1,2,2,3,2,1,5,2,1,1,1,4,3,3,"Scenario A"  
31 155,2,2,1,1,2,4,5,1,2,2,2,3,1,1,"Scenario A"  
32 155,1,1,3,3,1,4,1,2,2,1,2,4,3,2,"Scenario A"  
33 155,2,1,2,1,4,2,3,1,1,3,3,1,5,3,"Scenario B"  
34 155,2,2,3,1,1,1,1,1,1,1,3,3,3,4,"Scenario A"  
35 155,1,2,1,2,3,2,4,2,1,2,2,2,5,3,"Scenario B"  
36 155,2,2,3,3,4,3,5,2,1,2,1,3,5,2,"Scenario B"  
37 155,1,2,1,1,2,4,5,2,1,3,3,4,2,4,"Scenario A"  
38 155,1,1,2,2,2,1,1,2,2,3,1,1,1,2,"Scenario A"  
39 158,1,2,2,2,4,3,2,1,1,1,3,3,4,3,"Scenario A"  
40 158,2,1,3,1,2,5,4,1,2,1,3,4,2,1,"Scenario A"  
41 158,1,1,1,3,1,4,5,2,2,2,2,2,3,5,"Scenario A"  
42 158,2,1,2,2,1,4,1,1,2,2,1,3,1,2,"Scenario B"  
43 158,1,1,3,2,2,2,3,2,2,3,3,1,2,4,"Scenario A"  
44 158,2,1,1,1,4,1,2,1,2,3,2,2,5,3,"Scenario A"  
45 158,2,1,1,2,1,4,4,1,2,3,1,3,3,5,"Scenario B"  
46 158,2,2,2,3,3,5,4,1,2,2,3,4,4,1,"Scenario A"  
47 158,1,1,2,1,4,3,5,2,1,1,2,3,5,1,"Scenario B"  
48 158,1,1,3,1,1,1,2,2,2,3,3,2,4,1,"Scenario A"  
49 161,2,1,2,3,1,3,1,1,2,1,1,1,2,2,"Scenario B"  
50 161,1,1,2,1,2,2,2,3,2,2,3,2,4,1,2,"Scenario A"  
51 161,2,1,3,2,3,5,5,1,2,1,3,4,4,4,"Scenario B"  
52 161,1,2,3,3,1,4,3,2,1,1,1,2,1,4,"Scenario B"  
53 161,1,1,2,1,4,5,5,2,2,1,2,3,4,1,"Scenario A"  
54 161,2,1,2,3,1,1,3,1,2,2,1,2,3,1,"Scenario A"  
55 161,1,2,1,2,1,3,4,2,1,3,3,3,5,1,"Scenario A"  
56 161,2,2,3,2,1,1,5,1,1,2,3,4,2,2,"Scenario B"  
57 161,2,2,3,1,2,4,2,1,1,1,2,2,2,5,"Scenario B"  
58 161,2,2,1,1,3,3,4,1,1,2,3,1,3,5,"Scenario B"  
59 164,1,1,3,3,3,1,2,1,2,2,3,2,2,5,"Scenario B"  
60

1  
2  
3 164,1,2,3,2,1,1,4,2,1,2,3,4,5,3,"Scenario B"  
4 164,2,2,1,2,3,4,2,1,1,3,1,1,4,5,"Scenario B"  
5 164,1,2,1,1,3,2,1,2,1,1,2,4,3,1,"Scenario B"  
6 164,1,2,2,2,2,3,2,2,2,3,1,4,5,1,"Scenario A"  
7 164,2,1,2,1,2,1,4,1,1,1,3,2,5,2,"Scenario B"  
8 164,2,1,1,3,1,2,1,1,2,3,2,4,3,4,"Scenario A"  
9 164,1,1,3,3,1,5,2,2,2,2,1,3,1,3,"Scenario B"  
10 164,1,1,2,2,3,3,3,2,2,3,1,2,4,5,"Scenario B"  
11 164,1,2,2,3,1,5,4,2,1,3,2,4,2,5,"Scenario A"  
12 165,2,1,2,2,3,2,1,1,2,3,2,1,5,4,"Scenario A"  
13 165,1,2,2,3,2,1,5,2,1,1,1,4,3,3,"Scenario A"  
14 165,2,2,1,1,2,4,5,1,2,2,2,3,1,1,"Scenario B"  
15 165,1,1,3,3,1,4,1,2,2,1,2,4,3,2,"Scenario A"  
16 165,2,1,2,1,4,2,3,1,1,3,3,1,5,3,"Scenario A"  
17 165,2,2,3,1,1,1,1,1,1,1,3,3,3,4,"Scenario A"  
18 165,1,2,1,2,3,2,4,2,1,2,2,2,5,3,"Scenario B"  
19 165,2,2,3,3,4,3,5,2,1,2,1,3,5,2,"Scenario B"  
20 165,1,2,1,1,2,4,5,2,1,3,3,4,2,4,"Scenario B"  
21 165,1,1,2,2,2,1,1,2,2,3,1,1,1,2,"Scenario A"  
22 157,1,2,2,2,4,3,2,1,1,1,3,3,4,3,"Scenario A"  
23 157,2,1,3,1,2,5,4,1,2,1,3,4,2,1,"Scenario A"  
24 157,1,1,1,3,1,4,5,2,2,2,2,2,3,5,"Scenario B"  
25 157,2,1,2,2,1,4,1,1,2,2,1,3,1,2,"Scenario B"  
26 157,1,1,3,2,2,2,3,2,2,3,3,1,2,4,"Scenario B"  
27 157,2,1,1,1,4,1,2,1,2,3,2,2,5,3,"Scenario B"  
28 157,2,1,1,2,1,4,4,1,2,3,1,3,3,5,"Scenario A"  
29 157,2,2,2,3,3,5,4,1,2,2,3,4,4,1,"Scenario A"  
30 157,1,1,2,1,4,3,5,2,1,1,2,3,5,1,"Scenario B"  
31 157,1,1,3,1,1,1,2,2,2,3,3,2,4,1,"Scenario A"  
32 183,2,1,2,3,1,3,1,1,2,1,1,1,2,2,"Scenario B"  
33 183,1,1,2,1,2,2,3,2,2,3,2,4,1,2,"Scenario B"  
34 183,2,1,3,2,3,5,5,1,2,1,3,4,4,4,"Scenario A"  
35 183,1,2,3,3,1,4,3,2,1,1,1,2,1,4,"Scenario A"  
36 183,1,1,2,1,4,5,5,2,2,1,2,3,4,1,"Scenario A"  
37 183,2,1,2,3,1,1,3,1,2,2,1,2,3,1,"Scenario B"  
38 183,1,2,1,2,1,3,4,2,1,3,3,3,5,1,"Scenario A"  
39 183,2,2,3,2,1,1,5,1,1,2,3,4,2,2,"Scenario B"  
40 183,2,2,3,1,2,4,2,1,1,1,2,2,2,5,"Scenario A"  
41 183,2,2,1,1,3,3,4,1,1,2,3,1,3,5,"Scenario B"  
42 198,1,1,3,3,3,1,2,1,2,2,3,2,2,5,"Scenario A"  
43 198,1,2,3,2,1,1,4,2,1,2,3,4,5,3,"Scenario A"  
44 198,2,2,1,2,3,4,2,1,1,3,1,1,4,5,"Scenario A"  
45 198,1,2,1,1,3,2,1,2,1,1,2,4,3,1,"Scenario A"  
46 198,1,2,2,2,2,3,2,2,2,3,1,4,5,1,"Scenario A"  
47 198,2,1,2,1,2,1,4,1,1,1,3,2,5,2,"Scenario B"  
48 198,2,1,1,3,1,2,1,1,2,3,2,4,3,4,"Scenario B"  
49 198,1,1,3,3,1,5,2,2,2,2,1,3,1,3,"Scenario A"  
50 198,1,1,2,2,3,3,3,2,2,3,1,2,4,5,"Scenario A"  
51 198,1,2,2,3,1,5,4,2,1,3,2,4,2,5,"Scenario A"  
52 196,2,1,2,2,3,2,1,1,2,3,2,1,5,4,"Scenario B"  
53 196,1,2,2,3,2,1,5,2,1,1,1,4,3,3,"Scenario A"  
54 196,2,2,1,1,2,4,5,1,2,2,2,3,1,1,"Scenario B"  
55 196,1,1,3,3,1,4,1,2,2,1,2,4,3,2,"Scenario B"  
56 196,2,1,2,1,4,2,3,1,1,3,3,1,5,3,"Scenario B"  
57 196,2,2,3,1,1,1,1,1,1,1,3,3,3,4,"Scenario A"  
58 196,1,2,1,2,3,2,4,2,1,2,2,2,5,3,"Scenario A"  
59 196,2,2,3,3,4,3,5,2,1,2,1,3,5,2,"Scenario A"  
60

1  
2  
3 196,1,2,1,1,2,4,5,2,1,3,3,4,2,4,"Scenario B"  
4 196,1,1,2,2,2,1,1,2,2,3,1,1,1,2,"Scenario B"  
5 197,1,2,2,2,4,3,2,1,1,1,3,3,4,3,"Scenario B"  
6 197,2,1,3,1,2,5,4,1,2,1,3,4,2,1,"Scenario B"  
7 197,1,1,1,3,1,4,5,2,2,2,2,2,3,5,"Scenario A"  
8 197,2,1,2,2,1,4,1,1,2,2,1,3,1,2,"Scenario A"  
9 197,1,1,3,2,2,2,3,2,2,3,3,1,2,4,"Scenario A"  
10 197,2,1,1,1,4,1,2,1,2,3,2,2,5,3,"Scenario B"  
11 197,2,1,1,2,1,4,4,1,2,3,1,3,3,5,"Scenario B"  
12 197,2,2,2,3,3,5,4,1,2,2,3,4,4,1,"Scenario B"  
13 197,1,1,2,1,4,3,5,2,1,1,2,3,5,1,"Scenario B"  
14 197,1,1,3,1,1,1,2,2,2,3,3,2,4,1,"Scenario B"  
15 199,2,1,2,3,1,3,1,1,2,1,1,1,2,2,"Scenario A"  
16 199,1,1,2,1,2,2,3,2,2,3,2,4,1,2,"Scenario A"  
17 199,2,1,3,2,3,5,5,1,2,1,3,4,4,4,"Scenario B"  
18 199,1,2,3,3,1,4,3,2,1,1,1,2,1,4,"Scenario B"  
19 199,1,1,2,1,4,5,5,2,2,1,2,3,4,1,"Scenario A"  
20 199,2,1,2,3,1,1,3,1,2,2,1,2,3,1,"Scenario A"  
21 199,1,2,1,2,1,3,4,2,1,3,3,3,5,1,"Scenario A"  
22 199,2,2,3,2,1,1,5,1,1,2,3,4,2,2,"Scenario A"  
23 199,2,2,3,1,2,4,2,1,1,1,2,2,2,5,"Scenario A"  
24 199,2,2,1,1,3,3,4,1,1,2,3,1,3,5,"Scenario A"  
25 420,1,1,3,3,3,1,2,1,2,2,3,2,2,5,"Scenario A"  
26 420,1,2,3,2,1,1,4,2,1,2,3,4,5,3,"Scenario B"  
27 420,2,2,1,2,3,4,2,1,1,3,1,1,4,5,"Scenario B"  
28 420,1,2,1,1,3,2,1,2,1,1,2,4,3,1,"Scenario A"  
29 420,1,2,2,2,2,3,2,2,2,3,1,4,5,1,"Scenario A"  
30 420,2,1,2,1,2,1,4,1,1,1,3,2,5,2,"Scenario A"  
31 420,2,1,1,3,1,2,1,1,2,3,2,4,3,4,"Scenario A"  
32 420,1,1,3,3,1,5,2,2,2,2,1,3,1,3,"Scenario B"  
33 420,1,1,2,2,3,3,3,2,2,3,1,2,4,5,"Scenario B"  
34 420,1,2,2,3,1,5,4,2,1,3,2,4,2,5,"Scenario A"  
35 194,2,1,2,2,3,2,1,1,2,3,2,1,5,4,"Scenario B"  
36 194,1,2,2,3,2,1,5,2,1,1,1,4,3,3,"Scenario A"  
37 194,2,2,1,1,2,4,5,1,2,2,2,3,1,1,"Scenario B"  
38 194,1,1,3,3,1,4,1,2,2,1,2,4,3,2,"Scenario A"  
39 194,2,1,2,1,4,2,3,1,1,3,3,1,5,3,"Scenario B"  
40 194,2,2,3,1,1,1,1,1,1,1,3,3,3,4,"Scenario A"  
41 194,1,2,1,2,3,2,4,2,1,2,2,2,5,3,"Scenario A"  
42 194,2,2,3,3,4,3,5,2,1,2,1,3,5,2,"Scenario A"  
43 194,1,2,1,1,2,4,5,2,1,3,3,4,2,4,"Scenario A"  
44 194,1,1,2,2,2,1,1,2,2,3,1,1,1,2,"Scenario B"  
45 192,1,2,2,2,4,3,2,1,1,1,3,3,4,3,"Scenario A"  
46 192,2,1,3,1,2,5,4,1,2,1,3,4,2,1,"Scenario A"  
47 192,1,1,1,3,1,4,5,2,2,2,2,2,3,5,"Scenario A"  
48 192,2,1,2,2,1,4,1,1,2,2,1,3,1,2,"Scenario A"  
49 192,1,1,3,2,2,2,3,2,2,3,3,1,2,4,"Scenario A"  
50 192,2,1,1,1,4,1,2,1,2,3,2,2,5,3,"Scenario B"  
51 192,2,1,1,2,1,4,4,1,2,3,1,3,3,5,"Scenario B"  
52 192,2,2,2,3,3,5,4,1,2,2,3,4,4,1,"Scenario B"  
53 192,1,1,2,1,4,3,5,2,1,1,2,3,5,1,"Scenario A"  
54 192,1,1,3,1,1,1,2,2,2,3,3,2,4,1,"Scenario A"  
55 195,2,1,2,3,1,3,1,1,2,1,1,1,2,2,"Scenario A"  
56 195,1,1,2,1,2,2,3,2,2,3,2,4,1,2,"Scenario A"  
57 195,2,1,3,2,3,5,5,1,2,1,3,4,4,4,"Scenario A"  
58 195,1,2,3,3,1,4,3,2,1,1,1,2,1,4,"Scenario B"  
59 195,1,1,2,1,4,5,5,2,2,1,2,3,4,1,"Scenario A"  
60

1  
2  
3 195,2,1,2,3,1,1,3,1,2,2,1,2,3,1,"Scenario A"  
4 195,1,2,1,2,1,3,4,2,1,3,3,3,5,1,"Scenario B"  
5 195,2,2,3,2,1,1,5,1,1,2,3,4,2,2,"Scenario B"  
6 195,2,2,3,1,2,4,2,1,1,1,2,2,2,5,"Scenario A"  
7 195,2,2,1,1,3,3,4,1,1,2,3,1,3,5,"Scenario A"  
8 200,1,1,3,3,3,1,2,1,2,2,3,2,2,5,"Scenario B"  
9 200,1,2,3,2,1,1,4,2,1,2,3,4,5,3,"Scenario B"  
10 200,2,2,1,2,3,4,2,1,1,3,1,1,4,5,"Scenario B"  
11 200,1,2,1,1,3,2,1,2,1,1,2,4,3,1,"Scenario B"  
12 200,1,2,2,2,2,3,2,2,2,3,1,4,5,1,"Scenario B"  
13 200,2,1,2,1,2,1,4,1,1,1,1,3,2,5,2,"Scenario A"  
14 200,2,1,1,3,1,2,1,1,2,3,2,4,3,4,"Scenario A"  
15 200,1,1,3,3,1,5,2,2,2,2,1,3,1,3,"Scenario A"  
16 200,1,1,2,2,3,3,3,2,2,3,1,2,4,5,"Scenario A"  
17 200,1,2,2,3,1,5,4,2,1,3,2,4,2,5,"Scenario B"  
18 421,2,1,2,2,3,2,1,1,2,3,2,1,5,4,"Scenario A"  
19 421,1,2,2,3,2,1,5,2,1,1,1,4,3,3,"Scenario B"  
20 421,2,2,1,1,2,4,5,1,2,2,2,3,1,1,"Scenario B"  
21 421,1,1,3,3,1,4,1,2,2,1,2,4,3,2,"Scenario A"  
22 421,2,1,2,1,4,2,3,1,1,3,3,1,5,3,"Scenario A"  
23 421,2,2,3,1,1,1,1,1,1,1,3,3,3,4,"Scenario A"  
24 421,1,2,1,2,3,2,4,2,1,2,2,2,5,3,"Scenario A"  
25 421,2,2,3,3,4,3,5,2,1,2,1,3,5,2,"Scenario B"  
26 421,1,2,1,1,2,4,5,2,1,3,3,4,2,4,"Scenario A"  
27 421,1,1,2,2,2,1,1,2,2,3,1,1,1,2,"Scenario A"  
28 435,1,2,2,2,4,3,2,1,1,1,3,3,4,3,"Scenario B"  
29 435,2,1,3,1,2,5,4,1,2,1,3,4,2,1,"Scenario A"  
30 435,1,1,1,3,1,4,5,2,2,2,2,2,3,5,"Scenario A"  
31 435,2,1,2,2,1,4,1,1,2,2,1,3,1,2,"Scenario B"  
32 435,1,1,3,2,2,2,3,2,2,3,3,1,2,4,"Scenario B"  
33 435,2,1,1,1,4,1,2,1,2,3,2,2,5,3,"Scenario A"  
34 435,2,1,1,2,1,4,4,1,2,3,1,3,3,5,"Scenario A"  
35 435,2,2,2,3,3,5,4,1,2,2,3,4,4,1,"Scenario A"  
36 435,1,1,2,1,4,3,5,2,1,1,2,3,5,1,"Scenario A"  
37 435,1,1,3,1,1,1,2,2,2,3,3,2,4,1,"Scenario A"  
38 436,2,1,2,3,1,3,1,1,2,1,1,1,2,2,"Scenario A"  
39 436,1,1,2,1,2,2,3,2,2,3,2,4,1,2,"Scenario B"  
40 436,2,1,3,2,3,5,5,1,2,1,3,4,4,4,"Scenario B"  
41 436,1,2,3,3,1,4,3,2,1,1,1,2,1,4,"Scenario A"  
42 436,1,1,2,1,4,5,5,2,2,1,2,3,4,1,"Scenario B"  
43 436,2,1,2,3,1,1,3,1,2,2,1,2,3,1,"Scenario A"  
44 436,1,2,1,2,1,3,4,2,1,3,3,3,5,1,"Scenario A"  
45 436,2,2,3,2,1,1,5,1,1,2,3,4,2,2,"Scenario A"  
46 436,2,2,3,1,2,4,2,1,1,1,2,2,2,5,"Scenario B"  
47 436,2,2,1,1,3,3,4,1,1,2,3,1,3,5,"Scenario A"  
48 419,1,1,3,3,3,1,2,1,2,2,3,2,2,5,"Scenario A"  
49 419,1,2,3,2,1,1,4,2,1,2,3,4,5,3,"Scenario A"  
50 419,2,2,1,2,3,4,2,1,1,3,1,1,4,5,"Scenario B"  
51 419,1,2,1,1,3,2,1,2,1,1,2,4,3,1,"Scenario A"  
52 419,1,2,2,2,2,3,2,2,2,3,1,4,5,1,"Scenario A"  
53 419,2,1,2,1,2,1,4,1,1,1,3,2,5,2,"Scenario B"  
54 419,2,1,1,3,1,2,1,1,2,3,2,4,3,4,"Scenario B"  
55 419,1,1,3,3,1,5,2,2,2,2,1,3,1,3,"Scenario A"  
56 419,1,1,2,2,3,3,3,2,2,3,1,2,4,5,"Scenario A"  
57 419,1,2,2,3,1,5,4,2,1,3,2,4,2,5,"Scenario B"  
58 463,2,1,2,2,3,2,1,1,2,3,2,1,5,4,"Scenario A"  
59 463,1,2,2,3,2,1,5,2,1,1,1,4,3,3,"Scenario A"  
60

1  
2  
3 463,2,2,1,1,2,4,5,1,2,2,2,3,1,1,"Scenario B"  
4 463,1,1,3,3,1,4,1,2,2,1,2,4,3,2,"Scenario A"  
5 463,2,1,2,1,4,2,3,1,1,3,3,1,5,3,"Scenario A"  
6 463,2,2,3,1,1,1,1,1,1,1,3,3,3,4,"Scenario A"  
7 463,1,2,1,2,3,2,4,2,1,2,2,2,5,3,"Scenario B"  
8 463,2,2,3,3,4,3,5,2,1,2,1,3,5,2,"Scenario A"  
9 463,1,2,1,1,2,4,5,2,1,3,3,4,2,4,"Scenario A"  
10 463,1,1,2,2,2,1,1,2,2,3,1,1,1,2,"Scenario B"  
11 316,1,2,2,2,4,3,2,1,1,1,3,3,4,3,"Scenario B"  
12 316,2,1,3,1,2,5,4,1,2,1,3,4,2,1,"Scenario B"  
13 316,1,1,1,3,1,4,5,2,2,2,2,2,3,5,"Scenario A"  
14 316,2,1,2,2,1,4,1,1,2,2,1,3,1,2,"Scenario B"  
15 316,1,1,3,2,2,2,3,2,2,3,3,1,2,4,"Scenario A"  
16 316,2,1,1,1,4,1,2,1,2,3,2,2,5,3,"Scenario A"  
17 316,2,1,1,2,1,4,4,1,2,3,1,3,3,5,"Scenario A"  
18 316,2,2,2,3,3,5,4,1,2,2,3,4,4,1,"Scenario B"  
19 316,1,1,2,1,4,3,5,2,1,1,2,3,5,1,"Scenario A"  
20 316,1,1,3,1,1,1,2,2,2,3,3,2,4,1,"Scenario B"  
21 273,2,1,2,3,1,3,1,1,2,1,1,1,2,2,"Scenario A"  
22 273,1,1,2,1,2,2,3,2,2,3,2,4,1,2,"Scenario B"  
23 273,2,1,3,2,3,5,5,1,2,1,3,4,4,4,"Scenario B"  
24 273,1,2,3,3,1,4,3,2,1,1,1,2,1,4,"Scenario A"  
25 273,1,1,2,1,4,5,5,2,2,1,2,3,4,1,"Scenario B"  
26 273,2,1,2,3,1,1,3,1,2,2,1,2,3,1,"Scenario A"  
27 273,1,2,1,2,1,3,4,2,1,3,3,3,5,1,"Scenario B"  
28 273,2,2,3,2,1,1,5,1,1,2,3,4,2,2,"Scenario B"  
29 273,2,2,3,1,2,4,2,1,1,1,2,2,2,5,"Scenario A"  
30 273,2,2,1,1,3,3,4,1,1,2,3,1,3,5,"Scenario A"  
31 207,1,1,3,3,3,1,2,1,2,2,3,2,2,5,"Scenario A"  
32 207,1,2,3,2,1,1,4,2,1,2,3,4,5,3,"Scenario B"  
33 207,2,2,1,2,3,4,2,1,1,3,1,1,4,5,"Scenario A"  
34 207,1,2,1,1,3,2,1,2,1,1,2,4,3,1,"Scenario B"  
35 207,1,2,2,2,2,3,2,2,2,3,1,4,5,1,"Scenario A"  
36 207,2,1,2,1,2,1,4,1,1,1,3,2,5,2,"Scenario B"  
37 207,2,1,1,3,1,2,1,1,2,3,2,4,3,4,"Scenario B"  
38 207,1,1,3,3,1,5,2,2,2,2,1,3,1,3,"Scenario A"  
39 207,1,1,2,2,3,3,3,2,2,3,1,2,4,5,"Scenario A"  
40 207,1,2,2,3,1,5,4,2,1,3,2,4,2,5,"Scenario B"  
41 270,2,1,2,2,3,2,1,1,2,3,2,1,5,4,"Scenario B"  
42 270,1,2,2,3,2,1,5,2,1,1,1,4,3,3,"Scenario A"  
43 270,2,2,1,1,2,4,5,1,2,2,2,3,1,1,"Scenario B"  
44 270,1,1,3,3,1,4,1,2,2,1,2,4,3,2,"Scenario A"  
45 270,2,1,2,1,4,2,3,1,1,3,3,1,5,3,"Scenario B"  
46 270,2,2,3,1,1,1,1,1,1,1,3,3,3,4,"Scenario B"  
47 270,1,2,1,2,3,2,4,2,1,2,2,2,5,3,"Scenario B"  
48 270,2,2,3,3,4,3,5,2,1,2,1,3,5,2,"Scenario A"  
49 270,1,2,1,1,2,4,5,2,1,3,3,4,2,4,"Scenario B"  
50 270,1,1,2,2,2,1,1,2,2,3,1,1,1,2,"Scenario A"  
51 272,1,2,2,2,4,3,2,1,1,1,3,3,4,3,"Scenario A"  
52 272,2,1,3,1,2,5,4,1,2,1,3,4,2,1,"Scenario A"  
53 272,1,1,1,3,1,4,5,2,2,2,2,2,3,5,"Scenario B"  
54 272,2,1,2,2,1,4,1,1,2,2,1,3,1,2,"Scenario B"  
55 272,1,1,3,2,2,2,3,2,2,3,3,1,2,4,"Scenario B"  
56 272,2,1,1,1,4,1,2,1,2,3,2,2,5,3,"Scenario B"  
57 272,2,1,1,2,1,4,4,1,2,3,1,3,3,5,"Scenario B"  
58 272,2,2,2,3,3,5,4,1,2,2,3,4,4,1,"Scenario B"  
59 272,1,1,2,1,4,3,5,2,1,1,2,3,5,1,"Scenario B"  
60

1  
2  
3 272,1,1,3,1,1,1,2,2,2,3,3,2,4,1,"Scenario B"  
4 289,2,1,2,3,1,3,1,1,2,1,1,1,2,2,"Scenario A"  
5 289,1,1,2,1,2,2,3,2,2,3,2,4,1,2,"Scenario A"  
6 289,2,1,3,2,3,5,5,1,2,1,3,4,4,4,"Scenario B"  
7 289,1,2,3,3,1,4,3,2,1,1,1,2,1,4,"Scenario A"  
8 289,1,1,2,1,4,5,5,2,2,1,2,3,4,1,"Scenario B"  
9 289,2,1,2,3,1,1,3,1,2,2,1,2,3,1,"Scenario A"  
10 289,1,2,1,2,1,3,4,2,1,3,3,3,5,1,"Scenario A"  
11 289,2,2,3,2,1,1,5,1,1,2,3,4,2,2,"Scenario A"  
12 289,2,2,3,1,2,4,2,1,1,1,2,2,2,5,"Scenario A"  
13 289,2,2,1,1,3,3,4,1,1,2,3,1,3,5,"Scenario B"  
14 243,1,1,3,3,3,1,2,1,2,2,3,2,2,5,"Scenario A"  
15 243,1,2,3,2,1,1,4,2,1,2,3,4,5,3,"Scenario A"  
16 243,2,2,1,2,3,4,2,1,1,3,1,1,4,5,"Scenario A"  
17 243,1,2,1,1,3,2,1,2,1,1,2,4,3,1,"Scenario A"  
18 243,1,2,2,2,2,3,2,2,2,3,1,4,5,1,"Scenario A"  
19 243,2,1,2,1,2,1,4,1,1,1,3,2,5,2,"Scenario B"  
20 243,2,1,1,3,1,2,1,1,2,3,2,4,3,4,"Scenario B"  
21 243,1,1,3,3,1,5,2,2,2,2,1,3,1,3,"Scenario B"  
22 243,1,1,2,2,3,3,3,2,2,3,1,2,4,5,"Scenario B"  
23 243,1,2,2,3,1,5,4,2,1,3,2,4,2,5,"Scenario A"  
24 242,2,1,2,2,3,2,1,1,2,3,2,1,5,4,"Scenario A"  
25 242,1,2,2,3,2,1,5,2,1,1,1,4,3,3,"Scenario B"  
26 242,2,2,1,1,2,4,5,1,2,2,2,3,1,1,"Scenario B"  
27 242,1,1,3,3,1,4,1,2,2,1,2,4,3,2,"Scenario A"  
28 242,2,1,2,1,4,2,3,1,1,3,3,1,5,3,"Scenario B"  
29 242,2,2,3,1,1,1,1,1,1,1,3,3,3,4,"Scenario A"  
30 242,1,2,1,2,3,2,4,2,1,2,2,2,5,3,"Scenario B"  
31 242,2,2,3,3,4,3,5,2,1,2,1,3,5,2,"Scenario A"  
32 242,1,2,1,2,1,2,4,5,2,1,3,3,4,2,4,"Scenario A"  
33 242,1,1,2,2,2,1,1,2,2,3,1,1,1,2,"Scenario A"  
34 363,1,2,2,2,4,3,2,1,1,1,3,3,4,3,"Scenario A"  
35 363,2,1,3,1,2,5,4,1,2,1,3,4,2,1,"Scenario B"  
36 363,1,1,1,3,1,4,5,2,2,2,2,2,3,5,"Scenario B"  
37 363,2,1,2,2,1,4,1,1,2,2,1,3,1,2,"Scenario A"  
38 363,1,1,3,2,2,2,3,2,2,3,3,1,2,4,"Scenario B"  
39 363,2,1,1,1,4,1,2,1,2,3,2,2,5,3,"Scenario B"  
40 363,2,1,1,2,1,4,4,1,2,3,1,3,3,5,"Scenario A"  
41 363,2,2,2,3,3,5,4,1,2,2,3,4,4,1,"Scenario A"  
42 363,1,1,2,1,4,3,5,2,1,1,2,3,5,1,"Scenario B"  
43 363,1,1,3,1,1,1,2,2,2,3,3,2,4,1,"Scenario B"  
44 360,2,1,2,3,1,3,1,1,2,1,1,1,2,2,"Scenario A"  
45 360,1,1,2,1,2,2,3,2,2,3,2,4,1,2,"Scenario B"  
46 360,2,1,3,2,3,5,5,1,2,1,3,4,4,4,"Scenario A"  
47 360,1,2,3,3,1,4,3,2,1,1,1,2,1,4,"Scenario A"  
48 360,1,1,2,1,4,5,5,2,2,1,2,3,4,1,"Scenario B"  
49 360,2,1,2,3,1,1,3,1,2,2,1,2,3,1,"Scenario B"  
50 360,1,2,1,2,1,3,4,2,1,3,3,3,5,1,"Scenario B"  
51 360,2,2,3,2,1,1,5,1,1,2,3,4,2,2,"Scenario A"  
52 360,2,2,3,1,2,4,2,1,1,1,2,2,2,5,"Scenario A"  
53 360,2,2,1,1,3,3,4,1,1,2,3,1,3,5,"Scenario A"  
54 361,1,1,3,3,3,1,2,1,2,2,3,2,2,5,"Scenario A"  
55 361,1,2,3,2,1,1,4,2,1,2,3,4,5,3,"Scenario B"  
56 361,2,2,1,2,3,4,2,1,1,3,1,1,4,5,"Scenario A"  
57 361,1,2,1,1,3,2,1,2,1,1,2,4,3,1,"Scenario A"  
58 361,1,2,2,2,2,3,2,2,2,3,1,4,5,1,"Scenario B"  
59 361,2,1,2,1,2,1,4,1,1,1,3,2,5,2,"Scenario B"  
60



1  
2  
3 361,2,1,1,3,1,2,1,1,2,3,2,4,3,4,"Scenario A"  
4 361,1,1,3,3,1,5,2,2,2,2,1,3,1,3,"Scenario A"  
5 361,1,1,2,2,3,3,3,2,2,3,1,2,4,5,"Scenario A"  
6 361,1,2,2,3,1,5,4,2,1,3,2,4,2,5,"Scenario A"  
7 201,2,1,2,2,3,2,1,1,2,3,2,1,5,4,"Scenario A"  
8 201,1,2,2,3,2,1,5,2,1,1,1,4,3,3,"Scenario B"  
9 201,2,2,1,1,2,4,5,1,2,2,2,3,1,1,"Scenario B"  
10 201,1,1,3,3,1,4,1,2,2,1,2,4,3,2,"Scenario A"  
11 201,2,1,2,1,4,2,3,1,1,3,3,1,5,3,"Scenario B"  
12 201,2,2,3,1,1,1,1,1,1,1,3,3,3,4,"Scenario A"  
13 201,1,2,1,2,3,2,4,2,1,2,2,2,5,3,"Scenario B"  
14 201,2,2,3,3,4,3,5,2,1,2,1,3,5,2,"Scenario B"  
15 201,1,2,1,1,2,4,5,2,1,3,3,4,2,4,"Scenario B"  
16 201,1,1,2,2,2,1,1,2,2,3,1,1,1,2,"Scenario A"  
17 202,1,2,2,2,4,3,2,1,1,1,3,3,4,3,"Scenario A"  
18 202,2,1,3,1,2,5,4,1,2,1,3,4,2,1,"Scenario B"  
19 202,1,1,1,3,1,4,5,2,2,2,2,2,3,5,"Scenario B"  
20 202,2,1,2,2,1,4,1,1,2,2,1,3,1,2,"Scenario A"  
21 202,1,1,3,2,2,2,3,2,2,3,3,1,2,4,"Scenario A"  
22 202,2,1,1,1,4,1,2,1,2,3,2,2,5,3,"Scenario A"  
23 202,2,1,1,2,1,4,4,1,2,3,1,3,3,5,"Scenario A"  
24 202,2,2,2,3,3,5,4,1,2,2,3,4,4,1,"Scenario B"  
25 202,1,1,2,1,4,3,5,2,1,1,2,3,5,1,"Scenario B"  
26 202,1,1,3,1,1,1,2,2,2,3,3,2,4,1,"Scenario B"  
27 214,2,1,2,3,1,3,1,1,2,1,1,1,2,2,"Scenario A"  
28 214,1,1,2,1,2,2,3,2,2,3,2,4,1,2,"Scenario B"  
29 214,2,1,3,2,3,5,5,1,2,1,3,4,4,4,"Scenario A"  
30 214,1,2,3,3,1,4,3,2,1,1,1,2,1,4,"Scenario A"  
31 214,1,1,2,1,4,5,5,2,2,1,2,3,4,1,"Scenario B"  
32 214,2,1,2,3,1,1,3,1,2,2,1,2,3,1,"Scenario A"  
33 214,1,2,1,2,1,3,4,2,1,3,3,3,5,1,"Scenario B"  
34 214,2,2,3,2,1,1,5,1,1,2,3,4,2,2,"Scenario B"  
35 214,2,2,3,1,2,4,2,1,1,1,2,2,2,5,"Scenario A"  
36 214,2,2,1,1,3,3,4,1,1,2,3,1,3,5,"Scenario B"  
37 208,1,1,3,3,3,1,2,1,2,2,3,2,2,5,"Scenario B"  
38 208,1,2,3,2,1,1,4,2,1,2,3,4,5,3,"Scenario B"  
39 208,2,2,1,2,3,4,2,1,1,3,1,1,4,5,"Scenario A"  
40 208,1,2,1,1,3,2,1,2,1,1,2,4,3,1,"Scenario B"  
41 208,1,2,2,2,2,3,2,2,2,3,1,4,5,1,"Scenario B"  
42 208,2,1,2,1,2,1,4,1,1,1,3,2,5,2,"Scenario A"  
43 208,2,1,1,3,1,2,1,1,2,3,2,4,3,4,"Scenario B"  
44 208,1,1,3,3,1,5,2,2,2,2,1,3,1,3,"Scenario A"  
45 208,1,1,2,2,3,3,3,2,2,3,1,2,4,5,"Scenario B"  
46 208,1,2,2,3,1,5,4,2,1,3,2,4,2,5,"Scenario A"  
47 216,2,1,2,2,3,2,1,1,2,3,2,1,5,4,"Scenario A"  
48 216,1,2,2,3,2,1,5,2,1,1,1,4,3,3,"Scenario A"  
49 216,2,2,1,1,2,4,5,1,2,2,2,3,1,1,"Scenario A"  
50 216,1,1,3,3,1,4,1,2,2,1,2,4,3,2,"Scenario A"  
51 216,2,1,2,1,4,2,3,1,1,3,3,1,5,3,"Scenario A"  
52 216,2,2,3,1,1,1,1,1,1,1,3,3,3,4,"Scenario A"  
53 216,1,2,1,2,3,2,4,2,1,2,2,2,5,3,"Scenario A"  
54 216,2,2,3,3,4,3,5,2,1,2,1,3,5,2,"Scenario A"  
55 216,1,2,1,1,2,4,5,2,1,3,3,4,2,4,"Scenario A"  
56 216,1,1,2,2,2,1,1,2,2,3,1,1,1,2,"Scenario A"  
57 205,1,2,2,2,4,3,2,1,1,1,3,3,4,3,"Scenario A"  
58 205,2,1,3,1,2,5,4,1,2,1,3,4,2,1,"Scenario B"  
59 205,1,1,1,3,1,4,5,2,2,2,2,2,3,5,"Scenario A"  
60

1  
2  
3 205,2,1,2,2,1,4,1,1,2,2,1,3,1,2,"Scenario A"  
4 205,1,1,3,2,2,2,3,2,2,3,3,1,2,4,"Scenario A"  
5 205,2,1,1,1,4,1,2,1,2,3,2,2,5,3,"Scenario A"  
6 205,2,1,1,2,1,4,4,1,2,3,1,3,3,5,"Scenario A"  
7 205,2,2,2,3,3,5,4,1,2,2,3,4,4,1,"Scenario B"  
8 205,1,1,2,1,4,3,5,2,1,1,2,3,5,1,"Scenario B"  
9 205,1,1,3,1,1,1,2,2,2,3,3,2,4,1,"Scenario B"  
10 212,2,1,2,3,1,3,1,1,2,1,1,1,2,2,"Scenario A"  
11 212,1,1,2,1,2,2,3,2,2,3,2,4,1,2,"Scenario B"  
12 212,2,1,3,2,3,5,5,1,2,1,3,4,4,4,"Scenario A"  
13 212,1,2,3,3,1,4,3,2,1,1,1,2,1,4,"Scenario A"  
14 212,1,1,2,3,1,4,5,5,2,2,1,2,3,4,1,"Scenario B"  
15 212,2,1,2,3,1,1,3,1,2,2,1,2,3,1,"Scenario A"  
16 212,1,2,1,2,1,3,4,2,1,3,3,3,5,1,"Scenario B"  
17 212,2,2,3,2,1,1,5,1,1,2,3,4,2,2,"Scenario A"  
18 212,2,2,3,1,2,4,2,1,1,1,2,2,2,5,"Scenario A"  
19 212,2,2,1,1,3,3,4,1,1,2,3,1,3,5,"Scenario B"  
20 206,1,1,3,3,3,1,2,1,2,2,3,2,2,5,"Scenario A"  
21 206,1,2,3,2,1,1,4,2,1,2,3,4,5,3,"Scenario A"  
22 206,2,2,1,2,3,4,2,1,1,3,1,1,4,5,"Scenario A"  
23 206,1,2,1,1,3,2,1,2,1,1,2,4,3,1,"Scenario B"  
24 206,1,2,2,2,2,3,2,2,2,3,1,4,5,1,"Scenario B"  
25 206,2,1,2,1,2,1,4,1,1,1,3,2,5,2,"Scenario B"  
26 206,2,1,1,3,1,2,1,1,2,3,2,4,3,4,"Scenario A"  
27 206,1,1,3,3,1,5,2,2,2,2,1,3,1,3,"Scenario A"  
28 206,1,1,2,2,3,3,3,2,2,3,1,2,4,5,"Scenario A"  
29 206,1,2,2,3,1,5,4,2,1,3,2,4,2,5,"Scenario A"  
30 215,2,1,2,2,3,2,1,1,2,3,2,1,5,4,"Scenario B"  
31 215,1,2,2,3,2,1,5,2,1,1,1,4,3,3,"Scenario B"  
32 215,2,2,1,1,2,4,5,1,2,2,2,3,1,1,"Scenario A"  
33 215,1,1,3,3,1,4,1,2,2,1,2,4,3,2,"Scenario A"  
34 215,2,1,2,1,4,2,3,1,1,3,3,1,5,3,"Scenario A"  
35 215,2,2,3,1,1,1,1,1,1,1,3,3,3,4,"Scenario A"  
36 215,1,2,1,2,3,2,4,2,1,2,2,2,5,3,"Scenario A"  
37 215,2,2,3,3,4,3,5,2,1,2,1,3,5,2,"Scenario A"  
38 215,1,2,1,1,2,4,5,2,1,3,3,4,2,4,"Scenario B"  
39 215,1,1,2,2,2,1,1,2,2,3,1,1,1,2,"Scenario A"  
40 217,1,2,2,2,4,3,2,1,1,1,3,3,4,3,"Scenario B"  
41 217,2,1,3,1,2,5,4,1,2,1,3,4,2,1,"Scenario B"  
42 217,1,1,1,3,1,4,5,2,2,2,2,2,3,5,"Scenario B"  
43 217,2,1,2,2,1,4,1,1,2,2,1,3,1,2,"Scenario B"  
44 217,1,1,3,2,2,2,3,2,2,3,3,1,2,4,"Scenario B"  
45 217,2,1,1,1,4,1,2,1,2,3,2,2,5,3,"Scenario B"  
46 217,2,1,1,2,1,4,4,1,2,3,1,3,3,5,"Scenario B"  
47 217,2,2,2,3,3,5,4,1,2,2,3,4,4,1,"Scenario B"  
48 217,1,1,2,1,4,3,5,2,1,1,2,3,5,1,"Scenario A"  
49 217,1,1,3,1,1,1,2,2,2,3,3,2,4,1,"Scenario B"  
50 148,2,1,2,3,1,3,1,1,2,1,1,1,2,2,"Scenario A"  
51 148,1,1,2,1,2,2,3,2,2,3,2,4,1,2,"Scenario B"  
52 148,2,1,3,2,3,5,5,1,2,1,3,4,4,4,"Scenario A"  
53 148,1,2,3,3,1,4,3,2,1,1,1,2,1,4,"Scenario A"  
54 148,1,1,2,1,4,5,5,2,2,1,2,3,4,1,"Scenario B"  
55 148,2,1,2,3,1,1,3,1,2,2,1,2,3,1,"Scenario A"  
56 148,1,2,1,2,1,3,4,2,1,3,3,3,5,1,"Scenario A"  
57 148,2,2,3,2,1,1,5,1,1,2,3,4,2,2,"Scenario A"  
58 148,2,2,3,1,2,4,2,1,1,1,2,2,2,5,"Scenario B"  
59 148,2,2,1,1,3,3,4,1,1,2,3,1,3,5,"Scenario B"  
60

1  
2  
3 141,1,1,3,3,3,1,2,1,2,2,3,2,2,5,"Scenario A"  
4 141,1,2,3,2,1,1,4,2,1,2,3,4,5,3,"Scenario A"  
5 141,2,2,1,2,3,4,2,1,1,3,1,1,4,5,"Scenario B"  
6 141,1,2,1,1,3,2,1,2,1,1,2,4,3,1,"Scenario A"  
7 141,1,2,2,2,2,3,2,2,2,3,1,4,5,1,"Scenario A"  
8 141,2,1,2,1,2,1,4,1,1,1,3,2,5,2,"Scenario A"  
9 141,2,1,1,3,1,2,1,1,2,3,2,4,3,4,"Scenario A"  
10 141,1,1,3,3,1,5,2,2,2,2,1,3,1,3,"Scenario A"  
11 141,1,1,2,2,3,3,3,2,2,3,1,2,4,5,"Scenario B"  
12 141,1,2,2,3,1,5,4,2,1,3,2,4,2,5,"Scenario A"  
13 152,2,1,2,2,3,2,1,1,2,3,2,1,5,4,"Scenario B"  
14 152,1,2,2,3,2,1,5,2,1,1,1,4,3,3,"Scenario A"  
15 152,2,2,1,1,2,4,5,1,2,2,2,3,1,1,"Scenario B"  
16 152,1,1,3,3,1,4,1,2,2,1,2,4,3,2,"Scenario B"  
17 152,2,1,2,1,4,2,3,1,1,3,3,1,5,3,"Scenario B"  
18 152,2,2,3,1,1,1,1,1,1,3,3,3,4,"Scenario A"  
19 152,1,2,1,2,3,2,4,2,1,2,2,2,5,3,"Scenario B"  
20 152,2,2,3,3,4,3,5,2,1,2,1,3,5,2,"Scenario A"  
21 152,1,2,1,1,2,4,5,2,1,3,3,4,2,4,"Scenario A"  
22 152,1,1,2,2,2,1,1,2,2,3,1,1,1,2,"Scenario A"  
23 147,1,2,2,2,4,3,2,1,1,1,3,3,4,3,"Scenario A"  
24 147,2,1,3,1,2,5,4,1,2,1,3,4,2,1,"Scenario B"  
25 147,1,1,1,3,1,4,5,2,2,2,2,2,3,5,"Scenario A"  
26 147,2,1,2,2,1,4,1,1,2,2,1,3,1,2,"Scenario A"  
27 147,1,1,3,2,2,2,3,2,2,3,3,1,2,4,"Scenario B"  
28 147,2,1,1,1,4,1,2,1,2,3,2,2,5,3,"Scenario A"  
29 147,2,1,1,2,1,4,4,1,2,3,1,3,3,5,"Scenario B"  
30 147,2,2,2,3,3,5,4,1,2,2,3,4,4,1,"Scenario B"  
31 147,1,1,2,1,4,3,5,2,1,1,2,3,5,1,"Scenario B"  
32 147,1,1,3,1,1,1,2,2,2,3,3,2,4,1,"Scenario B"  
33 146,2,1,2,3,1,3,1,1,2,1,1,1,2,2,"Scenario A"  
34 146,1,1,2,1,2,2,3,2,2,3,2,4,1,2,"Scenario B"  
35 146,2,1,3,2,3,5,5,1,2,1,3,4,4,4,"Scenario A"  
36 146,1,2,3,3,1,4,3,2,1,1,1,2,1,4,"Scenario A"  
37 146,1,1,2,1,4,5,5,2,2,1,2,3,4,1,"Scenario B"  
38 146,2,1,2,3,1,1,3,1,2,2,1,2,3,1,"Scenario A"  
39 146,1,2,1,2,1,3,4,2,1,3,3,3,5,1,"Scenario B"  
40 146,2,2,3,2,1,1,5,1,1,2,3,4,2,2,"Scenario A"  
41 146,2,2,3,1,2,4,2,1,1,1,2,2,2,5,"Scenario A"  
42 146,2,2,1,1,3,3,4,1,1,2,3,1,3,5,"Scenario B"  
43 151,1,1,3,3,3,1,2,1,2,2,3,2,2,5,"Scenario B"  
44 151,1,2,3,2,1,1,4,2,1,2,3,4,5,3,"Scenario A"  
45 151,2,2,1,2,3,4,2,1,1,3,1,1,4,5,"Scenario A"  
46 151,1,2,1,1,3,2,1,2,1,1,2,4,3,1,"Scenario A"  
47 151,1,2,2,2,2,3,2,2,2,3,1,4,5,1,"Scenario B"  
48 151,2,1,2,1,2,1,4,1,1,1,3,2,5,2,"Scenario A"  
49 151,2,1,1,3,1,2,1,1,2,3,2,4,3,4,"Scenario B"  
50 151,1,1,3,3,1,5,2,2,2,2,1,3,1,3,"Scenario B"  
51 151,1,1,2,2,3,3,3,2,2,3,1,2,4,5,"Scenario B"  
52 151,1,2,2,3,1,5,4,2,1,3,2,4,2,5,"Scenario A"  
53 211,2,1,2,2,3,2,1,1,2,3,2,1,5,4,"Scenario A"  
54 211,1,2,2,3,2,1,5,2,1,1,1,4,3,3,"Scenario B"  
55 211,2,2,1,1,2,4,5,1,2,2,2,3,1,1,"Scenario B"  
56 211,1,1,3,3,1,4,1,2,2,1,2,4,3,2,"Scenario A"  
57 211,2,1,2,1,4,2,3,1,1,3,3,1,5,3,"Scenario A"  
58 211,2,2,3,1,1,1,1,1,1,1,3,3,3,4,"Scenario A"  
59 211,1,2,1,2,3,2,4,2,1,2,2,2,5,3,"Scenario B"  
60

1  
2  
3 211,2,2,3,3,4,3,5,2,1,2,1,3,5,2,"Scenario B"  
4 211,1,2,1,1,2,4,5,2,1,3,3,4,2,4,"Scenario B"  
5 211,1,1,2,2,2,1,1,2,2,3,1,1,1,2,"Scenario A"  
6 362,1,2,2,2,4,3,2,1,1,1,3,3,4,3,"Scenario B"  
7 362,2,1,3,1,2,5,4,1,2,1,3,4,2,1,"Scenario B"  
8 362,1,1,1,3,1,4,5,2,2,2,2,2,3,5,"Scenario A"  
9 362,2,1,2,2,1,4,1,1,2,2,1,3,1,2,"Scenario A"  
10 362,1,1,3,2,2,2,3,2,2,3,3,1,2,4,"Scenario B"  
11 362,2,1,1,1,4,1,2,1,2,3,2,2,5,3,"Scenario B"  
12 362,2,1,1,2,1,4,4,1,2,3,1,3,3,5,"Scenario A"  
13 362,2,2,2,3,3,5,4,1,2,2,3,4,4,1,"Scenario A"  
14 362,1,1,2,1,4,3,5,2,1,1,2,3,5,1,"Scenario B"  
15 362,1,1,3,1,1,1,2,2,2,3,3,2,4,1,"Scenario B"  
16 359,2,1,2,3,1,3,1,1,2,1,1,1,2,2,"Scenario A"  
17 359,1,1,2,1,2,2,3,2,2,3,2,4,1,2,"Scenario B"  
18 359,2,1,3,2,3,5,5,1,2,1,3,4,4,4,"Scenario B"  
19 359,1,2,3,3,1,4,3,2,1,1,1,2,1,4,"Scenario A"  
20 359,1,1,2,1,4,5,5,2,2,1,2,3,4,1,"Scenario B"  
21 359,2,1,2,3,1,1,3,1,2,2,1,2,3,1,"Scenario B"  
22 359,1,2,1,2,1,3,4,2,1,3,3,3,5,1,"Scenario B"  
23 359,2,2,3,2,1,1,5,1,1,2,3,4,2,2,"Scenario B"  
24 359,2,2,3,1,2,4,2,1,1,1,2,2,2,5,"Scenario A"  
25 359,2,2,1,1,3,3,4,1,1,2,3,1,3,5,"Scenario A"  
26 143,1,1,3,3,3,1,2,1,2,2,3,2,2,5,"Scenario A"  
27 143,1,2,3,2,1,1,4,2,1,2,3,4,5,3,"Scenario A"  
28 143,2,2,1,2,3,4,2,1,1,3,1,1,4,5,"Scenario A"  
29 143,1,2,1,1,3,2,1,2,1,1,2,4,3,1,"Scenario A"  
30 143,1,2,2,2,2,3,2,2,2,3,1,4,5,1,"Scenario A"  
31 143,2,1,2,1,2,1,4,1,1,1,3,2,5,2,"Scenario B"  
32 143,2,1,1,3,1,2,1,1,2,3,2,4,3,4,"Scenario B"  
33 143,1,1,3,3,1,5,2,2,2,2,1,3,1,3,"Scenario B"  
34 143,1,1,2,2,3,3,3,2,2,3,1,2,4,5,"Scenario A"  
35 143,1,2,2,3,1,5,4,2,1,3,2,4,2,5,"Scenario A"  
36 144,2,1,2,2,3,2,1,1,2,3,2,1,5,4,"Scenario A"  
37 144,1,2,2,3,2,1,5,2,1,1,1,4,3,3,"Scenario A"  
38 144,2,2,1,1,2,4,5,1,2,2,2,3,1,1,"Scenario A"  
39 144,1,1,3,3,1,4,1,2,2,1,2,4,3,2,"Scenario A"  
40 144,2,1,2,1,4,2,3,1,1,3,3,1,5,3,"Scenario A"  
41 144,2,2,3,1,1,1,1,1,1,1,3,3,3,4,"Scenario A"  
42 144,1,2,1,2,3,2,4,2,1,2,2,2,5,3,"Scenario A"  
43 144,2,2,3,3,4,3,5,2,1,2,1,3,5,2,"Scenario A"  
44 144,1,2,1,1,2,4,5,2,1,3,3,4,2,4,"Scenario B"  
45 144,1,1,2,2,2,1,1,2,2,3,1,1,1,2,"Scenario B"  
46 150,1,2,2,2,4,3,2,1,1,1,3,3,4,3,"Scenario B"  
47 150,2,1,3,1,2,5,4,1,2,1,3,4,2,1,"Scenario A"  
48 150,1,1,1,3,1,4,5,2,2,2,2,2,3,5,"Scenario A"  
49 150,2,1,2,2,1,4,1,1,2,2,1,3,1,2,"Scenario A"  
50 150,1,1,3,2,2,2,3,2,2,3,3,1,2,4,"Scenario B"  
51 150,2,1,1,1,4,1,2,1,2,3,2,2,5,3,"Scenario A"  
52 150,2,1,1,2,1,4,4,1,2,3,1,3,3,5,"Scenario B"  
53 150,2,2,2,3,3,5,4,1,2,2,3,4,4,1,"Scenario A"  
54 150,1,1,2,1,4,3,5,2,1,1,2,3,5,1,"Scenario B"  
55 150,1,1,3,1,1,1,2,2,2,3,3,2,4,1,"Scenario B"  
56 142,2,1,2,3,1,3,1,1,2,1,1,1,2,2,"Scenario A"  
57 142,1,1,2,1,2,2,3,2,2,3,2,4,1,2,"Scenario B"  
58 142,2,1,3,2,3,5,5,1,2,1,3,4,4,4,"Scenario B"  
59 142,1,2,3,3,1,4,3,2,1,1,1,2,1,4,"Scenario A"  
60

1  
2  
3 142,1,1,2,1,4,5,5,2,2,1,2,3,4,1,"Scenario B"  
4 142,2,1,2,3,1,1,3,1,2,2,1,2,3,1,"Scenario A"  
5 142,1,2,1,2,1,3,4,2,1,3,3,3,5,1,"Scenario B"  
6 142,2,2,3,2,1,1,5,1,1,2,3,4,2,2,"Scenario B"  
7 142,2,2,3,1,2,4,2,1,1,1,2,2,2,5,"Scenario B"  
8 142,2,2,1,1,3,3,4,1,1,2,3,1,3,5,"Scenario B"  
9 145,1,1,3,3,3,1,2,1,2,2,3,2,2,5,"Scenario B"  
10 145,1,2,3,2,1,1,4,2,1,2,3,4,5,3,"Scenario B"  
11 145,2,2,1,2,3,4,2,1,1,3,1,1,4,5,"Scenario A"  
12 145,1,2,1,1,3,2,1,2,1,1,2,4,3,1,"Scenario A"  
13 145,1,2,2,2,2,3,2,2,2,3,1,4,5,1,"Scenario B"  
14 145,2,1,2,1,2,1,4,1,1,1,3,2,5,2,"Scenario B"  
15 145,2,1,1,3,1,2,1,1,2,3,2,4,3,4,"Scenario A"  
16 145,1,1,3,3,1,5,2,2,2,2,1,3,1,3,"Scenario B"  
17 145,1,1,2,2,3,3,3,2,2,3,1,2,4,5,"Scenario A"  
18 145,1,2,2,3,1,5,4,2,1,3,2,4,2,5,"Scenario A"  
19 149,2,1,2,2,3,2,1,1,2,3,2,1,5,4,"Scenario B"  
20 149,1,2,2,3,2,1,5,2,1,1,1,4,3,3,"Scenario A"  
21 149,2,2,1,1,2,4,5,1,2,2,2,3,1,1,"Scenario B"  
22 149,1,1,3,3,1,4,1,2,2,1,2,4,3,2,"Scenario B"  
23 149,2,1,2,1,4,2,3,1,1,3,3,1,5,3,"Scenario B"  
24 149,2,2,3,1,1,1,1,1,1,1,3,3,3,4,"Scenario A"  
25 149,1,2,1,2,3,2,4,2,1,2,2,2,5,3,"Scenario A"  
26 149,2,2,3,3,4,3,5,2,1,2,1,3,5,2,"Scenario B"  
27 149,1,2,1,1,2,4,5,2,1,3,3,4,2,4,"Scenario B"  
28 149,1,1,2,2,2,1,1,2,2,3,1,1,1,2,"Scenario A"  
29 209,1,2,2,2,4,3,2,1,1,1,3,3,4,3,"Scenario A"  
30 209,2,1,3,1,2,5,4,1,2,1,3,4,2,1,"Scenario B"  
31 209,1,1,1,3,1,4,5,2,2,2,2,2,3,5,"Scenario A"  
32 209,2,1,2,2,1,4,1,1,2,2,1,3,1,2,"Scenario A"  
33 209,1,1,3,2,2,2,3,2,2,3,3,1,2,4,"Scenario B"  
34 209,2,1,1,1,4,1,2,1,2,3,2,2,5,3,"Scenario B"  
35 209,2,1,1,2,1,4,4,1,2,3,1,3,3,5,"Scenario A"  
36 209,2,2,2,3,3,5,4,1,2,2,3,4,4,1,"Scenario B"  
37 209,1,1,2,1,4,3,5,2,1,1,2,3,5,1,"Scenario B"  
38 209,1,1,3,1,1,1,2,2,2,3,3,2,4,1,"Scenario B"  
39 213,2,1,2,3,1,3,1,1,2,1,1,1,2,2,"Scenario A"  
40 213,1,1,2,1,2,2,3,2,2,3,2,4,1,2,"Scenario A"  
41 213,2,1,3,2,3,5,5,1,2,1,3,4,4,4,"Scenario A"  
42 213,1,2,3,3,1,4,3,2,1,1,1,2,1,4,"Scenario A"  
43 213,1,1,2,1,4,5,5,2,2,1,2,3,4,1,"Scenario B"  
44 213,2,1,2,3,1,1,3,1,2,2,1,2,3,1,"Scenario B"  
45 213,1,2,1,2,1,3,4,2,1,3,3,3,5,1,"Scenario B"  
46 213,2,2,3,2,1,1,5,1,1,2,3,4,2,2,"Scenario B"  
47 213,2,2,3,1,2,4,2,1,1,1,2,2,2,5,"Scenario A"  
48 213,2,2,1,1,3,3,4,1,1,2,3,1,3,5,"Scenario A"  
49 210,1,1,3,3,3,1,2,1,2,2,3,2,2,5,"Scenario A"  
50 210,1,2,3,2,1,1,4,2,1,2,3,4,5,3,"Scenario A"  
51 210,2,2,1,2,3,4,2,1,1,3,1,1,4,5,"Scenario A"  
52 210,1,2,1,1,3,2,1,2,1,1,2,4,3,1,"Scenario A"  
53 210,1,2,2,2,2,3,2,2,2,3,1,4,5,1,"Scenario B"  
54 210,2,1,2,1,2,1,4,1,1,1,3,2,5,2,"Scenario A"  
55 210,2,1,1,3,1,2,1,1,2,3,2,4,3,4,"Scenario A"  
56 210,1,1,3,3,1,5,2,2,2,2,1,3,1,3,"Scenario B"  
57 210,1,1,2,2,3,3,3,2,2,3,1,2,4,5,"Scenario A"  
58 210,1,2,2,3,1,5,4,2,1,3,2,4,2,5,"Scenario B"  
59 204,2,1,2,2,3,2,1,1,2,3,2,1,5,4,"Scenario A"  
60

1  
2  
3 204,1,2,2,3,2,1,5,2,1,1,1,4,3,3,"Scenario B"  
4 204,2,2,1,1,2,4,5,1,2,2,2,3,1,1,"Scenario A"  
5 204,1,1,3,3,1,4,1,2,2,1,2,4,3,2,"Scenario A"  
6 204,2,1,2,1,4,2,3,1,1,3,3,1,5,3,"Scenario A"  
7 204,2,2,3,1,1,1,1,1,1,1,3,3,3,4,"Scenario B"  
8 204,1,2,1,2,3,2,4,2,1,2,2,2,5,3,"Scenario A"  
9 204,2,2,3,3,4,3,5,2,1,2,1,3,5,2,"Scenario A"  
10 204,1,2,1,1,2,4,5,2,1,3,3,4,2,4,"Scenario A"  
11 204,1,1,2,2,2,1,1,2,2,3,1,1,1,2,"Scenario A"  
12 203,1,2,2,2,4,3,2,1,1,1,3,3,4,3,"Scenario A"  
13 203,2,1,3,1,2,5,4,1,2,1,3,4,2,1,"Scenario B"  
14 203,1,1,1,3,1,4,5,2,2,2,2,2,3,5,"Scenario B"  
15 203,2,1,2,2,1,4,1,1,2,2,1,3,1,2,"Scenario A"  
16 203,1,1,3,2,2,2,3,2,2,3,3,1,2,4,"Scenario A"  
17 203,2,1,1,1,4,1,2,1,2,3,2,2,5,3,"Scenario A"  
18 203,2,1,1,2,1,4,4,1,2,3,1,3,3,5,"Scenario A"  
19 203,2,2,2,3,3,5,4,1,2,2,3,4,4,1,"Scenario B"  
20 203,1,1,2,1,4,3,5,2,1,1,2,3,5,1,"Scenario B"  
21 203,1,1,3,1,1,1,2,2,2,3,3,2,4,1,"Scenario B"  
22 20,2,1,2,3,1,3,1,1,2,1,1,1,2,2,"Scenario A"  
23 20,1,1,2,1,2,2,3,2,2,3,2,4,1,2,"Scenario B"  
24 20,2,1,3,2,3,5,5,1,2,1,3,4,4,4,"Scenario B"  
25 20,1,2,3,3,1,4,3,2,1,1,1,2,1,4,"Scenario A"  
26 20,1,1,2,1,4,5,5,2,2,1,2,3,4,1,"Scenario B"  
27 20,2,1,2,3,1,1,3,1,2,2,1,2,3,1,"Scenario B"  
28 20,1,2,1,2,1,3,4,2,1,3,3,3,5,1,"Scenario B"  
29 20,2,2,3,2,1,1,5,1,1,2,3,4,2,2,"Scenario B"  
30 20,2,2,3,1,2,4,2,1,1,1,2,2,2,5,"Scenario A"  
31 20,2,2,1,1,3,3,4,1,1,2,3,1,3,5,"Scenario A"  
32 175,1,1,3,3,3,1,2,1,2,2,3,2,2,5,"Scenario A"  
33 175,1,2,3,2,1,1,4,2,1,2,3,4,5,3,"Scenario B"  
34 175,2,2,1,2,3,4,2,1,1,3,1,1,4,5,"Scenario A"  
35 175,1,2,1,1,3,2,1,2,1,1,2,4,3,1,"Scenario B"  
36 175,1,2,2,2,2,3,2,2,2,3,1,4,5,1,"Scenario B"  
37 175,2,1,2,1,2,1,4,1,1,1,3,2,5,2,"Scenario B"  
38 175,2,1,1,3,1,2,1,1,2,3,2,4,3,4,"Scenario A"  
39 175,1,1,3,3,1,5,2,2,2,2,1,3,1,3,"Scenario A"  
40 175,1,1,2,2,3,3,3,2,2,3,1,2,4,5,"Scenario A"  
41 175,1,2,2,3,1,5,4,2,1,3,2,4,2,5,"Scenario A"  
42 17,2,1,2,2,3,2,1,1,2,3,2,1,5,4,"Scenario A"  
43 17,1,2,2,3,2,1,5,2,1,1,1,4,3,3,"Scenario B"  
44 17,2,2,1,1,2,4,5,1,2,2,2,3,1,1,"Scenario B"  
45 17,1,1,3,3,1,4,1,2,2,1,2,4,3,2,"Scenario A"  
46 17,2,1,2,1,4,2,3,1,1,3,3,1,5,3,"Scenario A"  
47 17,2,2,3,1,1,1,1,1,1,1,3,3,3,4,"Scenario A"  
48 17,1,2,1,2,3,2,4,2,1,2,2,2,5,3,"Scenario A"  
49 17,2,2,3,3,4,3,5,2,1,2,1,3,5,2,"Scenario B"  
50 17,1,2,1,1,2,4,5,2,1,3,3,4,2,4,"Scenario B"  
51 17,1,1,2,2,2,2,1,1,2,2,3,1,1,1,2,"Scenario A"  
52 16,1,2,2,2,4,3,2,1,1,1,3,3,4,3,"Scenario A"  
53 16,2,1,3,1,2,5,4,1,2,1,3,4,2,1,"Scenario B"  
54 16,1,1,1,3,1,4,5,2,2,2,2,2,3,5,"Scenario B"  
55 16,2,1,2,2,1,4,1,1,2,2,1,3,1,2,"Scenario A"  
56 16,1,1,3,2,2,2,3,2,2,3,3,1,2,4,"Scenario A"  
57 16,2,1,1,1,4,1,2,1,2,3,2,2,5,3,"Scenario A"  
58 16,2,1,1,2,1,4,4,1,2,3,1,3,3,5,"Scenario A"  
59 16,2,2,2,3,3,5,4,1,2,2,3,4,4,1,"Scenario B"  
60

1  
2  
3 16,1,1,2,1,4,3,5,2,1,1,2,3,5,1,"Scenario B"  
4 16,1,1,3,1,1,1,2,2,2,3,3,2,4,1,"Scenario B"  
5 14,2,1,2,3,1,3,1,1,2,1,1,1,2,2,"Scenario A"  
6 14,1,1,2,1,2,2,3,2,2,3,2,4,1,2,"Scenario B"  
7 14,2,1,3,2,3,5,5,1,2,1,3,4,4,4,"Scenario B"  
8 14,1,2,3,3,1,4,3,2,1,1,1,2,1,4,"Scenario A"  
9 14,1,1,2,1,4,5,5,2,2,1,2,3,4,1,"Scenario B"  
10 14,2,1,2,3,1,1,3,1,2,2,1,2,3,1,"Scenario B"  
11 14,1,2,1,2,1,3,4,2,1,3,3,3,5,1,"Scenario B"  
12 14,2,2,3,2,1,1,5,1,1,2,3,4,2,2,"Scenario B"  
13 14,2,2,3,1,2,4,2,1,1,1,2,2,2,5,"Scenario A"  
14 14,2,2,1,1,3,3,4,1,1,2,3,1,3,5,"Scenario A"  
15 18,1,1,3,3,3,1,2,1,2,2,3,2,2,5,"Scenario B"  
16 18,1,2,3,2,1,1,4,2,1,2,3,4,5,3,"Scenario A"  
17 18,2,2,1,2,3,4,2,1,1,3,1,1,4,5,"Scenario B"  
18 18,1,2,1,1,3,2,1,2,1,1,2,4,3,1,"Scenario B"  
19 18,1,2,2,2,2,3,2,2,2,3,1,4,5,1,"Scenario A"  
20 18,2,1,2,1,2,1,4,1,1,1,3,2,5,2,"Scenario A"  
21 18,2,1,1,3,1,2,1,1,2,3,2,4,3,4,"Scenario B"  
22 18,1,1,3,3,1,5,2,2,2,2,1,3,1,3,"Scenario B"  
23 18,1,1,2,2,3,3,3,2,2,3,1,2,4,5,"Scenario B"  
24 18,1,2,2,3,1,5,4,2,1,3,2,4,2,5,"Scenario B"  
25 15,2,1,2,2,3,2,1,1,2,3,2,1,5,4,"Scenario A"  
26 15,1,2,2,3,2,1,5,2,1,1,1,4,3,3,"Scenario B"  
27 15,2,2,1,1,2,4,5,1,2,2,2,3,1,1,"Scenario B"  
28 15,1,1,3,3,1,4,1,2,2,1,2,4,3,2,"Scenario A"  
29 15,2,1,2,1,4,2,3,1,1,3,3,1,5,3,"Scenario A"  
30 15,2,2,3,1,1,1,1,1,1,1,3,3,3,4,"Scenario A"  
31 15,1,2,1,2,3,2,4,2,1,2,2,2,5,3,"Scenario B"  
32 15,2,2,3,3,4,3,5,2,1,2,1,3,5,2,"Scenario B"  
33 15,1,2,1,1,2,4,5,2,1,3,3,4,2,4,"Scenario B"  
34 15,1,1,2,2,2,1,1,2,2,3,1,1,1,2,"Scenario A"  
35 176,1,2,2,2,4,3,2,1,1,1,3,3,4,3,"Scenario A"  
36 176,2,1,3,1,2,5,4,1,2,1,3,4,2,1,"Scenario B"  
37 176,1,1,1,3,1,4,5,2,2,2,2,2,3,5,"Scenario B"  
38 176,2,1,2,2,1,4,1,1,2,2,1,3,1,2,"Scenario A"  
39 176,1,1,3,2,2,2,3,2,2,3,3,1,2,4,"Scenario A"  
40 176,2,1,1,1,4,1,2,1,2,3,2,2,5,3,"Scenario A"  
41 176,2,1,1,2,1,4,4,1,2,3,1,3,3,5,"Scenario A"  
42 176,2,2,2,3,3,5,4,1,2,2,3,4,4,1,"Scenario B"  
43 176,1,1,2,1,4,3,5,2,1,1,2,3,5,1,"Scenario B"  
44 176,1,1,3,1,1,1,2,2,2,3,3,2,4,1,"Scenario B"  
45 172,2,1,2,3,1,3,1,1,2,1,1,1,2,2,"Scenario A"  
46 172,1,1,2,1,2,2,3,2,2,3,2,4,1,2,"Scenario B"  
47 172,2,1,3,2,3,5,5,1,2,1,3,4,4,4,"Scenario B"  
48 172,1,2,3,3,1,4,3,2,1,1,1,2,1,4,"Scenario A"  
49 172,1,1,2,1,4,5,5,2,2,1,2,3,4,1,"Scenario B"  
50 172,2,1,2,3,1,1,3,1,2,2,1,2,3,1,"Scenario B"  
51 172,1,2,1,2,1,3,4,2,1,3,3,3,5,1,"Scenario B"  
52 172,2,2,3,2,1,1,5,1,1,2,3,4,2,2,"Scenario B"  
53 172,2,2,3,1,2,4,2,1,1,1,2,2,2,5,"Scenario A"  
54 172,2,2,1,1,3,3,4,1,1,2,3,1,3,5,"Scenario A"  
55 173,1,1,3,3,3,1,2,1,2,2,3,2,2,5,"Scenario A"  
56 173,1,2,3,2,1,1,4,2,1,2,3,4,5,3,"Scenario B"  
57 173,2,2,1,2,3,4,2,1,1,3,1,1,4,5,"Scenario A"  
58 173,1,2,1,1,3,2,1,2,1,1,2,4,3,1,"Scenario A"  
59 173,1,2,2,2,2,3,2,2,2,3,1,4,5,1,"Scenario B"  
60

1  
2  
3 173,2,1,2,1,2,1,4,1,1,1,3,2,5,2,"Scenario B"  
4 173,2,1,1,3,1,2,1,1,2,3,2,4,3,4,"Scenario A"  
5 173,1,1,3,3,1,5,2,2,2,2,1,3,1,3,"Scenario A"  
6 173,1,1,2,2,3,3,3,2,2,3,1,2,4,5,"Scenario A"  
7 173,1,2,2,3,1,5,4,2,1,3,2,4,2,5,"Scenario A"  
8 171,2,1,2,2,3,2,1,1,2,3,2,1,5,4,"Scenario A"  
9 171,1,2,2,3,2,1,5,2,1,1,1,4,3,3,"Scenario B"  
10 171,2,2,1,1,2,4,5,1,2,2,2,3,1,1,"Scenario B"  
11 171,1,1,3,3,1,4,1,2,2,1,2,4,3,2,"Scenario A"  
12 171,2,1,2,1,4,2,3,1,1,3,3,1,5,3,"Scenario A"  
13 171,2,2,3,1,1,1,1,1,1,1,3,3,3,4,"Scenario A"  
14 171,1,2,1,2,3,2,4,2,1,2,2,2,5,3,"Scenario B"  
15 171,2,2,3,3,4,3,5,2,1,2,1,3,5,2,"Scenario B"  
16 171,1,2,1,1,2,4,5,2,1,3,3,4,2,4,"Scenario B"  
17 171,1,1,2,2,2,1,1,2,2,3,1,1,1,2,"Scenario A"  
18 174,1,2,2,2,4,3,2,1,1,1,3,3,4,3,"Scenario A"  
19 174,2,1,3,1,2,5,4,1,2,1,3,4,2,1,"Scenario B"  
20 174,1,1,1,3,1,4,5,2,2,2,2,2,3,5,"Scenario B"  
21 174,2,1,2,2,1,4,1,1,2,2,1,3,1,2,"Scenario A"  
22 174,1,1,3,2,2,2,3,2,2,3,3,1,2,4,"Scenario A"  
23 174,2,1,1,1,4,1,2,1,2,3,2,2,5,3,"Scenario A"  
24 174,2,1,1,2,1,4,4,1,2,3,1,3,3,5,"Scenario A"  
25 174,2,2,2,3,3,5,4,1,2,2,3,4,4,1,"Scenario B"  
26 174,1,1,2,1,4,3,5,2,1,1,2,3,5,1,"Scenario B"  
27 174,1,1,3,1,1,1,2,2,2,3,3,2,4,1,"Scenario B"  
28 19,2,1,2,3,1,3,1,1,2,1,1,1,2,2,"Scenario A"  
29 19,1,1,2,1,2,2,3,2,2,3,2,4,1,2,"Scenario B"  
30 19,2,1,3,2,3,5,5,1,2,1,3,4,4,4,"Scenario B"  
31 19,1,2,3,3,1,4,3,2,1,1,1,2,1,4,"Scenario A"  
32 19,1,1,2,1,4,5,5,2,2,1,2,3,4,1,"Scenario B"  
33 19,2,1,2,3,1,1,3,1,2,2,1,2,3,1,"Scenario B"  
34 19,1,2,1,2,1,3,4,2,1,3,3,3,5,1,"Scenario B"  
35 19,2,2,3,2,1,1,5,1,1,2,3,4,2,2,"Scenario B"  
36 19,2,2,3,1,2,4,2,1,1,1,2,2,2,5,"Scenario A"  
37 19,2,2,1,1,3,3,4,1,1,2,3,1,3,5,"Scenario A"  
38 170,1,1,3,3,3,1,2,1,2,2,3,2,2,5,"Scenario A"  
39 170,1,2,3,2,1,1,4,2,1,2,3,4,5,3,"Scenario B"  
40 170,2,2,1,2,3,4,2,1,1,3,1,1,4,5,"Scenario A"  
41 170,1,2,1,1,3,2,1,2,1,1,2,4,3,1,"Scenario A"  
42 170,1,2,2,2,2,3,2,2,2,3,1,4,5,1,"Scenario B"  
43 170,2,1,2,1,2,1,4,1,1,1,3,2,5,2,"Scenario B"  
44 170,2,1,1,3,1,2,1,1,2,3,2,4,3,4,"Scenario A"  
45 170,1,1,3,3,1,5,2,2,2,2,1,3,1,3,"Scenario A"  
46 170,1,1,2,2,3,3,3,2,2,3,1,2,4,5,"Scenario A"  
47 170,1,2,2,3,1,5,4,2,1,3,2,4,2,5,"Scenario A"  
48 178,2,1,2,2,3,2,1,1,2,3,2,1,5,4,"Scenario B"  
49 178,1,2,2,3,2,1,5,2,1,1,1,4,3,3,"Scenario B"  
50 178,2,2,1,1,2,4,5,1,2,2,2,3,1,1,"Scenario B"  
51 178,1,1,3,3,1,4,1,2,2,1,2,4,3,2,"Scenario B"  
52 178,2,1,2,1,4,2,3,1,1,3,3,1,5,3,"Scenario B"  
53 178,2,2,3,1,1,1,1,1,1,1,3,3,3,4,"Scenario A"  
54 178,1,2,1,2,3,2,4,2,1,2,2,2,5,3,"Scenario A"  
55 178,2,2,3,3,4,3,5,2,1,2,1,3,5,2,"Scenario A"  
56 178,1,2,1,1,2,4,5,2,1,3,3,4,2,4,"Scenario A"  
57 178,1,1,2,2,2,1,1,2,2,3,1,1,1,2,"Scenario B"  
58 468,1,2,2,2,4,3,2,1,1,1,3,3,4,3,"Scenario B"  
59 468,2,1,3,1,2,5,4,1,2,1,3,4,2,1,"Scenario A"  
60



1  
2  
3 468,1,1,1,3,1,4,5,2,2,2,2,2,3,5,"Scenario A"  
4 468,2,1,2,2,1,4,1,1,2,2,1,3,1,2,"Scenario A"  
5 468,1,1,3,2,2,2,3,2,2,3,3,1,2,4,"Scenario A"  
6 468,2,1,1,1,4,1,2,1,2,3,2,2,5,3,"Scenario B"  
7 468,2,1,1,2,1,4,4,1,2,3,1,3,3,5,"Scenario A"  
8 468,2,2,2,3,3,5,4,1,2,2,3,4,4,1,"Scenario B"  
9 468,1,1,2,1,4,3,5,2,1,1,2,3,5,1,"Scenario B"  
10 468,1,1,3,1,1,1,2,2,2,3,3,2,4,1,"Scenario B"  
11 251,2,1,2,3,1,3,1,1,2,1,1,1,2,2,"Scenario A"  
12 251,1,1,2,1,2,2,3,2,2,3,2,4,1,2,"Scenario B"  
13 251,2,1,3,2,3,5,5,1,2,1,3,4,4,4,"Scenario A"  
14 251,1,2,3,3,1,4,3,2,1,1,1,2,1,4,"Scenario A"  
15 251,1,1,2,1,4,5,5,2,2,1,2,3,4,1,"Scenario A"  
16 251,2,1,2,3,1,1,3,1,2,2,1,2,3,1,"Scenario A"  
17 251,1,2,1,2,1,3,4,2,1,3,3,3,5,1,"Scenario B"  
18 251,2,2,3,2,1,1,5,1,1,2,3,4,2,2,"Scenario A"  
19 251,2,2,3,1,2,4,2,1,1,1,2,2,2,5,"Scenario A"  
20 251,2,2,1,1,3,3,4,1,1,2,3,1,3,5,"Scenario B"  
21 258,1,1,3,3,3,1,2,1,2,2,3,2,2,5,"Scenario B"  
22 258,1,2,3,2,1,1,4,2,1,2,3,4,5,3,"Scenario A"  
23 258,2,2,1,2,3,4,2,1,1,3,1,1,4,5,"Scenario A"  
24 258,1,2,1,1,3,2,1,2,1,1,2,4,3,1,"Scenario B"  
25 258,1,2,2,2,2,3,2,2,2,3,1,4,5,1,"Scenario A"  
26 258,2,1,2,1,2,1,4,1,1,1,3,2,5,2,"Scenario B"  
27 258,2,1,1,3,1,2,1,1,2,3,2,4,3,4,"Scenario A"  
28 258,1,1,3,3,1,5,2,2,2,2,1,3,1,3,"Scenario A"  
29 258,1,1,2,2,3,3,3,2,2,3,1,2,4,5,"Scenario A"  
30 258,1,2,2,3,1,5,4,2,1,3,2,4,2,5,"Scenario A"  
31 246,2,1,2,2,3,2,1,1,2,3,2,1,5,4,"Scenario A"  
32 246,1,2,2,3,2,1,5,2,1,1,1,4,3,3,"Scenario A"  
33 246,2,2,1,1,2,4,5,1,2,2,2,3,1,1,"Scenario B"  
34 246,1,1,3,3,1,4,1,2,2,1,2,4,3,2,"Scenario A"  
35 246,2,1,2,1,4,2,3,1,1,3,3,1,5,3,"Scenario B"  
36 246,2,2,3,1,1,1,1,1,1,1,3,3,3,4,"Scenario A"  
37 246,1,2,1,2,3,2,4,2,1,2,2,2,5,3,"Scenario B"  
38 246,2,2,3,3,4,3,5,2,1,2,1,3,5,2,"Scenario A"  
39 246,1,2,1,1,2,4,5,2,1,3,3,4,2,4,"Scenario B"  
40 246,1,1,2,2,2,1,1,2,2,3,1,1,1,2,"Scenario A"  
41 475,1,2,2,2,4,3,2,1,1,1,3,3,4,3,"Scenario B"  
42 475,2,1,3,1,2,5,4,1,2,1,3,4,2,1,"Scenario A"  
43 475,1,1,1,3,1,4,5,2,2,2,2,2,3,5,"Scenario B"  
44 475,2,1,2,2,1,4,1,1,2,2,1,3,1,2,"Scenario A"  
45 475,1,1,3,2,2,2,3,2,2,3,3,1,2,4,"Scenario B"  
46 475,2,1,1,1,4,1,2,1,2,3,2,2,5,3,"Scenario A"  
47 475,2,1,1,2,1,4,4,1,2,3,1,3,3,5,"Scenario B"  
48 475,2,2,2,3,3,5,4,1,2,2,3,4,4,1,"Scenario B"  
49 475,1,1,2,1,4,3,5,2,1,1,2,3,5,1,"Scenario A"  
50 475,1,1,3,1,1,1,2,2,2,3,3,2,4,1,"Scenario B"  
51 439,2,1,2,3,1,3,1,1,2,1,1,1,2,2,"Scenario B"  
52 439,1,1,2,1,2,2,3,2,2,3,2,4,1,2,"Scenario A"  
53 439,2,1,3,2,3,5,5,1,2,1,3,4,4,4,"Scenario B"  
54 439,1,2,3,3,1,4,3,2,1,1,1,2,1,4,"Scenario B"  
55 439,1,1,2,1,4,5,5,2,2,1,2,3,4,1,"Scenario A"  
56 439,2,1,2,3,1,1,3,1,2,2,1,2,3,1,"Scenario A"  
57 439,1,2,1,2,1,3,4,2,1,3,3,3,5,1,"Scenario A"  
58 439,2,2,3,2,1,1,5,1,1,2,3,4,2,2,"Scenario A"  
59 439,2,2,3,1,2,4,2,1,1,1,2,2,2,5,"Scenario A"  
60

1  
2  
3 439,2,2,1,1,3,3,4,1,1,2,3,1,3,5,"Scenario A"  
4 247,1,1,3,3,3,1,2,1,2,2,3,2,2,5,"Scenario A"  
5 247,1,2,3,2,1,1,4,2,1,2,3,4,5,3,"Scenario A"  
6 247,2,2,1,2,3,4,2,1,1,3,1,1,4,5,"Scenario B"  
7 247,1,2,1,1,3,2,1,2,1,1,2,4,3,1,"Scenario A"  
8 247,1,2,2,2,2,3,2,2,2,3,1,4,5,1,"Scenario B"  
9 247,2,1,2,1,2,1,4,1,1,1,3,2,5,2,"Scenario A"  
10 247,2,1,1,3,1,2,1,1,2,3,2,4,3,4,"Scenario B"  
11 247,1,1,3,3,1,5,2,2,2,2,1,3,1,3,"Scenario A"  
12 247,1,1,2,2,3,3,3,2,2,3,1,2,4,5,"Scenario B"  
13 247,1,2,2,3,1,5,4,2,1,3,2,4,2,5,"Scenario B"  
14 248,2,1,2,2,3,2,1,1,2,3,2,1,5,4,"Scenario A"  
15 248,1,2,2,3,2,1,5,2,1,1,1,4,3,3,"Scenario B"  
16 248,2,2,1,1,2,4,5,1,2,2,2,3,1,1,"Scenario A"  
17 248,1,1,3,3,1,4,1,2,2,1,2,4,3,2,"Scenario A"  
18 248,2,1,2,1,4,2,3,1,1,3,3,1,5,3,"Scenario B"  
19 248,2,2,3,1,1,1,1,1,1,1,3,3,3,4,"Scenario A"  
20 248,1,2,1,2,3,2,4,2,1,2,2,2,5,3,"Scenario B"  
21 248,2,2,3,3,4,3,5,2,1,2,1,3,5,2,"Scenario B"  
22 248,1,2,1,1,2,4,5,2,1,3,3,4,2,4,"Scenario B"  
23 248,1,1,2,2,2,1,1,2,2,3,1,1,1,2,"Scenario B"  
24 255,1,2,2,2,4,3,2,1,1,1,3,3,4,3,"Scenario B"  
25 255,2,1,3,1,2,5,4,1,2,1,3,4,2,1,"Scenario B"  
26 255,1,1,1,3,1,4,5,2,2,2,2,2,3,5,"Scenario B"  
27 255,2,1,2,2,1,4,1,1,2,2,1,3,1,2,"Scenario A"  
28 255,1,1,3,2,2,2,3,2,2,3,3,1,2,4,"Scenario B"  
29 255,2,1,1,1,4,1,2,1,2,3,2,2,5,3,"Scenario B"  
30 255,2,1,1,2,1,4,4,1,2,3,1,3,3,5,"Scenario B"  
31 255,2,2,2,3,3,5,4,1,2,2,3,4,4,1,"Scenario B"  
32 255,1,1,2,1,4,3,5,2,1,1,2,3,5,1,"Scenario B"  
33 255,1,1,3,1,1,1,2,2,2,3,3,2,4,1,"Scenario B"  
34 254,2,1,2,3,1,3,1,1,2,1,1,1,2,2,"Scenario A"  
35 254,1,1,2,1,2,2,3,2,2,3,2,4,1,2,"Scenario B"  
36 254,2,1,3,2,3,5,5,1,2,1,3,4,4,4,"Scenario A"  
37 254,1,2,3,3,1,4,3,2,1,1,1,2,1,4,"Scenario A"  
38 254,1,1,2,1,4,5,5,2,2,1,2,3,4,1,"Scenario B"  
39 254,2,1,2,3,1,1,3,1,2,2,1,2,3,1,"Scenario B"  
40 254,1,2,1,2,1,3,4,2,1,3,3,3,5,1,"Scenario B"  
41 254,2,2,3,2,1,1,5,1,1,2,3,4,2,2,"Scenario B"  
42 254,2,2,3,1,2,4,2,1,1,1,2,2,2,5,"Scenario A"  
43 254,2,2,1,1,3,3,4,1,1,2,3,1,3,5,"Scenario A"  
44 465,1,1,3,3,3,1,2,1,2,2,3,2,2,5,"Scenario B"  
45 465,1,2,3,2,1,1,4,2,1,2,3,4,5,3,"Scenario A"  
46 465,2,2,1,2,3,4,2,1,1,3,1,1,4,5,"Scenario A"  
47 465,1,2,1,1,3,2,1,2,1,1,2,4,3,1,"Scenario B"  
48 465,1,2,2,2,3,2,2,2,3,1,4,5,1,"Scenario A"  
49 465,2,1,2,1,2,1,4,1,1,1,3,2,5,2,"Scenario A"  
50 465,2,1,1,3,1,2,1,1,2,3,2,4,3,4,"Scenario B"  
51 465,1,1,3,3,1,5,2,2,2,2,1,3,1,3,"Scenario A"  
52 465,1,1,2,2,3,3,3,2,2,3,1,2,4,5,"Scenario B"  
53 465,1,2,2,3,1,5,4,2,1,3,2,4,2,5,"Scenario A"  
54 471,2,1,2,2,3,2,1,1,2,3,2,1,5,4,"Scenario B"  
55 471,1,2,2,3,2,1,5,2,1,1,1,4,3,3,"Scenario B"  
56 471,2,2,1,1,2,4,5,1,2,2,2,3,1,1,"Scenario B"  
57 471,1,1,3,3,1,4,1,2,2,1,2,4,3,2,"Scenario A"  
58 471,2,1,2,1,4,2,3,1,1,3,3,1,5,3,"Scenario B"  
59 471,2,2,3,1,1,1,1,1,1,1,3,3,3,4,"Scenario A"  
60

1  
2  
3 471,1,2,1,2,3,2,4,2,1,2,2,2,5,3,"Scenario B"  
4 471,2,2,3,3,4,3,5,2,1,2,1,3,5,2,"Scenario B"  
5 471,1,2,1,1,2,4,5,2,1,3,3,4,2,4,"Scenario B"  
6 471,1,1,2,2,2,1,1,2,2,3,1,1,1,2,"Scenario A"  
7 252,1,2,2,2,4,3,2,1,1,1,3,3,4,3,"Scenario B"  
8 252,2,1,3,1,2,5,4,1,2,1,3,4,2,1,"Scenario A"  
9 252,1,1,1,3,1,4,5,2,2,2,2,2,3,5,"Scenario A"  
10 252,2,1,2,2,1,4,1,1,2,2,1,3,1,2,"Scenario A"  
11 252,1,1,3,2,2,2,3,2,2,3,3,1,2,4,"Scenario B"  
12 252,2,1,1,1,4,1,2,1,2,3,2,2,5,3,"Scenario B"  
13 252,2,1,1,2,1,4,4,1,2,3,1,3,3,5,"Scenario A"  
14 252,2,2,2,3,3,5,4,1,2,2,3,4,4,1,"Scenario A"  
15 252,1,1,2,1,4,3,5,2,1,1,2,3,5,1,"Scenario B"  
16 252,1,1,3,1,1,1,2,2,2,3,3,2,4,1,"Scenario A"  
17 470,2,1,2,3,1,3,1,1,2,1,1,1,2,2,"Scenario A"  
18 470,1,1,2,1,2,2,3,2,2,3,2,4,1,2,"Scenario A"  
19 470,2,1,3,2,3,5,5,1,2,1,3,4,4,4,"Scenario A"  
20 470,1,2,3,3,1,4,3,2,1,1,1,2,1,4,"Scenario A"  
21 470,1,1,2,1,4,5,5,2,2,1,2,3,4,1,"Scenario A"  
22 470,2,1,2,3,1,1,3,1,2,2,1,2,3,1,"Scenario A"  
23 470,1,2,1,2,1,3,4,2,1,3,3,3,5,1,"Scenario B"  
24 470,2,2,3,2,1,1,5,1,1,2,3,4,2,2,"Scenario A"  
25 470,2,2,3,1,2,4,2,1,1,1,2,2,2,5,"Scenario A"  
26 470,2,2,1,1,3,3,4,1,1,2,3,1,3,5,"Scenario A"  
27 474,1,1,3,3,3,1,2,1,2,2,3,2,2,5,"Scenario A"  
28 474,1,2,3,2,1,1,4,2,1,2,3,4,5,3,"Scenario B"  
29 474,2,2,1,2,3,4,2,1,1,3,1,1,4,5,"Scenario B"  
30 474,1,2,1,1,3,2,1,2,1,1,2,4,3,1,"Scenario A"  
31 474,1,2,2,2,2,3,2,2,2,3,1,4,5,1,"Scenario B"  
32 474,2,1,2,1,2,1,4,1,1,1,1,3,2,5,2,"Scenario B"  
33 474,2,1,1,3,1,2,1,1,2,3,2,4,3,4,"Scenario A"  
34 474,1,1,3,3,1,5,2,2,2,2,1,3,1,3,"Scenario A"  
35 474,1,1,2,2,3,3,3,2,2,3,1,2,4,5,"Scenario A"  
36 474,1,2,2,3,1,5,4,2,1,3,2,4,2,5,"Scenario A"  
37 257,2,1,2,2,3,2,1,1,2,3,2,1,5,4,"Scenario A"  
38 257,1,2,2,3,2,1,5,2,1,1,1,4,3,3,"Scenario A"  
39 257,2,2,1,1,2,4,5,1,2,2,2,3,1,1,"Scenario B"  
40 257,1,1,3,3,1,4,1,2,2,1,2,4,3,2,"Scenario A"  
41 257,2,1,2,1,4,2,3,1,1,3,3,1,5,3,"Scenario B"  
42 257,2,2,3,1,1,1,1,1,1,1,3,3,3,4,"Scenario A"  
43 257,1,2,1,2,3,2,4,2,1,2,2,2,5,3,"Scenario A"  
44 257,2,2,3,3,4,3,5,2,1,2,1,3,5,2,"Scenario A"  
45 257,1,2,1,1,2,4,5,2,1,3,3,4,2,4,"Scenario B"  
46 257,1,1,2,2,2,1,1,2,2,3,1,1,1,2,"Scenario A"  
47 467,1,2,2,2,4,3,2,1,1,1,3,3,4,3,"Scenario A"  
48 467,2,1,3,1,2,5,4,1,2,1,3,4,2,1,"Scenario B"  
49 467,1,1,1,3,1,4,5,2,2,2,2,2,3,5,"Scenario B"  
50 467,2,1,2,2,1,4,1,1,2,2,1,3,1,2,"Scenario A"  
51 467,1,1,3,2,2,2,3,2,2,3,3,1,2,4,"Scenario B"  
52 467,2,1,1,1,4,1,2,1,2,3,2,2,5,3,"Scenario B"  
53 467,2,1,1,2,1,4,4,1,2,3,1,3,3,5,"Scenario A"  
54 467,2,2,2,3,3,5,4,1,2,2,3,4,4,1,"Scenario B"  
55 467,1,1,2,1,4,3,5,2,1,1,2,3,5,1,"Scenario B"  
56 467,1,1,3,1,1,1,2,2,2,3,3,2,4,1,"Scenario B"  
57 473,2,1,2,3,1,3,1,1,2,1,1,1,2,2,"Scenario A"  
58 473,1,1,2,1,2,2,3,2,2,3,2,4,1,2,"Scenario A"  
59 473,2,1,3,2,3,5,5,1,2,1,3,4,4,4,"Scenario B"  
60

1  
2  
3 473,1,2,3,3,1,4,3,2,1,1,1,2,1,4,"Scenario A"  
4 473,1,1,2,1,4,5,5,2,2,1,2,3,4,1,"Scenario B"  
5 473,2,1,2,3,1,1,3,1,2,2,1,2,3,1,"Scenario B"  
6 473,1,2,1,2,1,3,4,2,1,3,3,3,5,1,"Scenario B"  
7 473,2,2,3,2,1,1,5,1,1,2,3,4,2,2,"Scenario B"  
8 473,2,2,3,1,2,4,2,1,1,1,2,2,2,5,"Scenario A"  
9 473,2,2,1,1,3,3,4,1,1,2,3,1,3,5,"Scenario A"  
10 241,1,1,3,3,3,1,2,1,2,2,3,2,2,5,"Scenario B"  
11 241,1,2,3,2,1,1,4,2,1,2,3,4,5,3,"Scenario A"  
12 241,2,2,1,2,3,4,2,1,1,3,1,1,4,5,"Scenario B"  
13 241,1,2,1,1,3,2,1,2,1,1,2,4,3,1,"Scenario B"  
14 241,1,2,2,2,2,3,2,2,2,3,1,4,5,1,"Scenario A"  
15 241,2,1,2,1,2,2,1,4,1,1,1,3,2,5,2,"Scenario B"  
16 241,2,1,1,3,1,2,1,1,2,3,2,4,3,4,"Scenario B"  
17 241,1,1,3,3,1,5,2,2,2,2,1,3,1,3,"Scenario A"  
18 241,1,1,2,2,3,3,3,2,2,3,1,2,4,5,"Scenario B"  
19 241,1,2,2,3,1,5,4,2,1,3,2,4,2,5,"Scenario B"  
20 256,2,1,2,2,3,2,1,1,2,3,2,1,5,4,"Scenario B"  
21 256,1,2,2,3,2,1,5,2,1,1,1,4,3,3,"Scenario A"  
22 256,2,2,1,1,2,4,5,1,2,2,2,3,1,1,"Scenario A"  
23 256,1,1,3,3,1,4,1,2,2,1,2,4,3,2,"Scenario A"  
24 256,2,1,2,1,4,2,3,1,1,3,3,1,5,3,"Scenario A"  
25 256,2,2,3,1,1,1,1,1,1,1,3,3,3,4,"Scenario A"  
26 256,1,2,1,2,3,2,4,2,1,2,2,2,5,3,"Scenario B"  
27 256,2,2,3,3,4,3,5,2,1,2,1,3,5,2,"Scenario B"  
28 256,1,2,1,1,2,4,5,2,1,3,3,4,2,4,"Scenario A"  
29 256,1,1,2,2,2,1,1,2,2,3,1,1,1,2,"Scenario A"  
30 250,1,2,2,2,4,3,2,1,1,1,3,3,4,3,"Scenario A"  
31 250,2,1,3,1,2,5,4,1,2,1,3,4,2,1,"Scenario B"  
32 250,1,1,1,3,1,4,5,2,2,2,2,2,3,5,"Scenario A"  
33 250,2,1,2,2,1,4,1,1,2,2,1,3,1,2,"Scenario A"  
34 250,1,1,3,2,2,2,3,2,2,3,3,1,2,4,"Scenario A"  
35 250,2,1,1,1,4,1,2,1,2,3,2,2,5,3,"Scenario B"  
36 250,2,1,1,2,1,4,4,1,2,3,1,3,3,5,"Scenario B"  
37 250,2,2,2,3,3,5,4,1,2,2,3,4,4,1,"Scenario A"  
38 250,1,1,2,1,4,3,5,2,1,1,2,3,5,1,"Scenario B"  
39 250,1,1,3,1,1,1,2,2,2,3,3,2,4,1,"Scenario B"  
40 249,2,1,2,3,1,3,1,1,2,1,1,1,2,2,"Scenario A"  
41 249,1,1,2,1,2,2,3,2,2,3,2,4,1,2,"Scenario B"  
42 249,2,1,3,2,3,5,5,1,2,1,3,4,4,4,"Scenario B"  
43 249,1,2,3,3,1,4,3,2,1,1,1,2,1,4,"Scenario A"  
44 249,1,1,2,1,4,5,5,2,2,1,2,3,4,1,"Scenario B"  
45 249,2,1,2,3,1,1,3,1,2,2,1,2,3,1,"Scenario A"  
46 249,1,2,1,2,1,3,4,2,1,3,3,3,5,1,"Scenario B"  
47 249,2,2,3,2,1,1,5,1,1,2,3,4,2,2,"Scenario B"  
48 249,2,2,3,1,2,4,2,1,1,1,2,2,2,5,"Scenario A"  
49 249,2,2,1,1,3,3,4,1,1,2,3,1,3,5,"Scenario A"  
50 469,1,1,3,3,3,1,2,1,2,2,3,2,2,5,"Scenario B"  
51 469,1,2,3,2,1,1,4,2,1,2,3,4,5,3,"Scenario B"  
52 469,2,2,1,2,3,4,2,1,1,3,1,1,4,5,"Scenario A"  
53 469,1,2,1,1,3,2,1,2,1,1,2,4,3,1,"Scenario A"  
54 469,1,2,2,2,2,3,2,2,2,3,1,4,5,1,"Scenario A"  
55 469,2,1,2,1,2,1,4,1,1,1,3,2,5,2,"Scenario B"  
56 469,2,1,1,3,1,2,1,1,2,3,2,4,3,4,"Scenario A"  
57 469,1,1,3,3,1,5,2,2,2,2,1,3,1,3,"Scenario A"  
58 469,1,1,2,2,3,3,3,2,2,3,1,2,4,5,"Scenario A"  
59 469,1,2,2,3,1,5,4,2,1,3,2,4,2,5,"Scenario A"  
60

1  
2  
3 253,2,1,2,2,3,2,1,1,2,3,2,1,5,4,"Scenario B"  
4 253,1,2,2,3,2,1,5,2,1,1,1,4,3,3,"Scenario A"  
5 253,2,2,1,1,2,4,5,1,2,2,2,3,1,1,"Scenario B"  
6 253,1,1,3,3,1,4,1,2,2,1,2,4,3,2,"Scenario A"  
7 253,2,1,2,1,4,2,3,1,1,3,3,1,5,3,"Scenario B"  
8 253,2,2,3,1,1,1,1,1,1,1,3,3,3,4,"Scenario B"  
9 253,1,2,1,2,3,2,4,2,1,2,2,2,5,3,"Scenario A"  
10 253,2,2,3,3,4,3,5,2,1,2,1,3,5,2,"Scenario A"  
11 253,1,2,1,1,2,4,5,2,1,3,3,4,2,4,"Scenario B"  
12 253,1,1,2,2,2,1,1,2,2,3,1,1,1,2,"Scenario A"  
13 466,1,2,2,2,4,3,2,1,1,1,3,3,4,3,"Scenario A"  
14 466,2,1,3,1,2,5,4,1,2,1,3,4,2,1,"Scenario B"  
15 466,1,1,1,3,1,4,5,2,2,2,2,2,3,5,"Scenario B"  
16 466,2,1,2,2,1,4,1,1,2,2,1,3,1,2,"Scenario A"  
17 466,1,1,3,2,2,2,3,2,2,3,3,1,2,4,"Scenario A"  
18 466,2,1,1,1,4,1,2,1,2,3,2,2,5,3,"Scenario B"  
19 466,2,1,1,2,1,4,4,1,2,3,1,3,3,5,"Scenario A"  
20 466,2,2,2,3,3,5,4,1,2,2,3,4,4,1,"Scenario B"  
21 466,1,1,2,1,4,3,5,2,1,1,2,3,5,1,"Scenario B"  
22 466,1,1,3,1,1,1,2,2,2,3,3,2,4,1,"Scenario B"  
23 224,2,1,2,3,1,3,1,1,2,1,1,1,2,2,"Scenario A"  
24 224,1,1,2,1,2,2,3,2,2,3,2,4,1,2,"Scenario B"  
25 224,2,1,3,2,3,5,5,1,2,1,3,4,4,4,"Scenario B"  
26 224,1,2,3,3,1,4,3,2,1,1,1,2,1,4,"Scenario B"  
27 224,1,1,2,1,4,5,5,2,2,1,2,3,4,1,"Scenario B"  
28 224,2,1,2,3,1,1,3,1,2,2,1,2,3,1,"Scenario B"  
29 224,1,2,1,2,1,3,4,2,1,3,3,3,5,1,"Scenario B"  
30 224,2,2,3,2,1,1,5,1,1,2,3,4,2,2,"Scenario B"  
31 224,2,2,3,1,2,4,2,1,1,1,2,2,2,5,"Scenario B"  
32 224,2,2,1,1,3,3,4,1,1,2,3,1,3,5,"Scenario B"  
33 219,1,1,3,3,3,1,2,1,2,2,3,2,2,5,"Scenario A"  
34 219,1,2,3,2,1,1,4,2,1,2,3,4,5,3,"Scenario B"  
35 219,2,2,1,2,3,4,2,1,1,3,1,1,4,5,"Scenario B"  
36 219,1,2,1,1,3,2,1,2,1,1,2,4,3,1,"Scenario B"  
37 219,1,2,2,2,2,3,2,2,2,3,1,4,5,1,"Scenario A"  
38 219,2,1,2,1,2,1,4,1,1,1,3,2,5,2,"Scenario B"  
39 219,2,1,1,3,1,2,1,1,2,3,2,4,3,4,"Scenario A"  
40 219,1,1,3,3,1,5,2,2,2,2,1,3,1,3,"Scenario B"  
41 219,1,1,2,2,3,3,3,2,2,3,1,2,4,5,"Scenario B"  
42 219,1,2,2,3,1,5,4,2,1,3,2,4,2,5,"Scenario B"  
43 226,2,1,2,2,3,2,1,1,2,3,2,1,5,4,"Scenario A"  
44 226,1,2,2,3,2,1,5,2,1,1,1,4,3,3,"Scenario A"  
45 226,2,2,1,1,2,4,5,1,2,2,2,3,1,1,"Scenario A"  
46 226,1,1,3,3,1,4,1,2,2,1,2,4,3,2,"Scenario B"  
47 226,2,1,2,1,4,2,3,1,1,3,3,1,5,3,"Scenario B"  
48 226,2,2,3,1,1,1,1,1,1,1,3,3,3,4,"Scenario A"  
49 226,1,2,1,2,3,2,4,2,1,2,2,2,5,3,"Scenario B"  
50 226,2,2,3,3,4,3,5,2,1,2,1,3,5,2,"Scenario B"  
51 226,1,2,1,1,2,4,5,2,1,3,3,4,2,4,"Scenario A"  
52 226,1,1,2,2,2,1,1,2,2,3,1,1,1,2,"Scenario B"  
53 222,1,2,2,2,4,3,2,1,1,1,3,3,4,3,"Scenario A"  
54 222,2,1,3,1,2,5,4,1,2,1,3,4,2,1,"Scenario B"  
55 222,1,1,1,3,1,4,5,2,2,2,2,2,3,5,"Scenario B"  
56 222,2,1,2,2,1,4,1,1,2,2,1,3,1,2,"Scenario A"  
57 222,1,1,3,2,2,2,3,2,2,3,3,1,2,4,"Scenario B"  
58 222,2,1,1,1,4,1,2,1,2,3,2,2,5,3,"Scenario B"  
59 222,2,1,1,2,1,4,4,1,2,3,1,3,3,5,"Scenario A"  
60

1  
2  
3 222,2,2,2,3,3,5,4,1,2,2,3,4,4,1,"Scenario B"  
4 222,1,1,2,1,4,3,5,2,1,1,2,3,5,1,"Scenario B"  
5 222,1,1,3,1,1,1,2,2,2,3,3,2,4,1,"Scenario B"  
6 227,2,1,2,3,1,3,1,1,2,1,1,1,2,2,"Scenario A"  
7 227,1,1,2,1,2,2,3,2,2,3,2,4,1,2,"Scenario B"  
8 227,2,1,3,2,3,5,5,1,2,1,3,4,4,4,"Scenario A"  
9 227,1,2,3,3,1,4,3,2,1,1,1,2,1,4,"Scenario A"  
10 227,1,1,2,1,4,5,5,2,2,1,2,3,4,1,"Scenario B"  
11 227,2,1,2,3,1,1,3,1,2,2,1,2,3,1,"Scenario B"  
12 227,1,2,1,2,1,3,4,2,1,3,3,3,5,1,"Scenario A"  
13 227,2,2,3,2,1,1,5,1,1,2,3,4,2,2,"Scenario A"  
14 227,2,2,3,1,2,4,2,1,1,1,2,2,2,5,"Scenario A"  
15 227,2,2,1,1,3,3,4,1,1,2,3,1,3,5,"Scenario A"  
16 225,1,1,3,3,3,1,2,1,2,2,3,2,2,5,"Scenario A"  
17 225,1,2,3,2,1,1,4,2,1,2,3,4,5,3,"Scenario A"  
18 225,2,2,1,2,3,4,2,1,1,3,1,1,4,5,"Scenario B"  
19 225,1,2,1,1,3,2,1,2,1,1,2,4,3,1,"Scenario B"  
20 225,1,2,2,2,2,3,2,2,2,3,1,4,5,1,"Scenario A"  
21 225,2,1,2,1,2,1,4,1,1,1,3,2,5,2,"Scenario A"  
22 225,2,1,1,3,1,2,1,1,2,3,2,4,3,4,"Scenario A"  
23 225,1,1,3,3,1,5,2,2,2,2,1,3,1,3,"Scenario A"  
24 225,1,1,2,2,3,3,3,2,2,3,1,2,4,5,"Scenario A"  
25 225,1,2,2,3,1,5,4,2,1,3,2,4,2,5,"Scenario A"  
26 228,2,1,2,2,3,2,1,1,2,3,2,1,5,4,"Scenario A"  
27 228,1,2,2,3,2,1,5,2,1,1,1,4,3,3,"Scenario B"  
28 228,2,2,1,1,2,4,5,1,2,2,2,3,1,1,"Scenario B"  
29 228,1,1,3,3,1,4,1,2,2,1,2,4,3,2,"Scenario A"  
30 228,2,1,2,1,4,2,3,1,1,3,3,1,5,3,"Scenario B"  
31 228,2,2,3,1,1,1,1,1,1,1,1,3,3,3,4,"Scenario A"  
32 228,1,2,1,2,3,2,4,2,1,2,2,2,5,3,"Scenario B"  
33 228,2,2,3,3,4,3,5,2,1,2,1,3,5,2,"Scenario B"  
34 228,1,2,1,1,2,4,5,2,1,3,3,4,2,4,"Scenario B"  
35 228,1,1,2,2,2,1,1,2,2,3,1,1,1,2,"Scenario A"  
36 218,1,2,2,2,4,3,2,1,1,1,3,3,4,3,"Scenario A"  
37 218,2,1,3,1,2,5,4,1,2,1,3,4,2,1,"Scenario B"  
38 218,1,1,1,3,1,4,5,2,2,2,2,2,3,5,"Scenario B"  
39 218,2,1,2,2,1,4,1,1,2,2,1,3,1,2,"Scenario B"  
40 218,1,1,3,2,2,2,3,2,2,3,3,1,2,4,"Scenario B"  
41 218,2,1,1,1,4,1,2,1,2,3,2,2,5,3,"Scenario B"  
42 218,2,1,1,2,1,4,4,1,2,3,1,3,3,5,"Scenario A"  
43 218,2,2,2,3,3,5,4,1,2,2,3,4,4,1,"Scenario A"  
44 218,1,1,2,1,4,3,5,2,1,1,2,3,5,1,"Scenario B"  
45 218,1,1,3,1,1,1,2,2,2,3,3,2,4,1,"Scenario B"  
46 232,2,1,2,3,1,3,1,1,2,1,1,1,2,2,"Scenario A"  
47 232,1,1,2,1,2,2,3,2,2,3,2,4,1,2,"Scenario B"  
48 232,2,1,3,2,3,5,5,1,2,1,3,4,4,4,"Scenario A"  
49 232,1,2,3,3,1,4,3,2,1,1,1,2,1,4,"Scenario A"  
50 232,1,1,2,1,4,5,5,2,2,1,2,3,4,1,"Scenario B"  
51 232,2,1,2,3,1,1,3,1,2,2,1,2,3,1,"Scenario A"  
52 232,1,2,1,2,1,3,4,2,1,3,3,3,5,1,"Scenario B"  
53 232,2,2,3,2,1,1,5,1,1,2,3,4,2,2,"Scenario A"  
54 232,2,2,3,1,2,4,2,1,1,1,2,2,2,5,"Scenario B"  
55 232,2,2,1,1,3,3,4,1,1,2,3,1,3,5,"Scenario B"  
56 229,1,1,3,3,3,1,2,1,2,2,3,2,2,5,"Scenario A"  
57 229,1,2,3,2,1,1,4,2,1,2,3,4,5,3,"Scenario B"  
58 229,2,2,1,2,3,4,2,1,1,3,1,1,4,5,"Scenario A"  
59 229,1,2,1,1,3,2,1,2,1,1,2,4,3,1,"Scenario A"  
60

1  
2  
3 229,1,2,2,2,2,3,2,2,2,3,1,4,5,1,"Scenario B"  
4 229,2,1,2,1,2,1,4,1,1,1,3,2,5,2,"Scenario B"  
5 229,2,1,1,3,1,2,1,1,2,3,2,4,3,4,"Scenario A"  
6 229,1,1,3,3,1,5,2,2,2,2,1,3,1,3,"Scenario A"  
7 229,1,1,2,2,3,3,3,2,2,3,1,2,4,5,"Scenario A"  
8 229,1,2,2,3,1,5,4,2,1,3,2,4,2,5,"Scenario A"  
9 223,2,1,2,2,3,2,1,1,2,3,2,1,5,4,"Scenario A"  
10 223,1,2,2,3,2,1,5,2,1,1,1,4,3,3,"Scenario B"  
11 223,2,2,1,1,2,4,5,1,2,2,2,3,1,1,"Scenario A"  
12 223,1,1,3,3,1,4,1,2,2,1,2,4,3,2,"Scenario B"  
13 223,2,1,2,1,4,2,3,1,1,3,3,1,5,3,"Scenario A"  
14 223,2,2,3,1,1,1,1,1,1,1,3,3,3,4,"Scenario A"  
15 223,1,2,1,2,3,2,4,2,1,2,2,2,5,3,"Scenario B"  
16 223,2,2,3,3,4,3,5,2,1,2,1,3,5,2,"Scenario A"  
17 223,1,2,1,1,2,4,5,2,1,3,3,4,2,4,"Scenario B"  
18 223,1,1,2,2,2,1,1,2,2,3,1,1,1,2,"Scenario A"  
19 231,1,2,2,2,4,3,2,1,1,1,3,3,4,3,"Scenario A"  
20 231,2,1,3,1,2,5,4,1,2,1,3,4,2,1,"Scenario B"  
21 231,1,1,1,3,1,4,5,2,2,2,2,2,3,5,"Scenario A"  
22 231,2,1,2,2,1,4,1,1,2,2,1,3,1,2,"Scenario A"  
23 231,1,1,3,2,2,2,3,2,2,3,3,1,2,4,"Scenario A"  
24 231,2,1,1,1,4,1,2,1,2,3,2,2,5,3,"Scenario B"  
25 231,2,1,1,2,1,4,4,1,2,3,1,3,3,5,"Scenario B"  
26 231,2,2,2,3,3,5,4,1,2,2,3,4,4,1,"Scenario B"  
27 231,1,1,2,1,4,3,5,2,1,1,2,3,5,1,"Scenario B"  
28 231,1,1,3,1,1,1,2,2,2,3,3,2,4,1,"Scenario B"  
29 220,2,1,2,3,1,3,1,1,2,1,1,1,2,2,"Scenario A"  
30 220,1,1,2,1,2,2,3,2,2,3,2,4,1,2,"Scenario A"  
31 220,2,1,3,2,3,5,5,1,2,1,3,4,4,4,"Scenario B"  
32 220,1,2,3,3,1,4,3,2,1,1,1,2,1,4,"Scenario A"  
33 220,1,1,2,1,4,5,5,2,2,1,2,3,4,1,"Scenario B"  
34 220,2,1,2,3,1,1,3,1,2,2,1,2,3,1,"Scenario A"  
35 220,1,2,1,2,1,3,4,2,1,3,3,3,5,1,"Scenario B"  
36 220,2,2,3,2,1,1,5,1,1,2,3,4,2,2,"Scenario A"  
37 220,2,2,3,1,2,4,2,1,1,1,2,2,2,5,"Scenario A"  
38 220,2,2,1,1,3,3,4,1,1,2,3,1,3,5,"Scenario A"  
39 230,1,1,3,3,3,1,2,1,2,2,3,2,2,5,"Scenario B"  
40 230,1,2,3,2,1,1,4,2,1,2,3,4,5,3,"Scenario B"  
41 230,2,2,1,2,3,4,2,1,1,3,1,1,4,5,"Scenario A"  
42 230,1,2,1,1,3,2,1,2,1,1,2,4,3,1,"Scenario B"  
43 230,1,2,2,2,2,3,2,2,2,3,1,4,5,1,"Scenario A"  
44 230,2,1,2,1,2,1,4,1,1,1,3,2,5,2,"Scenario B"  
45 230,2,1,1,3,1,2,1,1,2,3,2,4,3,4,"Scenario B"  
46 230,1,1,3,3,1,5,2,2,2,2,1,3,1,3,"Scenario A"  
47 230,1,1,2,2,3,3,3,2,2,3,1,2,4,5,"Scenario B"  
48 230,1,2,2,3,1,5,4,2,1,3,2,4,2,5,"Scenario A"  
49 221,2,1,2,2,3,2,1,1,2,3,2,1,5,4,"Scenario A"  
50 221,1,2,2,3,2,1,5,2,1,1,1,4,3,3,"Scenario B"  
51 221,2,2,1,1,2,4,5,1,2,2,2,3,1,1,"Scenario A"  
52 221,1,1,3,3,1,4,1,2,2,1,2,4,3,2,"Scenario B"  
53 221,2,1,2,1,4,2,3,1,1,3,3,1,5,3,"Scenario A"  
54 221,2,2,3,1,1,1,1,1,1,1,3,3,3,4,"Scenario B"  
55 221,1,2,1,2,3,2,4,2,1,2,2,2,5,3,"Scenario B"  
56 221,2,2,3,3,4,3,5,2,1,2,1,3,5,2,"Scenario A"  
57 221,1,2,1,1,2,4,5,2,1,3,3,4,2,4,"Scenario B"  
58 221,1,1,2,2,2,1,1,2,2,3,1,1,1,2,"Scenario B"  
59 182,1,2,2,2,4,3,2,1,1,1,3,3,4,3,"Scenario B"  
60

1  
2  
3 182,2,1,3,1,2,5,4,1,2,1,3,4,2,1,"Scenario B"  
4 182,1,1,1,3,1,4,5,2,2,2,2,2,3,5,"Scenario A"  
5 182,2,1,2,2,1,4,1,1,2,2,1,3,1,2,"Scenario A"  
6 182,1,1,3,2,2,2,3,2,2,3,3,1,2,4,"Scenario A"  
7 182,2,1,1,1,4,1,2,1,2,3,2,2,5,3,"Scenario A"  
8 182,2,1,1,2,1,4,4,1,2,3,1,3,3,5,"Scenario A"  
9 182,2,2,2,3,3,5,4,1,2,2,3,4,4,1,"Scenario A"  
10 182,1,1,2,1,4,3,5,2,1,1,2,3,5,1,"Scenario B"  
11 182,1,1,3,1,1,1,2,2,2,3,3,2,4,1,"Scenario A"  
12 160,2,1,2,3,1,3,1,1,2,1,1,1,2,2,"Scenario A"  
13 160,1,1,2,1,2,2,3,2,2,3,2,4,1,2,"Scenario B"  
14 160,2,1,3,2,3,5,5,1,2,1,3,4,4,4,"Scenario B"  
15 160,1,2,3,3,1,4,3,2,1,1,1,2,1,4,"Scenario A"  
16 160,1,1,2,1,4,5,5,2,2,1,2,3,4,1,"Scenario B"  
17 160,2,1,2,3,1,1,3,1,2,2,1,2,3,1,"Scenario A"  
18 160,1,2,1,2,1,3,4,2,1,3,3,3,5,1,"Scenario A"  
19 160,2,2,3,2,1,1,5,1,1,2,3,4,2,2,"Scenario A"  
20 160,2,2,3,1,2,4,2,1,1,1,2,2,2,5,"Scenario A"  
21 160,2,2,1,1,3,3,4,1,1,2,3,1,3,5,"Scenario B"  
22 186,1,1,3,3,3,1,2,1,2,2,3,2,2,5,"Scenario B"  
23 186,1,2,3,2,1,1,4,2,1,2,3,4,5,3,"Scenario A"  
24 186,2,2,1,2,3,4,2,1,1,3,1,1,4,5,"Scenario A"  
25 186,1,2,1,1,3,2,1,2,1,1,2,4,3,1,"Scenario A"  
26 186,1,2,2,2,2,3,2,2,2,3,1,4,5,1,"Scenario A"  
27 186,2,1,2,1,2,1,4,1,1,1,3,2,5,2,"Scenario A"  
28 186,2,1,1,3,1,2,1,1,2,3,2,4,3,4,"Scenario B"  
29 186,1,1,3,3,1,5,2,2,2,2,1,3,1,3,"Scenario B"  
30 186,1,1,2,2,3,3,3,2,2,3,1,2,4,5,"Scenario A"  
31 186,1,2,2,3,1,5,4,2,1,3,2,4,2,5,"Scenario A"  
32 27,2,1,2,2,3,2,1,1,2,3,2,1,5,4,"Scenario B"  
33 27,1,2,2,3,2,1,5,2,1,1,1,4,3,3,"Scenario A"  
34 27,2,2,1,1,2,4,5,1,2,2,2,3,1,1,"Scenario B"  
35 27,1,1,3,3,1,4,1,2,2,1,2,4,3,2,"Scenario B"  
36 27,2,1,2,1,4,2,3,1,1,3,3,1,5,3,"Scenario B"  
37 27,2,2,3,1,1,1,1,1,1,1,3,3,3,4,"Scenario A"  
38 27,1,2,1,2,3,2,4,2,1,2,2,2,5,3,"Scenario A"  
39 27,2,2,3,3,4,3,5,2,1,2,1,3,5,2,"Scenario A"  
40 27,1,2,1,1,2,4,5,2,1,3,3,4,2,4,"Scenario B"  
41 27,1,1,2,2,2,1,1,2,2,3,1,1,1,2,"Scenario B"  
42 26,1,2,2,2,4,3,2,1,1,1,3,3,4,3,"Scenario A"  
43 26,2,1,3,1,2,5,4,1,2,1,3,4,2,1,"Scenario A"  
44 26,1,1,1,3,1,4,5,2,2,2,2,2,3,5,"Scenario A"  
45 26,2,1,2,2,1,4,1,1,2,2,1,3,1,2,"Scenario A"  
46 26,1,1,3,2,2,2,3,2,2,3,3,1,2,4,"Scenario A"  
47 26,2,1,1,1,4,1,2,1,2,3,2,2,5,3,"Scenario A"  
48 26,2,1,1,2,1,4,4,1,2,3,1,3,3,5,"Scenario A"  
49 26,2,2,2,3,3,5,4,1,2,2,3,4,4,1,"Scenario A"  
50 26,1,1,2,1,4,3,5,2,1,1,2,3,5,1,"Scenario A"  
51 26,1,1,3,1,1,1,2,2,2,3,3,2,4,1,"Scenario A"  
52 386,2,1,2,3,1,3,1,1,2,1,1,1,2,2,"Scenario A"  
53 386,1,1,2,1,2,2,3,2,2,3,2,4,1,2,"Scenario B"  
54 386,2,1,3,2,3,5,5,1,2,1,3,4,4,4,"Scenario A"  
55 386,1,2,3,3,1,4,3,2,1,1,1,2,1,4,"Scenario B"  
56 386,1,1,2,1,4,5,5,2,2,1,2,3,4,1,"Scenario A"  
57 386,2,1,2,3,1,1,3,1,2,2,1,2,3,1,"Scenario A"  
58 386,1,2,1,2,1,3,4,2,1,3,3,3,5,1,"Scenario A"  
59 386,2,2,3,2,1,1,5,1,1,2,3,4,2,2,"Scenario B"  
60



1  
2  
3 386,2,2,3,1,2,4,2,1,1,1,2,2,2,5,"Scenario A"  
4 386,2,2,1,1,3,3,4,1,1,2,3,1,3,5,"Scenario A"  
5 169,1,1,3,3,3,1,2,1,2,2,3,2,2,5,"Scenario B"  
6 169,1,2,3,2,1,1,4,2,1,2,3,4,5,3,"Scenario A"  
7 169,2,2,1,2,3,4,2,1,1,3,1,1,4,5,"Scenario B"  
8 169,1,2,1,1,3,2,1,2,1,1,2,4,3,1,"Scenario B"  
9 169,1,2,2,2,2,3,2,2,2,3,1,4,5,1,"Scenario B"  
10 169,2,1,2,1,2,1,4,1,1,1,3,2,5,2,"Scenario B"  
11 169,2,1,1,3,1,2,1,1,2,3,2,4,3,4,"Scenario A"  
12 169,1,1,3,3,1,5,2,2,2,2,1,3,1,3,"Scenario B"  
13 169,1,1,2,2,3,3,3,2,2,3,1,2,4,5,"Scenario A"  
14 169,1,2,2,3,1,5,4,2,1,3,2,4,2,5,"Scenario A"  
15 167,2,1,2,2,3,2,1,1,2,3,2,1,5,4,"Scenario B"  
16 167,1,2,2,3,2,1,5,2,1,1,1,4,3,3,"Scenario A"  
17 167,2,2,1,1,2,4,5,1,2,2,2,3,1,1,"Scenario A"  
18 167,1,1,3,3,1,4,1,2,2,1,2,4,3,2,"Scenario A"  
19 167,2,1,2,1,4,2,3,1,1,3,3,1,5,3,"Scenario B"  
20 167,2,2,3,1,1,1,1,1,1,1,3,3,3,4,"Scenario A"  
21 167,1,2,1,2,3,2,4,2,1,2,2,2,5,3,"Scenario B"  
22 167,2,2,3,3,4,3,5,2,1,2,1,3,5,2,"Scenario B"  
23 167,1,2,1,1,2,4,5,2,1,3,3,4,2,4,"Scenario A"  
24 167,1,1,2,2,2,1,1,2,2,3,1,1,1,2,"Scenario B"  
25 154,1,2,2,2,4,3,2,1,1,1,3,3,4,3,"Scenario A"  
26 154,2,1,3,1,2,5,4,1,2,1,3,4,2,1,"Scenario A"  
27 154,1,1,1,3,1,4,5,2,2,2,2,2,3,5,"Scenario A"  
28 154,2,1,2,2,1,4,1,1,2,2,1,3,1,2,"Scenario A"  
29 154,1,1,3,2,2,2,3,2,2,3,3,1,2,4,"Scenario B"  
30 154,2,1,1,1,4,1,2,1,2,3,2,2,5,3,"Scenario A"  
31 154,2,1,1,2,1,4,4,1,2,3,1,3,3,5,"Scenario A"  
32 154,2,2,2,3,3,5,4,1,2,2,3,4,4,1,"Scenario B"  
33 154,1,1,2,1,4,3,5,2,1,1,2,3,5,1,"Scenario A"  
34 154,1,1,3,1,1,1,2,2,2,3,3,2,4,1,"Scenario A"  
35 168,2,1,2,3,1,3,1,1,2,1,1,1,2,2,"Scenario A"  
36 168,1,1,2,1,2,2,3,2,2,3,2,4,1,2,"Scenario A"  
37 168,2,1,3,2,3,5,5,1,2,1,3,4,4,4,"Scenario B"  
38 168,1,2,3,3,1,4,3,2,1,1,1,2,1,4,"Scenario B"  
39 168,1,1,2,1,4,5,5,2,2,1,2,3,4,1,"Scenario A"  
40 168,2,1,2,3,1,1,3,1,2,2,1,2,3,1,"Scenario A"  
41 168,1,2,1,2,1,3,4,2,1,3,3,3,5,1,"Scenario A"  
42 168,2,2,3,2,1,1,5,1,1,2,3,4,2,2,"Scenario B"  
43 168,2,2,3,1,2,4,2,1,1,1,2,2,2,5,"Scenario B"  
44 168,2,2,1,1,3,3,4,1,1,2,3,1,3,5,"Scenario B"  
45 193,1,1,3,3,3,1,2,1,2,2,3,2,2,5,"Scenario A"  
46 193,1,2,3,2,1,1,4,2,1,2,3,4,5,3,"Scenario B"  
47 193,2,2,1,2,3,4,2,1,1,3,1,1,4,5,"Scenario B"  
48 193,1,2,1,1,3,2,1,2,1,1,2,4,3,1,"Scenario B"  
49 193,1,2,2,2,2,3,2,2,2,3,1,4,5,1,"Scenario A"  
50 193,2,1,2,1,2,1,4,1,1,1,1,3,2,5,2,"Scenario A"  
51 193,2,1,1,3,1,2,1,1,2,3,2,4,3,4,"Scenario B"  
52 193,1,1,3,3,1,5,2,2,2,2,1,3,1,3,"Scenario B"  
53 193,1,1,2,2,3,3,3,2,2,3,1,2,4,5,"Scenario B"  
54 193,1,2,2,3,1,5,4,2,1,3,2,4,2,5,"Scenario A"  
55 187,2,1,2,2,3,2,1,1,2,3,2,1,5,4,"Scenario A"  
56 187,1,2,2,3,2,1,5,2,1,1,1,4,3,3,"Scenario B"  
57 187,2,2,1,1,2,4,5,1,2,2,2,3,1,1,"Scenario B"  
58 187,1,1,3,3,1,4,1,2,2,1,2,4,3,2,"Scenario B"  
59 187,2,1,2,1,4,2,3,1,1,3,3,1,5,3,"Scenario B"  
60

1  
2  
3 187,2,2,3,1,1,1,1,1,1,1,3,3,3,4,"Scenario B"  
4 187,1,2,1,2,3,2,4,2,1,2,2,2,5,3,"Scenario A"  
5 187,2,2,3,3,4,3,5,2,1,2,1,3,5,2,"Scenario A"  
6 187,1,2,1,1,2,4,5,2,1,3,3,4,2,4,"Scenario A"  
7 187,1,1,2,2,2,1,1,2,2,3,1,1,1,2,"Scenario A"  
8 188,1,2,2,2,4,3,2,1,1,1,3,3,4,3,"Scenario A"  
9 188,2,1,3,1,2,5,4,1,2,1,3,4,2,1,"Scenario A"  
10 188,1,1,1,3,1,4,5,2,2,2,2,2,3,5,"Scenario A"  
11 188,2,1,2,2,1,4,1,1,2,2,1,3,1,2,"Scenario B"  
12 188,1,1,3,2,2,2,3,2,2,3,3,1,2,4,"Scenario B"  
13 188,2,1,1,1,4,1,2,1,2,3,2,2,5,3,"Scenario A"  
14 188,2,1,1,2,1,4,4,1,2,3,1,3,3,5,"Scenario B"  
15 188,2,2,2,3,3,5,4,1,2,2,3,4,4,1,"Scenario A"  
16 188,1,1,2,1,4,3,5,2,1,1,2,3,5,1,"Scenario A"  
17 188,1,1,3,1,1,1,2,2,2,3,3,2,4,1,"Scenario A"  
18 315,2,1,2,3,1,3,1,1,2,1,1,1,2,2,"Scenario A"  
19 315,1,1,2,1,2,2,3,2,2,3,2,4,1,2,"Scenario B"  
20 315,2,1,3,2,3,5,5,1,2,1,3,4,4,4,"Scenario A"  
21 315,1,2,3,3,1,4,3,2,1,1,1,2,1,4,"Scenario A"  
22 315,1,1,2,1,4,5,5,2,2,1,2,3,4,1,"Scenario B"  
23 315,2,1,2,3,1,1,3,1,2,2,1,2,3,1,"Scenario A"  
24 315,1,2,1,2,1,3,4,2,1,3,3,3,5,1,"Scenario B"  
25 315,2,2,3,2,1,1,5,1,1,2,3,4,2,2,"Scenario A"  
26 315,2,2,3,1,2,4,2,1,1,1,2,2,2,5,"Scenario A"  
27 315,2,2,1,1,3,3,4,1,1,2,3,1,3,5,"Scenario A"  
28 314,1,1,3,3,3,1,2,1,2,2,3,2,2,5,"Scenario A"  
29 314,1,2,3,2,1,1,4,2,1,2,3,4,5,3,"Scenario A"  
30 314,2,2,1,2,3,4,2,1,1,3,1,1,4,5,"Scenario B"  
31 314,1,2,1,1,3,2,1,2,1,1,2,4,3,1,"Scenario B"  
32 314,1,2,2,2,2,3,2,2,2,3,1,4,5,1,"Scenario A"  
33 314,2,1,2,1,2,1,4,1,1,1,3,2,5,2,"Scenario A"  
34 314,2,1,1,3,1,2,1,1,2,3,2,4,3,4,"Scenario A"  
35 314,1,1,3,3,1,5,2,2,2,2,1,3,1,3,"Scenario A"  
36 314,1,1,2,2,3,3,3,2,2,3,1,2,4,5,"Scenario A"  
37 314,1,2,2,3,1,5,4,2,1,3,2,4,2,5,"Scenario B"  
38 472,2,1,2,2,3,2,1,1,2,3,2,1,5,4,"Scenario A"  
39 472,1,2,2,3,2,1,5,2,1,1,1,4,3,3,"Scenario A"  
40 472,2,2,1,1,2,4,5,1,2,2,2,3,1,1,"Scenario A"  
41 472,1,1,3,3,1,4,1,2,2,1,2,4,3,2,"Scenario A"  
42 472,2,1,2,1,4,2,3,1,1,3,3,1,5,3,"Scenario B"  
43 472,2,2,3,1,1,1,1,1,1,1,3,3,3,4,"Scenario A"  
44 472,1,2,1,2,3,2,4,2,1,2,2,2,5,3,"Scenario A"  
45 472,2,2,3,3,4,3,5,2,1,2,1,3,5,2,"Scenario B"  
46 472,1,2,1,1,2,4,5,2,1,3,3,4,2,4,"Scenario B"  
47 472,1,1,2,2,2,1,1,2,2,3,1,1,1,2,"Scenario B"  
48 364,1,2,2,2,4,3,2,1,1,1,3,3,4,3,"Scenario A"  
49 364,2,1,3,1,2,5,4,1,2,1,3,4,2,1,"Scenario B"  
50 364,1,1,1,3,1,4,5,2,2,2,2,2,3,5,"Scenario B"  
51 364,2,1,2,2,1,4,1,1,2,2,1,3,1,2,"Scenario B"  
52 364,1,1,3,2,2,2,3,2,2,3,3,1,2,4,"Scenario B"  
53 364,2,1,1,1,4,1,2,1,2,3,2,2,5,3,"Scenario B"  
54 364,2,1,1,2,1,4,4,1,2,3,1,3,3,5,"Scenario B"  
55 364,2,2,2,3,3,5,4,1,2,2,3,4,4,1,"Scenario A"  
56 364,1,1,2,1,4,3,5,2,1,1,2,3,5,1,"Scenario B"  
57 364,1,1,3,1,1,1,2,2,2,3,3,2,4,1,"Scenario B"  
58 340,1,1,2,1,2,2,3,2,2,3,2,4,1,2,"Scenario A"  
59 340,2,1,3,2,3,5,5,1,2,1,3,4,4,4,"Scenario B"  
60

1  
2  
3 340,1,2,3,3,1,4,3,2,1,1,1,2,1,4,"Scenario A"  
4 340,1,1,2,1,4,5,5,2,2,1,2,3,4,1,"Scenario B"  
5 340,2,1,2,3,1,1,3,1,2,2,1,2,3,1,"Scenario B"  
6 340,1,2,1,2,1,3,4,2,1,3,3,3,5,1,"Scenario B"  
7 340,2,2,3,2,1,1,5,1,1,2,3,4,2,2,"Scenario A"  
8 340,2,2,3,1,2,4,2,1,1,1,2,2,2,5,"Scenario A"  
9 340,2,2,1,1,3,3,4,1,1,2,3,1,3,5,"Scenario A"  
10 343,1,1,3,3,3,1,2,1,2,2,3,2,2,5,"Scenario A"  
11 343,1,2,3,2,1,1,4,2,1,2,3,4,5,3,"Scenario A"  
12 343,2,2,1,2,3,4,2,1,1,3,1,1,4,5,"Scenario A"  
13 343,1,2,1,1,3,2,1,2,1,1,2,4,3,1,"Scenario B"  
14 343,1,2,2,2,2,3,2,2,2,3,1,4,5,1,"Scenario B"  
15 343,2,1,2,1,2,2,1,4,1,1,1,3,2,5,2,"Scenario B"  
16 343,2,1,1,3,1,2,1,1,2,3,2,4,3,4,"Scenario B"  
17 343,1,1,3,3,1,5,2,2,2,2,1,3,1,3,"Scenario B"  
18 343,1,1,2,2,3,3,3,2,2,3,1,2,4,5,"Scenario B"  
19 343,1,2,2,3,1,5,4,2,1,3,2,4,2,5,"Scenario B"  
20 338,2,1,2,2,3,2,1,1,2,3,2,1,5,4,"Scenario A"  
21 338,1,2,2,3,2,1,5,2,1,1,1,4,3,3,"Scenario A"  
22 338,2,2,1,1,2,4,5,1,2,2,2,3,1,1,"Scenario B"  
23 338,1,1,3,3,1,4,1,2,2,1,2,4,3,2,"Scenario A"  
24 338,2,1,2,1,4,2,3,1,1,3,3,1,5,3,"Scenario B"  
25 338,2,2,3,1,1,1,1,1,1,1,3,3,3,4,"Scenario A"  
26 338,1,2,1,2,3,2,4,2,1,2,2,2,5,3,"Scenario B"  
27 338,2,2,3,3,4,3,5,2,1,2,1,3,5,2,"Scenario B"  
28 338,1,2,1,1,2,4,5,2,1,3,3,4,2,4,"Scenario B"  
29 338,1,1,2,2,2,1,1,2,2,3,1,1,1,2,"Scenario A"  
30 371,1,2,2,2,4,3,2,1,1,1,3,3,4,3,"Scenario A"  
31 371,2,1,3,1,2,5,4,1,2,1,3,4,2,1,"Scenario A"  
32 371,1,1,1,3,1,4,5,2,2,2,2,2,3,5,"Scenario B"  
33 371,2,1,2,2,1,4,1,1,2,2,1,3,1,2,"Scenario A"  
34 371,1,1,3,2,2,2,3,2,2,3,3,1,2,4,"Scenario A"  
35 371,2,1,1,1,4,1,2,1,2,3,2,2,5,3,"Scenario A"  
36 371,2,1,1,2,1,4,4,1,2,3,1,3,3,5,"Scenario B"  
37 371,2,2,2,3,3,5,4,1,2,2,3,4,4,1,"Scenario A"  
38 371,1,1,2,1,4,3,5,2,1,1,2,3,5,1,"Scenario B"  
39 371,1,1,3,1,1,1,2,2,2,3,3,2,4,1,"Scenario B"  
40 375,2,1,2,3,1,3,1,1,2,1,1,1,2,2,"Scenario A"  
41 375,1,1,2,1,2,2,3,2,2,3,2,4,1,2,"Scenario A"  
42 375,2,1,3,2,3,5,5,1,2,1,3,4,4,4,"Scenario A"  
43 375,1,2,3,3,1,4,3,2,1,1,1,2,1,4,"Scenario B"  
44 375,1,1,2,1,4,5,5,2,2,1,2,3,4,1,"Scenario A"  
45 375,2,1,2,3,1,1,3,1,2,2,1,2,3,1,"Scenario A"  
46 375,1,2,1,2,1,3,4,2,1,3,3,3,5,1,"Scenario A"  
47 375,2,2,3,2,1,1,5,1,1,2,3,4,2,2,"Scenario A"  
48 375,2,2,3,1,2,4,2,1,1,1,2,2,2,5,"Scenario A"  
49 375,2,2,1,1,3,3,4,1,1,2,3,1,3,5,"Scenario A"  
50 365,1,1,3,3,3,1,2,1,2,2,3,2,2,5,"Scenario A"  
51 365,1,2,3,2,1,1,4,2,1,2,3,4,5,3,"Scenario A"  
52 365,2,2,1,2,3,4,2,1,1,3,1,1,4,5,"Scenario A"  
53 365,1,2,1,1,3,2,1,2,1,1,2,4,3,1,"Scenario B"  
54 365,1,2,2,2,2,3,2,2,2,3,1,4,5,1,"Scenario B"  
55 365,2,1,2,1,2,1,4,1,1,1,3,2,5,2,"Scenario A"  
56 365,2,1,1,3,1,2,1,1,2,3,2,4,3,4,"Scenario B"  
57 365,1,1,3,3,1,5,2,2,2,2,1,3,1,3,"Scenario B"  
58 365,1,1,2,2,3,3,3,2,2,3,1,2,4,5,"Scenario B"  
59 365,1,2,2,3,1,5,4,2,1,3,2,4,2,5,"Scenario A"  
60

1  
2  
3 373,2,1,2,2,3,2,1,1,2,3,2,1,5,4,"Scenario A"  
4 373,1,2,2,3,2,1,5,2,1,1,1,4,3,3,"Scenario B"  
5 373,2,2,1,1,2,4,5,1,2,2,2,3,1,1,"Scenario B"  
6 373,1,1,3,3,1,4,1,2,2,1,2,4,3,2,"Scenario B"  
7 373,2,1,2,1,4,2,3,1,1,3,3,1,5,3,"Scenario B"  
8 373,2,2,3,1,1,1,1,1,1,1,3,3,3,4,"Scenario B"  
9 373,1,2,1,2,3,2,4,2,1,2,2,2,5,3,"Scenario A"  
10 373,2,2,3,3,4,3,5,2,1,2,1,3,5,2,"Scenario B"  
11 373,1,2,1,1,2,4,5,2,1,3,3,4,2,4,"Scenario B"  
12 373,1,1,2,2,2,1,1,2,2,3,1,1,1,2,"Scenario B"  
13 366,1,2,2,2,4,3,2,1,1,1,3,3,4,3,"Scenario A"  
14 366,2,1,3,1,2,5,4,1,2,1,3,4,2,1,"Scenario A"  
15 366,1,1,1,3,1,4,5,2,2,2,2,2,3,5,"Scenario B"  
16 366,2,1,2,2,1,4,1,1,2,2,1,3,1,2,"Scenario A"  
17 366,1,1,3,2,2,2,3,2,2,3,3,1,2,4,"Scenario B"  
18 366,2,1,1,1,4,1,2,1,2,3,2,2,5,3,"Scenario B"  
19 366,2,1,1,2,1,4,4,1,2,3,1,3,3,5,"Scenario B"  
20 366,2,2,2,3,3,5,4,1,2,2,3,4,4,1,"Scenario A"  
21 366,1,1,2,1,4,3,5,2,1,1,2,3,5,1,"Scenario A"  
22 366,1,1,3,1,1,1,2,2,2,3,3,2,4,1,"Scenario B"  
23 43,2,1,2,3,1,3,1,1,2,1,1,1,2,2,"Scenario A"  
24 43,1,1,2,1,2,2,3,2,2,3,2,4,1,2,"Scenario A"  
25 43,2,1,3,2,3,5,5,1,2,1,3,4,4,4,"Scenario B"  
26 43,1,2,3,3,1,4,3,2,1,1,1,2,1,4,"Scenario A"  
27 43,1,1,2,1,4,5,5,2,2,1,2,3,4,1,"Scenario B"  
28 43,2,1,2,3,1,1,3,1,2,2,1,2,3,1,"Scenario B"  
29 43,1,2,1,2,1,3,4,2,1,3,3,3,5,1,"Scenario B"  
30 43,2,2,3,2,1,1,5,1,1,2,3,4,2,2,"Scenario A"  
31 43,2,2,3,1,2,4,2,1,1,1,2,2,2,5,"Scenario B"  
32 43,2,2,1,1,3,3,4,1,1,2,3,1,3,5,"Scenario A"  
33 50,1,1,3,3,3,1,2,1,2,2,3,2,2,5,"Scenario A"  
34 50,1,2,3,2,1,1,4,2,1,2,3,4,5,3,"Scenario B"  
35 50,2,2,1,2,3,4,2,1,1,3,1,1,4,5,"Scenario A"  
36 50,1,2,1,1,3,2,1,2,1,1,2,4,3,1,"Scenario B"  
37 50,1,2,2,2,2,3,2,2,2,3,1,4,5,1,"Scenario B"  
38 50,2,1,2,1,2,1,4,1,1,1,3,2,5,2,"Scenario B"  
39 50,2,1,1,3,1,2,1,1,2,3,2,4,3,4,"Scenario A"  
40 50,1,1,3,3,1,5,2,2,2,2,1,3,1,3,"Scenario A"  
41 50,1,1,2,2,3,3,3,2,2,3,1,2,4,5,"Scenario A"  
42 50,1,2,2,3,1,5,4,2,1,3,2,4,2,5,"Scenario A"  
43 308,2,1,2,2,3,2,1,1,2,3,2,1,5,4,"Scenario B"  
44 308,1,2,2,3,2,1,5,2,1,1,1,4,3,3,"Scenario A"  
45 308,2,2,1,1,2,4,5,1,2,2,2,3,1,1,"Scenario B"  
46 308,1,1,3,3,1,4,1,2,2,1,2,4,3,2,"Scenario A"  
47 308,2,1,2,1,4,2,3,1,1,3,3,1,5,3,"Scenario B"  
48 308,2,2,3,1,1,1,1,1,1,1,3,3,3,4,"Scenario A"  
49 308,1,2,1,2,3,2,4,2,1,2,2,2,5,3,"Scenario B"  
50 308,2,2,3,3,4,3,5,2,1,2,1,3,5,2,"Scenario B"  
51 308,1,2,1,1,2,4,5,2,1,3,3,4,2,4,"Scenario B"  
52 308,1,1,2,2,2,1,1,2,2,3,1,1,1,2,"Scenario A"  
53 51,1,2,2,2,4,3,2,1,1,1,3,3,4,3,"Scenario A"  
54 51,2,1,3,1,2,5,4,1,2,1,3,4,2,1,"Scenario A"  
55 51,1,1,1,3,1,4,5,2,2,2,2,2,3,5,"Scenario B"  
56 51,2,1,2,2,1,4,1,1,2,2,1,3,1,2,"Scenario A"  
57 51,1,1,3,2,2,2,3,2,2,3,3,1,2,4,"Scenario A"  
58 51,2,1,1,1,4,1,2,1,2,3,2,2,5,3,"Scenario A"  
59 51,2,1,1,2,1,4,4,1,2,3,1,3,3,5,"Scenario A"  
60

1  
2  
3 51,2,2,2,3,3,5,4,1,2,2,3,4,4,1,"Scenario B"  
4 51,1,1,2,1,4,3,5,2,1,1,2,3,5,1,"Scenario B"  
5 51,1,1,3,1,1,1,2,2,2,3,3,2,4,1,"Scenario B"  
6 48,2,1,2,3,1,3,1,1,2,1,1,1,2,2,"Scenario A"  
7 48,1,1,2,1,2,2,3,2,2,3,2,4,1,2,"Scenario B"  
8 48,2,1,3,2,3,5,5,1,2,1,3,4,4,4,"Scenario B"  
9 48,1,2,3,3,1,4,3,2,1,1,1,2,1,4,"Scenario A"  
10 48,1,1,2,1,4,5,5,2,2,1,2,3,4,1,"Scenario B"  
11 48,2,1,2,3,1,1,3,1,2,2,1,2,3,1,"Scenario B"  
12 48,1,2,1,2,1,3,4,2,1,3,3,3,5,1,"Scenario B"  
13 48,2,2,3,2,1,1,5,1,1,2,3,4,2,2,"Scenario B"  
14 48,2,2,3,1,2,4,2,1,1,1,2,2,2,5,"Scenario A"  
15 48,2,2,3,1,2,3,3,4,1,1,2,3,1,3,5,"Scenario A"  
16 49,1,1,3,3,3,1,2,1,2,2,3,2,2,5,"Scenario B"  
17 49,1,2,3,2,1,1,4,2,1,2,3,4,5,3,"Scenario B"  
18 49,2,2,1,2,3,4,2,1,1,3,1,1,4,5,"Scenario A"  
19 49,1,2,1,1,3,2,1,2,1,1,2,4,3,1,"Scenario A"  
20 49,1,2,2,2,2,3,2,2,2,3,1,4,5,1,"Scenario B"  
21 49,2,1,2,1,2,1,4,1,1,1,3,2,5,2,"Scenario B"  
22 49,2,1,1,3,1,2,1,1,2,3,2,4,3,4,"Scenario A"  
23 49,1,1,3,3,1,5,2,2,2,2,1,3,1,3,"Scenario A"  
24 49,1,1,2,2,3,3,3,2,2,3,1,2,4,5,"Scenario A"  
25 49,1,2,2,3,1,5,4,2,1,3,2,4,2,5,"Scenario A"  
26 42,2,1,2,2,3,2,1,1,2,3,2,1,5,4,"Scenario A"  
27 42,1,2,2,3,2,1,5,2,1,1,1,4,3,3,"Scenario B"  
28 42,2,2,1,1,2,4,5,1,2,2,2,3,1,1,"Scenario B"  
29 42,1,1,3,3,1,4,1,2,2,1,2,4,3,2,"Scenario A"  
30 42,2,1,2,1,4,2,3,1,1,3,3,1,5,3,"Scenario B"  
31 42,2,2,3,1,1,1,1,1,1,1,3,3,3,4,"Scenario A"  
32 42,1,2,1,2,3,2,4,2,1,2,2,2,5,3,"Scenario B"  
33 42,2,2,3,3,4,3,5,2,1,2,1,3,5,2,"Scenario B"  
34 42,1,2,1,1,2,4,5,2,1,3,3,4,2,4,"Scenario B"  
35 42,1,1,2,2,2,1,1,2,2,3,1,1,1,2,"Scenario A"  
36 46,1,2,2,2,4,3,2,1,1,1,3,3,4,3,"Scenario A"  
37 46,2,1,3,1,2,5,4,1,2,1,3,4,2,1,"Scenario A"  
38 46,1,1,1,3,1,4,5,2,2,2,2,2,3,5,"Scenario B"  
39 46,2,1,2,2,1,4,1,1,2,2,1,3,1,2,"Scenario A"  
40 46,1,1,3,2,2,2,3,2,2,3,3,1,2,4,"Scenario A"  
41 46,2,1,1,1,4,1,2,1,2,3,2,2,5,3,"Scenario A"  
42 46,2,1,1,2,1,4,4,1,2,3,1,3,3,5,"Scenario A"  
43 46,2,2,2,3,3,5,4,1,2,2,3,4,4,1,"Scenario B"  
44 46,1,1,2,1,4,3,5,2,1,1,2,3,5,1,"Scenario B"  
45 46,1,1,3,1,1,1,2,2,2,3,3,2,4,1,"Scenario B"  
46 47,2,1,2,3,1,3,1,1,2,1,1,1,2,2,"Scenario A"  
47 47,1,1,2,1,2,2,3,2,2,3,2,4,1,2,"Scenario B"  
48 47,2,1,3,2,3,5,5,1,2,1,3,4,4,4,"Scenario B"  
49 47,1,2,3,3,1,4,3,2,1,1,1,2,1,4,"Scenario A"  
50 47,1,1,2,1,4,5,5,2,2,1,2,3,4,1,"Scenario B"  
51 47,2,1,2,3,1,1,3,1,2,2,1,2,3,1,"Scenario B"  
52 47,1,2,1,2,1,3,4,2,1,3,3,3,5,1,"Scenario B"  
53 47,2,2,3,2,1,1,5,1,1,2,3,4,2,2,"Scenario B"  
54 47,2,2,3,1,2,4,2,1,1,1,2,2,2,5,"Scenario A"  
55 45,1,1,3,3,3,1,2,1,2,2,3,2,2,5,"Scenario A"  
56 45,1,2,3,2,1,1,4,2,1,2,3,4,5,3,"Scenario B"  
57 45,2,2,1,2,3,4,2,1,1,3,1,1,4,5,"Scenario B"  
58 45,1,2,1,1,3,2,1,2,1,1,2,4,3,1,"Scenario A"  
59  
60

1  
2  
3 45,1,2,2,2,2,3,2,2,2,3,1,4,5,1,"Scenario B"  
4 45,2,1,2,1,2,1,4,1,1,1,3,2,5,2,"Scenario A"  
5 45,2,1,1,3,1,2,1,1,2,3,2,4,3,4,"Scenario B"  
6 45,1,1,3,3,1,5,2,2,2,2,1,3,1,3,"Scenario B"  
7 45,1,1,2,2,3,3,3,2,2,3,1,2,4,5,"Scenario B"  
8 45,1,2,2,3,1,5,4,2,1,3,2,4,2,5,"Scenario A"  
9 52,2,1,2,2,3,2,1,1,2,3,2,1,5,4,"Scenario A"  
10 52,1,2,2,3,2,1,5,2,1,1,1,4,3,3,"Scenario B"  
11 52,2,2,1,1,2,4,5,1,2,2,2,3,1,1,"Scenario B"  
12 52,1,1,3,3,1,4,1,2,2,1,2,4,3,2,"Scenario A"  
13 52,2,1,2,1,4,2,3,1,1,3,3,1,5,3,"Scenario B"  
14 52,2,2,3,1,1,1,1,1,1,1,3,3,3,4,"Scenario A"  
15 52,1,2,1,2,3,2,4,2,1,2,2,2,5,3,"Scenario B"  
16 52,2,2,3,3,4,3,5,2,1,2,1,3,5,2,"Scenario B"  
17 52,1,2,1,1,2,4,5,2,1,3,3,4,2,4,"Scenario B"  
18 52,1,1,2,2,2,1,1,2,2,3,1,1,1,2,"Scenario A"  
19 40,1,2,2,2,4,3,2,1,1,1,3,3,4,3,"Scenario A"  
20 40,2,1,3,1,2,5,4,1,2,1,3,4,2,1,"Scenario B"  
21 40,1,1,1,3,1,4,5,2,2,2,2,2,3,5,"Scenario B"  
22 40,2,1,2,2,1,4,1,1,2,2,1,3,1,2,"Scenario A"  
23 40,1,1,3,2,2,2,3,2,2,3,3,1,2,4,"Scenario A"  
24 40,2,1,1,1,4,1,2,1,2,3,2,2,5,3,"Scenario A"  
25 40,2,1,1,2,1,4,4,1,2,3,1,3,3,5,"Scenario A"  
26 40,2,2,2,3,3,5,4,1,2,2,3,4,4,1,"Scenario B"  
27 40,1,1,2,1,4,3,5,2,1,1,2,3,5,1,"Scenario B"  
28 40,1,1,3,1,1,1,2,2,2,3,3,2,4,1,"Scenario B"  
29 53,2,1,2,3,1,3,1,1,2,1,1,1,2,2,"Scenario A"  
30 53,1,1,2,1,2,2,3,2,2,3,2,4,1,2,"Scenario B"  
31 53,2,1,3,2,3,5,5,1,2,1,3,4,4,4,"Scenario B"  
32 53,1,2,3,3,1,4,3,2,1,1,1,2,1,4,"Scenario A"  
33 53,1,1,2,1,4,5,5,2,2,1,2,3,4,1,"Scenario B"  
34 53,2,1,2,3,1,1,3,1,2,2,1,2,3,1,"Scenario A"  
35 53,1,2,1,2,1,3,4,2,1,3,3,3,5,1,"Scenario B"  
36 53,2,2,3,2,1,1,5,1,1,2,3,4,2,2,"Scenario B"  
37 53,2,2,3,1,2,4,2,1,1,1,2,2,2,5,"Scenario A"  
38 53,2,2,1,1,3,3,4,1,1,2,3,1,3,5,"Scenario B"  
39 44,1,1,3,3,3,1,2,1,2,2,3,2,2,5,"Scenario B"  
40 44,1,2,3,2,1,1,4,2,1,2,3,4,5,3,"Scenario A"  
41 44,2,2,1,2,3,4,2,1,1,3,1,1,4,5,"Scenario B"  
42 44,1,2,1,1,3,2,1,2,1,1,2,4,3,1,"Scenario B"  
43 44,1,2,2,2,2,3,2,2,2,3,1,4,5,1,"Scenario A"  
44 44,2,1,2,1,2,1,4,1,1,1,3,2,5,2,"Scenario B"  
45 44,2,1,1,3,1,2,1,1,2,3,2,4,3,4,"Scenario A"  
46 44,1,1,3,3,1,5,2,2,2,2,1,3,1,3,"Scenario A"  
47 44,1,1,2,2,3,3,3,2,2,3,1,2,4,5,"Scenario B"  
48 44,1,2,2,3,1,5,4,2,1,3,2,4,2,5,"Scenario A"  
49 41,2,1,2,2,3,2,1,1,2,3,2,1,5,4,"Scenario A"  
50 41,1,2,2,3,2,1,5,2,1,1,1,4,3,3,"Scenario B"  
51 41,2,2,1,1,2,4,5,1,2,2,2,3,1,1,"Scenario B"  
52 41,1,1,3,3,1,4,1,2,2,1,2,4,3,2,"Scenario A"  
53 41,2,1,2,1,4,2,3,1,1,3,3,1,5,3,"Scenario B"  
54 41,2,2,3,1,1,1,1,1,1,1,3,3,3,4,"Scenario A"  
55 41,1,2,1,2,3,2,4,2,1,2,2,2,5,3,"Scenario B"  
56 41,2,2,3,3,4,3,5,2,1,2,1,3,5,2,"Scenario B"  
57 41,1,2,1,1,2,4,5,2,1,3,3,4,2,4,"Scenario B"  
58 41,1,1,2,2,2,1,1,2,2,3,1,1,1,2,"Scenario A"  
59 58,1,2,2,2,4,3,2,1,1,1,3,3,4,3,"Scenario A"  
60

1  
2  
3 58,2,1,3,1,2,5,4,1,2,1,3,4,2,1,"Scenario B"  
4 58,1,1,1,3,1,4,5,2,2,2,2,2,3,5,"Scenario B"  
5 58,2,1,2,2,1,4,1,1,2,2,1,3,1,2,"Scenario B"  
6 58,1,1,3,2,2,2,3,2,2,3,3,1,2,4,"Scenario B"  
7 58,2,1,1,1,4,1,2,1,2,3,2,2,5,3,"Scenario B"  
8 58,2,1,1,2,1,4,4,1,2,3,1,3,3,5,"Scenario B"  
9 58,2,2,2,3,3,5,4,1,2,2,3,4,4,1,"Scenario A"  
10 58,1,1,2,1,4,3,5,2,1,1,2,3,5,1,"Scenario A"  
11 58,1,1,3,1,1,1,2,2,2,3,3,2,4,1,"Scenario B"  
12 12,2,1,2,3,1,3,1,1,2,1,1,1,2,2,"Scenario A"  
13 12,1,1,2,1,2,2,3,2,2,3,2,4,1,2,"Scenario A"  
14 12,2,1,3,2,3,5,5,1,2,1,3,4,4,4,"Scenario A"  
15 12,1,2,3,3,1,4,3,2,1,1,1,2,1,4,"Scenario A"  
16 12,1,1,2,1,4,5,5,2,2,1,2,3,4,1,"Scenario B"  
17 12,2,1,2,3,1,1,3,1,2,2,1,2,3,1,"Scenario A"  
18 12,1,2,1,2,1,3,4,2,1,3,3,3,5,1,"Scenario A"  
19 12,2,2,3,2,1,1,5,1,1,2,3,4,2,2,"Scenario A"  
20 12,2,2,3,1,2,4,2,1,1,1,2,2,2,5,"Scenario B"  
21 12,2,2,1,1,3,3,4,1,1,2,3,1,3,5,"Scenario B"  
22 54,1,1,3,3,3,1,2,1,2,2,3,2,2,5,"Scenario B"  
23 54,1,2,3,2,1,1,4,2,1,2,3,4,5,3,"Scenario A"  
24 54,2,2,1,2,3,4,2,1,1,3,1,1,4,5,"Scenario B"  
25 54,1,2,1,1,3,2,1,2,1,1,2,4,3,1,"Scenario A"  
26 54,1,2,2,2,2,3,2,2,2,3,1,4,5,1,"Scenario B"  
27 54,2,1,2,1,2,1,4,1,1,1,3,2,5,2,"Scenario B"  
28 54,2,1,1,3,1,2,1,1,2,3,2,4,3,4,"Scenario A"  
29 54,1,1,3,3,1,5,2,2,2,2,1,3,1,3,"Scenario A"  
30 54,1,1,2,2,3,3,3,2,2,3,1,2,4,5,"Scenario B"  
31 54,1,2,2,3,1,5,4,2,1,3,2,4,2,5,"Scenario A"  
32 56,2,1,2,2,3,2,1,5,2,1,1,2,3,2,1,5,4,"Scenario A"  
33 56,1,2,2,3,2,1,5,2,1,1,1,4,3,3,"Scenario B"  
34 56,2,2,1,1,2,4,5,1,2,2,2,3,1,1,"Scenario B"  
35 56,1,1,3,3,1,4,1,2,2,1,2,4,3,2,"Scenario A"  
36 56,2,1,2,1,4,2,3,1,1,3,3,1,5,3,"Scenario B"  
37 56,2,2,3,1,1,1,1,1,1,1,3,3,3,4,"Scenario A"  
38 56,1,2,1,2,3,2,4,2,1,2,2,2,5,3,"Scenario B"  
39 56,2,2,3,3,4,3,5,2,1,2,1,3,5,2,"Scenario B"  
40 56,1,2,1,1,2,4,5,2,1,3,3,4,2,4,"Scenario B"  
41 56,1,1,2,2,2,1,1,2,2,3,1,1,1,2,"Scenario A"  
42 11,1,2,2,2,4,3,2,1,1,1,3,3,4,3,"Scenario A"  
43 11,2,1,3,1,2,5,4,1,2,1,3,4,2,1,"Scenario B"  
44 11,1,1,1,3,1,4,5,2,2,2,2,2,3,5,"Scenario B"  
45 11,2,1,2,2,1,4,1,1,2,2,1,3,1,2,"Scenario B"  
46 11,1,1,3,2,2,2,3,2,2,3,3,1,2,4,"Scenario B"  
47 11,2,1,1,1,4,1,2,1,2,3,2,2,5,3,"Scenario B"  
48 11,2,1,1,2,1,4,4,1,2,3,1,3,3,5,"Scenario B"  
49 11,2,2,2,3,3,5,4,1,2,2,3,4,4,1,"Scenario A"  
50 11,1,1,2,1,4,3,5,2,1,1,2,3,5,1,"Scenario B"  
51 11,1,1,3,1,1,1,2,2,2,3,3,2,4,1,"Scenario B"  
52 483,2,1,2,3,1,3,1,1,2,1,1,1,2,2,"Scenario B"  
53 483,1,1,2,1,2,2,3,2,2,3,2,4,1,2,"Scenario B"  
54 483,2,1,3,2,3,5,5,1,2,1,3,4,4,4,"Scenario B"  
55 483,1,2,3,3,1,4,3,2,1,1,1,2,1,4,"Scenario A"  
56 483,1,1,2,1,4,5,5,2,2,1,2,3,4,1,"Scenario B"  
57 483,2,1,2,3,1,1,3,1,2,2,1,2,3,1,"Scenario B"  
58 483,1,2,1,2,1,3,4,2,1,3,3,3,5,1,"Scenario A"  
59 483,2,2,3,2,1,1,5,1,1,2,3,4,2,2,"Scenario A"  
60

1  
2  
3 483,2,2,3,1,2,4,2,1,1,1,2,2,2,5,"Scenario A"  
4 483,2,2,1,1,3,3,4,1,1,2,3,1,3,5,"Scenario A"  
5 482,1,1,3,3,3,1,2,1,2,2,3,2,2,5,"Scenario A"  
6 482,1,2,3,2,1,1,4,2,1,2,3,4,5,3,"Scenario A"  
7 482,2,2,1,2,3,4,2,1,1,3,1,1,4,5,"Scenario A"  
8 482,1,2,1,1,3,2,1,2,1,1,2,4,3,1,"Scenario B"  
9 482,1,2,2,2,2,3,2,2,2,3,1,4,5,1,"Scenario B"  
10 482,2,1,2,1,2,1,4,1,1,1,3,2,5,2,"Scenario A"  
11 482,2,1,1,3,1,2,1,1,2,3,2,4,3,4,"Scenario A"  
12 482,1,1,3,3,1,5,2,2,2,2,1,3,1,3,"Scenario B"  
13 482,1,1,2,2,3,3,3,2,2,3,1,2,4,5,"Scenario B"  
14 482,1,2,2,3,1,5,4,2,1,3,2,4,2,5,"Scenario A"  
15 485,2,1,2,2,3,2,1,1,2,3,2,1,5,4,"Scenario B"  
16 485,1,2,2,3,2,1,5,2,1,1,1,4,3,3,"Scenario A"  
17 485,2,2,1,1,2,4,5,1,2,2,2,3,1,1,"Scenario B"  
18 485,1,1,3,3,1,4,1,2,2,1,2,4,3,2,"Scenario B"  
19 485,2,1,2,1,4,2,3,1,1,3,3,1,5,3,"Scenario B"  
20 485,2,2,3,1,1,1,1,1,1,1,3,3,3,4,"Scenario B"  
21 485,1,2,1,2,3,2,4,2,1,2,2,2,5,3,"Scenario B"  
22 485,2,2,3,3,4,3,5,2,1,2,1,3,5,2,"Scenario A"  
23 485,1,2,1,1,2,4,5,2,1,3,3,4,2,4,"Scenario B"  
24 485,1,1,2,2,2,1,1,2,2,3,1,1,1,2,"Scenario A"  
25 480,1,2,2,2,4,3,2,1,1,1,3,3,4,3,"Scenario A"  
26 480,2,1,3,1,2,5,4,1,2,1,3,4,2,1,"Scenario A"  
27 480,1,1,1,3,1,4,5,2,2,2,2,2,3,5,"Scenario B"  
28 480,2,1,2,2,1,4,1,1,2,2,1,3,1,2,"Scenario A"  
29 480,1,1,3,2,2,2,3,2,2,3,3,1,2,4,"Scenario B"  
30 480,2,1,1,1,4,1,2,1,2,3,2,2,5,3,"Scenario A"  
31 480,2,1,1,2,1,4,4,1,2,3,1,3,3,5,"Scenario B"  
32 480,2,2,2,3,3,5,4,1,2,2,3,4,4,1,"Scenario A"  
33 480,1,1,2,1,4,3,5,2,1,1,2,3,5,1,"Scenario A"  
34 480,1,1,3,1,1,1,2,2,2,3,3,2,4,1,"Scenario A"  
35 479,2,1,2,3,1,3,1,1,2,1,1,1,2,2,"Scenario A"  
36 479,1,1,2,1,2,2,3,2,2,3,2,4,1,2,"Scenario B"  
37 479,2,1,3,2,3,5,5,1,2,1,3,4,4,4,"Scenario A"  
38 479,1,2,3,3,1,4,3,2,1,1,1,2,1,4,"Scenario A"  
39 479,1,1,2,1,4,5,5,2,2,1,2,3,4,1,"Scenario B"  
40 479,2,1,2,3,1,1,3,1,2,2,1,2,3,1,"Scenario B"  
41 479,1,2,1,2,1,3,4,2,1,3,3,3,5,1,"Scenario B"  
42 479,2,2,3,2,1,1,5,1,1,2,3,4,2,2,"Scenario A"  
43 479,2,2,3,1,2,4,2,1,1,1,2,2,2,5,"Scenario A"  
44 479,2,2,1,1,3,3,4,1,1,2,3,1,3,5,"Scenario A"  
45 69,1,1,3,3,3,1,2,1,2,2,3,2,2,5,"Scenario A"  
46 69,1,2,3,2,1,1,4,2,1,2,3,4,5,3,"Scenario A"  
47 69,2,2,1,2,3,4,2,1,1,3,1,1,4,5,"Scenario B"  
48 69,1,2,1,1,3,2,1,2,1,1,2,4,3,1,"Scenario B"  
49 69,1,2,2,2,2,3,2,2,2,3,1,4,5,1,"Scenario A"  
50 69,2,1,2,1,2,1,4,1,1,1,3,2,5,2,"Scenario B"  
51 69,2,1,1,3,1,2,1,1,2,3,2,4,3,4,"Scenario A"  
52 69,1,1,3,3,1,5,2,2,2,2,1,3,1,3,"Scenario A"  
53 69,1,1,2,2,3,3,3,2,2,3,1,2,4,5,"Scenario A"  
54 69,1,2,2,3,1,5,4,2,1,3,2,4,2,5,"Scenario A"  
55 57,2,1,2,2,3,2,1,1,2,3,2,1,5,4,"Scenario B"  
56 57,1,2,2,3,2,1,5,2,1,1,1,4,3,3,"Scenario A"  
57 57,2,2,1,1,2,4,5,1,2,2,2,3,1,1,"Scenario A"  
58 57,1,1,3,3,1,4,1,2,2,1,2,4,3,2,"Scenario A"  
59 57,2,1,2,1,4,2,3,1,1,3,3,1,5,3,"Scenario B"  
60



1  
2  
3 57,2,2,3,1,1,1,1,1,1,1,3,3,3,4,"Scenario A"  
4 57,1,2,1,2,3,2,4,2,1,2,2,2,5,3,"Scenario B"  
5 57,2,2,3,3,4,3,5,2,1,2,1,3,5,2,"Scenario B"  
6 57,1,2,1,1,2,4,5,2,1,3,3,4,2,4,"Scenario A"  
7 57,1,1,2,2,2,1,1,2,2,3,1,1,1,2,"Scenario B"  
8 55,1,2,2,2,4,3,2,1,1,1,3,3,4,3,"Scenario A"  
9 55,2,1,3,1,2,5,4,1,2,1,3,4,2,1,"Scenario A"  
10 55,1,1,1,3,1,4,5,2,2,2,2,2,3,5,"Scenario A"  
11 55,2,1,2,2,1,4,1,1,2,2,1,3,1,2,"Scenario A"  
12 55,1,1,3,2,2,2,3,2,2,3,3,1,2,4,"Scenario B"  
13 55,2,1,1,1,4,1,2,1,2,3,2,2,5,3,"Scenario B"  
14 55,2,1,1,2,1,4,4,1,2,3,1,3,3,5,"Scenario B"  
15 55,2,2,2,3,3,5,4,1,2,2,3,4,4,1,"Scenario A"  
16 55,1,1,2,1,4,3,5,2,1,1,2,3,5,1,"Scenario B"  
17 55,1,1,3,1,1,1,2,2,2,3,3,2,4,1,"Scenario A"  
18 13,2,1,2,3,1,3,1,1,2,1,1,1,2,2,"Scenario A"  
19 13,1,1,2,1,2,2,3,2,2,3,2,4,1,2,"Scenario B"  
20 13,2,1,3,2,3,5,5,1,2,1,3,4,4,4,"Scenario B"  
21 13,1,2,3,3,1,4,3,2,1,1,1,2,1,4,"Scenario A"  
22 13,1,1,2,1,4,5,5,2,2,1,2,3,4,1,"Scenario B"  
23 13,2,1,2,3,1,1,3,1,2,2,1,2,3,1,"Scenario B"  
24 13,1,2,1,2,1,3,4,2,1,3,3,3,5,1,"Scenario B"  
25 13,2,2,3,2,1,1,5,1,1,2,3,4,2,2,"Scenario B"  
26 13,2,2,3,1,2,4,2,1,1,1,2,2,2,5,"Scenario A"  
27 13,2,2,1,1,3,3,4,1,1,2,3,1,3,5,"Scenario A"  
28 59,1,1,3,3,3,1,2,1,2,2,3,2,2,5,"Scenario B"  
29 59,1,2,3,2,1,1,4,2,1,2,3,4,5,3,"Scenario A"  
30 59,2,2,1,2,3,4,2,1,1,3,1,1,4,5,"Scenario A"  
31 59,1,2,1,1,3,2,1,2,1,1,2,4,3,1,"Scenario A"  
32 59,1,2,2,2,2,3,2,2,2,3,1,4,5,1,"Scenario A"  
33 59,2,1,2,1,2,1,4,1,1,1,3,2,5,2,"Scenario A"  
34 59,2,1,1,3,1,2,1,1,2,3,2,4,3,4,"Scenario B"  
35 59,1,1,3,3,1,5,2,2,2,2,1,3,1,3,"Scenario A"  
36 59,1,1,2,2,3,3,3,2,2,3,1,2,4,5,"Scenario B"  
37 59,1,2,2,3,1,5,4,2,1,3,2,4,2,5,"Scenario A"  
38 70,2,1,2,2,3,2,1,1,2,3,2,1,5,4,"Scenario A"  
39 70,1,2,2,3,2,1,5,2,1,1,1,4,3,3,"Scenario B"  
40 70,2,2,1,1,2,4,5,1,2,2,2,3,1,1,"Scenario B"  
41 70,1,1,3,3,1,4,1,2,2,1,2,4,3,2,"Scenario B"  
42 70,2,1,2,1,4,2,3,1,1,3,3,1,5,3,"Scenario A"  
43 70,2,2,3,1,1,1,1,1,1,1,3,3,3,4,"Scenario A"  
44 70,1,2,1,2,3,2,4,2,1,2,2,2,5,3,"Scenario B"  
45 70,2,2,3,3,4,3,5,2,1,2,1,3,5,2,"Scenario A"  
46 70,1,2,1,1,2,4,5,2,1,3,3,4,2,4,"Scenario B"  
47 70,1,1,2,2,2,1,1,2,2,3,1,1,1,2,"Scenario A"  
48 71,1,2,2,2,4,3,2,1,1,1,3,3,4,3,"Scenario B"  
49 71,2,1,3,1,2,5,4,1,2,1,3,4,2,1,"Scenario A"  
50 71,1,1,1,3,1,4,5,2,2,2,2,2,3,5,"Scenario A"  
51 71,2,1,2,2,1,4,1,1,2,2,1,3,1,2,"Scenario A"  
52 71,1,1,3,2,2,2,3,2,2,3,3,1,2,4,"Scenario B"  
53 71,2,1,1,1,4,1,2,1,2,3,2,2,5,3,"Scenario B"  
54 71,2,1,1,2,1,4,4,1,2,3,1,3,3,5,"Scenario A"  
55 71,2,2,2,3,3,5,4,1,2,2,3,4,4,1,"Scenario A"  
56 71,1,1,2,1,4,3,5,2,1,1,2,3,5,1,"Scenario B"  
57 71,1,1,3,1,1,1,2,2,2,3,3,2,4,1,"Scenario A"  
58 73,2,1,2,3,1,3,1,1,2,1,1,1,2,2,"Scenario A"  
59 73,1,1,2,1,2,2,3,2,2,3,2,4,1,2,"Scenario B"  
60

1  
2  
3 73,2,1,3,2,3,5,5,1,2,1,3,4,4,4,"Scenario A"  
4 73,1,2,3,3,1,4,3,2,1,1,1,2,1,4,"Scenario A"  
5 73,1,1,2,1,4,5,5,2,2,1,2,3,4,1,"Scenario B"  
6 73,2,1,2,3,1,1,3,1,2,2,1,2,3,1,"Scenario A"  
7 73,1,2,1,2,1,3,4,2,1,3,3,3,5,1,"Scenario A"  
8 73,2,2,3,2,1,1,5,1,1,2,3,4,2,2,"Scenario B"  
9 73,2,2,3,1,2,4,2,1,1,1,2,2,2,5,"Scenario A"  
10 73,2,2,1,1,3,3,4,1,1,2,3,1,3,5,"Scenario B"  
11 74,1,1,3,3,3,1,2,1,2,2,3,2,2,5,"Scenario A"  
12 74,1,2,3,2,1,1,4,2,1,2,3,4,5,3,"Scenario A"  
13 74,2,2,1,2,3,4,2,1,1,3,1,1,4,5,"Scenario B"  
14 74,1,2,1,1,3,2,1,2,1,1,2,4,3,1,"Scenario A"  
15 74,1,2,2,2,2,3,2,2,2,3,1,4,5,1,"Scenario A"  
16 74,2,1,2,1,2,1,4,1,1,1,3,2,5,2,"Scenario B"  
17 74,2,1,1,3,1,2,1,1,2,3,2,4,3,4,"Scenario A"  
18 74,1,1,3,3,1,5,2,2,2,2,1,3,1,3,"Scenario A"  
19 74,1,1,2,2,3,3,3,2,2,3,1,2,4,5,"Scenario A"  
20 74,1,2,2,3,1,5,4,2,1,3,2,4,2,5,"Scenario A"  
21 190,2,1,2,2,3,2,1,1,2,3,2,1,5,4,"Scenario A"  
22 190,1,2,2,3,2,1,5,2,1,1,1,4,3,3,"Scenario A"  
23 190,2,2,1,1,2,4,5,1,2,2,2,3,1,1,"Scenario B"  
24 190,1,1,3,3,1,4,1,2,2,1,2,4,3,2,"Scenario B"  
25 190,2,1,2,1,4,2,3,1,1,3,3,1,5,3,"Scenario A"  
26 190,2,2,3,1,1,1,1,1,1,1,3,3,3,4,"Scenario A"  
27 190,1,2,1,2,3,2,4,2,1,2,2,2,5,3,"Scenario A"  
28 190,2,2,3,3,4,3,5,2,1,2,1,3,5,2,"Scenario A"  
29 190,1,2,1,1,2,4,5,2,1,3,3,4,2,4,"Scenario B"  
30 190,1,1,2,2,2,1,1,2,2,3,1,1,1,2,"Scenario A"  
31 75,1,2,2,2,4,3,2,1,1,1,3,3,4,3,"Scenario A"  
32 75,2,1,3,1,2,5,4,1,2,1,3,4,2,1,"Scenario B"  
33 75,1,1,1,3,1,4,5,2,2,2,2,2,3,5,"Scenario B"  
34 75,2,1,2,2,1,4,1,1,2,2,1,3,1,2,"Scenario B"  
35 75,1,1,3,2,2,2,3,2,2,3,3,1,2,4,"Scenario B"  
36 75,2,1,1,1,4,1,2,1,2,3,2,2,5,3,"Scenario B"  
37 75,2,1,1,2,1,4,4,1,2,3,1,3,3,5,"Scenario B"  
38 75,2,2,2,3,3,5,4,1,2,2,3,4,4,1,"Scenario A"  
39 75,1,1,2,1,4,3,5,2,1,1,2,3,5,1,"Scenario A"  
40 75,1,1,3,1,1,1,2,2,2,3,3,2,4,1,"Scenario B"  
41 76,2,1,2,3,1,3,1,1,2,1,1,1,2,2,"Scenario A"  
42 76,1,1,2,1,2,2,3,2,2,3,2,4,1,2,"Scenario B"  
43 76,2,1,3,2,3,5,5,1,2,1,3,4,4,4,"Scenario A"  
44 76,1,2,3,3,1,4,3,2,1,1,1,2,1,4,"Scenario B"  
45 76,1,1,2,1,4,5,5,2,2,1,2,3,4,1,"Scenario B"  
46 76,2,1,2,3,1,1,3,1,2,2,1,2,3,1,"Scenario B"  
47 76,1,2,1,2,1,3,4,2,1,3,3,3,5,1,"Scenario B"  
48 76,2,2,3,2,1,1,5,1,1,2,3,4,2,2,"Scenario B"  
49 76,2,2,3,1,2,4,2,1,1,1,2,2,2,5,"Scenario A"  
50 76,2,2,1,1,3,3,4,1,1,2,3,1,3,5,"Scenario A"  
51 77,1,1,3,3,3,1,2,1,2,2,3,2,2,5,"Scenario A"  
52 77,1,2,3,2,1,1,4,2,1,2,3,4,5,3,"Scenario A"  
53 77,2,2,1,2,3,4,2,1,1,3,1,1,4,5,"Scenario A"  
54 77,1,2,1,1,3,2,1,2,1,1,2,4,3,1,"Scenario A"  
55 77,1,2,2,2,2,3,2,2,2,3,1,4,5,1,"Scenario B"  
56 77,2,1,2,1,2,1,4,1,1,1,3,2,5,2,"Scenario B"  
57 77,2,1,1,3,1,2,1,1,2,3,2,4,3,4,"Scenario A"  
58 77,1,1,3,3,1,5,2,2,2,2,1,3,1,3,"Scenario B"  
59 77,1,1,2,2,3,3,3,2,2,3,1,2,4,5,"Scenario A"  
60

1  
2  
3 77,1,2,2,3,1,5,4,2,1,3,2,4,2,5,"Scenario A"  
4 78,2,1,2,2,3,2,1,1,2,3,2,1,5,4,"Scenario B"  
5 78,1,2,2,3,2,1,5,2,1,1,1,4,3,3,"Scenario A"  
6 78,2,2,1,1,2,4,5,1,2,2,2,3,1,1,"Scenario B"  
7 78,1,1,3,3,1,4,1,2,2,1,2,4,3,2,"Scenario A"  
8 78,2,1,2,1,4,2,3,1,1,3,3,1,5,3,"Scenario B"  
9 78,2,2,3,1,1,1,1,1,1,1,3,3,3,4,"Scenario A"  
10 78,1,2,1,2,3,2,4,2,1,2,2,2,5,3,"Scenario A"  
11 78,2,2,3,3,4,3,5,2,1,2,1,3,5,2,"Scenario B"  
12 78,1,2,1,1,2,4,5,2,1,3,3,4,2,4,"Scenario B"  
13 78,1,1,2,2,2,1,1,2,2,3,1,1,1,2,"Scenario A"  
14 189,1,2,2,2,4,3,2,1,1,1,3,3,4,3,"Scenario A"  
15 189,2,1,3,1,2,5,4,1,2,1,3,4,2,1,"Scenario A"  
16 189,1,1,1,3,1,4,5,2,2,2,2,2,3,5,"Scenario B"  
17 189,2,1,2,2,1,4,1,1,2,2,1,3,1,2,"Scenario A"  
18 189,1,1,3,2,2,2,3,2,2,3,3,1,2,4,"Scenario B"  
19 189,2,1,1,1,4,1,2,1,2,3,2,2,5,3,"Scenario B"  
20 189,2,1,1,2,1,4,4,1,2,3,1,3,3,5,"Scenario A"  
21 189,2,2,2,3,3,5,4,1,2,2,3,4,4,1,"Scenario A"  
22 189,1,1,2,1,4,3,5,2,1,1,2,3,5,1,"Scenario B"  
23 189,1,1,3,1,1,1,2,2,2,3,3,2,4,1,"Scenario A"  
24 72,2,1,2,3,1,3,1,1,2,1,1,1,2,2,"Scenario A"  
25 72,1,1,2,1,2,2,3,2,2,3,2,4,1,2,"Scenario A"  
26 72,2,1,3,2,3,5,5,1,2,1,3,4,4,4,"Scenario A"  
27 72,1,2,3,3,1,4,3,2,1,1,1,2,1,4,"Scenario A"  
28 72,1,1,2,1,4,5,5,2,2,1,2,3,4,1,"Scenario B"  
29 72,2,1,2,3,1,1,3,1,2,2,1,2,3,1,"Scenario A"  
30 72,1,2,1,2,1,3,4,2,1,3,3,3,5,1,"Scenario A"  
31 72,2,2,3,2,1,1,5,1,1,2,3,4,2,2,"Scenario A"  
32 72,2,2,3,1,2,4,2,1,1,1,2,2,2,5,"Scenario A"  
33 72,2,2,1,1,3,3,4,1,1,2,3,1,3,5,"Scenario B"  
34 95,1,1,3,3,3,1,2,1,2,2,3,2,2,5,"Scenario A"  
35 95,1,2,3,2,1,1,4,2,1,2,3,4,5,3,"Scenario B"  
36 95,2,2,1,2,3,4,2,1,1,3,1,1,4,5,"Scenario B"  
37 95,1,2,1,1,3,2,1,2,1,1,2,4,3,1,"Scenario B"  
38 95,1,2,2,2,2,3,2,2,2,3,1,4,5,1,"Scenario B"  
39 95,2,1,2,1,2,1,4,1,1,1,3,2,5,2,"Scenario A"  
40 95,2,1,1,3,1,2,1,1,2,3,2,4,3,4,"Scenario A"  
41 95,1,1,3,3,1,5,2,2,2,2,1,3,1,3,"Scenario A"  
42 95,1,1,2,2,3,3,3,2,2,3,1,2,4,5,"Scenario B"  
43 95,1,2,2,3,1,5,4,2,1,3,2,4,2,5,"Scenario B"  
44 191,2,1,2,2,3,2,1,1,2,3,2,1,5,4,"Scenario B"  
45 191,1,2,2,3,2,1,5,2,1,1,1,4,3,3,"Scenario A"  
46 191,2,2,1,1,2,4,5,1,2,2,2,3,1,1,"Scenario B"  
47 191,1,1,3,3,1,4,1,2,2,1,2,4,3,2,"Scenario A"  
48 191,2,1,2,1,4,2,3,1,1,3,3,1,5,3,"Scenario B"  
49 191,2,2,3,1,1,1,1,1,1,1,3,3,3,4,"Scenario A"  
50 191,1,2,1,2,3,2,4,2,1,2,2,2,5,3,"Scenario A"  
51 191,2,2,3,3,4,3,5,2,1,2,1,3,5,2,"Scenario A"  
52 191,1,2,1,1,2,4,5,2,1,3,3,4,2,4,"Scenario A"  
53 191,1,1,2,2,2,1,1,2,2,3,1,1,1,2,"Scenario B"  
54 79,1,2,2,2,4,3,2,1,1,1,3,3,4,3,"Scenario A"  
55 79,2,1,3,1,2,5,4,1,2,1,3,4,2,1,"Scenario B"  
56 79,1,1,1,3,1,4,5,2,2,2,2,2,3,5,"Scenario A"  
57 79,2,1,2,2,1,4,1,1,2,2,1,3,1,2,"Scenario A"  
58 79,1,1,3,2,2,2,3,2,2,3,3,1,2,4,"Scenario A"  
59 79,2,1,1,1,4,1,2,1,2,3,2,2,5,3,"Scenario A"  
60

1  
2  
3 79,2,1,1,2,1,4,4,1,2,3,1,3,3,5,"Scenario A"  
4 79,2,2,2,3,3,5,4,1,2,2,3,4,4,1,"Scenario B"  
5 79,1,1,2,1,4,3,5,2,1,1,2,3,5,1,"Scenario B"  
6 79,1,1,3,1,1,1,2,2,2,3,3,2,4,1,"Scenario B"  
7 80,2,1,2,3,1,3,1,1,2,1,1,1,2,2,"Scenario A"  
8 80,1,1,2,1,2,2,3,2,2,3,2,4,1,2,"Scenario B"  
9 80,2,1,3,2,3,5,5,1,2,1,3,4,4,4,"Scenario B"  
10 80,1,2,3,3,1,4,3,2,1,1,1,2,1,4,"Scenario A"  
11 80,1,1,2,1,4,5,5,2,2,1,2,3,4,1,"Scenario B"  
12 80,2,1,2,3,1,1,3,1,2,2,1,2,3,1,"Scenario B"  
13 80,1,2,1,2,1,3,4,2,1,3,3,3,5,1,"Scenario B"  
14 80,2,2,3,2,1,1,5,1,1,2,3,4,2,2,"Scenario B"  
15 80,2,2,3,1,2,4,2,1,1,1,2,2,2,5,"Scenario A"  
16 80,2,2,1,1,3,3,4,1,1,2,3,1,3,5,"Scenario A"  
17 417,1,1,3,3,3,1,2,1,2,2,3,2,2,5,"Scenario A"  
18 417,1,2,3,2,1,1,4,2,1,2,3,4,5,3,"Scenario A"  
19 417,2,2,1,2,3,4,2,1,1,3,1,1,4,5,"Scenario A"  
20 417,1,2,1,1,3,2,1,2,1,1,2,4,3,1,"Scenario A"  
21 417,1,2,2,2,2,3,2,2,2,3,1,4,5,1,"Scenario B"  
22 417,2,1,2,1,2,1,4,1,1,1,3,2,5,2,"Scenario B"  
23 417,2,1,1,3,1,2,1,1,2,3,2,4,3,4,"Scenario A"  
24 417,1,1,3,3,1,5,2,2,2,2,1,3,1,3,"Scenario A"  
25 417,1,1,2,2,3,3,3,2,2,3,1,2,4,5,"Scenario A"  
26 417,1,2,2,3,1,5,4,2,1,3,2,4,2,5,"Scenario A"  
27 416,2,1,2,2,3,2,1,1,2,3,2,1,5,4,"Scenario A"  
28 416,1,2,2,3,2,1,5,2,1,1,1,4,3,3,"Scenario B"  
29 416,2,2,1,1,2,4,5,1,2,2,2,3,1,1,"Scenario B"  
30 416,1,1,3,3,1,4,1,2,2,1,2,4,3,2,"Scenario A"  
31 416,2,1,2,1,4,2,3,1,1,3,3,1,5,3,"Scenario A"  
32 416,2,2,3,1,1,1,1,1,1,1,3,3,3,4,"Scenario A"  
33 416,1,2,1,2,3,2,4,2,1,2,2,2,5,3,"Scenario B"  
34 416,2,2,3,3,4,3,5,2,1,2,1,3,5,2,"Scenario B"  
35 416,1,2,1,1,2,4,5,2,1,3,3,4,2,4,"Scenario A"  
36 416,1,1,2,2,2,1,1,2,2,3,1,1,1,2,"Scenario A"  
37 381,1,2,2,2,4,3,2,1,1,1,3,3,4,3,"Scenario A"  
38 381,2,1,3,1,2,5,4,1,2,1,3,4,2,1,"Scenario A"  
39 381,1,1,1,3,1,4,5,2,2,2,2,2,3,5,"Scenario A"  
40 381,2,1,2,2,1,4,1,1,2,2,1,3,1,2,"Scenario A"  
41 381,1,1,3,2,2,2,3,2,2,3,3,1,2,4,"Scenario A"  
42 381,2,1,1,1,4,1,2,1,2,3,2,2,5,3,"Scenario B"  
43 381,2,1,1,2,1,4,4,1,2,3,1,3,3,5,"Scenario A"  
44 381,2,2,2,3,3,5,4,1,2,2,3,4,4,1,"Scenario A"  
45 381,1,1,2,1,4,3,5,2,1,1,2,3,5,1,"Scenario B"  
46 381,1,1,3,1,1,1,2,2,2,3,3,2,4,1,"Scenario A"  
47 390,2,1,2,3,1,3,1,1,2,1,1,1,2,2,"Scenario B"  
48 390,1,1,2,1,2,2,3,2,2,3,2,4,1,2,"Scenario A"  
49 390,2,1,3,2,3,5,5,1,2,1,3,4,4,4,"Scenario A"  
50 390,1,2,3,3,1,4,3,2,1,1,1,2,1,4,"Scenario A"  
51 390,1,1,2,1,4,5,5,2,2,1,2,3,4,1,"Scenario B"  
52 390,2,1,2,3,1,1,3,1,2,2,1,2,3,1,"Scenario A"  
53 390,1,2,1,2,1,3,4,2,1,3,3,3,5,1,"Scenario A"  
54 390,2,2,3,2,1,1,5,1,1,2,3,4,2,2,"Scenario A"  
55 390,2,2,3,1,2,4,2,1,1,1,2,2,2,5,"Scenario B"  
56 390,2,2,1,1,3,3,4,1,1,2,3,1,3,5,"Scenario B"  
57 391,1,1,3,3,3,1,2,1,2,2,3,2,2,5,"Scenario B"  
58 391,1,2,3,2,1,1,4,2,1,2,3,4,5,3,"Scenario A"  
59 391,2,2,1,2,3,4,2,1,1,3,1,1,4,5,"Scenario B"  
60

1  
2  
3 391,1,2,1,1,3,2,1,2,1,1,2,4,3,1,"Scenario A"  
4 391,1,2,2,2,2,3,2,2,2,3,1,4,5,1,"Scenario A"  
5 391,2,1,2,1,2,1,4,1,1,1,3,2,5,2,"Scenario A"  
6 391,2,1,1,3,1,2,1,1,2,3,2,4,3,4,"Scenario A"  
7 391,1,1,3,3,1,5,2,2,2,2,1,3,1,3,"Scenario A"  
8 391,1,1,2,2,3,3,3,2,2,3,1,2,4,5,"Scenario A"  
9 391,1,2,2,3,1,5,4,2,1,3,2,4,2,5,"Scenario A"  
10 389,2,1,2,2,3,2,1,1,2,3,2,1,5,4,"Scenario A"  
11 389,1,2,2,3,2,1,5,2,1,1,1,4,3,3,"Scenario A"  
12 389,2,2,1,1,2,4,5,1,2,2,2,3,1,1,"Scenario A"  
13 389,1,1,3,3,1,4,1,2,2,1,2,4,3,2,"Scenario A"  
14 389,2,1,2,1,4,2,3,1,1,3,3,1,5,3,"Scenario A"  
15 389,2,2,3,1,1,1,1,1,1,1,3,3,3,4,"Scenario A"  
16 389,1,2,1,2,3,2,4,2,1,2,2,2,5,3,"Scenario A"  
17 389,2,2,3,3,4,3,5,2,1,2,1,3,5,2,"Scenario B"  
18 389,1,2,1,1,2,4,5,2,1,3,3,4,2,4,"Scenario B"  
19 389,1,1,2,2,2,1,1,2,2,3,1,1,1,2,"Scenario A"  
20 380,1,2,2,2,4,3,2,1,1,1,3,3,4,3,"Scenario A"  
21 380,2,1,3,1,2,5,4,1,2,1,3,4,2,1,"Scenario A"  
22 380,1,1,1,3,1,4,5,2,2,2,2,2,3,5,"Scenario A"  
23 380,2,1,2,2,1,4,1,1,2,2,1,3,1,2,"Scenario A"  
24 380,1,1,3,2,2,2,3,2,2,3,3,1,2,4,"Scenario A"  
25 380,2,1,1,1,4,1,2,1,2,3,2,2,5,3,"Scenario B"  
26 380,2,1,1,2,1,4,4,1,2,3,1,3,3,5,"Scenario A"  
27 380,2,2,2,3,3,5,4,1,2,2,3,4,4,1,"Scenario A"  
28 380,1,1,2,1,4,3,5,2,1,1,2,3,5,1,"Scenario B"  
29 380,1,1,3,1,1,1,2,2,2,3,3,2,4,1,"Scenario A"  
30 382,2,1,2,3,1,3,1,1,2,1,1,1,2,2,"Scenario B"  
31 382,1,1,2,1,2,2,3,2,2,3,2,4,1,2,"Scenario A"  
32 382,2,1,3,2,3,5,5,1,2,1,3,4,4,4,"Scenario A"  
33 382,1,2,3,3,1,4,3,2,1,1,1,2,1,4,"Scenario A"  
34 382,1,1,2,1,4,5,5,2,2,1,2,3,4,1,"Scenario B"  
35 382,2,1,2,3,1,1,3,1,2,2,1,2,3,1,"Scenario A"  
36 382,1,2,1,2,1,3,4,2,1,3,3,3,5,1,"Scenario A"  
37 382,2,2,3,2,1,1,5,1,1,2,3,4,2,2,"Scenario A"  
38 382,2,2,3,1,2,4,2,1,1,1,2,2,2,5,"Scenario B"  
39 382,2,2,1,1,3,3,4,1,1,2,3,1,3,5,"Scenario B"  
40 383,1,1,3,3,3,1,2,1,2,2,3,2,2,5,"Scenario B"  
41 383,1,2,3,2,1,1,4,2,1,2,3,4,5,3,"Scenario A"  
42 383,2,2,1,2,3,4,2,1,1,3,1,1,4,5,"Scenario B"  
43 383,1,2,1,1,3,2,1,2,1,1,2,4,3,1,"Scenario A"  
44 383,1,2,2,2,2,3,2,2,2,3,1,4,5,1,"Scenario A"  
45 383,2,1,2,1,2,1,4,1,1,1,3,2,5,2,"Scenario A"  
46 383,2,1,1,3,1,2,1,1,2,3,2,4,3,4,"Scenario B"  
47 383,1,1,3,3,1,5,2,2,2,2,1,3,1,3,"Scenario B"  
48 383,1,1,2,2,3,3,3,2,2,3,1,2,4,5,"Scenario A"  
49 383,1,2,2,3,1,5,4,2,1,3,2,4,2,5,"Scenario A"  
50 384,2,1,2,2,3,2,1,1,2,3,2,1,5,4,"Scenario A"  
51 384,1,2,2,3,2,1,5,2,1,1,1,4,3,3,"Scenario B"  
52 384,2,2,1,1,2,4,5,1,2,2,2,3,1,1,"Scenario A"  
53 384,1,1,3,3,1,4,1,2,2,1,2,4,3,2,"Scenario A"  
54 384,2,1,2,1,4,2,3,1,1,3,3,1,5,3,"Scenario A"  
55 384,2,2,3,1,1,1,1,1,1,1,3,3,3,4,"Scenario A"  
56 384,1,2,1,2,3,2,4,2,1,2,2,2,5,3,"Scenario B"  
57 384,2,2,3,3,4,3,5,2,1,2,1,3,5,2,"Scenario B"  
58 384,1,2,1,1,2,4,5,2,1,3,3,4,2,4,"Scenario A"  
59 384,1,1,2,2,2,1,1,2,2,3,1,1,1,2,"Scenario B"  
60

1  
2  
3 385,1,2,2,2,4,3,2,1,1,1,3,3,4,3,"Scenario A"  
4 385,2,1,3,1,2,5,4,1,2,1,3,4,2,1,"Scenario A"  
5 385,1,1,1,3,1,4,5,2,2,2,2,2,3,5,"Scenario A"  
6 385,2,1,2,2,1,4,1,1,2,2,1,3,1,2,"Scenario A"  
7 385,1,1,3,2,2,2,3,2,2,3,3,1,2,4,"Scenario B"  
8 385,2,1,1,1,4,1,2,1,2,3,2,2,5,3,"Scenario B"  
9 385,2,1,1,2,1,4,4,1,2,3,1,3,3,5,"Scenario A"  
10 385,2,2,2,3,3,5,4,1,2,2,3,4,4,1,"Scenario A"  
11 385,1,1,2,1,4,3,5,2,1,1,2,3,5,1,"Scenario B"  
12 385,1,1,3,1,1,1,2,2,2,3,3,2,4,1,"Scenario A"  
13 388,2,1,2,3,1,3,1,1,2,1,1,1,2,2,"Scenario A"  
14 388,1,1,2,1,2,2,3,2,2,3,2,4,1,2,"Scenario A"  
15 388,2,1,3,2,3,5,5,1,2,1,3,4,4,4,"Scenario A"  
16 388,1,2,3,3,1,4,3,2,1,1,1,2,1,4,"Scenario B"  
17 388,1,1,2,1,4,5,5,2,2,1,2,3,4,1,"Scenario A"  
18 388,2,1,2,3,1,1,3,1,2,2,1,2,3,1,"Scenario A"  
19 388,1,2,1,2,1,3,4,2,1,3,3,3,5,1,"Scenario A"  
20 388,2,2,3,2,1,1,5,1,1,2,3,4,2,2,"Scenario A"  
21 388,2,2,3,1,2,4,2,1,1,1,2,2,2,5,"Scenario B"  
22 388,2,2,1,1,3,3,4,1,1,2,3,1,3,5,"Scenario A"  
23 378,1,1,3,3,3,1,2,1,2,2,3,2,2,5,"Scenario B"  
24 378,1,2,3,2,1,1,4,2,1,2,3,4,5,3,"Scenario A"  
25 378,2,2,1,2,3,4,2,1,1,3,1,1,4,5,"Scenario B"  
26 378,1,2,1,1,3,2,1,2,1,1,2,4,3,1,"Scenario A"  
27 378,1,2,2,2,2,3,2,2,2,3,1,4,5,1,"Scenario A"  
28 378,2,1,2,1,2,1,4,1,1,1,3,2,5,2,"Scenario A"  
29 378,2,1,1,3,1,2,1,1,2,3,2,4,3,4,"Scenario A"  
30 378,1,1,3,3,1,5,2,2,2,2,1,3,1,3,"Scenario A"  
31 378,1,1,2,2,3,3,3,2,2,3,1,2,4,5,"Scenario B"  
32 378,1,2,2,3,1,5,4,2,1,3,2,4,2,5,"Scenario A"  
33 379,2,1,2,2,3,2,1,1,2,3,2,1,5,4,"Scenario A"  
34 379,1,2,2,3,2,1,5,2,1,1,1,4,3,3,"Scenario B"  
35 379,2,2,1,1,2,4,5,1,2,2,2,3,1,1,"Scenario B"  
36 379,1,1,3,3,1,4,1,2,2,1,2,4,3,2,"Scenario A"  
37 379,2,1,2,1,4,2,3,1,1,3,3,1,5,3,"Scenario B"  
38 379,2,2,3,1,1,1,1,1,1,1,3,3,3,4,"Scenario B"  
39 379,1,2,1,2,3,2,4,2,1,2,2,2,5,3,"Scenario B"  
40 379,2,2,3,3,4,3,5,2,1,2,1,3,5,2,"Scenario A"  
41 379,1,2,1,1,2,4,5,2,1,3,3,4,2,4,"Scenario A"  
42 379,1,1,2,2,2,1,1,2,2,3,1,1,1,2,"Scenario B"  
43 392,1,2,2,2,4,3,2,1,1,1,3,3,4,3,"Scenario A"  
44 392,2,1,3,1,2,5,4,1,2,1,3,4,2,1,"Scenario A"  
45 392,1,1,1,3,1,4,5,2,2,2,2,2,3,5,"Scenario A"  
46 392,2,1,2,2,1,4,1,1,2,2,1,3,1,2,"Scenario A"  
47 392,1,1,3,2,2,2,3,2,2,3,3,1,2,4,"Scenario A"  
48 392,2,1,1,1,4,1,2,1,2,3,2,2,5,3,"Scenario A"  
49 392,2,1,1,2,1,4,4,1,2,3,1,3,3,5,"Scenario B"  
50 392,2,2,2,3,3,5,4,1,2,2,3,4,4,1,"Scenario A"  
51 392,1,1,2,1,4,3,5,2,1,1,2,3,5,1,"Scenario A"  
52 392,1,1,3,1,1,1,2,2,2,3,3,2,4,1,"Scenario B"  
53 412,2,1,2,3,1,3,1,1,2,1,1,1,2,2,"Scenario A"  
54 412,1,1,2,1,2,2,3,2,2,3,2,4,1,2,"Scenario B"  
55 412,2,1,3,2,3,5,5,1,2,1,3,4,4,4,"Scenario B"  
56 412,1,2,3,3,1,4,3,2,1,1,1,2,1,4,"Scenario A"  
57 412,1,1,2,1,4,5,5,2,2,1,2,3,4,1,"Scenario B"  
58 412,2,1,2,3,1,1,3,1,2,2,1,2,3,1,"Scenario B"  
59 412,1,2,1,2,1,3,4,2,1,3,3,3,5,1,"Scenario B"  
60

1  
2  
3 412,2,2,3,2,1,1,5,1,1,2,3,4,2,2,"Scenario B"  
4 412,2,2,3,1,2,4,2,1,1,1,2,2,2,5,"Scenario A"  
5 412,2,2,1,1,3,3,4,1,1,2,3,1,3,5,"Scenario A"  
6 413,1,1,3,3,3,1,2,1,2,2,3,2,2,5,"Scenario A"  
7 413,1,2,3,2,1,1,4,2,1,2,3,4,5,3,"Scenario B"  
8 413,2,2,1,2,3,4,2,1,1,3,1,1,4,5,"Scenario A"  
9 413,1,2,1,1,3,2,1,2,1,1,2,4,3,1,"Scenario A"  
10 413,1,2,2,2,2,3,2,2,2,3,1,4,5,1,"Scenario B"  
11 413,2,1,2,1,2,1,4,1,1,1,3,2,5,2,"Scenario B"  
12 413,2,1,1,3,1,2,1,1,2,3,2,4,3,4,"Scenario A"  
13 413,1,1,3,3,1,5,2,2,2,2,1,3,1,3,"Scenario A"  
14 413,1,1,2,2,3,3,3,2,2,3,1,2,4,5,"Scenario A"  
15 413,1,2,2,3,1,5,4,2,1,3,2,4,2,5,"Scenario A"  
16 415,2,1,2,2,3,2,1,1,2,3,2,1,5,4,"Scenario B"  
17 415,1,2,2,3,2,1,5,2,1,1,1,4,3,3,"Scenario A"  
18 415,2,2,1,1,2,4,5,1,2,2,2,3,1,1,"Scenario B"  
19 415,1,1,3,3,1,4,1,2,2,1,2,4,3,2,"Scenario B"  
20 415,2,1,2,1,4,2,3,1,1,3,3,1,5,3,"Scenario B"  
21 415,2,2,3,1,1,1,1,1,1,1,3,3,3,4,"Scenario A"  
22 415,1,2,1,2,3,2,4,2,1,2,2,2,5,3,"Scenario A"  
23 415,2,2,3,3,4,3,5,2,1,2,1,3,5,2,"Scenario A"  
24 415,1,2,1,1,2,4,5,2,1,3,3,4,2,4,"Scenario A"  
25 415,1,1,2,2,2,1,1,2,2,3,1,1,1,2,"Scenario B"  
26 414,1,2,2,2,4,3,2,1,1,1,3,3,4,3,"Scenario A"  
27 414,2,1,3,1,2,5,4,1,2,1,3,4,2,1,"Scenario A"  
28 414,1,1,1,3,1,4,5,2,2,2,2,2,3,5,"Scenario A"  
29 414,2,1,2,2,1,4,1,1,2,2,1,3,1,2,"Scenario A"  
30 414,1,1,3,2,2,2,3,2,2,3,3,1,2,4,"Scenario A"  
31 414,2,1,1,1,4,1,2,1,2,3,2,2,5,3,"Scenario A"  
32 414,2,1,1,2,1,4,4,1,2,3,1,3,3,5,"Scenario A"  
33 414,2,2,2,3,3,5,4,1,2,2,3,4,4,1,"Scenario A"  
34 414,1,1,2,1,4,3,5,2,1,1,2,3,5,1,"Scenario A"  
35 414,1,1,3,1,1,1,2,2,2,3,3,2,4,1,"Scenario A"  
36 411,2,1,2,3,1,3,1,1,2,1,1,1,2,2,"Scenario B"  
37 411,1,1,2,1,2,2,3,2,2,3,2,4,1,2,"Scenario B"  
38 411,2,1,3,2,3,5,5,1,2,1,3,4,4,4,"Scenario A"  
39 411,1,2,3,3,1,4,3,2,1,1,1,2,1,4,"Scenario B"  
40 411,1,1,2,1,4,5,5,2,2,1,2,3,4,1,"Scenario A"  
41 411,2,1,2,3,1,1,3,1,2,2,1,2,3,1,"Scenario A"  
42 411,1,2,1,2,1,3,4,2,1,3,3,3,5,1,"Scenario B"  
43 411,2,2,3,2,1,1,5,1,1,2,3,4,2,2,"Scenario A"  
44 411,2,2,3,1,2,4,2,1,1,1,2,2,2,5,"Scenario B"  
45 411,2,2,1,1,3,3,4,1,1,2,3,1,3,5,"Scenario B"  
46 297,1,1,3,3,3,1,2,1,2,2,3,2,2,5,"Scenario A"  
47 297,1,2,3,2,1,1,4,2,1,2,3,4,5,3,"Scenario A"  
48 297,2,2,1,2,3,4,2,1,1,3,1,1,4,5,"Scenario B"  
49 297,1,2,1,1,3,2,1,2,1,1,2,4,3,1,"Scenario A"  
50 297,1,2,2,2,2,3,2,2,2,3,1,4,5,1,"Scenario A"  
51 297,2,1,2,1,2,1,4,1,1,1,3,2,5,2,"Scenario B"  
52 297,2,1,1,3,1,2,1,1,2,3,2,4,3,4,"Scenario A"  
53 297,1,1,3,3,1,5,2,2,2,2,1,3,1,3,"Scenario A"  
54 297,1,1,2,2,3,3,3,2,2,3,1,2,4,5,"Scenario A"  
55 297,1,2,2,3,1,5,4,2,1,3,2,4,2,5,"Scenario A"  
56 300,2,1,2,2,3,2,1,1,2,3,2,1,5,4,"Scenario B"  
57 300,1,2,2,3,2,1,5,2,1,1,1,4,3,3,"Scenario A"  
58 300,2,2,1,1,2,4,5,1,2,2,2,3,1,1,"Scenario B"  
59 300,1,1,3,3,1,4,1,2,2,1,2,4,3,2,"Scenario A"  
60

1  
2  
3 300,2,1,2,1,4,2,3,1,1,3,3,1,5,3,"Scenario B"  
4 300,2,2,3,1,1,1,1,1,1,1,3,3,3,4,"Scenario A"  
5 300,1,2,1,2,3,2,4,2,1,2,2,2,5,3,"Scenario B"  
6 300,2,2,3,3,4,3,5,2,1,2,1,3,5,2,"Scenario B"  
7 300,1,2,1,1,2,4,5,2,1,3,3,4,2,4,"Scenario A"  
8 300,1,1,2,2,2,1,1,2,2,3,1,1,1,2,"Scenario A"  
9 299,1,2,2,2,4,3,2,1,1,1,3,3,4,3,"Scenario B"  
10 299,2,1,3,1,2,5,4,1,2,1,3,4,2,1,"Scenario B"  
11 299,1,1,1,3,1,4,5,2,2,2,2,2,3,5,"Scenario A"  
12 299,2,1,2,2,1,4,1,1,2,2,1,3,1,2,"Scenario B"  
13 299,1,1,3,2,2,2,3,2,2,3,3,1,2,4,"Scenario A"  
14 299,2,1,1,1,4,1,2,1,2,3,2,2,5,3,"Scenario B"  
15 299,2,1,1,2,1,4,4,1,2,3,1,3,3,5,"Scenario A"  
16 299,2,2,2,3,3,5,4,1,2,2,3,4,4,1,"Scenario B"  
17 299,1,1,2,1,4,3,5,2,1,1,2,3,5,1,"Scenario B"  
18 299,1,1,3,1,1,1,2,2,2,3,3,2,4,1,"Scenario B"  
19 298,2,1,2,3,1,3,1,1,2,1,1,1,2,2,"Scenario B"  
20 298,1,1,2,1,2,2,3,2,2,3,2,4,1,2,"Scenario A"  
21 298,2,1,3,2,3,5,5,1,2,1,3,4,4,4,"Scenario B"  
22 298,1,2,3,3,1,4,3,2,1,1,1,2,1,4,"Scenario A"  
23 298,1,1,2,1,4,5,5,2,2,1,2,3,4,1,"Scenario B"  
24 298,2,1,2,3,1,1,3,1,2,2,1,2,3,1,"Scenario B"  
25 298,1,2,1,2,1,3,4,2,1,3,3,3,5,1,"Scenario B"  
26 298,2,2,3,2,1,1,5,1,1,2,3,4,2,2,"Scenario A"  
27 298,2,2,3,1,2,4,2,1,1,1,2,2,2,5,"Scenario A"  
28 298,2,2,1,1,3,3,4,1,1,2,3,1,3,5,"Scenario B"  
29 303,1,1,3,3,3,1,2,1,2,2,3,2,2,5,"Scenario B"  
30 303,1,2,3,2,1,1,4,2,1,2,3,4,5,3,"Scenario A"  
31 303,2,2,1,2,3,4,2,1,1,3,1,1,4,5,"Scenario A"  
32 303,1,2,1,1,3,2,1,2,1,1,2,4,3,1,"Scenario B"  
33 303,1,2,2,2,2,3,2,2,2,3,1,4,5,1,"Scenario B"  
34 303,2,1,2,1,2,1,4,1,1,1,3,2,5,2,"Scenario B"  
35 303,2,1,1,3,1,2,1,1,2,3,2,4,3,4,"Scenario A"  
36 303,1,1,3,3,1,5,2,2,2,2,1,3,1,3,"Scenario A"  
37 303,1,1,2,2,3,3,3,2,2,3,1,2,4,5,"Scenario A"  
38 303,1,2,2,3,1,5,4,2,1,3,2,4,2,5,"Scenario A"  
39 292,2,1,2,2,3,2,1,1,2,3,2,1,5,4,"Scenario A"  
40 292,1,2,2,3,2,1,5,2,1,1,1,4,3,3,"Scenario B"  
41 292,2,2,1,1,2,4,5,1,2,2,2,3,1,1,"Scenario A"  
42 292,1,1,3,3,1,4,1,2,2,1,2,4,3,2,"Scenario A"  
43 292,2,1,2,1,4,2,3,1,1,3,3,1,5,3,"Scenario A"  
44 292,2,2,3,1,1,1,1,1,1,1,3,3,3,4,"Scenario A"  
45 292,1,2,1,2,3,2,4,2,1,2,2,2,5,3,"Scenario B"  
46 292,2,2,3,3,4,3,5,2,1,2,1,3,5,2,"Scenario B"  
47 292,1,2,1,1,2,4,5,2,1,3,3,4,2,4,"Scenario B"  
48 292,1,1,2,2,2,1,1,2,2,3,1,1,1,2,"Scenario A"  
49 301,1,2,2,2,4,3,2,1,1,1,3,3,4,3,"Scenario A"  
50 301,2,1,3,1,2,5,4,1,2,1,3,4,2,1,"Scenario A"  
51 301,1,1,1,3,1,4,5,2,2,2,2,2,3,5,"Scenario A"  
52 301,2,1,2,2,1,4,1,1,2,2,1,3,1,2,"Scenario A"  
53 301,1,1,3,2,2,2,3,2,2,3,3,1,2,4,"Scenario B"  
54 301,2,1,1,1,4,1,2,1,2,3,2,2,5,3,"Scenario A"  
55 301,2,1,1,2,1,4,4,1,2,3,1,3,3,5,"Scenario A"  
56 301,2,2,2,3,3,5,4,1,2,2,3,4,4,1,"Scenario B"  
57 301,1,1,2,1,4,3,5,2,1,1,2,3,5,1,"Scenario A"  
58 301,1,1,3,1,1,1,2,2,2,3,3,2,4,1,"Scenario B"  
59 290,2,1,2,3,1,3,1,1,2,1,1,1,2,2,"Scenario A"  
60



1  
2  
3 290,1,1,2,1,2,2,3,2,2,3,2,4,1,2,"Scenario B"  
4 290,2,1,3,2,3,5,5,1,2,1,3,4,4,4,"Scenario B"  
5 290,1,2,3,3,1,4,3,2,1,1,1,2,1,4,"Scenario A"  
6 290,1,1,2,1,4,5,5,2,2,1,2,3,4,1,"Scenario B"  
7 290,2,1,2,3,1,1,3,1,2,2,1,2,3,1,"Scenario B"  
8 290,1,2,1,2,1,3,4,2,1,3,3,3,5,1,"Scenario A"  
9 290,2,2,3,2,1,1,5,1,1,2,3,4,2,2,"Scenario B"  
10 290,2,2,3,1,2,4,2,1,1,1,2,2,2,5,"Scenario A"  
11 290,2,2,1,1,3,3,4,1,1,2,3,1,3,5,"Scenario A"  
12 484,1,1,3,3,3,1,2,1,2,2,3,2,2,5,"Scenario B"  
13 484,1,2,3,2,1,1,4,2,1,2,3,4,5,3,"Scenario B"  
14 484,2,2,1,2,3,4,2,1,1,3,1,1,4,5,"Scenario A"  
15 484,1,2,1,1,3,2,1,2,1,1,2,4,3,1,"Scenario B"  
16 484,1,2,2,2,2,3,2,2,2,3,1,4,5,1,"Scenario B"  
17 484,2,1,2,1,2,1,4,1,1,1,3,2,5,2,"Scenario B"  
18 484,2,1,1,3,1,2,1,1,2,3,2,4,3,4,"Scenario A"  
19 484,1,1,3,3,1,5,2,2,2,2,1,3,1,3,"Scenario A"  
20 484,1,1,2,2,3,3,3,2,2,3,1,2,4,5,"Scenario A"  
21 484,1,2,2,3,1,5,4,2,1,3,2,4,2,5,"Scenario B"  
22 291,2,1,2,2,3,2,1,1,2,3,2,1,5,4,"Scenario A"  
23 291,1,2,2,3,2,1,5,2,1,1,1,4,3,3,"Scenario B"  
24 291,2,2,1,1,2,4,5,1,2,2,2,3,1,1,"Scenario A"  
25 291,1,1,3,3,1,4,1,2,2,1,2,4,3,2,"Scenario B"  
26 291,2,1,2,1,4,2,3,1,1,3,3,1,5,3,"Scenario B"  
27 291,2,2,3,1,1,1,1,1,1,1,1,3,3,3,4,"Scenario A"  
28 291,1,2,1,2,3,2,4,2,1,2,2,2,5,3,"Scenario A"  
29 291,2,2,3,3,4,3,5,2,1,2,1,3,5,2,"Scenario A"  
30 291,1,2,1,1,2,4,5,2,1,3,3,4,2,4,"Scenario B"  
31 291,1,1,2,2,2,1,1,2,2,3,1,1,1,2,"Scenario A"  
32 476,1,2,2,2,4,3,2,1,1,1,3,3,4,3,"Scenario B"  
33 476,2,1,3,1,2,5,4,1,2,1,3,4,2,1,"Scenario A"  
34 476,1,1,1,3,1,4,5,2,2,2,2,2,3,5,"Scenario A"  
35 476,2,1,2,2,1,4,1,1,2,2,1,3,1,2,"Scenario B"  
36 476,1,1,3,2,2,2,3,2,2,3,3,1,2,4,"Scenario B"  
37 476,2,1,1,1,4,1,2,1,2,3,2,2,5,3,"Scenario B"  
38 476,2,1,1,2,1,4,4,1,2,3,1,3,3,5,"Scenario A"  
39 476,2,2,2,3,3,5,4,1,2,2,3,4,4,1,"Scenario A"  
40 476,1,1,2,1,4,3,5,2,1,1,2,3,5,1,"Scenario A"  
41 476,1,1,3,1,1,1,2,2,2,3,3,2,4,1,"Scenario A"  
42 244,2,1,2,3,1,3,1,1,2,1,1,1,2,2,"Scenario A"  
43 244,1,1,2,1,2,2,3,2,2,3,2,4,1,2,"Scenario B"  
44 244,2,1,3,2,3,5,5,1,2,1,3,4,4,4,"Scenario A"  
45 244,1,2,3,3,1,4,3,2,1,1,1,2,1,4,"Scenario A"  
46 244,1,1,2,1,4,5,5,2,2,1,2,3,4,1,"Scenario B"  
47 244,2,1,2,3,1,1,3,1,2,2,1,2,3,1,"Scenario B"  
48 244,1,2,1,2,1,3,4,2,1,3,3,3,5,1,"Scenario B"  
49 244,2,2,3,2,1,1,5,1,1,2,3,4,2,2,"Scenario B"  
50 244,2,2,3,1,2,4,2,1,1,1,2,2,2,5,"Scenario A"  
51 244,2,2,1,1,3,3,4,1,1,2,3,1,3,5,"Scenario A"  
52 477,1,1,3,3,3,1,2,1,2,2,3,2,2,5,"Scenario A"  
53 477,1,2,3,2,1,1,4,2,1,2,3,4,5,3,"Scenario B"  
54 477,2,2,1,2,3,4,2,1,1,3,1,1,4,5,"Scenario A"  
55 477,1,2,1,1,3,2,1,2,1,1,2,4,3,1,"Scenario A"  
56 477,1,2,2,2,2,3,2,2,2,3,1,4,5,1,"Scenario B"  
57 477,2,1,2,1,2,1,4,1,1,1,3,2,5,2,"Scenario B"  
58 477,2,1,1,3,1,2,1,1,2,3,2,4,3,4,"Scenario A"  
59 477,1,1,3,3,1,5,2,2,2,2,1,3,1,3,"Scenario A"  
60

1  
2  
3 477,1,1,2,2,3,3,3,2,2,3,1,2,4,5,"Scenario A"  
4 477,1,2,2,3,1,5,4,2,1,3,2,4,2,5,"Scenario A"  
5 245,2,1,2,2,3,2,1,1,2,3,2,1,5,4,"Scenario B"  
6 245,1,2,2,3,2,1,5,2,1,1,1,4,3,3,"Scenario A"  
7 245,2,2,1,1,2,4,5,1,2,2,2,3,1,1,"Scenario A"  
8 245,1,1,3,3,1,4,1,2,2,1,2,4,3,2,"Scenario B"  
9 245,2,1,2,1,4,2,3,1,1,3,3,1,5,3,"Scenario A"  
10 245,2,2,3,1,1,1,1,1,1,1,3,3,3,4,"Scenario A"  
11 245,1,2,1,2,3,2,4,2,1,2,2,2,5,3,"Scenario A"  
12 245,2,2,3,3,4,3,5,2,1,2,1,3,5,2,"Scenario A"  
13 245,1,2,1,1,2,4,5,2,1,3,3,4,2,4,"Scenario A"  
14 245,1,1,2,2,2,1,1,2,2,3,1,1,1,2,"Scenario B"  
15 481,1,2,2,2,4,3,2,1,1,1,3,3,4,3,"Scenario A"  
16 481,2,1,3,1,2,5,4,1,2,1,3,4,2,1,"Scenario B"  
17 481,1,1,1,3,1,4,5,2,2,2,2,2,3,5,"Scenario B"  
18 481,2,1,2,2,1,4,1,1,2,2,1,3,1,2,"Scenario A"  
19 481,1,1,3,2,2,2,3,2,2,3,3,1,2,4,"Scenario B"  
20 481,2,1,1,1,4,1,2,1,2,3,2,2,5,3,"Scenario B"  
21 481,2,1,1,2,1,4,4,1,2,3,1,3,3,5,"Scenario B"  
22 481,2,2,2,3,3,5,4,1,2,2,3,4,4,1,"Scenario B"  
23 481,1,1,2,1,4,3,5,2,1,1,2,3,5,1,"Scenario A"  
24 481,1,1,3,1,1,1,2,2,2,3,3,2,4,1,"Scenario A"  
25 407,2,1,2,3,1,3,1,1,2,1,1,1,2,2,"Scenario A"  
26 407,1,1,2,1,2,2,3,2,2,3,2,4,1,2,"Scenario B"  
27 407,2,1,3,2,3,5,5,1,2,1,3,4,4,4,"Scenario A"  
28 407,1,2,3,3,1,4,3,2,1,1,1,2,1,4,"Scenario A"  
29 407,1,1,2,1,4,5,5,2,2,1,2,3,4,1,"Scenario B"  
30 407,2,1,2,3,1,1,3,1,2,2,1,2,3,1,"Scenario B"  
31 407,1,2,1,2,1,3,4,2,1,3,3,3,5,1,"Scenario A"  
32 407,2,2,3,2,1,1,5,1,1,2,3,4,2,2,"Scenario A"  
33 407,2,2,3,1,2,4,2,1,1,1,2,2,2,5,"Scenario A"  
34 407,2,2,1,1,3,3,4,1,1,2,3,1,3,5,"Scenario A"  
35 486,1,1,3,3,3,1,2,1,2,2,3,2,2,5,"Scenario A"  
36 486,1,2,3,2,1,1,4,2,1,2,3,4,5,3,"Scenario A"  
37 486,2,2,1,2,3,4,2,1,1,3,1,1,4,5,"Scenario B"  
38 486,1,2,1,1,3,2,1,2,1,1,2,4,3,1,"Scenario B"  
39 486,1,2,2,2,2,3,2,2,2,3,1,4,5,1,"Scenario A"  
40 486,2,1,2,1,2,1,4,1,1,1,3,2,5,2,"Scenario A"  
41 486,2,1,1,3,1,2,1,1,2,3,2,4,3,4,"Scenario A"  
42 486,1,1,3,3,1,5,2,2,2,2,1,3,1,3,"Scenario A"  
43 486,1,1,2,2,3,3,3,2,2,3,1,2,4,5,"Scenario A"  
44 486,1,2,2,3,1,5,4,2,1,3,2,4,2,5,"Scenario B"  
45 312,2,1,2,2,3,2,1,1,2,3,2,1,5,4,"Scenario A"  
46 312,1,2,2,3,2,1,5,2,1,1,1,4,3,3,"Scenario B"  
47 312,2,2,1,1,2,4,5,1,2,2,2,3,1,1,"Scenario B"  
48 312,1,1,3,3,1,4,1,2,2,1,2,4,3,2,"Scenario A"  
49 312,2,1,2,1,4,2,3,1,1,3,3,1,5,3,"Scenario B"  
50 312,2,2,3,1,1,1,1,1,1,1,3,3,3,4,"Scenario A"  
51 312,1,2,1,2,3,2,4,2,1,2,2,2,5,3,"Scenario B"  
52 312,2,2,3,3,4,3,5,2,1,2,1,3,5,2,"Scenario B"  
53 312,1,2,1,1,2,4,5,2,1,3,3,4,2,4,"Scenario B"  
54 312,1,1,2,2,2,1,1,2,2,3,1,1,1,2,"Scenario A"  
55 310,1,2,2,2,4,3,2,1,1,1,3,3,4,3,"Scenario A"  
56 310,2,1,3,1,2,5,4,1,2,1,3,4,2,1,"Scenario B"  
57 310,1,1,1,3,1,4,5,2,2,2,2,2,3,5,"Scenario B"  
58 310,2,1,2,2,1,4,1,1,2,2,1,3,1,2,"Scenario B"  
59 310,1,1,3,2,2,2,3,2,2,3,3,1,2,4,"Scenario A"  
60

1  
2  
3 310,2,1,1,1,4,1,2,1,2,3,2,2,5,3,"Scenario A"  
4 310,2,1,1,2,1,4,4,1,2,3,1,3,3,5,"Scenario A"  
5 310,2,2,2,3,3,5,4,1,2,2,3,4,4,1,"Scenario B"  
6 310,1,1,2,1,4,3,5,2,1,1,2,3,5,1,"Scenario B"  
7 310,1,1,3,1,1,1,2,2,2,3,3,2,4,1,"Scenario B"  
8 487,2,1,2,3,1,3,1,1,2,1,1,1,2,2,"Scenario B"  
9 487,1,1,2,1,2,2,3,2,2,3,2,4,1,2,"Scenario B"  
10 487,2,1,3,2,3,5,5,1,2,1,3,4,4,4,"Scenario B"  
11 487,1,2,3,3,1,4,3,2,1,1,1,2,1,4,"Scenario A"  
12 487,1,1,2,1,4,5,5,2,2,1,2,3,4,1,"Scenario B"  
13 487,2,1,2,3,1,1,3,1,2,2,1,2,3,1,"Scenario A"  
14 487,1,2,1,2,1,3,4,2,1,3,3,3,5,1,"Scenario B"  
15 487,2,2,3,2,1,1,5,1,1,2,3,4,2,2,"Scenario A"  
16 487,2,2,3,1,2,4,2,1,1,1,2,2,2,5,"Scenario A"  
17 487,2,2,1,1,3,3,4,1,1,2,3,1,3,5,"Scenario A"  
18 304,1,1,3,3,3,1,2,1,2,2,3,2,2,5,"Scenario A"  
19 304,1,2,3,2,1,1,4,2,1,2,3,4,5,3,"Scenario A"  
20 304,2,2,1,2,3,4,2,1,1,3,1,1,4,5,"Scenario B"  
21 304,1,2,1,1,3,2,1,2,1,1,2,4,3,1,"Scenario B"  
22 304,1,2,2,2,2,3,2,2,2,3,1,4,5,1,"Scenario A"  
23 304,2,1,2,1,2,1,4,1,1,1,3,2,5,2,"Scenario A"  
24 304,2,1,1,3,1,2,1,1,2,3,2,4,3,4,"Scenario B"  
25 304,1,1,3,3,1,5,2,2,2,2,1,3,1,3,"Scenario A"  
26 304,1,1,2,2,3,3,3,2,2,3,1,2,4,5,"Scenario B"  
27 304,1,2,2,3,1,5,4,2,1,3,2,4,2,5,"Scenario A"  
28 406,2,1,2,2,3,2,1,1,2,3,2,1,5,4,"Scenario A"  
29 406,1,2,2,3,2,1,5,2,1,1,1,4,3,3,"Scenario B"  
30 406,2,2,1,1,2,4,5,1,2,2,2,3,1,1,"Scenario A"  
31 406,1,1,3,3,1,4,1,2,2,1,2,4,3,2,"Scenario A"  
32 406,2,1,2,1,4,2,3,1,1,3,3,1,5,3,"Scenario B"  
33 406,2,2,3,1,1,1,1,1,1,1,3,3,3,4,"Scenario A"  
34 406,1,2,1,2,3,2,4,2,1,2,2,2,5,3,"Scenario B"  
35 406,2,2,3,3,4,3,5,2,1,2,1,3,5,2,"Scenario A"  
36 406,1,2,1,1,2,4,5,2,1,3,3,4,2,4,"Scenario A"  
37 406,1,1,2,2,2,1,1,2,2,3,1,1,1,2,"Scenario A"  
38 377,1,2,2,2,4,3,2,1,1,1,3,3,4,3,"Scenario A"  
39 377,2,1,3,1,2,5,4,1,2,1,3,4,2,1,"Scenario B"  
40 377,1,1,1,3,1,4,5,2,2,2,2,2,3,5,"Scenario B"  
41 377,2,1,2,2,1,4,1,1,2,2,1,3,1,2,"Scenario A"  
42 377,1,1,3,2,2,2,3,2,2,3,3,1,2,4,"Scenario B"  
43 377,2,1,1,1,4,1,2,1,2,3,2,2,5,3,"Scenario B"  
44 377,2,1,1,2,1,4,4,1,2,3,1,3,3,5,"Scenario A"  
45 377,2,2,2,3,3,5,4,1,2,2,3,4,4,1,"Scenario B"  
46 377,1,1,2,1,4,3,5,2,1,1,2,3,5,1,"Scenario B"  
47 377,1,1,3,1,1,1,2,2,2,3,3,2,4,1,"Scenario B"  
48 311,2,1,2,3,1,3,1,1,2,1,1,1,2,2,"Scenario A"  
49 311,1,1,2,1,2,2,3,2,2,3,2,4,1,2,"Scenario A"  
50 311,2,1,3,2,3,5,5,1,2,1,3,4,4,4,"Scenario B"  
51 311,1,2,3,3,1,4,3,2,1,1,1,2,1,4,"Scenario A"  
52 311,1,1,2,1,4,5,5,2,2,1,2,3,4,1,"Scenario B"  
53 311,2,1,2,3,1,1,3,1,2,2,1,2,3,1,"Scenario B"  
54 311,1,2,1,2,1,3,4,2,1,3,3,3,5,1,"Scenario B"  
55 311,2,2,3,2,1,1,5,1,1,2,3,4,2,2,"Scenario A"  
56 311,2,2,3,1,2,4,2,1,1,1,2,2,2,5,"Scenario A"  
57 311,2,2,1,1,3,3,4,1,1,2,3,1,3,5,"Scenario B"  
58 309,1,1,3,3,3,1,2,1,2,2,3,2,2,5,"Scenario A"  
59 309,1,2,3,2,1,1,4,2,1,2,3,4,5,3,"Scenario B"  
60

1  
2  
3 309,2,2,1,2,3,4,2,1,1,3,1,1,4,5,"Scenario A"  
4 309,1,2,1,1,3,2,1,2,1,1,2,4,3,1,"Scenario B"  
5 309,1,2,2,2,2,3,2,2,2,3,1,4,5,1,"Scenario B"  
6 309,2,1,2,1,2,1,4,1,1,1,3,2,5,2,"Scenario B"  
7 309,2,1,1,3,1,2,1,1,2,3,2,4,3,4,"Scenario A"  
8 309,1,1,3,3,1,5,2,2,2,2,1,3,1,3,"Scenario A"  
9 309,1,1,2,2,3,3,3,2,2,3,1,2,4,5,"Scenario A"  
10 309,1,2,2,3,1,5,4,2,1,3,2,4,2,5,"Scenario A"  
11 488,2,1,2,2,3,2,1,1,2,3,2,1,5,4,"Scenario B"  
12 488,1,2,2,3,2,1,5,2,1,1,1,4,3,3,"Scenario A"  
13 488,2,2,1,1,2,4,5,1,2,2,2,3,1,1,"Scenario A"  
14 488,1,1,3,3,1,4,1,2,2,1,2,4,3,2,"Scenario B"  
15 488,2,1,2,1,4,2,3,1,1,3,3,1,5,3,"Scenario B"  
16 488,2,2,3,1,1,1,1,1,1,1,3,3,3,4,"Scenario B"  
17 488,1,2,1,2,3,2,4,2,1,2,2,2,5,3,"Scenario B"  
18 488,2,2,3,3,4,3,5,2,1,2,1,3,5,2,"Scenario A"  
19 488,1,2,1,1,2,4,5,2,1,3,3,4,2,4,"Scenario A"  
20 488,1,1,2,2,2,1,1,2,2,3,1,1,1,2,"Scenario A"  
21 489,1,2,2,2,4,3,2,1,1,1,3,3,4,3,"Scenario A"  
22 489,2,1,3,1,2,5,4,1,2,1,3,4,2,1,"Scenario A"  
23 489,1,1,1,3,1,4,5,2,2,2,2,2,3,5,"Scenario B"  
24 489,2,1,2,2,1,4,1,1,2,2,1,3,1,2,"Scenario B"  
25 489,1,1,3,2,2,2,3,2,2,3,3,1,2,4,"Scenario A"  
26 489,2,1,1,1,4,1,2,1,2,3,2,2,5,3,"Scenario A"  
27 489,2,1,1,2,1,4,4,1,2,3,1,3,3,5,"Scenario A"  
28 489,2,2,2,3,3,5,4,1,2,2,3,4,4,1,"Scenario B"  
29 489,1,1,2,1,4,3,5,2,1,1,2,3,5,1,"Scenario B"  
30 489,1,1,3,1,1,1,2,2,2,3,3,2,4,1,"Scenario B"  
31 490,2,1,2,3,1,3,1,1,2,1,1,1,2,2,"Scenario A"  
32 490,1,1,2,1,2,2,3,2,2,3,2,4,1,2,"Scenario B"  
33 490,2,1,3,2,3,5,5,1,2,1,3,4,4,4,"Scenario B"  
34 490,1,2,3,3,1,4,3,2,1,1,1,2,1,4,"Scenario A"  
35 490,1,1,2,1,4,5,5,2,2,1,2,3,4,1,"Scenario B"  
36 490,2,1,2,3,1,1,3,1,2,2,1,2,3,1,"Scenario B"  
37 490,1,2,1,2,1,3,4,2,1,3,3,3,5,1,"Scenario B"  
38 490,2,2,3,2,1,1,5,1,1,2,3,4,2,2,"Scenario A"  
39 490,2,2,3,1,2,4,2,1,1,1,2,2,2,5,"Scenario B"  
40 490,2,2,1,1,3,3,4,1,1,2,3,1,3,5,"Scenario A"  
41 493,1,1,3,3,3,1,2,1,2,2,3,2,2,5,"Scenario A"  
42 493,1,2,3,2,1,1,4,2,1,2,3,4,5,3,"Scenario B"  
43 493,2,2,1,2,3,4,2,1,1,3,1,1,4,5,"Scenario A"  
44 493,1,2,1,1,3,2,1,2,1,1,2,4,3,1,"Scenario B"  
45 493,1,2,2,2,2,3,2,2,2,3,1,4,5,1,"Scenario A"  
46 493,2,1,2,1,2,1,4,1,1,1,3,2,5,2,"Scenario A"  
47 493,2,1,1,3,1,2,1,1,2,3,2,4,3,4,"Scenario A"  
48 493,1,1,3,3,1,5,2,2,2,2,1,3,1,3,"Scenario B"  
49 493,1,1,2,2,3,3,3,2,2,3,1,2,4,5,"Scenario A"  
50 493,1,2,2,3,1,5,4,2,1,3,2,4,2,5,"Scenario A"  
51 494,2,1,2,2,3,2,1,1,2,3,2,1,5,4,"Scenario A"  
52 494,1,2,2,3,2,1,5,2,1,1,1,4,3,3,"Scenario B"  
53 494,2,2,1,1,2,4,5,1,2,2,2,3,1,1,"Scenario B"  
54 494,1,1,3,3,1,4,1,2,2,1,2,4,3,2,"Scenario A"  
55 494,2,1,2,1,4,2,3,1,1,3,3,1,5,3,"Scenario B"  
56 494,2,2,3,1,1,1,1,1,1,1,3,3,3,4,"Scenario A"  
57 494,1,2,1,2,3,2,4,2,1,2,2,2,5,3,"Scenario A"  
58 494,2,2,3,3,4,3,5,2,1,2,1,3,5,2,"Scenario B"  
59 494,1,2,1,1,2,4,5,2,1,3,3,4,2,4,"Scenario A"  
60

1  
2  
3 494,1,1,2,2,2,1,1,2,2,3,1,1,1,2,"Scenario A"  
4 235,1,2,2,2,4,3,2,1,1,1,3,3,4,3,"Scenario A"  
5 235,2,1,3,1,2,5,4,1,2,1,3,4,2,1,"Scenario B"  
6 235,1,1,1,3,1,4,5,2,2,2,2,2,3,5,"Scenario A"  
7 235,2,1,2,2,1,4,1,1,2,2,1,3,1,2,"Scenario A"  
8 235,1,1,3,2,2,2,3,2,2,3,3,1,2,4,"Scenario A"  
9 235,2,1,1,1,4,1,2,1,2,3,2,2,5,3,"Scenario B"  
10 235,2,1,1,2,1,4,4,1,2,3,1,3,3,5,"Scenario B"  
11 235,2,2,2,3,3,5,4,1,2,2,3,4,4,1,"Scenario B"  
12 235,1,1,2,1,4,3,5,2,1,1,2,3,5,1,"Scenario B"  
13 235,1,1,3,1,1,1,2,2,2,3,3,2,4,1,"Scenario B"  
14 345,2,1,2,3,1,3,1,1,2,1,1,1,2,2,"Scenario A"  
15 345,1,1,2,1,2,2,3,2,2,3,2,4,1,2,"Scenario B"  
16 345,2,1,3,2,3,5,5,1,2,1,3,4,4,4,"Scenario B"  
17 345,1,2,3,3,1,4,3,2,1,1,1,2,1,4,"Scenario A"  
18 345,1,1,2,1,4,5,5,2,2,1,2,3,4,1,"Scenario B"  
19 345,2,1,2,3,1,1,3,1,2,2,1,2,3,1,"Scenario B"  
20 345,1,2,1,2,1,3,4,2,1,3,3,3,5,1,"Scenario B"  
21 345,2,2,3,2,1,1,5,1,1,2,3,4,2,2,"Scenario B"  
22 345,2,2,3,1,2,4,2,1,1,1,2,2,2,5,"Scenario A"  
23 345,2,2,1,1,3,3,4,1,1,2,3,1,3,5,"Scenario A"  
24 234,1,1,3,3,3,1,2,1,2,2,3,2,2,5,"Scenario A"  
25 234,1,2,3,2,1,1,4,2,1,2,3,4,5,3,"Scenario A"  
26 234,2,2,1,2,3,4,2,1,1,3,1,1,4,5,"Scenario A"  
27 234,1,2,1,1,3,2,1,2,1,1,2,4,3,1,"Scenario A"  
28 234,1,2,2,2,2,3,2,2,2,3,1,4,5,1,"Scenario B"  
29 234,2,1,2,1,2,1,4,1,1,1,3,2,5,2,"Scenario B"  
30 234,2,1,1,3,1,2,1,1,2,3,2,4,3,4,"Scenario A"  
31 234,1,1,3,3,1,5,2,2,2,2,1,3,1,3,"Scenario A"  
32 234,1,1,2,2,3,3,3,2,2,3,1,2,4,5,"Scenario B"  
33 234,1,2,2,3,1,5,4,2,1,3,2,4,2,5,"Scenario A"  
34 236,2,1,2,2,3,2,1,1,2,3,2,1,5,4,"Scenario B"  
35 236,1,2,2,3,2,1,5,2,1,1,1,4,3,3,"Scenario B"  
36 236,2,2,1,1,2,4,5,1,2,2,2,3,1,1,"Scenario B"  
37 236,1,1,3,3,1,4,1,2,2,1,2,4,3,2,"Scenario A"  
38 236,2,1,2,1,4,2,3,1,1,3,3,1,5,3,"Scenario B"  
39 236,2,2,3,1,1,1,1,1,1,1,3,3,3,4,"Scenario A"  
40 236,1,2,1,2,3,2,4,2,1,2,2,2,5,3,"Scenario B"  
41 236,2,2,3,3,4,3,5,2,1,2,1,3,5,2,"Scenario B"  
42 236,1,2,1,1,2,4,5,2,1,3,3,4,2,4,"Scenario B"  
43 236,1,1,2,2,2,1,1,2,2,3,1,1,1,2,"Scenario A"  
44 237,1,2,2,2,4,3,2,1,1,1,3,3,4,3,"Scenario B"  
45 237,2,1,3,1,2,5,4,1,2,1,3,4,2,1,"Scenario A"  
46 237,1,1,1,3,1,4,5,2,2,2,2,2,3,5,"Scenario A"  
47 237,2,1,2,2,1,4,1,1,2,2,1,3,1,2,"Scenario A"  
48 237,1,1,3,2,2,2,3,2,2,3,3,1,2,4,"Scenario B"  
49 237,2,1,1,1,4,1,2,1,2,3,2,2,5,3,"Scenario B"  
50 237,2,1,1,2,1,4,4,1,2,3,1,3,3,5,"Scenario A"  
51 237,2,2,2,3,3,5,4,1,2,2,3,4,4,1,"Scenario A"  
52 237,1,1,2,1,4,3,5,2,1,1,2,3,5,1,"Scenario B"  
53 237,1,1,3,1,1,1,2,2,2,3,3,2,4,1,"Scenario A"  
54 349,2,1,2,3,1,3,1,1,2,1,1,1,2,2,"Scenario A"  
55 349,1,1,2,1,2,2,3,2,2,3,2,4,1,2,"Scenario B"  
56 349,2,1,3,2,3,5,5,1,2,1,3,4,4,4,"Scenario B"  
57 349,1,2,3,3,1,4,3,2,1,1,1,2,1,4,"Scenario A"  
58 349,1,1,2,1,4,5,5,2,2,1,2,3,4,1,"Scenario B"  
59 349,2,1,2,3,1,1,3,1,2,2,1,2,3,1,"Scenario A"  
60

1  
2  
3 349,1,2,1,2,1,3,4,2,1,3,3,3,5,1,"Scenario B"  
4 349,2,2,3,2,1,1,5,1,1,2,3,4,2,2,"Scenario B"  
5 349,2,2,3,1,2,4,2,1,1,1,2,2,2,5,"Scenario A"  
6 349,2,2,1,1,3,3,4,1,1,2,3,1,3,5,"Scenario A"  
7 344,1,1,3,3,3,1,2,1,2,2,3,2,2,5,"Scenario B"  
8 344,1,2,3,2,1,1,4,2,1,2,3,4,5,3,"Scenario B"  
9 344,2,2,1,2,3,4,2,1,1,3,1,1,4,5,"Scenario A"  
10 344,1,2,1,1,3,2,1,2,1,1,2,4,3,1,"Scenario B"  
11 344,1,2,2,2,2,3,2,2,2,3,1,4,5,1,"Scenario B"  
12 344,2,1,2,1,2,1,4,1,1,1,3,2,5,2,"Scenario A"  
13 344,2,1,1,3,1,2,1,1,2,3,2,4,3,4,"Scenario A"  
14 344,1,1,3,3,1,5,2,2,2,2,1,3,1,3,"Scenario B"  
15 344,1,1,2,2,3,3,3,2,2,3,1,2,4,5,"Scenario B"  
16 344,1,2,2,3,1,5,4,2,1,3,2,4,2,5,"Scenario B"  
17 352,2,1,2,2,3,2,1,1,2,3,2,1,5,4,"Scenario A"  
18 352,1,2,2,3,2,1,5,2,1,1,1,4,3,3,"Scenario B"  
19 352,2,2,1,1,2,4,5,1,2,2,2,3,1,1,"Scenario B"  
20 352,1,1,3,3,1,4,1,2,2,1,2,4,3,2,"Scenario A"  
21 352,2,1,2,1,4,2,3,1,1,3,3,1,5,3,"Scenario A"  
22 352,2,2,3,1,1,1,1,1,1,1,3,3,3,4,"Scenario B"  
23 352,1,2,1,2,3,2,4,2,1,2,2,2,5,3,"Scenario B"  
24 352,2,2,3,3,4,3,5,2,1,2,1,3,5,2,"Scenario A"  
25 352,1,2,1,1,2,4,5,2,1,3,3,4,2,4,"Scenario B"  
26 352,1,1,2,2,2,1,1,2,2,3,1,1,1,2,"Scenario B"  
27 346,1,2,2,2,4,3,2,1,1,1,3,3,4,3,"Scenario A"  
28 346,2,1,3,1,2,5,4,1,2,1,3,4,2,1,"Scenario A"  
29 346,1,1,1,3,1,4,5,2,2,2,2,2,3,5,"Scenario B"  
30 346,2,1,2,2,1,4,1,1,2,2,1,3,1,2,"Scenario A"  
31 346,1,1,3,2,2,2,3,2,2,3,3,1,2,4,"Scenario B"  
32 346,2,1,1,1,4,1,2,1,2,3,2,2,5,3,"Scenario A"  
33 346,2,1,1,2,1,4,4,1,2,3,1,3,3,5,"Scenario A"  
34 346,2,2,2,3,3,5,4,1,2,2,3,4,4,1,"Scenario A"  
35 346,1,1,2,1,4,3,5,2,1,1,2,3,5,1,"Scenario B"  
36 346,1,1,3,1,1,1,2,2,2,3,3,2,4,1,"Scenario B"  
37 350,2,1,2,3,1,3,1,1,2,1,1,1,2,2,"Scenario A"  
38 350,1,1,2,1,2,2,3,2,2,3,2,4,1,2,"Scenario B"  
39 350,2,1,3,2,3,5,5,1,2,1,3,4,4,4,"Scenario A"  
40 350,1,2,3,3,1,4,3,2,1,1,1,2,1,4,"Scenario B"  
41 350,1,1,2,1,4,5,5,2,2,1,2,3,4,1,"Scenario B"  
42 350,2,1,2,3,1,1,3,1,2,2,1,2,3,1,"Scenario A"  
43 350,1,2,1,2,1,3,4,2,1,3,3,3,5,1,"Scenario B"  
44 350,2,2,3,2,1,1,5,1,1,2,3,4,2,2,"Scenario A"  
45 350,2,2,3,1,2,4,2,1,1,1,2,2,2,5,"Scenario A"  
46 350,2,2,1,1,3,3,4,1,1,2,3,1,3,5,"Scenario A"  
47 353,1,1,3,3,3,1,2,1,2,2,3,2,2,5,"Scenario A"  
48 353,1,2,3,2,1,1,4,2,1,2,3,4,5,3,"Scenario A"  
49 353,2,2,1,2,3,4,2,1,1,3,1,1,4,5,"Scenario B"  
50 353,1,2,1,1,3,2,1,2,1,1,2,4,3,1,"Scenario B"  
51 353,1,2,2,2,2,3,2,2,2,3,1,4,5,1,"Scenario B"  
52 353,2,1,2,1,2,1,4,1,1,1,3,2,5,2,"Scenario A"  
53 353,2,1,1,3,1,2,1,1,2,3,2,4,3,4,"Scenario A"  
54 353,1,1,3,3,1,5,2,2,2,2,1,3,1,3,"Scenario A"  
55 353,1,1,2,2,3,3,3,2,2,3,1,2,4,5,"Scenario A"  
56 353,1,2,2,3,1,5,4,2,1,3,2,4,2,5,"Scenario B"  
57 440,2,1,2,2,3,2,1,1,2,3,2,1,5,4,"Scenario A"  
58 440,1,2,2,3,2,1,5,2,1,1,1,4,3,3,"Scenario B"  
59 440,2,2,1,1,2,4,5,1,2,2,2,3,1,1,"Scenario B"  
60

1  
2  
3 440,1,1,3,3,1,4,1,2,2,1,2,4,3,2,"Scenario A"  
4 440,2,1,2,1,4,2,3,1,1,3,3,1,5,3,"Scenario A"  
5 440,2,2,3,1,1,1,1,1,1,1,3,3,3,4,"Scenario A"  
6 440,1,2,1,2,3,2,4,2,1,2,2,2,5,3,"Scenario B"  
7 440,2,2,3,3,4,3,5,2,1,2,1,3,5,2,"Scenario A"  
8 440,1,2,1,1,2,4,5,2,1,3,3,4,2,4,"Scenario B"  
9 440,1,1,2,2,2,1,1,2,2,3,1,1,1,2,"Scenario B"  
10 351,1,2,2,2,4,3,2,1,1,1,3,3,4,3,"Scenario A"  
11 351,2,1,3,1,2,5,4,1,2,1,3,4,2,1,"Scenario A"  
12 351,1,1,1,3,1,4,5,2,2,2,2,2,3,5,"Scenario B"  
13 351,2,1,2,2,1,4,1,1,2,2,1,3,1,2,"Scenario A"  
14 351,1,1,3,2,2,3,2,2,3,3,1,2,4,"Scenario B"  
15 351,2,1,1,1,4,1,2,1,2,3,2,2,5,3,"Scenario A"  
16 351,2,1,1,2,1,4,4,1,2,3,1,3,3,5,"Scenario A"  
17 351,2,2,2,3,3,5,4,1,2,2,3,4,4,1,"Scenario A"  
18 351,1,1,2,1,4,3,5,2,1,1,2,3,5,1,"Scenario B"  
19 351,1,1,3,1,1,1,2,2,2,3,3,2,4,1,"Scenario B"  
20 348,2,1,2,3,1,3,1,1,2,1,1,1,2,2,"Scenario A"  
21 348,1,1,2,1,2,2,3,2,2,3,2,4,1,2,"Scenario B"  
22 348,2,1,3,2,3,5,5,1,2,1,3,4,4,4,"Scenario A"  
23 348,1,2,3,3,1,4,3,2,1,1,1,2,1,4,"Scenario B"  
24 348,1,1,2,1,4,5,5,2,2,1,2,3,4,1,"Scenario B"  
25 348,2,1,2,3,1,1,3,1,2,2,1,2,3,1,"Scenario A"  
26 348,1,2,1,2,1,3,4,2,1,3,3,3,5,1,"Scenario B"  
27 348,2,2,3,2,1,1,5,1,1,2,3,4,2,2,"Scenario A"  
28 348,2,2,3,1,2,4,2,1,1,1,2,2,2,5,"Scenario A"  
29 348,2,2,1,1,3,3,4,1,1,2,3,1,3,5,"Scenario A"  
30 347,1,1,3,3,3,1,2,1,2,2,3,2,2,5,"Scenario B"  
31 347,1,2,3,2,1,1,4,2,1,2,3,4,5,3,"Scenario B"  
32 347,2,2,1,2,3,4,2,1,1,3,1,1,4,5,"Scenario A"  
33 347,1,2,1,1,3,2,1,2,1,1,2,4,3,1,"Scenario B"  
34 347,1,2,2,2,2,3,2,2,2,3,1,4,5,1,"Scenario B"  
35 347,2,1,2,1,2,1,4,1,1,1,3,2,5,2,"Scenario A"  
36 347,2,1,1,3,1,2,1,1,2,3,2,4,3,4,"Scenario A"  
37 347,1,1,3,3,1,5,2,2,2,2,1,3,1,3,"Scenario B"  
38 347,1,1,2,2,3,3,3,2,2,3,1,2,4,5,"Scenario B"  
39 347,1,2,2,3,1,5,4,2,1,3,2,4,2,5,"Scenario B"  
40 34,2,1,2,2,3,2,1,1,2,3,2,1,5,4,"Scenario A"  
41 34,1,2,2,3,2,1,5,2,1,1,1,4,3,3,"Scenario A"  
42 34,2,2,1,1,2,4,5,1,2,2,2,3,1,1,"Scenario B"  
43 34,1,1,3,3,1,4,1,2,2,1,2,4,3,2,"Scenario B"  
44 34,2,1,2,1,4,2,3,1,1,3,3,1,5,3,"Scenario B"  
45 34,2,2,3,1,1,1,1,1,1,1,3,3,3,4,"Scenario A"  
46 34,1,2,1,2,3,2,4,2,1,2,2,2,5,3,"Scenario A"  
47 34,2,2,3,3,4,3,5,2,1,2,1,3,5,2,"Scenario A"  
48 34,1,2,1,1,2,4,5,2,1,3,3,4,2,4,"Scenario B"  
49 34,1,1,2,2,2,1,1,2,2,3,1,1,1,2,"Scenario B"  
50 32,1,2,2,2,4,3,2,1,1,1,3,3,4,3,"Scenario A"  
51 32,2,1,3,1,2,5,4,1,2,1,3,4,2,1,"Scenario A"  
52 32,1,1,1,3,1,4,5,2,2,2,2,2,3,5,"Scenario B"  
53 32,2,1,2,2,1,4,1,1,2,2,1,3,1,2,"Scenario B"  
54 32,1,1,3,2,2,2,3,2,2,3,3,1,2,4,"Scenario B"  
55 32,2,1,1,1,4,1,2,1,2,3,2,2,5,3,"Scenario A"  
56 32,2,1,1,2,1,4,4,1,2,3,1,3,3,5,"Scenario B"  
57 32,2,2,2,3,3,5,4,1,2,2,3,4,4,1,"Scenario A"  
58 32,1,1,2,1,4,3,5,2,1,1,2,3,5,1,"Scenario B"  
59 32,1,1,3,1,1,1,2,2,2,3,3,2,4,1,"Scenario B"  
60

1  
2  
3 37,2,1,2,3,1,3,1,1,2,1,1,1,2,2,"Scenario A"  
4 37,1,1,2,1,2,2,3,2,2,3,2,4,1,2,"Scenario B"  
5 37,2,1,3,2,3,5,5,1,2,1,3,4,4,4,"Scenario A"  
6 37,1,2,3,3,1,4,3,2,1,1,1,2,1,4,"Scenario A"  
7 37,1,1,2,1,4,5,5,2,2,1,2,3,4,1,"Scenario B"  
8 37,2,1,2,3,1,1,3,1,2,2,1,2,3,1,"Scenario B"  
9 37,1,2,1,2,1,3,4,2,1,3,3,3,5,1,"Scenario A"  
10 37,2,2,3,2,1,1,5,1,1,2,3,4,2,2,"Scenario A"  
11 37,2,2,3,1,2,4,2,1,1,1,2,2,2,5,"Scenario A"  
12 37,2,2,1,1,3,3,4,1,1,2,3,1,3,5,"Scenario A"  
13 38,1,1,3,3,3,1,2,1,2,2,3,2,2,5,"Scenario A"  
14 38,1,2,3,2,1,1,4,2,1,2,3,4,5,3,"Scenario A"  
15 38,2,2,1,2,3,4,2,1,1,3,1,1,4,5,"Scenario B"  
16 38,1,2,1,1,3,2,1,2,1,1,2,4,3,1,"Scenario B"  
17 38,1,2,2,2,2,3,2,2,2,3,1,4,5,1,"Scenario A"  
18 38,2,1,2,1,2,1,4,1,1,1,3,2,5,2,"Scenario B"  
19 38,2,1,1,3,1,2,1,1,2,3,2,4,3,4,"Scenario A"  
20 38,1,1,3,3,1,5,2,2,2,2,1,3,1,3,"Scenario A"  
21 38,1,1,2,2,3,3,3,2,2,3,1,2,4,5,"Scenario B"  
22 38,1,2,2,3,1,5,4,2,1,3,2,4,2,5,"Scenario B"  
23 33,2,1,2,2,3,2,1,1,2,3,2,1,5,4,"Scenario A"  
24 33,1,2,2,3,2,1,5,2,1,1,1,4,3,3,"Scenario A"  
25 33,2,2,1,1,2,4,5,1,2,2,2,3,1,1,"Scenario B"  
26 33,1,1,3,3,1,4,1,2,2,1,2,4,3,2,"Scenario B"  
27 33,2,1,2,1,4,2,3,1,1,3,3,1,5,3,"Scenario A"  
28 33,2,2,3,1,1,1,1,1,1,1,3,3,3,4,"Scenario A"  
29 33,1,2,1,2,3,2,4,2,1,2,2,2,5,3,"Scenario A"  
30 33,2,2,3,3,4,3,5,2,1,2,1,3,5,2,"Scenario B"  
31 33,1,2,1,1,2,4,5,2,1,3,3,4,2,4,"Scenario B"  
32 33,1,1,2,2,2,1,1,2,2,3,1,1,1,2,"Scenario A"  
33 454,1,2,2,2,4,3,2,1,1,1,3,3,4,3,"Scenario A"  
34 454,2,1,3,1,2,5,4,1,2,1,3,4,2,1,"Scenario A"  
35 454,1,1,1,3,1,4,5,2,2,2,2,2,3,5,"Scenario B"  
36 454,2,1,2,2,1,4,1,1,2,2,1,3,1,2,"Scenario B"  
37 454,1,1,3,2,2,2,3,2,2,3,3,1,2,4,"Scenario B"  
38 454,2,1,1,1,4,1,2,1,2,3,2,2,5,3,"Scenario A"  
39 454,2,1,1,2,1,4,4,1,2,3,1,3,3,5,"Scenario A"  
40 454,2,2,2,3,3,5,4,1,2,2,3,4,4,1,"Scenario B"  
41 454,1,1,2,1,4,3,5,2,1,1,2,3,5,1,"Scenario B"  
42 454,1,1,3,1,1,1,2,2,2,3,3,2,4,1,"Scenario A"  
43 458,2,1,2,3,1,3,1,1,2,1,1,1,2,2,"Scenario A"  
44 458,1,1,2,1,2,2,3,2,2,3,2,4,1,2,"Scenario B"  
45 458,2,1,3,2,3,5,5,1,2,1,3,4,4,4,"Scenario B"  
46 458,1,2,3,3,1,4,3,2,1,1,1,2,1,4,"Scenario A"  
47 458,1,1,2,1,4,5,5,2,2,1,2,3,4,1,"Scenario B"  
48 458,2,1,2,3,1,1,3,1,2,2,1,2,3,1,"Scenario B"  
49 458,1,2,1,2,1,3,4,2,1,3,3,3,5,1,"Scenario B"  
50 458,2,2,3,2,1,1,5,1,1,2,3,4,2,2,"Scenario B"  
51 458,2,2,3,1,2,4,2,1,1,1,2,2,2,5,"Scenario A"  
52 458,2,2,1,1,3,3,4,1,1,2,3,1,3,5,"Scenario B"  
53 39,1,1,3,3,3,1,2,1,2,2,3,2,2,5,"Scenario A"  
54 39,1,2,3,2,1,1,4,2,1,2,3,4,5,3,"Scenario B"  
55 39,2,2,1,2,3,4,2,1,1,3,1,1,4,5,"Scenario A"  
56 39,1,2,1,1,3,2,1,2,1,1,2,4,3,1,"Scenario A"  
57 39,1,2,2,2,2,3,2,2,2,3,1,4,5,1,"Scenario B"  
58 39,2,1,2,1,2,1,4,1,1,1,3,2,5,2,"Scenario A"  
59 39,2,1,1,3,1,2,1,1,2,3,2,4,3,4,"Scenario B"  
60



1  
2  
3 39,1,1,3,3,1,5,2,2,2,2,1,3,1,3,"Scenario A"  
4 39,1,1,2,2,3,3,3,2,2,3,1,2,4,5,"Scenario A"  
5 39,1,2,2,3,1,5,4,2,1,3,2,4,2,5,"Scenario A"  
6 35,2,1,2,2,3,2,1,1,2,3,2,1,5,4,"Scenario A"  
7 35,1,2,2,3,2,1,5,2,1,1,1,4,3,3,"Scenario A"  
8 35,2,2,1,1,2,4,5,1,2,2,2,3,1,1,"Scenario A"  
9 35,1,1,3,3,1,4,1,2,2,1,2,4,3,2,"Scenario B"  
10 35,2,1,2,1,4,2,3,1,1,3,3,1,5,3,"Scenario A"  
11 35,2,2,3,1,1,1,1,1,1,1,3,3,3,4,"Scenario B"  
12 35,1,2,1,2,3,2,4,2,1,2,2,2,5,3,"Scenario B"  
13 35,2,2,3,3,4,3,5,2,1,2,1,3,5,2,"Scenario A"  
14 35,1,2,1,1,2,4,5,2,1,3,3,4,2,4,"Scenario A"  
15 35,1,1,2,2,2,1,1,2,2,3,1,1,1,2,"Scenario A"  
16 36,1,2,2,2,4,3,2,1,1,1,3,3,4,3,"Scenario A"  
17 36,2,1,3,1,2,5,4,1,2,1,3,4,2,1,"Scenario A"  
18 36,1,1,1,3,1,4,5,2,2,2,2,2,3,5,"Scenario B"  
19 36,2,1,2,2,1,4,1,1,2,2,1,3,1,2,"Scenario B"  
20 36,1,1,3,2,2,2,3,2,2,3,3,1,2,4,"Scenario A"  
21 36,2,1,1,1,4,1,2,1,2,3,2,2,5,3,"Scenario A"  
22 36,2,1,1,2,1,4,4,1,2,3,1,3,3,5,"Scenario B"  
23 36,2,2,2,3,3,5,4,1,2,2,3,4,4,1,"Scenario B"  
24 36,1,1,2,1,4,3,5,2,1,1,2,3,5,1,"Scenario B"  
25 36,1,1,3,1,1,1,2,2,2,3,3,2,4,1,"Scenario A"  
26 327,2,1,2,3,1,3,1,1,2,1,1,1,2,2,"Scenario A"  
27 327,1,1,2,1,2,2,3,2,2,3,2,4,1,2,"Scenario A"  
28 327,2,1,3,2,3,5,5,1,2,1,3,4,4,4,"Scenario A"  
29 327,1,2,3,3,1,4,3,2,1,1,1,2,1,4,"Scenario B"  
30 327,1,1,2,1,4,5,5,2,2,1,2,3,4,1,"Scenario B"  
31 327,2,1,2,3,1,1,3,1,2,2,1,2,3,1,"Scenario A"  
32 327,1,2,1,2,1,3,4,2,1,3,3,3,5,1,"Scenario A"  
33 327,2,2,3,2,1,1,5,1,1,2,3,4,2,2,"Scenario B"  
34 327,2,2,3,1,2,4,2,1,1,1,2,2,2,5,"Scenario B"  
35 327,2,2,1,1,3,3,4,1,1,2,3,1,3,5,"Scenario A"  
36 328,1,1,3,3,3,1,2,1,2,2,3,2,2,5,"Scenario B"  
37 328,1,2,3,2,1,1,4,2,1,2,3,4,5,3,"Scenario B"  
38 328,2,2,1,2,3,4,2,1,1,3,1,1,4,5,"Scenario A"  
39 328,1,2,1,1,3,2,1,2,1,1,2,4,3,1,"Scenario A"  
40 328,1,2,2,2,2,3,2,2,2,3,1,4,5,1,"Scenario A"  
41 328,2,1,2,1,2,1,4,1,1,1,3,2,5,2,"Scenario B"  
42 328,2,1,1,3,1,2,1,1,2,3,2,4,3,4,"Scenario A"  
43 328,1,1,3,3,1,5,2,2,2,2,1,3,1,3,"Scenario B"  
44 328,1,1,2,2,3,3,3,2,2,3,1,2,4,5,"Scenario A"  
45 328,1,2,2,3,1,5,4,2,1,3,2,4,2,5,"Scenario A"  
46 370,2,1,2,2,3,2,1,1,2,3,2,1,5,4,"Scenario A"  
47 370,1,2,2,3,2,1,5,2,1,1,1,4,3,3,"Scenario A"  
48 370,2,2,1,1,2,4,5,1,2,2,2,3,1,1,"Scenario B"  
49 370,1,1,3,3,1,4,1,2,2,1,2,4,3,2,"Scenario B"  
50 370,2,1,2,1,4,2,3,1,1,3,3,1,5,3,"Scenario B"  
51 370,2,2,3,1,1,1,1,1,1,1,1,3,3,4,"Scenario A"  
52 370,1,2,1,2,3,2,4,2,1,2,2,2,5,3,"Scenario A"  
53 370,2,2,3,3,4,3,5,2,1,2,1,3,5,2,"Scenario B"  
54 370,1,2,1,1,2,4,5,2,1,3,3,4,2,4,"Scenario B"  
55 370,1,1,2,2,2,1,1,2,2,3,1,1,1,2,"Scenario A"  
56 368,1,2,2,2,4,3,2,1,1,1,3,3,4,3,"Scenario A"  
57 368,2,1,3,1,2,5,4,1,2,1,3,4,2,1,"Scenario A"  
58 368,1,1,1,3,1,4,5,2,2,2,2,2,3,5,"Scenario A"  
59 368,2,1,2,2,1,4,1,1,2,2,1,3,1,2,"Scenario B"  
60

1  
2  
3 368,1,1,3,2,2,2,3,2,2,3,3,1,2,4,"Scenario B"  
4 368,2,1,1,1,4,1,2,1,2,3,2,2,5,3,"Scenario A"  
5 368,2,1,1,2,1,4,4,1,2,3,1,3,3,5,"Scenario A"  
6 368,2,2,2,3,3,5,4,1,2,2,3,4,4,1,"Scenario B"  
7 368,1,1,2,1,4,3,5,2,1,1,2,3,5,1,"Scenario B"  
8 368,1,1,3,1,1,1,2,2,2,3,3,2,4,1,"Scenario B"  
9 456,2,1,2,3,1,3,1,1,2,1,1,1,2,2,"Scenario A"  
10 456,1,1,2,1,2,2,3,2,2,3,2,4,1,2,"Scenario B"  
11 456,2,1,3,2,3,5,5,1,2,1,3,4,4,4,"Scenario B"  
12 456,1,2,3,3,1,4,3,2,1,1,1,2,1,4,"Scenario B"  
13 456,1,1,2,1,4,5,5,2,2,1,2,3,4,1,"Scenario B"  
14 456,2,1,2,3,1,1,3,1,2,2,1,2,3,1,"Scenario B"  
15 456,1,2,1,2,1,3,4,2,1,3,3,3,5,1,"Scenario B"  
16 456,2,2,3,2,1,1,5,1,1,2,3,4,2,2,"Scenario B"  
17 456,2,2,3,1,2,4,2,1,1,1,2,2,2,5,"Scenario A"  
18 456,2,2,1,1,3,3,4,1,1,2,3,1,3,5,"Scenario A"  
19 438,1,1,3,3,3,1,2,1,2,2,3,2,2,5,"Scenario B"  
20 438,1,2,3,2,1,1,4,2,1,2,3,4,5,3,"Scenario B"  
21 438,2,2,1,2,3,4,2,1,1,3,1,1,4,5,"Scenario A"  
22 438,1,2,1,1,3,2,1,2,1,1,2,4,3,1,"Scenario B"  
23 438,1,2,2,2,2,3,2,2,2,3,1,4,5,1,"Scenario B"  
24 438,2,1,2,1,2,1,4,1,1,1,3,2,5,2,"Scenario B"  
25 438,2,1,1,3,1,2,1,1,2,3,2,4,3,4,"Scenario A"  
26 438,1,1,3,3,1,5,2,2,2,2,1,3,1,3,"Scenario B"  
27 438,1,1,2,2,3,3,3,2,2,3,1,2,4,5,"Scenario B"  
28 438,1,2,2,3,1,5,4,2,1,3,2,4,2,5,"Scenario A"  
29 408,2,1,2,2,3,2,1,1,2,3,2,1,5,4,"Scenario A"  
30 408,1,2,2,3,2,1,5,2,1,1,1,4,3,3,"Scenario B"  
31 408,2,2,1,1,2,4,5,1,2,2,2,3,1,1,"Scenario B"  
32 408,1,1,3,3,1,4,1,2,2,1,2,4,3,2,"Scenario A"  
33 408,2,1,2,1,4,2,3,1,1,3,3,1,5,3,"Scenario A"  
34 408,2,2,3,1,1,1,1,1,1,1,3,3,3,4,"Scenario A"  
35 408,1,2,1,2,3,2,4,2,1,2,2,2,5,3,"Scenario B"  
36 408,2,2,3,3,4,3,5,2,1,2,1,3,5,2,"Scenario A"  
37 408,1,2,1,1,2,4,5,2,1,3,3,4,2,4,"Scenario B"  
38 408,1,1,2,2,2,1,1,2,2,3,1,1,1,2,"Scenario A"  
39 357,1,2,2,2,4,3,2,1,1,1,3,3,4,3,"Scenario A"  
40 357,2,1,3,1,2,5,4,1,2,1,3,4,2,1,"Scenario A"  
41 357,1,1,1,3,1,4,5,2,2,2,2,2,3,5,"Scenario B"  
42 357,2,1,2,2,1,4,1,1,2,2,1,3,1,2,"Scenario A"  
43 357,1,1,3,2,2,2,3,2,2,3,3,1,2,4,"Scenario B"  
44 357,2,1,1,1,4,1,2,1,2,3,2,2,5,3,"Scenario A"  
45 357,2,1,1,2,1,4,4,1,2,3,1,3,3,5,"Scenario A"  
46 357,2,2,2,3,3,5,4,1,2,2,3,4,4,1,"Scenario A"  
47 357,1,1,2,1,4,3,5,2,1,1,2,3,5,1,"Scenario B"  
48 357,1,1,3,1,1,1,2,2,2,3,3,2,4,1,"Scenario B"  
49 356,2,1,2,3,1,3,1,1,2,1,1,1,2,2,"Scenario A"  
50 356,1,1,2,1,2,2,3,2,2,3,2,4,1,2,"Scenario B"  
51 356,2,1,3,2,3,5,5,1,2,1,3,4,4,4,"Scenario A"  
52 356,1,2,3,3,1,4,3,2,1,1,1,2,1,4,"Scenario B"  
53 356,1,1,2,1,4,5,5,2,2,1,2,3,4,1,"Scenario B"  
54 356,2,1,2,3,1,1,3,1,2,2,1,2,3,1,"Scenario A"  
55 356,1,2,1,2,1,3,4,2,1,3,3,3,5,1,"Scenario B"  
56 356,2,2,3,2,1,1,5,1,1,2,3,4,2,2,"Scenario A"  
57 356,2,2,3,1,2,4,2,1,1,1,2,2,2,5,"Scenario A"  
58 356,2,2,1,1,3,3,4,1,1,2,3,1,3,5,"Scenario A"  
59 441,1,1,3,3,3,1,2,1,2,2,3,2,2,5,"Scenario A"  
60

1  
2  
3 441,1,2,3,2,1,1,4,2,1,2,3,4,5,3,"Scenario B"  
4 441,2,2,1,2,3,4,2,1,1,3,1,1,4,5,"Scenario A"  
5 441,1,2,1,1,3,2,1,2,1,1,2,4,3,1,"Scenario A"  
6 441,1,2,2,2,2,3,2,2,2,3,1,4,5,1,"Scenario B"  
7 441,2,1,2,1,2,1,4,1,1,1,3,2,5,2,"Scenario B"  
8 441,2,1,1,3,1,2,1,1,2,3,2,4,3,4,"Scenario A"  
9 441,1,1,3,3,1,5,2,2,2,2,1,3,1,3,"Scenario A"  
10 441,1,1,2,2,3,3,3,2,2,3,1,2,4,5,"Scenario B"  
11 441,1,2,2,3,1,5,4,2,1,3,2,4,2,5,"Scenario A"  
12 358,2,1,2,2,3,2,1,1,2,3,2,1,5,4,"Scenario A"  
13 358,1,2,2,3,2,1,5,2,1,1,1,4,3,3,"Scenario B"  
14 358,2,2,1,1,2,4,5,1,2,2,2,3,1,1,"Scenario A"  
15 358,1,1,3,3,1,4,1,2,2,1,2,4,3,2,"Scenario B"  
16 358,2,1,2,1,4,2,3,1,1,3,3,1,5,3,"Scenario A"  
17 358,2,2,3,1,1,1,1,1,1,1,3,3,3,4,"Scenario A"  
18 358,1,2,1,2,3,2,4,2,1,2,2,2,5,3,"Scenario B"  
19 358,2,2,3,3,4,3,5,2,1,2,1,3,5,2,"Scenario A"  
20 358,1,2,1,1,2,4,5,2,1,3,3,4,2,4,"Scenario B"  
21 358,1,1,2,2,2,1,1,2,2,3,1,1,1,2,"Scenario B"  
22 341,1,2,2,2,4,3,2,1,1,1,3,3,4,3,"Scenario A"  
23 341,2,1,3,1,2,5,4,1,2,1,3,4,2,1,"Scenario A"  
24 341,1,1,1,3,1,4,5,2,2,2,2,2,3,5,"Scenario B"  
25 341,2,1,2,2,1,4,1,1,2,2,1,3,1,2,"Scenario A"  
26 341,1,1,3,2,2,2,3,2,2,3,3,1,2,4,"Scenario B"  
27 341,2,1,1,1,4,1,2,1,2,3,2,2,5,3,"Scenario A"  
28 341,2,1,1,2,1,4,4,1,2,3,1,3,3,5,"Scenario A"  
29 341,2,2,2,3,3,5,4,1,2,2,3,4,4,1,"Scenario A"  
30 341,1,1,2,1,4,3,5,2,1,1,2,3,5,1,"Scenario B"  
31 341,1,1,3,1,1,1,2,2,2,3,3,2,4,1,"Scenario B"  
32 355,2,1,2,3,1,3,1,1,2,1,1,1,2,2,"Scenario A"  
33 355,1,1,2,1,2,2,3,2,2,3,2,4,1,2,"Scenario A"  
34 355,2,1,3,2,3,5,5,1,2,1,3,4,4,4,"Scenario B"  
35 355,1,2,3,3,1,4,3,2,1,1,1,2,1,4,"Scenario A"  
36 355,1,1,2,1,4,5,5,2,2,1,2,3,4,1,"Scenario B"  
37 355,2,1,2,3,1,1,3,1,2,2,1,2,3,1,"Scenario A"  
38 355,1,2,1,2,1,3,4,2,1,3,3,3,5,1,"Scenario B"  
39 355,2,2,3,2,1,1,5,1,1,2,3,4,2,2,"Scenario B"  
40 355,2,2,3,1,2,4,2,1,1,1,2,2,2,5,"Scenario B"  
41 355,2,2,1,1,3,3,4,1,1,2,3,1,3,5,"Scenario A"  
42 233,1,1,3,3,3,1,2,1,2,2,3,2,2,5,"Scenario A"  
43 233,1,2,3,2,1,1,4,2,1,2,3,4,5,3,"Scenario B"  
44 233,2,2,1,2,3,4,2,1,1,3,1,1,4,5,"Scenario A"  
45 233,1,2,1,1,3,2,1,2,1,1,2,4,3,1,"Scenario A"  
46 233,1,2,2,2,2,3,2,2,2,3,1,4,5,1,"Scenario B"  
47 233,2,1,2,1,2,1,4,1,1,1,3,2,5,2,"Scenario B"  
48 233,2,1,1,3,1,2,1,1,2,3,2,4,3,4,"Scenario A"  
49 233,1,1,3,3,1,5,2,2,2,2,1,3,1,3,"Scenario A"  
50 233,1,1,2,2,3,3,3,2,2,3,1,2,4,5,"Scenario A"  
51 233,1,2,2,3,1,5,4,2,1,3,2,4,2,5,"Scenario A"  
52 354,2,1,2,2,3,2,1,1,2,3,2,1,5,4,"Scenario A"  
53 354,1,2,2,3,2,1,5,2,1,1,1,4,3,3,"Scenario A"  
54 354,2,2,1,1,2,4,5,1,2,2,2,3,1,1,"Scenario B"  
55 354,1,1,3,3,1,4,1,2,2,1,2,4,3,2,"Scenario A"  
56 354,2,1,2,1,4,2,3,1,1,3,3,1,5,3,"Scenario B"  
57 354,2,2,3,1,1,1,1,1,1,1,3,3,3,4,"Scenario A"  
58 354,1,2,1,2,3,2,4,2,1,2,2,2,5,3,"Scenario B"  
59 354,2,2,3,3,4,3,5,2,1,2,1,3,5,2,"Scenario B"  
60

1  
2  
3 354,1,2,1,1,2,4,5,2,1,3,3,4,2,4,"Scenario B"  
4 354,1,1,2,2,2,1,1,2,2,3,1,1,1,2,"Scenario A"  
5 457,1,2,2,2,4,3,2,1,1,1,3,3,4,3,"Scenario A"  
6 457,2,1,3,1,2,5,4,1,2,1,3,4,2,1,"Scenario B"  
7 457,1,1,1,3,1,4,5,2,2,2,2,2,3,5,"Scenario A"  
8 457,2,1,2,2,1,4,1,1,2,2,1,3,1,2,"Scenario A"  
9 457,1,1,3,2,2,2,3,2,2,3,3,1,2,4,"Scenario A"  
10 457,2,1,1,1,4,1,2,1,2,3,2,2,5,3,"Scenario A"  
11 457,2,1,1,2,1,4,4,1,2,3,1,3,3,5,"Scenario A"  
12 457,2,2,2,3,3,5,4,1,2,2,3,4,4,1,"Scenario B"  
13 457,1,1,2,1,4,3,5,2,1,1,2,3,5,1,"Scenario B"  
14 457,1,1,3,1,1,1,2,2,2,3,3,2,4,1,"Scenario B"  
15 404,2,1,2,3,1,3,1,1,2,1,1,1,2,2,"Scenario A"  
16 404,1,1,2,1,2,2,3,2,2,3,2,4,1,2,"Scenario B"  
17 404,2,1,3,2,3,5,5,1,2,1,3,4,4,4,"Scenario A"  
18 404,1,2,3,3,1,4,3,2,1,1,1,2,1,4,"Scenario A"  
19 404,1,1,2,1,4,5,5,2,2,1,2,3,4,1,"Scenario B"  
20 404,2,1,2,3,1,1,3,1,2,2,1,2,3,1,"Scenario B"  
21 404,1,2,1,2,1,3,4,2,1,3,3,3,5,1,"Scenario B"  
22 404,2,2,3,2,1,1,5,1,1,2,3,4,2,2,"Scenario B"  
23 404,2,2,3,1,2,4,2,1,1,1,2,2,2,5,"Scenario A"  
24 404,2,2,1,1,3,3,4,1,1,2,3,1,3,5,"Scenario A"  
25 403,1,1,3,3,3,1,2,1,2,2,3,2,2,5,"Scenario A"  
26 403,1,2,3,2,1,1,4,2,1,2,3,4,5,3,"Scenario A"  
27 403,2,2,1,2,3,4,2,1,1,3,1,1,4,5,"Scenario A"  
28 403,1,2,1,1,3,2,1,2,1,1,2,4,3,1,"Scenario B"  
29 403,1,2,2,2,2,3,2,2,2,3,1,4,5,1,"Scenario B"  
30 403,2,1,2,1,2,1,4,1,1,1,3,2,5,2,"Scenario B"  
31 403,2,1,1,3,1,2,1,1,2,3,2,4,3,4,"Scenario A"  
32 403,1,1,3,3,1,5,2,2,2,2,1,3,1,3,"Scenario A"  
33 403,1,1,2,2,3,3,3,2,2,3,1,2,4,5,"Scenario A"  
34 403,1,2,2,3,1,5,4,2,1,3,2,4,2,5,"Scenario A"  
35 369,2,1,2,2,3,2,1,1,2,3,2,1,5,4,"Scenario A"  
36 369,1,2,2,3,2,1,5,2,1,1,1,4,3,3,"Scenario A"  
37 369,2,2,1,1,2,4,5,1,2,2,2,3,1,1,"Scenario B"  
38 369,1,1,3,3,1,4,1,2,2,1,2,4,3,2,"Scenario B"  
39 369,2,1,2,1,4,2,3,1,1,3,3,1,5,3,"Scenario A"  
40 369,2,2,3,1,1,1,1,1,1,1,3,3,3,4,"Scenario A"  
41 369,1,2,1,2,3,2,4,2,1,2,2,2,5,3,"Scenario B"  
42 369,2,2,3,3,4,3,5,2,1,2,1,3,5,2,"Scenario B"  
43 369,1,2,1,1,2,4,5,2,1,3,3,4,2,4,"Scenario B"  
44 369,1,1,2,2,2,1,1,2,2,3,1,1,1,2,"Scenario A"  
45 455,1,2,2,2,4,3,2,1,1,1,3,3,4,3,"Scenario A"  
46 455,2,1,3,1,2,5,4,1,2,1,3,4,2,1,"Scenario B"  
47 455,1,1,1,3,1,4,5,2,2,2,2,2,3,5,"Scenario B"  
48 455,2,1,2,2,1,4,1,1,2,2,1,3,1,2,"Scenario A"  
49 455,1,1,3,2,2,2,3,2,2,3,3,1,2,4,"Scenario A"  
50 455,2,1,1,1,4,1,2,1,2,3,2,2,5,3,"Scenario B"  
51 455,2,1,1,2,1,4,4,1,2,3,1,3,3,5,"Scenario B"  
52 455,2,2,2,3,3,5,4,1,2,2,3,4,4,1,"Scenario B"  
53 455,1,1,2,1,4,3,5,2,1,1,2,3,5,1,"Scenario A"  
54 455,1,1,3,1,1,1,2,2,2,3,3,2,4,1,"Scenario B"  
55 60,2,1,2,3,1,3,1,1,2,1,1,1,2,2,"Scenario A"  
56 60,1,1,2,1,2,2,3,2,2,3,2,4,1,2,"Scenario B"  
57 60,2,1,3,2,3,5,5,1,2,1,3,4,4,4,"Scenario B"  
58 60,1,2,3,3,1,4,3,2,1,1,1,2,1,4,"Scenario A"  
59 60,1,1,2,1,4,5,5,2,2,1,2,3,4,1,"Scenario B"  
60

1  
2  
3 60,2,1,2,3,1,1,3,1,2,2,1,2,3,1,"Scenario B"  
4 60,1,2,1,2,1,3,4,2,1,3,3,3,5,1,"Scenario B"  
5 60,2,2,3,2,1,1,5,1,1,2,3,4,2,2,"Scenario B"  
6 60,2,2,3,1,2,4,2,1,1,1,2,2,2,5,"Scenario A"  
7 60,2,2,1,1,3,3,4,1,1,2,3,1,3,5,"Scenario A"  
8 7,1,1,3,3,3,1,2,1,2,2,3,2,2,5,"Scenario B"  
9 7,1,2,3,2,1,1,4,2,1,2,3,4,5,3,"Scenario A"  
10 7,2,2,1,2,3,4,2,1,1,3,1,1,4,5,"Scenario B"  
11 7,1,2,1,1,3,2,1,2,1,1,2,4,3,1,"Scenario A"  
12 7,1,2,2,2,2,3,2,2,2,3,1,4,5,1,"Scenario A"  
13 7,2,1,2,1,2,1,4,1,1,1,3,2,5,2,"Scenario B"  
14 7,2,1,1,3,1,2,1,1,2,3,2,4,3,4,"Scenario A"  
15 7,1,1,3,3,1,5,2,2,2,2,1,3,1,3,"Scenario A"  
16 7,1,1,2,2,3,3,3,2,2,3,1,2,4,5,"Scenario B"  
17 7,1,2,2,3,1,5,4,2,1,3,2,4,2,5,"Scenario A"  
18 62,2,1,2,2,3,2,1,1,2,3,2,1,5,4,"Scenario A"  
19 62,1,2,2,3,2,1,5,2,1,1,1,4,3,3,"Scenario B"  
20 62,2,2,1,1,2,4,5,1,2,2,2,3,1,1,"Scenario B"  
21 62,1,1,3,3,1,4,1,2,2,1,2,4,3,2,"Scenario A"  
22 62,2,1,2,1,4,2,3,1,1,3,3,1,5,3,"Scenario A"  
23 62,2,2,3,1,1,1,1,1,1,1,3,3,3,4,"Scenario A"  
24 62,1,2,1,2,3,2,4,2,1,2,2,2,5,3,"Scenario B"  
25 62,2,2,3,3,4,3,5,2,1,2,1,3,5,2,"Scenario B"  
26 62,1,2,1,1,2,4,5,2,1,3,3,4,2,4,"Scenario B"  
27 62,1,1,2,2,2,1,1,2,2,3,1,1,1,2,"Scenario A"  
28 4,1,2,2,2,4,3,2,1,1,1,3,3,4,3,"Scenario A"  
29 4,2,1,3,1,2,5,4,1,2,1,3,4,2,1,"Scenario B"  
30 4,1,1,1,3,1,4,5,2,2,2,2,2,3,5,"Scenario B"  
31 4,2,1,2,2,1,4,1,1,2,2,1,3,1,2,"Scenario A"  
32 4,1,1,3,2,2,2,3,2,2,3,3,1,2,4,"Scenario A"  
33 4,2,1,1,1,4,1,2,1,2,3,2,2,5,3,"Scenario A"  
34 4,2,1,1,2,1,4,4,1,2,3,1,3,3,5,"Scenario A"  
35 4,2,2,2,3,3,5,4,1,2,2,3,4,4,1,"Scenario B"  
36 4,1,1,2,1,4,3,5,2,1,1,2,3,5,1,"Scenario B"  
37 4,1,1,3,1,1,1,2,2,2,3,3,2,4,1,"Scenario B"  
38 63,2,1,2,3,1,3,1,1,2,1,1,1,2,2,"Scenario A"  
39 63,1,1,2,1,2,2,3,2,2,3,2,4,1,2,"Scenario B"  
40 63,2,1,3,2,3,5,5,1,2,1,3,4,4,4,"Scenario A"  
41 63,1,2,3,3,1,4,3,2,1,1,1,2,1,4,"Scenario A"  
42 63,1,1,2,1,4,5,5,2,2,1,2,3,4,1,"Scenario A"  
43 63,2,1,2,3,1,1,3,1,2,2,1,2,3,1,"Scenario B"  
44 63,1,2,1,2,1,3,4,2,1,3,3,3,5,1,"Scenario B"  
45 63,2,2,3,2,1,1,5,1,1,2,3,4,2,2,"Scenario A"  
46 63,2,2,3,1,2,4,2,1,1,1,2,2,2,5,"Scenario B"  
47 63,2,2,1,1,3,3,4,1,1,2,3,1,3,5,"Scenario B"  
48 422,1,1,3,3,3,1,2,1,2,2,3,2,2,5,"Scenario A"  
49 422,1,2,3,2,1,1,4,2,1,2,3,4,5,3,"Scenario B"  
50 422,2,2,1,2,3,4,2,1,1,3,1,1,4,5,"Scenario B"  
51 422,1,2,1,1,3,2,1,2,1,1,2,4,3,1,"Scenario A"  
52 422,1,2,2,2,2,3,2,2,2,3,1,4,5,1,"Scenario A"  
53 422,2,1,2,1,2,1,4,1,1,1,3,2,5,2,"Scenario B"  
54 422,2,1,1,3,1,2,1,1,2,3,2,4,3,4,"Scenario B"  
55 422,1,1,3,3,1,5,2,2,2,2,1,3,1,3,"Scenario B"  
56 422,1,1,2,2,3,3,3,2,2,3,1,2,4,5,"Scenario A"  
57 422,1,2,2,3,1,5,4,2,1,3,2,4,2,5,"Scenario B"  
58 68,2,1,2,2,3,2,1,1,2,3,2,1,5,4,"Scenario A"  
59 68,1,2,2,3,2,1,5,2,1,1,1,4,3,3,"Scenario B"  
60

1  
2  
3 68,2,2,1,1,2,4,5,1,2,2,2,3,1,1,"Scenario B"  
4 68,1,1,3,3,1,4,1,2,2,1,2,4,3,2,"Scenario A"  
5 68,2,1,2,1,4,2,3,1,1,3,3,1,5,3,"Scenario A"  
6 68,2,2,3,1,1,1,1,1,1,1,3,3,3,4,"Scenario A"  
7 68,1,2,1,2,3,2,4,2,1,2,2,2,5,3,"Scenario B"  
8 68,2,2,3,3,4,3,5,2,1,2,1,3,5,2,"Scenario B"  
9 68,1,2,1,1,2,4,5,2,1,3,3,4,2,4,"Scenario B"  
10 68,1,1,2,2,2,1,1,2,2,3,1,1,1,2,"Scenario A"  
11 423,1,2,2,2,4,3,2,1,1,1,3,3,4,3,"Scenario B"  
12 423,2,1,3,1,2,5,4,1,2,1,3,4,2,1,"Scenario A"  
13 423,1,1,1,3,1,4,5,2,2,2,2,2,3,5,"Scenario A"  
14 423,2,1,2,2,1,4,1,1,2,2,1,3,1,2,"Scenario A"  
15 423,1,1,3,2,2,2,3,2,2,3,3,1,2,4,"Scenario A"  
16 423,2,1,1,1,4,1,2,1,2,3,2,2,5,3,"Scenario A"  
17 423,2,1,1,2,1,4,4,1,2,3,1,3,3,5,"Scenario B"  
18 423,2,2,2,3,3,5,4,1,2,2,3,4,4,1,"Scenario A"  
19 423,1,1,2,1,4,3,5,2,1,1,2,3,5,1,"Scenario A"  
20 423,1,1,3,1,1,1,2,2,2,3,3,2,4,1,"Scenario A"  
21 306,2,1,2,3,1,3,1,1,2,1,1,1,2,2,"Scenario A"  
22 306,1,1,2,1,2,2,3,2,2,3,2,4,1,2,"Scenario B"  
23 306,2,1,3,2,3,5,5,1,2,1,3,4,4,4,"Scenario B"  
24 306,1,2,3,3,1,4,3,2,1,1,1,2,1,4,"Scenario B"  
25 306,1,1,2,1,4,5,5,2,2,1,2,3,4,1,"Scenario B"  
26 306,2,1,2,3,1,1,3,1,2,2,1,2,3,1,"Scenario B"  
27 306,1,2,1,2,1,3,4,2,1,3,3,3,5,1,"Scenario A"  
28 306,2,2,3,2,1,1,5,1,1,2,3,4,2,2,"Scenario B"  
29 306,2,2,3,1,2,4,2,1,1,1,2,2,2,5,"Scenario B"  
30 306,2,2,1,1,3,3,4,1,1,2,3,1,3,5,"Scenario B"  
31 376,1,1,3,3,3,1,2,1,2,2,3,2,2,5,"Scenario A"  
32 376,1,2,3,2,1,1,4,2,1,2,3,4,5,3,"Scenario A"  
33 376,2,2,1,2,3,4,2,1,1,3,1,1,4,5,"Scenario A"  
34 376,1,2,1,1,3,2,1,2,1,1,2,4,3,1,"Scenario B"  
35 376,1,2,2,2,2,3,2,2,2,3,1,4,5,1,"Scenario B"  
36 376,2,1,2,1,2,1,4,1,1,1,3,2,5,2,"Scenario B"  
37 376,2,1,1,3,1,2,1,1,2,3,2,4,3,4,"Scenario B"  
38 376,1,1,3,3,1,5,2,2,2,2,1,3,1,3,"Scenario A"  
39 376,1,1,2,2,3,3,3,2,2,3,1,2,4,5,"Scenario A"  
40 376,1,2,2,3,1,5,4,2,1,3,2,4,2,5,"Scenario B"  
41 305,2,1,2,2,3,2,1,1,2,3,2,1,5,4,"Scenario A"  
42 305,1,2,2,3,2,1,5,2,1,1,1,4,3,3,"Scenario A"  
43 305,2,2,1,1,2,4,5,1,2,2,2,3,1,1,"Scenario A"  
44 305,1,1,3,3,1,4,1,2,2,1,2,4,3,2,"Scenario A"  
45 305,2,1,2,1,4,2,3,1,1,3,3,1,5,3,"Scenario B"  
46 305,2,2,3,1,1,1,1,1,1,1,3,3,3,4,"Scenario A"  
47 305,1,2,1,2,3,2,4,2,1,2,2,2,5,3,"Scenario B"  
48 305,2,2,3,3,4,3,5,2,1,2,1,3,5,2,"Scenario A"  
49 305,1,2,1,1,2,4,5,2,1,3,3,4,2,4,"Scenario B"  
50 305,1,1,2,2,2,1,1,2,2,3,1,1,1,2,"Scenario B"  
51 409,1,2,2,2,4,3,2,1,1,1,3,3,4,3,"Scenario A"  
52 409,2,1,3,1,2,5,4,1,2,1,3,4,2,1,"Scenario B"  
53 409,1,1,1,3,1,4,5,2,2,2,2,2,3,5,"Scenario B"  
54 409,2,1,2,2,1,4,1,1,2,2,1,3,1,2,"Scenario A"  
55 409,1,1,3,2,2,2,3,2,2,3,3,1,2,4,"Scenario B"  
56 409,2,1,1,1,4,1,2,1,2,3,2,2,5,3,"Scenario B"  
57 409,2,1,1,2,1,4,4,1,2,3,1,3,3,5,"Scenario B"  
58 409,2,2,2,3,3,5,4,1,2,2,3,4,4,1,"Scenario B"  
59 409,1,1,2,1,4,3,5,2,1,1,2,3,5,1,"Scenario B"  
60

1  
2  
3 409,1,1,3,1,1,1,2,2,2,3,3,2,4,1,"Scenario B"  
4 410,2,1,2,3,1,3,1,1,2,1,1,1,2,2,"Scenario A"  
5 410,1,1,2,1,2,2,3,2,2,3,2,4,1,2,"Scenario B"  
6 410,2,1,3,2,3,5,5,1,2,1,3,4,4,4,"Scenario A"  
7 410,1,2,3,3,1,4,3,2,1,1,1,2,1,4,"Scenario A"  
8 410,1,1,2,1,4,5,5,2,2,1,2,3,4,1,"Scenario B"  
9 410,2,1,2,3,1,1,3,1,2,2,1,2,3,1,"Scenario B"  
10 410,1,2,1,2,1,3,4,2,1,3,3,3,5,1,"Scenario B"  
11 410,2,2,3,2,1,1,5,1,1,2,3,4,2,2,"Scenario B"  
12 410,2,2,3,1,2,4,2,1,1,1,2,2,2,5,"Scenario A"  
13 410,2,2,1,1,3,3,4,1,1,2,3,1,3,5,"Scenario A"  
14 461,1,1,3,3,3,1,2,1,2,2,3,2,2,5,"Scenario B"  
15 461,1,2,3,2,1,1,4,2,1,2,3,4,5,3,"Scenario B"  
16 461,2,2,1,2,3,4,2,1,1,3,1,1,4,5,"Scenario A"  
17 461,1,2,1,1,3,2,1,2,1,1,2,4,3,1,"Scenario B"  
18 461,1,2,2,2,2,3,2,2,2,3,1,4,5,1,"Scenario B"  
19 461,2,1,2,1,2,1,4,1,1,1,3,2,5,2,"Scenario A"  
20 461,2,1,1,3,1,2,1,1,2,3,2,4,3,4,"Scenario B"  
21 461,1,1,3,3,1,5,2,2,2,2,1,3,1,3,"Scenario A"  
22 461,1,1,2,2,3,3,3,2,2,3,1,2,4,5,"Scenario B"  
23 461,1,2,2,3,1,5,4,2,1,3,2,4,2,5,"Scenario A"  
24 437,2,1,2,2,3,2,1,1,2,3,2,1,5,4,"Scenario A"  
25 437,1,2,2,3,2,1,5,2,1,1,1,4,3,3,"Scenario B"  
26 437,2,2,1,1,2,4,5,1,2,2,2,3,1,1,"Scenario B"  
27 437,1,1,3,3,1,4,1,2,2,1,2,4,3,2,"Scenario B"  
28 437,2,1,2,1,4,2,3,1,1,3,3,1,5,3,"Scenario A"  
29 437,2,2,3,1,1,1,1,1,1,1,3,3,3,4,"Scenario A"  
30 437,1,2,1,2,3,2,4,2,1,2,2,2,5,3,"Scenario B"  
31 437,2,2,3,3,4,3,5,2,1,2,1,3,5,2,"Scenario A"  
32 437,1,2,1,2,2,4,5,2,1,3,3,4,2,4,"Scenario B"  
33 437,1,1,2,2,2,1,1,2,2,3,1,1,1,2,"Scenario B"  
34 451,1,2,2,2,4,3,2,1,1,1,3,3,4,3,"Scenario A"  
35 451,2,1,3,1,2,5,4,1,2,1,3,4,2,1,"Scenario B"  
36 451,1,1,1,3,1,4,5,2,2,2,2,2,3,5,"Scenario B"  
37 451,2,1,2,2,1,4,1,1,2,2,1,3,1,2,"Scenario A"  
38 451,1,1,3,2,2,2,3,2,2,3,3,1,2,4,"Scenario A"  
39 451,2,1,1,1,4,1,2,1,2,3,2,2,5,3,"Scenario A"  
40 451,2,1,1,2,1,4,4,1,2,3,1,3,3,5,"Scenario A"  
41 451,2,2,2,3,3,5,4,1,2,2,3,4,4,1,"Scenario B"  
42 451,1,1,2,1,4,3,5,2,1,1,2,3,5,1,"Scenario B"  
43 451,1,1,3,1,1,1,2,2,2,3,3,2,4,1,"Scenario B"  
44 446,2,1,2,3,1,3,1,1,2,1,1,1,2,2,"Scenario A"  
45 446,1,1,2,1,2,2,3,2,2,3,2,4,1,2,"Scenario B"  
46 446,2,1,3,2,3,5,5,1,2,1,3,4,4,4,"Scenario B"  
47 446,1,2,3,3,1,4,3,2,1,1,1,2,1,4,"Scenario A"  
48 446,1,1,2,1,4,5,5,2,2,1,2,3,4,1,"Scenario B"  
49 446,2,1,2,3,1,1,3,1,2,2,1,2,3,1,"Scenario B"  
50 446,1,2,1,2,1,3,4,2,1,3,3,3,5,1,"Scenario B"  
51 446,2,2,3,2,1,1,5,1,1,2,3,4,2,2,"Scenario B"  
52 446,2,2,3,1,2,4,2,1,1,1,2,2,2,5,"Scenario A"  
53 446,2,2,1,1,3,3,4,1,1,2,3,1,3,5,"Scenario A"  
54 320,1,1,3,3,3,1,2,1,2,2,3,2,2,5,"Scenario A"  
55 320,1,2,3,2,1,1,4,2,1,2,3,4,5,3,"Scenario A"  
56 320,2,2,1,2,3,4,2,1,1,3,1,1,4,5,"Scenario A"  
57 320,1,2,1,1,3,2,1,2,1,1,2,4,3,1,"Scenario A"  
58 320,1,2,2,2,2,3,2,2,2,3,1,4,5,1,"Scenario A"  
59 320,2,1,2,1,2,1,4,1,1,1,3,2,5,2,"Scenario A"  
60

1  
2  
3 320,2,1,1,3,1,2,1,1,2,3,2,4,3,4,"Scenario A"  
4 320,1,1,3,3,1,5,2,2,2,2,1,3,1,3,"Scenario B"  
5 320,1,1,2,2,3,3,3,2,2,3,1,2,4,5,"Scenario A"  
6 320,1,2,2,3,1,5,4,2,1,3,2,4,2,5,"Scenario A"  
7 449,2,1,2,2,3,2,1,1,2,3,2,1,5,4,"Scenario A"  
8 449,1,2,2,3,2,1,5,2,1,1,1,4,3,3,"Scenario B"  
9 449,2,2,1,1,2,4,5,1,2,2,2,3,1,1,"Scenario B"  
10 449,1,1,3,3,1,4,1,2,2,1,2,4,3,2,"Scenario A"  
11 449,2,1,2,1,4,2,3,1,1,3,3,1,5,3,"Scenario A"  
12 449,2,2,3,1,1,1,1,1,1,1,3,3,3,4,"Scenario A"  
13 449,1,2,1,2,3,2,4,2,1,2,2,2,5,3,"Scenario A"  
14 449,2,2,3,3,4,3,5,2,1,2,1,3,5,2,"Scenario A"  
15 449,1,2,1,1,2,4,5,2,1,3,3,4,2,4,"Scenario B"  
16 449,1,1,2,2,2,1,1,2,2,3,1,1,1,2,"Scenario B"  
17 450,1,2,2,2,4,3,2,1,1,1,3,3,4,3,"Scenario A"  
18 450,2,1,3,1,2,5,4,1,2,1,3,4,2,1,"Scenario B"  
19 450,1,1,1,3,1,4,5,2,2,2,2,2,3,5,"Scenario B"  
20 450,2,1,2,2,1,4,1,1,2,2,1,3,1,2,"Scenario B"  
21 450,1,1,3,2,2,2,3,2,2,3,3,1,2,4,"Scenario B"  
22 450,2,1,1,1,4,1,2,1,2,3,2,2,5,3,"Scenario A"  
23 450,2,1,1,2,1,4,4,1,2,3,1,3,3,5,"Scenario B"  
24 450,2,2,2,3,3,5,4,1,2,2,3,4,4,1,"Scenario B"  
25 450,1,1,2,1,4,3,5,2,1,1,2,3,5,1,"Scenario A"  
26 450,1,1,3,1,1,1,2,2,2,3,3,2,4,1,"Scenario B"  
27 448,2,1,2,3,1,3,1,1,2,1,1,1,2,2,"Scenario A"  
28 448,1,1,2,1,2,2,3,2,2,3,2,4,1,2,"Scenario B"  
29 448,2,1,3,2,3,5,5,1,2,1,3,4,4,4,"Scenario B"  
30 448,1,2,3,3,1,4,3,2,1,1,1,2,1,4,"Scenario A"  
31 448,1,1,2,1,4,5,5,2,2,1,2,3,4,1,"Scenario B"  
32 448,2,1,2,3,1,1,3,1,2,2,1,2,3,1,"Scenario B"  
33 448,1,2,1,2,1,3,4,2,1,3,3,3,5,1,"Scenario B"  
34 448,2,2,3,2,1,1,5,1,1,2,3,4,2,2,"Scenario B"  
35 448,2,2,3,1,2,4,2,1,1,1,2,2,2,5,"Scenario A"  
36 448,2,2,1,1,3,3,4,1,1,2,3,1,3,5,"Scenario B"  
37 447,1,1,3,3,3,1,2,1,2,2,3,2,2,5,"Scenario A"  
38 447,1,2,3,2,1,1,4,2,1,2,3,4,5,3,"Scenario A"  
39 447,2,2,1,2,3,4,2,1,1,3,1,1,4,5,"Scenario A"  
40 447,1,2,1,1,3,2,1,2,1,1,2,4,3,1,"Scenario A"  
41 447,1,2,2,2,2,3,2,2,2,3,1,4,5,1,"Scenario A"  
42 447,2,1,2,1,2,1,4,1,1,1,3,2,5,2,"Scenario B"  
43 447,2,1,1,3,1,2,1,1,2,3,2,4,3,4,"Scenario A"  
44 447,1,1,3,3,1,5,2,2,2,2,1,3,1,3,"Scenario B"  
45 447,1,1,2,2,3,3,3,2,2,3,1,2,4,5,"Scenario A"  
46 447,1,2,2,3,1,5,4,2,1,3,2,4,2,5,"Scenario B"  
47 405,2,1,2,2,3,2,1,1,2,3,2,1,5,4,"Scenario A"  
48 405,1,2,2,3,2,1,5,2,1,1,1,4,3,3,"Scenario B"  
49 405,2,2,1,1,2,4,5,1,2,2,2,3,1,1,"Scenario B"  
50 405,1,1,3,3,1,4,1,2,2,1,2,4,3,2,"Scenario A"  
51 405,2,1,2,1,4,2,3,1,1,3,3,1,5,3,"Scenario B"  
52 405,2,2,3,1,1,1,1,1,1,1,3,3,3,4,"Scenario A"  
53 405,1,2,1,2,3,2,4,2,1,2,2,2,5,3,"Scenario A"  
54 405,2,2,3,3,4,3,5,2,1,2,1,3,5,2,"Scenario A"  
55 405,1,2,1,1,2,4,5,2,1,3,3,4,2,4,"Scenario B"  
56 405,1,1,2,2,2,1,1,2,2,3,1,1,1,2,"Scenario A"  
57 453,1,2,2,2,4,3,2,1,1,1,3,3,4,3,"Scenario A"  
58 453,2,1,3,1,2,5,4,1,2,1,3,4,2,1,"Scenario B"  
59 453,1,1,1,3,1,4,5,2,2,2,2,2,3,5,"Scenario B"  
60



1  
2  
3 453,2,1,2,2,1,4,1,1,2,2,1,3,1,2,"Scenario A"  
4 453,1,1,3,2,2,2,3,2,2,3,3,1,2,4,"Scenario A"  
5 453,2,1,1,1,4,1,2,1,2,3,2,2,5,3,"Scenario A"  
6 453,2,1,1,2,1,4,4,1,2,3,1,3,3,5,"Scenario A"  
7 453,2,2,2,3,3,5,4,1,2,2,3,4,4,1,"Scenario B"  
8 453,1,1,2,1,4,3,5,2,1,1,2,3,5,1,"Scenario B"  
9 453,1,1,3,1,1,1,2,2,2,3,3,2,4,1,"Scenario B"  
10 443,2,1,2,3,1,3,1,1,2,1,1,1,2,2,"Scenario A"  
11 443,1,1,2,1,2,2,3,2,2,3,2,4,1,2,"Scenario B"  
12 443,2,1,3,2,3,5,5,1,2,1,3,4,4,4,"Scenario B"  
13 443,1,2,3,3,1,4,3,2,1,1,1,2,1,4,"Scenario A"  
14 443,1,1,2,1,4,5,5,2,2,1,2,3,4,1,"Scenario B"  
15 443,2,1,2,3,1,1,3,1,2,2,1,2,3,1,"Scenario B"  
16 443,1,2,1,2,1,3,4,2,1,3,3,3,5,1,"Scenario A"  
17 443,2,2,3,2,1,1,5,1,1,2,3,4,2,2,"Scenario B"  
18 443,2,2,3,1,2,4,2,1,1,1,2,2,2,5,"Scenario A"  
19 443,2,2,1,1,3,3,4,1,1,2,3,1,3,5,"Scenario A"  
20 3,1,1,3,3,3,1,2,1,2,2,3,2,2,5,"Scenario A"  
21 3,1,2,3,2,1,1,4,2,1,2,3,4,5,3,"Scenario A"  
22 3,2,2,1,2,3,4,2,1,1,3,1,1,4,5,"Scenario B"  
23 3,1,2,1,1,3,2,1,2,1,1,2,4,3,1,"Scenario A"  
24 3,1,2,2,2,2,3,2,2,2,3,1,4,5,1,"Scenario A"  
25 3,2,1,2,1,2,1,4,1,1,1,3,2,5,2,"Scenario B"  
26 3,2,1,1,3,1,2,1,1,2,3,2,4,3,4,"Scenario A"  
27 3,1,1,3,3,1,5,2,2,2,2,1,3,1,3,"Scenario A"  
28 3,1,1,2,2,3,3,3,2,2,3,1,2,4,5,"Scenario A"  
29 3,1,2,2,3,1,5,4,2,1,3,2,4,2,5,"Scenario A"  
30 81,2,1,2,2,3,2,1,1,2,3,2,1,5,4,"Scenario B"  
31 81,1,2,2,3,2,1,5,2,1,1,1,4,3,3,"Scenario A"  
32 81,2,2,1,1,2,4,5,1,2,2,2,3,1,1,"Scenario A"  
33 81,1,1,3,3,1,4,1,2,2,1,2,4,3,2,"Scenario B"  
34 81,2,1,2,1,4,2,3,1,1,3,3,1,5,3,"Scenario A"  
35 81,2,2,3,1,1,1,1,1,1,1,3,3,3,4,"Scenario A"  
36 81,1,2,1,2,3,2,4,2,1,2,2,2,5,3,"Scenario A"  
37 81,2,2,3,3,4,3,5,2,1,2,1,3,5,2,"Scenario A"  
38 81,1,2,1,1,2,4,5,2,1,3,3,4,2,4,"Scenario B"  
39 81,1,1,2,2,2,1,1,2,2,3,1,1,1,2,"Scenario B"  
40 317,1,2,2,2,4,3,2,1,1,1,3,3,4,3,"Scenario A"  
41 317,2,1,3,1,2,5,4,1,2,1,3,4,2,1,"Scenario B"  
42 317,1,1,1,3,1,4,5,2,2,2,2,2,3,5,"Scenario B"  
43 317,2,1,2,2,1,4,1,1,2,2,1,3,1,2,"Scenario A"  
44 317,1,1,3,2,2,2,3,2,2,3,3,1,2,4,"Scenario A"  
45 317,2,1,1,1,4,1,2,1,2,3,2,2,5,3,"Scenario A"  
46 317,2,1,1,2,1,4,4,1,2,3,1,3,3,5,"Scenario B"  
47 317,2,2,2,3,3,5,4,1,2,2,3,4,4,1,"Scenario B"  
48 317,1,1,2,1,4,3,5,2,1,1,2,3,5,1,"Scenario B"  
49 317,1,1,3,1,1,1,2,2,2,3,3,2,4,1,"Scenario B"  
50 322,2,1,2,3,1,3,1,1,2,1,1,1,2,2,"Scenario A"  
51 322,1,1,2,1,2,2,3,2,2,3,2,4,1,2,"Scenario A"  
52 322,2,1,3,2,3,5,5,1,2,1,3,4,4,4,"Scenario A"  
53 322,1,2,3,3,1,4,3,2,1,1,1,2,1,4,"Scenario B"  
54 322,1,1,2,1,4,5,5,2,2,1,2,3,4,1,"Scenario A"  
55 322,2,1,2,3,1,1,3,1,2,2,1,2,3,1,"Scenario B"  
56 322,1,2,1,2,1,3,4,2,1,3,3,3,5,1,"Scenario B"  
57 322,2,2,3,2,1,1,5,1,1,2,3,4,2,2,"Scenario B"  
58 322,2,2,3,1,2,4,2,1,1,1,2,2,2,5,"Scenario A"  
59 322,2,2,1,1,3,3,4,1,1,2,3,1,3,5,"Scenario A"  
60

1  
2  
3 321,1,1,3,3,3,1,2,1,2,2,3,2,2,5,"Scenario A"  
4 321,1,2,3,2,1,1,4,2,1,2,3,4,5,3,"Scenario A"  
5 321,2,2,1,2,3,4,2,1,1,3,1,1,4,5,"Scenario B"  
6 321,1,2,1,1,3,2,1,2,1,1,2,4,3,1,"Scenario A"  
7 321,1,2,2,2,2,3,2,2,2,3,1,4,5,1,"Scenario A"  
8 321,2,1,2,1,2,1,4,1,1,1,3,2,5,2,"Scenario B"  
9 321,2,1,1,3,1,2,1,1,2,3,2,4,3,4,"Scenario A"  
10 321,1,1,3,3,1,5,2,2,2,2,1,3,1,3,"Scenario B"  
11 321,1,1,2,2,3,3,3,2,2,3,1,2,4,5,"Scenario A"  
12 321,1,2,2,3,1,5,4,2,1,3,2,4,2,5,"Scenario B"  
13 1,2,1,2,2,3,2,1,1,2,3,2,1,5,4,"Scenario A"  
14 1,1,2,2,3,2,1,5,2,1,1,1,4,3,3,"Scenario B"  
15 1,2,2,1,1,2,4,5,1,2,2,2,3,1,1,"Scenario B"  
16 1,1,1,3,3,1,4,1,2,2,1,2,4,3,2,"Scenario A"  
17 1,2,1,2,1,4,2,3,1,1,3,3,1,5,3,"Scenario B"  
18 1,2,2,3,1,1,1,1,1,1,1,3,3,3,4,"Scenario A"  
19 1,1,2,1,2,3,2,4,2,1,2,2,2,5,3,"Scenario B"  
20 1,2,2,3,3,4,3,5,2,1,2,1,3,5,2,"Scenario B"  
21 1,1,2,1,1,2,4,5,2,1,3,3,4,2,4,"Scenario B"  
22 1,1,1,2,2,2,1,1,2,2,3,1,1,1,2,"Scenario A"  
23 324,1,2,2,2,4,3,2,1,1,1,3,3,4,3,"Scenario A"  
24 324,2,1,3,1,2,5,4,1,2,1,3,4,2,1,"Scenario B"  
25 324,1,1,1,3,1,4,5,2,2,2,2,2,3,5,"Scenario B"  
26 324,2,1,2,2,1,4,1,1,2,2,1,3,1,2,"Scenario A"  
27 324,1,1,3,2,2,2,3,2,2,3,3,1,2,4,"Scenario A"  
28 324,2,1,1,1,4,1,2,1,2,3,2,2,5,3,"Scenario A"  
29 324,2,1,1,2,1,4,4,1,2,3,1,3,3,5,"Scenario B"  
30 324,2,2,2,3,3,5,4,1,2,2,3,4,4,1,"Scenario B"  
31 324,1,1,2,1,4,3,5,2,1,1,2,3,5,1,"Scenario B"  
32 324,1,1,3,1,1,1,2,2,2,3,3,2,4,1,"Scenario B"  
33 323,2,1,2,3,1,3,1,1,2,1,1,1,2,2,"Scenario A"  
34 323,1,1,2,1,2,2,3,2,2,3,2,4,1,2,"Scenario A"  
35 323,2,1,3,2,3,5,5,1,2,1,3,4,4,4,"Scenario A"  
36 323,1,2,3,3,1,4,3,2,1,1,1,2,1,4,"Scenario B"  
37 323,1,1,2,1,4,5,5,2,2,1,2,3,4,1,"Scenario A"  
38 323,2,1,2,3,1,1,3,1,2,2,1,2,3,1,"Scenario B"  
39 323,1,2,1,2,1,3,4,2,1,3,3,3,5,1,"Scenario B"  
40 323,2,2,3,2,1,1,5,1,1,2,3,4,2,2,"Scenario B"  
41 323,2,2,3,1,2,4,2,1,1,1,2,2,2,5,"Scenario A"  
42 323,2,2,1,1,3,3,4,1,1,2,3,1,3,5,"Scenario A"  
43 325,1,1,3,3,3,1,2,1,2,2,3,2,2,5,"Scenario A"  
44 325,1,2,3,2,1,1,4,2,1,2,3,4,5,3,"Scenario A"  
45 325,2,2,1,2,3,4,2,1,1,3,1,1,4,5,"Scenario B"  
46 325,1,2,1,1,3,2,1,2,1,1,2,4,3,1,"Scenario A"  
47 325,1,2,2,2,2,3,2,2,2,3,1,4,5,1,"Scenario A"  
48 325,2,1,2,1,2,1,4,1,1,1,3,2,5,2,"Scenario B"  
49 325,2,1,1,3,1,2,1,1,2,3,2,4,3,4,"Scenario A"  
50 325,1,1,3,3,1,5,2,2,2,2,1,3,1,3,"Scenario B"  
51 325,1,1,2,2,3,3,3,2,2,3,1,2,4,5,"Scenario A"  
52 325,1,2,2,3,1,5,4,2,1,3,2,4,2,5,"Scenario B"  
53 2,2,1,2,2,3,2,1,1,2,3,2,1,5,4,"Scenario B"  
54 2,1,2,2,3,2,1,5,2,1,1,1,4,3,3,"Scenario A"  
55 2,2,2,1,1,2,4,5,1,2,2,2,3,1,1,"Scenario B"  
56 2,1,1,3,3,1,4,1,2,2,1,2,4,3,2,"Scenario A"  
57 2,2,1,2,1,4,2,3,1,1,3,3,1,5,3,"Scenario B"  
58 2,2,2,3,1,1,1,1,1,1,1,3,3,3,4,"Scenario A"  
59 2,1,2,1,2,3,2,4,2,1,2,2,2,5,3,"Scenario A"  
60

1  
2  
3 2, 2, 2, 3, 3, 4, 3, 5, 2, 1, 2, 1, 3, 5, 2, "Scenario A"  
4 2, 1, 2, 1, 1, 2, 4, 5, 2, 1, 3, 3, 4, 2, 4, "Scenario B"  
5 2, 1, 1, 2, 2, 2, 1, 1, 2, 2, 3, 1, 1, 1, 2, "Scenario B"  
6 313, 1, 2, 2, 2, 4, 3, 2, 1, 1, 1, 3, 3, 4, 3, "Scenario A"  
7 313, 2, 1, 3, 1, 2, 5, 4, 1, 2, 1, 3, 4, 2, 1, "Scenario B"  
8 313, 1, 1, 1, 3, 1, 4, 5, 2, 2, 2, 2, 2, 3, 5, "Scenario B"  
9 313, 2, 1, 2, 2, 1, 4, 1, 1, 2, 2, 1, 3, 1, 2, "Scenario A"  
10 313, 1, 1, 3, 2, 2, 2, 3, 2, 2, 3, 3, 1, 2, 4, "Scenario A"  
11 313, 2, 1, 1, 1, 4, 1, 2, 1, 2, 3, 2, 2, 5, 3, "Scenario A"  
12 313, 2, 1, 1, 2, 1, 4, 4, 1, 2, 3, 1, 3, 3, 5, "Scenario B"  
13 313, 2, 2, 2, 3, 3, 5, 4, 1, 2, 2, 3, 4, 4, 1, "Scenario B"  
14 313, 1, 1, 2, 1, 4, 3, 5, 2, 1, 1, 2, 3, 5, 1, "Scenario B"  
15 313, 1, 1, 3, 1, 1, 1, 2, 2, 2, 3, 3, 2, 4, 1, "Scenario B"  
16 318, 2, 1, 2, 3, 1, 3, 1, 1, 2, 1, 1, 1, 2, 2, "Scenario A"  
17 318, 1, 1, 2, 1, 2, 2, 3, 2, 2, 3, 2, 4, 1, 2, "Scenario A"  
18 318, 2, 1, 3, 2, 3, 5, 5, 1, 2, 1, 3, 4, 4, 4, "Scenario A"  
19 318, 1, 2, 3, 3, 1, 4, 3, 2, 1, 1, 1, 2, 1, 4, "Scenario B"  
20 318, 1, 1, 2, 1, 4, 5, 5, 2, 2, 1, 2, 3, 4, 1, "Scenario A"  
21 318, 2, 1, 2, 3, 1, 1, 3, 1, 2, 2, 1, 2, 3, 1, "Scenario B"  
22 318, 1, 2, 1, 2, 1, 3, 4, 2, 1, 3, 3, 3, 5, 1, "Scenario B"  
23 318, 2, 2, 3, 2, 1, 1, 5, 1, 1, 2, 3, 4, 2, 2, "Scenario B"  
24 318, 2, 2, 3, 1, 2, 4, 2, 1, 1, 1, 2, 2, 2, 5, "Scenario A"  
25 318, 2, 2, 1, 1, 3, 3, 4, 1, 1, 2, 3, 1, 3, 5, "Scenario A"  
26 319, 1, 1, 3, 3, 3, 1, 2, 1, 2, 2, 3, 2, 2, 5, "Scenario A"  
27 319, 1, 2, 3, 2, 1, 1, 4, 2, 1, 2, 3, 4, 5, 3, "Scenario A"  
28 319, 2, 2, 1, 2, 3, 4, 2, 1, 1, 3, 1, 1, 4, 5, "Scenario B"  
29 319, 1, 2, 1, 1, 3, 2, 1, 2, 1, 1, 2, 4, 3, 1, "Scenario A"  
30 319, 1, 2, 2, 2, 2, 3, 2, 2, 2, 3, 1, 4, 5, 1, "Scenario A"  
31 319, 2, 1, 2, 1, 2, 1, 4, 1, 1, 1, 3, 2, 5, 2, "Scenario B"  
32 319, 2, 1, 1, 3, 1, 2, 1, 1, 2, 3, 2, 4, 3, 4, "Scenario A"  
33 319, 1, 1, 3, 3, 1, 5, 2, 2, 2, 2, 1, 3, 1, 3, "Scenario B"  
34 319, 1, 1, 2, 2, 3, 3, 3, 2, 2, 3, 1, 2, 4, 5, "Scenario A"  
35 319, 1, 2, 2, 3, 1, 5, 4, 2, 1, 3, 2, 4, 2, 5, "Scenario B"  
36 326, 2, 1, 2, 2, 3, 2, 1, 1, 2, 3, 2, 1, 5, 4, "Scenario B"  
37 326, 1, 2, 2, 3, 2, 1, 5, 2, 1, 1, 1, 4, 3, 3, "Scenario A"  
38 326, 2, 2, 1, 1, 2, 4, 5, 1, 2, 2, 2, 3, 1, 1, "Scenario B"  
39 326, 1, 1, 3, 3, 1, 4, 1, 2, 2, 1, 2, 4, 3, 2, "Scenario A"  
40 326, 2, 1, 2, 1, 4, 2, 3, 1, 1, 3, 3, 1, 5, 3, "Scenario B"  
41 326, 2, 2, 3, 1, 1, 1, 1, 1, 1, 1, 3, 3, 3, 4, "Scenario A"  
42 326, 1, 2, 1, 2, 3, 2, 4, 2, 1, 2, 2, 2, 5, 3, "Scenario B"  
43 326, 2, 2, 3, 3, 4, 3, 5, 2, 1, 2, 1, 3, 5, 2, "Scenario A"  
44 326, 1, 2, 1, 1, 2, 4, 5, 2, 1, 3, 3, 4, 2, 4, "Scenario B"  
45 326, 1, 1, 2, 2, 2, 1, 1, 2, 2, 3, 1, 1, 1, 2, "Scenario B"  
46 307, 1, 2, 2, 2, 4, 3, 2, 1, 1, 1, 3, 3, 4, 3, "Scenario A"  
47 307, 2, 1, 3, 1, 2, 5, 4, 1, 2, 1, 3, 4, 2, 1, "Scenario B"  
48 307, 1, 1, 1, 3, 1, 4, 5, 2, 2, 2, 2, 2, 3, 5, "Scenario B"  
49 307, 2, 1, 2, 2, 1, 4, 1, 1, 2, 2, 1, 3, 1, 2, "Scenario A"  
50 307, 1, 1, 3, 2, 2, 2, 3, 2, 2, 3, 3, 1, 2, 4, "Scenario A"  
51 307, 2, 1, 1, 1, 4, 1, 2, 1, 2, 3, 2, 2, 5, 3, "Scenario A"  
52 307, 2, 1, 1, 2, 1, 4, 4, 1, 2, 3, 1, 3, 3, 5, "Scenario B"  
53 307, 2, 2, 2, 3, 3, 5, 4, 1, 2, 2, 3, 4, 4, 1, "Scenario B"  
54 307, 1, 1, 2, 1, 4, 3, 5, 2, 1, 1, 2, 3, 5, 1, "Scenario B"  
55 307, 1, 1, 3, 1, 1, 1, 2, 2, 2, 3, 3, 2, 4, 1, "Scenario B"  
56 278, 2, 1, 2, 3, 1, 3, 1, 1, 2, 1, 1, 1, 2, 2, "Scenario A"  
57 278, 1, 1, 2, 1, 2, 2, 3, 2, 2, 3, 2, 4, 1, 2, "Scenario B"  
58 278, 2, 1, 3, 2, 3, 5, 5, 1, 2, 1, 3, 4, 4, 4, "Scenario A"  
59 278, 1, 2, 3, 3, 1, 4, 3, 2, 1, 1, 1, 2, 1, 4, "Scenario A"  
60

1  
2  
3 278,1,1,2,1,4,5,5,2,2,1,2,3,4,1,"Scenario B"  
4 278,2,1,2,3,1,1,3,1,2,2,1,2,3,1,"Scenario A"  
5 278,1,2,1,2,1,3,4,2,1,3,3,3,5,1,"Scenario B"  
6 278,2,2,3,2,1,1,5,1,1,2,3,4,2,2,"Scenario B"  
7 278,2,2,3,1,2,4,2,1,1,1,2,2,2,5,"Scenario A"  
8 278,2,2,1,1,3,3,4,1,1,2,3,1,3,5,"Scenario B"  
9 283,1,1,3,3,3,1,2,1,2,2,3,2,2,5,"Scenario B"  
10 283,1,2,3,2,1,1,4,2,1,2,3,4,5,3,"Scenario A"  
11 283,2,2,1,2,3,4,2,1,1,3,1,1,4,5,"Scenario A"  
12 283,1,2,1,1,3,2,1,2,1,1,2,4,3,1,"Scenario A"  
13 283,1,2,2,2,2,3,2,2,2,3,1,4,5,1,"Scenario A"  
14 283,2,1,2,1,2,1,4,1,1,1,1,3,2,5,2,"Scenario A"  
15 283,2,1,1,3,1,2,1,1,2,3,2,4,3,4,"Scenario B"  
16 283,1,1,3,3,1,5,2,2,2,2,1,3,1,3,"Scenario B"  
17 283,1,1,2,2,3,3,3,2,2,3,1,2,4,5,"Scenario A"  
18 283,1,2,2,3,1,5,4,2,1,3,2,4,2,5,"Scenario B"  
19 279,2,1,2,2,3,2,1,1,2,3,2,1,5,4,"Scenario B"  
20 279,1,2,2,3,2,1,5,2,1,1,1,4,3,3,"Scenario A"  
21 279,2,2,1,1,2,4,5,1,2,2,2,3,1,1,"Scenario B"  
22 279,1,1,3,3,1,4,1,2,2,1,2,4,3,2,"Scenario B"  
23 279,2,1,2,1,4,2,3,1,1,3,3,1,5,3,"Scenario B"  
24 279,2,2,3,1,1,1,1,1,1,1,3,3,3,4,"Scenario A"  
25 279,1,2,1,2,3,2,4,2,1,2,2,2,5,3,"Scenario B"  
26 279,2,2,3,3,4,3,5,2,1,2,1,3,5,2,"Scenario A"  
27 279,1,2,1,1,2,4,5,2,1,3,3,4,2,4,"Scenario B"  
28 279,1,1,2,2,2,1,1,2,2,3,1,1,1,2,"Scenario B"  
29 329,1,2,2,2,4,3,2,1,1,1,3,3,4,3,"Scenario A"  
30 329,2,1,3,1,2,5,4,1,2,1,3,4,2,1,"Scenario B"  
31 329,1,1,1,3,1,4,5,2,2,2,2,2,3,5,"Scenario B"  
32 329,2,1,2,2,1,4,1,1,2,2,1,3,1,2,"Scenario B"  
33 329,1,1,3,2,2,2,3,2,2,3,3,1,2,4,"Scenario B"  
34 329,2,1,1,1,4,1,2,1,2,3,2,2,5,3,"Scenario B"  
35 329,2,1,1,2,1,4,4,1,2,3,1,3,3,5,"Scenario B"  
36 329,2,2,2,3,3,5,4,1,2,2,3,4,4,1,"Scenario B"  
37 329,1,1,2,1,4,3,5,2,1,1,2,3,5,1,"Scenario B"  
38 329,1,1,3,1,1,1,2,2,2,3,3,2,4,1,"Scenario B"  
39 332,2,1,2,3,1,3,1,1,2,1,1,1,2,2,"Scenario A"  
40 332,1,1,2,1,2,2,3,2,2,3,2,4,1,2,"Scenario B"  
41 332,2,1,3,2,3,5,5,1,2,1,3,4,4,4,"Scenario A"  
42 332,1,2,3,3,1,4,3,2,1,1,1,2,1,4,"Scenario A"  
43 332,1,1,2,1,4,5,5,2,2,1,2,3,4,1,"Scenario A"  
44 332,2,1,2,3,1,1,3,1,2,2,1,2,3,1,"Scenario A"  
45 332,1,2,1,2,1,3,4,2,1,3,3,3,5,1,"Scenario A"  
46 332,2,2,3,2,1,1,5,1,1,2,3,4,2,2,"Scenario B"  
47 332,2,2,3,1,2,4,2,1,1,1,2,2,2,5,"Scenario B"  
48 332,2,2,1,1,3,3,4,1,1,2,3,1,3,5,"Scenario B"  
49 337,1,1,3,3,3,1,2,1,2,2,3,2,2,5,"Scenario A"  
50 337,1,2,3,2,1,1,4,2,1,2,3,4,5,3,"Scenario A"  
51 337,2,2,1,2,3,4,2,1,1,3,1,1,4,5,"Scenario A"  
52 337,1,2,1,1,3,2,1,2,1,1,2,4,3,1,"Scenario A"  
53 337,1,2,2,2,2,3,2,2,2,3,1,4,5,1,"Scenario B"  
54 337,2,1,2,1,2,1,4,1,1,1,3,2,5,2,"Scenario A"  
55 337,2,1,1,3,1,2,1,1,2,3,2,4,3,4,"Scenario A"  
56 337,1,1,3,3,1,5,2,2,2,2,1,3,1,3,"Scenario B"  
57 337,1,1,2,2,3,3,3,2,2,3,1,2,4,5,"Scenario A"  
58 337,1,2,2,3,1,5,4,2,1,3,2,4,2,5,"Scenario A"  
59 336,2,1,2,2,3,2,1,1,2,3,2,1,5,4,"Scenario A"  
60

1  
2  
3 336,1,2,2,3,2,1,5,2,1,1,1,4,3,3,"Scenario B"  
4 336,2,2,1,1,2,4,5,1,2,2,2,3,1,1,"Scenario B"  
5 336,1,1,3,3,1,4,1,2,2,1,2,4,3,2,"Scenario A"  
6 336,2,1,2,1,4,2,3,1,1,3,3,1,5,3,"Scenario A"  
7 336,2,2,3,1,1,1,1,1,1,1,3,3,3,4,"Scenario A"  
8 336,1,2,1,2,3,2,4,2,1,2,2,2,5,3,"Scenario A"  
9 336,2,2,3,3,4,3,5,2,1,2,1,3,5,2,"Scenario B"  
10 336,1,2,1,1,2,4,5,2,1,3,3,4,2,4,"Scenario B"  
11 336,1,1,2,2,2,1,1,2,2,3,1,1,1,2,"Scenario A"  
12 335,1,2,2,2,4,3,2,1,1,1,3,3,4,3,"Scenario A"  
13 335,2,1,3,1,2,5,4,1,2,1,3,4,2,1,"Scenario B"  
14 335,1,1,1,3,1,4,5,2,2,2,2,2,3,5,"Scenario B"  
15 335,2,1,2,3,1,4,1,1,2,2,1,3,1,2,"Scenario B"  
16 335,1,1,3,2,2,2,3,2,2,3,3,1,2,4,"Scenario A"  
17 335,2,1,1,1,4,1,2,1,2,3,2,2,5,3,"Scenario A"  
18 335,2,1,1,2,1,4,4,1,2,3,1,3,3,5,"Scenario A"  
19 335,2,2,2,3,3,5,4,1,2,2,3,4,4,1,"Scenario B"  
20 335,1,1,2,1,4,3,5,2,1,1,2,3,5,1,"Scenario B"  
21 335,1,1,3,1,1,1,2,2,2,3,3,2,4,1,"Scenario B"  
22 333,2,1,2,3,1,3,1,1,2,1,1,1,2,2,"Scenario A"  
23 333,1,1,2,1,2,2,3,2,2,3,2,4,1,2,"Scenario B"  
24 333,2,1,3,2,3,5,5,1,2,1,3,4,4,4,"Scenario B"  
25 333,1,2,3,3,1,4,3,2,1,1,1,2,1,4,"Scenario B"  
26 333,1,1,2,1,4,5,5,2,2,1,2,3,4,1,"Scenario A"  
27 333,2,1,2,3,1,1,3,1,2,2,1,2,3,1,"Scenario A"  
28 333,1,2,1,2,1,3,4,2,1,3,3,3,5,1,"Scenario A"  
29 333,2,2,3,2,1,1,5,1,1,2,3,4,2,2,"Scenario A"  
30 333,2,2,3,1,2,4,2,1,1,1,2,2,2,5,"Scenario A"  
31 333,2,2,1,1,3,3,4,1,1,2,3,1,3,5,"Scenario A"  
32 334,1,1,3,3,3,1,2,1,2,2,3,2,2,5,"Scenario A"  
33 334,1,2,3,2,1,1,4,2,1,2,3,4,5,3,"Scenario A"  
34 334,2,2,1,2,3,4,2,1,1,3,1,1,4,5,"Scenario B"  
35 334,1,2,1,1,3,2,1,2,1,1,2,4,3,1,"Scenario B"  
36 334,1,2,2,2,2,3,2,2,2,3,1,4,5,1,"Scenario B"  
37 334,2,1,2,1,2,1,4,1,1,1,3,2,5,2,"Scenario A"  
38 334,2,1,1,3,1,2,1,1,2,3,2,4,3,4,"Scenario A"  
39 334,1,1,3,3,1,5,2,2,2,2,1,3,1,3,"Scenario B"  
40 334,1,1,2,2,3,3,3,2,2,3,1,2,4,5,"Scenario B"  
41 334,1,2,2,3,1,5,4,2,1,3,2,4,2,5,"Scenario B"  
42 282,2,1,2,2,3,2,1,1,2,3,2,1,5,4,"Scenario B"  
43 282,1,2,2,3,2,1,5,2,1,1,1,4,3,3,"Scenario B"  
44 282,2,2,1,1,2,4,5,1,2,2,2,3,1,1,"Scenario A"  
45 282,1,1,3,3,1,4,1,2,2,1,2,4,3,2,"Scenario B"  
46 282,2,1,2,1,4,2,3,1,1,3,3,1,5,3,"Scenario B"  
47 282,2,2,3,1,1,1,1,1,1,1,3,3,3,4,"Scenario A"  
48 282,1,2,1,2,3,2,4,2,1,2,2,2,5,3,"Scenario A"  
49 282,2,2,3,3,4,3,5,2,1,2,1,3,5,2,"Scenario B"  
50 282,1,2,1,1,2,4,5,2,1,3,3,4,2,4,"Scenario B"  
51 282,1,1,2,2,2,1,1,2,2,3,1,1,1,2,"Scenario B"  
52 276,1,2,2,2,4,3,2,1,1,1,3,3,4,3,"Scenario B"  
53 276,2,1,3,1,2,5,4,1,2,1,3,4,2,1,"Scenario B"  
54 276,1,1,1,3,1,4,5,2,2,2,2,2,3,5,"Scenario A"  
55 276,2,1,2,2,1,4,1,1,2,2,1,3,1,2,"Scenario B"  
56 276,1,1,3,2,2,2,3,2,2,3,3,1,2,4,"Scenario A"  
57 276,2,1,1,1,4,1,2,1,2,3,2,2,5,3,"Scenario A"  
58 276,2,1,1,2,1,4,4,1,2,3,1,3,3,5,"Scenario A"  
59 276,2,2,2,3,3,5,4,1,2,2,3,4,4,1,"Scenario B"  
60

1  
2  
3 276,1,1,2,1,4,3,5,2,1,1,2,3,5,1,"Scenario B"  
4 276,1,1,3,1,1,1,2,2,2,3,3,2,4,1,"Scenario B"  
5 284,2,1,2,3,1,3,1,1,2,1,1,1,2,2,"Scenario A"  
6 284,1,1,2,1,2,2,3,2,2,3,2,4,1,2,"Scenario A"  
7 284,2,1,3,2,3,5,5,1,2,1,3,4,4,4,"Scenario A"  
8 284,1,2,3,3,1,4,3,2,1,1,1,2,1,4,"Scenario A"  
9 284,1,1,2,1,4,5,5,2,2,1,2,3,4,1,"Scenario B"  
10 284,2,1,2,3,1,1,3,1,2,2,1,2,3,1,"Scenario B"  
11 284,1,2,1,2,1,3,4,2,1,3,3,3,5,1,"Scenario A"  
12 284,2,2,3,2,1,1,5,1,1,2,3,4,2,2,"Scenario B"  
13 284,2,2,3,1,2,4,2,1,1,1,2,2,2,5,"Scenario A"  
14 284,2,2,1,1,3,3,4,1,1,2,3,1,3,5,"Scenario B"  
15 275,1,1,3,3,3,1,2,1,2,2,3,2,2,5,"Scenario B"  
16 275,1,2,3,2,1,1,4,2,1,2,3,4,5,3,"Scenario B"  
17 275,2,2,1,2,3,4,2,1,1,3,1,1,4,5,"Scenario B"  
18 275,1,2,1,1,3,2,1,2,1,1,2,4,3,1,"Scenario A"  
19 275,1,2,2,2,2,3,2,2,2,3,1,4,5,1,"Scenario A"  
20 275,2,1,2,1,2,1,4,1,1,1,3,2,5,2,"Scenario B"  
21 275,2,1,1,3,1,2,1,1,2,3,2,4,3,4,"Scenario A"  
22 275,1,1,3,3,1,5,2,2,2,2,1,3,1,3,"Scenario A"  
23 275,1,1,2,2,3,3,3,2,2,3,1,2,4,5,"Scenario B"  
24 275,1,2,2,3,1,5,4,2,1,3,2,4,2,5,"Scenario A"  
25 274,2,1,2,2,3,2,1,1,2,3,2,1,5,4,"Scenario A"  
26 274,1,2,2,3,2,1,5,2,1,1,1,4,3,3,"Scenario A"  
27 274,2,2,1,1,2,4,5,1,2,2,2,3,1,1,"Scenario A"  
28 274,1,1,3,3,1,4,1,2,2,1,2,4,3,2,"Scenario A"  
29 274,2,1,2,1,4,2,3,1,1,3,3,1,5,3,"Scenario B"  
30 274,2,2,3,1,1,1,1,1,1,1,3,3,3,4,"Scenario A"  
31 274,1,2,1,2,3,2,4,2,1,2,2,2,5,3,"Scenario B"  
32 274,2,2,3,3,4,3,5,2,1,2,1,3,5,2,"Scenario B"  
33 274,1,2,1,1,2,4,5,2,1,3,3,4,2,4,"Scenario A"  
34 274,1,1,2,2,2,1,1,2,2,3,1,1,1,2,"Scenario B"  
35 331,1,2,2,2,4,3,2,1,1,1,3,3,4,3,"Scenario A"  
36 331,2,1,3,1,2,5,4,1,2,1,3,4,2,1,"Scenario B"  
37 331,1,1,1,3,1,4,5,2,2,2,2,2,3,5,"Scenario B"  
38 331,2,1,2,2,1,4,1,1,2,2,1,3,1,2,"Scenario A"  
39 331,1,1,3,2,2,2,3,2,2,3,3,1,2,4,"Scenario A"  
40 331,2,1,1,1,4,1,2,1,2,3,2,2,5,3,"Scenario A"  
41 331,2,1,1,2,1,4,4,1,2,3,1,3,3,5,"Scenario A"  
42 331,2,2,2,3,3,5,4,1,2,2,3,4,4,1,"Scenario B"  
43 331,1,1,2,1,4,3,5,2,1,1,2,3,5,1,"Scenario B"  
44 331,1,1,3,1,1,1,2,2,2,3,3,2,4,1,"Scenario B"  
45 330,2,1,2,3,1,3,1,1,2,1,1,1,2,2,"Scenario A"  
46 330,1,1,2,1,2,2,3,2,2,3,2,4,1,2,"Scenario B"  
47 330,2,1,3,2,3,5,5,1,2,1,3,4,4,4,"Scenario B"  
48 330,1,2,3,3,1,4,3,2,1,1,1,2,1,4,"Scenario B"  
49 330,1,1,2,1,4,5,5,2,2,1,2,3,4,1,"Scenario A"  
50 330,2,1,2,3,1,1,3,1,2,2,1,2,3,1,"Scenario B"  
51 330,1,2,1,2,1,3,4,2,1,3,3,3,5,1,"Scenario B"  
52 330,2,2,3,2,1,1,5,1,1,2,3,4,2,2,"Scenario A"  
53 330,2,2,3,1,2,4,2,1,1,1,2,2,2,5,"Scenario B"  
54 330,2,2,1,1,3,3,4,1,1,2,3,1,3,5,"Scenario B"  
55 281,1,1,3,3,3,1,2,1,2,2,3,2,2,5,"Scenario A"  
56 281,1,2,3,2,1,1,4,2,1,2,3,4,5,3,"Scenario A"  
57 281,2,2,1,2,3,4,2,1,1,3,1,1,4,5,"Scenario B"  
58 281,1,2,1,1,3,2,1,2,1,1,2,4,3,1,"Scenario A"  
59 281,1,2,2,2,2,3,2,2,2,3,1,4,5,1,"Scenario A"  
60

1  
2  
3 281,2,1,2,1,2,1,4,1,1,1,3,2,5,2,"Scenario B"  
4 281,2,1,1,3,1,2,1,1,2,3,2,4,3,4,"Scenario B"  
5 281,1,1,3,3,1,5,2,2,2,2,1,3,1,3,"Scenario A"  
6 281,1,1,2,2,3,3,3,2,2,3,1,2,4,5,"Scenario A"  
7 281,1,2,2,3,1,5,4,2,1,3,2,4,2,5,"Scenario A"  
8 280,2,1,2,2,3,2,1,1,2,3,2,1,5,4,"Scenario B"  
9 280,1,2,2,3,2,1,5,2,1,1,1,4,3,3,"Scenario A"  
10 280,2,2,1,1,2,4,5,1,2,2,2,3,1,1,"Scenario B"  
11 280,1,1,3,3,1,4,1,2,2,1,2,4,3,2,"Scenario B"  
12 280,2,1,2,1,4,2,3,1,1,3,3,1,5,3,"Scenario B"  
13 280,2,2,3,1,1,1,1,1,1,1,1,3,3,3,4,"Scenario A"  
14 280,1,2,1,2,3,2,4,2,1,2,2,2,5,3,"Scenario A"  
15 280,2,2,3,3,4,3,5,2,1,2,1,3,5,2,"Scenario A"  
16 280,1,2,1,1,2,4,5,2,1,3,3,4,2,4,"Scenario A"  
17 280,1,1,2,2,2,1,1,2,2,3,1,1,1,2,"Scenario B"  
18 277,1,2,2,2,4,3,2,1,1,1,3,3,4,3,"Scenario A"  
19 277,2,1,3,1,2,5,4,1,2,1,3,4,2,1,"Scenario A"  
20 277,1,1,1,3,1,4,5,2,2,2,2,2,3,5,"Scenario A"  
21 277,2,1,2,2,1,4,1,1,2,2,1,3,1,2,"Scenario A"  
22 277,1,1,3,2,2,2,3,2,2,3,3,1,2,4,"Scenario B"  
23 277,2,1,1,1,4,1,2,1,2,3,2,2,5,3,"Scenario B"  
24 277,2,1,1,2,1,4,4,1,2,3,1,3,3,5,"Scenario A"  
25 277,2,2,2,3,3,5,4,1,2,2,3,4,4,1,"Scenario B"  
26 277,1,1,2,1,4,3,5,2,1,1,2,3,5,1,"Scenario A"  
27 277,1,1,3,1,1,1,2,2,2,3,3,2,4,1,"Scenario A"  
28 496,2,1,2,3,1,3,1,1,2,1,1,1,2,2,"Scenario A"  
29 496,1,1,2,1,2,2,3,2,2,3,2,4,1,2,"Scenario A"  
30 496,2,1,3,2,3,5,5,1,2,1,3,4,4,4,"Scenario A"  
31 496,1,2,3,3,1,4,3,2,1,1,1,2,1,4,"Scenario B"  
32 496,1,1,2,1,4,5,5,2,2,1,2,3,4,1,"Scenario A"  
33 496,2,1,2,3,1,1,3,1,2,2,1,2,3,1,"Scenario B"  
34 496,1,2,1,2,1,3,4,2,1,3,3,3,5,1,"Scenario B"  
35 496,2,2,3,2,1,1,5,1,1,2,3,4,2,2,"Scenario A"  
36 496,2,2,3,1,2,4,2,1,1,1,2,2,2,5,"Scenario B"  
37 496,2,2,1,1,3,3,4,1,1,2,3,1,3,5,"Scenario B"  
38 492,1,1,3,3,3,1,2,1,2,2,3,2,2,5,"Scenario A"  
39 492,1,2,3,2,1,1,4,2,1,2,3,4,5,3,"Scenario A"  
40 492,2,2,1,2,3,4,2,1,1,3,1,1,4,5,"Scenario B"  
41 492,1,2,1,1,3,2,1,2,1,1,2,4,3,1,"Scenario A"  
42 492,1,2,2,2,2,3,2,2,2,3,1,4,5,1,"Scenario B"  
43 492,2,1,2,1,2,1,4,1,1,1,3,2,5,2,"Scenario B"  
44 492,2,1,1,3,1,2,1,1,2,3,2,4,3,4,"Scenario A"  
45 492,1,1,3,3,1,5,2,2,2,2,1,3,1,3,"Scenario B"  
46 492,1,1,2,2,3,3,3,2,2,3,1,2,4,5,"Scenario A"  
47 492,1,2,2,3,1,5,4,2,1,3,2,4,2,5,"Scenario A"  
48 497,2,1,2,2,3,2,1,1,2,3,2,1,5,4,"Scenario B"  
49 497,1,2,2,3,2,1,5,2,1,1,1,4,3,3,"Scenario A"  
50 497,2,2,1,1,2,4,5,1,2,2,2,3,1,1,"Scenario A"  
51 497,1,1,3,3,1,4,1,2,2,1,2,4,3,2,"Scenario B"  
52 497,2,1,2,1,4,2,3,1,1,3,3,1,5,3,"Scenario A"  
53 497,2,2,3,1,1,1,1,1,1,1,3,3,3,4,"Scenario B"  
54 497,1,2,1,2,3,2,4,2,1,2,2,2,5,3,"Scenario B"  
55 497,2,2,3,3,4,3,5,2,1,2,1,3,5,2,"Scenario B"  
56 497,1,2,1,1,2,4,5,2,1,3,3,4,2,4,"Scenario A"  
57 497,1,1,2,2,2,1,1,2,2,3,1,1,1,2,"Scenario A"  
58 491,1,2,2,2,4,3,2,1,1,1,3,3,4,3,"Scenario A"  
59 491,2,1,3,1,2,5,4,1,2,1,3,4,2,1,"Scenario A"  
60

1  
2  
3 491,1,1,1,3,1,4,5,2,2,2,2,2,3,5,"Scenario B"  
4 491,2,1,2,2,1,4,1,1,2,2,1,3,1,2,"Scenario A"  
5 491,1,1,3,2,2,2,3,2,2,3,3,1,2,4,"Scenario A"  
6 491,2,1,1,1,4,1,2,1,2,3,2,2,5,3,"Scenario B"  
7 491,2,1,1,2,1,4,4,1,2,3,1,3,3,5,"Scenario A"  
8 491,2,2,2,3,3,5,4,1,2,2,3,4,4,1,"Scenario B"  
9 491,1,1,2,1,4,3,5,2,1,1,2,3,5,1,"Scenario B"  
10 491,1,1,3,1,1,1,2,2,2,3,3,2,4,1,"Scenario A"  
11 495,2,1,2,3,1,3,1,1,2,1,1,1,2,2,"Scenario B"  
12 495,1,1,2,1,2,2,3,2,2,3,2,4,1,2,"Scenario B"  
13 495,2,1,3,2,3,5,5,1,2,1,3,4,4,4,"Scenario A"  
14 495,1,2,3,3,1,4,3,2,1,1,1,2,1,4,"Scenario B"  
15 495,1,1,2,1,4,5,5,2,2,1,2,3,4,1,"Scenario A"  
16 495,2,1,2,3,1,1,3,1,2,2,1,2,3,1,"Scenario A"  
17 495,1,2,1,2,1,3,4,2,1,3,3,3,5,1,"Scenario B"  
18 495,2,2,3,2,1,1,5,1,1,2,3,4,2,2,"Scenario A"  
19 495,2,2,3,1,2,4,2,1,1,1,2,2,2,5,"Scenario B"  
20 495,2,2,1,1,3,3,4,1,1,2,3,1,3,5,"Scenario B"  
21 96,1,1,3,3,3,1,2,1,2,2,3,2,2,5,"Scenario A"  
22 96,1,2,3,2,1,1,4,2,1,2,3,4,5,3,"Scenario B"  
23 96,2,2,1,2,3,4,2,1,1,3,1,1,4,5,"Scenario A"  
24 96,1,2,1,1,3,2,1,2,1,1,2,4,3,1,"Scenario B"  
25 96,1,2,2,2,2,3,2,2,2,3,1,4,5,1,"Scenario A"  
26 96,2,1,2,1,2,1,4,1,1,1,3,2,5,2,"Scenario B"  
27 96,2,1,1,3,1,2,1,1,2,3,2,4,3,4,"Scenario B"  
28 96,1,1,3,3,1,5,2,2,2,2,1,3,1,3,"Scenario B"  
29 96,1,1,2,2,3,3,3,2,2,3,1,2,4,5,"Scenario A"  
30 96,1,2,2,3,1,5,4,2,1,3,2,4,2,5,"Scenario A"  
31 97,2,1,2,2,3,2,1,1,2,3,2,1,5,4,"Scenario A"  
32 97,1,2,2,3,2,1,5,2,1,1,1,4,3,3,"Scenario B"  
33 97,2,2,1,1,2,4,5,1,2,2,2,3,1,1,"Scenario B"  
34 97,1,1,3,3,1,4,1,2,2,1,2,4,3,2,"Scenario A"  
35 97,2,1,2,1,4,2,3,1,1,3,3,1,5,3,"Scenario B"  
36 97,2,2,3,1,1,1,1,1,1,1,3,3,3,4,"Scenario A"  
37 97,1,2,1,2,3,2,4,2,1,2,2,2,5,3,"Scenario B"  
38 97,2,2,3,3,4,3,5,2,1,2,1,3,5,2,"Scenario B"  
39 97,1,2,1,1,2,4,5,2,1,3,3,4,2,4,"Scenario B"  
40 97,1,1,2,2,2,1,1,2,2,3,1,1,1,2,"Scenario A"  
41 98,1,2,2,2,4,3,2,1,1,1,3,3,4,3,"Scenario A"  
42 98,2,1,3,1,2,5,4,1,2,1,3,4,2,1,"Scenario B"  
43 98,1,1,1,3,1,4,5,2,2,2,2,2,3,5,"Scenario B"  
44 98,2,1,2,2,1,4,1,1,2,2,1,3,1,2,"Scenario A"  
45 98,1,1,3,2,2,2,3,2,2,3,3,1,2,4,"Scenario B"  
46 98,2,1,1,1,4,1,2,1,2,3,2,2,5,3,"Scenario B"  
47 98,2,1,1,2,1,4,4,1,2,3,1,3,3,5,"Scenario B"  
48 98,2,2,2,3,3,5,4,1,2,2,3,4,4,1,"Scenario A"  
49 98,1,1,2,1,4,3,5,2,1,1,2,3,5,1,"Scenario A"  
50 98,1,1,3,1,1,1,2,2,2,3,3,2,4,1,"Scenario B"  
51 99,2,1,2,3,1,3,1,1,2,1,1,1,2,2,"Scenario A"  
52 99,1,1,2,1,2,2,3,2,2,3,2,4,1,2,"Scenario B"  
53 99,2,1,3,2,3,5,5,1,2,1,3,4,4,4,"Scenario A"  
54 99,1,2,3,3,1,4,3,2,1,1,1,2,1,4,"Scenario A"  
55 99,1,1,2,1,4,5,5,2,2,1,2,3,4,1,"Scenario B"  
56 99,2,1,2,3,1,1,3,1,2,2,1,2,3,1,"Scenario B"  
57 99,1,2,1,2,1,3,4,2,1,3,3,3,5,1,"Scenario B"  
58 99,2,2,3,2,1,1,5,1,1,2,3,4,2,2,"Scenario A"  
59 99,2,2,3,1,2,4,2,1,1,1,2,2,2,5,"Scenario A"  
60



1  
2  
3 99,2,2,1,1,3,3,4,1,1,2,3,1,3,5,"Scenario B"  
4 100,1,1,3,3,3,1,2,1,2,2,3,2,2,5,"Scenario B"  
5 100,1,2,3,2,1,1,4,2,1,2,3,4,5,3,"Scenario A"  
6 100,2,2,1,2,3,4,2,1,1,3,1,1,4,5,"Scenario A"  
7 100,1,2,1,1,3,2,1,2,1,1,2,4,3,1,"Scenario B"  
8 100,1,2,2,2,2,3,2,2,2,3,1,4,5,1,"Scenario B"  
9 100,2,1,2,1,2,1,4,1,1,1,3,2,5,2,"Scenario B"  
10 100,2,1,1,3,1,2,1,1,2,3,2,4,3,4,"Scenario A"  
11 100,1,1,3,3,1,5,2,2,2,2,1,3,1,3,"Scenario A"  
12 100,1,1,2,2,3,3,3,2,2,3,1,2,4,5,"Scenario A"  
13 100,1,2,2,3,1,5,4,2,1,3,2,4,2,5,"Scenario A"  
14 101,2,1,2,2,3,2,1,1,2,3,2,1,5,4,"Scenario A"  
15 101,1,2,2,3,2,1,5,2,1,1,1,4,3,3,"Scenario A"  
16 101,2,2,1,1,2,4,5,1,2,2,2,3,1,1,"Scenario B"  
17 101,1,1,3,3,1,4,1,2,2,1,2,4,3,2,"Scenario B"  
18 101,2,1,2,1,4,2,3,1,1,3,3,1,5,3,"Scenario A"  
19 101,2,2,3,1,1,1,1,1,1,1,3,3,3,4,"Scenario A"  
20 101,1,2,1,2,3,2,4,2,1,2,2,2,5,3,"Scenario A"  
21 101,2,2,3,3,4,3,5,2,1,2,1,3,5,2,"Scenario A"  
22 101,1,2,1,1,2,4,5,2,1,3,3,4,2,4,"Scenario B"  
23 101,1,1,2,2,2,1,1,2,2,3,1,1,1,2,"Scenario B"  
24 102,1,2,2,2,4,3,2,1,1,1,3,3,4,3,"Scenario A"  
25 102,2,1,3,1,2,5,4,1,2,1,3,4,2,1,"Scenario A"  
26 102,1,1,1,3,1,4,5,2,2,2,2,2,3,5,"Scenario A"  
27 102,2,1,2,2,1,4,1,1,2,2,1,3,1,2,"Scenario A"  
28 102,1,1,3,2,2,2,3,2,2,3,3,1,2,4,"Scenario A"  
29 102,2,1,1,1,4,1,2,1,2,3,2,2,5,3,"Scenario A"  
30 102,2,1,1,2,1,4,4,1,2,3,1,3,3,5,"Scenario A"  
31 102,2,2,2,3,3,5,4,1,2,2,3,4,4,1,"Scenario B"  
32 102,1,1,2,1,4,3,5,2,1,1,2,3,5,1,"Scenario B"  
33 102,1,1,3,1,1,1,2,2,2,3,3,2,4,1,"Scenario B"  
34 103,2,1,2,3,1,3,1,1,2,1,1,1,2,2,"Scenario A"  
35 103,1,1,2,1,2,2,3,2,2,3,2,4,1,2,"Scenario B"  
36 103,2,1,3,2,3,5,5,1,2,1,3,4,4,4,"Scenario A"  
37 103,1,2,3,3,1,4,3,2,1,1,1,2,1,4,"Scenario A"  
38 103,1,1,2,1,4,5,5,2,2,1,2,3,4,1,"Scenario B"  
39 103,2,1,2,3,1,1,3,1,2,2,1,2,3,1,"Scenario B"  
40 103,1,2,1,2,1,3,4,2,1,3,3,3,5,1,"Scenario A"  
41 103,2,2,3,2,1,1,5,1,1,2,3,4,2,2,"Scenario A"  
42 103,2,2,3,1,2,4,2,1,1,1,2,2,2,5,"Scenario A"  
43 103,2,2,1,1,3,3,4,1,1,2,3,1,3,5,"Scenario A"  
44 104,1,1,3,3,3,1,2,1,2,2,3,2,2,5,"Scenario B"  
45 104,1,2,3,2,1,1,4,2,1,2,3,4,5,3,"Scenario A"  
46 104,2,2,1,2,3,4,2,1,1,3,1,1,4,5,"Scenario A"  
47 104,1,2,1,1,3,2,1,2,1,1,2,4,3,1,"Scenario A"  
48 104,1,2,2,2,2,3,2,2,2,3,1,4,5,1,"Scenario B"  
49 104,2,1,2,1,2,1,4,1,1,1,3,2,5,2,"Scenario B"  
50 104,2,1,1,3,1,2,1,1,2,3,2,4,3,4,"Scenario A"  
51 104,1,1,3,3,1,5,2,2,2,2,1,3,1,3,"Scenario A"  
52 104,1,1,2,2,3,3,3,2,2,3,1,2,4,5,"Scenario A"  
53 104,1,2,2,3,1,5,4,2,1,3,2,4,2,5,"Scenario A"  
54 105,2,1,2,2,3,2,1,1,2,3,2,1,5,4,"Scenario A"  
55 105,1,2,2,3,2,1,5,2,1,1,1,4,3,3,"Scenario B"  
56 105,2,2,1,1,2,4,5,1,2,2,2,3,1,1,"Scenario B"  
57 105,1,1,3,3,1,4,1,2,2,1,2,4,3,2,"Scenario A"  
58 105,2,1,2,1,4,2,3,1,1,3,3,1,5,3,"Scenario A"  
59 105,2,2,3,1,1,1,1,1,1,1,3,3,3,4,"Scenario A"  
60

1  
2  
3 105,1,2,1,2,3,2,4,2,1,2,2,2,5,3,"Scenario A"  
4 105,2,2,3,3,4,3,5,2,1,2,1,3,5,2,"Scenario A"  
5 105,1,2,1,1,2,4,5,2,1,3,3,4,2,4,"Scenario B"  
6 105,1,1,2,2,2,1,1,2,2,3,1,1,1,2,"Scenario A"  
7 445,1,2,2,2,4,3,2,1,1,1,3,3,4,3,"Scenario A"  
8 445,2,1,3,1,2,5,4,1,2,1,3,4,2,1,"Scenario B"  
9 445,1,1,1,3,1,4,5,2,2,2,2,2,3,5,"Scenario B"  
10 445,2,1,2,2,1,4,1,1,2,2,1,3,1,2,"Scenario B"  
11 445,1,1,3,2,2,2,3,2,2,3,3,1,2,4,"Scenario B"  
12 445,2,1,1,1,4,1,2,1,2,3,2,2,5,3,"Scenario B"  
13 445,2,1,1,2,1,4,4,1,2,3,1,3,3,5,"Scenario B"  
14 445,2,2,2,3,3,5,4,1,2,2,3,4,4,1,"Scenario B"  
15 445,1,1,2,1,4,3,5,2,1,1,2,3,5,1,"Scenario A"  
16 445,1,1,3,1,1,1,2,2,2,3,3,2,4,1,"Scenario A"  
17 478,2,1,2,3,1,3,1,1,2,1,1,1,2,2,"Scenario A"  
18 478,1,1,2,1,2,2,3,2,2,3,2,4,1,2,"Scenario B"  
19 478,2,1,3,2,3,5,5,1,2,1,3,4,4,4,"Scenario B"  
20 478,1,2,3,3,1,4,3,2,1,1,1,2,1,4,"Scenario A"  
21 478,1,1,2,1,4,5,5,2,2,1,2,3,4,1,"Scenario B"  
22 478,2,1,2,3,1,1,3,1,2,2,1,2,3,1,"Scenario B"  
23 478,1,2,1,2,1,3,4,2,1,3,3,3,5,1,"Scenario A"  
24 478,2,2,3,2,1,1,5,1,1,2,3,4,2,2,"Scenario B"  
25 478,2,2,3,1,2,4,2,1,1,1,2,2,2,5,"Scenario A"  
26 478,2,2,1,1,3,3,4,1,1,2,3,1,3,5,"Scenario A"  
27 444,1,1,3,3,3,1,2,1,2,2,3,2,2,5,"Scenario A"  
28 444,1,2,3,2,1,1,4,2,1,2,3,4,5,3,"Scenario A"  
29 444,2,2,1,2,3,4,2,1,1,3,1,1,4,5,"Scenario A"  
30 444,1,2,1,1,3,2,1,2,1,1,2,4,3,1,"Scenario A"  
31 444,1,2,2,2,2,3,2,2,2,3,1,4,5,1,"Scenario A"  
32 444,2,1,2,1,2,1,4,1,1,1,1,3,2,5,2,"Scenario A"  
33 444,2,1,1,3,1,2,1,1,2,3,2,4,3,4,"Scenario A"  
34 444,1,1,3,3,1,5,2,2,2,2,1,3,1,3,"Scenario A"  
35 444,1,1,2,2,3,3,3,2,2,3,1,2,4,5,"Scenario A"  
36 444,1,2,2,3,1,5,4,2,1,3,2,4,2,5,"Scenario B"  
37 442,2,1,2,2,3,2,1,1,2,3,2,1,5,4,"Scenario A"  
38 442,1,2,2,3,2,1,5,2,1,1,1,4,3,3,"Scenario B"  
39 442,2,2,1,1,2,4,5,1,2,2,2,3,1,1,"Scenario B"  
40 442,1,1,3,3,1,4,1,2,2,1,2,4,3,2,"Scenario B"  
41 442,2,1,2,1,4,2,3,1,1,3,3,1,5,3,"Scenario A"  
42 442,2,2,3,1,1,1,1,1,1,1,3,3,3,4,"Scenario A"  
43 442,1,2,1,2,3,2,4,2,1,2,2,2,5,3,"Scenario A"  
44 442,2,2,3,3,4,3,5,2,1,2,1,3,5,2,"Scenario A"  
45 442,1,2,1,1,2,4,5,2,1,3,3,4,2,4,"Scenario B"  
46 442,1,1,2,2,2,1,1,2,2,3,1,1,1,2,"Scenario A"  
47 452,1,2,2,2,4,3,2,1,1,1,3,3,4,3,"Scenario A"  
48 452,2,1,3,1,2,5,4,1,2,1,3,4,2,1,"Scenario B"  
49 452,1,1,1,3,1,4,5,2,2,2,2,2,3,5,"Scenario B"  
50 452,2,1,2,2,1,4,1,1,2,2,1,3,1,2,"Scenario A"  
51 452,1,1,3,2,2,2,3,2,2,3,3,1,2,4,"Scenario A"  
52 452,2,1,1,1,4,1,2,1,2,3,2,2,5,3,"Scenario A"  
53 452,2,1,1,2,1,4,4,1,2,3,1,3,3,5,"Scenario A"  
54 452,2,2,2,3,3,5,4,1,2,2,3,4,4,1,"Scenario B"  
55 452,1,1,2,1,4,3,5,2,1,1,2,3,5,1,"Scenario B"  
56 452,1,1,3,1,1,1,2,2,2,3,3,2,4,1,"Scenario B"  
57 262,2,1,2,3,1,3,1,1,2,1,1,1,2,2,"Scenario A"  
58 262,1,1,2,1,2,2,3,2,2,3,2,4,1,2,"Scenario B"  
59 262,2,1,3,2,3,5,5,1,2,1,3,4,4,4,"Scenario B"  
60

1  
2  
3 262,1,2,3,3,1,4,3,2,1,1,1,2,1,4,"Scenario A"  
4 262,1,1,2,1,4,5,5,2,2,1,2,3,4,1,"Scenario B"  
5 262,2,1,2,3,1,1,3,1,2,2,1,2,3,1,"Scenario B"  
6 262,1,2,1,2,1,3,4,2,1,3,3,3,5,1,"Scenario B"  
7 262,2,2,3,2,1,1,5,1,1,2,3,4,2,2,"Scenario B"  
8 262,2,2,3,1,2,4,2,1,1,1,2,2,2,5,"Scenario A"  
9 262,2,2,1,1,3,3,4,1,1,2,3,1,3,5,"Scenario A"  
10 464,1,1,3,3,3,1,2,1,2,2,3,2,2,5,"Scenario A"  
11 464,1,2,3,2,1,1,4,2,1,2,3,4,5,3,"Scenario A"  
12 464,2,2,1,2,3,4,2,1,1,3,1,1,4,5,"Scenario B"  
13 464,1,2,1,1,3,2,1,2,1,1,2,4,3,1,"Scenario B"  
14 464,1,2,2,2,2,3,2,2,2,3,1,4,5,1,"Scenario B"  
15 464,2,1,2,1,2,1,4,1,1,1,3,2,5,2,"Scenario B"  
16 464,2,1,1,3,1,2,1,1,2,3,2,4,3,4,"Scenario B"  
17 464,1,1,2,2,3,3,3,2,2,3,1,2,4,5,"Scenario B"  
18 464,1,2,2,3,1,5,4,2,1,3,2,4,2,5,"Scenario A"  
19 271,2,1,2,2,3,2,1,1,2,3,2,1,5,4,"Scenario A"  
20 271,1,2,2,3,2,1,5,2,1,1,1,4,3,3,"Scenario B"  
21 271,2,2,1,1,2,4,5,1,2,2,2,3,1,1,"Scenario B"  
22 271,1,1,3,3,1,4,1,2,2,1,2,4,3,2,"Scenario A"  
23 271,2,1,2,1,4,2,3,1,1,3,3,1,5,3,"Scenario B"  
24 271,2,2,3,1,1,1,1,1,1,1,3,3,3,4,"Scenario A"  
25 271,1,2,1,2,3,2,4,2,1,2,2,2,5,3,"Scenario B"  
26 271,2,2,3,3,4,3,5,2,1,2,1,3,5,2,"Scenario B"  
27 271,1,2,1,1,2,4,5,2,1,3,3,4,2,4,"Scenario B"  
28 271,1,1,2,2,2,1,1,2,2,3,1,1,1,2,"Scenario A"  
29 259,1,2,2,2,4,3,2,1,1,1,3,3,4,3,"Scenario A"  
30 259,2,1,3,1,2,5,4,1,2,1,3,4,2,1,"Scenario B"  
31 259,1,1,1,3,1,4,5,2,2,2,2,2,3,5,"Scenario A"  
32 259,2,1,2,2,1,4,1,1,2,2,1,3,1,2,"Scenario A"  
33 259,1,1,3,2,2,2,3,2,2,3,3,1,2,4,"Scenario B"  
34 259,2,1,1,1,4,1,2,1,2,3,2,2,5,3,"Scenario B"  
35 259,2,1,1,2,1,4,4,1,2,3,1,3,3,5,"Scenario B"  
36 259,2,2,2,3,3,5,4,1,2,2,3,4,4,1,"Scenario B"  
37 259,1,1,2,1,4,3,5,2,1,1,2,3,5,1,"Scenario B"  
38 259,1,1,3,1,1,1,2,2,2,3,3,2,4,1,"Scenario B"  
39 265,2,1,2,3,1,3,1,1,2,1,1,1,2,2,"Scenario A"  
40 265,1,1,2,1,2,2,3,2,2,3,2,4,1,2,"Scenario B"  
41 265,2,1,3,2,3,5,5,1,2,1,3,4,4,4,"Scenario B"  
42 265,1,2,3,3,1,4,3,2,1,1,1,2,1,4,"Scenario B"  
43 265,1,1,2,1,4,5,5,2,2,1,2,3,4,1,"Scenario A"  
44 265,2,1,2,3,1,1,3,1,2,2,1,2,3,1,"Scenario A"  
45 265,1,2,1,2,1,3,4,2,1,3,3,3,5,1,"Scenario B"  
46 265,2,2,3,2,1,1,5,1,1,2,3,4,2,2,"Scenario B"  
47 265,2,2,3,1,2,4,2,1,1,1,2,2,2,5,"Scenario A"  
48 265,2,2,1,1,3,3,4,1,1,2,3,1,3,5,"Scenario A"  
49 287,1,1,3,3,3,1,2,1,2,2,3,2,2,5,"Scenario A"  
50 287,1,2,3,2,1,1,4,2,1,2,3,4,5,3,"Scenario B"  
51 287,2,2,1,2,3,4,2,1,1,3,1,1,4,5,"Scenario B"  
52 287,1,2,1,1,3,2,1,2,1,1,2,4,3,1,"Scenario B"  
53 287,1,2,2,2,2,3,2,2,2,3,1,4,5,1,"Scenario B"  
54 287,2,1,2,1,2,1,4,1,1,1,3,2,5,2,"Scenario B"  
55 287,2,1,1,3,1,2,1,1,2,3,2,4,3,4,"Scenario A"  
56 287,1,1,3,3,1,5,2,2,2,2,1,3,1,3,"Scenario A"  
57 287,1,1,2,2,3,3,3,2,2,3,1,2,4,5,"Scenario B"  
58 287,1,2,2,3,1,5,4,2,1,3,2,4,2,5,"Scenario B"  
59 459,2,1,2,2,3,2,1,1,2,3,2,1,5,4,"Scenario B"  
60

1  
2  
3 459,1,2,2,3,2,1,5,2,1,1,1,4,3,3,"Scenario A"  
4 459,2,2,1,1,2,4,5,1,2,2,2,3,1,1,"Scenario B"  
5 459,1,1,3,3,1,4,1,2,2,1,2,4,3,2,"Scenario A"  
6 459,2,1,2,1,4,2,3,1,1,3,3,1,5,3,"Scenario B"  
7 459,2,2,3,1,1,1,1,1,1,1,3,3,3,4,"Scenario A"  
8 459,1,2,1,2,3,2,4,2,1,2,2,2,5,3,"Scenario B"  
9 459,2,2,3,3,4,3,5,2,1,2,1,3,5,2,"Scenario A"  
10 459,1,2,1,1,2,4,5,2,1,3,3,4,2,4,"Scenario B"  
11 459,1,1,2,2,2,1,1,2,2,3,1,1,1,2,"Scenario B"  
12 288,1,2,2,2,4,3,2,1,1,1,3,3,4,3,"Scenario A"  
13 288,2,1,3,1,2,5,4,1,2,1,3,4,2,1,"Scenario B"  
14 288,1,1,1,3,1,4,5,2,2,2,2,2,3,5,"Scenario A"  
15 288,2,1,2,2,1,4,1,1,2,2,1,3,1,2,"Scenario A"  
16 288,1,1,3,2,2,2,3,2,2,3,3,1,2,4,"Scenario A"  
17 288,2,1,1,1,4,1,2,1,2,3,2,2,5,3,"Scenario A"  
18 288,2,1,1,2,1,4,4,1,2,3,1,3,3,5,"Scenario A"  
19 288,2,2,2,3,3,5,4,1,2,2,3,4,4,1,"Scenario B"  
20 288,1,1,2,1,4,3,5,2,1,1,2,3,5,1,"Scenario B"  
21 288,1,1,3,1,1,1,2,2,2,3,3,2,4,1,"Scenario B"  
22 266,2,1,2,3,1,3,1,1,2,1,1,1,2,2,"Scenario A"  
23 266,1,1,2,1,2,2,3,2,2,3,2,4,1,2,"Scenario B"  
24 266,2,1,3,2,3,5,5,1,2,1,3,4,4,4,"Scenario A"  
25 266,1,2,3,3,1,4,3,2,1,1,1,2,1,4,"Scenario A"  
26 266,1,1,2,1,4,5,5,2,2,1,2,3,4,1,"Scenario B"  
27 266,2,1,2,3,1,1,3,1,2,2,1,2,3,1,"Scenario B"  
28 266,1,2,1,2,1,3,4,2,1,3,3,3,5,1,"Scenario B"  
29 266,2,2,3,2,1,1,5,1,1,2,3,4,2,2,"Scenario B"  
30 266,2,2,3,1,2,4,2,1,1,1,2,2,2,5,"Scenario A"  
31 266,2,2,1,1,3,3,4,1,1,2,3,1,3,5,"Scenario A"  
32 260,1,1,3,3,3,1,2,1,2,2,3,2,2,5,"Scenario A"  
33 260,1,2,3,2,1,1,4,2,1,2,3,4,5,3,"Scenario B"  
34 260,2,2,1,2,3,4,2,1,1,3,1,1,4,5,"Scenario A"  
35 260,1,2,1,1,3,2,1,2,1,1,2,4,3,1,"Scenario A"  
36 260,1,2,2,2,2,3,2,2,2,3,1,4,5,1,"Scenario B"  
37 260,2,1,2,1,2,1,4,1,1,1,3,2,5,2,"Scenario B"  
38 260,2,1,1,3,1,2,1,1,2,3,2,4,3,4,"Scenario B"  
39 260,1,1,3,3,1,5,2,2,2,2,1,3,1,3,"Scenario A"  
40 260,1,1,2,2,3,3,3,2,2,3,1,2,4,5,"Scenario A"  
41 260,1,2,2,3,1,5,4,2,1,3,2,4,2,5,"Scenario A"  
42 418,2,1,2,2,3,2,1,1,2,3,2,1,5,4,"Scenario B"  
43 418,1,2,2,3,2,1,5,2,1,1,1,4,3,3,"Scenario B"  
44 418,2,2,1,1,2,4,5,1,2,2,2,3,1,1,"Scenario A"  
45 418,1,1,3,3,1,4,1,2,2,1,2,4,3,2,"Scenario A"  
46 418,2,1,2,1,4,2,3,1,1,3,3,1,5,3,"Scenario B"  
47 418,2,2,3,1,1,1,1,1,1,1,3,3,3,4,"Scenario A"  
48 418,1,2,1,2,3,2,4,2,1,2,2,2,5,3,"Scenario B"  
49 418,2,2,3,3,4,3,5,2,1,2,1,3,5,2,"Scenario B"  
50 418,1,2,1,1,2,4,5,2,1,3,3,4,2,4,"Scenario B"  
51 418,1,1,2,2,2,1,1,2,2,3,1,1,1,2,"Scenario A"  
52 460,1,2,2,2,4,3,2,1,1,1,3,3,4,3,"Scenario A"  
53 460,2,1,3,1,2,5,4,1,2,1,3,4,2,1,"Scenario B"  
54 460,1,1,1,3,1,4,5,2,2,2,2,2,3,5,"Scenario B"  
55 460,2,1,2,2,1,4,1,1,2,2,1,3,1,2,"Scenario A"  
56 460,1,1,3,2,2,2,3,2,2,3,3,1,2,4,"Scenario A"  
57 460,2,1,1,1,4,1,2,1,2,3,2,2,5,3,"Scenario A"  
58 460,2,1,1,2,1,4,4,1,2,3,1,3,3,5,"Scenario B"  
59 460,2,2,2,3,3,5,4,1,2,2,3,4,4,1,"Scenario B"  
60

1  
2  
3 460,1,1,2,1,4,3,5,2,1,1,2,3,5,1,"Scenario B"  
4 460,1,1,3,1,1,1,2,2,2,3,3,2,4,1,"Scenario B"  
5 263,2,1,2,3,1,3,1,1,2,1,1,1,2,2,"Scenario A"  
6 263,1,1,2,1,2,2,3,2,2,3,2,4,1,2,"Scenario B"  
7 263,2,1,3,2,3,5,5,1,2,1,3,4,4,4,"Scenario A"  
8 263,1,2,3,3,1,4,3,2,1,1,1,2,1,4,"Scenario A"  
9 263,1,1,2,1,4,5,5,2,2,1,2,3,4,1,"Scenario B"  
10 263,2,1,2,3,1,1,3,1,2,2,1,2,3,1,"Scenario B"  
11 263,1,2,1,2,1,3,4,2,1,3,3,3,5,1,"Scenario B"  
12 263,2,2,3,2,1,1,5,1,1,2,3,4,2,2,"Scenario B"  
13 263,2,2,3,1,2,4,2,1,1,1,2,2,2,5,"Scenario A"  
14 263,2,2,1,1,3,3,4,1,1,2,3,1,3,5,"Scenario B"  
15 302,1,1,3,3,3,1,2,1,2,2,3,2,2,5,"Scenario A"  
16 302,1,2,3,2,1,1,4,2,1,2,3,4,5,3,"Scenario A"  
17 302,2,2,1,2,3,4,2,1,1,3,1,1,4,5,"Scenario B"  
18 302,1,2,1,1,3,2,1,2,1,1,2,4,3,1,"Scenario A"  
19 302,1,2,2,2,2,3,2,2,2,3,1,4,5,1,"Scenario B"  
20 302,2,1,2,1,2,1,4,1,1,1,3,2,5,2,"Scenario B"  
21 302,2,1,1,3,1,2,1,1,2,3,2,4,3,4,"Scenario A"  
22 302,1,1,3,3,1,5,2,2,2,2,1,3,1,3,"Scenario A"  
23 302,1,1,2,2,3,3,3,2,2,3,1,2,4,5,"Scenario B"  
24 302,1,2,2,3,1,5,4,2,1,3,2,4,2,5,"Scenario A"  
25 264,2,1,2,2,3,2,1,1,2,3,2,1,5,4,"Scenario A"  
26 264,1,2,2,3,2,1,5,2,1,1,1,4,3,3,"Scenario B"  
27 264,2,2,1,1,2,4,5,1,2,2,2,3,1,1,"Scenario B"  
28 264,1,1,3,3,1,4,1,2,2,1,2,4,3,2,"Scenario A"  
29 264,2,1,2,1,4,2,3,1,1,3,3,1,5,3,"Scenario B"  
30 264,2,2,3,1,1,1,1,1,1,1,3,3,3,4,"Scenario A"  
31 264,1,2,1,2,3,2,4,2,1,2,2,2,5,3,"Scenario B"  
32 264,2,2,3,3,4,3,5,2,1,2,1,3,5,2,"Scenario B"  
33 264,1,2,1,1,2,4,5,2,1,3,3,4,2,4,"Scenario B"  
34 264,1,1,2,2,2,1,1,2,2,3,1,1,1,2,"Scenario A"  
35 261,1,2,2,2,4,3,2,1,1,1,3,3,4,3,"Scenario A"  
36 261,2,1,3,1,2,5,4,1,2,1,3,4,2,1,"Scenario A"  
37 261,1,1,1,3,1,4,5,2,2,2,2,2,3,5,"Scenario A"  
38 261,2,1,2,2,1,4,1,1,2,2,1,3,1,2,"Scenario A"  
39 261,1,1,3,2,2,2,3,2,2,3,3,1,2,4,"Scenario B"  
40 261,2,1,1,1,4,1,2,1,2,3,2,2,5,3,"Scenario A"  
41 261,2,1,1,2,1,4,4,1,2,3,1,3,3,5,"Scenario B"  
42 261,2,2,2,3,3,5,4,1,2,2,3,4,4,1,"Scenario B"  
43 261,1,1,2,1,4,3,5,2,1,1,2,3,5,1,"Scenario B"  
44 261,1,1,3,1,1,1,2,2,2,3,3,2,4,1,"Scenario B"  
45 285,2,1,2,3,1,3,1,1,2,1,1,1,2,2,"Scenario A"  
46 285,1,1,2,1,2,2,3,2,2,3,2,4,1,2,"Scenario B"  
47 285,2,1,3,2,3,5,5,1,2,1,3,4,4,4,"Scenario A"  
48 285,1,2,3,3,1,4,3,2,1,1,1,2,1,4,"Scenario A"  
49 285,1,1,2,1,4,5,5,2,2,1,2,3,4,1,"Scenario A"  
50 285,2,1,2,3,1,1,3,1,2,2,1,2,3,1,"Scenario A"  
51 285,1,2,1,2,1,3,4,2,1,3,3,3,5,1,"Scenario B"  
52 285,2,2,3,2,1,1,5,1,1,2,3,4,2,2,"Scenario A"  
53 285,2,2,3,1,2,4,2,1,1,1,2,2,2,5,"Scenario A"  
54 285,2,2,1,1,3,3,4,1,1,2,3,1,3,5,"Scenario B"  
55 296,1,1,3,3,3,1,2,1,2,2,3,2,2,5,"Scenario A"  
56 296,1,2,3,2,1,1,4,2,1,2,3,4,5,3,"Scenario A"  
57 296,2,2,1,2,3,4,2,1,1,3,1,1,4,5,"Scenario B"  
58 296,1,2,1,1,3,2,1,2,1,1,2,4,3,1,"Scenario B"  
59 296,1,2,2,2,2,3,2,2,2,3,1,4,5,1,"Scenario B"  
60

1  
2  
3 296,2,1,2,1,2,1,4,1,1,1,3,2,5,2,"Scenario B"  
4 296,2,1,1,3,1,2,1,1,2,3,2,4,3,4,"Scenario A"  
5 296,1,1,3,3,1,5,2,2,2,2,1,3,1,3,"Scenario A"  
6 296,1,1,2,2,3,3,3,2,2,3,1,2,4,5,"Scenario B"  
7 296,1,2,2,3,1,5,4,2,1,3,2,4,2,5,"Scenario A"  
8 293,2,1,2,2,3,2,1,1,2,3,2,1,5,4,"Scenario A"  
9 293,1,2,2,3,2,1,5,2,1,1,1,4,3,3,"Scenario A"  
10 293,2,2,1,1,2,4,5,1,2,2,2,3,1,1,"Scenario B"  
11 293,1,1,3,3,1,4,1,2,2,1,2,4,3,2,"Scenario A"  
12 293,2,1,2,1,4,2,3,1,1,3,3,1,5,3,"Scenario A"  
13 293,2,2,3,1,1,1,1,1,1,1,3,3,3,4,"Scenario B"  
14 293,1,2,1,2,3,2,4,2,1,2,2,2,5,3,"Scenario A"  
15 293,2,2,3,3,4,3,5,2,1,2,1,3,5,2,"Scenario B"  
16 293,1,2,1,1,2,4,5,2,1,3,3,4,2,4,"Scenario A"  
17 293,1,1,2,2,2,1,1,2,2,3,1,1,1,2,"Scenario B"  
18 286,1,2,2,2,4,3,2,1,1,1,3,3,4,3,"Scenario A"  
19 286,2,1,3,1,2,5,4,1,2,1,3,4,2,1,"Scenario B"  
20 286,1,1,1,3,1,4,5,2,2,2,2,2,3,5,"Scenario A"  
21 286,2,1,2,2,1,4,1,1,2,2,1,3,1,2,"Scenario A"  
22 286,1,1,3,2,2,2,3,2,2,3,3,1,2,4,"Scenario A"  
23 286,2,1,1,1,4,1,2,1,2,3,2,2,5,3,"Scenario B"  
24 286,2,1,1,2,1,4,4,1,2,3,1,3,3,5,"Scenario A"  
25 286,2,2,2,3,3,5,4,1,2,2,3,4,4,1,"Scenario B"  
26 286,1,1,2,1,4,3,5,2,1,1,2,3,5,1,"Scenario B"  
27 286,1,1,3,1,1,1,2,2,2,3,3,2,4,1,"Scenario B"  
28 394,2,1,2,3,1,3,1,1,2,1,1,1,2,2,"Scenario A"  
29 394,1,1,2,1,2,2,3,2,2,3,2,4,1,2,"Scenario B"  
30 394,2,1,3,2,3,5,5,1,2,1,3,4,4,4,"Scenario B"  
31 394,1,2,3,3,1,4,3,2,1,1,1,2,1,4,"Scenario A"  
32 394,1,1,2,1,4,5,5,2,2,1,2,3,4,1,"Scenario A"  
33 394,2,1,2,3,1,1,3,1,2,2,1,2,3,1,"Scenario A"  
34 394,1,2,1,2,1,3,4,2,1,3,3,3,5,1,"Scenario B"  
35 394,2,2,3,2,1,1,5,1,1,2,3,4,2,2,"Scenario A"  
36 394,2,2,3,1,2,4,2,1,1,1,2,2,2,5,"Scenario A"  
37 394,2,2,1,1,3,3,4,1,1,2,3,1,3,5,"Scenario B"  
38 396,1,1,3,3,3,1,2,1,2,2,3,2,2,5,"Scenario B"  
39 396,1,2,3,2,1,1,4,2,1,2,3,4,5,3,"Scenario A"  
40 396,2,2,1,2,3,4,2,1,1,3,1,1,4,5,"Scenario B"  
41 396,1,2,1,1,3,2,1,2,1,1,2,4,3,1,"Scenario A"  
42 396,1,2,2,2,2,3,2,2,2,3,1,4,5,1,"Scenario A"  
43 396,2,1,2,1,2,1,4,1,1,1,3,2,5,2,"Scenario B"  
44 396,2,1,1,3,1,2,1,1,2,3,2,4,3,4,"Scenario A"  
45 396,1,1,3,3,1,5,2,2,2,2,1,3,1,3,"Scenario A"  
46 396,1,1,2,2,3,3,3,2,2,3,1,2,4,5,"Scenario A"  
47 396,1,2,2,3,1,5,4,2,1,3,2,4,2,5,"Scenario A"  
48 498,2,1,2,2,3,2,1,1,2,3,2,1,5,4,"Scenario A"  
49 498,1,2,2,3,2,1,5,2,1,1,1,4,3,3,"Scenario B"  
50 498,2,2,1,1,2,4,5,1,2,2,2,3,1,1,"Scenario A"  
51 498,1,1,3,3,1,4,1,2,2,1,2,4,3,2,"Scenario B"  
52 498,2,1,2,1,4,2,3,1,1,3,3,1,5,3,"Scenario B"  
53 498,2,2,3,1,1,1,1,1,1,1,3,3,3,4,"Scenario B"  
54 498,1,2,1,2,3,2,4,2,1,2,2,2,5,3,"Scenario A"  
55 498,2,2,3,3,4,3,5,2,1,2,1,3,5,2,"Scenario B"  
56 498,1,2,1,1,2,4,5,2,1,3,3,4,2,4,"Scenario A"  
57 498,1,1,2,2,2,1,1,2,2,3,1,1,1,2,"Scenario B"  
58 294,1,2,2,2,4,3,2,1,1,1,3,3,4,3,"Scenario A"  
59 294,2,1,3,1,2,5,4,1,2,1,3,4,2,1,"Scenario A"  
60

1  
2  
3 294,1,1,1,3,1,4,5,2,2,2,2,2,3,5,"Scenario B"  
4 294,2,1,2,2,1,4,1,1,2,2,1,3,1,2,"Scenario A"  
5 294,1,1,3,2,2,2,3,2,2,3,3,1,2,4,"Scenario B"  
6 294,2,1,1,1,4,1,2,1,2,3,2,2,5,3,"Scenario A"  
7 294,2,1,1,2,1,4,4,1,2,3,1,3,3,5,"Scenario A"  
8 294,2,2,2,3,3,5,4,1,2,2,3,4,4,1,"Scenario A"  
9 294,1,1,2,1,4,3,5,2,1,1,2,3,5,1,"Scenario A"  
10 294,1,1,3,1,1,1,2,2,2,3,3,2,4,1,"Scenario B"  
11 432,2,1,2,3,1,3,1,1,2,1,1,1,2,2,"Scenario B"  
12 432,1,1,2,1,2,2,3,2,2,3,2,4,1,2,"Scenario B"  
13 432,2,1,3,2,3,5,5,1,2,1,3,4,4,4,"Scenario A"  
14 432,1,2,3,3,1,4,3,2,1,1,1,2,1,4,"Scenario A"  
15 432,1,1,2,1,4,5,5,2,2,1,2,3,4,1,"Scenario B"  
16 432,2,1,2,3,1,1,3,1,2,2,1,2,3,1,"Scenario B"  
17 432,1,2,1,2,1,3,4,2,1,3,3,3,5,1,"Scenario B"  
18 432,2,2,3,2,1,1,5,1,1,2,3,4,2,2,"Scenario A"  
19 432,2,2,3,1,2,4,2,1,1,1,2,2,2,5,"Scenario A"  
20 432,2,2,1,1,3,3,4,1,1,2,3,1,3,5,"Scenario B"  
21 393,1,1,3,3,3,1,2,1,2,2,3,2,2,5,"Scenario B"  
22 393,1,2,3,2,1,1,4,2,1,2,3,4,5,3,"Scenario A"  
23 393,2,2,1,2,3,4,2,1,1,3,1,1,4,5,"Scenario A"  
24 393,1,2,1,1,3,2,1,2,1,1,2,4,3,1,"Scenario B"  
25 393,1,2,2,2,2,3,2,2,2,3,1,4,5,1,"Scenario B"  
26 393,2,1,2,1,2,1,4,1,1,1,3,2,5,2,"Scenario A"  
27 393,2,1,1,3,1,2,1,1,2,3,2,4,3,4,"Scenario A"  
28 393,1,1,3,3,1,5,2,2,2,2,1,3,1,3,"Scenario A"  
29 393,1,1,2,2,3,3,3,2,2,3,1,2,4,5,"Scenario B"  
30 393,1,2,2,3,1,5,4,2,1,3,2,4,2,5,"Scenario A"  
31 500,2,1,2,2,3,2,1,1,2,3,2,1,5,4,"Scenario A"  
32 500,1,2,2,3,2,1,5,2,1,1,1,4,3,3,"Scenario A"  
33 500,2,2,1,1,2,4,5,1,2,2,2,3,1,1,"Scenario B"  
34 500,1,1,3,3,1,4,1,2,2,1,2,4,3,2,"Scenario A"  
35 500,2,1,2,1,4,2,3,1,1,3,3,1,5,3,"Scenario B"  
36 500,2,2,3,1,1,1,1,1,1,1,3,3,3,4,"Scenario A"  
37 500,1,2,1,2,3,2,4,2,1,2,2,2,5,3,"Scenario B"  
38 500,2,2,3,3,4,3,5,2,1,2,1,3,5,2,"Scenario B"  
39 500,1,2,1,1,2,4,5,2,1,3,3,4,2,4,"Scenario A"  
40 500,1,1,2,2,2,1,1,2,2,3,1,1,1,2,"Scenario A"  
41 429,1,2,2,2,4,3,2,1,1,1,3,3,4,3,"Scenario A"  
42 429,2,1,3,1,2,5,4,1,2,1,3,4,2,1,"Scenario A"  
43 429,1,1,1,3,1,4,5,2,2,2,2,2,3,5,"Scenario A"  
44 429,2,1,2,2,1,4,1,1,2,2,1,3,1,2,"Scenario A"  
45 429,1,1,3,2,2,2,3,2,2,3,3,1,2,4,"Scenario B"  
46 429,2,1,1,1,4,1,2,1,2,3,2,2,5,3,"Scenario A"  
47 429,2,1,1,2,1,4,4,1,2,3,1,3,3,5,"Scenario A"  
48 429,2,2,2,3,3,5,4,1,2,2,3,4,4,1,"Scenario A"  
49 429,1,1,2,1,4,3,5,2,1,1,2,3,5,1,"Scenario A"  
50 429,1,1,3,1,1,1,2,2,2,3,3,2,4,1,"Scenario A"  
51 398,2,1,2,3,1,3,1,1,2,1,1,1,2,2,"Scenario B"  
52 398,1,1,2,1,2,2,3,2,2,3,2,4,1,2,"Scenario A"  
53 398,2,1,3,2,3,5,5,1,2,1,3,4,4,4,"Scenario A"  
54 398,1,2,3,3,1,4,3,2,1,1,1,2,1,4,"Scenario A"  
55 398,1,1,2,1,4,5,5,2,2,1,2,3,4,1,"Scenario B"  
56 398,2,1,2,3,1,1,3,1,2,2,1,2,3,1,"Scenario A"  
57 398,1,2,1,2,1,3,4,2,1,3,3,3,5,1,"Scenario A"  
58 398,2,2,3,2,1,1,5,1,1,2,3,4,2,2,"Scenario B"  
59 398,2,2,3,1,2,4,2,1,1,1,2,2,2,5,"Scenario B"  
60

1  
2  
3 398,2,2,1,1,3,3,4,1,1,2,3,1,3,5,"Scenario A"  
4 400,1,1,3,3,3,1,2,1,2,2,3,2,2,5,"Scenario A"  
5 400,1,2,3,2,1,1,4,2,1,2,3,4,5,3,"Scenario A"  
6 400,2,2,1,2,3,4,2,1,1,3,1,1,4,5,"Scenario B"  
7 400,1,2,1,1,3,2,1,2,1,1,2,4,3,1,"Scenario A"  
8 400,1,2,2,2,2,3,2,2,2,3,1,4,5,1,"Scenario A"  
9 400,2,1,2,1,2,1,4,1,1,1,3,2,5,2,"Scenario A"  
10 400,2,1,1,3,1,2,1,1,2,3,2,4,3,4,"Scenario A"  
11 400,1,1,3,3,1,5,2,2,2,2,1,3,1,3,"Scenario A"  
12 400,1,1,2,2,3,3,3,2,2,3,1,2,4,5,"Scenario A"  
13 400,1,2,2,3,1,5,4,2,1,3,2,4,2,5,"Scenario A"  
14 430,2,1,2,2,3,2,1,1,2,3,2,1,5,4,"Scenario A"  
15 430,1,2,2,3,2,1,5,2,1,1,1,4,3,3,"Scenario A"  
16 430,2,2,1,1,2,4,5,1,2,2,2,3,1,1,"Scenario B"  
17 430,1,1,3,3,1,4,1,2,2,1,2,4,3,2,"Scenario A"  
18 430,2,1,2,1,4,2,3,1,1,3,3,1,5,3,"Scenario B"  
19 430,2,2,3,1,1,1,1,1,1,1,3,3,3,4,"Scenario B"  
20 430,1,2,1,2,3,2,4,2,1,2,2,2,5,3,"Scenario A"  
21 430,2,2,3,3,4,3,5,2,1,2,1,3,5,2,"Scenario A"  
22 430,1,2,1,1,2,4,5,2,1,3,3,4,2,4,"Scenario A"  
23 430,1,1,2,2,2,1,1,2,2,3,1,1,1,2,"Scenario B"  
24 499,1,2,2,2,4,3,2,1,1,1,3,3,4,3,"Scenario B"  
25 499,2,1,3,1,2,5,4,1,2,1,3,4,2,1,"Scenario B"  
26 499,1,1,1,3,1,4,5,2,2,2,2,2,3,5,"Scenario A"  
27 499,2,1,2,2,1,4,1,1,2,2,1,3,1,2,"Scenario B"  
28 499,1,1,3,2,2,2,3,2,2,3,3,1,2,4,"Scenario A"  
29 499,2,1,1,1,4,1,2,1,2,3,2,2,5,3,"Scenario B"  
30 499,2,1,1,2,1,4,4,1,2,3,1,3,3,5,"Scenario B"  
31 499,2,2,2,3,3,5,4,1,2,2,3,4,4,1,"Scenario B"  
32 499,1,1,2,1,4,3,5,2,1,1,2,3,5,1,"Scenario A"  
33 499,1,1,3,1,1,1,2,2,2,3,3,2,4,1,"Scenario A"  
34 402,2,1,2,3,1,3,1,1,2,1,1,1,2,2,"Scenario A"  
35 402,1,1,2,1,2,2,3,2,2,3,2,4,1,2,"Scenario B"  
36 402,2,1,3,2,3,5,5,1,2,1,3,4,4,4,"Scenario A"  
37 402,1,2,3,3,1,4,3,2,1,1,1,2,1,4,"Scenario A"  
38 402,1,1,2,1,4,5,5,2,2,1,2,3,4,1,"Scenario B"  
39 402,2,1,2,3,1,1,3,1,2,2,1,2,3,1,"Scenario A"  
40 402,1,2,1,2,1,3,4,2,1,3,3,3,5,1,"Scenario B"  
41 402,2,2,3,2,1,1,5,1,1,2,3,4,2,2,"Scenario B"  
42 402,2,2,3,1,2,4,2,1,1,1,2,2,2,5,"Scenario B"  
43 402,2,2,1,1,3,3,4,1,1,2,3,1,3,5,"Scenario A"  
44 431,1,1,3,3,3,1,2,1,2,2,3,2,2,5,"Scenario B"  
45 431,1,2,3,2,1,1,4,2,1,2,3,4,5,3,"Scenario B"  
46 431,2,2,1,2,3,4,2,1,1,3,1,1,4,5,"Scenario B"  
47 431,1,2,1,1,3,2,1,2,1,1,2,4,3,1,"Scenario B"  
48 431,1,2,2,2,2,3,2,2,2,3,1,4,5,1,"Scenario A"  
49 431,2,1,2,1,2,1,4,1,1,1,3,2,5,2,"Scenario B"  
50 431,2,1,1,3,1,2,1,1,2,3,2,4,3,4,"Scenario B"  
51 431,1,1,3,3,1,5,2,2,2,2,1,3,1,3,"Scenario A"  
52 431,1,1,2,2,3,3,3,2,2,3,1,2,4,5,"Scenario B"  
53 431,1,2,2,3,1,5,4,2,1,3,2,4,2,5,"Scenario B"  
54 399,2,1,2,2,3,2,1,1,2,3,2,1,5,4,"Scenario B"  
55 399,1,2,2,3,2,1,5,2,1,1,1,4,3,3,"Scenario A"  
56 399,2,2,1,1,2,4,5,1,2,2,2,3,1,1,"Scenario B"  
57 399,1,1,3,3,1,4,1,2,2,1,2,4,3,2,"Scenario A"  
58 399,2,1,2,1,4,2,3,1,1,3,3,1,5,3,"Scenario A"  
59 399,2,2,3,1,1,1,1,1,1,1,3,3,3,4,"Scenario B"  
60



1  
2  
3 399,1,2,1,2,3,2,4,2,1,2,2,2,5,3,"Scenario B"  
4 399,2,2,3,3,4,3,5,2,1,2,1,3,5,2,"Scenario A"  
5 399,1,2,1,1,2,4,5,2,1,3,3,4,2,4,"Scenario B"  
6 399,1,1,2,2,2,1,1,2,2,3,1,1,1,2,"Scenario A"  
7 22,1,2,2,2,4,3,2,1,1,1,3,3,4,3,"Scenario A"  
8 22,2,1,3,1,2,5,4,1,2,1,3,4,2,1,"Scenario B"  
9 22,1,1,1,3,1,4,5,2,2,2,2,2,3,5,"Scenario A"  
10 22,2,1,2,2,1,4,1,1,2,2,1,3,1,2,"Scenario A"  
11 22,1,1,3,2,2,2,3,2,2,3,3,1,2,4,"Scenario B"  
12 22,2,1,1,1,4,1,2,1,2,3,2,2,5,3,"Scenario A"  
13 22,2,1,1,2,1,4,4,1,2,3,1,3,3,5,"Scenario A"  
14 22,2,2,2,3,3,5,4,1,2,2,3,4,4,1,"Scenario B"  
15 22,1,1,2,1,4,3,5,2,1,1,2,3,5,1,"Scenario A"  
16 22,1,1,3,1,1,1,2,2,2,3,3,2,4,1,"Scenario B"  
17 25,2,1,2,3,1,3,1,1,2,1,1,1,2,2,"Scenario A"  
18 25,1,1,2,1,2,2,3,2,2,3,2,4,1,2,"Scenario A"  
19 25,2,1,3,2,3,5,5,1,2,1,3,4,4,4,"Scenario A"  
20 25,1,2,3,3,1,4,3,2,1,1,1,2,1,4,"Scenario A"  
21 25,1,1,2,1,4,5,5,2,2,1,2,3,4,1,"Scenario A"  
22 25,2,1,2,3,1,1,3,1,2,2,1,2,3,1,"Scenario A"  
23 25,1,2,1,2,1,3,4,2,1,3,3,3,5,1,"Scenario A"  
24 25,2,2,3,2,1,1,5,1,1,2,3,4,2,2,"Scenario A"  
25 25,2,2,3,1,2,4,2,1,1,1,2,2,2,5,"Scenario A"  
26 25,2,2,1,1,3,3,4,1,1,2,3,1,3,5,"Scenario A"  
27 21,1,1,3,3,3,1,2,1,2,2,3,2,2,5,"Scenario A"  
28 21,1,2,3,2,1,1,4,2,1,2,3,4,5,3,"Scenario A"  
29 21,2,2,1,2,3,4,2,1,1,3,1,1,4,5,"Scenario B"  
30 21,1,2,1,1,3,2,1,2,1,1,2,4,3,1,"Scenario A"  
31 21,1,2,2,2,2,3,2,2,2,3,1,4,5,1,"Scenario B"  
32 21,2,1,2,1,2,1,4,1,1,1,3,2,5,2,"Scenario A"  
33 21,2,1,1,3,1,2,1,1,2,3,2,4,3,4,"Scenario B"  
34 21,1,1,3,3,1,5,2,2,2,2,1,3,1,3,"Scenario A"  
35 21,1,1,2,2,3,3,3,2,2,3,1,2,4,5,"Scenario B"  
36 21,1,2,2,3,1,5,4,2,1,3,2,4,2,5,"Scenario B"  
37 24,2,1,2,2,3,2,1,1,2,3,2,1,5,4,"Scenario A"  
38 24,1,2,2,3,2,1,5,2,1,1,1,4,3,3,"Scenario A"  
39 24,2,2,1,1,2,4,5,1,2,2,2,3,1,1,"Scenario A"  
40 24,1,1,3,3,1,4,1,2,2,1,2,4,3,2,"Scenario B"  
41 24,2,1,2,1,4,2,3,1,1,3,3,1,5,3,"Scenario A"  
42 24,2,2,3,1,1,1,1,1,1,1,3,3,3,4,"Scenario A"  
43 24,1,2,1,2,3,2,4,2,1,2,2,2,5,3,"Scenario B"  
44 24,2,2,3,3,4,3,5,2,1,2,1,3,5,2,"Scenario A"  
45 24,1,2,1,1,2,4,5,2,1,3,3,4,2,4,"Scenario B"  
46 24,1,1,2,2,2,1,1,2,2,3,1,1,1,2,"Scenario A"  
47 23,1,2,2,2,4,3,2,1,1,1,3,3,4,3,"Scenario A"  
48 23,2,1,3,1,2,5,4,1,2,1,3,4,2,1,"Scenario B"  
49 23,1,1,1,3,1,4,5,2,2,2,2,2,3,5,"Scenario A"  
50 23,2,1,2,2,1,4,1,1,2,2,1,3,1,2,"Scenario A"  
51 23,1,1,3,2,2,2,3,2,2,3,3,1,2,4,"Scenario A"  
52 23,2,1,1,1,4,1,2,1,2,3,2,2,5,3,"Scenario A"  
53 23,2,2,2,3,3,5,4,1,2,2,3,4,4,1,"Scenario B"  
54 23,1,1,2,1,4,3,5,2,1,1,2,3,5,1,"Scenario A"  
55 23,1,1,3,1,1,1,2,2,2,3,3,2,4,1,"Scenario A"  
56 116,2,1,2,3,1,3,1,1,2,1,1,1,2,2,"Scenario A"  
57 116,1,1,2,1,2,2,3,2,2,3,2,4,1,2,"Scenario B"  
58 116,2,1,3,2,3,5,5,1,2,1,3,4,4,4,"Scenario B"  
59 116,1,2,3,3,1,4,3,2,1,1,1,2,1,4,"Scenario A"  
60

1  
2  
3 116,1,1,2,1,4,5,5,2,2,1,2,3,4,1,"Scenario A"  
4 116,2,1,2,3,1,1,3,1,2,2,1,2,3,1,"Scenario B"  
5 116,1,2,1,2,1,3,4,2,1,3,3,3,5,1,"Scenario B"  
6 116,2,2,3,2,1,1,5,1,1,2,3,4,2,2,"Scenario B"  
7 116,2,2,3,1,2,4,2,1,1,1,2,2,2,5,"Scenario A"  
8 116,2,2,1,1,3,3,4,1,1,2,3,1,3,5,"Scenario B"  
9 117,1,1,3,3,3,1,2,1,2,2,3,2,2,5,"Scenario B"  
10 117,1,2,3,2,1,1,4,2,1,2,3,4,5,3,"Scenario A"  
11 117,2,2,1,2,3,4,2,1,1,3,1,1,4,5,"Scenario B"  
12 117,1,2,1,1,3,2,1,2,1,1,2,4,3,1,"Scenario A"  
13 117,1,2,2,2,2,3,2,2,2,3,1,4,5,1,"Scenario A"  
14 117,2,1,2,1,2,1,4,1,1,1,1,3,2,5,2,"Scenario A"  
15 117,2,1,1,3,1,2,1,1,2,3,2,4,3,4,"Scenario A"  
16 117,1,1,3,3,1,5,2,2,2,2,1,3,1,3,"Scenario B"  
17 117,1,1,2,2,3,3,3,2,2,3,1,2,4,5,"Scenario B"  
18 117,1,2,2,3,1,5,4,2,1,3,2,4,2,5,"Scenario A"  
19 118,2,1,2,2,3,2,1,1,2,3,2,1,5,4,"Scenario B"  
20 118,1,2,2,3,2,1,5,2,1,1,1,4,3,3,"Scenario B"  
21 118,2,2,1,1,2,4,5,1,2,2,2,3,1,1,"Scenario B"  
22 118,1,1,3,3,1,4,1,2,2,1,2,4,3,2,"Scenario B"  
23 118,2,1,2,1,4,2,3,1,1,3,3,1,5,3,"Scenario B"  
24 118,2,2,3,1,1,1,1,1,1,1,3,3,3,4,"Scenario B"  
25 118,1,2,1,2,3,2,4,2,1,2,2,2,5,3,"Scenario B"  
26 118,2,2,3,3,4,3,5,2,1,2,1,3,5,2,"Scenario B"  
27 118,1,2,1,1,2,4,5,2,1,3,3,4,2,4,"Scenario B"  
28 118,1,1,2,2,2,1,1,2,2,3,1,1,1,2,"Scenario A"  
29 119,1,2,2,2,4,3,2,1,1,1,3,3,4,3,"Scenario A"  
30 119,2,1,3,1,2,5,4,1,2,1,3,4,2,1,"Scenario B"  
31 119,1,1,1,3,1,4,5,2,2,2,2,2,3,5,"Scenario B"  
32 119,2,1,2,2,1,4,1,1,2,2,1,3,1,2,"Scenario A"  
33 119,1,1,3,2,2,2,3,2,2,3,3,1,2,4,"Scenario B"  
34 119,2,1,1,1,4,1,2,1,2,3,2,2,5,3,"Scenario B"  
35 119,2,1,1,2,1,4,4,1,2,3,1,3,3,5,"Scenario B"  
36 119,2,2,2,3,3,5,4,1,2,2,3,4,4,1,"Scenario A"  
37 119,1,1,2,1,4,3,5,2,1,1,2,3,5,1,"Scenario A"  
38 119,1,1,3,1,1,1,2,2,2,3,3,2,4,1,"Scenario B"  
39 120,2,1,2,3,1,3,1,1,2,1,1,1,2,2,"Scenario A"  
40 120,1,1,2,1,2,2,3,2,2,3,2,4,1,2,"Scenario B"  
41 120,2,1,3,2,3,5,5,1,2,1,3,4,4,4,"Scenario B"  
42 120,1,2,3,3,1,4,3,2,1,1,1,2,1,4,"Scenario A"  
43 120,1,1,2,1,4,5,5,2,2,1,2,3,4,1,"Scenario B"  
44 120,2,1,2,3,1,1,3,1,2,2,1,2,3,1,"Scenario B"  
45 120,1,2,1,2,1,3,4,2,1,3,3,3,5,1,"Scenario B"  
46 120,2,2,3,2,1,1,5,1,1,2,3,4,2,2,"Scenario B"  
47 120,2,2,3,1,2,4,2,1,1,1,2,2,2,5,"Scenario A"  
48 120,2,2,1,1,3,3,4,1,1,2,3,1,3,5,"Scenario A"  
49 121,1,1,3,3,3,1,2,1,2,2,3,2,2,5,"Scenario A"  
50 121,1,2,3,2,1,1,4,2,1,2,3,4,5,3,"Scenario B"  
51 121,2,2,1,2,3,4,2,1,1,3,1,1,4,5,"Scenario A"  
52 121,1,2,1,1,3,2,1,2,1,1,2,4,3,1,"Scenario B"  
53 121,1,2,2,2,2,3,2,2,2,3,1,4,5,1,"Scenario B"  
54 121,2,1,2,1,2,1,4,1,1,1,3,2,5,2,"Scenario B"  
55 121,2,1,1,3,1,2,1,1,2,3,2,4,3,4,"Scenario A"  
56 121,1,1,3,3,1,5,2,2,2,2,1,3,1,3,"Scenario A"  
57 121,1,1,2,2,3,3,3,2,2,3,1,2,4,5,"Scenario A"  
58 121,1,2,2,3,1,5,4,2,1,3,2,4,2,5,"Scenario B"  
59 122,2,1,2,2,3,2,1,1,2,3,2,1,5,4,"Scenario B"  
60

1  
2  
3 122,1,2,2,3,2,1,5,2,1,1,1,4,3,3,"Scenario B"  
4 122,2,2,1,1,2,4,5,1,2,2,2,3,1,1,"Scenario A"  
5 122,1,1,3,3,1,4,1,2,2,1,2,4,3,2,"Scenario A"  
6 122,2,1,2,1,4,2,3,1,1,3,3,1,5,3,"Scenario A"  
7 122,2,2,3,1,1,1,1,1,1,1,3,3,3,4,"Scenario A"  
8 122,1,2,1,2,3,2,4,2,1,2,2,2,5,3,"Scenario A"  
9 122,2,2,3,3,4,3,5,2,1,2,1,3,5,2,"Scenario A"  
10 122,1,2,1,1,2,4,5,2,1,3,3,4,2,4,"Scenario B"  
11 122,1,1,2,2,2,1,1,2,2,3,1,1,1,2,"Scenario A"  
12 123,1,2,2,2,4,3,2,1,1,1,3,3,4,3,"Scenario A"  
13 123,2,1,3,1,2,5,4,1,2,1,3,4,2,1,"Scenario B"  
14 123,1,1,1,3,1,4,5,2,2,2,2,2,3,5,"Scenario B"  
15 123,2,1,2,2,1,4,1,1,2,2,1,3,1,2,"Scenario A"  
16 123,1,1,3,2,2,2,3,2,2,3,3,1,2,4,"Scenario A"  
17 123,2,1,1,1,4,1,2,1,2,3,2,2,5,3,"Scenario A"  
18 123,2,1,1,2,1,4,4,1,2,3,1,3,3,5,"Scenario A"  
19 123,2,2,2,3,3,5,4,1,2,2,3,4,4,1,"Scenario B"  
20 123,1,1,2,1,4,3,5,2,1,1,2,3,5,1,"Scenario B"  
21 123,1,1,3,1,1,1,2,2,2,3,3,2,4,1,"Scenario B"  
22 124,2,1,2,3,1,3,1,1,2,1,1,1,2,2,"Scenario A"  
23 124,1,1,2,1,2,2,3,2,2,3,2,4,1,2,"Scenario B"  
24 124,2,1,3,2,3,5,5,1,2,1,3,4,4,4,"Scenario B"  
25 124,1,2,3,3,1,4,3,2,1,1,1,2,1,4,"Scenario A"  
26 124,1,1,2,1,4,5,5,2,2,1,2,3,4,1,"Scenario B"  
27 124,2,1,2,3,1,1,3,1,2,2,1,2,3,1,"Scenario B"  
28 124,1,2,1,2,1,3,4,2,1,3,3,3,5,1,"Scenario B"  
29 124,2,2,3,2,1,1,5,1,1,2,3,4,2,2,"Scenario A"  
30 124,2,2,3,1,2,4,2,1,1,1,2,2,2,5,"Scenario A"  
31 124,2,2,1,1,3,3,4,1,1,2,3,1,3,5,"Scenario A"  
32 125,1,1,3,3,3,1,2,1,2,2,3,2,2,5,"Scenario B"  
33 125,1,2,3,2,1,1,4,2,1,2,3,4,5,3,"Scenario B"  
34 125,2,2,1,2,3,4,2,1,1,3,1,1,4,5,"Scenario B"  
35 125,1,2,1,1,3,2,1,2,1,1,2,4,3,1,"Scenario B"  
36 125,1,2,2,2,2,3,2,2,2,3,1,4,5,1,"Scenario B"  
37 125,2,1,2,1,2,1,4,1,1,1,3,2,5,2,"Scenario B"  
38 125,2,1,1,3,1,2,1,1,2,3,2,4,3,4,"Scenario B"  
39 125,1,1,3,3,1,5,2,2,2,2,1,3,1,3,"Scenario B"  
40 125,1,1,2,2,3,3,3,2,2,3,1,2,4,5,"Scenario B"  
41 125,1,2,2,3,1,5,4,2,1,3,2,4,2,5,"Scenario B"  
42 126,2,1,2,2,3,2,1,1,2,3,2,1,5,4,"Scenario A"  
43 126,1,2,2,3,2,1,5,2,1,1,1,4,3,3,"Scenario A"  
44 126,2,2,1,1,2,4,5,1,2,2,2,3,1,1,"Scenario B"  
45 126,1,1,3,3,1,4,1,2,2,1,2,4,3,2,"Scenario B"  
46 126,2,1,2,1,4,2,3,1,1,3,3,1,5,3,"Scenario A"  
47 126,2,2,3,1,1,1,1,1,1,1,3,3,3,4,"Scenario A"  
48 126,1,2,1,2,3,2,4,2,1,2,2,2,5,3,"Scenario A"  
49 126,2,2,3,3,4,3,5,2,1,2,1,3,5,2,"Scenario A"  
50 126,1,2,1,1,2,4,5,2,1,3,3,4,2,4,"Scenario A"  
51 126,1,1,2,2,2,1,1,2,2,3,1,1,1,2,"Scenario A"  
52 127,1,2,2,2,4,3,2,1,1,1,3,3,4,3,"Scenario A"  
53 127,2,1,3,1,2,5,4,1,2,1,3,4,2,1,"Scenario B"  
54 127,1,1,1,3,1,4,5,2,2,2,2,2,3,5,"Scenario B"  
55 127,2,1,2,2,1,4,1,1,2,2,1,3,1,2,"Scenario B"  
56 127,1,1,3,2,2,2,3,2,2,3,3,1,2,4,"Scenario B"  
57 127,2,1,1,1,4,1,2,1,2,3,2,2,5,3,"Scenario B"  
58 127,2,1,1,2,1,4,4,1,2,3,1,3,3,5,"Scenario B"  
59 127,2,2,2,3,3,5,4,1,2,2,3,4,4,1,"Scenario B"  
60

1  
2  
3 127,1,1,2,1,4,3,5,2,1,1,2,3,5,1,"Scenario A"  
4 127,1,1,3,1,1,1,2,2,2,3,3,2,4,1,"Scenario B"  
5 128,2,1,2,3,1,3,1,1,2,1,1,1,2,2,"Scenario B"  
6 128,1,1,2,1,2,2,3,2,2,3,2,4,1,2,"Scenario B"  
7 128,2,1,3,2,3,5,5,1,2,1,3,4,4,4,"Scenario A"  
8 128,1,2,3,3,1,4,3,2,1,1,1,2,1,4,"Scenario A"  
9 128,1,1,2,1,4,5,5,2,2,1,2,3,4,1,"Scenario A"  
10 128,2,1,2,3,1,1,3,1,2,2,1,2,3,1,"Scenario B"  
11 128,1,2,1,2,1,3,4,2,1,3,3,3,5,1,"Scenario A"  
12 128,2,2,3,2,1,1,5,1,1,2,3,4,2,2,"Scenario A"  
13 128,2,2,3,1,2,4,2,1,1,1,2,2,2,5,"Scenario A"  
14 128,2,2,1,1,3,3,4,1,1,2,3,1,3,5,"Scenario A"  
15 129,1,1,3,3,3,1,2,1,2,2,3,2,2,5,"Scenario A"  
16 129,1,2,3,2,1,1,4,2,1,2,3,4,5,3,"Scenario B"  
17 129,2,2,1,2,3,4,2,1,1,3,1,1,4,5,"Scenario A"  
18 129,1,2,1,1,3,2,1,2,1,1,2,4,3,1,"Scenario A"  
19 129,1,2,2,2,2,3,2,2,2,3,1,4,5,1,"Scenario B"  
20 129,2,1,2,1,2,1,4,1,1,1,3,2,5,2,"Scenario B"  
21 129,2,1,1,3,1,2,1,1,2,3,2,4,3,4,"Scenario A"  
22 129,1,1,3,3,1,5,2,2,2,2,1,3,1,3,"Scenario A"  
23 129,1,1,2,2,3,3,3,2,2,3,1,2,4,5,"Scenario A"  
24 129,1,2,2,3,1,5,4,2,1,3,2,4,2,5,"Scenario A"  
25 130,2,1,2,2,3,2,1,1,2,3,2,1,5,4,"Scenario B"  
26 130,1,2,2,3,2,1,5,2,1,1,1,4,3,3,"Scenario A"  
27 130,2,2,1,1,2,4,5,1,2,2,2,3,1,1,"Scenario A"  
28 130,1,1,3,3,1,4,1,2,2,1,2,4,3,2,"Scenario B"  
29 130,2,1,2,1,4,2,3,1,1,3,3,1,5,3,"Scenario A"  
30 130,2,2,3,1,1,1,1,1,1,1,3,3,3,4,"Scenario A"  
31 130,1,2,1,2,3,2,4,2,1,2,2,2,5,3,"Scenario A"  
32 130,2,2,3,3,4,3,5,2,1,2,1,3,5,2,"Scenario B"  
33 130,1,2,1,1,2,4,5,2,1,3,3,4,2,4,"Scenario A"  
34 130,1,1,2,2,2,1,1,2,2,3,1,1,1,2,"Scenario A"  
35 131,1,2,2,2,4,3,2,1,1,1,3,3,4,3,"Scenario A"  
36 131,2,1,3,1,2,5,4,1,2,1,3,4,2,1,"Scenario B"  
37 131,1,1,1,3,1,4,5,2,2,2,2,2,3,5,"Scenario B"  
38 131,2,1,2,2,1,4,1,1,2,2,1,3,1,2,"Scenario B"  
39 131,1,1,3,2,2,2,3,2,2,3,3,1,2,4,"Scenario B"  
40 131,2,1,1,1,4,1,2,1,2,3,2,2,5,3,"Scenario B"  
41 131,2,1,1,2,1,4,4,1,2,3,1,3,3,5,"Scenario A"  
42 131,2,2,2,3,3,5,4,1,2,2,3,4,4,1,"Scenario A"  
43 131,1,1,2,1,4,3,5,2,1,1,2,3,5,1,"Scenario A"  
44 131,1,1,3,1,1,1,2,2,2,3,3,2,4,1,"Scenario B"  
45 132,2,1,2,3,1,3,1,1,2,1,1,1,2,2,"Scenario A"  
46 132,1,1,2,1,2,2,3,2,2,3,2,4,1,2,"Scenario B"  
47 132,2,1,3,2,3,5,5,1,2,1,3,4,4,4,"Scenario B"  
48 132,1,2,3,3,1,4,3,2,1,1,1,2,1,4,"Scenario A"  
49 132,1,1,2,1,4,5,5,2,2,1,2,3,4,1,"Scenario B"  
50 132,2,1,2,3,1,1,3,1,2,2,1,2,3,1,"Scenario B"  
51 132,1,2,1,2,1,3,4,2,1,3,3,3,5,1,"Scenario B"  
52 132,2,2,3,2,1,1,5,1,1,2,3,4,2,2,"Scenario B"  
53 132,2,2,3,1,2,4,2,1,1,1,2,2,2,5,"Scenario A"  
54 132,2,2,1,1,3,3,4,1,1,2,3,1,3,5,"Scenario A"  
55 133,1,1,3,3,3,1,2,1,2,2,3,2,2,5,"Scenario A"  
56 133,1,2,3,2,1,1,4,2,1,2,3,4,5,3,"Scenario A"  
57 133,2,2,1,2,3,4,2,1,1,3,1,1,4,5,"Scenario B"  
58 133,1,2,1,1,3,2,1,2,1,1,2,4,3,1,"Scenario B"  
59 133,1,2,2,2,2,3,2,2,2,3,1,4,5,1,"Scenario A"  
60

1  
2  
3 133,2,1,2,1,2,1,4,1,1,1,3,2,5,2,"Scenario B"  
4 133,2,1,1,3,1,2,1,1,2,3,2,4,3,4,"Scenario A"  
5 133,1,1,3,3,1,5,2,2,2,2,1,3,1,3,"Scenario A"  
6 133,1,1,2,2,3,3,3,2,2,3,1,2,4,5,"Scenario A"  
7 133,1,2,2,3,1,5,4,2,1,3,2,4,2,5,"Scenario B"  
8 134,2,1,2,2,3,2,1,1,2,3,2,1,5,4,"Scenario A"  
9 134,1,2,2,3,2,1,5,2,1,1,1,4,3,3,"Scenario A"  
10 134,2,2,1,1,2,4,5,1,2,2,2,3,1,1,"Scenario B"  
11 134,1,1,3,3,1,4,1,2,2,1,2,4,3,2,"Scenario A"  
12 134,2,1,2,1,4,2,3,1,1,3,3,1,5,3,"Scenario A"  
13 134,2,2,3,1,1,1,1,1,1,1,3,3,3,4,"Scenario A"  
14 134,1,2,1,2,3,2,4,2,1,2,2,2,5,3,"Scenario B"  
15 134,2,2,3,3,4,3,5,2,1,2,1,3,5,2,"Scenario B"  
16 134,1,2,1,1,2,4,5,2,1,3,3,4,2,4,"Scenario A"  
17 134,1,1,2,2,2,1,1,2,2,3,1,1,1,2,"Scenario A"  
18 135,1,2,2,2,4,3,2,1,1,1,3,3,4,3,"Scenario A"  
19 135,2,1,3,1,2,5,4,1,2,1,3,4,2,1,"Scenario B"  
20 135,1,1,1,3,1,4,5,2,2,2,2,2,3,5,"Scenario B"  
21 135,2,1,2,2,1,4,1,1,2,2,1,3,1,2,"Scenario B"  
22 135,1,1,3,2,2,2,3,2,2,3,3,1,2,4,"Scenario B"  
23 135,2,1,1,1,4,1,2,1,2,3,2,2,5,3,"Scenario A"  
24 135,2,1,1,2,1,4,4,1,2,3,1,3,3,5,"Scenario A"  
25 135,2,2,2,3,3,5,4,1,2,2,3,4,4,1,"Scenario B"  
26 135,1,1,2,1,4,3,5,2,1,1,2,3,5,1,"Scenario B"  
27 135,1,1,3,1,1,1,2,2,2,3,3,2,4,1,"Scenario A"  
28 136,2,1,2,3,1,3,1,1,2,1,1,1,2,2,"Scenario A"  
29 136,1,1,2,1,2,2,3,2,2,3,2,4,1,2,"Scenario B"  
30 136,2,1,3,2,3,5,5,1,2,1,3,4,4,4,"Scenario B"  
31 136,1,2,3,3,1,4,3,2,1,1,1,2,1,4,"Scenario B"  
32 136,1,1,2,1,4,5,5,2,2,1,2,3,4,1,"Scenario B"  
33 136,2,1,2,3,1,1,3,1,2,2,1,2,3,1,"Scenario B"  
34 136,1,2,1,2,1,3,4,2,1,3,3,3,5,1,"Scenario B"  
35 136,2,2,3,2,1,1,5,1,1,2,3,4,2,2,"Scenario B"  
36 136,2,2,3,1,2,4,2,1,1,1,2,2,2,5,"Scenario B"  
37 136,2,2,1,1,3,3,4,1,1,2,3,1,3,5,"Scenario A"  
38 137,1,1,3,3,3,1,2,1,2,2,3,2,2,5,"Scenario B"  
39 137,1,2,3,2,1,1,4,2,1,2,3,4,5,3,"Scenario A"  
40 137,2,2,1,2,3,4,2,1,1,3,1,1,4,5,"Scenario A"  
41 137,1,2,1,1,3,2,1,2,1,1,2,4,3,1,"Scenario A"  
42 137,1,2,2,2,2,3,2,2,2,3,1,4,5,1,"Scenario A"  
43 137,2,1,2,1,2,1,4,1,1,1,3,2,5,2,"Scenario A"  
44 137,2,1,1,3,1,2,1,1,2,3,2,4,3,4,"Scenario A"  
45 137,1,1,3,3,1,5,2,2,2,2,1,3,1,3,"Scenario A"  
46 137,1,1,2,2,3,3,3,2,2,3,1,2,4,5,"Scenario A"  
47 137,1,2,2,3,1,5,4,2,1,3,2,4,2,5,"Scenario A"  
48 138,2,1,2,2,3,2,1,1,2,3,2,1,5,4,"Scenario A"  
49 138,1,2,2,3,2,1,5,2,1,1,1,4,3,3,"Scenario A"  
50 138,2,2,1,1,2,4,5,1,2,2,2,3,1,1,"Scenario A"  
51 138,1,1,3,3,1,4,1,2,2,1,2,4,3,2,"Scenario A"  
52 138,2,1,2,1,4,2,3,1,1,3,3,1,5,3,"Scenario A"  
53 138,2,2,3,1,1,1,1,1,1,1,3,3,3,4,"Scenario A"  
54 138,1,2,1,2,3,2,4,2,1,2,2,2,5,3,"Scenario A"  
55 138,2,2,3,3,4,3,5,2,1,2,1,3,5,2,"Scenario A"  
56 138,1,2,1,1,2,4,5,2,1,3,3,4,2,4,"Scenario A"  
57 138,1,1,2,2,2,1,1,2,2,3,1,1,1,2,"Scenario A"  
58 139,1,2,2,2,4,3,2,1,1,1,3,3,4,3,"Scenario A"  
59 139,2,1,3,1,2,5,4,1,2,1,3,4,2,1,"Scenario B"  
60

1  
2  
3 139,1,1,1,3,1,4,5,2,2,2,2,2,3,5,"Scenario B"  
4 139,2,1,2,2,1,4,1,1,2,2,1,3,1,2,"Scenario A"  
5 139,1,1,3,2,2,2,3,2,2,3,3,1,2,4,"Scenario A"  
6 139,2,1,1,1,4,1,2,1,2,3,2,2,5,3,"Scenario A"  
7 139,2,1,1,2,1,4,4,1,2,3,1,3,3,5,"Scenario A"  
8 139,2,2,2,3,3,5,4,1,2,2,3,4,4,1,"Scenario B"  
9 139,1,1,2,1,4,3,5,2,1,1,2,3,5,1,"Scenario B"  
10 139,1,1,3,1,1,1,2,2,2,3,3,2,4,1,"Scenario B"  
11 140,2,1,2,3,1,3,1,1,2,1,1,1,2,2,"Scenario A"  
12 140,1,1,2,1,2,2,3,2,2,3,2,4,1,2,"Scenario A"  
13 140,2,1,3,2,3,5,5,1,2,1,3,4,4,4,"Scenario A"  
14 140,1,2,3,3,1,4,3,2,1,1,1,2,1,4,"Scenario A"  
15 140,1,1,2,1,4,5,5,2,2,1,2,3,4,1,"Scenario B"  
16 140,2,1,2,3,1,1,3,1,2,2,1,2,3,1,"Scenario A"  
17 140,1,2,1,2,1,3,4,2,1,3,3,3,5,1,"Scenario A"  
18 140,2,2,3,2,1,1,5,1,1,2,3,4,2,2,"Scenario A"  
19 140,2,2,3,1,2,4,2,1,1,1,2,2,2,5,"Scenario A"  
20 140,2,2,1,1,3,3,4,1,1,2,3,1,3,5,"Scenario B"  
21 374,1,1,3,3,3,1,2,1,2,2,3,2,2,5,"Scenario A"  
22 374,1,2,3,2,1,1,4,2,1,2,3,4,5,3,"Scenario A"  
23 374,2,2,1,2,3,4,2,1,1,3,1,1,4,5,"Scenario B"  
24 374,1,2,1,1,3,2,1,2,1,1,2,4,3,1,"Scenario A"  
25 374,1,2,2,2,2,3,2,2,2,3,1,4,5,1,"Scenario A"  
26 374,2,1,2,1,2,1,4,1,1,1,3,2,5,2,"Scenario A"  
27 374,2,1,1,3,1,2,1,1,2,3,2,4,3,4,"Scenario B"  
28 374,1,1,3,3,1,5,2,2,2,2,1,3,1,3,"Scenario B"  
29 374,1,1,2,2,3,3,3,2,2,3,1,2,4,5,"Scenario A"  
30 374,1,2,2,3,1,5,4,2,1,3,2,4,2,5,"Scenario A"  
31 372,2,1,2,2,3,2,1,1,2,3,2,1,5,4,"Scenario A"  
32 372,1,2,2,3,2,1,5,2,1,1,1,4,3,3,"Scenario A"  
33 372,2,2,1,1,2,4,5,1,2,2,2,3,1,1,"Scenario A"  
34 372,1,1,3,3,1,4,1,2,2,1,2,4,3,2,"Scenario A"  
35 372,2,1,2,1,4,2,3,1,1,3,3,1,5,3,"Scenario B"  
36 372,2,2,3,1,1,1,1,1,1,1,3,3,3,4,"Scenario B"  
37 372,1,2,1,2,3,2,4,2,1,2,2,2,5,3,"Scenario A"  
38 372,2,2,3,3,4,3,5,2,1,2,1,3,5,2,"Scenario A"  
39 372,1,2,1,1,2,4,5,2,1,3,3,4,2,4,"Scenario A"  
40 372,1,1,2,2,2,1,1,2,2,3,1,1,1,2,"Scenario A"  
41 342,1,2,2,2,4,3,2,1,1,1,3,3,4,3,"Scenario A"  
42 342,2,1,3,1,2,5,4,1,2,1,3,4,2,1,"Scenario A"  
43 342,1,1,1,3,1,4,5,2,2,2,2,2,3,5,"Scenario A"  
44 342,2,1,2,2,1,4,1,1,2,2,1,3,1,2,"Scenario B"  
45 342,1,1,3,2,2,2,3,2,2,3,3,1,2,4,"Scenario B"  
46 342,2,1,1,1,4,1,2,1,2,3,2,2,5,3,"Scenario B"  
47 342,2,1,1,2,1,4,4,1,2,3,1,3,3,5,"Scenario A"  
48 342,2,2,2,3,3,5,4,1,2,2,3,4,4,1,"Scenario A"  
49 342,1,1,2,1,4,3,5,2,1,1,2,3,5,1,"Scenario B"  
50 342,1,1,3,1,1,1,2,2,2,3,3,2,4,1,"Scenario B"  
51 367,2,1,2,3,1,3,1,1,2,1,1,1,2,2,"Scenario A"  
52 367,1,1,2,1,2,2,3,2,2,3,2,4,1,2,"Scenario A"  
53 367,2,1,3,2,3,5,5,1,2,1,3,4,4,4,"Scenario B"  
54 367,1,2,3,3,1,4,3,2,1,1,1,2,1,4,"Scenario B"  
55 367,1,1,2,1,4,5,5,2,2,1,2,3,4,1,"Scenario B"  
56 367,2,1,2,3,1,1,3,1,2,2,1,2,3,1,"Scenario B"  
57 367,1,2,1,2,1,3,4,2,1,3,3,3,5,1,"Scenario A"  
58 367,2,2,3,2,1,1,5,1,1,2,3,4,2,2,"Scenario A"  
59 367,2,2,3,1,2,4,2,1,1,1,2,2,2,5,"Scenario B"  
60

1  
2  
3 367,2,2,1,1,3,3,4,1,1,2,3,1,3,5,"Scenario A"  
4 339,1,1,3,3,3,1,2,1,2,2,3,2,2,5,"Scenario A"  
5 339,1,2,3,2,1,1,4,2,1,2,3,4,5,3,"Scenario A"  
6 339,2,2,1,2,3,4,2,1,1,3,1,1,4,5,"Scenario A"  
7 339,1,2,1,1,3,2,1,2,1,1,2,4,3,1,"Scenario A"  
8 339,1,2,2,2,2,3,2,2,2,3,1,4,5,1,"Scenario B"  
9 339,2,1,2,1,2,1,4,1,1,1,3,2,5,2,"Scenario A"  
10 339,2,1,1,3,1,2,1,1,2,3,2,4,3,4,"Scenario A"  
11 339,1,1,3,3,1,5,2,2,2,2,1,3,1,3,"Scenario A"  
12 339,1,1,2,2,3,3,3,2,2,3,1,2,4,5,"Scenario B"  
13 339,1,2,2,3,1,5,4,2,1,3,2,4,2,5,"Scenario A"  
14 61,2,1,2,2,3,2,1,1,2,3,2,1,5,4,"Scenario A"  
15 61,1,2,2,3,2,1,5,2,1,1,1,4,3,3,"Scenario B"  
16 61,2,2,1,1,2,4,5,1,2,2,2,3,1,1,"Scenario B"  
17 61,1,1,3,3,1,4,1,2,2,1,2,4,3,2,"Scenario A"  
18 61,2,1,2,1,4,2,3,1,1,3,3,1,5,3,"Scenario A"  
19 61,2,2,3,1,1,1,1,1,1,1,3,3,3,4,"Scenario A"  
20 61,1,2,1,2,3,2,4,2,1,2,2,2,5,3,"Scenario B"  
21 61,2,2,3,3,4,3,5,2,1,2,1,3,5,2,"Scenario B"  
22 61,1,2,1,1,2,4,5,2,1,3,3,4,2,4,"Scenario B"  
23 61,1,1,2,2,2,1,1,2,2,3,1,1,1,2,"Scenario A"  
24 67,1,2,2,2,4,3,2,1,1,1,3,3,4,3,"Scenario A"  
25 67,2,1,3,1,2,5,4,1,2,1,3,4,2,1,"Scenario B"  
26 67,1,1,1,3,1,4,5,2,2,2,2,2,3,5,"Scenario B"  
27 67,2,1,2,2,1,4,1,1,2,2,1,3,1,2,"Scenario B"  
28 67,1,1,3,2,2,2,3,2,2,3,3,1,2,4,"Scenario B"  
29 67,2,1,1,1,4,1,2,1,2,3,2,2,5,3,"Scenario A"  
30 67,2,1,1,2,1,4,4,1,2,3,1,3,3,5,"Scenario B"  
31 67,2,2,2,3,3,5,4,1,2,2,3,4,4,1,"Scenario B"  
32 67,1,1,2,1,4,3,5,2,1,1,2,3,5,1,"Scenario B"  
33 67,1,1,3,1,1,1,2,2,2,3,3,2,4,1,"Scenario B"  
34 64,2,1,2,3,1,3,1,1,2,1,1,1,2,2,"Scenario A"  
35 64,1,1,2,1,2,2,3,2,2,3,2,4,1,2,"Scenario B"  
36 64,2,1,3,2,3,5,5,1,2,1,3,4,4,4,"Scenario A"  
37 64,1,2,3,3,1,4,3,2,1,1,1,2,1,4,"Scenario B"  
38 64,1,1,2,1,4,5,5,2,2,1,2,3,4,1,"Scenario B"  
39 64,2,1,2,3,1,1,3,1,2,2,1,2,3,1,"Scenario B"  
40 64,1,2,1,2,1,3,4,2,1,3,3,3,5,1,"Scenario A"  
41 64,2,2,3,2,1,1,5,1,1,2,3,4,2,2,"Scenario B"  
42 64,2,2,3,1,2,4,2,1,1,1,2,2,2,5,"Scenario B"  
43 64,2,2,1,1,3,3,4,1,1,2,3,1,3,5,"Scenario A"  
44 6,1,1,3,3,3,1,2,1,2,2,3,2,2,5,"Scenario A"  
45 6,1,2,3,2,1,1,4,2,1,2,3,4,5,3,"Scenario B"  
46 6,2,2,1,2,3,4,2,1,1,3,1,1,4,5,"Scenario A"  
47 6,1,2,1,1,3,2,1,2,1,1,2,4,3,1,"Scenario A"  
48 6,1,2,2,2,2,3,2,2,2,3,1,4,5,1,"Scenario B"  
49 6,2,1,2,1,2,1,4,1,1,1,3,2,5,2,"Scenario B"  
50 6,2,1,1,3,1,2,1,1,2,3,2,4,3,4,"Scenario A"  
51 6,1,1,3,3,1,5,2,2,2,2,1,3,1,3,"Scenario A"  
52 6,1,1,2,2,3,3,3,2,2,3,1,2,4,5,"Scenario A"  
53 6,1,2,2,3,1,5,4,2,1,3,2,4,2,5,"Scenario A"  
54 10,2,1,2,2,3,2,1,1,2,3,2,1,5,4,"Scenario B"  
55 10,1,2,2,3,2,1,5,2,1,1,1,4,3,3,"Scenario A"  
56 10,2,2,1,1,2,4,5,1,2,2,2,3,1,1,"Scenario A"  
57 10,1,1,3,3,1,4,1,2,2,1,2,4,3,2,"Scenario A"  
58 10,2,1,2,1,4,2,3,1,1,3,3,1,5,3,"Scenario B"  
59 10,2,2,3,1,1,1,1,1,1,1,3,3,3,4,"Scenario A"  
60

1  
2  
3 10,1,2,1,2,3,2,4,2,1,2,2,2,5,3,"Scenario B"  
4 10,2,2,3,3,4,3,5,2,1,2,1,3,5,2,"Scenario B"  
5 10,1,2,1,1,2,4,5,2,1,3,3,4,2,4,"Scenario A"  
6 10,1,1,2,2,2,1,1,2,2,3,1,1,1,2,"Scenario B"  
7 8,1,2,2,2,4,3,2,1,1,1,3,3,4,3,"Scenario B"  
8 8,2,1,3,1,2,5,4,1,2,1,3,4,2,1,"Scenario A"  
9 8,1,1,1,3,1,4,5,2,2,2,2,2,3,5,"Scenario A"  
10 8,2,1,2,2,1,4,1,1,2,2,1,3,1,2,"Scenario A"  
11 8,1,1,3,2,2,2,3,2,2,3,3,1,2,4,"Scenario B"  
12 8,2,1,1,1,4,1,2,1,2,3,2,2,5,3,"Scenario B"  
13 8,2,1,1,2,1,4,4,1,2,3,1,3,3,5,"Scenario A"  
14 8,2,2,2,3,3,5,4,1,2,2,3,4,4,1,"Scenario A"  
15 8,1,1,2,1,4,3,5,2,1,1,2,3,5,1,"Scenario B"  
16 8,1,1,3,1,1,1,2,2,2,3,3,2,4,1,"Scenario A"  
17 9,2,1,2,3,1,3,1,1,2,1,1,1,2,2,"Scenario A"  
18 9,1,1,2,1,2,2,3,2,2,3,2,4,1,2,"Scenario A"  
19 9,2,1,3,2,3,5,5,1,2,1,3,4,4,4,"Scenario A"  
20 9,1,2,3,3,1,4,3,2,1,1,1,2,1,4,"Scenario A"  
21 9,1,1,2,1,4,5,5,2,2,1,2,3,4,1,"Scenario B"  
22 9,2,1,2,3,1,1,3,1,2,2,1,2,3,1,"Scenario A"  
23 9,1,2,1,2,1,3,4,2,1,3,3,3,5,1,"Scenario A"  
24 9,2,2,3,2,1,1,5,1,1,2,3,4,2,2,"Scenario A"  
25 9,2,2,3,1,2,4,2,1,1,1,2,2,2,5,"Scenario A"  
26 9,2,2,1,1,3,3,4,1,1,2,3,1,3,5,"Scenario B"  
27 5,1,1,3,3,3,1,2,1,2,2,3,2,2,5,"Scenario A"  
28 5,1,2,3,2,1,1,4,2,1,2,3,4,5,3,"Scenario B"  
29 5,2,2,1,2,3,4,2,1,1,3,1,1,4,5,"Scenario A"  
30 5,1,2,1,1,3,2,1,2,1,1,2,4,3,1,"Scenario A"  
31 5,1,2,2,2,2,3,2,2,2,3,1,4,5,1,"Scenario B"  
32 5,2,1,2,1,2,1,4,1,1,1,1,3,2,5,2,"Scenario B"  
33 5,2,1,1,3,1,2,1,1,2,3,2,4,3,4,"Scenario A"  
34 5,1,1,3,3,1,5,2,2,2,2,1,3,1,3,"Scenario A"  
35 5,1,1,2,2,3,3,3,2,2,3,1,2,4,5,"Scenario A"  
36 5,1,2,2,3,1,5,4,2,1,3,2,4,2,5,"Scenario A"  
37 65,2,1,2,2,3,2,1,1,2,3,2,1,5,4,"Scenario A"  
38 65,1,2,2,3,2,1,5,2,1,1,1,4,3,3,"Scenario B"  
39 65,2,2,1,1,2,4,5,1,2,2,2,3,1,1,"Scenario B"  
40 65,1,1,3,3,1,4,1,2,2,1,2,4,3,2,"Scenario A"  
41 65,2,1,2,1,4,2,3,1,1,3,3,1,5,3,"Scenario A"  
42 65,2,2,3,1,1,1,1,1,1,1,3,3,3,4,"Scenario A"  
43 65,1,2,1,2,3,2,4,2,1,2,2,2,5,3,"Scenario B"  
44 65,2,2,3,3,4,3,5,2,1,2,1,3,5,2,"Scenario B"  
45 65,1,2,1,1,2,4,5,2,1,3,3,4,2,4,"Scenario B"  
46 65,1,1,2,2,2,1,1,2,2,3,1,1,1,2,"Scenario A"  
47 66,1,2,2,2,4,3,2,1,1,1,3,3,4,3,"Scenario A"  
48 66,2,1,3,1,2,5,4,1,2,1,3,4,2,1,"Scenario B"  
49 66,1,1,1,3,1,4,5,2,2,2,2,2,3,5,"Scenario B"  
50 66,2,1,2,2,1,4,1,1,2,2,1,3,1,2,"Scenario A"  
51 66,1,1,3,2,2,2,3,2,2,3,3,1,2,4,"Scenario A"  
52 66,2,1,1,1,4,1,2,1,2,3,2,2,5,3,"Scenario A"  
53 66,2,1,1,2,1,4,4,1,2,3,1,3,3,5,"Scenario A"  
54 66,2,2,2,3,3,5,4,1,2,2,3,4,4,1,"Scenario B"  
55 66,1,1,2,1,4,3,5,2,1,1,2,3,5,1,"Scenario B"  
56 66,1,1,3,1,1,1,2,2,2,3,3,2,4,1,"Scenario B"  
57 395,2,1,2,3,1,3,1,1,2,1,1,1,2,2,"Scenario B"  
58 395,1,1,2,1,2,2,3,2,2,3,2,4,1,2,"Scenario B"  
59 395,2,1,3,2,3,5,5,1,2,1,3,4,4,4,"Scenario A"  
60



1  
2  
3 395,1,2,3,3,1,4,3,2,1,1,1,2,1,4,"Scenario A"  
4 395,1,1,2,1,4,5,5,2,2,1,2,3,4,1,"Scenario A"  
5 395,2,1,2,3,1,1,3,1,2,2,1,2,3,1,"Scenario A"  
6 395,1,2,1,2,1,3,4,2,1,3,3,3,5,1,"Scenario B"  
7 395,2,2,3,2,1,1,5,1,1,2,3,4,2,2,"Scenario A"  
8 395,2,2,3,1,2,4,2,1,1,1,2,2,2,5,"Scenario A"  
9 395,2,2,1,1,3,3,4,1,1,2,3,1,3,5,"Scenario B"  
10 181,1,1,3,3,3,1,2,1,2,2,3,2,2,5,"Scenario A"  
11 181,1,2,3,2,1,1,4,2,1,2,3,4,5,3,"Scenario A"  
12 181,2,2,1,2,3,4,2,1,1,3,1,1,4,5,"Scenario A"  
13 181,1,2,1,1,3,2,1,2,1,1,2,4,3,1,"Scenario A"  
14 181,1,2,2,2,2,3,2,2,2,3,1,4,5,1,"Scenario A"  
15 181,2,1,2,1,2,1,4,1,1,1,3,2,5,2,"Scenario B"  
16 181,2,1,1,3,1,2,1,1,2,3,2,4,3,4,"Scenario B"  
17 181,1,1,3,3,1,5,2,2,2,2,1,3,1,3,"Scenario A"  
18 181,1,1,2,2,3,3,3,2,2,3,1,2,4,5,"Scenario B"  
19 181,1,2,2,3,1,5,4,2,1,3,2,4,2,5,"Scenario A"  
20 177,2,1,2,2,3,2,1,1,2,3,2,1,5,4,"Scenario A"  
21 177,1,2,2,3,2,1,5,2,1,1,1,4,3,3,"Scenario B"  
22 177,2,2,1,1,2,4,5,1,2,2,2,3,1,1,"Scenario B"  
23 177,1,1,3,3,1,4,1,2,2,1,2,4,3,2,"Scenario A"  
24 177,2,1,2,1,4,2,3,1,1,3,3,1,5,3,"Scenario B"  
25 177,2,2,3,1,1,1,1,1,1,1,3,3,3,4,"Scenario A"  
26 177,1,2,1,2,3,2,4,2,1,2,2,2,5,3,"Scenario B"  
27 177,2,2,3,3,4,3,5,2,1,2,1,3,5,2,"Scenario B"  
28 177,1,2,1,1,2,4,5,2,1,3,3,4,2,4,"Scenario A"  
29 177,1,1,2,2,2,1,1,2,2,3,1,1,1,2,"Scenario A"  
30 397,1,2,2,2,4,3,2,1,1,1,3,3,4,3,"Scenario A"  
31 397,2,1,3,1,2,5,4,1,2,1,3,4,2,1,"Scenario A"  
32 397,1,1,1,3,1,4,5,2,2,2,2,2,3,5,"Scenario B"  
33 397,2,1,2,2,1,4,1,1,2,2,1,3,1,2,"Scenario A"  
34 397,1,1,3,2,2,2,3,2,2,3,3,1,2,4,"Scenario A"  
35 397,2,1,1,1,4,1,2,1,2,3,2,2,5,3,"Scenario B"  
36 397,2,1,1,2,1,4,4,1,2,3,1,3,3,5,"Scenario A"  
37 397,2,2,2,3,3,5,4,1,2,2,3,4,4,1,"Scenario B"  
38 397,1,1,2,1,4,3,5,2,1,1,2,3,5,1,"Scenario A"  
39 397,1,1,3,1,1,1,2,2,2,3,3,2,4,1,"Scenario A"  
40 179,2,1,2,3,1,3,1,1,2,1,1,1,2,2,"Scenario A"  
41 179,1,1,2,1,2,2,3,2,2,3,2,4,1,2,"Scenario B"  
42 179,2,1,3,2,3,5,5,1,2,1,3,4,4,4,"Scenario B"  
43 179,1,2,3,3,1,4,3,2,1,1,1,2,1,4,"Scenario B"  
44 179,1,1,2,1,4,5,5,2,2,1,2,3,4,1,"Scenario B"  
45 179,2,1,2,3,1,1,3,1,2,2,1,2,3,1,"Scenario A"  
46 179,1,2,1,2,1,3,4,2,1,3,3,3,5,1,"Scenario A"  
47 179,2,2,3,2,1,1,5,1,1,2,3,4,2,2,"Scenario B"  
48 179,2,2,3,1,2,4,2,1,1,1,2,2,2,5,"Scenario B"  
49 179,2,2,1,1,3,3,4,1,1,2,3,1,3,5,"Scenario A"  
50 82,1,1,3,3,3,1,2,1,2,2,3,2,2,5,"Scenario A"  
51 82,1,2,3,2,1,1,4,2,1,2,3,4,5,3,"Scenario B"  
52 82,2,2,1,2,3,4,2,1,1,3,1,1,4,5,"Scenario A"  
53 82,1,2,1,1,3,2,1,2,1,1,2,4,3,1,"Scenario B"  
54 82,1,2,2,2,2,3,2,2,2,3,1,4,5,1,"Scenario B"  
55 82,2,1,2,1,2,1,4,1,1,1,3,2,5,2,"Scenario B"  
56 82,2,1,1,3,1,2,1,1,2,3,2,4,3,4,"Scenario A"  
57 82,1,1,3,3,1,5,2,2,2,2,1,3,1,3,"Scenario A"  
58 82,1,1,2,2,3,3,3,2,2,3,1,2,4,5,"Scenario A"  
59 82,1,2,2,3,1,5,4,2,1,3,2,4,2,5,"Scenario A"  
60

1  
2  
3 239,2,1,2,2,3,2,1,1,2,3,2,1,5,4,"Scenario B"  
4 239,1,2,2,3,2,1,5,2,1,1,1,4,3,3,"Scenario A"  
5 239,2,2,1,1,2,4,5,1,2,2,2,3,1,1,"Scenario A"  
6 239,1,1,3,3,1,4,1,2,2,1,2,4,3,2,"Scenario A"  
7 239,2,1,2,1,4,2,3,1,1,3,3,1,5,3,"Scenario B"  
8 239,2,2,3,1,1,1,1,1,1,1,3,3,3,4,"Scenario A"  
9 239,1,2,1,2,3,2,4,2,1,2,2,2,5,3,"Scenario B"  
10 239,2,2,3,3,4,3,5,2,1,2,1,3,5,2,"Scenario B"  
11 239,1,2,1,1,2,4,5,2,1,3,3,4,2,4,"Scenario A"  
12 239,1,1,2,2,2,1,1,2,2,3,1,1,1,2,"Scenario B"  
13 83,1,2,2,2,4,3,2,1,1,1,3,3,4,3,"Scenario A"  
14 83,2,1,3,1,2,5,4,1,2,1,3,4,2,1,"Scenario A"  
15 83,1,1,1,3,1,4,5,2,2,2,2,2,3,5,"Scenario B"  
16 83,2,1,2,2,1,4,1,1,2,2,1,3,1,2,"Scenario A"  
17 83,1,1,3,2,2,2,3,2,2,3,3,1,2,4,"Scenario A"  
18 83,2,1,1,1,4,1,2,1,2,3,2,2,5,3,"Scenario A"  
19 83,2,1,1,2,1,4,4,1,2,3,1,3,3,5,"Scenario A"  
20 83,2,2,2,3,3,5,4,1,2,2,3,4,4,1,"Scenario B"  
21 83,1,1,2,1,4,3,5,2,1,1,2,3,5,1,"Scenario B"  
22 83,1,1,3,1,1,1,2,2,2,3,3,2,4,1,"Scenario B"  
23 267,2,1,2,3,1,3,1,1,2,1,1,1,2,2,"Scenario A"  
24 267,1,1,2,1,2,2,3,2,2,3,2,4,1,2,"Scenario A"  
25 267,2,1,3,2,3,5,5,1,2,1,3,4,4,4,"Scenario A"  
26 267,1,2,3,3,1,4,3,2,1,1,1,2,1,4,"Scenario A"  
27 267,1,1,2,1,4,5,5,2,2,1,2,3,4,1,"Scenario B"  
28 267,2,1,2,3,1,1,3,1,2,2,1,2,3,1,"Scenario A"  
29 267,1,2,1,2,1,3,4,2,1,3,3,3,5,1,"Scenario A"  
30 267,2,2,3,2,1,1,5,1,1,2,3,4,2,2,"Scenario A"  
31 267,2,2,3,1,2,4,2,1,1,1,2,2,2,5,"Scenario A"  
32 267,2,2,1,1,3,3,4,1,1,2,3,1,3,5,"Scenario B"  
33 240,1,1,3,3,3,1,2,1,2,2,3,2,2,5,"Scenario B"  
34 240,1,2,3,2,1,1,4,2,1,2,3,4,5,3,"Scenario A"  
35 240,2,2,1,2,3,4,2,1,1,3,1,1,4,5,"Scenario B"  
36 240,1,2,1,1,3,2,1,2,1,1,2,4,3,1,"Scenario A"  
37 240,1,2,2,2,2,3,2,2,2,3,1,4,5,1,"Scenario A"  
38 240,2,1,2,1,2,1,4,1,1,1,3,2,5,2,"Scenario A"  
39 240,2,1,1,3,1,2,1,1,2,3,2,4,3,4,"Scenario A"  
40 240,1,1,3,3,1,5,2,2,2,2,1,3,1,3,"Scenario A"  
41 240,1,1,2,2,3,3,3,2,2,3,1,2,4,5,"Scenario B"  
42 240,1,2,2,3,1,5,4,2,1,3,2,4,2,5,"Scenario A"  
43 84,2,1,2,2,3,2,1,1,2,3,2,1,5,4,"Scenario A"  
44 84,1,2,2,3,2,1,5,2,1,1,1,4,3,3,"Scenario B"  
45 84,2,2,1,1,2,4,5,1,2,2,2,3,1,1,"Scenario A"  
46 84,1,1,3,3,1,4,1,2,2,1,2,4,3,2,"Scenario A"  
47 84,2,1,2,1,4,2,3,1,1,3,3,1,5,3,"Scenario B"  
48 84,2,2,3,1,1,1,1,1,1,1,3,3,3,4,"Scenario B"  
49 84,1,2,1,2,3,2,4,2,1,2,2,2,5,3,"Scenario A"  
50 84,2,2,3,3,4,3,5,2,1,2,1,3,5,2,"Scenario A"  
51 84,1,2,1,1,2,4,5,2,1,3,3,4,2,4,"Scenario A"  
52 84,1,1,2,2,2,1,1,2,2,3,1,1,1,2,"Scenario A"  
53 269,1,2,2,2,4,3,2,1,1,1,3,3,4,3,"Scenario A"  
54 269,2,1,3,1,2,5,4,1,2,1,3,4,2,1,"Scenario A"  
55 269,1,1,1,3,1,4,5,2,2,2,2,2,3,5,"Scenario A"  
56 269,2,1,2,2,1,4,1,1,2,2,1,3,1,2,"Scenario A"  
57 269,1,1,3,2,2,2,3,2,2,3,3,1,2,4,"Scenario B"  
58 269,2,1,1,1,4,1,2,1,2,3,2,2,5,3,"Scenario B"  
59 269,2,1,1,2,1,4,4,1,2,3,1,3,3,5,"Scenario B"  
60

1  
2  
3 269,2,2,2,3,3,5,4,1,2,2,3,4,4,1,"Scenario B"  
4 269,1,1,2,1,4,3,5,2,1,1,2,3,5,1,"Scenario B"  
5 269,1,1,3,1,1,1,2,2,2,3,3,2,4,1,"Scenario B"  
6 85,2,1,2,3,1,3,1,1,2,1,1,1,2,2,"Scenario A"  
7 85,1,1,2,1,2,2,3,2,2,3,2,4,1,2,"Scenario B"  
8 85,2,1,3,2,3,5,5,1,2,1,3,4,4,4,"Scenario A"  
9 85,1,2,3,3,1,4,3,2,1,1,1,2,1,4,"Scenario A"  
10 85,1,1,2,1,4,5,5,2,2,1,2,3,4,1,"Scenario B"  
11 85,2,1,2,3,1,1,3,1,2,2,1,2,3,1,"Scenario A"  
12 85,1,2,1,2,1,3,4,2,1,3,3,3,5,1,"Scenario B"  
13 85,2,2,3,2,1,1,5,1,1,2,3,4,2,2,"Scenario A"  
14 85,2,2,3,1,2,4,2,1,1,1,2,2,2,5,"Scenario A"  
15 85,2,2,3,1,2,3,3,4,1,1,2,3,1,3,5,"Scenario B"  
16 86,1,1,3,3,3,1,2,1,2,2,3,2,2,5,"Scenario A"  
17 86,1,2,3,2,1,1,4,2,1,2,3,4,5,3,"Scenario A"  
18 86,2,2,1,2,3,4,2,1,1,3,1,1,4,5,"Scenario A"  
19 86,1,2,1,1,3,2,1,2,1,1,2,4,3,1,"Scenario B"  
20 86,1,2,2,2,2,3,2,2,2,3,1,4,5,1,"Scenario A"  
21 86,2,1,2,1,2,1,4,1,1,1,3,2,5,2,"Scenario A"  
22 86,2,1,1,3,1,2,1,1,2,3,2,4,3,4,"Scenario B"  
23 86,1,1,3,3,1,5,2,2,2,2,1,3,1,3,"Scenario B"  
24 86,1,1,2,2,3,3,3,2,2,3,1,2,4,5,"Scenario B"  
25 86,1,2,2,3,1,5,4,2,1,3,2,4,2,5,"Scenario B"  
26 295,2,1,2,2,3,2,1,1,2,3,2,1,5,4,"Scenario A"  
27 295,1,2,2,3,2,1,5,2,1,1,1,4,3,3,"Scenario A"  
28 295,2,2,1,1,2,4,5,1,2,2,2,3,1,1,"Scenario A"  
29 295,1,1,3,3,1,4,1,2,2,1,2,4,3,2,"Scenario A"  
30 295,2,1,2,1,4,2,3,1,1,3,3,1,5,3,"Scenario B"  
31 295,2,2,3,1,1,1,1,1,1,1,1,3,3,3,4,"Scenario A"  
32 295,1,2,1,2,3,2,4,2,1,2,2,2,5,3,"Scenario A"  
33 295,2,2,3,3,4,3,5,2,1,2,1,3,5,2,"Scenario A"  
34 295,1,2,1,1,2,4,5,2,1,3,3,4,2,4,"Scenario A"  
35 295,1,1,2,2,2,1,1,2,2,3,1,1,1,2,"Scenario B"  
36 87,1,2,2,2,4,3,2,1,1,1,3,3,4,3,"Scenario A"  
37 87,2,1,3,1,2,5,4,1,2,1,3,4,2,1,"Scenario B"  
38 87,1,1,1,3,1,4,5,2,2,2,2,2,3,5,"Scenario B"  
39 87,2,1,2,2,1,4,1,1,2,2,1,3,1,2,"Scenario A"  
40 87,1,1,3,2,2,2,3,2,2,3,3,1,2,4,"Scenario A"  
41 87,2,1,1,1,4,1,2,1,2,3,2,2,5,3,"Scenario B"  
42 87,2,1,1,2,1,4,4,1,2,3,1,3,3,5,"Scenario B"  
43 87,2,2,2,3,3,5,4,1,2,2,3,4,4,1,"Scenario B"  
44 87,1,1,2,1,4,3,5,2,1,1,2,3,5,1,"Scenario B"  
45 87,1,1,3,1,1,1,2,2,2,3,3,2,4,1,"Scenario B"  
46 238,2,1,2,3,1,3,1,1,2,1,1,1,2,2,"Scenario A"  
47 238,1,1,2,1,2,2,3,2,2,3,2,4,1,2,"Scenario B"  
48 238,2,1,3,2,3,5,5,1,2,1,3,4,4,4,"Scenario B"  
49 238,1,2,3,3,1,4,3,2,1,1,1,2,1,4,"Scenario A"  
50 238,1,1,2,1,4,5,5,2,2,1,2,3,4,1,"Scenario A"  
51 238,2,1,2,3,1,1,3,1,2,2,1,2,3,1,"Scenario A"  
52 238,1,2,1,2,1,3,4,2,1,3,3,3,5,1,"Scenario A"  
53 238,2,2,3,2,1,1,5,1,1,2,3,4,2,2,"Scenario A"  
54 238,2,2,3,1,2,4,2,1,1,1,2,2,2,5,"Scenario A"  
55 238,2,2,1,1,3,3,4,1,1,2,3,1,3,5,"Scenario B"  
56 88,1,1,3,3,3,1,2,1,2,2,3,2,2,5,"Scenario A"  
57 88,1,2,3,2,1,1,4,2,1,2,3,4,5,3,"Scenario B"  
58 88,2,2,1,2,3,4,2,1,1,3,1,1,4,5,"Scenario A"  
59 88,1,2,1,1,3,2,1,2,1,1,2,4,3,1,"Scenario B"  
60

1  
2  
3 88,1,2,2,2,2,3,2,2,2,3,1,4,5,1,"Scenario B"  
4 88,2,1,2,1,2,1,4,1,1,1,3,2,5,2,"Scenario A"  
5 88,2,1,1,3,1,2,1,1,2,3,2,4,3,4,"Scenario B"  
6 88,1,1,3,3,1,5,2,2,2,2,1,3,1,3,"Scenario B"  
7 88,1,1,2,2,3,3,3,2,2,3,1,2,4,5,"Scenario B"  
8 88,1,2,2,3,1,5,4,2,1,3,2,4,2,5,"Scenario B"  
9 89,2,1,2,2,3,2,1,1,2,3,2,1,5,4,"Scenario A"  
10 89,1,2,2,3,2,1,5,2,1,1,1,4,3,3,"Scenario B"  
11 89,2,2,1,1,2,4,5,1,2,2,2,3,1,1,"Scenario A"  
12 89,1,1,3,3,1,4,1,2,2,1,2,4,3,2,"Scenario B"  
13 89,2,1,2,1,4,2,3,1,1,3,3,1,5,3,"Scenario A"  
14 89,2,2,3,1,1,1,1,1,1,1,3,3,3,4,"Scenario A"  
15 89,1,2,1,2,3,2,4,2,1,2,2,2,5,3,"Scenario B"  
16 89,2,2,3,3,4,3,5,2,1,2,1,3,5,2,"Scenario A"  
17 89,1,2,1,1,2,4,5,2,1,3,3,4,2,4,"Scenario B"  
18 89,1,1,2,2,2,1,1,2,2,3,1,1,1,2,"Scenario B"  
19 268,1,2,2,2,4,3,2,1,1,1,3,3,4,3,"Scenario A"  
20 268,2,1,3,1,2,5,4,1,2,1,3,4,2,1,"Scenario B"  
21 268,1,1,1,3,1,4,5,2,2,2,2,2,3,5,"Scenario B"  
22 268,2,1,2,2,1,4,1,1,2,2,1,3,1,2,"Scenario B"  
23 268,1,1,3,2,2,2,3,2,2,3,3,1,2,4,"Scenario B"  
24 268,2,1,1,1,4,1,2,1,2,3,2,2,5,3,"Scenario B"  
25 268,2,1,1,2,1,4,4,1,2,3,1,3,3,5,"Scenario B"  
26 268,2,2,2,3,3,5,4,1,2,2,3,4,4,1,"Scenario A"  
27 268,1,1,2,1,4,3,5,2,1,1,2,3,5,1,"Scenario A"  
28 268,1,1,3,1,1,1,2,2,2,3,3,2,4,1,"Scenario A"  
29 106,2,1,2,3,1,3,1,1,2,1,1,1,2,2,"Scenario A"  
30 106,1,1,2,1,2,2,3,2,2,3,2,4,1,2,"Scenario B"  
31 106,2,1,3,2,3,5,5,1,2,1,3,4,4,4,"Scenario B"  
32 106,1,2,3,3,1,4,3,2,1,1,1,2,1,4,"Scenario A"  
33 106,1,1,2,3,1,4,5,5,2,2,1,2,3,4,1,"Scenario B"  
34 106,2,1,2,3,1,1,3,1,2,2,1,2,3,1,"Scenario B"  
35 106,1,2,1,2,1,3,4,2,1,3,3,3,5,1,"Scenario B"  
36 106,2,2,3,2,1,1,5,1,1,2,3,4,2,2,"Scenario B"  
37 106,2,2,3,1,2,4,2,1,1,1,2,2,2,5,"Scenario A"  
38 106,2,2,1,1,3,3,4,1,1,2,3,1,3,5,"Scenario A"  
39 107,1,1,3,3,3,1,2,1,2,2,3,2,2,5,"Scenario A"  
40 107,1,2,3,2,1,1,4,2,1,2,3,4,5,3,"Scenario B"  
41 107,2,2,1,2,3,4,2,1,1,3,1,1,4,5,"Scenario B"  
42 107,1,2,1,1,3,2,1,2,1,1,2,4,3,1,"Scenario A"  
43 107,1,2,2,2,2,3,2,2,2,3,1,4,5,1,"Scenario B"  
44 107,2,1,2,1,2,1,4,1,1,1,3,2,5,2,"Scenario B"  
45 107,2,1,1,3,1,2,1,1,2,3,2,4,3,4,"Scenario B"  
46 107,1,1,3,3,1,5,2,2,2,2,1,3,1,3,"Scenario B"  
47 107,1,1,2,2,3,3,3,2,2,3,1,2,4,5,"Scenario A"  
48 107,1,2,2,3,1,5,4,2,1,3,2,4,2,5,"Scenario A"  
49 108,2,1,2,2,3,2,1,1,2,3,2,1,5,4,"Scenario A"  
50 108,1,2,2,3,2,1,5,2,1,1,1,4,3,3,"Scenario B"  
51 108,2,2,1,1,2,2,4,5,1,2,2,2,3,1,1,"Scenario B"  
52 108,1,1,3,3,1,4,1,2,2,1,2,4,3,2,"Scenario A"  
53 108,2,1,2,1,4,2,3,1,1,3,3,1,5,3,"Scenario B"  
54 108,2,2,3,1,1,1,1,1,1,1,3,3,3,4,"Scenario B"  
55 108,1,2,1,2,3,2,4,2,1,2,2,2,5,3,"Scenario B"  
56 108,2,2,3,3,4,3,5,2,1,2,1,3,5,2,"Scenario B"  
57 108,1,2,1,1,2,4,5,2,1,3,3,4,2,4,"Scenario A"  
58 108,1,1,2,2,2,1,1,2,2,3,1,1,1,2,"Scenario A"  
59 109,1,2,2,2,4,3,2,1,1,1,3,3,4,3,"Scenario B"  
60

1  
2  
3 109,2,1,3,1,2,5,4,1,2,1,3,4,2,1,"Scenario B"  
4 109,1,1,1,3,1,4,5,2,2,2,2,2,3,5,"Scenario A"  
5 109,2,1,2,2,1,4,1,1,2,2,1,3,1,2,"Scenario A"  
6 109,1,1,3,2,2,2,3,2,2,3,3,1,2,4,"Scenario A"  
7 109,2,1,1,1,4,1,2,1,2,3,2,2,5,3,"Scenario B"  
8 109,2,1,1,2,1,4,4,1,2,3,1,3,3,5,"Scenario A"  
9 109,2,2,2,3,3,5,4,1,2,2,3,4,4,1,"Scenario A"  
10 109,1,1,2,1,4,3,5,2,1,1,2,3,5,1,"Scenario B"  
11 109,1,1,3,1,1,1,2,2,2,3,3,2,4,1,"Scenario B"  
12 110,2,1,2,3,1,3,1,1,2,1,1,1,2,2,"Scenario A"  
13 110,1,1,2,1,2,2,3,2,2,3,2,4,1,2,"Scenario B"  
14 110,2,1,3,2,3,5,5,1,2,1,3,4,4,4,"Scenario A"  
15 110,1,2,3,3,1,4,3,2,1,1,1,2,1,4,"Scenario A"  
16 110,1,1,2,1,4,5,5,2,2,1,2,3,4,1,"Scenario B"  
17 110,2,1,2,3,1,1,3,1,2,2,1,2,3,1,"Scenario B"  
18 110,1,2,1,2,1,3,4,2,1,3,3,3,5,1,"Scenario B"  
19 110,2,2,3,2,1,1,5,1,1,2,3,4,2,2,"Scenario B"  
20 110,2,2,3,1,2,4,2,1,1,1,2,2,2,5,"Scenario A"  
21 110,2,2,1,1,3,3,4,1,1,2,3,1,3,5,"Scenario A"  
22 111,1,1,3,3,3,1,2,1,2,2,3,2,2,5,"Scenario A"  
23 111,1,2,3,2,1,1,4,2,1,2,3,4,5,3,"Scenario B"  
24 111,2,2,1,2,3,4,2,1,1,3,1,1,4,5,"Scenario A"  
25 111,1,2,1,1,3,2,1,2,1,1,2,4,3,1,"Scenario A"  
26 111,1,2,2,2,2,3,2,2,2,3,1,4,5,1,"Scenario B"  
27 111,2,1,2,1,2,1,4,1,1,1,3,2,5,2,"Scenario B"  
28 111,2,1,1,3,1,2,1,1,2,3,2,4,3,4,"Scenario A"  
29 111,1,1,3,3,1,5,2,2,2,2,1,3,1,3,"Scenario A"  
30 111,1,1,2,2,3,3,3,2,2,3,1,2,4,5,"Scenario A"  
31 111,1,2,2,3,1,5,4,2,1,3,2,4,2,5,"Scenario A"  
32 112,2,1,2,2,3,2,1,1,2,3,2,1,5,4,"Scenario B"  
33 112,1,2,2,3,2,1,5,2,1,1,1,4,3,3,"Scenario A"  
34 112,2,2,1,1,2,4,5,1,2,2,2,3,1,1,"Scenario A"  
35 112,1,1,3,3,1,4,1,2,2,1,2,4,3,2,"Scenario A"  
36 112,2,1,2,1,4,2,3,1,1,3,3,1,5,3,"Scenario B"  
37 112,2,2,3,1,1,1,1,1,1,1,3,3,3,4,"Scenario A"  
38 112,1,2,1,2,3,2,4,2,1,2,2,2,5,3,"Scenario A"  
39 112,2,2,3,3,4,3,5,2,1,2,1,3,5,2,"Scenario A"  
40 112,1,2,1,1,2,4,5,2,1,3,3,4,2,4,"Scenario A"  
41 112,1,1,2,2,2,1,1,2,2,3,1,1,1,2,"Scenario A"  
42 113,1,2,2,2,4,3,2,1,1,1,3,3,4,3,"Scenario A"  
43 113,2,1,3,1,2,5,4,1,2,1,3,4,2,1,"Scenario A"  
44 113,1,1,1,3,1,4,5,2,2,2,2,2,3,5,"Scenario B"  
45 113,2,1,2,2,1,4,1,1,2,2,1,3,1,2,"Scenario A"  
46 113,1,1,3,2,2,2,3,2,2,3,3,1,2,4,"Scenario B"  
47 113,2,1,1,1,4,1,2,1,2,3,2,2,5,3,"Scenario A"  
48 113,2,1,1,2,1,4,4,1,2,3,1,3,3,5,"Scenario B"  
49 113,2,2,2,3,3,5,4,1,2,2,3,4,4,1,"Scenario B"  
50 113,1,1,2,1,4,3,5,2,1,1,2,3,5,1,"Scenario A"  
51 113,1,1,3,1,1,1,2,2,2,3,3,2,4,1,"Scenario B"  
52 114,2,1,2,3,1,3,1,1,2,1,1,1,2,2,"Scenario A"  
53 114,1,1,2,1,2,2,3,2,2,3,2,4,1,2,"Scenario B"  
54 114,2,1,3,2,3,5,5,1,2,1,3,4,4,4,"Scenario B"  
55 114,1,2,3,3,1,4,3,2,1,1,1,2,1,4,"Scenario A"  
56 114,1,1,2,1,4,5,5,2,2,1,2,3,4,1,"Scenario B"  
57 114,2,1,2,3,1,1,3,1,2,2,1,2,3,1,"Scenario B"  
58 114,1,2,1,2,1,3,4,2,1,3,3,3,5,1,"Scenario B"  
59 114,2,2,3,2,1,1,5,1,1,2,3,4,2,2,"Scenario B"  
60

1  
2  
3 114,2,2,3,1,2,4,2,1,1,1,2,2,2,5,"Scenario A"  
4 114,2,2,1,1,3,3,4,1,1,2,3,1,3,5,"Scenario A"  
5 115,1,1,3,3,3,1,2,1,2,2,3,2,2,5,"Scenario A"  
6 115,1,2,3,2,1,1,4,2,1,2,3,4,5,3,"Scenario B"  
7 115,2,2,1,2,3,4,2,1,1,3,1,1,4,5,"Scenario A"  
8 115,1,2,1,1,3,2,1,2,1,1,2,4,3,1,"Scenario A"  
9 115,1,2,2,2,2,3,2,2,2,3,1,4,5,1,"Scenario A"  
10 115,2,1,2,1,2,1,4,1,1,1,3,2,5,2,"Scenario B"  
11 115,2,1,1,3,1,2,1,1,2,3,2,4,3,4,"Scenario A"  
12 115,1,1,3,3,1,5,2,2,2,2,1,3,1,3,"Scenario A"  
13 115,1,1,2,2,3,3,3,2,2,3,1,2,4,5,"Scenario A"  
14 115,1,2,2,3,1,5,4,2,1,3,2,4,2,5,"Scenario A"  
15 31,2,1,2,2,3,2,1,1,2,3,2,1,5,4,"Scenario B"  
16 31,1,2,2,3,2,1,5,2,1,1,1,4,3,3,"Scenario A"  
17 31,2,2,1,1,2,4,5,1,2,2,2,3,1,1,"Scenario A"  
18 31,1,1,3,3,1,4,1,2,2,1,2,4,3,2,"Scenario A"  
19 31,2,1,2,1,4,2,3,1,1,3,3,1,5,3,"Scenario B"  
20 31,2,2,3,1,1,1,1,1,1,1,3,3,3,4,"Scenario A"  
21 31,1,2,1,2,3,2,4,2,1,2,2,2,5,3,"Scenario B"  
22 31,2,2,3,3,4,3,5,2,1,2,1,3,5,2,"Scenario A"  
23 31,1,2,1,1,2,4,5,2,1,3,3,4,2,4,"Scenario A"  
24 31,1,1,2,2,2,1,1,2,2,3,1,1,1,2,"Scenario B"  
25 30,1,2,2,2,4,3,2,1,1,1,3,3,4,3,"Scenario A"  
26 30,2,1,3,1,2,5,4,1,2,1,3,4,2,1,"Scenario A"  
27 30,1,1,1,3,1,4,5,2,2,2,2,2,3,5,"Scenario B"  
28 30,2,1,2,2,1,4,1,1,2,2,1,3,1,2,"Scenario A"  
29 30,1,1,3,2,2,2,3,2,2,3,3,1,2,4,"Scenario B"  
30 30,2,1,1,1,4,1,2,1,2,3,2,2,5,3,"Scenario B"  
31 30,2,1,1,2,1,4,4,1,2,3,1,3,3,5,"Scenario B"  
32 30,2,2,2,3,3,5,4,1,2,2,3,4,4,1,"Scenario A"  
33 30,1,1,2,1,4,3,5,2,1,1,2,3,5,1,"Scenario B"  
34 30,1,1,3,1,1,1,2,2,2,3,3,2,4,1,"Scenario B"  
35 462,2,1,2,3,1,3,1,1,2,1,1,1,2,2,"Scenario B"  
36 462,1,1,2,1,2,2,3,2,2,3,2,4,1,2,"Scenario A"  
37 462,2,1,3,2,3,5,5,1,2,1,3,4,4,4,"Scenario A"  
38 462,1,2,3,3,1,4,3,2,1,1,1,2,1,4,"Scenario A"  
39 462,1,1,2,1,4,5,5,2,2,1,2,3,4,1,"Scenario B"  
40 462,2,1,2,3,1,1,3,1,2,2,1,2,3,1,"Scenario A"  
41 462,1,2,1,2,1,3,4,2,1,3,3,3,5,1,"Scenario B"  
42 462,2,2,3,2,1,1,5,1,1,2,3,4,2,2,"Scenario B"  
43 462,2,2,3,1,2,4,2,1,1,1,2,2,2,5,"Scenario A"  
44 462,2,2,1,1,3,3,4,1,1,2,3,1,3,5,"Scenario A"  
45 424,1,1,3,3,3,1,2,1,2,2,3,2,2,5,"Scenario B"  
46 424,1,2,3,2,1,1,4,2,1,2,3,4,5,3,"Scenario A"  
47 424,2,2,1,2,3,4,2,1,1,3,1,1,4,5,"Scenario B"  
48 424,1,2,1,1,3,2,1,2,1,1,2,4,3,1,"Scenario B"  
49 424,1,2,2,2,2,3,2,2,2,3,1,4,5,1,"Scenario A"  
50 424,2,1,2,1,2,1,4,1,1,1,1,3,2,5,2,"Scenario A"  
51 424,2,1,1,3,1,2,1,1,2,3,2,4,3,4,"Scenario A"  
52 424,1,1,3,3,1,5,2,2,2,2,1,3,1,3,"Scenario B"  
53 424,1,1,2,2,3,3,3,2,2,3,1,2,4,5,"Scenario A"  
54 424,1,2,2,3,1,5,4,2,1,3,2,4,2,5,"Scenario B"  
55 28,2,1,2,2,3,2,1,1,2,3,2,1,5,4,"Scenario B"  
56 28,1,2,2,3,2,1,5,2,1,1,1,4,3,3,"Scenario A"  
57 28,2,2,1,1,2,4,5,1,2,2,2,3,1,1,"Scenario B"  
58 28,1,1,3,3,1,4,1,2,2,1,2,4,3,2,"Scenario A"  
59 28,2,1,2,1,4,2,3,1,1,3,3,1,5,3,"Scenario B"  
60

1  
2  
3 28,2,2,3,1,1,1,1,1,1,1,3,3,3,4,"Scenario A"  
4 28,1,2,1,2,3,2,4,2,1,2,2,2,5,3,"Scenario B"  
5 28,2,2,3,3,4,3,5,2,1,2,1,3,5,2,"Scenario A"  
6 28,1,2,1,1,2,4,5,2,1,3,3,4,2,4,"Scenario B"  
7 28,1,1,2,2,2,1,1,2,2,3,1,1,1,2,"Scenario B"  
8 401,1,2,2,2,4,3,2,1,1,1,3,3,4,3,"Scenario A"  
9 401,2,1,3,1,2,5,4,1,2,1,3,4,2,1,"Scenario A"  
10 401,1,1,1,3,1,4,5,2,2,2,2,2,3,5,"Scenario A"  
11 401,2,1,2,2,1,4,1,1,2,2,1,3,1,2,"Scenario B"  
12 401,1,1,3,2,2,2,3,2,2,3,3,1,2,4,"Scenario A"  
13 401,2,1,1,1,4,1,2,1,2,3,2,2,5,3,"Scenario B"  
14 401,2,1,1,2,1,4,4,1,2,3,1,3,3,5,"Scenario A"  
15 401,2,2,2,3,3,5,4,1,2,2,3,4,4,1,"Scenario A"  
16 401,1,1,2,1,4,3,5,2,1,1,2,3,5,1,"Scenario A"  
17 401,1,1,3,1,1,1,2,2,2,3,3,2,4,1,"Scenario A"  
18 427,2,1,2,3,1,3,1,1,2,1,1,1,2,2,"Scenario A"  
19 427,1,1,2,1,2,2,3,2,2,3,2,4,1,2,"Scenario B"  
20 427,2,1,3,2,3,5,5,1,2,1,3,4,4,4,"Scenario B"  
21 427,1,2,3,3,1,4,3,2,1,1,1,2,1,4,"Scenario A"  
22 427,1,1,2,1,4,5,5,2,2,1,2,3,4,1,"Scenario A"  
23 427,2,1,2,3,1,1,3,1,2,2,1,2,3,1,"Scenario A"  
24 427,1,2,1,2,1,3,4,2,1,3,3,3,5,1,"Scenario B"  
25 427,2,2,3,2,1,1,5,1,1,2,3,4,2,2,"Scenario B"  
26 427,2,2,3,1,2,4,2,1,1,1,2,2,2,5,"Scenario B"  
27 427,2,2,1,1,3,3,4,1,1,2,3,1,3,5,"Scenario B"  
28 433,1,1,3,3,3,1,2,1,2,2,3,2,2,5,"Scenario A"  
29 433,1,2,3,2,1,1,4,2,1,2,3,4,5,3,"Scenario B"  
30 433,2,2,1,2,3,4,2,1,1,3,1,1,4,5,"Scenario B"  
31 433,1,2,1,1,3,2,1,2,1,1,2,4,3,1,"Scenario A"  
32 433,1,2,2,2,2,3,2,2,2,3,1,4,5,1,"Scenario A"  
33 433,2,1,2,1,2,1,4,1,1,1,3,2,5,2,"Scenario A"  
34 433,2,1,1,3,1,2,1,1,2,3,2,4,3,4,"Scenario B"  
35 433,1,1,3,3,1,5,2,2,2,2,1,3,1,3,"Scenario B"  
36 433,1,1,2,2,3,3,3,2,2,3,1,2,4,5,"Scenario B"  
37 433,1,2,2,3,1,5,4,2,1,3,2,4,2,5,"Scenario A"  
38 428,2,1,2,2,3,2,1,1,2,3,2,1,5,4,"Scenario B"  
39 428,1,2,2,3,2,1,5,2,1,1,1,4,3,3,"Scenario B"  
40 428,2,2,1,1,2,4,5,1,2,2,2,3,1,1,"Scenario A"  
41 428,1,1,3,3,1,4,1,2,2,1,2,4,3,2,"Scenario A"  
42 428,2,1,2,1,4,2,3,1,1,3,3,1,5,3,"Scenario B"  
43 428,2,2,3,1,1,1,1,1,1,1,3,3,3,4,"Scenario A"  
44 428,1,2,1,2,3,2,4,2,1,2,2,2,5,3,"Scenario A"  
45 428,2,2,3,3,4,3,5,2,1,2,1,3,5,2,"Scenario A"  
46 428,1,2,1,1,2,4,5,2,1,3,3,4,2,4,"Scenario A"  
47 428,1,1,2,2,2,1,1,2,2,3,1,1,1,2,"Scenario A"  
48 29,1,2,2,2,4,3,2,1,1,1,3,3,4,3,"Scenario A"  
49 29,2,1,3,1,2,5,4,1,2,1,3,4,2,1,"Scenario A"  
50 29,1,1,1,3,1,4,5,2,2,2,2,2,3,5,"Scenario A"  
51 29,2,1,2,2,1,4,1,1,2,2,1,3,1,2,"Scenario A"  
52 29,1,1,3,2,2,2,3,2,2,3,3,1,2,4,"Scenario B"  
53 29,2,1,1,1,4,1,2,1,2,3,2,2,5,3,"Scenario B"  
54 29,2,1,1,2,1,4,4,1,2,3,1,3,3,5,"Scenario A"  
55 29,2,2,2,3,3,5,4,1,2,2,3,4,4,1,"Scenario A"  
56 29,1,1,2,1,4,3,5,2,1,1,2,3,5,1,"Scenario B"  
57 29,1,1,3,1,1,1,2,2,2,3,3,2,4,1,"Scenario A"  
58 387,2,1,2,3,1,3,1,1,2,1,1,1,2,2,"Scenario A"  
59 387,1,1,2,1,2,2,3,2,2,3,2,4,1,2,"Scenario A"  
60

1  
2  
3 387,2,1,3,2,3,5,5,1,2,1,3,4,4,4,"Scenario B"  
4 387,1,2,3,3,1,4,3,2,1,1,1,2,1,4,"Scenario A"  
5 387,1,1,2,1,4,5,5,2,2,1,2,3,4,1,"Scenario A"  
6 387,2,1,2,3,1,1,3,1,2,2,1,2,3,1,"Scenario B"  
7 387,1,2,1,2,1,3,4,2,1,3,3,3,5,1,"Scenario A"  
8 387,2,2,3,2,1,1,5,1,1,2,3,4,2,2,"Scenario A"  
9 387,2,2,3,1,2,4,2,1,1,1,2,2,2,5,"Scenario A"  
10 387,2,2,1,1,3,3,4,1,1,2,3,1,3,5,"Scenario B"  
11 426,1,1,3,3,3,1,2,1,2,2,3,2,2,5,"Scenario A"  
12 426,1,2,3,2,1,1,4,2,1,2,3,4,5,3,"Scenario A"  
13 426,2,2,1,2,3,4,2,1,1,3,1,1,4,5,"Scenario A"  
14 426,1,2,1,1,3,2,1,2,1,1,2,4,3,1,"Scenario B"  
15 426,1,2,2,2,2,3,2,2,2,2,3,1,4,5,1,"Scenario B"  
16 426,2,1,2,1,2,1,4,1,1,1,3,2,5,2,"Scenario A"  
17 426,2,1,1,3,1,2,1,1,2,3,2,4,3,4,"Scenario A"  
18 426,1,1,3,3,1,5,2,2,2,2,1,3,1,3,"Scenario B"  
19 426,1,1,2,2,3,3,3,2,2,3,1,2,4,5,"Scenario A"  
20 426,1,2,2,3,1,5,4,2,1,3,2,4,2,5,"Scenario A"  
21 434,2,1,2,2,3,2,1,1,2,3,2,1,5,4,"Scenario A"  
22 434,1,2,2,3,2,1,5,2,1,1,1,4,3,3,"Scenario A"  
23 434,2,2,1,1,2,4,5,1,2,2,2,3,1,1,"Scenario A"  
24 434,1,1,3,3,1,4,1,2,2,1,2,4,3,2,"Scenario A"  
25 434,2,1,2,1,4,2,3,1,1,3,3,1,5,3,"Scenario B"  
26 434,2,2,3,1,1,1,1,1,1,1,3,3,3,4,"Scenario A"  
27 434,1,2,1,2,3,2,4,2,1,2,2,2,5,3,"Scenario A"  
28 434,2,2,3,3,4,3,5,2,1,2,1,3,5,2,"Scenario B"  
29 434,1,2,1,1,2,4,5,2,1,3,3,4,2,4,"Scenario A"  
30 434,1,1,2,2,2,1,1,2,2,3,1,1,1,2,"Scenario A"  
31 425,1,2,2,2,4,3,2,1,1,1,3,3,4,3,"Scenario A"  
32 425,2,1,3,1,2,5,4,1,2,1,3,4,2,1,"Scenario A"  
33 425,1,1,1,3,1,4,5,2,2,2,2,2,3,5,"Scenario B"  
34 425,2,1,2,2,1,4,1,1,2,2,1,3,1,2,"Scenario B"  
35 425,1,1,3,2,2,2,3,2,2,3,3,1,2,4,"Scenario A"  
36 425,2,1,1,1,4,1,2,1,2,3,2,2,5,3,"Scenario A"  
37 425,2,1,1,2,1,4,4,1,2,3,1,3,3,5,"Scenario A"  
38 425,2,2,2,3,3,5,4,1,2,2,3,4,4,1,"Scenario B"  
39 425,1,1,2,1,4,3,5,2,1,1,2,3,5,1,"Scenario B"  
40 425,1,1,3,1,1,1,2,2,2,3,3,2,4,1,"Scenario A"  
41 180,2,1,2,3,1,3,1,1,2,1,1,1,2,2,"Scenario A"  
42 180,1,1,2,1,2,2,3,2,2,3,2,4,1,2,"Scenario A"  
43 180,2,1,3,2,3,5,5,1,2,1,3,4,4,4,"Scenario A"  
44 180,1,2,3,3,1,4,3,2,1,1,1,2,1,4,"Scenario A"  
45 180,1,1,2,1,4,5,5,2,2,1,2,3,4,1,"Scenario B"  
46 180,2,1,2,3,1,1,3,1,2,2,1,2,3,1,"Scenario A"  
47 180,1,2,1,2,1,3,4,2,1,3,3,3,5,1,"Scenario A"  
48 180,2,2,3,2,1,1,5,1,1,2,3,4,2,2,"Scenario B"  
49 180,2,2,3,1,2,4,2,1,1,1,2,2,2,5,"Scenario A"  
50 180,2,2,1,1,3,3,4,1,1,2,3,1,3,5,"Scenario A"  
51 90,1,1,3,3,3,1,2,1,2,2,3,2,2,5,"Scenario B"  
52 90,1,2,3,2,1,1,4,2,1,2,3,4,5,3,"Scenario A"  
53 90,2,2,1,2,3,4,2,1,1,3,1,1,4,5,"Scenario B"  
54 90,1,2,1,1,3,2,1,2,1,1,2,4,3,1,"Scenario A"  
55 90,1,2,2,2,2,3,2,2,2,3,1,4,5,1,"Scenario A"  
56 90,2,1,2,1,2,1,4,1,1,1,3,2,5,2,"Scenario A"  
57 90,2,1,1,3,1,2,1,1,2,3,2,4,3,4,"Scenario A"  
58 90,1,1,3,3,1,5,2,2,2,2,1,3,1,3,"Scenario A"  
59 90,1,1,2,2,3,3,3,2,2,3,1,2,4,5,"Scenario B"  
60



1  
2  
3 90,1,2,2,3,1,5,4,2,1,3,2,4,2,5,"Scenario A"  
4 91,2,1,2,2,3,2,1,1,2,3,2,1,5,4,"Scenario A"  
5 91,1,2,2,3,2,1,5,2,1,1,1,4,3,3,"Scenario B"  
6 91,2,2,1,1,2,4,5,1,2,2,2,3,1,1,"Scenario B"  
7 91,1,1,3,3,1,4,1,2,2,1,2,4,3,2,"Scenario B"  
8 91,2,1,2,1,4,2,3,1,1,3,3,1,5,3,"Scenario A"  
9 91,2,2,3,1,1,1,1,1,1,1,3,3,3,4,"Scenario A"  
10 91,1,2,1,2,3,2,4,2,1,2,2,2,5,3,"Scenario B"  
11 91,2,2,3,3,4,3,5,2,1,2,1,3,5,2,"Scenario A"  
12 91,1,2,1,1,2,4,5,2,1,3,3,4,2,4,"Scenario B"  
13 91,1,1,2,2,2,1,1,2,2,3,1,1,1,2,"Scenario B"  
14 92,1,2,2,2,4,3,2,1,1,1,3,3,4,3,"Scenario A"  
15 92,2,1,3,1,2,5,4,1,2,1,3,4,2,1,"Scenario B"  
16 92,1,1,1,3,1,4,5,2,2,2,2,2,3,5,"Scenario B"  
17 92,2,1,2,2,1,4,1,1,2,2,1,3,1,2,"Scenario A"  
18 92,1,1,3,2,2,2,3,2,2,3,3,1,2,4,"Scenario B"  
19 92,2,1,1,1,4,1,2,1,2,3,2,2,5,3,"Scenario A"  
20 92,2,1,1,2,1,4,4,1,2,3,1,3,3,5,"Scenario A"  
21 92,2,2,2,3,3,5,4,1,2,2,3,4,4,1,"Scenario B"  
22 92,1,1,2,1,4,3,5,2,1,1,2,3,5,1,"Scenario B"  
23 92,1,1,3,1,1,1,2,2,2,3,3,2,4,1,"Scenario B"  
24 93,2,1,2,3,1,3,1,1,2,1,1,1,2,2,"Scenario A"  
25 93,1,1,2,1,2,2,3,2,2,3,2,4,1,2,"Scenario B"  
26 93,2,1,3,2,3,5,5,1,2,1,3,4,4,4,"Scenario A"  
27 93,1,2,3,3,1,4,3,2,1,1,1,2,1,4,"Scenario B"  
28 93,1,1,2,1,4,5,5,2,2,1,2,3,4,1,"Scenario B"  
29 93,2,1,2,3,1,1,3,1,2,2,1,2,3,1,"Scenario A"  
30 93,1,2,1,2,1,3,4,2,1,3,3,3,5,1,"Scenario B"  
31 93,2,2,3,2,1,1,5,1,1,2,3,4,2,2,"Scenario A"  
32 93,2,2,3,1,2,4,2,1,1,1,2,2,2,5,"Scenario A"  
33 93,2,2,1,1,3,3,4,1,1,2,3,1,3,5,"Scenario A"  
34 94,1,1,3,3,3,1,2,1,2,2,3,2,2,5,"Scenario B"  
35 94,1,2,3,2,1,1,4,2,1,2,3,4,5,3,"Scenario A"  
36 94,2,2,1,2,3,4,2,1,1,3,1,1,4,5,"Scenario B"  
37 94,1,2,1,1,3,2,1,2,1,1,2,4,3,1,"Scenario A"  
38 94,1,2,2,2,2,3,2,2,2,3,1,4,5,1,"Scenario A"  
39 94,2,1,2,1,2,1,4,1,1,1,3,2,5,2,"Scenario A"  
40 94,2,1,1,3,1,2,1,1,2,3,2,4,3,4,"Scenario A"  
41 94,1,1,3,3,1,5,2,2,2,2,1,3,1,3,"Scenario A"  
42 94,1,1,2,2,3,3,3,2,2,3,1,2,4,5,"Scenario B"  
43 94,1,2,2,3,1,5,4,2,1,3,2,4,2,5,"Scenario A"  
44  
45  
46  
47  
48  
49  
50  
51  
52  
53  
54  
55  
56  
57  
58  
59  
60
