# Supplementary material for: Public preferences for interventions to prevent emerging infectious disease threats: a discrete choice experiment
Source: PubMed Central journal article supplement — BMJ Open. 2018 Feb 16;8(2):e017355. doi: 10.1136/bmjopen-2017-017355 (PMC5857709; doi:10.1136/bmjopen-2017-017355), 2018-02-16
Supplement: bmjopen-2017-017355supp001.pdf [file bmjopen-2017-017355supp001.pdf]

"CaseNo", "Age50", "Gender", "Education", "Race", "Employment", "WithChildren"  
166, FALSE, "Female", "low", "Chinese", "Not in labor force", TRUE  
162, TRUE, "Male", "low", "Chinese", "Not in labor force", FALSE  
163, FALSE, "Female", "low", "Chinese", "Employed", TRUE  
153, FALSE, "Female", "low", "Chinese", "Not in labor force", TRUE  
159, FALSE, "Female", "high", "Chinese", "Employed", FALSE  
184, TRUE, "Male", "low", "Malay", "Employed", TRUE  
185, TRUE, "Female", "low", "Malay", "Not in labor force", TRUE  
156, FALSE, "Male", "low", "Chinese", "Employed", TRUE  
155, FALSE, "Female", "low", "Chinese", "Employed", TRUE  
158, TRUE, "Female", "low", "Chinese", "Not in labor force", FALSE  
161, FALSE, "Female", "low", "Chinese", "Employed", TRUE  
164, TRUE, "Female", "low", "Chinese", "Not in labor force", FALSE  
165, FALSE, "Female", "high", "Chinese", "Employed", FALSE  
157, TRUE, "Male", "high", "Other", "Not in labor force", FALSE  
183, TRUE, "Female", "low", "Chinese", "Employed", TRUE  
198, TRUE, "Female", "low", "Indian", "Not in labor force", FALSE  
196, TRUE, "Female", "low", "Chinese", "Not in labor force", FALSE  
197, TRUE, "Female", "low", "Indian", "Employed", FALSE  
199, FALSE, "Female", "low", "Chinese", "Not in labor force", TRUE  
420, FALSE, "Male", "low", "Chinese", "Employed", TRUE  
194, FALSE, "Male", "high", "Chinese", "Not in labor force", FALSE  
192, TRUE, "Female", "low", "Chinese", "Employed", TRUE  
195, TRUE, "Female", "high", "Chinese", "Employed", FALSE  
200, FALSE, "Male", "low", "Chinese", "Not in labor force", FALSE  
421, TRUE, "Male", "high", "Indian", "Not in labor force", FALSE  
435, FALSE, "Male", "high", "Indian", "Employed", TRUE  
436, TRUE, "Female", "low", "Chinese", "Not in labor force", FALSE  
419, FALSE, "Male", "high", "Chinese", "Employed", FALSE  
463, FALSE, "Male", "high", "Chinese", "Not in labor force", FALSE  
316, FALSE, "Male", "low", "Chinese", "Not in labor force", FALSE  
273, FALSE, "Male", "high", "Chinese", "Employed", FALSE  
207, TRUE, "Female", "low", "Chinese", "Not in labor force", TRUE  
270, FALSE, "Female", "high", "Chinese", "Not in labor force", FALSE  
272, FALSE, "Male", "low", "Chinese", "Employed", TRUE  
289, TRUE, "Female", "low", "Chinese", "Not in labor force", FALSE  
243, TRUE, "Female", "high", "Chinese", "Employed", TRUE  
242, TRUE, "Male", "high", "Chinese", "Not in labor force", FALSE  
363, TRUE, "Female", "low", "Chinese", "Employed", FALSE  
360, TRUE, "Male", "low", "Chinese", "Unemployed", TRUE  
361, TRUE, "Female", "low", "Chinese", "Not in labor force", TRUE  
201, FALSE, "Male", "low", "Malay", "Unemployed", FALSE  
202, TRUE, "Female", "low", "Malay", "Not in labor force", FALSE  
214, FALSE, "Female", "high", "Chinese", "Employed", TRUE  
208, FALSE, "Male", "high", "Indian", "Employed", FALSE  
216, FALSE, "Male", "low", "Chinese", "Employed", TRUE  
205, FALSE, "Male", "low", "Other", "Employed", TRUE  
212, FALSE, "Female", "high", "Indian", "Not in labor force", TRUE  
206, FALSE, "Female", "low", "Chinese", "Employed", TRUE  
215, FALSE, "Male", "high", "Chinese", "Employed", TRUE  
217, FALSE, "Female", "low", "Malay", "Employed", FALSE  
148, TRUE, "Male", "low", "Malay", "Employed", TRUE  
141, FALSE, "Female", "high", "Chinese", "Not in labor force", TRUE  
152, TRUE, "Female", "low", "Other", "Not in labor force", FALSE  
147, FALSE, "Male", "low", "Malay", "Employed", TRUE  
146, FALSE, "Female", "high", "Chinese", "Employed", FALSE  
151, FALSE, "Male", "high", "Chinese", "Employed", FALSE

211,FALSE,"Male","high","Chinese","Employed",TRUE  
362,FALSE,"Female","low","Chinese","Employed",TRUE  
359,TRUE,"Female","low","Chinese","Not in labor force",TRUE  
143,FALSE,"Female","high","Chinese","Employed",FALSE  
144,FALSE,"Female","low","Chinese","Employed",FALSE  
150,FALSE,"Male","low","Malay","Employed",TRUE  
142,TRUE,"Female","low","Chinese","Employed",TRUE  
145,TRUE,"Female","low","Chinese","Not in labor force",FALSE  
149,FALSE,"Female","low","Chinese","Employed",TRUE  
209,TRUE,"Male","low","Chinese","Unemployed",FALSE  
213,TRUE,"Male","high","Chinese","Not in labor force",TRUE  
210,FALSE,"Male","high","Chinese","Employed",TRUE  
204,FALSE,"Male","high","Indian","Employed",TRUE  
203,FALSE,"Male","high","Indian","Employed",TRUE  
20,FALSE,"Male","low","Chinese","Employed",TRUE  
175,FALSE,"Male","high","Other","Employed",TRUE  
17,FALSE,"Female","high","Chinese","Employed",FALSE  
16,FALSE,"Male","high","Chinese","Employed",TRUE  
14,FALSE,"Male","low","Chinese","Not in labor force",FALSE  
18,FALSE,"Female","high","Indian","Employed",TRUE  
15,FALSE,"Male","low","Chinese","Employed",TRUE  
176,TRUE,"Female","low","Malay","Employed",TRUE  
172,TRUE,"Female","low","Malay","Unemployed",TRUE  
173,FALSE,"Male","high","Chinese","Employed",FALSE  
171,FALSE,"Female","high","Chinese","Employed",FALSE  
174,FALSE,"Male","high","Chinese","Employed",TRUE  
19,FALSE,"Female","low","Malay","Unemployed",TRUE  
170,FALSE,"Female","low","Indian","Unemployed",TRUE  
178,FALSE,"Female","high","Chinese","Employed",FALSE  
468,TRUE,"Female","low","Chinese","Not in labor force",FALSE  
251,TRUE,"Male","low","Chinese","Employed",TRUE  
258,FALSE,"Female","high","Other","Employed",TRUE  
246,FALSE,"Female","low","Indian","Employed",TRUE  
475,FALSE,"Female","low","Chinese","Employed",TRUE  
439,FALSE,"Female","low","Indian","Employed",FALSE  
247,FALSE,"Female","low","Malay","Employed",TRUE  
248,TRUE,"Female","low","Malay","Not in labor force",FALSE  
255,FALSE,"Female","high","Chinese","Employed",TRUE  
254,FALSE,"Female","low","Chinese","Not in labor force",TRUE  
465,FALSE,"Female","high","Chinese","Employed",FALSE  
471,FALSE,"Male","high","Chinese","Employed",FALSE  
252,TRUE,"Female","low","Chinese","Employed",FALSE  
470,FALSE,"Male","low","Indian","Employed",TRUE  
474,TRUE,"Female","low","Chinese","Employed",TRUE  
257,TRUE,"Female","low","Chinese","Not in labor force",FALSE  
467,FALSE,"Male","high","Chinese","Unemployed",FALSE  
473,FALSE,"Female","low","Malay","Unemployed",TRUE  
241,TRUE,"Female","low","Chinese","Not in labor force",TRUE  
256,FALSE,"Male","low","Chinese","Employed",TRUE  
250,TRUE,"Female","low","Chinese","Employed",TRUE  
249,FALSE,"Female","low","Chinese","Employed",TRUE  
469,FALSE,"Female","low","Malay","Employed",TRUE  
253,FALSE,"Male","low","Malay","Employed",TRUE  
466,FALSE,"Female","high","Chinese","Employed",TRUE  
224,TRUE,"Female","low","Malay","Employed",TRUE  
219,TRUE,"Female","low","Chinese","Employed",TRUE  
226,TRUE,"Female","low","Malay","Not in labor force",FALSE

222, FALSE, "Male", "high", "Chinese", "Employed", TRUE  
227, TRUE, "Female", "low", "Chinese", "Employed", TRUE  
225, FALSE, "Male", "low", "Malay", "Employed", FALSE  
228, FALSE, "Female", "high", "Malay", "Employed", TRUE  
218, FALSE, "Female", "low", "Indian", "Employed", TRUE  
232, FALSE, "Female", "high", "Chinese", "Employed", TRUE  
229, FALSE, "Male", "high", "Chinese", "Employed", TRUE  
223, TRUE, "Male", "low", "Chinese", "Employed", TRUE  
231, TRUE, "Female", "low", "Chinese", "Employed", TRUE  
220, TRUE, "Male", "low", "Malay", "Employed", TRUE  
230, FALSE, "Male", "high", "Chinese", "Employed", TRUE  
221, TRUE, "Male", "low", "Indian", "Employed", TRUE  
182, TRUE, "Male", "low", "Chinese", "Not in labor force", TRUE  
160, FALSE, "Female", "low", "Chinese", "Employed", TRUE  
186, FALSE, "Male", "high", "Chinese", "Employed", TRUE  
27, FALSE, "Male", "high", "Indian", "Employed", FALSE  
26, TRUE, "Male", "low", "Chinese", "Not in labor force", FALSE  
386, TRUE, "Female", "low", "Chinese", "Not in labor force", FALSE  
169, TRUE, "Male", "low", "Chinese", "Employed", TRUE  
167, TRUE, "Female", "high", "Chinese", "Employed", FALSE  
154, FALSE, "Female", "high", "Chinese", "Employed", TRUE  
168, FALSE, "Female", "high", "Chinese", "Employed", FALSE  
193, FALSE, "Female", "low", "Indian", "Unemployed", FALSE  
187, FALSE, "Male", "high", "Chinese", "Employed", FALSE  
188, FALSE, "Female", "low", "Chinese", "Employed", TRUE  
315, TRUE, "Female", "high", "Chinese", "Not in labor force", TRUE  
314, TRUE, "Female", "low", "Chinese", "Not in labor force", TRUE  
472, FALSE, "Female", "high", "Chinese", "Employed", FALSE  
364, FALSE, "Male", "high", "Chinese", "Not in labor force", FALSE  
340, FALSE, "Male", "high", "Chinese", "Not in labor force", TRUE  
343, FALSE, "Male", "high", "Chinese", "Not in labor force", FALSE  
338, FALSE, "Male", "high", "Chinese", "Not in labor force", FALSE  
371, FALSE, "Male", "high", "Chinese", "Employed", FALSE  
375, FALSE, "Male", "high", "Chinese", "Employed", FALSE  
365, FALSE, "Female", "low", "Chinese", "Not in labor force", FALSE  
373, FALSE, "Male", "high", "Chinese", "Employed", FALSE  
366, FALSE, "Male", "high", "Chinese", "Not in labor force", FALSE  
43, FALSE, "Male", "low", "Chinese", "Employed", FALSE  
50, FALSE, "Female", "high", "Chinese", "Employed", TRUE  
308, FALSE, "Female", "low", "Chinese", "Employed", FALSE  
51, TRUE, "Female", "low", "Chinese", "Employed", TRUE  
48, FALSE, "Female", "high", "Chinese", "Not in labor force", TRUE  
49, TRUE, "Female", "low", "Chinese", "Not in labor force", TRUE  
42, TRUE, "Male", "low", "Malay", "Employed", TRUE  
46, FALSE, "Male", "high", "Chinese", "Employed", FALSE  
47, FALSE, "Male", "low", "Chinese", "Employed", TRUE  
45, FALSE, "Female", "low", "Chinese", "Not in labor force", TRUE  
52, FALSE, "Male", "high", "Chinese", "Employed", TRUE  
40, TRUE, "Male", "low", "Chinese", "Not in labor force", FALSE  
53, FALSE, "Male", "high", "Chinese", "Employed", FALSE  
44, FALSE, "Female", "high", "Chinese", "Employed", TRUE  
41, FALSE, "Female", "low", "Chinese", "Employed", TRUE  
58, FALSE, "Male", "high", "Other", "Employed", TRUE  
12, TRUE, "Male", "low", "Indian", "Employed", TRUE  
54, FALSE, "Female", "low", "Chinese", "Employed", FALSE  
56, FALSE, "Female", "high", "Chinese", "Employed", TRUE  
11, FALSE, "Female", "high", "Chinese", "Employed", TRUE

483, FALSE, "Female", "high", "Other", "Employed", FALSE  
482, TRUE, "Female", "high", "Chinese", "Not in labor force", FALSE  
485, FALSE, "Male", "high", "Chinese", "Employed", TRUE  
480, FALSE, "Male", "high", "Chinese", "Employed", TRUE  
479, TRUE, "Male", "high", "Chinese", "Employed", TRUE  
69, FALSE, "Male", "low", "Chinese", "Not in labor force", FALSE  
57, FALSE, "Female", "low", "Chinese", "Not in labor force", TRUE  
55, FALSE, "Male", "high", "Indian", "Employed", FALSE  
13, FALSE, "Male", "high", "Chinese", "Employed", FALSE  
59, FALSE, "Female", "high", "Chinese", "Employed", FALSE  
70, FALSE, "Male", "low", "Chinese", "Employed", FALSE  
71, TRUE, "Male", "low", "Chinese", "Employed", FALSE  
73, FALSE, "Female", "low", "Indian", "Employed", TRUE  
74, FALSE, "Female", "high", "Chinese", "Unemployed", FALSE  
190, FALSE, "Male", "high", "Chinese", "Employed", FALSE  
75, FALSE, "Female", "high", "Chinese", "Employed", FALSE  
76, FALSE, "Female", "high", "Chinese", "Employed", TRUE  
77, TRUE, "Male", "low", "Chinese", "Employed", TRUE  
78, FALSE, "Male", "high", "Other", "Employed", FALSE  
189, FALSE, "Female", "low", "Malay", "Employed", FALSE  
72, FALSE, "Female", "low", "Chinese", "Employed", TRUE  
95, FALSE, "Female", "low", "Chinese", "Employed", FALSE  
191, FALSE, "Female", "low", "Chinese", "Employed", TRUE  
79, FALSE, "Male", "low", "Chinese", "Not in labor force", FALSE  
80, FALSE, "Male", "high", "Chinese", "Not in labor force", FALSE  
417, FALSE, "Male", "high", "Chinese", "Employed", FALSE  
416, FALSE, "Male", "high", "Indian", "Employed", TRUE  
381, TRUE, "Female", "low", "Chinese", "Not in labor force", TRUE  
390, FALSE, "Male", "high", "Chinese", "Not in labor force", FALSE  
391, FALSE, "Male", "low", "Malay", "Employed", FALSE  
389, FALSE, "Female", "low", "Malay", "Not in labor force", TRUE  
380, TRUE, "Female", "low", "Chinese", "Not in labor force", TRUE  
382, FALSE, "Female", "low", "Chinese", "Not in labor force", TRUE  
383, FALSE, "Female", "low", "Malay", "Employed", TRUE  
384, TRUE, "Female", "low", "Chinese", "Not in labor force", TRUE  
385, TRUE, "Female", "low", "Chinese", "Not in labor force", FALSE  
388, TRUE, "Male", "low", "Chinese", "Not in labor force", FALSE  
378, TRUE, "Female", "low", "Chinese", "Not in labor force", TRUE  
379, FALSE, "Male", "low", "Malay", "Employed", FALSE  
392, FALSE, "Male", "low", "Malay", "Employed", TRUE  
412, TRUE, "Female", "low", "Chinese", "Not in labor force", TRUE  
413, TRUE, "Female", "low", "Chinese", "Not in labor force", TRUE  
415, FALSE, "Female", "high", "Chinese", "Employed", FALSE  
414, FALSE, "Male", "high", "Chinese", "Employed", FALSE  
411, FALSE, "Female", "low", "Chinese", "Not in labor force", TRUE  
297, TRUE, "Female", "low", "Indian", "Not in labor force", TRUE  
300, FALSE, "Male", "high", "Chinese", "Not in labor force", FALSE  
299, FALSE, "Male", "low", "Malay", "Employed", TRUE  
298, FALSE, "Female", "low", "Malay", "Unemployed", TRUE  
303, FALSE, "Male", "high", "Other", "Employed", TRUE  
292, TRUE, "Female", "low", "Chinese", "Employed", TRUE  
301, TRUE, "Female", "low", "Indian", "Not in labor force", TRUE  
290, FALSE, "Male", "low", "Chinese", "Not in labor force", FALSE  
484, TRUE, "Male", "low", "Chinese", "Employed", TRUE  
291, TRUE, "Male", "low", "Malay", "Not in labor force", FALSE  
476, FALSE, "Male", "high", "Chinese", "Employed", TRUE  
244, FALSE, "Female", "high", "Chinese", "Employed", TRUE

477,TRUE,"Female","low","Chinese","Not in labor force",FALSE  
245,FALSE,"Female","high","Chinese","Employed",TRUE  
481,FALSE,"Female","high","Chinese","Employed",TRUE  
407,FALSE,"Female","low","Chinese","Not in labor force",FALSE  
486,TRUE,"Female","low","Malay","Employed",FALSE  
312,TRUE,"Male","low","Chinese","Not in labor force",FALSE  
310,FALSE,"Female","high","Chinese","Employed",FALSE  
487,TRUE,"Male","high","Chinese","Employed",TRUE  
304,FALSE,"Male","low","Malay","Employed",FALSE  
406,FALSE,"Female","high","Indian","Not in labor force",TRUE  
377,TRUE,"Female","low","Chinese","Employed",TRUE  
311,FALSE,"Female","high","Chinese","Employed",TRUE  
309,FALSE,"Female","high","Chinese","Employed",FALSE  
488,FALSE,"Male","high","Chinese","Not in labor force",FALSE  
489,TRUE,"Female","low","Chinese","Not in labor force",TRUE  
490,FALSE,"Male","low","Indian","Employed",FALSE  
493,FALSE,"Female","high","Indian","Not in labor force",TRUE  
494,TRUE,"Female","low","Chinese","Not in labor force",TRUE  
235,FALSE,"Male","low","Malay","Employed",TRUE  
345,FALSE,"Female","high","Indian","Employed",TRUE  
234,FALSE,"Female","high","Chinese","Employed",TRUE  
236,TRUE,"Male","high","Chinese","Employed",TRUE  
237,FALSE,"Male","high","Chinese","Employed",TRUE  
349,FALSE,"Female","low","Chinese","Employed",TRUE  
344,FALSE,"Male","high","Chinese","Employed",TRUE  
352,FALSE,"Male","low","Chinese","Employed",TRUE  
346,FALSE,"Female","high","Malay","Not in labor force",FALSE  
350,TRUE,"Male","low","Chinese","Not in labor force",FALSE  
353,FALSE,"Female","low","Chinese","Employed",FALSE  
440,FALSE,"Female","low","Malay","Employed",TRUE  
351,FALSE,"Male","high","Malay","Employed",FALSE  
348,FALSE,"Female","low","Chinese","Employed",TRUE  
347,FALSE,"Female","high","Chinese","Employed",TRUE  
34,TRUE,"Male","low","Chinese","Not in labor force",TRUE  
32,TRUE,"Female","low","Indian","Not in labor force",TRUE  
37,TRUE,"Female","low","Chinese","Not in labor force",FALSE  
38,FALSE,"Male","high","Chinese","Employed",TRUE  
33,FALSE,"Female","high","Chinese","Unemployed",FALSE  
454,FALSE,"Male","high","Indian","Employed",TRUE  
458,FALSE,"Male","low","Indian","Employed",TRUE  
39,TRUE,"Female","low","Chinese","Employed",TRUE  
35,FALSE,"Male","low","Chinese","Employed",FALSE  
36,FALSE,"Male","high","Chinese","Employed",FALSE  
327,FALSE,"Female","high","Indian","Employed",TRUE  
328,FALSE,"Male","high","Other","Employed",TRUE  
370,FALSE,"Female","high","Indian","Employed",TRUE  
368,TRUE,"Female","low","Chinese","Employed",FALSE  
456,FALSE,"Male","high","Chinese","Not in labor force",FALSE  
438,TRUE,"Male","low","Chinese","Not in labor force",TRUE  
408,TRUE,"Male","low","Chinese","Not in labor force",FALSE  
357,TRUE,"Female","high","Chinese","Employed",FALSE  
356,TRUE,"Male","high","Chinese","Not in labor force",FALSE  
441,TRUE,"Female","low","Chinese","Not in labor force",FALSE  
358,FALSE,"Female","high","Chinese","Employed",FALSE  
341,FALSE,"Female","high","Indian","Employed",TRUE  
355,TRUE,"Male","low","Chinese","Not in labor force",FALSE  
233,TRUE,"Female","high","Chinese","Not in labor force",TRUE

354,FALSE,"Female","low","Chinese","Employed",FALSE  
457,FALSE,"Male","high","Chinese","Employed",FALSE  
404,TRUE,"Male","high","Chinese","Employed",TRUE  
403,TRUE,"Female","high","Chinese","Employed",TRUE  
369,FALSE,"Male","high","Chinese","Employed",FALSE  
455,FALSE,"Female","low","Chinese","Not in labor force",TRUE  
60,FALSE,"Female","high","Chinese","Not in labor force",FALSE  
7,FALSE,"Male","high","Chinese","Employed",TRUE  
62,FALSE,"Male","low","Chinese","Employed",TRUE  
4,TRUE,"Male","low","Chinese","Not in labor force",FALSE  
63,FALSE,"Female","low","Indian","Employed",TRUE  
422,TRUE,"Female","high","Chinese","Employed",TRUE  
68,TRUE,"Female","low","Chinese","Not in labor force",FALSE  
423,TRUE,"Male","low","Chinese","Employed",TRUE  
306,TRUE,"Female","low","Other","Not in labor force",FALSE  
376,TRUE,"Female","high","Chinese","Employed",FALSE  
305,TRUE,"Male","low","Chinese","Not in labor force",FALSE  
409,TRUE,"Male","low","Chinese","Not in labor force",TRUE  
410,FALSE,"Female","low","Chinese","Employed",TRUE  
461,TRUE,"Male","low","Chinese","Employed",FALSE  
437,FALSE,"Male","high","Chinese","Not in labor force",FALSE  
451,FALSE,"Female","low","Malay","Not in labor force",FALSE  
446,FALSE,"Female","low","Chinese","Not in labor force",TRUE  
320,FALSE,"Male","low","Malay","Employed",FALSE  
449,FALSE,"Female","high","Chinese","Employed",FALSE  
450,FALSE,"Male","high","Chinese","Employed",FALSE  
448,FALSE,"Female","low","Chinese","Not in labor force",TRUE  
447,FALSE,"Female","low","Chinese","Employed",TRUE  
405,FALSE,"Male","high","Chinese","Employed",TRUE  
453,FALSE,"Male","high","Chinese","Employed",FALSE  
443,TRUE,"Female","high","Chinese","Employed",TRUE  
3,FALSE,"Female","high","Chinese","Employed",TRUE  
81,TRUE,"Male","high","Malay","Employed",FALSE  
317,FALSE,"Male","high","Malay","Employed",TRUE  
322,FALSE,"Female","low","Chinese","Employed",TRUE  
321,TRUE,"Male","low","Malay","Not in labor force",TRUE  
1,FALSE,"Female","low","Other","Not in labor force",TRUE  
324,FALSE,"Male","low","Chinese","Employed",TRUE  
323,FALSE,"Male","low","Chinese","Employed",TRUE  
325,FALSE,"Male","high","Chinese","Not in labor force",FALSE  
2,TRUE,"Male","high","Chinese","Employed",TRUE  
313,TRUE,"Female","high","Malay","Employed",TRUE  
318,TRUE,"Male","low","Chinese","Employed",TRUE  
319,TRUE,"Male","low","Chinese","Employed",TRUE  
326,FALSE,"Male","high","Chinese","Unemployed",FALSE  
307,TRUE,"Male","high","Chinese","Employed",TRUE  
278,TRUE,"Female","high","Chinese","Employed",TRUE  
283,FALSE,"Male","high","Chinese","Employed",TRUE  
279,TRUE,"Female","high","Chinese","Employed",TRUE  
329,FALSE,"Female","low","Malay","Not in labor force",TRUE  
332,FALSE,"Male","high","Other","Employed",TRUE  
337,FALSE,"Male","high","Chinese","Not in labor force",TRUE  
336,FALSE,"Male","high","Chinese","Employed",TRUE  
335,FALSE,"Female","low","Malay","Employed",TRUE  
333,FALSE,"Female","low","Malay","Employed",TRUE  
334,FALSE,"Male","high","Other","Not in labor force",FALSE  
282,FALSE,"Male","low","Chinese","Employed",TRUE

276,TRUE,"Male","low","Chinese","Not in labor force",FALSE  
284,FALSE,"Female","high","Other","Employed",FALSE  
275,FALSE,"Female","low","Chinese","Employed",FALSE  
274,TRUE,"Female","low","Chinese","Not in labor force",FALSE  
331,FALSE,"Female","high","Chinese","Employed",TRUE  
330,FALSE,"Female","high","Indian","Employed",TRUE  
281,FALSE,"Female","high","Chinese","Employed",TRUE  
280,FALSE,"Female","high","Chinese","Not in labor force",FALSE  
277,FALSE,"Female","high","Chinese","Employed",FALSE  
496,FALSE,"Male","high","Chinese","Employed",FALSE  
492,FALSE,"Male","low","Chinese","Not in labor force",FALSE  
497,TRUE,"Female","low","Chinese","Not in labor force",TRUE  
491,FALSE,"Male","high","Chinese","Employed",TRUE  
495,FALSE,"Male","high","Chinese","Employed",FALSE  
96,FALSE,"Male","low","Other","Employed",FALSE  
97,TRUE,"Female","low","Chinese","Not in labor force",TRUE  
98,FALSE,"Female","low","Chinese","Not in labor force",TRUE  
99,FALSE,"Male","high","Chinese","Not in labor force",FALSE  
100,FALSE,"Female","low","Chinese","Employed",FALSE  
101,FALSE,"Female","low","Chinese","Employed",FALSE  
102,TRUE,"Female","low","Malay","Employed",FALSE  
103,TRUE,"Female","high","Chinese","Employed",TRUE  
104,FALSE,"Female","high","Chinese","Employed",FALSE  
105,TRUE,"Male","low","Chinese","Employed",TRUE  
445,FALSE,"Male","high","Chinese","Employed",FALSE  
478,TRUE,"Female","low","Chinese","Not in labor force",TRUE  
444,TRUE,"Female","high","Chinese","Employed",TRUE  
442,TRUE,"Male","low","Chinese","Employed",TRUE  
452,FALSE,"Female","low","Chinese","Employed",TRUE  
262,FALSE,"Female","low","Other","Employed",FALSE  
464,TRUE,"Female","high","Chinese","Employed",TRUE  
271,FALSE,"Female","high","Chinese","Employed",FALSE  
259,FALSE,"Male","high","Chinese","Employed",TRUE  
265,FALSE,"Female","high","Chinese","Not in labor force",TRUE  
287,FALSE,"Female","high","Chinese","Employed",FALSE  
459,FALSE,"Female","high","Chinese","Employed",FALSE  
288,TRUE,"Female","low","Chinese","Not in labor force",TRUE  
266,FALSE,"Male","high","Malay","Employed",TRUE  
260,FALSE,"Female","high","Indian","Employed",TRUE  
418,FALSE,"Female","high","Malay","Employed",TRUE  
460,FALSE,"Male","low","Chinese","Employed",FALSE  
263,TRUE,"Female","low","Chinese","Not in labor force",TRUE  
302,TRUE,"Male","low","Chinese","Employed",FALSE  
264,TRUE,"Female","low","Indian","Not in labor force",TRUE  
261,TRUE,"Female","low","Chinese","Not in labor force",TRUE  
285,FALSE,"Male","low","Chinese","Employed",TRUE  
296,FALSE,"Male","low","Chinese","Employed",TRUE  
293,TRUE,"Male","high","Chinese","Employed",TRUE  
286,FALSE,"Female","low","Chinese","Employed",FALSE  
394,TRUE,"Male","low","Chinese","Not in labor force",FALSE  
396,TRUE,"Female","low","Chinese","Not in labor force",FALSE  
498,TRUE,"Male","low","Chinese","Not in labor force",TRUE  
294,FALSE,"Male","high","Chinese","Employed",TRUE  
432,TRUE,"Female","low","Chinese","Not in labor force",TRUE  
393,TRUE,"Female","high","Chinese","Employed",TRUE  
500,FALSE,"Female","low","Chinese","Not in labor force",TRUE  
429,TRUE,"Male","low","Malay","Employed",TRUE

398,TRUE,"Male","high","Chinese","Not in labor force",TRUE  
400,TRUE,"Female","high","Chinese","Employed",FALSE  
430,FALSE,"Male","low","Chinese","Unemployed",FALSE  
499,TRUE,"Male","low","Chinese","Not in labor force",FALSE  
402,FALSE,"Male","high","Chinese","Employed",FALSE  
431,FALSE,"Male","high","Indian","Employed",TRUE  
399,TRUE,"Male","high","Chinese","Not in labor force",FALSE  
22,FALSE,"Female","low","Chinese","Not in labor force",FALSE  
25,TRUE,"Female","low","Chinese","Not in labor force",TRUE  
21,FALSE,"Female","high","Chinese","Employed",FALSE  
24,FALSE,"Female","high","Other","Employed",TRUE  
23,TRUE,"Male","low","Chinese","Employed",TRUE  
116,FALSE,"Male","high","Other","Employed",TRUE  
117,FALSE,"Female","low","Chinese","Employed",FALSE  
118,TRUE,"Male","low","Chinese","Not in labor force",FALSE  
119,FALSE,"Female","low","Malay","Employed",TRUE  
120,TRUE,"Female","low","Other","Not in labor force",TRUE  
121,FALSE,"Female","high","Chinese","Employed",FALSE  
122,FALSE,"Male","high","Other","Employed",TRUE  
123,FALSE,"Male","high","Chinese","Employed",FALSE  
124,FALSE,"Male","low","Other","Unemployed",TRUE  
125,FALSE,"Female","high","Chinese","Employed",FALSE  
126,FALSE,"Male","high","Chinese","Employed",TRUE  
127,TRUE,"Female","high","Chinese","Employed",TRUE  
128,TRUE,"Female","low","Malay","Employed",TRUE  
129,FALSE,"Female","high","Indian","Not in labor force",TRUE  
130,FALSE,"Male","low","Chinese","Employed",FALSE  
131,FALSE,"Male","high","Chinese","Employed",TRUE  
132,FALSE,"Male","low","Chinese","Employed",TRUE  
133,FALSE,"Male","low","Malay","Employed",FALSE  
134,FALSE,"Male","low","Chinese","Employed",FALSE  
135,FALSE,"Male","low","Chinese","Employed",FALSE  
136,FALSE,"Female","high","Indian","Employed",TRUE  
137,FALSE,"Female","high","Chinese","Employed",TRUE  
138,FALSE,"Male","high","Malay","Employed",FALSE  
139,FALSE,"Male","high","Malay","Employed",FALSE  
140,TRUE,"Male","low","Malay","Employed",TRUE  
374,FALSE,"Female","high","Chinese","Not in labor force",FALSE  
372,TRUE,"Female","high","Chinese","Not in labor force",TRUE  
342,FALSE,"Female","high","Chinese","Not in labor force",FALSE  
367,FALSE,"Female","low","Chinese","Not in labor force",TRUE  
339,FALSE,"Female","high","Chinese","Employed",FALSE  
61,FALSE,"Male","high","Chinese","Not in labor force",FALSE  
67,FALSE,"Male","high","Chinese","Employed",TRUE  
64,TRUE,"Female","low","Chinese","Not in labor force",TRUE  
6,TRUE,"Male","high","Chinese","Employed",TRUE  
10,TRUE,"Female","low","Chinese","Not in labor force",TRUE  
8,TRUE,"Male","low","Malay","Employed",TRUE  
9,TRUE,"Female","low","Malay","Employed",TRUE  
5,FALSE,"Female","low","Malay","Employed",FALSE  
65,FALSE,"Male","high","Chinese","Not in labor force",FALSE  
66,FALSE,"Male","high","Chinese","Employed",FALSE  
395,TRUE,"Male","low","Chinese","Employed",FALSE  
181,FALSE,"Male","high","Indian","Employed",FALSE  
177,TRUE,"Male","low","Chinese","Not in labor force",TRUE  
397,TRUE,"Female","low","Chinese","Employed",TRUE  
179,FALSE,"Female","high","Chinese","Employed",TRUE



82,FALSE,"Female","high","Chinese","Employed",TRUE  
239,FALSE,"Male","low","Malay","Employed",TRUE  
83,FALSE,"Male","high","Chinese","Employed",TRUE  
267,FALSE,"Female","low","Chinese","Not in labor force",TRUE  
240,FALSE,"Female","low","Indian","Not in labor force",FALSE  
84,FALSE,"Female","high","Indian","Employed",FALSE  
269,TRUE,"Male","low","Chinese","Not in labor force",TRUE  
85,TRUE,"Female","low","Chinese","Not in labor force",TRUE  
86,FALSE,"Male","low","Chinese","Employed",FALSE  
295,TRUE,"Male","high","Chinese","Employed",TRUE  
87,FALSE,"Female","high","Chinese","Employed",TRUE  
238,TRUE,"Female","low","Chinese","Employed",TRUE  
88,FALSE,"Female","high","Indian","Employed",FALSE  
89,TRUE,"Female","low","Chinese","Not in labor force",TRUE  
268,FALSE,"Male","high","Other","Employed",TRUE  
106,FALSE,"Female","high","Chinese","Not in labor force",TRUE  
107,FALSE,"Male","high","Chinese","Employed",FALSE  
108,FALSE,"Male","high","Chinese","Employed",TRUE  
109,FALSE,"Female","high","Indian","Employed",TRUE  
110,FALSE,"Male","low","Malay","Employed",TRUE  
111,FALSE,"Female","low","Chinese","Employed",TRUE  
112,FALSE,"Male","low","Indian","Employed",FALSE  
113,FALSE,"Female","high","Chinese","Employed",FALSE  
114,FALSE,"Male","high","Chinese","Employed",FALSE  
115,TRUE,"Female","low","Chinese","Employed",TRUE  
31,TRUE,"Male","low","Chinese","Employed",FALSE  
30,TRUE,"Male","low","Chinese","Employed",FALSE  
462,TRUE,"Female","low","Indian","Not in labor force",FALSE  
424,FALSE,"Male","high","Chinese","Employed",TRUE  
28,FALSE,"Female","high","Malay","Employed",FALSE  
401,TRUE,"Female","low","Malay","Employed",TRUE  
427,FALSE,"Male","low","Malay","Employed",TRUE  
433,FALSE,"Female","high","Indian","Employed",TRUE  
428,FALSE,"Female","low","Chinese","Not in labor force",FALSE  
29,FALSE,"Female","low","Chinese","Employed",FALSE  
387,TRUE,"Female","low","Chinese","Employed",TRUE  
426,TRUE,"Male","low","Malay","Not in labor force",FALSE  
434,TRUE,"Male","low","Chinese","Unemployed",FALSE  
425,TRUE,"Female","low","Chinese","Not in labor force",TRUE  
180,FALSE,"Female","low","Chinese","Employed",TRUE  
90,FALSE,"Male","low","Chinese","Employed",FALSE  
91,TRUE,"Female","low","Chinese","Not in labor force",TRUE  
92,TRUE,"Female","low","Chinese","Not in labor force",TRUE  
93,FALSE,"Male","high","Chinese","Not in labor force",FALSE  
94,TRUE,"Female","low","Chinese","Not in labor force",TRUE
