# Supplementary material for: Public preferences for interventions to prevent emerging infectious disease threats: a discrete choice experiment
Source: PubMed Central journal article supplement — BMJ Open. 2018 Feb 16;8(2):e017355. doi: 10.1136/bmjopen-2017-017355 (PMC5857709; doi:10.1136/bmjopen-2017-017355), 2018-02-16
Supplement: bmjopen-2017-017355supp002.pdf [file bmjopen-2017-017355supp002.pdf]

"CaseNo", "Quarantine.A", "Isolation.A", "NoMassGatherings.A", "TempScreening.A",  
"Tax.A", "Infections.A", "Deaths.A", "Quarantine.B", "Isolation.B", "NoMassGatheri  
ngs.B", "TempScreening.B", "Tax.B", "Infections.B", "Deaths.B", "Choice"  
166,2,1,2,2,3,2,1,1,2,3,2,1,5,4, "Scenario A"  
166,1,2,2,3,2,1,5,2,1,1,1,4,3,3, "Scenario A"  
166,2,2,1,1,2,4,5,1,2,2,2,3,1,1, "Scenario B"  
166,1,1,3,3,1,4,1,2,2,1,2,4,3,2, "Scenario A"  
166,2,1,2,1,4,2,3,1,1,3,3,1,5,3, "Scenario B"  
166,2,2,3,1,1,1,1,1,1,1,3,3,3,4, "Scenario A"  
166,1,2,1,2,3,2,4,2,1,2,2,2,5,3, "Scenario B"  
166,2,2,3,3,4,3,5,2,1,2,1,3,5,2, "Scenario A"  
166,1,2,1,1,2,4,5,2,1,3,3,4,2,4, "Scenario B"  
166,1,1,2,2,2,1,1,2,2,3,1,1,1,2, "Scenario B"  
162,1,2,2,2,4,3,2,1,1,1,3,3,4,3, "Scenario A"  
162,2,1,3,1,2,5,4,1,2,1,3,4,2,1, "Scenario A"  
162,1,1,1,3,1,4,5,2,2,2,2,2,3,5, "Scenario A"  
162,2,1,2,2,1,4,1,1,2,2,1,3,1,2, "Scenario A"  
162,1,1,3,2,2,2,3,2,2,3,3,1,2,4, "Scenario A"  
162,2,1,1,1,4,1,2,1,2,3,2,2,5,3, "Scenario A"  
162,2,1,1,2,1,4,4,1,2,3,1,3,3,5, "Scenario A"  
162,2,2,2,3,3,5,4,1,2,2,3,4,4,1, "Scenario B"  
162,1,1,2,1,4,3,5,2,1,1,2,3,5,1, "Scenario A"  
162,1,1,3,1,1,1,2,2,2,3,3,2,4,1, "Scenario B"  
163,2,1,2,3,1,3,1,1,2,1,1,1,2,2, "Scenario A"  
163,1,1,2,1,2,2,3,2,2,3,2,4,1,2, "Scenario A"  
163,2,1,3,2,3,5,5,1,2,1,3,4,4,4, "Scenario B"  
163,1,2,3,3,1,4,3,2,1,1,1,2,1,4, "Scenario A"  
163,1,1,2,1,4,5,5,2,2,1,2,3,4,1, "Scenario A"  
163,2,1,2,3,1,1,3,1,2,2,1,2,3,1, "Scenario B"  
163,1,2,1,2,1,3,4,2,1,3,3,3,5,1, "Scenario A"  
163,2,2,3,2,1,1,5,1,1,2,3,4,2,2, "Scenario B"  
163,2,2,3,1,2,4,2,1,1,1,2,2,2,5, "Scenario B"  
163,2,2,1,1,3,3,4,1,1,2,3,1,3,5, "Scenario B"  
153,1,1,3,3,3,1,2,1,2,2,3,2,2,5, "Scenario B"  
153,1,2,3,2,1,1,4,2,1,2,3,4,5,3, "Scenario B"  
153,2,2,1,2,3,4,2,1,1,3,1,1,4,5, "Scenario A"  
153,1,2,1,1,3,2,1,2,1,1,2,4,3,1, "Scenario A"  
153,1,2,2,2,2,3,2,2,2,3,1,4,5,1, "Scenario A"  
153,2,1,2,1,2,1,4,1,1,1,3,2,5,2, "Scenario A"  
153,2,1,1,3,1,2,1,1,2,3,2,4,3,4, "Scenario A"  
153,1,1,3,3,1,5,2,2,2,2,1,3,1,3, "Scenario B"  
153,1,1,2,2,3,3,3,2,2,3,1,2,4,5, "Scenario B"  
153,1,2,2,3,1,5,4,2,1,3,2,4,2,5, "Scenario A"  
159,2,1,2,2,3,2,1,1,2,3,2,1,5,4, "Scenario A"  
159,1,2,2,3,2,1,5,2,1,1,1,4,3,3, "Scenario B"  
159,2,2,1,1,2,4,5,1,2,2,2,3,1,1, "Scenario A"  
159,1,1,3,3,1,4,1,2,2,1,2,4,3,2, "Scenario B"  
159,2,1,2,1,4,2,3,1,1,3,3,1,5,3, "Scenario A"  
159,2,2,3,1,1,1,1,1,1,1,3,3,3,4, "Scenario A"  
159,1,2,1,2,3,2,4,2,1,2,2,2,5,3, "Scenario B"  
159,2,2,3,3,4,3,5,2,1,2,1,3,5,2, "Scenario B"  
159,1,2,1,1,2,4,5,2,1,3,3,4,2,4, "Scenario A"  
159,1,1,2,2,2,1,1,2,2,3,1,1,1,2, "Scenario A"  
184,1,2,2,2,4,3,2,1,1,1,3,3,4,3, "Scenario A"  
184,2,1,3,1,2,5,4,1,2,1,3,4,2,1, "Scenario A"  
184,1,1,1,3,1,4,5,2,2,2,2,2,3,5, "Scenario A"  
184,2,1,2,2,1,4,1,1,2,2,1,3,1,2, "Scenario A"

184,1,1,3,2,2,2,3,2,2,3,3,1,2,4,"Scenario A"  
184,2,1,1,1,4,1,2,1,2,3,2,2,5,3,"Scenario A"  
184,2,1,1,2,1,4,4,1,2,3,1,3,3,5,"Scenario A"  
184,2,2,2,3,3,5,4,1,2,2,3,4,4,1,"Scenario A"  
184,1,1,2,1,4,3,5,2,1,1,2,3,5,1,"Scenario A"  
184,1,1,3,1,1,1,2,2,2,3,3,2,4,1,"Scenario A"  
185,2,1,2,3,1,3,1,1,2,1,1,1,2,2,"Scenario A"  
185,1,1,2,1,2,2,3,2,2,3,2,4,1,2,"Scenario A"  
185,2,1,3,2,3,5,5,1,2,1,3,4,4,4,"Scenario B"  
185,1,2,3,3,1,4,3,2,1,1,1,2,1,4,"Scenario A"  
185,1,1,2,1,4,5,5,2,2,1,2,3,4,1,"Scenario A"  
185,2,1,2,3,1,1,3,1,2,2,1,2,3,1,"Scenario A"  
185,1,2,1,2,1,3,4,2,1,3,3,3,5,1,"Scenario B"  
185,2,2,3,2,1,1,5,1,1,2,3,4,2,2,"Scenario A"  
185,2,2,3,1,2,4,2,1,1,1,2,2,2,5,"Scenario B"  
185,2,2,1,1,3,3,4,1,1,2,3,1,3,5,"Scenario A"  
156,1,1,3,3,3,1,2,1,2,2,3,2,2,5,"Scenario A"  
156,1,2,3,2,1,1,4,2,1,2,3,4,5,3,"Scenario B"  
156,2,2,1,2,3,4,2,1,1,3,1,1,4,5,"Scenario A"  
156,1,2,1,1,3,2,1,2,1,1,2,4,3,1,"Scenario A"  
156,1,2,2,2,2,3,2,2,2,3,1,4,5,1,"Scenario B"  
156,2,1,2,1,2,1,4,1,1,1,3,2,5,2,"Scenario B"  
156,2,1,1,3,1,2,1,1,2,3,2,4,3,4,"Scenario A"  
156,1,1,3,3,1,5,2,2,2,2,1,3,1,3,"Scenario A"  
156,1,1,2,2,3,3,3,2,2,3,1,2,4,5,"Scenario A"  
156,1,2,2,3,1,5,4,2,1,3,2,4,2,5,"Scenario A"  
155,2,1,2,2,3,2,1,1,2,3,2,1,5,4,"Scenario B"  
155,1,2,2,3,2,1,5,2,1,1,1,4,3,3,"Scenario A"  
155,2,2,1,1,2,4,5,1,2,2,2,3,1,1,"Scenario A"  
155,1,1,3,3,1,4,1,2,2,1,2,4,3,2,"Scenario A"  
155,2,1,2,1,4,2,3,1,1,3,3,1,5,3,"Scenario B"  
155,2,2,3,1,1,1,1,1,1,1,3,3,3,4,"Scenario A"  
155,1,2,1,2,3,2,4,2,1,2,2,2,5,3,"Scenario B"  
155,2,2,3,3,4,3,5,2,1,2,1,3,5,2,"Scenario B"  
155,1,2,1,1,2,4,5,2,1,3,3,4,2,4,"Scenario A"  
155,1,1,2,2,2,1,1,2,2,3,1,1,1,2,"Scenario A"  
158,1,2,2,2,4,3,2,1,1,1,3,3,4,3,"Scenario A"  
158,2,1,3,1,2,5,4,1,2,1,3,4,2,1,"Scenario A"  
158,1,1,1,3,1,4,5,2,2,2,2,2,3,5,"Scenario A"  
158,2,1,2,2,1,4,1,1,2,2,1,3,1,2,"Scenario B"  
158,1,1,3,2,2,2,3,2,2,3,3,1,2,4,"Scenario A"  
158,2,1,1,1,4,1,2,1,2,3,2,2,5,3,"Scenario A"  
158,2,1,1,2,1,4,4,1,2,3,1,3,3,5,"Scenario B"  
158,2,2,2,3,3,5,4,1,2,2,3,4,4,1,"Scenario A"  
158,1,1,2,1,4,3,5,2,1,1,2,3,5,1,"Scenario B"  
158,1,1,3,1,1,1,2,2,2,3,3,2,4,1,"Scenario A"  
161,2,1,2,3,1,3,1,1,2,1,1,1,2,2,"Scenario B"  
161,1,1,2,1,2,1,2,2,3,2,2,3,2,4,1,2,"Scenario A"  
161,2,1,3,2,3,5,5,1,2,1,3,4,4,4,"Scenario B"  
161,1,2,3,3,1,4,3,2,1,1,1,2,1,4,"Scenario B"  
161,1,1,2,1,4,5,5,2,2,1,2,3,4,1,"Scenario A"  
161,2,1,2,3,1,1,3,1,2,2,1,2,3,1,"Scenario A"  
161,1,2,1,2,1,3,4,2,1,3,3,3,5,1,"Scenario A"  
161,2,2,3,2,1,1,5,1,1,2,3,4,2,2,"Scenario B"  
161,2,2,3,1,2,4,2,1,1,1,2,2,2,5,"Scenario B"  
161,2,2,1,1,3,3,4,1,1,2,3,1,3,5,"Scenario B"  
164,1,1,3,3,3,1,2,1,2,2,3,2,2,5,"Scenario B"

164,1,2,3,2,1,1,4,2,1,2,3,4,5,3,"Scenario B"  
164,2,2,1,2,3,4,2,1,1,3,1,1,4,5,"Scenario B"  
164,1,2,1,1,3,2,1,2,1,1,2,4,3,1,"Scenario B"  
164,1,2,2,2,2,3,2,2,2,3,1,4,5,1,"Scenario A"  
164,2,1,2,1,2,1,4,1,1,1,3,2,5,2,"Scenario B"  
164,2,1,1,3,1,2,1,1,2,3,2,4,3,4,"Scenario A"  
164,1,1,3,3,1,5,2,2,2,2,1,3,1,3,"Scenario B"  
164,1,1,2,2,3,3,3,2,2,3,1,2,4,5,"Scenario B"  
164,1,2,2,3,1,5,4,2,1,3,2,4,2,5,"Scenario A"  
165,2,1,2,2,3,2,1,1,2,3,2,1,5,4,"Scenario A"  
165,1,2,2,3,2,1,5,2,1,1,1,4,3,3,"Scenario A"  
165,2,2,1,1,2,4,5,1,2,2,2,3,1,1,"Scenario B"  
165,1,1,3,3,1,4,1,2,2,1,2,4,3,2,"Scenario A"  
165,2,1,2,1,4,2,3,1,1,3,3,1,5,3,"Scenario A"  
165,2,2,3,1,1,1,1,1,1,1,3,3,3,4,"Scenario A"  
165,1,2,1,2,3,2,4,2,1,2,2,2,5,3,"Scenario B"  
165,2,2,3,3,4,3,5,2,1,2,1,3,5,2,"Scenario B"  
165,1,2,1,1,2,4,5,2,1,3,3,4,2,4,"Scenario B"  
165,1,1,2,2,2,1,1,2,2,3,1,1,1,2,"Scenario A"  
157,1,2,2,2,4,3,2,1,1,1,3,3,4,3,"Scenario A"  
157,2,1,3,1,2,5,4,1,2,1,3,4,2,1,"Scenario A"  
157,1,1,1,3,1,4,5,2,2,2,2,2,3,5,"Scenario B"  
157,2,1,2,2,1,4,1,1,2,2,1,3,1,2,"Scenario B"  
157,1,1,3,2,2,2,3,2,2,3,3,1,2,4,"Scenario B"  
157,2,1,1,1,4,1,2,1,2,3,2,2,5,3,"Scenario B"  
157,2,1,1,2,1,4,4,1,2,3,1,3,3,5,"Scenario A"  
157,2,2,2,3,3,5,4,1,2,2,3,4,4,1,"Scenario A"  
157,1,1,2,1,4,3,5,2,1,1,2,3,5,1,"Scenario B"  
157,1,1,3,1,1,1,2,2,2,3,3,2,4,1,"Scenario A"  
183,2,1,2,3,1,2,3,1,1,2,1,1,1,2,2,"Scenario B"  
183,1,1,2,1,2,1,2,2,3,2,2,3,2,4,1,2,"Scenario B"  
183,2,1,3,2,3,5,5,1,2,1,3,4,4,4,"Scenario A"  
183,1,2,3,3,1,4,3,2,1,1,1,2,1,4,"Scenario A"  
183,1,1,2,1,4,5,5,2,2,1,2,3,4,1,"Scenario A"  
183,2,1,2,3,1,1,3,1,2,2,1,2,3,1,"Scenario B"  
183,1,2,1,2,1,3,4,2,1,3,3,3,5,1,"Scenario A"  
183,2,2,3,2,1,1,5,1,1,2,3,4,2,2,"Scenario B"  
183,2,2,3,1,2,4,2,1,1,1,2,2,2,5,"Scenario A"  
183,2,2,1,1,3,3,4,1,1,2,3,1,3,5,"Scenario B"  
198,1,1,3,3,3,1,2,1,2,2,3,2,2,5,"Scenario A"  
198,1,2,3,2,1,1,4,2,1,2,3,4,5,3,"Scenario A"  
198,2,2,1,2,3,4,2,1,1,3,1,1,4,5,"Scenario A"  
198,1,2,1,1,3,2,1,2,1,1,2,4,3,1,"Scenario A"  
198,1,2,2,2,2,3,2,2,2,3,1,4,5,1,"Scenario A"  
198,2,1,2,1,2,1,4,1,1,1,3,2,5,2,"Scenario B"  
198,2,1,1,3,1,2,1,1,2,3,2,4,3,4,"Scenario B"  
198,1,1,3,3,1,5,2,2,2,2,1,3,1,3,"Scenario A"  
198,1,1,2,2,3,3,3,2,2,3,1,2,4,5,"Scenario A"  
198,1,2,2,3,1,5,4,2,1,3,2,4,2,5,"Scenario A"  
196,2,1,2,2,3,2,1,1,2,3,2,1,5,4,"Scenario B"  
196,1,2,2,3,2,1,5,2,1,1,1,4,3,3,"Scenario A"  
196,2,2,1,1,2,4,5,1,2,2,2,3,1,1,"Scenario B"  
196,1,1,3,3,1,4,1,2,2,1,2,4,3,2,"Scenario B"  
196,2,1,2,1,4,2,3,1,1,3,3,1,5,3,"Scenario B"  
196,2,2,3,1,1,1,1,1,1,1,3,3,3,4,"Scenario A"  
196,1,2,1,2,3,2,4,2,1,2,2,2,5,3,"Scenario A"  
196,2,2,3,3,4,3,5,2,1,2,1,3,5,2,"Scenario A"

196,1,2,1,1,2,4,5,2,1,3,3,4,2,4,"Scenario B"  
196,1,1,2,2,2,1,1,2,2,3,1,1,1,2,"Scenario B"  
197,1,2,2,2,4,3,2,1,1,1,3,3,4,3,"Scenario B"  
197,2,1,3,1,2,5,4,1,2,1,3,4,2,1,"Scenario B"  
197,1,1,1,3,1,4,5,2,2,2,2,2,3,5,"Scenario A"  
197,2,1,2,2,1,4,1,1,2,2,1,3,1,2,"Scenario A"  
197,1,1,3,2,2,2,3,2,2,3,3,1,2,4,"Scenario A"  
197,2,1,1,1,4,1,2,1,2,3,2,2,5,3,"Scenario B"  
197,2,1,1,2,1,4,4,1,2,3,1,3,3,5,"Scenario B"  
197,2,2,2,3,3,5,4,1,2,2,3,4,4,1,"Scenario B"  
197,1,1,2,1,4,3,5,2,1,1,2,3,5,1,"Scenario B"  
197,1,1,3,1,1,1,2,2,2,3,3,2,4,1,"Scenario B"  
199,2,1,2,3,1,3,1,1,2,1,1,1,2,2,"Scenario A"  
199,1,1,2,1,2,2,3,2,2,3,2,4,1,2,"Scenario A"  
199,2,1,3,2,3,5,5,1,2,1,3,4,4,4,"Scenario B"  
199,1,2,3,3,1,4,3,2,1,1,1,2,1,4,"Scenario B"  
199,1,1,2,1,4,5,5,2,2,1,2,3,4,1,"Scenario A"  
199,2,1,2,3,1,1,3,1,2,2,1,2,3,1,"Scenario A"  
199,1,2,1,2,1,3,4,2,1,3,3,3,5,1,"Scenario A"  
199,2,2,3,2,1,1,5,1,1,2,3,4,2,2,"Scenario A"  
199,2,2,3,1,2,4,2,1,1,1,2,2,2,5,"Scenario A"  
199,2,2,1,1,3,3,4,1,1,2,3,1,3,5,"Scenario A"  
420,1,1,3,3,3,1,2,1,2,2,3,2,2,5,"Scenario A"  
420,1,2,3,2,1,1,4,2,1,2,3,4,5,3,"Scenario B"  
420,2,2,1,2,3,4,2,1,1,3,1,1,4,5,"Scenario B"  
420,1,2,1,1,3,2,1,2,1,1,2,4,3,1,"Scenario A"  
420,1,2,2,2,2,3,2,2,2,3,1,4,5,1,"Scenario A"  
420,2,1,2,1,2,1,4,1,1,1,3,2,5,2,"Scenario A"  
420,2,1,1,3,1,2,1,1,2,3,2,4,3,4,"Scenario A"  
420,1,1,3,3,1,5,2,2,2,2,1,3,1,3,"Scenario B"  
420,1,1,2,2,3,3,3,2,2,3,1,2,4,5,"Scenario B"  
420,1,2,2,3,1,5,4,2,1,3,2,4,2,5,"Scenario A"  
194,2,1,2,2,3,2,1,1,2,3,2,1,5,4,"Scenario B"  
194,1,2,2,3,2,1,5,2,1,1,1,4,3,3,"Scenario A"  
194,2,2,1,1,2,4,5,1,2,2,2,3,1,1,"Scenario B"  
194,1,1,3,3,1,4,1,2,2,1,2,4,3,2,"Scenario A"  
194,2,1,2,1,4,2,3,1,1,3,3,1,5,3,"Scenario B"  
194,2,2,3,1,1,1,1,1,1,1,3,3,3,4,"Scenario A"  
194,1,2,1,2,3,2,4,2,1,2,2,2,5,3,"Scenario A"  
194,2,2,3,3,4,3,5,2,1,2,1,3,5,2,"Scenario A"  
194,1,2,1,1,2,4,5,2,1,3,3,4,2,4,"Scenario A"  
194,1,1,2,2,2,1,1,2,2,3,1,1,1,2,"Scenario B"  
192,1,2,2,2,4,3,2,1,1,1,3,3,4,3,"Scenario A"  
192,2,1,3,1,2,5,4,1,2,1,3,4,2,1,"Scenario A"  
192,1,1,1,3,1,4,5,2,2,2,2,2,3,5,"Scenario A"  
192,2,1,2,2,1,4,1,1,2,2,1,3,1,2,"Scenario A"  
192,1,1,3,2,2,2,3,2,2,3,3,1,2,4,"Scenario A"  
192,2,1,1,1,4,1,2,1,2,3,2,2,5,3,"Scenario B"  
192,2,1,1,2,1,4,4,1,2,3,1,3,3,5,"Scenario B"  
192,2,2,2,3,3,5,4,1,2,2,3,4,4,1,"Scenario B"  
192,1,1,2,1,4,3,5,2,1,1,2,3,5,1,"Scenario A"  
192,1,1,3,1,1,1,2,2,2,3,3,2,4,1,"Scenario A"  
195,2,1,2,3,1,3,1,1,2,1,1,1,2,2,"Scenario A"  
195,1,1,2,1,2,2,3,2,2,3,2,4,1,2,"Scenario A"  
195,2,1,3,2,3,5,5,1,2,1,3,4,4,4,"Scenario A"  
195,1,2,3,3,1,4,3,2,1,1,1,2,1,4,"Scenario B"  
195,1,1,2,1,4,5,5,2,2,1,2,3,4,1,"Scenario A"

195,2,1,2,3,1,1,3,1,2,2,1,2,3,1,"Scenario A"  
195,1,2,1,2,1,3,4,2,1,3,3,3,5,1,"Scenario B"  
195,2,2,3,2,1,1,5,1,1,2,3,4,2,2,"Scenario B"  
195,2,2,3,1,2,4,2,1,1,1,2,2,2,5,"Scenario A"  
195,2,2,1,1,3,3,4,1,1,2,3,1,3,5,"Scenario A"  
200,1,1,3,3,3,1,2,1,2,2,3,2,2,5,"Scenario B"  
200,1,2,3,2,1,1,4,2,1,2,3,4,5,3,"Scenario B"  
200,2,2,1,2,3,4,2,1,1,3,1,1,4,5,"Scenario B"  
200,1,2,1,1,3,2,1,2,1,1,2,4,3,1,"Scenario B"  
200,1,2,2,2,2,3,2,2,2,3,1,4,5,1,"Scenario B"  
200,2,1,2,1,2,1,4,1,1,1,3,2,5,2,"Scenario A"  
200,2,1,1,3,1,2,1,1,2,3,2,4,3,4,"Scenario A"  
200,1,1,3,3,1,5,2,2,2,2,1,3,1,3,"Scenario A"  
200,1,1,2,2,3,3,3,2,2,3,1,2,4,5,"Scenario A"  
200,1,2,2,3,1,5,4,2,1,3,2,4,2,5,"Scenario B"  
421,2,1,2,2,3,2,1,1,2,3,2,1,5,4,"Scenario A"  
421,1,2,2,3,2,1,5,2,1,1,1,4,3,3,"Scenario B"  
421,2,2,1,1,2,4,5,1,2,2,2,3,1,1,"Scenario B"  
421,1,1,3,3,1,4,1,2,2,1,2,4,3,2,"Scenario A"  
421,2,1,2,1,4,2,3,1,1,3,3,1,5,3,"Scenario A"  
421,2,2,3,1,1,1,1,1,1,1,3,3,3,4,"Scenario A"  
421,1,2,1,2,3,2,4,2,1,2,2,2,5,3,"Scenario A"  
421,2,2,3,3,4,3,5,2,1,2,1,3,5,2,"Scenario B"  
421,1,2,1,1,2,4,5,2,1,3,3,4,2,4,"Scenario A"  
421,1,1,2,2,2,1,1,2,2,3,1,1,1,2,"Scenario A"  
435,1,2,2,2,4,3,2,1,1,1,3,3,4,3,"Scenario B"  
435,2,1,3,1,2,5,4,1,2,1,3,4,2,1,"Scenario A"  
435,1,1,1,3,1,4,5,2,2,2,2,2,3,5,"Scenario A"  
435,2,1,2,2,1,4,1,1,2,2,1,3,1,2,"Scenario B"  
435,1,1,3,2,2,2,3,2,2,3,3,1,2,4,"Scenario B"  
435,2,1,1,1,4,1,2,1,2,3,2,2,5,3,"Scenario A"  
435,2,1,1,2,1,4,4,1,2,3,1,3,3,5,"Scenario A"  
435,2,2,2,3,3,5,4,1,2,2,3,4,4,1,"Scenario A"  
435,1,1,2,1,4,3,5,2,1,1,2,3,5,1,"Scenario A"  
435,1,1,3,1,1,1,2,2,2,3,3,2,4,1,"Scenario A"  
436,2,1,2,3,1,3,1,1,2,1,1,1,2,2,"Scenario A"  
436,1,1,2,1,2,2,3,2,2,3,2,4,1,2,"Scenario B"  
436,2,1,3,2,3,5,5,1,2,1,3,4,4,4,"Scenario B"  
436,1,2,3,3,1,4,3,2,1,1,1,2,1,4,"Scenario A"  
436,1,1,2,1,4,5,5,2,2,1,2,3,4,1,"Scenario B"  
436,2,1,2,3,1,1,3,1,2,2,1,2,3,1,"Scenario A"  
436,1,2,1,2,1,3,4,2,1,3,3,3,5,1,"Scenario A"  
436,2,2,3,2,1,1,5,1,1,2,3,4,2,2,"Scenario A"  
436,2,2,3,1,2,4,2,1,1,1,2,2,2,5,"Scenario B"  
436,2,2,1,1,3,3,4,1,1,2,3,1,3,5,"Scenario A"  
419,1,1,3,3,3,1,2,1,2,2,3,2,2,5,"Scenario A"  
419,1,2,3,2,1,1,4,2,1,2,3,4,5,3,"Scenario A"  
419,2,2,1,2,3,4,2,1,1,3,1,1,4,5,"Scenario B"  
419,1,2,1,1,3,2,1,2,1,1,2,4,3,1,"Scenario A"  
419,1,2,2,2,2,3,2,2,2,3,1,4,5,1,"Scenario A"  
419,2,1,2,1,2,1,4,1,1,1,3,2,5,2,"Scenario B"  
419,2,1,1,3,1,2,1,1,2,3,2,4,3,4,"Scenario B"  
419,1,1,3,3,1,5,2,2,2,2,1,3,1,3,"Scenario A"  
419,1,1,2,2,3,3,3,2,2,3,1,2,4,5,"Scenario A"  
419,1,2,2,3,1,5,4,2,1,3,2,4,2,5,"Scenario B"  
463,2,1,2,2,3,2,1,1,2,3,2,1,5,4,"Scenario A"  
463,1,2,2,3,2,1,5,2,1,1,1,4,3,3,"Scenario A"

463,2,2,1,1,2,4,5,1,2,2,2,3,1,1,"Scenario B"  
463,1,1,3,3,1,4,1,2,2,1,2,4,3,2,"Scenario A"  
463,2,1,2,1,4,2,3,1,1,3,3,1,5,3,"Scenario A"  
463,2,2,3,1,1,1,1,1,1,1,3,3,3,4,"Scenario A"  
463,1,2,1,2,3,2,4,2,1,2,2,2,5,3,"Scenario B"  
463,2,2,3,3,4,3,5,2,1,2,1,3,5,2,"Scenario A"  
463,1,2,1,1,2,4,5,2,1,3,3,4,2,4,"Scenario A"  
463,1,1,2,2,2,1,1,2,2,3,1,1,1,2,"Scenario B"  
316,1,2,2,2,4,3,2,1,1,1,3,3,4,3,"Scenario B"  
316,2,1,3,1,2,5,4,1,2,1,3,4,2,1,"Scenario B"  
316,1,1,1,3,1,4,5,2,2,2,2,2,3,5,"Scenario A"  
316,2,1,2,2,1,4,1,1,2,2,1,3,1,2,"Scenario B"  
316,1,1,3,2,2,2,3,2,2,3,3,1,2,4,"Scenario A"  
316,2,1,1,1,4,1,2,1,2,3,2,2,5,3,"Scenario A"  
316,2,1,1,2,1,4,4,1,2,3,1,3,3,5,"Scenario A"  
316,2,2,2,3,3,5,4,1,2,2,3,4,4,1,"Scenario B"  
316,1,1,2,1,4,3,5,2,1,1,2,3,5,1,"Scenario A"  
316,1,1,3,1,1,1,2,2,2,3,3,2,4,1,"Scenario B"  
273,2,1,2,3,1,3,1,1,2,1,1,1,2,2,"Scenario A"  
273,1,1,2,1,2,2,3,2,2,3,2,4,1,2,"Scenario B"  
273,2,1,3,2,3,5,5,1,2,1,3,4,4,4,"Scenario B"  
273,1,2,3,3,1,4,3,2,1,1,1,2,1,4,"Scenario A"  
273,1,1,2,1,4,5,5,2,2,1,2,3,4,1,"Scenario B"  
273,2,1,2,3,1,1,3,1,2,2,1,2,3,1,"Scenario A"  
273,1,2,1,2,1,3,4,2,1,3,3,3,5,1,"Scenario B"  
273,2,2,3,2,1,1,5,1,1,2,3,4,2,2,"Scenario B"  
273,2,2,3,1,2,4,2,1,1,1,2,2,2,5,"Scenario A"  
273,2,2,1,1,3,3,4,1,1,2,3,1,3,5,"Scenario A"  
207,1,1,3,3,3,1,2,1,2,2,3,2,2,5,"Scenario A"  
207,1,2,3,2,1,1,4,2,1,2,3,4,5,3,"Scenario B"  
207,2,2,1,2,3,4,2,1,1,3,1,1,4,5,"Scenario A"  
207,1,2,1,1,3,2,1,2,1,1,2,4,3,1,"Scenario B"  
207,1,2,2,2,2,3,2,2,2,3,1,4,5,1,"Scenario A"  
207,2,1,2,1,2,1,4,1,1,1,3,2,5,2,"Scenario B"  
207,2,1,1,3,1,2,1,1,2,3,2,4,3,4,"Scenario B"  
207,1,1,3,3,1,5,2,2,2,2,1,3,1,3,"Scenario A"  
207,1,1,2,2,3,3,3,2,2,3,1,2,4,5,"Scenario A"  
207,1,2,2,3,1,5,4,2,1,3,2,4,2,5,"Scenario B"  
270,2,1,2,2,3,2,1,1,2,3,2,1,5,4,"Scenario B"  
270,1,2,2,3,2,1,5,2,1,1,1,4,3,3,"Scenario A"  
270,2,2,1,1,2,4,5,1,2,2,2,3,1,1,"Scenario B"  
270,1,1,3,3,1,4,1,2,2,1,2,4,3,2,"Scenario A"  
270,2,1,2,1,4,2,3,1,1,3,3,1,5,3,"Scenario B"  
270,2,2,3,1,1,1,1,1,1,1,3,3,3,4,"Scenario B"  
270,1,2,1,2,3,2,4,2,1,2,2,2,5,3,"Scenario B"  
270,2,2,3,3,4,3,5,2,1,2,1,3,5,2,"Scenario A"  
270,1,2,1,1,2,4,5,2,1,3,3,4,2,4,"Scenario B"  
270,1,1,2,2,2,1,1,2,2,3,1,1,1,2,"Scenario A"  
272,1,2,2,2,4,3,2,1,1,1,3,3,4,3,"Scenario A"  
272,2,1,3,1,2,5,4,1,2,1,3,4,2,1,"Scenario A"  
272,1,1,1,3,1,4,5,2,2,2,2,2,3,5,"Scenario B"  
272,2,1,2,2,1,4,1,1,2,2,1,3,1,2,"Scenario B"  
272,1,1,3,2,2,2,3,2,2,3,3,1,2,4,"Scenario B"  
272,2,1,1,1,4,1,2,1,2,3,2,2,5,3,"Scenario B"  
272,2,1,1,2,1,4,4,1,2,3,1,3,3,5,"Scenario B"  
272,2,2,2,3,3,5,4,1,2,2,3,4,4,1,"Scenario B"  
272,1,1,2,1,4,3,5,2,1,1,2,3,5,1,"Scenario B"

272,1,1,3,1,1,1,2,2,2,3,3,2,4,1,"Scenario B"  
289,2,1,2,3,1,3,1,1,2,1,1,1,2,2,"Scenario A"  
289,1,1,2,1,2,2,3,2,2,3,2,4,1,2,"Scenario A"  
289,2,1,3,2,3,5,5,1,2,1,3,4,4,4,"Scenario B"  
289,1,2,3,3,1,4,3,2,1,1,1,2,1,4,"Scenario A"  
289,1,1,2,1,4,5,5,2,2,1,2,3,4,1,"Scenario B"  
289,2,1,2,3,1,1,3,1,2,2,1,2,3,1,"Scenario A"  
289,1,2,1,2,1,3,4,2,1,3,3,3,5,1,"Scenario A"  
289,2,2,3,2,1,1,5,1,1,2,3,4,2,2,"Scenario A"  
289,2,2,3,1,2,4,2,1,1,1,2,2,2,5,"Scenario A"  
289,2,2,1,1,3,3,4,1,1,2,3,1,3,5,"Scenario B"  
243,1,1,3,3,3,1,2,1,2,2,3,2,2,5,"Scenario A"  
243,1,2,3,2,1,1,4,2,1,2,3,4,5,3,"Scenario A"  
243,2,2,1,2,3,4,2,1,1,3,1,1,4,5,"Scenario A"  
243,1,2,1,1,3,2,1,2,1,1,2,4,3,1,"Scenario A"  
243,1,2,2,2,2,3,2,2,2,3,1,4,5,1,"Scenario A"  
243,2,1,2,1,2,1,4,1,1,1,3,2,5,2,"Scenario B"  
243,2,1,1,3,1,2,1,1,2,3,2,4,3,4,"Scenario B"  
243,1,1,3,3,1,5,2,2,2,2,1,3,1,3,"Scenario B"  
243,1,1,2,2,3,3,3,2,2,3,1,2,4,5,"Scenario B"  
243,1,2,2,3,1,5,4,2,1,3,2,4,2,5,"Scenario A"  
242,2,1,2,2,3,2,1,1,2,3,2,1,5,4,"Scenario A"  
242,1,2,2,3,2,1,5,2,1,1,1,4,3,3,"Scenario B"  
242,2,2,1,1,2,4,5,1,2,2,2,3,1,1,"Scenario B"  
242,1,1,3,3,1,4,1,2,2,1,2,4,3,2,"Scenario A"  
242,2,1,2,1,4,2,3,1,1,3,3,1,5,3,"Scenario B"  
242,2,2,3,1,1,1,1,1,1,1,3,3,3,4,"Scenario A"  
242,1,2,1,2,3,2,4,2,1,2,2,2,5,3,"Scenario B"  
242,2,2,3,3,4,3,5,2,1,2,1,3,5,2,"Scenario A"  
242,1,2,1,1,2,2,4,5,2,1,3,3,4,2,4,"Scenario A"  
242,1,1,2,2,2,1,1,2,2,3,1,1,1,2,"Scenario A"  
363,1,2,2,2,4,3,2,1,1,1,3,3,4,3,"Scenario A"  
363,2,1,3,1,2,5,4,1,2,1,3,4,2,1,"Scenario B"  
363,1,1,1,3,1,4,5,2,2,2,2,2,3,5,"Scenario B"  
363,2,1,2,2,1,4,1,1,2,2,1,3,1,2,"Scenario A"  
363,1,1,3,2,2,2,3,2,2,3,3,1,2,4,"Scenario B"  
363,2,1,1,1,4,1,2,1,2,3,2,2,5,3,"Scenario B"  
363,2,1,1,2,1,4,4,1,2,3,1,3,3,5,"Scenario A"  
363,2,2,2,3,3,5,4,1,2,2,3,4,4,1,"Scenario A"  
363,1,1,2,1,4,3,5,2,1,1,2,3,5,1,"Scenario B"  
363,1,1,3,1,1,1,2,2,2,3,3,2,4,1,"Scenario B"  
360,2,1,2,3,1,3,1,1,2,1,1,1,2,2,"Scenario A"  
360,1,1,2,1,2,2,3,2,2,3,2,4,1,2,"Scenario B"  
360,2,1,3,2,3,5,5,1,2,1,3,4,4,4,"Scenario A"  
360,1,2,3,3,1,4,3,2,1,1,1,2,1,4,"Scenario A"  
360,1,1,2,1,4,5,5,2,2,1,2,3,4,1,"Scenario B"  
360,2,1,2,3,1,1,3,1,2,2,1,2,3,1,"Scenario B"  
360,1,2,1,2,1,3,4,2,1,3,3,3,5,1,"Scenario B"  
360,2,2,3,2,1,1,5,1,1,2,3,4,2,2,"Scenario A"  
360,2,2,3,1,2,4,2,1,1,1,2,2,2,5,"Scenario A"  
360,2,2,1,1,3,3,4,1,1,2,3,1,3,5,"Scenario A"  
361,1,1,3,3,3,1,2,1,2,2,3,2,2,5,"Scenario A"  
361,1,2,3,2,1,1,4,2,1,2,3,4,5,3,"Scenario B"  
361,2,2,1,2,3,4,2,1,1,3,1,1,4,5,"Scenario A"  
361,1,2,1,1,3,2,1,2,1,1,2,4,3,1,"Scenario A"  
361,1,2,2,2,2,3,2,2,2,3,1,4,5,1,"Scenario B"  
361,2,1,2,1,2,1,4,1,1,1,3,2,5,2,"Scenario B"

361,2,1,1,3,1,2,1,1,2,3,2,4,3,4,"Scenario A"  
361,1,1,3,3,1,5,2,2,2,2,1,3,1,3,"Scenario A"  
361,1,1,2,2,3,3,3,2,2,3,1,2,4,5,"Scenario A"  
361,1,2,2,3,1,5,4,2,1,3,2,4,2,5,"Scenario A"  
201,2,1,2,2,3,2,1,1,2,3,2,1,5,4,"Scenario A"  
201,1,2,2,3,2,1,5,2,1,1,1,4,3,3,"Scenario B"  
201,2,2,1,1,2,4,5,1,2,2,2,3,1,1,"Scenario B"  
201,1,1,3,3,1,4,1,2,2,1,2,4,3,2,"Scenario A"  
201,2,1,2,1,4,2,3,1,1,3,3,1,5,3,"Scenario B"  
201,2,2,3,1,1,1,1,1,1,1,3,3,3,4,"Scenario A"  
201,1,2,1,2,3,2,4,2,1,2,2,2,5,3,"Scenario B"  
201,2,2,3,3,4,3,5,2,1,2,1,3,5,2,"Scenario B"  
201,1,2,1,1,2,4,5,2,1,3,3,4,2,4,"Scenario B"  
201,1,1,2,2,2,1,1,2,2,3,1,1,1,2,"Scenario A"  
202,1,2,2,2,4,3,2,1,1,1,3,3,4,3,"Scenario A"  
202,2,1,3,1,2,5,4,1,2,1,3,4,2,1,"Scenario B"  
202,1,1,1,3,1,4,5,2,2,2,2,2,3,5,"Scenario B"  
202,2,1,2,2,1,4,1,1,2,2,1,3,1,2,"Scenario A"  
202,1,1,3,2,2,2,3,2,2,3,3,1,2,4,"Scenario A"  
202,2,1,1,1,4,1,2,1,2,3,2,2,5,3,"Scenario A"  
202,2,1,1,2,1,4,4,1,2,3,1,3,3,5,"Scenario A"  
202,2,2,2,3,3,5,4,1,2,2,3,4,4,1,"Scenario B"  
202,1,1,2,1,4,3,5,2,1,1,2,3,5,1,"Scenario B"  
202,1,1,3,1,1,1,2,2,2,3,3,2,4,1,"Scenario B"  
214,2,1,2,3,1,3,1,1,2,1,1,1,2,2,"Scenario A"  
214,1,1,2,1,2,2,3,2,2,3,2,4,1,2,"Scenario B"  
214,2,1,3,2,3,5,5,1,2,1,3,4,4,4,"Scenario A"  
214,1,2,3,3,1,4,3,2,1,1,1,2,1,4,"Scenario A"  
214,1,1,2,1,4,5,5,2,2,1,2,3,4,1,"Scenario B"  
214,2,1,2,3,1,1,3,1,2,2,1,2,3,1,"Scenario A"  
214,1,2,1,2,1,1,3,4,2,1,3,3,3,5,1,"Scenario B"  
214,2,2,3,2,1,1,5,1,1,2,3,4,2,2,"Scenario B"  
214,2,2,3,1,2,4,2,1,1,1,2,2,2,5,"Scenario A"  
214,2,2,1,1,3,3,4,1,1,2,3,1,3,5,"Scenario B"  
208,1,1,3,3,3,1,2,1,2,2,3,2,2,5,"Scenario B"  
208,1,2,3,2,1,1,4,2,1,2,3,4,5,3,"Scenario B"  
208,2,2,1,2,3,4,2,1,1,3,1,1,4,5,"Scenario A"  
208,1,2,1,1,3,2,1,2,1,1,2,4,3,1,"Scenario B"  
208,1,2,2,2,2,3,2,2,2,3,1,4,5,1,"Scenario B"  
208,2,1,2,1,2,1,4,1,1,1,3,2,5,2,"Scenario A"  
208,2,1,1,3,1,2,1,1,2,3,2,4,3,4,"Scenario B"  
208,1,1,3,3,1,5,2,2,2,2,1,3,1,3,"Scenario A"  
208,1,1,2,2,3,3,3,2,2,3,1,2,4,5,"Scenario B"  
208,1,2,2,3,1,5,4,2,1,3,2,4,2,5,"Scenario A"  
216,2,1,2,2,3,2,1,1,2,3,2,1,5,4,"Scenario A"  
216,1,2,2,3,2,1,5,2,1,1,1,4,3,3,"Scenario A"  
216,2,2,1,1,2,4,5,1,2,2,2,3,1,1,"Scenario A"  
216,1,1,3,3,1,4,1,2,2,1,2,4,3,2,"Scenario A"  
216,2,1,2,1,4,2,3,1,1,3,3,1,5,3,"Scenario A"  
216,2,2,3,1,1,1,1,1,1,1,3,3,3,4,"Scenario A"  
216,1,2,1,2,3,2,4,2,1,2,2,2,5,3,"Scenario A"  
216,2,2,3,3,4,3,5,2,1,2,1,3,5,2,"Scenario A"  
216,1,2,1,1,2,4,5,2,1,3,3,4,2,4,"Scenario A"  
216,1,1,2,2,2,1,1,2,2,3,1,1,1,2,"Scenario A"  
205,1,2,2,2,4,3,2,1,1,1,3,3,4,3,"Scenario A"  
205,2,1,3,1,2,5,4,1,2,1,3,4,2,1,"Scenario B"  
205,1,1,1,3,1,4,5,2,2,2,2,2,3,5,"Scenario A"



205,2,1,2,2,1,4,1,1,2,2,1,3,1,2,"Scenario A"  
205,1,1,3,2,2,2,3,2,2,3,3,1,2,4,"Scenario A"  
205,2,1,1,1,4,1,2,1,2,3,2,2,5,3,"Scenario A"  
205,2,1,1,2,1,4,4,1,2,3,1,3,3,5,"Scenario A"  
205,2,2,2,3,3,5,4,1,2,2,3,4,4,1,"Scenario B"  
205,1,1,2,1,4,3,5,2,1,1,2,3,5,1,"Scenario B"  
205,1,1,3,1,1,1,2,2,2,3,3,2,4,1,"Scenario B"  
212,2,1,2,3,1,3,1,1,2,1,1,1,2,2,"Scenario A"  
212,1,1,2,1,2,2,3,2,2,3,2,4,1,2,"Scenario B"  
212,2,1,3,2,3,5,5,1,2,1,3,4,4,4,"Scenario A"  
212,1,2,3,3,1,4,3,2,1,1,1,2,1,4,"Scenario A"  
212,1,1,2,1,4,5,5,2,2,1,2,3,4,1,"Scenario B"  
212,2,1,2,3,1,1,3,1,2,2,1,2,3,1,"Scenario A"  
212,1,2,1,2,1,3,4,2,1,3,3,3,5,1,"Scenario B"  
212,2,2,3,2,1,1,5,1,1,2,3,4,2,2,"Scenario A"  
212,2,2,3,1,2,4,2,1,1,1,2,2,2,5,"Scenario A"  
212,2,2,1,1,3,3,4,1,1,2,3,1,3,5,"Scenario B"  
206,1,1,3,3,3,1,2,1,2,2,3,2,2,5,"Scenario A"  
206,1,2,3,2,1,1,4,2,1,2,3,4,5,3,"Scenario A"  
206,2,2,1,2,3,4,2,1,1,3,1,1,4,5,"Scenario A"  
206,1,2,1,1,3,2,1,2,1,1,2,4,3,1,"Scenario B"  
206,1,2,2,2,2,3,2,2,2,3,1,4,5,1,"Scenario B"  
206,2,1,2,1,2,1,4,1,1,1,3,2,5,2,"Scenario B"  
206,2,1,1,3,1,2,1,1,2,3,2,4,3,4,"Scenario A"  
206,1,1,3,3,1,5,2,2,2,2,1,3,1,3,"Scenario A"  
206,1,1,2,2,3,3,3,2,2,3,1,2,4,5,"Scenario A"  
206,1,2,2,3,1,5,4,2,1,3,2,4,2,5,"Scenario A"  
215,2,1,2,2,3,2,1,1,2,3,2,1,5,4,"Scenario B"  
215,1,2,2,3,2,1,5,2,1,1,1,4,3,3,"Scenario B"  
215,2,2,1,1,2,4,5,1,2,2,2,3,1,1,"Scenario A"  
215,1,1,3,3,1,4,1,2,2,1,2,4,3,2,"Scenario A"  
215,2,1,2,1,4,2,3,1,1,3,3,1,5,3,"Scenario A"  
215,2,2,3,1,1,1,1,1,1,1,3,3,3,4,"Scenario A"  
215,1,2,1,2,3,2,4,2,1,2,2,2,5,3,"Scenario A"  
215,2,2,3,3,4,3,5,2,1,2,1,3,5,2,"Scenario A"  
215,1,2,1,1,2,4,5,2,1,3,3,4,2,4,"Scenario B"  
215,1,1,2,2,2,1,1,2,2,3,1,1,1,2,"Scenario A"  
217,1,2,2,2,4,3,2,1,1,1,3,3,4,3,"Scenario B"  
217,2,1,3,1,2,5,4,1,2,1,3,4,2,1,"Scenario B"  
217,1,1,1,3,1,4,5,2,2,2,2,2,3,5,"Scenario B"  
217,2,1,2,2,1,4,1,1,2,2,1,3,1,2,"Scenario B"  
217,1,1,3,2,2,2,3,2,2,3,3,1,2,4,"Scenario B"  
217,2,1,1,1,4,1,2,1,2,3,2,2,5,3,"Scenario B"  
217,2,1,1,2,1,4,4,1,2,3,1,3,3,5,"Scenario B"  
217,2,2,2,3,3,5,4,1,2,2,3,4,4,1,"Scenario B"  
217,1,1,2,1,4,3,5,2,1,1,2,3,5,1,"Scenario A"  
217,1,1,3,1,1,1,2,2,2,3,3,2,4,1,"Scenario B"  
148,2,1,2,3,1,3,1,1,2,1,1,1,2,2,"Scenario A"  
148,1,1,2,1,2,1,2,2,3,2,2,3,2,4,1,2,"Scenario B"  
148,2,1,3,2,3,5,5,1,2,1,3,4,4,4,"Scenario A"  
148,1,2,3,3,1,4,3,2,1,1,1,2,1,4,"Scenario A"  
148,1,1,2,1,4,5,5,2,2,1,2,3,4,1,"Scenario B"  
148,2,1,2,3,1,1,3,1,2,2,1,2,3,1,"Scenario A"  
148,1,2,1,2,1,3,4,2,1,3,3,3,5,1,"Scenario A"  
148,2,2,3,2,1,1,5,1,1,2,3,4,2,2,"Scenario A"  
148,2,2,3,1,2,4,2,1,1,1,2,2,2,5,"Scenario B"  
148,2,2,1,1,3,3,4,1,1,2,3,1,3,5,"Scenario B"

141,1,1,3,3,3,1,2,1,2,2,3,2,2,5,"Scenario A"  
141,1,2,3,2,1,1,4,2,1,2,3,4,5,3,"Scenario A"  
141,2,2,1,2,3,4,2,1,1,3,1,1,4,5,"Scenario B"  
141,1,2,1,1,3,2,1,2,1,1,2,4,3,1,"Scenario A"  
141,1,2,2,2,2,3,2,2,2,3,1,4,5,1,"Scenario A"  
141,2,1,2,1,2,1,4,1,1,1,3,2,5,2,"Scenario A"  
141,2,1,1,3,1,2,1,1,2,3,2,4,3,4,"Scenario A"  
141,1,1,3,3,1,5,2,2,2,2,1,3,1,3,"Scenario A"  
141,1,1,2,2,3,3,3,2,2,3,1,2,4,5,"Scenario B"  
141,1,2,2,3,1,5,4,2,1,3,2,4,2,5,"Scenario A"  
152,2,1,2,2,3,2,1,1,2,3,2,1,5,4,"Scenario B"  
152,1,2,2,3,2,1,5,2,1,1,1,4,3,3,"Scenario A"  
152,2,2,1,1,2,4,5,1,2,2,2,3,1,1,"Scenario B"  
152,1,1,3,3,1,4,1,2,2,1,2,4,3,2,"Scenario B"  
152,2,1,2,1,4,2,3,1,1,3,3,1,5,3,"Scenario B"  
152,2,2,3,1,1,1,1,1,1,1,3,3,3,4,"Scenario A"  
152,1,2,1,2,3,2,4,2,1,2,2,2,5,3,"Scenario B"  
152,2,2,3,3,4,3,5,2,1,2,1,3,5,2,"Scenario A"  
152,1,2,1,1,2,4,5,2,1,3,3,4,2,4,"Scenario A"  
152,1,1,2,2,2,1,1,2,2,3,1,1,1,2,"Scenario A"  
147,1,2,2,2,4,3,2,1,1,1,3,3,4,3,"Scenario A"  
147,2,1,3,1,2,5,4,1,2,1,3,4,2,1,"Scenario B"  
147,1,1,1,3,1,4,5,2,2,2,2,2,3,5,"Scenario A"  
147,2,1,2,2,1,4,1,1,2,2,1,3,1,2,"Scenario A"  
147,1,1,3,2,2,2,3,2,2,3,3,1,2,4,"Scenario B"  
147,2,1,1,1,4,1,2,1,2,3,2,2,5,3,"Scenario A"  
147,2,1,1,2,1,4,4,1,2,3,1,3,3,5,"Scenario B"  
147,2,2,2,3,3,5,4,1,2,2,3,4,4,1,"Scenario B"  
147,1,1,2,1,4,3,5,2,1,1,2,3,5,1,"Scenario B"  
147,1,1,3,1,1,1,2,2,2,3,3,2,4,1,"Scenario B"  
146,2,1,2,3,1,3,1,1,2,1,1,1,2,2,"Scenario A"  
146,1,1,2,1,2,2,3,2,2,3,2,4,1,2,"Scenario B"  
146,2,1,3,2,3,5,5,1,2,1,3,4,4,4,"Scenario A"  
146,1,2,3,3,1,4,3,2,1,1,1,2,1,4,"Scenario A"  
146,1,1,2,1,4,5,5,2,2,1,2,3,4,1,"Scenario B"  
146,2,1,2,3,1,1,3,1,2,2,1,2,3,1,"Scenario A"  
146,1,2,1,2,1,3,4,2,1,3,3,3,5,1,"Scenario B"  
146,2,2,3,2,1,1,5,1,1,2,3,4,2,2,"Scenario A"  
146,2,2,3,1,2,4,2,1,1,1,2,2,2,5,"Scenario A"  
146,2,2,1,1,3,3,4,1,1,2,3,1,3,5,"Scenario B"  
151,1,1,3,3,3,1,2,1,2,2,3,2,2,5,"Scenario B"  
151,1,2,3,2,1,1,4,2,1,2,3,4,5,3,"Scenario A"  
151,2,2,1,2,3,4,2,1,1,3,1,1,4,5,"Scenario A"  
151,1,2,1,1,3,2,1,2,1,1,2,4,3,1,"Scenario A"  
151,1,2,2,2,2,3,2,2,2,3,1,4,5,1,"Scenario B"  
151,2,1,2,1,2,1,4,1,1,1,3,2,5,2,"Scenario A"  
151,2,1,1,3,1,2,1,1,2,3,2,4,3,4,"Scenario B"  
151,1,1,3,3,1,5,2,2,2,2,1,3,1,3,"Scenario B"  
151,1,1,2,2,3,3,3,2,2,3,1,2,4,5,"Scenario B"  
151,1,2,2,3,1,5,4,2,1,3,2,4,2,5,"Scenario A"  
211,2,1,2,2,3,2,1,1,2,3,2,1,5,4,"Scenario A"  
211,1,2,2,3,2,1,5,2,1,1,1,4,3,3,"Scenario B"  
211,2,2,1,1,2,4,5,1,2,2,2,3,1,1,"Scenario B"  
211,1,1,3,3,1,4,1,2,2,1,2,4,3,2,"Scenario A"  
211,2,1,2,1,4,2,3,1,1,3,3,1,5,3,"Scenario A"  
211,2,2,3,1,1,1,1,1,1,1,3,3,3,4,"Scenario A"  
211,1,2,1,2,3,2,4,2,1,2,2,2,5,3,"Scenario B"

211,2,2,3,3,4,3,5,2,1,2,1,3,5,2,"Scenario B"  
211,1,2,1,1,2,4,5,2,1,3,3,4,2,4,"Scenario B"  
211,1,1,2,2,2,1,1,2,2,3,1,1,1,2,"Scenario A"  
362,1,2,2,2,4,3,2,1,1,1,3,3,4,3,"Scenario B"  
362,2,1,3,1,2,5,4,1,2,1,3,4,2,1,"Scenario B"  
362,1,1,1,3,1,4,5,2,2,2,2,2,3,5,"Scenario A"  
362,2,1,2,2,1,4,1,1,2,2,1,3,1,2,"Scenario A"  
362,1,1,3,2,2,2,3,2,2,3,3,1,2,4,"Scenario B"  
362,2,1,1,1,4,1,2,1,2,3,2,2,5,3,"Scenario B"  
362,2,1,1,2,1,4,4,1,2,3,1,3,3,5,"Scenario A"  
362,2,2,2,3,3,5,4,1,2,2,3,4,4,1,"Scenario A"  
362,1,1,2,1,4,3,5,2,1,1,2,3,5,1,"Scenario B"  
362,1,1,3,1,1,1,2,2,2,3,3,2,4,1,"Scenario B"  
359,2,1,2,3,1,3,1,1,2,1,1,1,2,2,"Scenario A"  
359,1,1,2,1,2,2,3,2,2,3,2,4,1,2,"Scenario B"  
359,2,1,3,2,3,5,5,1,2,1,3,4,4,4,"Scenario B"  
359,1,2,3,3,1,4,3,2,1,1,1,2,1,4,"Scenario A"  
359,1,1,2,1,4,5,5,2,2,1,2,3,4,1,"Scenario B"  
359,2,1,2,3,1,1,3,1,2,2,1,2,3,1,"Scenario B"  
359,1,2,1,2,1,3,4,2,1,3,3,3,5,1,"Scenario B"  
359,2,2,3,2,1,1,5,1,1,2,3,4,2,2,"Scenario B"  
359,2,2,3,1,2,4,2,1,1,1,2,2,2,5,"Scenario A"  
359,2,2,1,1,3,3,4,1,1,2,3,1,3,5,"Scenario A"  
143,1,1,3,3,3,1,2,1,2,2,3,2,2,5,"Scenario A"  
143,1,2,3,2,1,1,4,2,1,2,3,4,5,3,"Scenario A"  
143,2,2,1,2,3,4,2,1,1,3,1,1,4,5,"Scenario A"  
143,1,2,1,1,3,2,1,2,1,1,2,4,3,1,"Scenario A"  
143,1,2,2,2,2,3,2,2,2,3,1,4,5,1,"Scenario A"  
143,2,1,2,1,2,1,4,1,1,1,3,2,5,2,"Scenario B"  
143,2,1,1,3,1,2,1,1,2,3,2,4,3,4,"Scenario B"  
143,1,1,3,3,1,5,2,2,2,2,1,3,1,3,"Scenario B"  
143,1,1,2,2,3,3,3,2,2,3,1,2,4,5,"Scenario A"  
143,1,2,2,3,1,5,4,2,1,3,2,4,2,5,"Scenario A"  
144,2,1,2,2,3,2,1,1,2,3,2,1,5,4,"Scenario A"  
144,1,2,2,3,2,1,5,2,1,1,1,4,3,3,"Scenario A"  
144,2,2,1,1,2,4,5,1,2,2,2,3,1,1,"Scenario A"  
144,1,1,3,3,1,4,1,2,2,1,2,4,3,2,"Scenario A"  
144,2,1,2,1,4,2,3,1,1,3,3,1,5,3,"Scenario A"  
144,2,2,3,1,1,1,1,1,1,1,3,3,3,4,"Scenario A"  
144,1,2,1,2,3,2,4,2,1,2,2,2,5,3,"Scenario A"  
144,2,2,3,3,4,3,5,2,1,2,1,3,5,2,"Scenario A"  
144,1,2,1,1,2,4,5,2,1,3,3,4,2,4,"Scenario B"  
144,1,1,2,2,2,1,1,2,2,3,1,1,1,2,"Scenario B"  
150,1,2,2,2,4,3,2,1,1,1,3,3,4,3,"Scenario B"  
150,2,1,3,1,2,5,4,1,2,1,3,4,2,1,"Scenario A"  
150,1,1,1,3,1,4,5,2,2,2,2,2,3,5,"Scenario A"  
150,2,1,2,2,1,4,1,1,2,2,1,3,1,2,"Scenario A"  
150,1,1,3,2,2,2,3,2,2,3,3,1,2,4,"Scenario B"  
150,2,1,1,1,4,1,2,1,2,3,2,2,5,3,"Scenario A"  
150,2,1,1,2,1,4,4,1,2,3,1,3,3,5,"Scenario B"  
150,2,2,2,3,3,5,4,1,2,2,3,4,4,1,"Scenario A"  
150,1,1,2,1,4,3,5,2,1,1,2,3,5,1,"Scenario B"  
150,1,1,3,1,1,1,2,2,2,3,3,2,4,1,"Scenario B"  
142,2,1,2,3,1,3,1,1,2,1,1,1,2,2,"Scenario A"  
142,1,1,2,1,2,2,3,2,2,3,2,4,1,2,"Scenario B"  
142,2,1,3,2,3,5,5,1,2,1,3,4,4,4,"Scenario B"  
142,1,2,3,3,1,4,3,2,1,1,1,2,1,4,"Scenario A"

142,1,1,2,1,4,5,5,2,2,1,2,3,4,1,"Scenario B"  
142,2,1,2,3,1,1,3,1,2,2,1,2,3,1,"Scenario A"  
142,1,2,1,2,1,3,4,2,1,3,3,3,5,1,"Scenario B"  
142,2,2,3,2,1,1,5,1,1,2,3,4,2,2,"Scenario B"  
142,2,2,3,1,2,4,2,1,1,1,2,2,2,5,"Scenario B"  
142,2,2,1,1,3,3,4,1,1,2,3,1,3,5,"Scenario B"  
145,1,1,3,3,3,1,2,1,2,2,3,2,2,5,"Scenario B"  
145,1,2,3,2,1,1,4,2,1,2,3,4,5,3,"Scenario B"  
145,2,2,1,2,3,4,2,1,1,3,1,1,4,5,"Scenario A"  
145,1,2,1,1,3,2,1,2,1,1,2,4,3,1,"Scenario A"  
145,1,2,2,2,2,3,2,2,2,3,1,4,5,1,"Scenario B"  
145,2,1,2,1,2,1,4,1,1,1,1,3,2,5,2,"Scenario B"  
145,2,1,1,3,1,2,1,1,2,3,2,4,3,4,"Scenario A"  
145,1,1,3,3,1,5,2,2,2,2,1,3,1,3,"Scenario B"  
145,1,1,2,2,3,3,3,2,2,3,1,2,4,5,"Scenario A"  
145,1,2,2,3,1,5,4,2,1,3,2,4,2,5,"Scenario A"  
149,2,1,2,2,3,2,1,1,2,3,2,1,5,4,"Scenario B"  
149,1,2,2,3,2,1,5,2,1,1,1,4,3,3,"Scenario A"  
149,2,2,1,1,2,4,5,1,2,2,2,3,1,1,"Scenario B"  
149,1,1,3,3,1,4,1,2,2,1,2,4,3,2,"Scenario B"  
149,2,1,2,1,4,2,3,1,1,3,3,1,5,3,"Scenario B"  
149,2,2,3,1,1,1,1,1,1,1,3,3,3,4,"Scenario A"  
149,1,2,1,2,3,2,4,2,1,2,2,2,5,3,"Scenario A"  
149,2,2,3,3,4,3,5,2,1,2,1,3,5,2,"Scenario B"  
149,1,2,1,1,2,4,5,2,1,3,3,4,2,4,"Scenario B"  
149,1,1,2,2,2,1,1,2,2,3,1,1,1,2,"Scenario A"  
209,1,2,2,2,4,3,2,1,1,1,3,3,4,3,"Scenario A"  
209,2,1,3,1,2,5,4,1,2,1,3,4,2,1,"Scenario B"  
209,1,1,1,3,1,4,5,2,2,2,2,2,3,5,"Scenario A"  
209,2,1,2,2,1,4,1,1,2,2,1,3,1,2,"Scenario A"  
209,1,1,3,2,2,2,3,2,2,3,3,1,2,4,"Scenario B"  
209,2,1,1,1,4,1,2,1,2,3,2,2,5,3,"Scenario B"  
209,2,1,1,2,1,4,4,1,2,3,1,3,3,5,"Scenario A"  
209,2,2,2,3,3,5,4,1,2,2,3,4,4,1,"Scenario B"  
209,1,1,2,1,4,3,5,2,1,1,2,3,5,1,"Scenario B"  
209,1,1,3,1,1,1,2,2,2,3,3,2,4,1,"Scenario B"  
213,2,1,2,3,1,3,1,1,2,1,1,1,2,2,"Scenario A"  
213,1,1,2,1,2,2,3,2,2,3,2,4,1,2,"Scenario A"  
213,2,1,3,2,3,5,5,1,2,1,3,4,4,4,"Scenario A"  
213,1,2,3,3,1,4,3,2,1,1,1,2,1,4,"Scenario A"  
213,1,1,2,1,4,5,5,2,2,1,2,3,4,1,"Scenario B"  
213,2,1,2,3,1,1,3,1,2,2,1,2,3,1,"Scenario B"  
213,1,2,1,2,1,3,4,2,1,3,3,3,5,1,"Scenario B"  
213,2,2,3,2,1,1,5,1,1,2,3,4,2,2,"Scenario B"  
213,2,2,3,1,2,4,2,1,1,1,2,2,2,5,"Scenario A"  
213,2,2,1,1,3,3,4,1,1,2,3,1,3,5,"Scenario A"  
210,1,1,3,3,3,1,2,1,2,2,3,2,2,5,"Scenario A"  
210,1,2,3,2,1,1,4,2,1,2,3,4,5,3,"Scenario A"  
210,2,2,1,2,3,4,2,1,1,3,1,1,4,5,"Scenario A"  
210,1,2,1,1,3,2,1,2,1,1,2,4,3,1,"Scenario A"  
210,1,2,2,2,2,3,2,2,2,3,1,4,5,1,"Scenario B"  
210,2,1,2,1,2,1,4,1,1,1,3,2,5,2,"Scenario A"  
210,2,1,1,3,1,2,1,1,2,3,2,4,3,4,"Scenario A"  
210,1,1,3,3,1,5,2,2,2,2,1,3,1,3,"Scenario B"  
210,1,1,2,2,3,3,3,2,2,3,1,2,4,5,"Scenario A"  
210,1,2,2,3,1,5,4,2,1,3,2,4,2,5,"Scenario B"  
204,2,1,2,2,3,2,1,1,2,3,2,1,5,4,"Scenario A"

204,1,2,2,3,2,1,5,2,1,1,1,4,3,3,"Scenario B"  
204,2,2,1,1,2,4,5,1,2,2,2,3,1,1,"Scenario A"  
204,1,1,3,3,1,4,1,2,2,1,2,4,3,2,"Scenario A"  
204,2,1,2,1,4,2,3,1,1,3,3,1,5,3,"Scenario A"  
204,2,2,3,1,1,1,1,1,1,1,3,3,3,4,"Scenario B"  
204,1,2,1,2,3,2,4,2,1,2,2,2,5,3,"Scenario A"  
204,2,2,3,3,4,3,5,2,1,2,1,3,5,2,"Scenario A"  
204,1,2,1,1,2,4,5,2,1,3,3,4,2,4,"Scenario A"  
204,1,1,2,2,2,1,1,2,2,3,1,1,1,2,"Scenario A"  
203,1,2,2,2,4,3,2,1,1,1,3,3,4,3,"Scenario A"  
203,2,1,3,1,2,5,4,1,2,1,3,4,2,1,"Scenario B"  
203,1,1,1,3,1,4,5,2,2,2,2,2,3,5,"Scenario B"  
203,2,1,2,2,1,4,1,1,2,2,1,3,1,2,"Scenario A"  
203,1,1,3,2,2,2,3,2,2,3,3,1,2,4,"Scenario A"  
203,2,1,1,1,4,1,2,1,2,3,2,2,5,3,"Scenario A"  
203,2,1,1,2,1,4,4,1,2,3,1,3,3,5,"Scenario A"  
203,2,2,2,3,3,5,4,1,2,2,3,4,4,1,"Scenario B"  
203,1,1,2,1,4,3,5,2,1,1,2,3,5,1,"Scenario B"  
203,1,1,3,1,1,1,2,2,2,3,3,2,4,1,"Scenario B"  
20,2,1,2,3,1,3,1,1,2,1,1,1,2,2,"Scenario A"  
20,1,1,2,1,2,2,3,2,2,3,2,4,1,2,"Scenario B"  
20,2,1,3,2,3,5,5,1,2,1,3,4,4,4,"Scenario B"  
20,1,2,3,3,1,4,3,2,1,1,1,2,1,4,"Scenario A"  
20,1,1,2,1,4,5,5,2,2,1,2,3,4,1,"Scenario B"  
20,2,1,2,3,1,1,3,1,2,2,1,2,3,1,"Scenario B"  
20,1,2,1,2,1,3,4,2,1,3,3,3,5,1,"Scenario B"  
20,2,2,3,2,1,1,5,1,1,2,3,4,2,2,"Scenario B"  
20,2,2,3,1,2,4,2,1,1,1,2,2,2,5,"Scenario A"  
20,2,2,1,1,3,3,4,1,1,2,3,1,3,5,"Scenario A"  
175,1,1,3,3,3,1,2,1,2,2,3,2,2,5,"Scenario A"  
175,1,2,3,2,1,1,4,2,1,2,3,4,5,3,"Scenario B"  
175,2,2,1,2,3,4,2,1,1,3,1,1,4,5,"Scenario A"  
175,1,2,1,1,3,2,1,2,1,1,2,4,3,1,"Scenario B"  
175,1,2,2,2,2,3,2,2,2,3,1,4,5,1,"Scenario B"  
175,2,1,2,1,2,1,4,1,1,1,3,2,5,2,"Scenario B"  
175,2,1,1,3,1,2,1,1,2,3,2,4,3,4,"Scenario A"  
175,1,1,3,3,1,5,2,2,2,2,1,3,1,3,"Scenario A"  
175,1,1,2,2,3,3,3,2,2,3,1,2,4,5,"Scenario A"  
175,1,2,2,3,1,5,4,2,1,3,2,4,2,5,"Scenario A"  
17,2,1,2,2,3,2,1,1,2,3,2,1,5,4,"Scenario A"  
17,1,2,2,3,2,1,5,2,1,1,1,4,3,3,"Scenario B"  
17,2,2,1,1,2,4,5,1,2,2,2,3,1,1,"Scenario B"  
17,1,1,3,3,1,4,1,2,2,1,2,4,3,2,"Scenario A"  
17,2,1,2,1,4,2,3,1,1,3,3,1,5,3,"Scenario A"  
17,2,2,3,1,1,1,1,1,1,1,3,3,3,4,"Scenario A"  
17,1,2,1,2,3,2,4,2,1,2,2,2,5,3,"Scenario A"  
17,2,2,3,3,4,3,5,2,1,2,1,3,5,2,"Scenario B"  
17,1,2,1,1,2,4,5,2,1,3,3,4,2,4,"Scenario B"  
17,1,1,2,2,2,1,1,2,2,3,1,1,1,2,"Scenario A"  
16,1,2,2,2,4,3,2,1,1,1,3,3,4,3,"Scenario A"  
16,2,1,3,1,2,5,4,1,2,1,3,4,2,1,"Scenario B"  
16,1,1,1,3,1,4,5,2,2,2,2,2,3,5,"Scenario B"  
16,2,1,2,2,1,4,1,1,2,2,1,3,1,2,"Scenario A"  
16,1,1,3,2,2,2,3,2,2,3,3,1,2,4,"Scenario A"  
16,2,1,1,1,4,1,2,1,2,3,2,2,5,3,"Scenario A"  
16,2,1,1,2,1,4,4,1,2,3,1,3,3,5,"Scenario A"  
16,2,2,2,3,3,5,4,1,2,2,3,4,4,1,"Scenario B"

16,1,1,2,1,4,3,5,2,1,1,2,3,5,1,"Scenario B"  
16,1,1,3,1,1,1,2,2,2,3,3,2,4,1,"Scenario B"  
14,2,1,2,3,1,3,1,1,2,1,1,1,2,2,"Scenario A"  
14,1,1,2,1,2,2,3,2,2,3,2,4,1,2,"Scenario B"  
14,2,1,3,2,3,5,5,1,2,1,3,4,4,4,"Scenario B"  
14,1,2,3,3,1,4,3,2,1,1,1,2,1,4,"Scenario A"  
14,1,1,2,1,4,5,5,2,2,1,2,3,4,1,"Scenario B"  
14,2,1,2,3,1,1,3,1,2,2,1,2,3,1,"Scenario B"  
14,1,2,1,2,1,3,4,2,1,3,3,3,5,1,"Scenario B"  
14,2,2,3,2,1,1,5,1,1,2,3,4,2,2,"Scenario B"  
14,2,2,3,1,2,4,2,1,1,1,2,2,2,5,"Scenario A"  
14,2,2,1,1,3,3,4,1,1,2,3,1,3,5,"Scenario A"  
18,1,1,3,3,3,1,2,1,2,2,3,2,2,5,"Scenario B"  
18,1,2,3,2,1,1,4,2,1,2,3,4,5,3,"Scenario A"  
18,2,2,1,2,3,4,2,1,1,3,1,1,4,5,"Scenario B"  
18,1,2,1,1,3,2,1,2,1,1,2,4,3,1,"Scenario B"  
18,1,2,2,2,2,3,2,2,2,3,1,4,5,1,"Scenario A"  
18,2,1,2,1,2,1,4,1,1,1,3,2,5,2,"Scenario A"  
18,2,1,1,3,1,2,1,1,2,3,2,4,3,4,"Scenario B"  
18,1,1,3,3,1,5,2,2,2,2,1,3,1,3,"Scenario B"  
18,1,1,2,2,3,3,3,2,2,3,1,2,4,5,"Scenario B"  
18,1,2,2,3,1,5,4,2,1,3,2,4,2,5,"Scenario B"  
15,2,1,2,2,3,2,1,1,2,3,2,1,5,4,"Scenario A"  
15,1,2,2,3,2,1,5,2,1,1,1,4,3,3,"Scenario B"  
15,2,2,1,1,2,4,5,1,2,2,2,3,1,1,"Scenario B"  
15,1,1,3,3,1,4,1,2,2,1,2,4,3,2,"Scenario A"  
15,2,1,2,1,4,2,3,1,1,3,3,1,5,3,"Scenario A"  
15,2,2,3,1,1,1,1,1,1,1,3,3,3,4,"Scenario A"  
15,1,2,1,2,3,2,4,2,1,2,2,2,5,3,"Scenario B"  
15,2,2,3,3,4,3,5,2,1,2,1,3,5,2,"Scenario B"  
15,1,2,1,1,2,4,5,2,1,3,3,4,2,4,"Scenario B"  
15,1,1,2,2,2,1,1,2,2,3,1,1,1,2,"Scenario A"  
176,1,2,2,2,4,3,2,1,1,1,3,3,4,3,"Scenario A"  
176,2,1,3,1,2,5,4,1,2,1,3,4,2,1,"Scenario B"  
176,1,1,1,3,1,4,5,2,2,2,2,2,3,5,"Scenario B"  
176,2,1,2,2,1,4,1,1,2,2,1,3,1,2,"Scenario A"  
176,1,1,3,2,2,2,3,2,2,3,3,1,2,4,"Scenario A"  
176,2,1,1,1,4,1,2,1,2,3,2,2,5,3,"Scenario A"  
176,2,1,1,2,1,4,4,1,2,3,1,3,3,5,"Scenario A"  
176,2,2,2,3,3,5,4,1,2,2,3,4,4,1,"Scenario B"  
176,1,1,2,1,4,3,5,2,1,1,2,3,5,1,"Scenario B"  
176,1,1,3,1,1,1,2,2,2,3,3,2,4,1,"Scenario B"  
172,2,1,2,3,1,3,1,1,2,1,1,1,2,2,"Scenario A"  
172,1,1,2,1,2,2,3,2,2,3,2,4,1,2,"Scenario B"  
172,2,1,3,2,3,5,5,1,2,1,3,4,4,4,"Scenario B"  
172,1,2,3,3,1,4,3,2,1,1,1,2,1,4,"Scenario A"  
172,1,1,2,1,4,5,5,2,2,1,2,3,4,1,"Scenario B"  
172,2,1,2,1,2,1,3,1,3,1,2,2,1,2,3,1,"Scenario B"  
172,1,2,1,2,1,3,4,2,1,3,3,3,5,1,"Scenario B"  
172,2,2,3,2,1,1,5,1,1,2,3,4,2,2,"Scenario B"  
172,2,2,3,1,2,4,2,1,1,1,2,2,2,5,"Scenario A"  
172,2,2,1,1,3,3,4,1,1,2,3,1,3,5,"Scenario A"  
173,1,1,3,3,3,1,2,1,2,2,3,2,2,5,"Scenario A"  
173,1,2,3,2,1,1,4,2,1,2,3,4,5,3,"Scenario B"  
173,2,2,1,2,3,4,2,1,1,3,1,1,4,5,"Scenario A"  
173,1,2,1,1,3,2,1,2,1,1,2,4,3,1,"Scenario A"  
173,1,2,2,2,2,3,2,2,2,3,1,4,5,1,"Scenario B"

173,2,1,2,1,2,1,4,1,1,1,3,2,5,2,"Scenario B"  
173,2,1,1,3,1,2,1,1,2,3,2,4,3,4,"Scenario A"  
173,1,1,3,3,1,5,2,2,2,2,1,3,1,3,"Scenario A"  
173,1,1,2,2,3,3,3,2,2,3,1,2,4,5,"Scenario A"  
173,1,2,2,3,1,5,4,2,1,3,2,4,2,5,"Scenario A"  
171,2,1,2,2,3,2,1,1,2,3,2,1,5,4,"Scenario A"  
171,1,2,2,3,2,1,5,2,1,1,1,4,3,3,"Scenario B"  
171,2,2,1,1,2,4,5,1,2,2,2,3,1,1,"Scenario B"  
171,1,1,3,3,1,4,1,2,2,1,2,4,3,2,"Scenario A"  
171,2,1,2,1,4,2,3,1,1,3,3,1,5,3,"Scenario A"  
171,2,2,3,1,1,1,1,1,1,1,3,3,3,4,"Scenario A"  
171,1,2,1,2,3,2,4,2,1,2,2,2,5,3,"Scenario B"  
171,2,2,3,3,4,3,5,2,1,2,1,3,5,2,"Scenario B"  
171,1,2,1,1,2,4,5,2,1,3,3,4,2,4,"Scenario B"  
171,1,1,2,2,2,1,1,2,2,3,1,1,1,2,"Scenario A"  
174,1,2,2,2,4,3,2,1,1,1,3,3,4,3,"Scenario A"  
174,2,1,3,1,2,5,4,1,2,1,3,4,2,1,"Scenario B"  
174,1,1,1,3,1,4,5,2,2,2,2,2,3,5,"Scenario B"  
174,2,1,2,2,1,4,1,1,2,2,1,3,1,2,"Scenario A"  
174,1,1,3,2,2,2,3,2,2,3,3,1,2,4,"Scenario A"  
174,2,1,1,1,4,1,2,1,2,3,2,2,5,3,"Scenario A"  
174,2,1,1,2,1,4,4,1,2,3,1,3,3,5,"Scenario A"  
174,2,2,2,3,3,5,4,1,2,2,3,4,4,1,"Scenario B"  
174,1,1,2,1,4,3,5,2,1,1,2,3,5,1,"Scenario B"  
174,1,1,3,1,1,1,2,2,2,3,3,2,4,1,"Scenario B"  
19,2,1,2,3,1,3,1,1,2,1,1,1,2,2,"Scenario A"  
19,1,1,2,1,2,2,3,2,2,3,2,4,1,2,"Scenario B"  
19,2,1,3,2,3,5,5,1,2,1,3,4,4,4,"Scenario B"  
19,1,2,3,3,1,4,3,2,1,1,1,2,1,4,"Scenario A"  
19,1,1,2,1,4,5,5,2,2,1,2,3,4,1,"Scenario B"  
19,2,1,2,3,1,1,3,1,2,2,1,2,3,1,"Scenario B"  
19,1,2,1,2,1,3,4,2,1,3,3,3,5,1,"Scenario B"  
19,2,2,3,2,1,1,5,1,1,2,3,4,2,2,"Scenario B"  
19,2,2,3,1,2,4,2,1,1,1,2,2,2,5,"Scenario A"  
19,2,2,1,1,3,3,4,1,1,2,3,1,3,5,"Scenario A"  
170,1,1,3,3,3,1,2,1,2,2,3,2,2,5,"Scenario A"  
170,1,2,3,2,1,1,4,2,1,2,3,4,5,3,"Scenario B"  
170,2,2,1,2,3,4,2,1,1,3,1,1,4,5,"Scenario A"  
170,1,2,1,1,3,2,1,2,1,1,2,4,3,1,"Scenario A"  
170,1,2,2,2,2,3,2,2,2,3,1,4,5,1,"Scenario B"  
170,2,1,2,1,2,1,4,1,1,1,3,2,5,2,"Scenario B"  
170,2,1,1,3,1,2,1,1,2,3,2,4,3,4,"Scenario A"  
170,1,1,3,3,1,5,2,2,2,2,1,3,1,3,"Scenario A"  
170,1,1,2,2,3,3,3,2,2,3,1,2,4,5,"Scenario A"  
170,1,2,2,3,1,5,4,2,1,3,2,4,2,5,"Scenario A"  
178,2,1,2,2,3,2,1,1,2,3,2,1,5,4,"Scenario B"  
178,1,2,2,3,2,1,5,2,1,1,1,4,3,3,"Scenario B"  
178,2,2,1,1,2,4,5,1,2,2,2,3,1,1,"Scenario B"  
178,1,1,3,3,1,4,1,2,2,1,2,4,3,2,"Scenario B"  
178,2,1,2,1,4,2,3,1,1,3,3,1,5,3,"Scenario B"  
178,2,2,3,1,1,1,1,1,1,1,3,3,3,4,"Scenario A"  
178,1,2,1,2,3,2,4,2,1,2,2,2,5,3,"Scenario A"  
178,2,2,3,3,4,3,5,2,1,2,1,3,5,2,"Scenario A"  
178,1,2,1,1,2,4,5,2,1,3,3,4,2,4,"Scenario A"  
178,1,1,2,2,2,1,1,2,2,3,1,1,1,2,"Scenario B"  
468,1,2,2,2,4,3,2,1,1,1,3,3,4,3,"Scenario B"  
468,2,1,3,1,2,5,4,1,2,1,3,4,2,1,"Scenario A"

468,1,1,1,3,1,4,5,2,2,2,2,2,3,5,"Scenario A"  
468,2,1,2,2,1,4,1,1,2,2,1,3,1,2,"Scenario A"  
468,1,1,3,2,2,2,3,2,2,3,3,1,2,4,"Scenario A"  
468,2,1,1,1,4,1,2,1,2,3,2,2,5,3,"Scenario B"  
468,2,1,1,2,1,4,4,1,2,3,1,3,3,5,"Scenario A"  
468,2,2,2,3,3,5,4,1,2,2,3,4,4,1,"Scenario B"  
468,1,1,2,1,4,3,5,2,1,1,2,3,5,1,"Scenario B"  
468,1,1,3,1,1,1,2,2,2,3,3,2,4,1,"Scenario B"  
251,2,1,2,3,1,3,1,1,2,1,1,1,2,2,"Scenario A"  
251,1,1,2,1,2,2,3,2,2,3,2,4,1,2,"Scenario B"  
251,2,1,3,2,3,5,5,1,2,1,3,4,4,4,"Scenario A"  
251,1,2,3,3,1,4,3,2,1,1,1,2,1,4,"Scenario A"  
251,1,1,2,1,4,5,5,2,2,1,2,3,4,1,"Scenario A"  
251,2,1,2,3,1,1,3,1,2,2,1,2,3,1,"Scenario A"  
251,1,2,1,2,1,3,4,2,1,3,3,3,5,1,"Scenario B"  
251,2,2,3,2,1,1,5,1,1,2,3,4,2,2,"Scenario A"  
251,2,2,3,1,2,4,2,1,1,1,2,2,2,5,"Scenario A"  
251,2,2,1,1,3,3,4,1,1,2,3,1,3,5,"Scenario B"  
258,1,1,3,3,3,1,2,1,2,2,3,2,2,5,"Scenario B"  
258,1,2,3,2,1,1,4,2,1,2,3,4,5,3,"Scenario A"  
258,2,2,1,2,3,4,2,1,1,3,1,1,4,5,"Scenario A"  
258,1,2,1,1,3,2,1,2,1,1,2,4,3,1,"Scenario B"  
258,1,2,2,2,2,3,2,2,2,3,1,4,5,1,"Scenario A"  
258,2,1,2,1,2,1,4,1,1,1,3,2,5,2,"Scenario B"  
258,2,1,1,3,1,2,1,1,2,3,2,4,3,4,"Scenario A"  
258,1,1,3,3,1,5,2,2,2,2,1,3,1,3,"Scenario A"  
258,1,1,2,2,3,3,3,2,2,3,1,2,4,5,"Scenario A"  
258,1,2,2,3,1,5,4,2,1,3,2,4,2,5,"Scenario A"  
246,2,1,2,2,3,2,1,1,2,3,2,1,5,4,"Scenario A"  
246,1,2,2,3,2,1,5,2,1,1,1,4,3,3,"Scenario A"  
246,2,2,1,1,2,2,4,5,1,2,2,2,3,1,1,"Scenario B"  
246,1,1,3,3,1,4,1,2,2,1,2,4,3,2,"Scenario A"  
246,2,1,2,1,4,2,3,1,1,3,3,1,5,3,"Scenario B"  
246,2,2,3,1,1,1,1,1,1,1,3,3,3,4,"Scenario A"  
246,1,2,1,2,3,2,4,2,1,2,2,2,5,3,"Scenario B"  
246,2,2,3,3,4,3,5,2,1,2,1,3,5,2,"Scenario A"  
246,1,2,1,1,2,4,5,2,1,3,3,4,2,4,"Scenario B"  
246,1,1,2,2,2,1,1,2,2,3,1,1,1,2,"Scenario A"  
475,1,2,2,2,4,3,2,1,1,1,3,3,4,3,"Scenario B"  
475,2,1,3,1,2,5,4,1,2,1,3,4,2,1,"Scenario A"  
475,1,1,1,3,1,4,5,2,2,2,2,2,3,5,"Scenario B"  
475,2,1,2,2,1,4,1,1,2,2,1,3,1,2,"Scenario A"  
475,1,1,3,2,2,2,3,2,2,3,3,1,2,4,"Scenario B"  
475,2,1,1,1,4,1,2,1,2,3,2,2,5,3,"Scenario A"  
475,2,1,1,2,1,4,4,1,2,3,1,3,3,5,"Scenario B"  
475,2,2,2,3,3,5,4,1,2,2,3,4,4,1,"Scenario B"  
475,1,1,2,1,4,3,5,2,1,1,2,3,5,1,"Scenario A"  
475,1,1,3,1,1,1,1,2,2,2,3,3,2,4,1,"Scenario B"  
439,2,1,2,3,1,3,1,1,2,1,1,1,2,2,"Scenario B"  
439,1,1,2,1,2,2,3,2,2,3,2,4,1,2,"Scenario A"  
439,2,1,3,2,3,5,5,1,2,1,3,4,4,4,"Scenario B"  
439,1,2,3,3,1,4,3,2,1,1,1,2,1,4,"Scenario B"  
439,1,1,2,1,4,5,5,2,2,1,2,3,4,1,"Scenario A"  
439,2,1,2,3,1,1,3,1,2,2,1,2,3,1,"Scenario A"  
439,1,2,1,2,1,3,4,2,1,3,3,3,5,1,"Scenario A"  
439,2,2,3,2,1,1,5,1,1,2,3,4,2,2,"Scenario A"  
439,2,2,3,1,2,4,2,1,1,1,2,2,2,5,"Scenario A"



439,2,2,1,1,3,3,4,1,1,2,3,1,3,5,"Scenario A"  
247,1,1,3,3,3,1,2,1,2,2,3,2,2,5,"Scenario A"  
247,1,2,3,2,1,1,4,2,1,2,3,4,5,3,"Scenario A"  
247,2,2,1,2,3,4,2,1,1,3,1,1,4,5,"Scenario B"  
247,1,2,1,1,3,2,1,2,1,1,2,4,3,1,"Scenario A"  
247,1,2,2,2,2,3,2,2,2,3,1,4,5,1,"Scenario B"  
247,2,1,2,1,2,1,4,1,1,1,3,2,5,2,"Scenario A"  
247,2,1,1,3,1,2,1,1,2,3,2,4,3,4,"Scenario B"  
247,1,1,3,3,1,5,2,2,2,2,1,3,1,3,"Scenario A"  
247,1,1,2,2,3,3,3,2,2,3,1,2,4,5,"Scenario B"  
247,1,2,2,3,1,5,4,2,1,3,2,4,2,5,"Scenario B"  
248,2,1,2,2,3,2,1,1,2,3,2,1,5,4,"Scenario A"  
248,1,2,2,3,2,1,5,2,1,1,1,4,3,3,"Scenario B"  
248,2,2,1,1,2,4,5,1,2,2,2,3,1,1,"Scenario A"  
248,1,1,3,3,1,4,1,2,2,1,2,4,3,2,"Scenario A"  
248,2,1,2,1,4,2,3,1,1,3,3,1,5,3,"Scenario B"  
248,2,2,3,1,1,1,1,1,1,1,3,3,3,4,"Scenario A"  
248,1,2,1,2,3,2,4,2,1,2,2,2,5,3,"Scenario B"  
248,2,2,3,3,4,3,5,2,1,2,1,3,5,2,"Scenario B"  
248,1,2,1,1,2,4,5,2,1,3,3,4,2,4,"Scenario B"  
248,1,1,2,2,2,1,1,2,2,3,1,1,1,2,"Scenario B"  
255,1,2,2,2,4,3,2,1,1,1,3,3,4,3,"Scenario B"  
255,2,1,3,1,2,5,4,1,2,1,3,4,2,1,"Scenario B"  
255,1,1,1,3,1,4,5,2,2,2,2,2,3,5,"Scenario B"  
255,2,1,2,2,1,4,1,1,2,2,1,3,1,2,"Scenario A"  
255,1,1,3,2,2,2,3,2,2,3,3,1,2,4,"Scenario B"  
255,2,1,1,1,4,1,2,1,2,3,2,2,5,3,"Scenario B"  
255,2,1,1,2,1,4,4,1,2,3,1,3,3,5,"Scenario B"  
255,2,2,2,3,3,5,4,1,2,2,3,4,4,1,"Scenario B"  
255,1,1,2,1,4,3,5,2,1,1,2,3,5,1,"Scenario B"  
255,1,1,3,1,1,1,2,2,2,3,3,2,4,1,"Scenario B"  
254,2,1,2,3,1,3,1,1,2,1,1,1,2,2,"Scenario A"  
254,1,1,2,1,2,2,3,2,2,3,2,4,1,2,"Scenario B"  
254,2,1,3,2,3,5,5,1,2,1,3,4,4,4,"Scenario A"  
254,1,2,3,3,1,4,3,2,1,1,1,2,1,4,"Scenario A"  
254,1,1,2,1,4,5,5,2,2,1,2,3,4,1,"Scenario B"  
254,2,1,2,3,1,1,3,1,2,2,1,2,3,1,"Scenario B"  
254,1,2,1,2,1,3,4,2,1,3,3,3,5,1,"Scenario B"  
254,2,2,3,2,1,1,5,1,1,2,3,4,2,2,"Scenario B"  
254,2,2,3,1,2,4,2,1,1,1,2,2,2,5,"Scenario A"  
254,2,2,1,1,3,3,4,1,1,2,3,1,3,5,"Scenario A"  
465,1,1,3,3,3,1,2,1,2,2,3,2,2,5,"Scenario B"  
465,1,2,3,2,1,1,4,2,1,2,3,4,5,3,"Scenario A"  
465,2,2,1,2,3,4,2,1,1,3,1,1,4,5,"Scenario A"  
465,1,2,1,1,3,2,1,2,1,1,2,4,3,1,"Scenario B"  
465,1,2,2,2,3,2,2,2,3,1,4,5,1,"Scenario A"  
465,2,1,2,1,2,1,4,1,1,1,3,2,5,2,"Scenario A"  
465,2,1,1,3,1,2,1,1,2,3,2,4,3,4,"Scenario B"  
465,1,1,3,3,1,5,2,2,2,2,1,3,1,3,"Scenario A"  
465,1,1,2,2,3,3,3,2,2,3,1,2,4,5,"Scenario B"  
465,1,2,2,3,1,5,4,2,1,3,2,4,2,5,"Scenario A"  
471,2,1,2,2,3,2,1,1,2,3,2,1,5,4,"Scenario B"  
471,1,2,2,3,2,1,5,2,1,1,1,4,3,3,"Scenario B"  
471,2,2,1,1,2,4,5,1,2,2,2,3,1,1,"Scenario B"  
471,1,1,3,3,1,4,1,2,2,1,2,4,3,2,"Scenario A"  
471,2,1,2,1,4,2,3,1,1,3,3,1,5,3,"Scenario B"  
471,2,2,3,1,1,1,1,1,1,1,3,3,3,4,"Scenario A"

471,1,2,1,2,3,2,4,2,1,2,2,2,5,3,"Scenario B"  
471,2,2,3,3,4,3,5,2,1,2,1,3,5,2,"Scenario B"  
471,1,2,1,1,2,4,5,2,1,3,3,4,2,4,"Scenario B"  
471,1,1,2,2,2,1,1,2,2,3,1,1,1,2,"Scenario A"  
252,1,2,2,2,4,3,2,1,1,1,3,3,4,3,"Scenario B"  
252,2,1,3,1,2,5,4,1,2,1,3,4,2,1,"Scenario A"  
252,1,1,1,3,1,4,5,2,2,2,2,2,3,5,"Scenario A"  
252,2,1,2,2,1,4,1,1,2,2,1,3,1,2,"Scenario A"  
252,1,1,3,2,2,2,3,2,2,3,3,1,2,4,"Scenario B"  
252,2,1,1,1,4,1,2,1,2,3,2,2,5,3,"Scenario B"  
252,2,1,1,2,1,4,4,1,2,3,1,3,3,5,"Scenario A"  
252,2,2,2,3,3,5,4,1,2,2,3,4,4,1,"Scenario A"  
252,1,1,2,1,4,3,5,2,1,1,2,3,5,1,"Scenario B"  
252,1,1,3,1,1,1,2,2,2,3,3,2,4,1,"Scenario A"  
470,2,1,2,3,1,3,1,1,2,1,1,1,2,2,"Scenario A"  
470,1,1,2,1,2,2,3,2,2,3,2,4,1,2,"Scenario A"  
470,2,1,3,2,3,5,5,1,2,1,3,4,4,4,"Scenario A"  
470,1,2,3,3,1,4,3,2,1,1,1,2,1,4,"Scenario A"  
470,1,1,2,1,4,5,5,2,2,1,2,3,4,1,"Scenario A"  
470,2,1,2,3,1,1,3,1,2,2,1,2,3,1,"Scenario A"  
470,1,2,1,2,1,3,4,2,1,3,3,3,5,1,"Scenario B"  
470,2,2,3,2,1,1,5,1,1,2,3,4,2,2,"Scenario A"  
470,2,2,3,1,2,4,2,1,1,1,2,2,2,5,"Scenario A"  
470,2,2,1,1,3,3,4,1,1,2,3,1,3,5,"Scenario A"  
474,1,1,3,3,3,1,2,1,2,2,3,2,2,5,"Scenario A"  
474,1,2,3,2,1,1,4,2,1,2,3,4,5,3,"Scenario B"  
474,2,2,1,2,3,4,2,1,1,3,1,1,4,5,"Scenario B"  
474,1,2,1,1,3,2,1,2,1,1,2,4,3,1,"Scenario A"  
474,1,2,2,2,2,3,2,2,2,3,1,4,5,1,"Scenario B"  
474,2,1,2,1,2,1,4,1,1,1,1,3,2,5,2,"Scenario B"  
474,2,1,1,3,1,2,1,1,2,3,2,4,3,4,"Scenario A"  
474,1,1,3,3,1,5,2,2,2,2,1,3,1,3,"Scenario A"  
474,1,1,2,2,3,3,3,2,2,3,1,2,4,5,"Scenario A"  
474,1,2,2,3,1,5,4,2,1,3,2,4,2,5,"Scenario A"  
257,2,1,2,2,3,2,1,1,2,3,2,1,5,4,"Scenario A"  
257,1,2,2,3,2,1,5,2,1,1,1,4,3,3,"Scenario A"  
257,2,2,1,1,2,4,5,1,2,2,2,3,1,1,"Scenario B"  
257,1,1,3,3,1,4,1,2,2,1,2,4,3,2,"Scenario A"  
257,2,1,2,1,4,2,3,1,1,3,3,1,5,3,"Scenario B"  
257,2,2,3,1,1,1,1,1,1,1,3,3,3,4,"Scenario A"  
257,1,2,1,2,3,2,4,2,1,2,2,2,5,3,"Scenario A"  
257,2,2,3,3,4,3,5,2,1,2,1,3,5,2,"Scenario A"  
257,1,2,1,1,2,4,5,2,1,3,3,4,2,4,"Scenario B"  
257,1,1,2,2,2,1,1,2,2,3,1,1,1,2,"Scenario A"  
467,1,2,2,2,4,3,2,1,1,1,3,3,4,3,"Scenario A"  
467,2,1,3,1,2,5,4,1,2,1,3,4,2,1,"Scenario B"  
467,1,1,1,3,1,4,5,2,2,2,2,2,3,5,"Scenario B"  
467,2,1,2,2,1,4,1,1,2,2,1,3,1,2,"Scenario A"  
467,1,1,3,2,2,2,3,2,2,3,3,1,2,4,"Scenario B"  
467,2,1,1,1,4,1,2,1,2,3,2,2,5,3,"Scenario B"  
467,2,1,1,2,1,4,4,1,2,3,1,3,3,5,"Scenario A"  
467,2,2,2,3,3,5,4,1,2,2,3,4,4,1,"Scenario B"  
467,1,1,2,1,4,3,5,2,1,1,2,3,5,1,"Scenario B"  
467,1,1,3,1,1,1,2,2,2,3,3,2,4,1,"Scenario B"  
473,2,1,2,3,1,3,1,1,2,1,1,1,2,2,"Scenario A"  
473,1,1,2,1,2,2,3,2,2,3,2,4,1,2,"Scenario A"  
473,2,1,3,2,3,5,5,1,2,1,3,4,4,4,"Scenario B"

473,1,2,3,3,1,4,3,2,1,1,1,2,1,4,"Scenario A"  
473,1,1,2,1,4,5,5,2,2,1,2,3,4,1,"Scenario B"  
473,2,1,2,3,1,1,3,1,2,2,1,2,3,1,"Scenario B"  
473,1,2,1,2,1,3,4,2,1,3,3,3,5,1,"Scenario B"  
473,2,2,3,2,1,1,5,1,1,2,3,4,2,2,"Scenario B"  
473,2,2,3,1,2,4,2,1,1,1,2,2,2,5,"Scenario A"  
473,2,2,1,1,3,3,4,1,1,2,3,1,3,5,"Scenario A"  
241,1,1,3,3,3,1,2,1,2,2,3,2,2,5,"Scenario B"  
241,1,2,3,2,1,1,4,2,1,2,3,4,5,3,"Scenario A"  
241,2,2,1,2,3,4,2,1,1,3,1,1,4,5,"Scenario B"  
241,1,2,1,1,3,2,1,2,1,1,2,4,3,1,"Scenario B"  
241,1,2,2,2,2,3,2,2,2,3,1,4,5,1,"Scenario A"  
241,2,1,2,1,2,1,4,1,1,1,3,2,5,2,"Scenario B"  
241,2,1,1,3,1,2,1,1,2,3,2,4,3,4,"Scenario B"  
241,1,1,3,3,1,5,2,2,2,2,1,3,1,3,"Scenario A"  
241,1,1,2,2,3,3,3,2,2,3,1,2,4,5,"Scenario B"  
241,1,2,2,3,1,5,4,2,1,3,2,4,2,5,"Scenario B"  
256,2,1,2,2,3,2,1,1,2,3,2,1,5,4,"Scenario B"  
256,1,2,2,3,2,1,5,2,1,1,1,4,3,3,"Scenario A"  
256,2,2,1,1,2,4,5,1,2,2,2,3,1,1,"Scenario A"  
256,1,1,3,3,1,4,1,2,2,1,2,4,3,2,"Scenario A"  
256,2,1,2,1,4,2,3,1,1,3,3,1,5,3,"Scenario A"  
256,2,2,3,1,1,1,1,1,1,1,3,3,3,4,"Scenario A"  
256,1,2,1,2,3,2,4,2,1,2,2,2,5,3,"Scenario B"  
256,2,2,3,3,4,3,5,2,1,2,1,3,5,2,"Scenario B"  
256,1,2,1,1,2,4,5,2,1,3,3,4,2,4,"Scenario A"  
256,1,1,2,2,2,1,1,2,2,3,1,1,1,2,"Scenario A"  
250,1,2,2,2,4,3,2,1,1,1,3,3,4,3,"Scenario A"  
250,2,1,3,1,2,5,4,1,2,1,3,4,2,1,"Scenario B"  
250,1,1,1,3,1,4,5,2,2,2,2,2,3,5,"Scenario A"  
250,2,1,2,2,1,4,1,1,2,2,1,3,1,2,"Scenario A"  
250,1,1,3,2,2,2,3,2,2,3,3,1,2,4,"Scenario A"  
250,2,1,1,1,4,1,2,1,2,3,2,2,5,3,"Scenario B"  
250,2,1,1,2,1,4,4,1,2,3,1,3,3,5,"Scenario B"  
250,2,2,2,3,3,5,4,1,2,2,3,4,4,1,"Scenario A"  
250,1,1,2,1,4,3,5,2,1,1,2,3,5,1,"Scenario B"  
250,1,1,3,1,1,1,2,2,2,3,3,2,4,1,"Scenario B"  
249,2,1,2,3,1,3,1,1,2,1,1,1,2,2,"Scenario A"  
249,1,1,2,1,2,2,3,2,2,3,2,4,1,2,"Scenario B"  
249,2,1,3,2,3,5,5,1,2,1,3,4,4,4,"Scenario B"  
249,1,2,3,3,1,4,3,2,1,1,1,2,1,4,"Scenario A"  
249,1,1,2,1,4,5,5,2,2,1,2,3,4,1,"Scenario B"  
249,2,1,2,3,1,1,3,1,2,2,1,2,3,1,"Scenario A"  
249,1,2,1,2,1,3,4,2,1,3,3,3,5,1,"Scenario B"  
249,2,2,3,2,1,1,5,1,1,2,3,4,2,2,"Scenario B"  
249,2,2,3,1,2,4,2,1,1,1,2,2,2,5,"Scenario A"  
249,2,2,1,1,3,3,4,1,1,2,3,1,3,5,"Scenario A"  
469,1,1,3,3,3,1,2,1,2,2,3,2,2,5,"Scenario B"  
469,1,2,3,2,1,1,4,2,1,2,3,4,5,3,"Scenario B"  
469,2,2,1,2,3,4,2,1,1,3,1,1,4,5,"Scenario A"  
469,1,2,1,1,3,2,1,2,1,1,2,4,3,1,"Scenario A"  
469,1,2,2,2,2,3,2,2,2,3,1,4,5,1,"Scenario A"  
469,2,1,2,1,2,1,4,1,1,1,3,2,5,2,"Scenario B"  
469,2,1,1,3,1,2,1,1,2,3,2,4,3,4,"Scenario A"  
469,1,1,3,3,1,5,2,2,2,2,1,3,1,3,"Scenario A"  
469,1,1,2,2,3,3,3,2,2,3,1,2,4,5,"Scenario A"  
469,1,2,2,3,1,5,4,2,1,3,2,4,2,5,"Scenario A"

253,2,1,2,2,3,2,1,1,2,3,2,1,5,4,"Scenario B"  
253,1,2,2,3,2,1,5,2,1,1,1,4,3,3,"Scenario A"  
253,2,2,1,1,2,4,5,1,2,2,2,3,1,1,"Scenario B"  
253,1,1,3,3,1,4,1,2,2,1,2,4,3,2,"Scenario A"  
253,2,1,2,1,4,2,3,1,1,3,3,1,5,3,"Scenario B"  
253,2,2,3,1,1,1,1,1,1,1,3,3,3,4,"Scenario B"  
253,1,2,1,2,3,2,4,2,1,2,2,2,5,3,"Scenario A"  
253,2,2,3,3,4,3,5,2,1,2,1,3,5,2,"Scenario A"  
253,1,2,1,1,2,4,5,2,1,3,3,4,2,4,"Scenario B"  
253,1,1,2,2,2,1,1,2,2,3,1,1,1,2,"Scenario A"  
466,1,2,2,2,4,3,2,1,1,1,3,3,4,3,"Scenario A"  
466,2,1,3,1,2,5,4,1,2,1,3,4,2,1,"Scenario B"  
466,1,1,1,3,1,4,5,2,2,2,2,2,3,5,"Scenario B"  
466,2,1,2,2,1,4,1,1,2,2,1,3,1,2,"Scenario A"  
466,1,1,3,2,2,2,3,2,2,3,3,1,2,4,"Scenario A"  
466,2,1,1,1,4,1,2,1,2,3,2,2,5,3,"Scenario B"  
466,2,1,1,2,1,4,4,1,2,3,1,3,3,5,"Scenario A"  
466,2,2,2,3,3,5,4,1,2,2,3,4,4,1,"Scenario B"  
466,1,1,2,1,4,3,5,2,1,1,2,3,5,1,"Scenario B"  
466,1,1,3,1,1,1,2,2,2,3,3,2,4,1,"Scenario B"  
224,2,1,2,3,1,3,1,1,2,1,1,1,2,2,"Scenario A"  
224,1,1,2,1,2,2,3,2,2,3,2,4,1,2,"Scenario B"  
224,2,1,3,2,3,5,5,1,2,1,3,4,4,4,"Scenario B"  
224,1,2,3,3,1,4,3,2,1,1,1,2,1,4,"Scenario B"  
224,1,1,2,1,4,5,5,2,2,1,2,3,4,1,"Scenario B"  
224,2,1,2,3,1,1,3,1,2,2,1,2,3,1,"Scenario B"  
224,1,2,1,2,1,3,4,2,1,3,3,3,5,1,"Scenario B"  
224,2,2,3,2,1,1,5,1,1,2,3,4,2,2,"Scenario B"  
224,2,2,3,1,2,4,2,1,1,1,2,2,2,5,"Scenario B"  
224,2,2,1,1,3,3,4,1,1,2,3,1,3,5,"Scenario B"  
219,1,1,3,3,3,1,2,1,2,2,3,2,2,5,"Scenario A"  
219,1,2,3,2,1,1,4,2,1,2,3,4,5,3,"Scenario B"  
219,2,2,1,2,3,4,2,1,1,3,1,1,4,5,"Scenario B"  
219,1,2,1,1,3,2,1,2,1,1,2,4,3,1,"Scenario B"  
219,1,2,2,2,2,3,2,2,2,3,1,4,5,1,"Scenario A"  
219,2,1,2,1,2,1,4,1,1,1,3,2,5,2,"Scenario B"  
219,2,1,1,3,1,2,1,1,2,3,2,4,3,4,"Scenario A"  
219,1,1,3,3,1,5,2,2,2,2,1,3,1,3,"Scenario B"  
219,1,1,2,2,3,3,3,2,2,3,1,2,4,5,"Scenario B"  
219,1,2,2,3,1,5,4,2,1,3,2,4,2,5,"Scenario B"  
226,2,1,2,2,3,2,1,1,2,3,2,1,5,4,"Scenario A"  
226,1,2,2,3,2,1,5,2,1,1,1,4,3,3,"Scenario A"  
226,2,2,1,1,2,4,5,1,2,2,2,3,1,1,"Scenario A"  
226,1,1,3,3,1,4,1,2,2,1,2,4,3,2,"Scenario B"  
226,2,1,2,1,4,2,3,1,1,3,3,1,5,3,"Scenario B"  
226,2,2,3,1,1,1,1,1,1,1,3,3,3,4,"Scenario A"  
226,1,2,1,2,3,2,4,2,1,2,2,2,5,3,"Scenario B"  
226,2,2,3,3,4,3,5,2,1,2,1,3,5,2,"Scenario B"  
226,1,2,1,1,2,4,5,2,1,3,3,4,2,4,"Scenario A"  
226,1,1,2,2,2,1,1,2,2,3,1,1,1,2,"Scenario B"  
222,1,2,2,2,4,3,2,1,1,1,3,3,4,3,"Scenario A"  
222,2,1,3,1,2,5,4,1,2,1,3,4,2,1,"Scenario B"  
222,1,1,1,3,1,4,5,2,2,2,2,2,3,5,"Scenario B"  
222,2,1,2,2,1,4,1,1,2,2,1,3,1,2,"Scenario A"  
222,1,1,3,2,2,2,3,2,2,3,3,1,2,4,"Scenario B"  
222,2,1,1,1,4,1,2,1,2,3,2,2,5,3,"Scenario B"  
222,2,1,1,2,1,4,4,1,2,3,1,3,3,5,"Scenario A"

222,2,2,2,3,3,5,4,1,2,2,3,4,4,1,"Scenario B"  
222,1,1,2,1,4,3,5,2,1,1,2,3,5,1,"Scenario B"  
222,1,1,3,1,1,1,2,2,2,3,3,2,4,1,"Scenario B"  
227,2,1,2,3,1,3,1,1,2,1,1,1,2,2,"Scenario A"  
227,1,1,2,1,2,2,3,2,2,3,2,4,1,2,"Scenario B"  
227,2,1,3,2,3,5,5,1,2,1,3,4,4,4,"Scenario A"  
227,1,2,3,3,1,4,3,2,1,1,1,2,1,4,"Scenario A"  
227,1,1,2,1,4,5,5,2,2,1,2,3,4,1,"Scenario B"  
227,2,1,2,3,1,1,3,1,2,2,1,2,3,1,"Scenario B"  
227,1,2,1,2,1,3,4,2,1,3,3,3,5,1,"Scenario A"  
227,2,2,3,2,1,1,5,1,1,2,3,4,2,2,"Scenario A"  
227,2,2,3,1,2,4,2,1,1,1,2,2,2,5,"Scenario A"  
227,2,2,1,1,3,3,4,1,1,2,3,1,3,5,"Scenario A"  
225,1,1,3,3,3,1,2,1,2,2,3,2,2,5,"Scenario A"  
225,1,2,3,2,1,1,4,2,1,2,3,4,5,3,"Scenario A"  
225,2,2,1,2,3,4,2,1,1,3,1,1,4,5,"Scenario B"  
225,1,2,1,1,3,2,1,2,1,1,2,4,3,1,"Scenario B"  
225,1,2,2,2,2,3,2,2,2,3,1,4,5,1,"Scenario A"  
225,2,1,2,1,2,1,4,1,1,1,3,2,5,2,"Scenario A"  
225,2,1,1,3,1,2,1,1,2,3,2,4,3,4,"Scenario A"  
225,1,1,3,3,1,5,2,2,2,2,1,3,1,3,"Scenario A"  
225,1,1,2,2,3,3,3,2,2,3,1,2,4,5,"Scenario A"  
225,1,2,2,3,1,5,4,2,1,3,2,4,2,5,"Scenario A"  
228,2,1,2,2,3,2,1,1,2,3,2,1,5,4,"Scenario A"  
228,1,2,2,3,2,1,5,2,1,1,1,4,3,3,"Scenario B"  
228,2,2,1,1,2,4,5,1,2,2,2,3,1,1,"Scenario B"  
228,1,1,3,3,1,4,1,2,2,1,2,4,3,2,"Scenario A"  
228,2,1,2,1,4,2,3,1,1,3,3,1,5,3,"Scenario B"  
228,2,2,3,1,1,1,1,1,1,1,3,3,3,4,"Scenario A"  
228,1,2,1,2,3,2,4,2,1,2,2,2,5,3,"Scenario B"  
228,2,2,3,3,4,3,5,2,1,2,1,3,5,2,"Scenario B"  
228,1,2,1,1,2,4,5,2,1,3,3,4,2,4,"Scenario B"  
228,1,1,2,2,2,1,1,2,2,3,1,1,1,2,"Scenario A"  
218,1,2,2,2,4,3,2,1,1,1,3,3,4,3,"Scenario A"  
218,2,1,3,1,2,5,4,1,2,1,3,4,2,1,"Scenario B"  
218,1,1,1,3,1,4,5,2,2,2,2,2,3,5,"Scenario B"  
218,2,1,2,2,1,4,1,1,2,2,1,3,1,2,"Scenario B"  
218,1,1,3,2,2,2,3,2,2,3,3,1,2,4,"Scenario B"  
218,2,1,1,1,4,1,2,1,2,3,2,2,5,3,"Scenario B"  
218,2,1,1,2,1,4,4,1,2,3,1,3,3,5,"Scenario A"  
218,2,2,2,3,3,5,4,1,2,2,3,4,4,1,"Scenario A"  
218,1,1,2,1,4,3,5,2,1,1,2,3,5,1,"Scenario B"  
218,1,1,3,1,1,1,2,2,2,3,3,2,4,1,"Scenario B"  
232,2,1,2,3,1,3,1,1,2,1,1,1,2,2,"Scenario A"  
232,1,1,2,1,2,2,3,2,2,3,2,4,1,2,"Scenario B"  
232,2,1,3,2,3,5,5,1,2,1,3,4,4,4,"Scenario A"  
232,1,2,3,3,1,4,3,2,1,1,1,2,1,4,"Scenario A"  
232,1,1,2,1,4,5,5,2,2,1,2,3,4,1,"Scenario B"  
232,2,1,2,3,1,2,3,1,1,3,1,2,2,1,2,3,1,"Scenario A"  
232,1,2,1,2,1,3,4,2,1,3,3,3,5,1,"Scenario B"  
232,2,2,3,2,1,1,5,1,1,2,3,4,2,2,"Scenario A"  
232,2,2,3,1,2,4,2,1,1,1,2,2,2,5,"Scenario B"  
232,2,2,1,1,3,3,4,1,1,2,3,1,3,5,"Scenario B"  
229,1,1,3,3,3,1,2,1,2,2,3,2,2,5,"Scenario A"  
229,1,2,3,2,1,1,4,2,1,2,3,4,5,3,"Scenario B"  
229,2,2,1,2,3,4,2,1,1,3,1,1,4,5,"Scenario A"  
229,1,2,1,1,3,2,1,2,1,1,2,4,3,1,"Scenario A"

229,1,2,2,2,2,3,2,2,2,3,1,4,5,1,"Scenario B"  
229,2,1,2,1,2,1,4,1,1,1,3,2,5,2,"Scenario B"  
229,2,1,1,3,1,2,1,1,2,3,2,4,3,4,"Scenario A"  
229,1,1,3,3,1,5,2,2,2,2,1,3,1,3,"Scenario A"  
229,1,1,2,2,3,3,3,2,2,3,1,2,4,5,"Scenario A"  
229,1,2,2,3,1,5,4,2,1,3,2,4,2,5,"Scenario A"  
223,2,1,2,2,3,2,1,1,2,3,2,1,5,4,"Scenario A"  
223,1,2,2,3,2,1,5,2,1,1,1,4,3,3,"Scenario B"  
223,2,2,1,1,2,4,5,1,2,2,2,3,1,1,"Scenario A"  
223,1,1,3,3,1,4,1,2,2,1,2,4,3,2,"Scenario B"  
223,2,1,2,1,4,2,3,1,1,3,3,1,5,3,"Scenario A"  
223,2,2,3,1,1,1,1,1,1,1,3,3,3,4,"Scenario A"  
223,1,2,1,2,3,2,4,2,1,2,2,2,5,3,"Scenario B"  
223,2,2,3,3,4,3,5,2,1,2,1,3,5,2,"Scenario A"  
223,1,2,1,1,2,4,5,2,1,3,3,4,2,4,"Scenario B"  
223,1,1,2,2,2,1,1,2,2,3,1,1,1,2,"Scenario A"  
231,1,2,2,2,4,3,2,1,1,1,3,3,4,3,"Scenario A"  
231,2,1,3,1,2,5,4,1,2,1,3,4,2,1,"Scenario B"  
231,1,1,1,3,1,4,5,2,2,2,2,2,3,5,"Scenario A"  
231,2,1,2,2,1,4,1,1,2,2,1,3,1,2,"Scenario A"  
231,1,1,3,2,2,2,3,2,2,3,3,1,2,4,"Scenario A"  
231,2,1,1,1,4,1,2,1,2,3,2,2,5,3,"Scenario B"  
231,2,1,1,2,1,4,4,1,2,3,1,3,3,5,"Scenario B"  
231,2,2,2,3,3,5,4,1,2,2,3,4,4,1,"Scenario B"  
231,1,1,2,1,4,3,5,2,1,1,2,3,5,1,"Scenario B"  
231,1,1,3,1,1,1,2,2,2,3,3,2,4,1,"Scenario B"  
220,2,1,2,3,1,3,1,1,2,1,1,1,2,2,"Scenario A"  
220,1,1,2,1,2,2,3,2,2,3,2,4,1,2,"Scenario A"  
220,2,1,3,2,3,5,5,1,2,1,3,4,4,4,"Scenario B"  
220,1,2,3,3,1,4,3,2,1,1,1,2,1,4,"Scenario A"  
220,1,1,2,1,4,5,5,2,2,1,2,3,4,1,"Scenario B"  
220,2,1,2,3,1,1,3,1,2,2,1,2,3,1,"Scenario A"  
220,1,2,1,2,1,3,4,2,1,3,3,3,5,1,"Scenario B"  
220,2,2,3,2,1,1,5,1,1,2,3,4,2,2,"Scenario A"  
220,2,2,3,1,2,4,2,1,1,1,2,2,2,5,"Scenario A"  
220,2,2,1,1,3,3,4,1,1,2,3,1,3,5,"Scenario A"  
230,1,1,3,3,3,1,2,1,2,2,3,2,2,5,"Scenario B"  
230,1,2,3,2,1,1,4,2,1,2,3,4,5,3,"Scenario B"  
230,2,2,1,2,3,4,2,1,1,3,1,1,4,5,"Scenario A"  
230,1,2,1,1,3,2,1,2,1,1,2,4,3,1,"Scenario B"  
230,1,2,2,2,2,3,2,2,2,3,1,4,5,1,"Scenario A"  
230,2,1,2,1,2,1,4,1,1,1,3,2,5,2,"Scenario B"  
230,2,1,1,3,1,2,1,1,2,3,2,4,3,4,"Scenario B"  
230,1,1,3,3,1,5,2,2,2,2,1,3,1,3,"Scenario A"  
230,1,1,2,2,3,3,3,2,2,3,1,2,4,5,"Scenario B"  
230,1,2,2,3,1,5,4,2,1,3,2,4,2,5,"Scenario A"  
221,2,1,2,2,3,2,1,1,2,3,2,1,5,4,"Scenario A"  
221,1,2,2,3,2,1,5,2,1,1,1,4,3,3,"Scenario B"  
221,2,2,1,1,2,4,5,1,2,2,2,3,1,1,"Scenario A"  
221,1,1,3,3,1,4,1,2,2,1,2,4,3,2,"Scenario B"  
221,2,1,2,1,4,2,3,1,1,3,3,1,5,3,"Scenario A"  
221,2,2,3,1,1,1,1,1,1,1,3,3,3,4,"Scenario B"  
221,1,2,1,2,3,2,4,2,1,2,2,2,5,3,"Scenario B"  
221,2,2,3,3,4,3,5,2,1,2,1,3,5,2,"Scenario A"  
221,1,2,1,1,2,4,5,2,1,3,3,4,2,4,"Scenario B"  
221,1,1,2,2,2,1,1,2,2,3,1,1,1,2,"Scenario B"  
182,1,2,2,2,4,3,2,1,1,1,3,3,4,3,"Scenario B"

182,2,1,3,1,2,5,4,1,2,1,3,4,2,1,"Scenario B"  
182,1,1,1,3,1,4,5,2,2,2,2,2,3,5,"Scenario A"  
182,2,1,2,2,1,4,1,1,2,2,1,3,1,2,"Scenario A"  
182,1,1,3,2,2,2,3,2,2,3,3,1,2,4,"Scenario A"  
182,2,1,1,1,4,1,2,1,2,3,2,2,5,3,"Scenario A"  
182,2,1,1,2,1,4,4,1,2,3,1,3,3,5,"Scenario A"  
182,2,2,2,3,3,5,4,1,2,2,3,4,4,1,"Scenario A"  
182,1,1,2,1,4,3,5,2,1,1,2,3,5,1,"Scenario B"  
182,1,1,3,1,1,1,2,2,2,3,3,2,4,1,"Scenario A"  
160,2,1,2,3,1,3,1,1,2,1,1,1,2,2,"Scenario A"  
160,1,1,2,1,2,2,3,2,2,3,2,4,1,2,"Scenario B"  
160,2,1,3,2,3,5,5,1,2,1,3,4,4,4,"Scenario B"  
160,1,2,3,3,1,4,3,2,1,1,1,2,1,4,"Scenario A"  
160,1,1,2,1,4,5,5,2,2,1,2,3,4,1,"Scenario B"  
160,2,1,2,3,1,1,3,1,2,2,1,2,3,1,"Scenario A"  
160,1,2,1,2,1,3,4,2,1,3,3,3,5,1,"Scenario A"  
160,2,2,3,2,1,1,5,1,1,2,3,4,2,2,"Scenario A"  
160,2,2,3,1,2,4,2,1,1,1,2,2,2,5,"Scenario A"  
160,2,2,1,1,3,3,4,1,1,2,3,1,3,5,"Scenario B"  
186,1,1,3,3,3,1,2,1,2,2,3,2,2,5,"Scenario B"  
186,1,2,3,2,1,1,4,2,1,2,3,4,5,3,"Scenario A"  
186,2,2,1,2,3,4,2,1,1,3,1,1,4,5,"Scenario A"  
186,1,2,1,1,3,2,1,2,1,1,2,4,3,1,"Scenario A"  
186,1,2,2,2,2,3,2,2,2,3,1,4,5,1,"Scenario A"  
186,2,1,2,1,2,1,4,1,1,1,3,2,5,2,"Scenario A"  
186,2,1,1,3,1,2,1,1,2,3,2,4,3,4,"Scenario B"  
186,1,1,3,3,1,5,2,2,2,2,1,3,1,3,"Scenario B"  
186,1,1,2,2,3,3,3,2,2,3,1,2,4,5,"Scenario A"  
186,1,2,2,3,1,5,4,2,1,3,2,4,2,5,"Scenario A"  
27,2,1,2,2,3,2,1,1,2,3,2,1,5,4,"Scenario B"  
27,1,2,2,3,2,1,5,2,1,1,1,4,3,3,"Scenario A"  
27,2,2,1,1,2,4,5,1,2,2,2,3,1,1,"Scenario B"  
27,1,1,3,3,1,4,1,2,2,1,2,4,3,2,"Scenario B"  
27,2,1,2,1,4,2,3,1,1,3,3,1,5,3,"Scenario B"  
27,2,2,3,1,1,1,1,1,1,1,3,3,3,4,"Scenario A"  
27,1,2,1,2,3,2,4,2,1,2,2,2,5,3,"Scenario A"  
27,2,2,3,3,4,3,5,2,1,2,1,3,5,2,"Scenario A"  
27,1,2,1,1,2,4,5,2,1,3,3,4,2,4,"Scenario B"  
27,1,1,2,2,2,1,1,2,2,3,1,1,1,2,"Scenario B"  
26,1,2,2,2,4,3,2,1,1,1,3,3,4,3,"Scenario A"  
26,2,1,3,1,2,5,4,1,2,1,3,4,2,1,"Scenario A"  
26,1,1,1,3,1,4,5,2,2,2,2,2,3,5,"Scenario A"  
26,2,1,2,2,1,4,1,1,2,2,1,3,1,2,"Scenario A"  
26,1,1,3,2,2,2,3,2,2,3,3,1,2,4,"Scenario A"  
26,2,1,1,1,4,1,2,1,2,3,2,2,5,3,"Scenario A"  
26,2,1,1,2,1,4,4,1,2,3,1,3,3,5,"Scenario A"  
26,2,2,2,3,3,5,4,1,2,2,3,4,4,1,"Scenario A"  
26,1,1,2,1,4,3,5,2,1,1,2,3,5,1,"Scenario A"  
26,1,1,3,1,1,1,2,2,2,3,3,2,4,1,"Scenario A"  
386,2,1,2,3,1,3,1,1,2,1,1,1,2,2,"Scenario A"  
386,1,1,2,1,2,2,3,2,2,3,2,4,1,2,"Scenario B"  
386,2,1,3,2,3,5,5,1,2,1,3,4,4,4,"Scenario A"  
386,1,2,3,3,1,4,3,2,1,1,1,2,1,4,"Scenario B"  
386,1,1,2,1,4,5,5,2,2,1,2,3,4,1,"Scenario A"  
386,2,1,2,3,1,1,3,1,2,2,1,2,3,1,"Scenario A"  
386,1,2,1,2,1,3,4,2,1,3,3,3,5,1,"Scenario A"  
386,2,2,3,2,1,1,5,1,1,2,3,4,2,2,"Scenario B"

386,2,2,3,1,2,4,2,1,1,1,2,2,2,5,"Scenario A"  
386,2,2,1,1,3,3,4,1,1,2,3,1,3,5,"Scenario A"  
169,1,1,3,3,3,1,2,1,2,2,3,2,2,5,"Scenario B"  
169,1,2,3,2,1,1,4,2,1,2,3,4,5,3,"Scenario A"  
169,2,2,1,2,3,4,2,1,1,3,1,1,4,5,"Scenario B"  
169,1,2,1,1,3,2,1,2,1,1,2,4,3,1,"Scenario B"  
169,1,2,2,2,2,3,2,2,2,3,1,4,5,1,"Scenario B"  
169,2,1,2,1,2,1,4,1,1,1,3,2,5,2,"Scenario B"  
169,2,1,1,3,1,2,1,1,2,3,2,4,3,4,"Scenario A"  
169,1,1,3,3,1,5,2,2,2,2,1,3,1,3,"Scenario B"  
169,1,1,2,2,3,3,3,2,2,3,1,2,4,5,"Scenario A"  
169,1,2,2,3,1,5,4,2,1,3,2,4,2,5,"Scenario A"  
167,2,1,2,2,3,2,1,1,2,3,2,1,5,4,"Scenario B"  
167,1,2,2,3,2,1,5,2,1,1,1,4,3,3,"Scenario A"  
167,2,2,1,1,2,4,5,1,2,2,2,3,1,1,"Scenario A"  
167,1,1,3,3,1,4,1,2,2,1,2,4,3,2,"Scenario A"  
167,2,1,2,1,4,2,3,1,1,3,3,1,5,3,"Scenario B"  
167,2,2,3,1,1,1,1,1,1,1,3,3,3,4,"Scenario A"  
167,1,2,1,2,3,2,4,2,1,2,2,2,5,3,"Scenario B"  
167,2,2,3,3,4,3,5,2,1,2,1,3,5,2,"Scenario B"  
167,1,2,1,1,2,4,5,2,1,3,3,4,2,4,"Scenario A"  
167,1,1,2,2,2,1,1,2,2,3,1,1,1,2,"Scenario B"  
154,1,2,2,2,4,3,2,1,1,1,3,3,4,3,"Scenario A"  
154,2,1,3,1,2,5,4,1,2,1,3,4,2,1,"Scenario A"  
154,1,1,1,3,1,4,5,2,2,2,2,2,3,5,"Scenario A"  
154,2,1,2,2,1,4,1,1,2,2,1,3,1,2,"Scenario A"  
154,1,1,3,2,2,2,3,2,2,3,3,1,2,4,"Scenario B"  
154,2,1,1,1,4,1,2,1,2,3,2,2,5,3,"Scenario A"  
154,2,1,1,2,1,4,4,1,2,3,1,3,3,5,"Scenario A"  
154,2,2,2,3,3,5,4,1,2,2,3,4,4,1,"Scenario B"  
154,1,1,2,1,4,3,5,2,1,1,2,3,5,1,"Scenario A"  
154,1,1,3,1,1,1,2,2,2,3,3,2,4,1,"Scenario A"  
168,2,1,2,3,1,3,1,1,2,1,1,1,2,2,"Scenario A"  
168,1,1,2,1,2,2,3,2,2,3,2,4,1,2,"Scenario A"  
168,2,1,3,2,3,5,5,1,2,1,3,4,4,4,"Scenario B"  
168,1,2,3,3,1,4,3,2,1,1,1,2,1,4,"Scenario B"  
168,1,1,2,1,4,5,5,2,2,1,2,3,4,1,"Scenario A"  
168,2,1,2,3,1,1,3,1,2,2,1,2,3,1,"Scenario A"  
168,1,2,1,2,1,3,4,2,1,3,3,3,5,1,"Scenario A"  
168,2,2,3,2,1,1,5,1,1,2,3,4,2,2,"Scenario B"  
168,2,2,3,1,2,4,2,1,1,1,2,2,2,5,"Scenario B"  
168,2,2,1,1,3,3,4,1,1,2,3,1,3,5,"Scenario B"  
193,1,1,3,3,3,1,2,1,2,2,3,2,2,5,"Scenario A"  
193,1,2,3,2,1,1,4,2,1,2,3,4,5,3,"Scenario B"  
193,2,2,1,2,3,4,2,1,1,3,1,1,4,5,"Scenario B"  
193,1,2,1,1,3,2,1,2,1,1,2,4,3,1,"Scenario B"  
193,1,2,2,2,2,3,2,2,2,3,1,4,5,1,"Scenario A"  
193,2,1,2,1,2,1,4,1,1,1,1,3,2,5,2,"Scenario A"  
193,2,1,1,3,1,2,1,1,2,3,2,4,3,4,"Scenario B"  
193,1,1,3,3,1,5,2,2,2,2,1,3,1,3,"Scenario B"  
193,1,1,2,2,3,3,3,2,2,3,1,2,4,5,"Scenario B"  
193,1,2,2,3,1,5,4,2,1,3,2,4,2,5,"Scenario A"  
187,2,1,2,2,3,2,1,1,2,3,2,1,5,4,"Scenario A"  
187,1,2,2,3,2,1,5,2,1,1,1,4,3,3,"Scenario B"  
187,2,2,1,1,2,4,5,1,2,2,2,3,1,1,"Scenario B"  
187,1,1,3,3,1,4,1,2,2,1,2,4,3,2,"Scenario B"  
187,2,1,2,1,4,2,3,1,1,3,3,1,5,3,"Scenario B"



187,2,2,3,1,1,1,1,1,1,1,3,3,3,4,"Scenario B"  
187,1,2,1,2,3,2,4,2,1,2,2,2,5,3,"Scenario A"  
187,2,2,3,3,4,3,5,2,1,2,1,3,5,2,"Scenario A"  
187,1,2,1,1,2,4,5,2,1,3,3,4,2,4,"Scenario A"  
187,1,1,2,2,2,1,1,2,2,3,1,1,1,2,"Scenario A"  
188,1,2,2,2,4,3,2,1,1,1,3,3,4,3,"Scenario A"  
188,2,1,3,1,2,5,4,1,2,1,3,4,2,1,"Scenario A"  
188,1,1,1,3,1,4,5,2,2,2,2,2,3,5,"Scenario A"  
188,2,1,2,2,1,4,1,1,2,2,1,3,1,2,"Scenario B"  
188,1,1,3,2,2,2,3,2,2,3,3,1,2,4,"Scenario B"  
188,2,1,1,1,4,1,2,1,2,3,2,2,5,3,"Scenario A"  
188,2,1,1,2,1,4,4,1,2,3,1,3,3,5,"Scenario B"  
188,2,2,2,3,3,5,4,1,2,2,3,4,4,1,"Scenario A"  
188,1,1,2,1,4,3,5,2,1,1,2,3,5,1,"Scenario A"  
188,1,1,3,1,1,1,2,2,2,3,3,2,4,1,"Scenario A"  
315,2,1,2,3,1,3,1,1,2,1,1,1,2,2,"Scenario A"  
315,1,1,2,1,2,2,3,2,2,3,2,4,1,2,"Scenario B"  
315,2,1,3,2,3,5,5,1,2,1,3,4,4,4,"Scenario A"  
315,1,2,3,3,1,4,3,2,1,1,1,2,1,4,"Scenario A"  
315,1,1,2,1,4,5,5,2,2,1,2,3,4,1,"Scenario B"  
315,2,1,2,3,1,1,3,1,2,2,1,2,3,1,"Scenario A"  
315,1,2,1,2,1,3,4,2,1,3,3,3,5,1,"Scenario B"  
315,2,2,3,2,1,1,5,1,1,2,3,4,2,2,"Scenario A"  
315,2,2,3,1,2,4,2,1,1,1,2,2,2,5,"Scenario A"  
315,2,2,1,1,3,3,4,1,1,2,3,1,3,5,"Scenario A"  
314,1,1,3,3,3,1,2,1,2,2,3,2,2,5,"Scenario A"  
314,1,2,3,2,1,1,4,2,1,2,3,4,5,3,"Scenario A"  
314,2,2,1,2,3,4,2,1,1,3,1,1,4,5,"Scenario B"  
314,1,2,1,1,3,2,1,2,1,1,2,4,3,1,"Scenario B"  
314,1,2,2,2,2,3,2,2,2,3,1,4,5,1,"Scenario A"  
314,2,1,2,1,2,1,4,1,1,1,3,2,5,2,"Scenario A"  
314,2,1,1,3,1,2,1,1,2,3,2,4,3,4,"Scenario A"  
314,1,1,3,3,1,5,2,2,2,2,1,3,1,3,"Scenario A"  
314,1,1,2,2,3,3,3,2,2,3,1,2,4,5,"Scenario A"  
314,1,2,2,3,1,5,4,2,1,3,2,4,2,5,"Scenario B"  
472,2,1,2,2,3,2,1,1,2,3,2,1,5,4,"Scenario A"  
472,1,2,2,3,2,1,5,2,1,1,1,4,3,3,"Scenario A"  
472,2,2,1,1,2,4,5,1,2,2,2,3,1,1,"Scenario A"  
472,1,1,3,3,1,4,1,2,2,1,2,4,3,2,"Scenario A"  
472,2,1,2,1,4,2,3,1,1,3,3,1,5,3,"Scenario B"  
472,2,2,3,1,1,1,1,1,1,1,3,3,3,4,"Scenario A"  
472,1,2,1,2,3,2,4,2,1,2,2,2,5,3,"Scenario A"  
472,2,2,3,3,4,3,5,2,1,2,1,3,5,2,"Scenario B"  
472,1,2,1,1,2,4,5,2,1,3,3,4,2,4,"Scenario B"  
472,1,1,2,2,2,1,1,2,2,3,1,1,1,2,"Scenario B"  
364,1,2,2,2,4,3,2,1,1,1,3,3,4,3,"Scenario A"  
364,2,1,3,1,2,5,4,1,2,1,3,4,2,1,"Scenario B"  
364,1,1,1,3,1,4,5,2,2,2,2,2,3,5,"Scenario B"  
364,2,1,2,2,1,4,1,1,2,2,1,3,1,2,"Scenario B"  
364,1,1,3,2,2,2,3,2,2,3,3,1,2,4,"Scenario B"  
364,2,1,1,1,4,1,2,1,2,3,2,2,5,3,"Scenario B"  
364,2,1,1,2,1,4,4,1,2,3,1,3,3,5,"Scenario B"  
364,2,2,2,3,3,5,4,1,2,2,3,4,4,1,"Scenario A"  
364,1,1,2,1,4,3,5,2,1,1,2,3,5,1,"Scenario B"  
364,1,1,3,1,1,1,2,2,2,3,3,2,4,1,"Scenario B"  
340,1,1,2,1,2,2,3,2,2,3,2,4,1,2,"Scenario A"  
340,2,1,3,2,3,5,5,1,2,1,3,4,4,4,"Scenario B"

340,1,2,3,3,1,4,3,2,1,1,1,2,1,4,"Scenario A"  
340,1,1,2,1,4,5,5,2,2,1,2,3,4,1,"Scenario B"  
340,2,1,2,3,1,1,3,1,2,2,1,2,3,1,"Scenario B"  
340,1,2,1,2,1,3,4,2,1,3,3,3,5,1,"Scenario B"  
340,2,2,3,2,1,1,5,1,1,2,3,4,2,2,"Scenario A"  
340,2,2,3,1,2,4,2,1,1,1,2,2,2,5,"Scenario A"  
340,2,2,1,1,3,3,4,1,1,2,3,1,3,5,"Scenario A"  
343,1,1,3,3,3,1,2,1,2,2,3,2,2,5,"Scenario A"  
343,1,2,3,2,1,1,4,2,1,2,3,4,5,3,"Scenario A"  
343,2,2,1,2,3,4,2,1,1,3,1,1,4,5,"Scenario A"  
343,1,2,1,1,3,2,1,2,1,1,2,4,3,1,"Scenario B"  
343,1,2,2,2,2,3,2,2,2,3,1,4,5,1,"Scenario B"  
343,2,1,2,2,1,2,1,4,1,1,1,3,2,5,2,"Scenario B"  
343,2,1,1,3,1,2,1,1,2,3,2,4,3,4,"Scenario B"  
343,1,1,3,3,1,5,2,2,2,2,1,3,1,3,"Scenario B"  
343,1,1,2,2,3,3,3,2,2,3,1,2,4,5,"Scenario B"  
343,1,2,2,3,1,5,4,2,1,3,2,4,2,5,"Scenario B"  
338,2,1,2,2,3,2,1,1,2,3,2,1,5,4,"Scenario A"  
338,1,2,2,3,2,1,5,2,1,1,1,4,3,3,"Scenario A"  
338,2,2,1,1,2,4,5,1,2,2,2,3,1,1,"Scenario B"  
338,1,1,3,3,1,4,1,2,2,1,2,4,3,2,"Scenario A"  
338,2,1,2,1,4,2,3,1,1,3,3,1,5,3,"Scenario B"  
338,2,2,3,1,1,1,1,1,1,1,3,3,3,4,"Scenario A"  
338,1,2,1,2,3,2,4,2,1,2,2,2,5,3,"Scenario B"  
338,2,2,3,3,4,3,5,2,1,2,1,3,5,2,"Scenario B"  
338,1,2,1,1,2,4,5,2,1,3,3,4,2,4,"Scenario B"  
338,1,1,2,2,2,1,1,2,2,3,1,1,1,2,"Scenario A"  
371,1,2,2,2,4,3,2,1,1,1,3,3,4,3,"Scenario A"  
371,2,1,3,1,2,5,4,1,2,1,3,4,2,1,"Scenario A"  
371,1,1,1,3,1,4,5,2,2,2,2,2,3,5,"Scenario B"  
371,2,1,2,2,1,4,1,1,2,2,1,3,1,2,"Scenario A"  
371,1,1,3,2,2,2,3,2,2,3,3,1,2,4,"Scenario A"  
371,2,1,1,1,4,1,2,1,2,3,2,2,5,3,"Scenario A"  
371,2,1,1,2,1,4,4,1,2,3,1,3,3,5,"Scenario B"  
371,2,2,2,3,3,5,4,1,2,2,3,4,4,1,"Scenario A"  
371,1,1,2,1,4,3,5,2,1,1,2,3,5,1,"Scenario B"  
371,1,1,3,1,1,1,2,2,2,3,3,2,4,1,"Scenario B"  
375,2,1,2,3,1,3,1,1,2,1,1,1,2,2,"Scenario A"  
375,1,1,2,1,2,2,3,2,2,3,2,4,1,2,"Scenario A"  
375,2,1,3,2,3,5,5,1,2,1,3,4,4,4,"Scenario A"  
375,1,2,3,3,1,4,3,2,1,1,1,2,1,4,"Scenario B"  
375,1,1,2,1,4,5,5,2,2,1,2,3,4,1,"Scenario A"  
375,2,1,2,3,1,1,3,1,2,2,1,2,3,1,"Scenario A"  
375,1,2,1,2,1,3,4,2,1,3,3,3,5,1,"Scenario A"  
375,2,2,3,2,1,1,5,1,1,2,3,4,2,2,"Scenario A"  
375,2,2,3,1,2,4,2,1,1,1,2,2,2,5,"Scenario A"  
375,2,2,1,1,3,3,4,1,1,2,3,1,3,5,"Scenario A"  
365,1,1,3,3,3,1,2,1,2,2,3,2,2,5,"Scenario A"  
365,1,2,3,2,1,1,4,2,1,2,3,4,5,3,"Scenario A"  
365,2,2,1,2,3,4,2,1,1,3,1,1,4,5,"Scenario A"  
365,1,2,1,1,3,2,1,2,1,1,2,4,3,1,"Scenario B"  
365,1,2,2,2,2,3,2,2,2,3,1,4,5,1,"Scenario B"  
365,2,1,2,1,2,1,4,1,1,1,3,2,5,2,"Scenario A"  
365,2,1,1,3,1,2,1,1,2,3,2,4,3,4,"Scenario B"  
365,1,1,3,3,1,5,2,2,2,2,1,3,1,3,"Scenario B"  
365,1,1,2,2,3,3,3,2,2,3,1,2,4,5,"Scenario B"  
365,1,2,2,3,1,5,4,2,1,3,2,4,2,5,"Scenario A"

373,2,1,2,2,3,2,1,1,2,3,2,1,5,4,"Scenario A"  
373,1,2,2,3,2,1,5,2,1,1,1,4,3,3,"Scenario B"  
373,2,2,1,1,2,4,5,1,2,2,2,3,1,1,"Scenario B"  
373,1,1,3,3,1,4,1,2,2,1,2,4,3,2,"Scenario B"  
373,2,1,2,1,4,2,3,1,1,3,3,1,5,3,"Scenario B"  
373,2,2,3,1,1,1,1,1,1,1,3,3,3,4,"Scenario B"  
373,1,2,1,2,3,2,4,2,1,2,2,2,5,3,"Scenario A"  
373,2,2,3,3,4,3,5,2,1,2,1,3,5,2,"Scenario B"  
373,1,2,1,1,2,4,5,2,1,3,3,4,2,4,"Scenario B"  
373,1,1,2,2,2,1,1,2,2,3,1,1,1,2,"Scenario B"  
366,1,2,2,2,4,3,2,1,1,1,3,3,4,3,"Scenario A"  
366,2,1,3,1,2,5,4,1,2,1,3,4,2,1,"Scenario A"  
366,1,1,1,3,1,4,5,2,2,2,2,2,3,5,"Scenario B"  
366,2,1,2,2,1,4,1,1,2,2,1,3,1,2,"Scenario A"  
366,1,1,3,2,2,2,3,2,2,3,3,1,2,4,"Scenario B"  
366,2,1,1,1,4,1,2,1,2,3,2,2,5,3,"Scenario B"  
366,2,1,1,2,1,4,4,1,2,3,1,3,3,5,"Scenario B"  
366,2,2,2,3,3,5,4,1,2,2,3,4,4,1,"Scenario A"  
366,1,1,2,1,4,3,5,2,1,1,2,3,5,1,"Scenario A"  
366,1,1,3,1,1,1,2,2,2,3,3,2,4,1,"Scenario B"  
43,2,1,2,3,1,3,1,1,2,1,1,1,2,2,"Scenario A"  
43,1,1,2,1,2,2,3,2,2,3,2,4,1,2,"Scenario A"  
43,2,1,3,2,3,5,5,1,2,1,3,4,4,4,"Scenario B"  
43,1,2,3,3,1,4,3,2,1,1,1,2,1,4,"Scenario A"  
43,1,1,2,1,4,5,5,2,2,1,2,3,4,1,"Scenario B"  
43,2,1,2,3,1,1,3,1,2,2,1,2,3,1,"Scenario B"  
43,1,2,1,2,1,3,4,2,1,3,3,3,5,1,"Scenario B"  
43,2,2,3,2,1,1,5,1,1,2,3,4,2,2,"Scenario A"  
43,2,2,3,1,2,4,2,1,1,1,2,2,2,5,"Scenario B"  
43,2,2,1,1,3,3,4,1,1,2,3,1,3,5,"Scenario A"  
50,1,1,3,3,3,1,2,1,2,1,2,2,3,2,2,5,"Scenario A"  
50,1,2,3,2,1,1,4,2,1,2,3,4,5,3,"Scenario B"  
50,2,2,1,2,3,4,2,1,1,3,1,1,4,5,"Scenario A"  
50,1,2,1,1,3,2,1,2,1,1,2,4,3,1,"Scenario B"  
50,1,2,2,2,2,3,2,2,2,3,1,4,5,1,"Scenario B"  
50,2,1,2,1,2,1,4,1,1,1,3,2,5,2,"Scenario B"  
50,2,1,1,3,1,2,1,1,2,3,2,4,3,4,"Scenario A"  
50,1,1,3,3,1,5,2,2,2,2,1,3,1,3,"Scenario A"  
50,1,1,2,2,3,3,3,2,2,3,1,2,4,5,"Scenario A"  
50,1,2,2,3,1,5,4,2,1,3,2,4,2,5,"Scenario A"  
308,2,1,2,2,3,2,1,1,2,3,2,1,5,4,"Scenario B"  
308,1,2,2,3,2,1,5,2,1,1,1,4,3,3,"Scenario A"  
308,2,2,1,1,2,4,5,1,2,2,2,3,1,1,"Scenario B"  
308,1,1,3,3,1,4,1,2,2,1,2,4,3,2,"Scenario A"  
308,2,1,2,1,4,2,3,1,1,3,3,1,5,3,"Scenario B"  
308,2,2,3,1,1,1,1,1,1,1,3,3,3,4,"Scenario A"  
308,1,2,1,2,3,2,4,2,1,2,2,2,5,3,"Scenario B"  
308,2,2,3,3,4,3,5,2,1,2,1,3,5,2,"Scenario B"  
308,1,2,1,1,2,4,5,2,1,3,3,4,2,4,"Scenario B"  
308,1,1,2,2,2,1,1,2,2,3,1,1,1,2,"Scenario A"  
51,1,2,2,2,4,3,2,1,1,1,3,3,4,3,"Scenario A"  
51,2,1,3,1,2,5,4,1,2,1,3,4,2,1,"Scenario A"  
51,1,1,1,3,1,4,5,2,2,2,2,2,3,5,"Scenario B"  
51,2,1,2,2,1,4,1,1,2,2,1,3,1,2,"Scenario A"  
51,1,1,3,2,2,2,3,2,2,3,3,1,2,4,"Scenario A"  
51,2,1,1,1,4,1,2,1,2,3,2,2,5,3,"Scenario A"  
51,2,1,1,2,1,4,4,1,2,3,1,3,3,5,"Scenario A"

51,2,2,2,3,3,5,4,1,2,2,3,4,4,1,"Scenario B"  
51,1,1,2,1,4,3,5,2,1,1,2,3,5,1,"Scenario B"  
51,1,1,3,1,1,1,2,2,2,3,3,2,4,1,"Scenario B"  
48,2,1,2,3,1,3,1,1,2,1,1,1,2,2,"Scenario A"  
48,1,1,2,1,2,2,3,2,2,3,2,4,1,2,"Scenario B"  
48,2,1,3,2,3,5,5,1,2,1,3,4,4,4,"Scenario B"  
48,1,2,3,3,1,4,3,2,1,1,1,2,1,4,"Scenario A"  
48,1,1,2,1,4,5,5,2,2,1,2,3,4,1,"Scenario B"  
48,2,1,2,3,1,1,3,1,2,2,1,2,3,1,"Scenario B"  
48,1,2,1,2,1,3,4,2,1,3,3,3,5,1,"Scenario B"  
48,2,2,3,2,1,1,5,1,1,2,3,4,2,2,"Scenario B"  
48,2,2,3,1,2,4,2,1,1,1,2,2,2,5,"Scenario A"  
48,2,2,3,1,1,3,3,4,1,1,2,3,1,3,5,"Scenario A"  
49,1,1,3,3,3,1,2,1,2,2,3,2,2,5,"Scenario B"  
49,1,2,3,2,1,1,4,2,1,2,3,4,5,3,"Scenario B"  
49,2,2,1,2,3,4,2,1,1,3,1,1,4,5,"Scenario A"  
49,1,2,1,1,3,2,1,2,1,1,2,4,3,1,"Scenario A"  
49,1,2,2,2,2,3,2,2,2,3,1,4,5,1,"Scenario B"  
49,2,1,2,1,2,1,4,1,1,1,3,2,5,2,"Scenario B"  
49,2,1,1,3,1,2,1,1,2,3,2,4,3,4,"Scenario A"  
49,1,1,3,3,1,5,2,2,2,2,1,3,1,3,"Scenario A"  
49,1,1,2,2,3,3,3,2,2,3,1,2,4,5,"Scenario A"  
49,1,2,2,3,1,5,4,2,1,3,2,4,2,5,"Scenario A"  
42,2,1,2,2,3,2,1,1,2,3,2,1,5,4,"Scenario A"  
42,1,2,2,3,2,1,5,2,1,1,1,4,3,3,"Scenario B"  
42,2,2,1,1,2,4,5,1,2,2,2,3,1,1,"Scenario B"  
42,1,1,3,3,1,4,1,2,2,1,2,4,3,2,"Scenario A"  
42,2,1,2,1,4,2,3,1,1,3,3,1,5,3,"Scenario B"  
42,2,2,3,1,1,1,1,1,1,1,3,3,3,4,"Scenario A"  
42,1,2,1,2,3,2,4,2,1,2,2,2,5,3,"Scenario B"  
42,2,2,3,3,4,3,5,2,1,2,1,3,5,2,"Scenario B"  
42,1,2,1,1,2,4,5,2,1,3,3,4,2,4,"Scenario B"  
42,1,1,2,2,2,1,1,2,2,3,1,1,1,2,"Scenario A"  
46,1,2,2,2,4,3,2,1,1,1,3,3,4,3,"Scenario A"  
46,2,1,3,1,2,5,4,1,2,1,3,4,2,1,"Scenario A"  
46,1,1,1,3,1,4,5,2,2,2,2,2,3,5,"Scenario B"  
46,2,1,2,2,1,4,1,1,2,2,1,3,1,2,"Scenario A"  
46,1,1,3,2,2,2,3,2,2,3,3,1,2,4,"Scenario A"  
46,2,1,1,1,4,1,2,1,2,3,2,2,5,3,"Scenario A"  
46,2,1,1,2,1,4,4,1,2,3,1,3,3,5,"Scenario A"  
46,2,2,2,3,3,5,4,1,2,2,3,4,4,1,"Scenario B"  
46,1,1,2,1,4,3,5,2,1,1,2,3,5,1,"Scenario B"  
46,1,1,3,1,1,1,2,2,2,3,3,2,4,1,"Scenario B"  
47,2,1,2,3,1,3,1,1,2,1,1,1,2,2,"Scenario A"  
47,1,1,2,1,2,2,3,2,2,3,2,4,1,2,"Scenario B"  
47,2,1,3,2,3,5,5,1,2,1,3,4,4,4,"Scenario B"  
47,1,2,3,3,1,4,3,2,1,1,1,2,1,4,"Scenario A"  
47,1,1,2,1,4,5,5,2,2,1,2,3,4,1,"Scenario B"  
47,2,1,2,3,1,1,3,1,2,2,1,2,3,1,"Scenario B"  
47,1,2,1,2,1,3,4,2,1,3,3,3,5,1,"Scenario B"  
47,2,2,3,2,1,1,5,1,1,2,3,4,2,2,"Scenario B"  
47,2,2,3,1,2,4,2,1,1,1,2,2,2,5,"Scenario A"  
47,2,2,1,1,3,3,4,1,1,2,3,1,3,5,"Scenario A"  
45,1,1,3,3,3,1,2,1,2,2,3,2,2,5,"Scenario A"  
45,1,2,3,2,1,1,4,2,1,2,3,4,5,3,"Scenario B"  
45,2,2,1,2,3,4,2,1,1,3,1,1,4,5,"Scenario B"  
45,1,2,1,1,3,2,1,2,1,1,2,4,3,1,"Scenario A"

45,1,2,2,2,2,3,2,2,2,3,1,4,5,1,"Scenario B"  
45,2,1,2,1,2,1,4,1,1,1,3,2,5,2,"Scenario A"  
45,2,1,1,3,1,2,1,1,2,3,2,4,3,4,"Scenario B"  
45,1,1,3,3,1,5,2,2,2,2,1,3,1,3,"Scenario B"  
45,1,1,2,2,3,3,3,2,2,3,1,2,4,5,"Scenario B"  
45,1,2,2,3,1,5,4,2,1,3,2,4,2,5,"Scenario A"  
52,2,1,2,2,3,2,1,1,2,3,2,1,5,4,"Scenario A"  
52,1,2,2,3,2,1,5,2,1,1,1,4,3,3,"Scenario B"  
52,2,2,1,1,2,4,5,1,2,2,2,3,1,1,"Scenario B"  
52,1,1,3,3,1,4,1,2,2,1,2,4,3,2,"Scenario A"  
52,2,1,2,1,4,2,3,1,1,3,3,1,5,3,"Scenario B"  
52,2,2,3,1,1,1,1,1,1,1,3,3,3,4,"Scenario A"  
52,1,2,1,2,3,2,4,2,1,2,2,2,5,3,"Scenario B"  
52,2,2,3,3,4,3,5,2,1,2,1,3,5,2,"Scenario B"  
52,1,2,1,1,2,4,5,2,1,3,3,4,2,4,"Scenario B"  
52,1,1,2,2,2,1,1,2,2,3,1,1,1,2,"Scenario A"  
40,1,2,2,2,4,3,2,1,1,1,3,3,4,3,"Scenario A"  
40,2,1,3,1,2,5,4,1,2,1,3,4,2,1,"Scenario B"  
40,1,1,1,3,1,4,5,2,2,2,2,2,3,5,"Scenario B"  
40,2,1,2,2,1,4,1,1,2,2,1,3,1,2,"Scenario A"  
40,1,1,3,2,2,2,3,2,2,3,3,1,2,4,"Scenario A"  
40,2,1,1,1,4,1,2,1,2,3,2,2,5,3,"Scenario A"  
40,2,1,1,2,1,4,4,1,2,3,1,3,3,5,"Scenario A"  
40,2,2,2,3,3,5,4,1,2,2,3,4,4,1,"Scenario B"  
40,1,1,2,1,4,3,5,2,1,1,2,3,5,1,"Scenario B"  
40,1,1,3,1,1,1,2,2,2,3,3,2,4,1,"Scenario B"  
53,2,1,2,3,1,3,1,1,2,1,1,1,2,2,"Scenario A"  
53,1,1,2,1,2,2,3,2,2,3,2,4,1,2,"Scenario B"  
53,2,1,3,2,3,5,5,1,2,1,3,4,4,4,"Scenario B"  
53,1,2,3,3,1,4,3,2,1,1,1,2,1,4,"Scenario A"  
53,1,1,2,2,1,4,5,5,2,2,1,2,3,4,1,"Scenario B"  
53,2,1,2,3,1,1,3,1,2,2,1,2,3,1,"Scenario A"  
53,1,2,1,2,1,3,4,2,1,3,3,3,5,1,"Scenario B"  
53,2,2,3,2,1,1,5,1,1,2,3,4,2,2,"Scenario B"  
53,2,2,3,1,2,4,2,1,1,1,2,2,2,5,"Scenario A"  
53,2,2,1,1,3,3,4,1,1,2,3,1,3,5,"Scenario B"  
44,1,1,3,3,3,1,2,1,2,2,3,2,2,5,"Scenario B"  
44,1,2,3,2,1,1,4,2,1,2,3,4,5,3,"Scenario A"  
44,2,2,1,2,3,4,2,1,1,3,1,1,4,5,"Scenario B"  
44,1,2,1,1,3,2,1,2,1,1,2,4,3,1,"Scenario B"  
44,1,2,2,2,2,3,2,2,2,3,1,4,5,1,"Scenario A"  
44,2,1,2,1,2,1,4,1,1,1,3,2,5,2,"Scenario B"  
44,2,1,1,3,1,2,1,1,2,3,2,4,3,4,"Scenario A"  
44,1,1,3,3,1,5,2,2,2,2,1,3,1,3,"Scenario A"  
44,1,1,2,2,3,3,3,2,2,3,1,2,4,5,"Scenario B"  
44,1,2,2,3,1,5,4,2,1,3,2,4,2,5,"Scenario A"  
41,2,1,2,2,3,2,1,1,2,3,2,1,5,4,"Scenario A"  
41,1,2,2,3,2,1,5,2,1,1,1,4,3,3,"Scenario B"  
41,2,2,1,1,2,4,5,1,2,2,2,3,1,1,"Scenario B"  
41,1,1,3,3,1,4,1,2,2,1,2,4,3,2,"Scenario A"  
41,2,1,2,1,4,2,3,1,1,3,3,1,5,3,"Scenario B"  
41,2,2,3,1,1,1,1,1,1,1,3,3,3,4,"Scenario A"  
41,1,2,1,2,3,2,4,2,1,2,2,2,5,3,"Scenario B"  
41,2,2,3,3,4,3,5,2,1,2,1,3,5,2,"Scenario B"  
41,1,2,1,1,2,4,5,2,1,3,3,4,2,4,"Scenario B"  
41,1,1,2,2,2,1,1,2,2,3,1,1,1,2,"Scenario A"  
58,1,2,2,2,4,3,2,1,1,1,3,3,4,3,"Scenario A"

58,2,1,3,1,2,5,4,1,2,1,3,4,2,1,"Scenario B"  
58,1,1,1,3,1,4,5,2,2,2,2,2,3,5,"Scenario B"  
58,2,1,2,2,1,4,1,1,2,2,1,3,1,2,"Scenario B"  
58,1,1,3,2,2,2,3,2,2,3,3,1,2,4,"Scenario B"  
58,2,1,1,1,4,1,2,1,2,3,2,2,5,3,"Scenario B"  
58,2,1,1,2,1,4,4,1,2,3,1,3,3,5,"Scenario B"  
58,2,2,2,3,3,5,4,1,2,2,3,4,4,1,"Scenario A"  
58,1,1,2,1,4,3,5,2,1,1,2,3,5,1,"Scenario A"  
58,1,1,3,1,1,1,2,2,2,3,3,2,4,1,"Scenario B"  
12,2,1,2,3,1,3,1,1,2,1,1,1,2,2,"Scenario A"  
12,1,1,2,1,2,2,3,2,2,3,2,4,1,2,"Scenario A"  
12,2,1,3,2,3,5,5,1,2,1,3,4,4,4,"Scenario A"  
12,1,2,3,3,1,4,3,2,1,1,1,2,1,4,"Scenario A"  
12,1,1,2,1,4,5,5,2,2,1,2,3,4,1,"Scenario B"  
12,2,1,2,3,1,1,3,1,2,2,1,2,3,1,"Scenario A"  
12,1,2,1,2,1,3,4,2,1,3,3,3,5,1,"Scenario A"  
12,2,2,3,2,1,1,5,1,1,2,3,4,2,2,"Scenario A"  
12,2,2,3,1,2,4,2,1,1,1,2,2,2,5,"Scenario B"  
12,2,2,1,1,3,3,4,1,1,2,3,1,3,5,"Scenario B"  
54,1,1,3,3,3,1,2,1,2,2,3,2,2,5,"Scenario B"  
54,1,2,3,2,1,1,4,2,1,2,3,4,5,3,"Scenario A"  
54,2,2,1,2,3,4,2,1,1,3,1,1,4,5,"Scenario B"  
54,1,2,1,1,3,2,1,2,1,1,2,4,3,1,"Scenario A"  
54,1,2,2,2,2,3,2,2,2,3,1,4,5,1,"Scenario B"  
54,2,1,2,1,2,1,4,1,1,1,3,2,5,2,"Scenario B"  
54,2,1,1,3,1,2,1,1,2,3,2,4,3,4,"Scenario A"  
54,1,1,3,3,1,5,2,2,2,2,1,3,1,3,"Scenario A"  
54,1,1,2,2,3,3,3,2,2,3,1,2,4,5,"Scenario B"  
54,1,2,2,3,1,5,4,2,1,3,2,4,2,5,"Scenario A"  
56,2,1,2,2,3,2,1,1,2,3,2,1,5,4,"Scenario A"  
56,1,2,2,3,2,1,5,2,1,1,1,4,3,3,"Scenario B"  
56,2,2,1,1,2,4,5,1,2,2,2,3,1,1,"Scenario B"  
56,1,1,3,3,1,4,1,2,2,1,2,4,3,2,"Scenario A"  
56,2,1,2,1,4,2,3,1,1,3,3,1,5,3,"Scenario B"  
56,2,2,3,1,1,1,1,1,1,1,3,3,3,4,"Scenario A"  
56,1,2,1,2,3,2,4,2,1,2,2,2,5,3,"Scenario B"  
56,2,2,3,3,4,3,5,2,1,2,1,3,5,2,"Scenario B"  
56,1,2,1,1,2,4,5,2,1,3,3,4,2,4,"Scenario B"  
56,1,1,2,2,2,1,1,2,2,3,1,1,1,2,"Scenario A"  
11,1,2,2,2,4,3,2,1,1,1,3,3,4,3,"Scenario A"  
11,2,1,3,1,2,5,4,1,2,1,3,4,2,1,"Scenario B"  
11,1,1,1,3,1,4,5,2,2,2,2,2,3,5,"Scenario B"  
11,2,1,2,2,1,4,1,1,2,2,1,3,1,2,"Scenario B"  
11,1,1,3,2,2,2,3,2,2,3,3,1,2,4,"Scenario B"  
11,2,1,1,1,4,1,2,1,2,3,2,2,5,3,"Scenario B"  
11,2,1,1,2,1,4,4,1,2,3,1,3,3,5,"Scenario B"  
11,2,2,2,3,3,5,4,1,2,2,3,4,4,1,"Scenario A"  
11,1,1,2,1,4,3,5,2,1,1,2,3,5,1,"Scenario B"  
11,1,1,3,1,1,1,1,2,2,2,3,3,2,4,1,"Scenario B"  
483,2,1,2,3,1,3,1,1,2,1,1,1,2,2,"Scenario B"  
483,1,1,2,1,2,2,3,2,2,3,2,4,1,2,"Scenario B"  
483,2,1,3,2,3,5,5,1,2,1,3,4,4,4,"Scenario B"  
483,1,2,3,3,1,4,3,2,1,1,1,2,1,4,"Scenario A"  
483,1,1,2,1,4,5,5,2,2,1,2,3,4,1,"Scenario B"  
483,2,1,2,3,1,1,3,1,2,2,1,2,3,1,"Scenario B"  
483,1,2,1,2,1,3,4,2,1,3,3,3,5,1,"Scenario A"  
483,2,2,3,2,1,1,5,1,1,2,3,4,2,2,"Scenario A"

483,2,2,3,1,2,4,2,1,1,1,2,2,2,5,"Scenario A"  
483,2,2,1,1,3,3,4,1,1,2,3,1,3,5,"Scenario A"  
482,1,1,3,3,3,1,2,1,2,2,3,2,2,5,"Scenario A"  
482,1,2,3,2,1,1,4,2,1,2,3,4,5,3,"Scenario A"  
482,2,2,1,2,3,4,2,1,1,3,1,1,4,5,"Scenario A"  
482,1,2,1,1,3,2,1,2,1,1,2,4,3,1,"Scenario B"  
482,1,2,2,2,2,3,2,2,2,3,1,4,5,1,"Scenario B"  
482,2,1,2,1,2,1,4,1,1,1,3,2,5,2,"Scenario A"  
482,2,1,1,3,1,2,1,1,2,3,2,4,3,4,"Scenario A"  
482,1,1,3,3,1,5,2,2,2,2,1,3,1,3,"Scenario B"  
482,1,1,2,2,3,3,3,2,2,3,1,2,4,5,"Scenario B"  
482,1,2,2,3,1,5,4,2,1,3,2,4,2,5,"Scenario A"  
485,2,1,2,2,3,2,1,1,2,3,2,1,5,4,"Scenario B"  
485,1,2,2,3,2,1,5,2,1,1,1,4,3,3,"Scenario A"  
485,2,2,1,1,2,4,5,1,2,2,2,3,1,1,"Scenario B"  
485,1,1,3,3,1,4,1,2,2,1,2,4,3,2,"Scenario B"  
485,2,1,2,1,4,2,3,1,1,3,3,1,5,3,"Scenario B"  
485,2,2,3,1,1,1,1,1,1,1,3,3,3,4,"Scenario B"  
485,1,2,1,2,3,2,4,2,1,2,2,2,5,3,"Scenario B"  
485,2,2,3,3,4,3,5,2,1,2,1,3,5,2,"Scenario A"  
485,1,2,1,1,2,4,5,2,1,3,3,4,2,4,"Scenario B"  
485,1,1,2,2,2,1,1,2,2,3,1,1,1,2,"Scenario A"  
480,1,2,2,2,4,3,2,1,1,1,3,3,4,3,"Scenario A"  
480,2,1,3,1,2,5,4,1,2,1,3,4,2,1,"Scenario A"  
480,1,1,1,3,1,4,5,2,2,2,2,2,3,5,"Scenario B"  
480,2,1,2,2,1,4,1,1,2,2,1,3,1,2,"Scenario A"  
480,1,1,3,2,2,2,3,2,2,3,3,1,2,4,"Scenario B"  
480,2,1,1,1,4,1,2,1,2,3,2,2,5,3,"Scenario A"  
480,2,1,1,2,1,4,4,1,2,3,1,3,3,5,"Scenario B"  
480,2,2,2,3,3,5,4,1,2,2,3,4,4,1,"Scenario A"  
480,1,1,2,1,4,3,5,2,1,1,2,3,5,1,"Scenario A"  
480,1,1,3,1,1,1,2,2,2,3,3,2,4,1,"Scenario A"  
479,2,1,2,3,1,3,1,1,2,1,1,1,2,2,"Scenario A"  
479,1,1,2,1,2,2,3,2,2,3,2,4,1,2,"Scenario B"  
479,2,1,3,2,3,5,5,1,2,1,3,4,4,4,"Scenario A"  
479,1,2,3,3,1,4,3,2,1,1,1,2,1,4,"Scenario A"  
479,1,1,2,1,4,5,5,2,2,1,2,3,4,1,"Scenario B"  
479,2,1,2,3,1,1,3,1,2,2,1,2,3,1,"Scenario B"  
479,1,2,1,2,1,3,4,2,1,3,3,3,5,1,"Scenario B"  
479,2,2,3,2,1,1,5,1,1,2,3,4,2,2,"Scenario A"  
479,2,2,3,1,2,4,2,1,1,1,2,2,2,5,"Scenario A"  
479,2,2,1,1,3,3,4,1,1,2,3,1,3,5,"Scenario A"  
69,1,1,3,3,3,1,2,1,2,2,3,2,2,5,"Scenario A"  
69,1,2,3,2,1,1,4,2,1,2,3,4,5,3,"Scenario A"  
69,2,2,1,2,3,4,2,1,1,3,1,1,4,5,"Scenario B"  
69,1,2,1,1,3,2,1,2,1,1,2,4,3,1,"Scenario B"  
69,1,2,2,2,2,3,2,2,2,3,1,4,5,1,"Scenario A"  
69,2,1,2,1,2,1,4,1,1,1,3,2,5,2,"Scenario B"  
69,2,1,1,3,1,2,1,1,2,3,2,4,3,4,"Scenario A"  
69,1,1,3,3,1,5,2,2,2,2,1,3,1,3,"Scenario A"  
69,1,1,2,2,3,3,3,2,2,3,1,2,4,5,"Scenario A"  
69,1,2,2,3,1,5,4,2,1,3,2,4,2,5,"Scenario A"  
57,2,1,2,2,3,2,1,1,2,3,2,1,5,4,"Scenario B"  
57,1,2,2,3,2,1,5,2,1,1,1,4,3,3,"Scenario A"  
57,2,2,1,1,2,4,5,1,2,2,2,3,1,1,"Scenario A"  
57,1,1,3,3,1,4,1,2,2,1,2,4,3,2,"Scenario A"  
57,2,1,2,1,4,2,3,1,1,3,3,1,5,3,"Scenario B"

57,2,2,3,1,1,1,1,1,1,1,3,3,3,4,"Scenario A"  
57,1,2,1,2,3,2,4,2,1,2,2,2,5,3,"Scenario B"  
57,2,2,3,3,4,3,5,2,1,2,1,3,5,2,"Scenario B"  
57,1,2,1,1,2,4,5,2,1,3,3,4,2,4,"Scenario A"  
57,1,1,2,2,2,1,1,2,2,3,1,1,1,2,"Scenario B"  
55,1,2,2,2,4,3,2,1,1,1,3,3,4,3,"Scenario A"  
55,2,1,3,1,2,5,4,1,2,1,3,4,2,1,"Scenario A"  
55,1,1,1,3,1,4,5,2,2,2,2,2,3,5,"Scenario A"  
55,2,1,2,2,1,4,1,1,2,2,1,3,1,2,"Scenario A"  
55,1,1,3,2,2,2,3,2,2,3,3,1,2,4,"Scenario B"  
55,2,1,1,1,4,1,2,1,2,3,2,2,5,3,"Scenario B"  
55,2,1,1,2,1,4,4,1,2,3,1,3,3,5,"Scenario B"  
55,2,2,2,3,3,5,4,1,2,2,3,4,4,1,"Scenario A"  
55,1,1,2,1,4,3,5,2,1,1,2,3,5,1,"Scenario B"  
55,1,1,3,1,1,1,2,2,2,3,3,2,4,1,"Scenario A"  
13,2,1,2,3,1,3,1,1,2,1,1,1,2,2,"Scenario A"  
13,1,1,2,1,2,2,3,2,2,3,2,4,1,2,"Scenario B"  
13,2,1,3,2,3,5,5,1,2,1,3,4,4,4,"Scenario B"  
13,1,2,3,3,1,4,3,2,1,1,1,2,1,4,"Scenario A"  
13,1,1,2,1,4,5,5,2,2,1,2,3,4,1,"Scenario B"  
13,2,1,2,3,1,1,3,1,2,2,1,2,3,1,"Scenario B"  
13,1,2,1,2,1,3,4,2,1,3,3,3,5,1,"Scenario B"  
13,2,2,3,2,1,1,5,1,1,2,3,4,2,2,"Scenario B"  
13,2,2,3,1,2,4,2,1,1,1,2,2,2,5,"Scenario A"  
13,2,2,1,1,3,3,4,1,1,2,3,1,3,5,"Scenario A"  
59,1,1,3,3,3,1,2,1,2,2,3,2,2,5,"Scenario B"  
59,1,2,3,2,1,1,4,2,1,2,3,4,5,3,"Scenario A"  
59,2,2,1,2,3,4,2,1,1,3,1,1,4,5,"Scenario A"  
59,1,2,1,1,3,2,1,2,1,1,2,4,3,1,"Scenario A"  
59,1,2,2,2,2,3,2,2,2,3,1,4,5,1,"Scenario A"  
59,2,1,2,1,2,1,4,1,1,1,3,2,5,2,"Scenario A"  
59,2,1,1,3,1,2,1,1,2,3,2,4,3,4,"Scenario B"  
59,1,1,3,3,1,5,2,2,2,2,1,3,1,3,"Scenario A"  
59,1,1,2,2,3,3,3,2,2,3,1,2,4,5,"Scenario B"  
59,1,2,2,3,1,5,4,2,1,3,2,4,2,5,"Scenario A"  
70,2,1,2,2,3,2,1,1,2,3,2,1,5,4,"Scenario A"  
70,1,2,2,3,2,1,5,2,1,1,1,4,3,3,"Scenario B"  
70,2,2,1,1,2,4,5,1,2,2,2,3,1,1,"Scenario B"  
70,1,1,3,3,1,4,1,2,2,1,2,4,3,2,"Scenario B"  
70,2,1,2,1,4,2,3,1,1,3,3,1,5,3,"Scenario A"  
70,2,2,3,1,1,1,1,1,1,1,3,3,3,4,"Scenario A"  
70,1,2,1,2,3,2,4,2,1,2,2,2,5,3,"Scenario B"  
70,2,2,3,3,4,3,5,2,1,2,1,3,5,2,"Scenario A"  
70,1,2,1,1,2,4,5,2,1,3,3,4,2,4,"Scenario B"  
70,1,1,2,2,2,1,1,2,2,3,1,1,1,2,"Scenario A"  
71,1,2,2,2,4,3,2,1,1,1,3,3,4,3,"Scenario B"  
71,2,1,3,1,2,5,4,1,2,1,3,4,2,1,"Scenario A"  
71,1,1,1,3,1,4,5,2,2,2,2,2,3,5,"Scenario A"  
71,2,1,2,2,1,4,1,1,2,2,1,3,1,2,"Scenario A"  
71,1,1,3,2,2,2,3,2,2,3,3,1,2,4,"Scenario B"  
71,2,1,1,1,4,1,2,1,2,3,2,2,5,3,"Scenario B"  
71,2,1,1,2,1,4,4,1,2,3,1,3,3,5,"Scenario A"  
71,2,2,2,3,3,5,4,1,2,2,3,4,4,1,"Scenario A"  
71,1,1,2,1,4,3,5,2,1,1,2,3,5,1,"Scenario B"  
71,1,1,3,1,1,1,2,2,2,3,3,2,4,1,"Scenario A"  
73,2,1,2,3,1,3,1,1,2,1,1,1,2,2,"Scenario A"  
73,1,1,2,1,2,2,3,2,2,3,2,4,1,2,"Scenario B"



73,2,1,3,2,3,5,5,1,2,1,3,4,4,4,"Scenario A"  
73,1,2,3,3,1,4,3,2,1,1,1,2,1,4,"Scenario A"  
73,1,1,2,1,4,5,5,2,2,1,2,3,4,1,"Scenario B"  
73,2,1,2,3,1,1,3,1,2,2,1,2,3,1,"Scenario A"  
73,1,2,1,2,1,3,4,2,1,3,3,3,5,1,"Scenario A"  
73,2,2,3,2,1,1,5,1,1,2,3,4,2,2,"Scenario B"  
73,2,2,3,1,2,4,2,1,1,1,2,2,2,5,"Scenario A"  
73,2,2,1,1,3,3,4,1,1,2,3,1,3,5,"Scenario B"  
74,1,1,3,3,3,1,2,1,2,2,3,2,2,5,"Scenario A"  
74,1,2,3,2,1,1,4,2,1,2,3,4,5,3,"Scenario A"  
74,2,2,1,2,3,4,2,1,1,3,1,1,4,5,"Scenario B"  
74,1,2,1,1,3,2,1,2,1,1,2,4,3,1,"Scenario A"  
74,1,2,2,2,2,3,2,2,2,3,1,4,5,1,"Scenario A"  
74,2,1,2,1,2,1,4,1,1,1,3,2,5,2,"Scenario B"  
74,2,1,1,3,1,2,1,1,2,3,2,4,3,4,"Scenario A"  
74,1,1,3,3,1,5,2,2,2,2,1,3,1,3,"Scenario A"  
74,1,1,2,2,3,3,3,2,2,3,1,2,4,5,"Scenario A"  
74,1,2,2,3,1,5,4,2,1,3,2,4,2,5,"Scenario A"  
190,2,1,2,2,3,2,1,1,2,3,2,1,5,4,"Scenario A"  
190,1,2,2,3,2,1,5,2,1,1,1,4,3,3,"Scenario A"  
190,2,2,1,1,2,4,5,1,2,2,2,3,1,1,"Scenario B"  
190,1,1,3,3,1,4,1,2,2,1,2,4,3,2,"Scenario B"  
190,2,1,2,1,4,2,3,1,1,3,3,1,5,3,"Scenario A"  
190,2,2,3,1,1,1,1,1,1,1,3,3,3,4,"Scenario A"  
190,1,2,1,2,3,2,4,2,1,2,2,2,5,3,"Scenario A"  
190,2,2,3,3,4,3,5,2,1,2,1,3,5,2,"Scenario A"  
190,1,2,1,1,2,4,5,2,1,3,3,4,2,4,"Scenario B"  
190,1,1,2,2,2,1,1,2,2,3,1,1,1,2,"Scenario A"  
75,1,2,2,2,4,3,2,1,1,1,3,3,4,3,"Scenario A"  
75,2,1,3,1,2,5,4,1,2,1,3,4,2,1,"Scenario B"  
75,1,1,1,3,1,4,5,2,2,2,2,2,3,5,"Scenario B"  
75,2,1,2,2,1,4,1,1,2,2,1,3,1,2,"Scenario B"  
75,1,1,3,2,2,2,3,2,2,3,3,1,2,4,"Scenario B"  
75,2,1,1,1,4,1,2,1,2,3,2,2,5,3,"Scenario B"  
75,2,1,1,2,1,4,4,1,2,3,1,3,3,5,"Scenario B"  
75,2,2,2,3,3,5,4,1,2,2,3,4,4,1,"Scenario A"  
75,1,1,2,1,4,3,5,2,1,1,2,3,5,1,"Scenario A"  
75,1,1,3,1,1,1,2,2,2,3,3,2,4,1,"Scenario B"  
76,2,1,2,3,1,3,1,1,2,1,1,1,2,2,"Scenario A"  
76,1,1,2,1,2,2,3,2,2,3,2,4,1,2,"Scenario B"  
76,2,1,3,2,3,5,5,1,2,1,3,4,4,4,"Scenario A"  
76,1,2,3,3,1,4,3,2,1,1,1,2,1,4,"Scenario B"  
76,1,1,2,1,4,5,5,2,2,1,2,3,4,1,"Scenario B"  
76,2,1,2,3,1,1,3,1,2,2,1,2,3,1,"Scenario B"  
76,1,2,1,2,1,3,4,2,1,3,3,3,5,1,"Scenario B"  
76,2,2,3,2,1,1,5,1,1,2,3,4,2,2,"Scenario B"  
76,2,2,3,1,2,4,2,1,1,1,2,2,2,5,"Scenario A"  
76,2,2,1,1,3,3,4,1,1,2,3,1,3,5,"Scenario A"  
77,1,1,3,3,3,1,2,1,2,2,3,2,2,5,"Scenario A"  
77,1,2,3,2,1,1,4,2,1,2,3,4,5,3,"Scenario A"  
77,2,2,1,2,3,4,2,1,1,3,1,1,4,5,"Scenario A"  
77,1,2,1,1,3,2,1,2,1,1,2,4,3,1,"Scenario A"  
77,1,2,2,2,2,3,2,2,2,3,1,4,5,1,"Scenario B"  
77,2,1,2,1,2,1,4,1,1,1,3,2,5,2,"Scenario B"  
77,2,1,1,3,1,2,1,1,2,3,2,4,3,4,"Scenario A"  
77,1,1,3,3,1,5,2,2,2,2,1,3,1,3,"Scenario B"  
77,1,1,2,2,3,3,3,2,2,3,1,2,4,5,"Scenario A"

77,1,2,2,3,1,5,4,2,1,3,2,4,2,5,"Scenario A"  
78,2,1,2,2,3,2,1,1,2,3,2,1,5,4,"Scenario B"  
78,1,2,2,3,2,1,5,2,1,1,1,4,3,3,"Scenario A"  
78,2,2,1,1,2,4,5,1,2,2,2,3,1,1,"Scenario B"  
78,1,1,3,3,1,4,1,2,2,1,2,4,3,2,"Scenario A"  
78,2,1,2,1,4,2,3,1,1,3,3,1,5,3,"Scenario B"  
78,2,2,3,1,1,1,1,1,1,1,3,3,3,4,"Scenario A"  
78,1,2,1,2,3,2,4,2,1,2,2,2,5,3,"Scenario A"  
78,2,2,3,3,4,3,5,2,1,2,1,3,5,2,"Scenario B"  
78,1,2,1,1,2,4,5,2,1,3,3,4,2,4,"Scenario B"  
78,1,1,2,2,2,1,1,2,2,3,1,1,1,2,"Scenario A"  
189,1,2,2,2,4,3,2,1,1,1,3,3,4,3,"Scenario A"  
189,2,1,3,1,2,5,4,1,2,1,3,4,2,1,"Scenario A"  
189,1,1,1,3,1,4,5,2,2,2,2,2,3,5,"Scenario B"  
189,2,1,2,2,1,4,1,1,2,2,1,3,1,2,"Scenario A"  
189,1,1,3,2,2,2,3,2,2,3,3,1,2,4,"Scenario B"  
189,2,1,1,1,4,1,2,1,2,3,2,2,5,3,"Scenario B"  
189,2,1,1,2,1,4,4,1,2,3,1,3,3,5,"Scenario A"  
189,2,2,2,3,3,5,4,1,2,2,3,4,4,1,"Scenario A"  
189,1,1,2,1,4,3,5,2,1,1,2,3,5,1,"Scenario B"  
189,1,1,3,1,1,1,2,2,2,3,3,2,4,1,"Scenario A"  
72,2,1,2,3,1,3,1,1,2,1,1,1,2,2,"Scenario A"  
72,1,1,2,1,2,2,3,2,2,3,2,4,1,2,"Scenario A"  
72,2,1,3,2,3,5,5,1,2,1,3,4,4,4,"Scenario A"  
72,1,2,3,3,1,4,3,2,1,1,1,2,1,4,"Scenario A"  
72,1,1,2,1,4,5,5,2,2,1,2,3,4,1,"Scenario B"  
72,2,1,2,3,1,1,3,1,2,2,1,2,3,1,"Scenario A"  
72,1,2,1,2,1,3,4,2,1,3,3,3,5,1,"Scenario A"  
72,2,2,3,2,1,1,5,1,1,2,3,4,2,2,"Scenario A"  
72,2,2,3,1,2,4,2,1,1,1,2,2,2,5,"Scenario A"  
72,2,2,1,1,3,3,4,1,1,2,3,1,3,5,"Scenario B"  
95,1,1,3,3,3,1,2,1,2,2,3,2,2,5,"Scenario A"  
95,1,2,3,2,1,1,4,2,1,2,3,4,5,3,"Scenario B"  
95,2,2,1,2,3,4,2,1,1,3,1,1,4,5,"Scenario B"  
95,1,2,1,1,3,2,1,2,1,1,2,4,3,1,"Scenario B"  
95,1,2,2,2,2,3,2,2,2,3,1,4,5,1,"Scenario B"  
95,2,1,2,1,2,1,4,1,1,1,3,2,5,2,"Scenario A"  
95,2,1,1,3,1,2,1,1,2,3,2,4,3,4,"Scenario A"  
95,1,1,3,3,1,5,2,2,2,2,1,3,1,3,"Scenario A"  
95,1,1,2,2,3,3,3,2,2,3,1,2,4,5,"Scenario B"  
95,1,2,2,3,1,5,4,2,1,3,2,4,2,5,"Scenario B"  
191,2,1,2,2,3,2,1,1,2,3,2,1,5,4,"Scenario B"  
191,1,2,2,3,2,1,5,2,1,1,1,4,3,3,"Scenario A"  
191,2,2,1,1,2,4,5,1,2,2,2,3,1,1,"Scenario B"  
191,1,1,3,3,1,4,1,2,2,1,2,4,3,2,"Scenario A"  
191,2,1,2,1,4,2,3,1,1,3,3,1,5,3,"Scenario B"  
191,2,2,3,1,1,1,1,1,1,1,3,3,3,4,"Scenario A"  
191,1,2,1,2,3,2,4,2,1,2,2,2,5,3,"Scenario A"  
191,2,2,3,3,4,3,5,2,1,2,1,3,5,2,"Scenario A"  
191,1,2,1,1,2,4,5,2,1,3,3,4,2,4,"Scenario A"  
191,1,1,2,2,2,1,1,2,2,3,1,1,1,2,"Scenario B"  
79,1,2,2,2,4,3,2,1,1,1,3,3,4,3,"Scenario A"  
79,2,1,3,1,2,5,4,1,2,1,3,4,2,1,"Scenario B"  
79,1,1,1,3,1,4,5,2,2,2,2,2,3,5,"Scenario A"  
79,2,1,2,2,1,4,1,1,2,2,1,3,1,2,"Scenario A"  
79,1,1,3,2,2,2,3,2,2,3,3,1,2,4,"Scenario A"  
79,2,1,1,1,4,1,2,1,2,3,2,2,5,3,"Scenario A"

79,2,1,1,2,1,4,4,1,2,3,1,3,3,5,"Scenario A"  
79,2,2,2,3,3,5,4,1,2,2,3,4,4,1,"Scenario B"  
79,1,1,2,1,4,3,5,2,1,1,2,3,5,1,"Scenario B"  
79,1,1,3,1,1,1,2,2,2,3,3,2,4,1,"Scenario B"  
80,2,1,2,3,1,3,1,1,2,1,1,1,2,2,"Scenario A"  
80,1,1,2,1,2,2,3,2,2,3,2,4,1,2,"Scenario B"  
80,2,1,3,2,3,5,5,1,2,1,3,4,4,4,"Scenario B"  
80,1,2,3,3,1,4,3,2,1,1,1,2,1,4,"Scenario A"  
80,1,1,2,1,4,5,5,2,2,1,2,3,4,1,"Scenario B"  
80,2,1,2,3,1,1,3,1,2,2,1,2,3,1,"Scenario B"  
80,1,2,1,2,1,3,4,2,1,3,3,3,5,1,"Scenario B"  
80,2,2,3,2,1,1,5,1,1,2,3,4,2,2,"Scenario B"  
80,2,2,3,1,2,4,2,1,1,1,2,2,2,5,"Scenario A"  
80,2,2,1,1,3,3,4,1,1,2,3,1,3,5,"Scenario A"  
417,1,1,3,3,3,1,2,1,2,2,3,2,2,5,"Scenario A"  
417,1,2,3,2,1,1,4,2,1,2,3,4,5,3,"Scenario A"  
417,2,2,1,2,3,4,2,1,1,3,1,1,4,5,"Scenario A"  
417,1,2,1,1,3,2,1,2,1,1,2,4,3,1,"Scenario A"  
417,1,2,2,2,2,3,2,2,2,3,1,4,5,1,"Scenario B"  
417,2,1,2,1,2,1,4,1,1,1,3,2,5,2,"Scenario B"  
417,2,1,1,3,1,2,1,1,2,3,2,4,3,4,"Scenario A"  
417,1,1,3,3,1,5,2,2,2,2,1,3,1,3,"Scenario A"  
417,1,1,2,2,3,3,3,2,2,3,1,2,4,5,"Scenario A"  
417,1,2,2,3,1,5,4,2,1,3,2,4,2,5,"Scenario A"  
416,2,1,2,2,3,2,1,1,2,3,2,1,5,4,"Scenario A"  
416,1,2,2,3,2,1,5,2,1,1,1,4,3,3,"Scenario B"  
416,2,2,1,1,2,4,5,1,2,2,2,3,1,1,"Scenario B"  
416,1,1,3,3,1,4,1,2,2,1,2,4,3,2,"Scenario A"  
416,2,1,2,1,4,2,3,1,1,3,3,1,5,3,"Scenario A"  
416,2,2,3,1,1,1,1,1,1,1,3,3,3,4,"Scenario A"  
416,1,2,1,2,3,2,4,2,1,2,2,2,5,3,"Scenario B"  
416,2,2,3,3,4,3,5,2,1,2,1,3,5,2,"Scenario B"  
416,1,2,1,1,2,4,5,2,1,3,3,4,2,4,"Scenario A"  
416,1,1,2,2,2,1,1,2,2,3,1,1,1,2,"Scenario A"  
381,1,2,2,2,4,3,2,1,1,1,3,3,4,3,"Scenario A"  
381,2,1,3,1,2,5,4,1,2,1,3,4,2,1,"Scenario A"  
381,1,1,1,3,1,4,5,2,2,2,2,2,3,5,"Scenario A"  
381,2,1,2,2,1,4,1,1,2,2,1,3,1,2,"Scenario A"  
381,1,1,3,2,2,2,3,2,2,3,3,1,2,4,"Scenario A"  
381,2,1,1,1,4,1,2,1,2,3,2,2,5,3,"Scenario B"  
381,2,1,1,2,1,4,4,1,2,3,1,3,3,5,"Scenario A"  
381,2,2,2,3,3,5,4,1,2,2,3,4,4,1,"Scenario A"  
381,1,1,2,1,4,3,5,2,1,1,2,3,5,1,"Scenario B"  
381,1,1,3,1,1,1,2,2,2,3,3,2,4,1,"Scenario A"  
390,2,1,2,3,1,3,1,1,2,1,1,1,2,2,"Scenario B"  
390,1,1,2,1,2,2,3,2,2,3,2,4,1,2,"Scenario A"  
390,2,1,3,2,3,5,5,1,2,1,3,4,4,4,"Scenario A"  
390,1,2,3,3,1,4,3,2,1,1,1,2,1,4,"Scenario A"  
390,1,1,2,1,4,5,5,2,2,1,2,3,4,1,"Scenario B"  
390,2,1,2,3,1,1,3,1,2,2,1,2,3,1,"Scenario A"  
390,1,2,1,2,1,3,4,2,1,3,3,3,5,1,"Scenario A"  
390,2,2,3,2,1,1,5,1,1,2,3,4,2,2,"Scenario A"  
390,2,2,3,1,2,4,2,1,1,1,2,2,2,5,"Scenario B"  
390,2,2,1,1,3,3,4,1,1,2,3,1,3,5,"Scenario B"  
391,1,1,3,3,3,1,2,1,2,2,3,2,2,5,"Scenario B"  
391,1,2,3,2,1,1,4,2,1,2,3,4,5,3,"Scenario A"  
391,2,2,1,2,3,4,2,1,1,3,1,1,4,5,"Scenario B"

391,1,2,1,1,3,2,1,2,1,1,2,4,3,1,"Scenario A"  
391,1,2,2,2,2,3,2,2,2,3,1,4,5,1,"Scenario A"  
391,2,1,2,1,2,1,4,1,1,1,3,2,5,2,"Scenario A"  
391,2,1,1,3,1,2,1,1,2,3,2,4,3,4,"Scenario A"  
391,1,1,3,3,1,5,2,2,2,2,1,3,1,3,"Scenario A"  
391,1,1,2,2,3,3,3,2,2,3,1,2,4,5,"Scenario A"  
391,1,2,2,3,1,5,4,2,1,3,2,4,2,5,"Scenario A"  
389,2,1,2,2,3,2,1,1,2,3,2,1,5,4,"Scenario A"  
389,1,2,2,3,2,1,5,2,1,1,1,4,3,3,"Scenario A"  
389,2,2,1,1,2,4,5,1,2,2,2,3,1,1,"Scenario A"  
389,1,1,3,3,1,4,1,2,2,1,2,4,3,2,"Scenario A"  
389,2,1,2,1,4,2,3,1,1,3,3,1,5,3,"Scenario A"  
389,2,2,3,1,1,1,1,1,1,1,3,3,3,4,"Scenario A"  
389,1,2,1,2,3,2,4,2,1,2,2,2,5,3,"Scenario A"  
389,2,2,3,3,4,3,5,2,1,2,1,3,5,2,"Scenario B"  
389,1,2,1,1,2,4,5,2,1,3,3,4,2,4,"Scenario B"  
389,1,1,2,2,2,1,1,2,2,3,1,1,1,2,"Scenario A"  
380,1,2,2,2,4,3,2,1,1,1,3,3,4,3,"Scenario A"  
380,2,1,3,1,2,5,4,1,2,1,3,4,2,1,"Scenario A"  
380,1,1,1,3,1,4,5,2,2,2,2,2,3,5,"Scenario A"  
380,2,1,2,2,1,4,1,1,2,2,1,3,1,2,"Scenario A"  
380,1,1,3,2,2,2,3,2,2,3,3,1,2,4,"Scenario A"  
380,2,1,1,1,4,1,2,1,2,3,2,2,5,3,"Scenario B"  
380,2,1,1,2,1,4,4,1,2,3,1,3,3,5,"Scenario A"  
380,2,2,2,3,3,5,4,1,2,2,3,4,4,1,"Scenario A"  
380,1,1,2,1,4,3,5,2,1,1,2,3,5,1,"Scenario B"  
380,1,1,3,1,1,1,2,2,2,3,3,2,4,1,"Scenario A"  
382,2,1,2,3,1,3,1,1,2,1,1,1,2,2,"Scenario B"  
382,1,1,2,1,2,2,3,2,2,3,2,4,1,2,"Scenario A"  
382,2,1,3,2,3,5,5,1,2,1,3,4,4,4,"Scenario A"  
382,1,2,3,3,1,4,3,2,1,1,1,2,1,4,"Scenario A"  
382,1,1,2,1,4,5,5,2,2,1,2,3,4,1,"Scenario B"  
382,2,1,2,3,1,1,3,1,2,2,1,2,3,1,"Scenario A"  
382,1,2,1,2,1,3,4,2,1,3,3,3,5,1,"Scenario A"  
382,2,2,3,2,1,1,5,1,1,2,3,4,2,2,"Scenario A"  
382,2,2,3,1,2,4,2,1,1,1,2,2,2,5,"Scenario B"  
382,2,2,1,1,3,3,4,1,1,2,3,1,3,5,"Scenario B"  
383,1,1,3,3,3,1,2,1,2,2,3,2,2,5,"Scenario B"  
383,1,2,3,2,1,1,4,2,1,2,3,4,5,3,"Scenario A"  
383,2,2,1,2,3,4,2,1,1,3,1,1,4,5,"Scenario B"  
383,1,2,1,1,3,2,1,2,1,1,2,4,3,1,"Scenario A"  
383,1,2,2,2,2,3,2,2,2,3,1,4,5,1,"Scenario A"  
383,2,1,2,1,2,1,4,1,1,1,3,2,5,2,"Scenario A"  
383,2,1,1,3,1,2,1,1,2,3,2,4,3,4,"Scenario B"  
383,1,1,3,3,1,5,2,2,2,2,1,3,1,3,"Scenario B"  
383,1,1,2,2,3,3,3,2,2,3,1,2,4,5,"Scenario A"  
383,1,2,2,3,1,5,4,2,1,3,2,4,2,5,"Scenario A"  
384,2,1,2,2,3,2,1,1,2,3,2,1,5,4,"Scenario A"  
384,1,2,2,3,2,1,5,2,1,1,1,4,3,3,"Scenario B"  
384,2,2,1,1,2,4,5,1,2,2,2,3,1,1,"Scenario A"  
384,1,1,3,3,1,4,1,2,2,1,2,4,3,2,"Scenario A"  
384,2,1,2,1,4,2,3,1,1,3,3,1,5,3,"Scenario A"  
384,2,2,3,1,1,1,1,1,1,1,3,3,3,4,"Scenario A"  
384,1,2,1,2,3,2,4,2,1,2,2,2,5,3,"Scenario B"  
384,2,2,3,3,4,3,5,2,1,2,1,3,5,2,"Scenario B"  
384,1,2,1,1,2,4,5,2,1,3,3,4,2,4,"Scenario A"  
384,1,1,2,2,2,1,1,2,2,3,1,1,1,2,"Scenario B"

385,1,2,2,2,4,3,2,1,1,1,3,3,4,3,"Scenario A"  
385,2,1,3,1,2,5,4,1,2,1,3,4,2,1,"Scenario A"  
385,1,1,1,3,1,4,5,2,2,2,2,2,3,5,"Scenario A"  
385,2,1,2,2,1,4,1,1,2,2,1,3,1,2,"Scenario A"  
385,1,1,3,2,2,2,3,2,2,3,3,1,2,4,"Scenario B"  
385,2,1,1,1,4,1,2,1,2,3,2,2,5,3,"Scenario B"  
385,2,1,1,2,1,4,4,1,2,3,1,3,3,5,"Scenario A"  
385,2,2,2,3,3,5,4,1,2,2,3,4,4,1,"Scenario A"  
385,1,1,2,1,4,3,5,2,1,1,2,3,5,1,"Scenario B"  
385,1,1,3,1,1,1,2,2,2,3,3,2,4,1,"Scenario A"  
388,2,1,2,3,1,3,1,1,2,1,1,1,2,2,"Scenario A"  
388,1,1,2,1,2,2,3,2,2,3,2,4,1,2,"Scenario A"  
388,2,1,3,2,3,5,5,1,2,1,3,4,4,4,"Scenario A"  
388,1,2,3,3,1,4,3,2,1,1,1,2,1,4,"Scenario B"  
388,1,1,2,1,4,5,5,2,2,1,2,3,4,1,"Scenario A"  
388,2,1,2,3,1,1,3,1,2,2,1,2,3,1,"Scenario A"  
388,1,2,1,2,1,3,4,2,1,3,3,3,5,1,"Scenario A"  
388,2,2,3,2,1,1,5,1,1,2,3,4,2,2,"Scenario A"  
388,2,2,3,1,2,4,2,1,1,1,2,2,2,5,"Scenario B"  
388,2,2,1,1,3,3,4,1,1,2,3,1,3,5,"Scenario A"  
378,1,1,3,3,3,1,2,1,2,2,3,2,2,5,"Scenario B"  
378,1,2,3,2,1,1,4,2,1,2,3,4,5,3,"Scenario A"  
378,2,2,1,2,3,4,2,1,1,3,1,1,4,5,"Scenario B"  
378,1,2,1,1,3,2,1,2,1,1,2,4,3,1,"Scenario A"  
378,1,2,2,2,2,3,2,2,2,3,1,4,5,1,"Scenario A"  
378,2,1,2,1,2,1,4,1,1,1,3,2,5,2,"Scenario A"  
378,2,1,1,3,1,2,1,1,2,3,2,4,3,4,"Scenario A"  
378,1,1,3,3,1,5,2,2,2,2,1,3,1,3,"Scenario A"  
378,1,1,2,2,3,3,3,2,2,3,1,2,4,5,"Scenario B"  
378,1,2,2,3,1,5,4,2,1,3,2,4,2,5,"Scenario A"  
379,2,1,2,2,3,2,1,1,2,3,2,1,5,4,"Scenario A"  
379,1,2,2,3,2,1,5,2,1,1,1,4,3,3,"Scenario B"  
379,2,2,1,1,2,4,5,1,2,2,2,3,1,1,"Scenario B"  
379,1,1,3,3,1,4,1,2,2,1,2,4,3,2,"Scenario A"  
379,2,1,2,1,4,2,3,1,1,3,3,1,5,3,"Scenario B"  
379,2,2,3,1,1,1,1,1,1,1,3,3,3,4,"Scenario B"  
379,1,2,1,2,3,2,4,2,1,2,2,2,5,3,"Scenario B"  
379,2,2,3,3,4,3,5,2,1,2,1,3,5,2,"Scenario A"  
379,1,2,1,1,2,4,5,2,1,3,3,4,2,4,"Scenario A"  
379,1,1,2,2,2,1,1,2,2,3,1,1,1,2,"Scenario B"  
392,1,2,2,2,4,3,2,1,1,1,3,3,4,3,"Scenario A"  
392,2,1,3,1,2,5,4,1,2,1,3,4,2,1,"Scenario A"  
392,1,1,1,3,1,4,5,2,2,2,2,2,3,5,"Scenario A"  
392,2,1,2,2,1,4,1,1,2,2,1,3,1,2,"Scenario A"  
392,1,1,3,2,2,2,3,2,2,3,3,1,2,4,"Scenario A"  
392,2,1,1,1,4,1,2,1,2,3,2,2,5,3,"Scenario A"  
392,2,1,1,2,1,4,4,1,2,3,1,3,3,5,"Scenario B"  
392,2,2,2,3,3,5,4,1,2,2,3,4,4,1,"Scenario A"  
392,1,1,2,1,4,3,5,2,1,1,2,3,5,1,"Scenario A"  
392,1,1,3,1,1,1,2,2,2,3,3,2,4,1,"Scenario B"  
412,2,1,2,3,1,3,1,1,2,1,1,1,2,2,"Scenario A"  
412,1,1,2,1,2,2,3,2,2,3,2,4,1,2,"Scenario B"  
412,2,1,3,2,3,5,5,1,2,1,3,4,4,4,"Scenario B"  
412,1,2,3,3,1,4,3,2,1,1,1,2,1,4,"Scenario A"  
412,1,1,2,1,4,5,5,2,2,1,2,3,4,1,"Scenario B"  
412,2,1,2,3,1,1,3,1,2,2,1,2,3,1,"Scenario B"  
412,1,2,1,2,1,3,4,2,1,3,3,3,5,1,"Scenario B"

412,2,2,3,2,1,1,5,1,1,2,3,4,2,2,"Scenario B"  
412,2,2,3,1,2,4,2,1,1,1,2,2,2,5,"Scenario A"  
412,2,2,1,1,3,3,4,1,1,2,3,1,3,5,"Scenario A"  
413,1,1,3,3,3,1,2,1,2,2,3,2,2,5,"Scenario A"  
413,1,2,3,2,1,1,4,2,1,2,3,4,5,3,"Scenario B"  
413,2,2,1,2,3,4,2,1,1,3,1,1,4,5,"Scenario A"  
413,1,2,1,1,3,2,1,2,1,1,2,4,3,1,"Scenario A"  
413,1,2,2,2,2,3,2,2,2,3,1,4,5,1,"Scenario B"  
413,2,1,2,1,2,1,4,1,1,1,3,2,5,2,"Scenario B"  
413,2,1,1,3,1,2,1,1,2,3,2,4,3,4,"Scenario A"  
413,1,1,3,3,1,5,2,2,2,2,1,3,1,3,"Scenario A"  
413,1,1,2,2,3,3,3,2,2,3,1,2,4,5,"Scenario A"  
413,1,2,2,3,1,5,4,2,1,3,2,4,2,5,"Scenario A"  
415,2,1,2,2,3,2,1,1,2,3,2,1,5,4,"Scenario B"  
415,1,2,2,3,2,1,5,2,1,1,1,4,3,3,"Scenario A"  
415,2,2,1,1,2,4,5,1,2,2,2,3,1,1,"Scenario B"  
415,1,1,3,3,1,4,1,2,2,1,2,4,3,2,"Scenario B"  
415,2,1,2,1,4,2,3,1,1,3,3,1,5,3,"Scenario B"  
415,2,2,3,1,1,1,1,1,1,1,3,3,3,4,"Scenario A"  
415,1,2,1,2,3,2,4,2,1,2,2,2,5,3,"Scenario A"  
415,2,2,3,3,4,3,5,2,1,2,1,3,5,2,"Scenario A"  
415,1,2,1,1,2,4,5,2,1,3,3,4,2,4,"Scenario A"  
415,1,1,2,2,2,1,1,2,2,3,1,1,1,2,"Scenario B"  
414,1,2,2,2,4,3,2,1,1,1,3,3,4,3,"Scenario A"  
414,2,1,3,1,2,5,4,1,2,1,3,4,2,1,"Scenario A"  
414,1,1,1,3,1,4,5,2,2,2,2,2,3,5,"Scenario A"  
414,2,1,2,2,1,4,1,1,2,2,1,3,1,2,"Scenario A"  
414,1,1,3,2,2,2,3,2,2,3,3,1,2,4,"Scenario A"  
414,2,1,1,1,4,1,2,1,2,3,2,2,5,3,"Scenario A"  
414,2,1,1,2,1,4,4,1,2,3,1,3,3,5,"Scenario A"  
414,2,2,2,3,3,5,4,1,2,2,3,4,4,1,"Scenario A"  
414,1,1,2,1,4,3,5,2,1,1,2,3,5,1,"Scenario A"  
414,1,1,3,1,1,1,2,2,2,3,3,2,4,1,"Scenario A"  
411,2,1,2,3,1,3,1,1,2,1,1,1,2,2,"Scenario B"  
411,1,1,2,1,2,2,3,2,2,3,2,4,1,2,"Scenario B"  
411,2,1,3,2,3,5,5,1,2,1,3,4,4,4,"Scenario A"  
411,1,2,3,3,1,4,3,2,1,1,1,2,1,4,"Scenario B"  
411,1,1,2,1,4,5,5,2,2,1,2,3,4,1,"Scenario A"  
411,2,1,2,3,1,1,3,1,2,2,1,2,3,1,"Scenario A"  
411,1,2,1,2,1,3,4,2,1,3,3,3,5,1,"Scenario B"  
411,2,2,3,2,1,1,5,1,1,2,3,4,2,2,"Scenario A"  
411,2,2,3,1,2,4,2,1,1,1,2,2,2,5,"Scenario B"  
411,2,2,1,1,3,3,4,1,1,2,3,1,3,5,"Scenario B"  
297,1,1,3,3,3,1,2,1,2,2,3,2,2,5,"Scenario A"  
297,1,2,3,2,1,1,4,2,1,2,3,4,5,3,"Scenario A"  
297,2,2,1,2,3,4,2,1,1,3,1,1,4,5,"Scenario B"  
297,1,2,1,1,3,2,1,2,1,1,2,4,3,1,"Scenario A"  
297,1,2,2,2,2,3,2,2,2,3,1,4,5,1,"Scenario A"  
297,2,1,2,1,2,1,4,1,1,1,3,2,5,2,"Scenario B"  
297,2,1,1,3,1,2,1,1,2,3,2,4,3,4,"Scenario A"  
297,1,1,3,3,1,5,2,2,2,2,1,3,1,3,"Scenario A"  
297,1,1,2,2,3,3,3,2,2,3,1,2,4,5,"Scenario A"  
297,1,2,2,3,1,5,4,2,1,3,2,4,2,5,"Scenario A"  
300,2,1,2,2,3,2,1,1,2,3,2,1,5,4,"Scenario B"  
300,1,2,2,3,2,1,5,2,1,1,1,4,3,3,"Scenario A"  
300,2,2,1,1,2,4,5,1,2,2,2,3,1,1,"Scenario B"  
300,1,1,3,3,1,4,1,2,2,1,2,4,3,2,"Scenario A"

300,2,1,2,1,4,2,3,1,1,3,3,1,5,3,"Scenario B"  
300,2,2,3,1,1,1,1,1,1,1,3,3,3,4,"Scenario A"  
300,1,2,1,2,3,2,4,2,1,2,2,2,5,3,"Scenario B"  
300,2,2,3,3,4,3,5,2,1,2,1,3,5,2,"Scenario B"  
300,1,2,1,1,2,4,5,2,1,3,3,4,2,4,"Scenario A"  
300,1,1,2,2,2,1,1,2,2,3,1,1,1,2,"Scenario A"  
299,1,2,2,2,4,3,2,1,1,1,3,3,4,3,"Scenario B"  
299,2,1,3,1,2,5,4,1,2,1,3,4,2,1,"Scenario B"  
299,1,1,1,3,1,4,5,2,2,2,2,2,3,5,"Scenario A"  
299,2,1,2,2,1,4,1,1,2,2,1,3,1,2,"Scenario B"  
299,1,1,3,2,2,2,3,2,2,3,3,1,2,4,"Scenario A"  
299,2,1,1,1,4,1,2,1,2,3,2,2,5,3,"Scenario B"  
299,2,1,1,2,1,4,4,1,2,3,1,3,3,5,"Scenario A"  
299,2,2,2,3,3,5,4,1,2,2,3,4,4,1,"Scenario B"  
299,1,1,2,1,4,3,5,2,1,1,2,3,5,1,"Scenario B"  
299,1,1,3,1,1,1,2,2,2,3,3,2,4,1,"Scenario B"  
298,2,1,2,3,1,3,1,1,2,1,1,1,2,2,"Scenario B"  
298,1,1,2,1,2,2,3,2,2,3,2,4,1,2,"Scenario A"  
298,2,1,3,2,3,5,5,1,2,1,3,4,4,4,"Scenario B"  
298,1,2,3,3,1,4,3,2,1,1,1,2,1,4,"Scenario A"  
298,1,1,2,1,4,5,5,2,2,1,2,3,4,1,"Scenario B"  
298,2,1,2,3,1,1,3,1,2,2,1,2,3,1,"Scenario B"  
298,1,2,1,2,1,3,4,2,1,3,3,3,5,1,"Scenario B"  
298,2,2,3,2,1,1,5,1,1,2,3,4,2,2,"Scenario A"  
298,2,2,3,1,2,4,2,1,1,1,2,2,2,5,"Scenario A"  
298,2,2,1,1,3,3,4,1,1,2,3,1,3,5,"Scenario B"  
303,1,1,3,3,3,1,2,1,2,2,3,2,2,5,"Scenario B"  
303,1,2,3,2,1,1,4,2,1,2,3,4,5,3,"Scenario A"  
303,2,2,1,2,3,4,2,1,1,3,1,1,4,5,"Scenario A"  
303,1,2,1,1,3,2,1,2,1,1,2,4,3,1,"Scenario B"  
303,1,2,2,2,2,3,2,2,2,3,1,4,5,1,"Scenario B"  
303,2,1,2,1,2,1,4,1,1,1,3,2,5,2,"Scenario B"  
303,2,1,1,3,1,2,1,1,2,3,2,4,3,4,"Scenario A"  
303,1,1,3,3,1,5,2,2,2,2,1,3,1,3,"Scenario A"  
303,1,1,2,2,3,3,3,2,2,3,1,2,4,5,"Scenario A"  
303,1,2,2,3,1,5,4,2,1,3,2,4,2,5,"Scenario A"  
292,2,1,2,2,3,2,1,1,2,3,2,1,5,4,"Scenario A"  
292,1,2,2,3,2,1,5,2,1,1,1,4,3,3,"Scenario B"  
292,2,2,1,1,2,4,5,1,2,2,2,3,1,1,"Scenario A"  
292,1,1,3,3,1,4,1,2,2,1,2,4,3,2,"Scenario A"  
292,2,1,2,1,4,2,3,1,1,3,3,1,5,3,"Scenario A"  
292,2,2,3,1,1,1,1,1,1,1,3,3,3,4,"Scenario A"  
292,1,2,1,2,3,2,4,2,1,2,2,2,5,3,"Scenario B"  
292,2,2,3,3,4,3,5,2,1,2,1,3,5,2,"Scenario B"  
292,1,2,1,1,2,4,5,2,1,3,3,4,2,4,"Scenario B"  
292,1,1,2,2,2,1,1,2,2,3,1,1,1,2,"Scenario A"  
301,1,2,2,2,4,3,2,1,1,1,3,3,4,3,"Scenario A"  
301,2,1,3,1,2,5,4,1,2,1,3,4,2,1,"Scenario A"  
301,1,1,1,3,1,4,5,2,2,2,2,2,3,5,"Scenario A"  
301,2,1,2,2,1,4,1,1,2,2,1,3,1,2,"Scenario A"  
301,1,1,3,2,2,2,3,2,2,3,3,1,2,4,"Scenario B"  
301,2,1,1,1,4,1,2,1,2,3,2,2,5,3,"Scenario A"  
301,2,1,1,2,1,4,4,1,2,3,1,3,3,5,"Scenario A"  
301,2,2,2,3,3,5,4,1,2,2,3,4,4,1,"Scenario B"  
301,1,1,2,1,4,3,5,2,1,1,2,3,5,1,"Scenario A"  
301,1,1,3,1,1,1,2,2,2,3,3,2,4,1,"Scenario B"  
290,2,1,2,3,1,3,1,1,2,1,1,1,2,2,"Scenario A"

290,1,1,2,1,2,2,3,2,2,3,2,4,1,2,"Scenario B"  
290,2,1,3,2,3,5,5,1,2,1,3,4,4,4,"Scenario B"  
290,1,2,3,3,1,4,3,2,1,1,1,2,1,4,"Scenario A"  
290,1,1,2,1,4,5,5,2,2,1,2,3,4,1,"Scenario B"  
290,2,1,2,3,1,1,3,1,2,2,1,2,3,1,"Scenario B"  
290,1,2,1,2,1,3,4,2,1,3,3,3,5,1,"Scenario A"  
290,2,2,3,2,1,1,5,1,1,2,3,4,2,2,"Scenario B"  
290,2,2,3,1,2,4,2,1,1,1,2,2,2,5,"Scenario A"  
290,2,2,1,1,3,3,4,1,1,2,3,1,3,5,"Scenario A"  
484,1,1,3,3,3,1,2,1,2,2,3,2,2,5,"Scenario B"  
484,1,2,3,2,1,1,4,2,1,2,3,4,5,3,"Scenario B"  
484,2,2,1,2,3,4,2,1,1,3,1,1,4,5,"Scenario A"  
484,1,2,1,1,3,2,1,2,1,1,2,4,3,1,"Scenario B"  
484,1,2,2,2,2,3,2,2,2,3,1,4,5,1,"Scenario B"  
484,2,1,2,1,2,1,4,1,1,1,3,2,5,2,"Scenario B"  
484,2,1,1,3,1,2,1,1,2,3,2,4,3,4,"Scenario A"  
484,1,1,3,3,1,5,2,2,2,2,1,3,1,3,"Scenario A"  
484,1,1,2,2,3,3,3,2,2,3,1,2,4,5,"Scenario A"  
484,1,2,2,3,1,5,4,2,1,3,2,4,2,5,"Scenario B"  
291,2,1,2,2,3,2,1,1,2,3,2,1,5,4,"Scenario A"  
291,1,2,2,3,2,1,5,2,1,1,1,4,3,3,"Scenario B"  
291,2,2,1,1,2,4,5,1,2,2,2,3,1,1,"Scenario A"  
291,1,1,3,3,1,4,1,2,2,1,2,4,3,2,"Scenario B"  
291,2,1,2,1,4,2,3,1,1,3,3,1,5,3,"Scenario B"  
291,2,2,3,1,1,1,1,1,1,1,3,3,3,4,"Scenario A"  
291,1,2,1,2,3,2,4,2,1,2,2,2,5,3,"Scenario A"  
291,2,2,3,3,4,3,5,2,1,2,1,3,5,2,"Scenario A"  
291,1,2,1,1,2,4,5,2,1,3,3,4,2,4,"Scenario B"  
291,1,1,2,2,2,1,1,2,2,3,1,1,1,2,"Scenario A"  
476,1,2,2,2,4,3,2,1,1,1,3,3,4,3,"Scenario B"  
476,2,1,3,1,2,2,5,4,1,2,1,3,4,2,1,"Scenario A"  
476,1,1,1,3,1,4,5,2,2,2,2,2,3,5,"Scenario A"  
476,2,1,2,2,1,4,1,1,2,2,1,3,1,2,"Scenario B"  
476,1,1,3,2,2,2,3,2,2,3,3,1,2,4,"Scenario B"  
476,2,1,1,1,4,1,2,1,2,3,2,2,5,3,"Scenario B"  
476,2,1,1,2,1,4,4,1,2,3,1,3,3,5,"Scenario A"  
476,2,2,2,3,3,5,4,1,2,2,3,4,4,1,"Scenario A"  
476,1,1,2,1,4,3,5,2,1,1,2,3,5,1,"Scenario A"  
476,1,1,3,1,1,1,2,2,2,3,3,2,4,1,"Scenario A"  
244,2,1,2,3,1,3,1,1,2,1,1,1,2,2,"Scenario A"  
244,1,1,2,1,2,2,3,2,2,3,2,4,1,2,"Scenario B"  
244,2,1,3,2,3,5,5,1,2,1,3,4,4,4,"Scenario A"  
244,1,2,3,3,1,4,3,2,1,1,1,2,1,4,"Scenario A"  
244,1,1,2,1,4,5,5,2,2,1,2,3,4,1,"Scenario B"  
244,2,1,2,3,1,1,3,1,2,2,1,2,3,1,"Scenario B"  
244,1,2,1,2,1,3,4,2,1,3,3,3,5,1,"Scenario B"  
244,2,2,3,2,1,1,5,1,1,2,3,4,2,2,"Scenario B"  
244,2,2,3,1,2,4,2,1,1,1,2,2,2,5,"Scenario A"  
244,2,2,1,1,3,3,4,1,1,2,3,1,3,5,"Scenario A"  
477,1,1,3,3,3,1,2,1,2,2,3,2,2,5,"Scenario A"  
477,1,2,3,2,1,1,4,2,1,2,3,4,5,3,"Scenario B"  
477,2,2,1,2,3,4,2,1,1,3,1,1,4,5,"Scenario A"  
477,1,2,1,1,3,2,1,2,1,1,2,4,3,1,"Scenario A"  
477,1,2,2,2,2,3,2,2,2,3,1,4,5,1,"Scenario B"  
477,2,1,2,1,2,1,4,1,1,1,3,2,5,2,"Scenario B"  
477,2,1,1,3,1,2,1,1,2,3,2,4,3,4,"Scenario A"  
477,1,1,3,3,1,5,2,2,2,2,1,3,1,3,"Scenario A"



477,1,1,2,2,3,3,3,2,2,3,1,2,4,5,"Scenario A"  
477,1,2,2,3,1,5,4,2,1,3,2,4,2,5,"Scenario A"  
245,2,1,2,2,3,2,1,1,2,3,2,1,5,4,"Scenario B"  
245,1,2,2,3,2,1,5,2,1,1,1,4,3,3,"Scenario A"  
245,2,2,1,1,2,4,5,1,2,2,2,3,1,1,"Scenario A"  
245,1,1,3,3,1,4,1,2,2,1,2,4,3,2,"Scenario B"  
245,2,1,2,1,4,2,3,1,1,3,3,1,5,3,"Scenario A"  
245,2,2,3,1,1,1,1,1,1,1,3,3,3,4,"Scenario A"  
245,1,2,1,2,3,2,4,2,1,2,2,2,5,3,"Scenario A"  
245,2,2,3,3,4,3,5,2,1,2,1,3,5,2,"Scenario A"  
245,1,2,1,1,2,4,5,2,1,3,3,4,2,4,"Scenario A"  
245,1,1,2,2,2,1,1,2,2,3,1,1,1,2,"Scenario B"  
481,1,2,2,2,4,3,2,1,1,1,3,3,4,3,"Scenario A"  
481,2,1,3,1,2,5,4,1,2,1,3,4,2,1,"Scenario B"  
481,1,1,1,3,1,4,5,2,2,2,2,2,3,5,"Scenario B"  
481,2,1,2,2,1,4,1,1,2,2,1,3,1,2,"Scenario A"  
481,1,1,3,2,2,2,3,2,2,3,3,1,2,4,"Scenario B"  
481,2,1,1,1,4,1,2,1,2,3,2,2,5,3,"Scenario B"  
481,2,1,1,2,1,4,4,1,2,3,1,3,3,5,"Scenario B"  
481,2,2,2,3,3,5,4,1,2,2,3,4,4,1,"Scenario B"  
481,1,1,2,1,4,3,5,2,1,1,2,3,5,1,"Scenario A"  
481,1,1,3,1,1,1,2,2,2,3,3,2,4,1,"Scenario A"  
407,2,1,2,3,1,3,1,1,2,1,1,1,2,2,"Scenario A"  
407,1,1,2,1,2,2,3,2,2,3,2,4,1,2,"Scenario B"  
407,2,1,3,2,3,5,5,1,2,1,3,4,4,4,"Scenario A"  
407,1,2,3,3,1,4,3,2,1,1,1,2,1,4,"Scenario A"  
407,1,1,2,1,4,5,5,2,2,1,2,3,4,1,"Scenario B"  
407,2,1,2,3,1,1,3,1,2,2,1,2,3,1,"Scenario B"  
407,1,2,1,2,1,3,4,2,1,3,3,3,5,1,"Scenario A"  
407,2,2,3,2,1,1,5,1,1,2,3,4,2,2,"Scenario A"  
407,2,2,3,1,2,4,2,1,1,1,2,2,2,5,"Scenario A"  
407,2,2,1,1,3,3,4,1,1,2,3,1,3,5,"Scenario A"  
486,1,1,3,3,3,1,2,1,2,2,3,2,2,5,"Scenario A"  
486,1,2,3,2,1,1,4,2,1,2,3,4,5,3,"Scenario A"  
486,2,2,1,2,3,4,2,1,1,3,1,1,4,5,"Scenario B"  
486,1,2,1,1,3,2,1,2,1,1,2,4,3,1,"Scenario B"  
486,1,2,2,2,2,3,2,2,2,3,1,4,5,1,"Scenario A"  
486,2,1,2,1,2,1,4,1,1,1,3,2,5,2,"Scenario A"  
486,2,1,1,3,1,2,1,1,2,3,2,4,3,4,"Scenario A"  
486,1,1,3,3,1,5,2,2,2,2,1,3,1,3,"Scenario A"  
486,1,1,2,2,3,3,3,2,2,3,1,2,4,5,"Scenario A"  
486,1,2,2,3,1,5,4,2,1,3,2,4,2,5,"Scenario B"  
312,2,1,2,2,3,2,1,1,2,3,2,1,5,4,"Scenario A"  
312,1,2,2,3,2,1,5,2,1,1,1,4,3,3,"Scenario B"  
312,2,2,1,1,2,4,5,1,2,2,2,3,1,1,"Scenario B"  
312,1,1,3,3,1,4,1,2,2,1,2,4,3,2,"Scenario A"  
312,2,1,2,1,4,2,3,1,1,3,3,1,5,3,"Scenario B"  
312,2,2,3,1,1,1,1,1,1,1,3,3,3,4,"Scenario A"  
312,1,2,1,2,3,2,1,2,3,2,4,2,1,2,2,5,3,"Scenario B"  
312,2,2,3,3,4,3,5,2,1,2,1,3,5,2,"Scenario B"  
312,1,2,1,1,2,4,5,2,1,3,3,4,2,4,"Scenario B"  
312,1,1,2,2,2,1,1,2,2,3,1,1,1,2,"Scenario A"  
310,1,2,2,2,4,3,2,1,1,1,3,3,4,3,"Scenario A"  
310,2,1,3,1,2,5,4,1,2,1,3,4,2,1,"Scenario B"  
310,1,1,1,3,1,4,5,2,2,2,2,2,3,5,"Scenario B"  
310,2,1,2,2,1,4,1,1,2,2,1,3,1,2,"Scenario B"  
310,1,1,3,2,2,2,3,2,2,3,3,1,2,4,"Scenario A"

310,2,1,1,1,4,1,2,1,2,3,2,2,5,3,"Scenario A"  
310,2,1,1,2,1,4,4,1,2,3,1,3,3,5,"Scenario A"  
310,2,2,2,3,3,5,4,1,2,2,3,4,4,1,"Scenario B"  
310,1,1,2,1,4,3,5,2,1,1,2,3,5,1,"Scenario B"  
310,1,1,3,1,1,1,2,2,2,3,3,2,4,1,"Scenario B"  
487,2,1,2,3,1,3,1,1,2,1,1,1,2,2,"Scenario B"  
487,1,1,2,1,2,2,3,2,2,3,2,4,1,2,"Scenario B"  
487,2,1,3,2,3,5,5,1,2,1,3,4,4,4,"Scenario B"  
487,1,2,3,3,1,4,3,2,1,1,1,2,1,4,"Scenario A"  
487,1,1,2,1,4,5,5,2,2,1,2,3,4,1,"Scenario B"  
487,2,1,2,3,1,1,3,1,2,2,1,2,3,1,"Scenario A"  
487,1,2,1,2,1,3,4,2,1,3,3,3,5,1,"Scenario B"  
487,2,2,3,2,1,1,5,1,1,2,3,4,2,2,"Scenario A"  
487,2,2,3,1,2,4,2,1,1,1,2,2,2,5,"Scenario A"  
487,2,2,1,1,3,3,4,1,1,2,3,1,3,5,"Scenario A"  
304,1,1,3,3,3,1,2,1,2,2,3,2,2,5,"Scenario A"  
304,1,2,3,2,1,1,4,2,1,2,3,4,5,3,"Scenario A"  
304,2,2,1,2,3,4,2,1,1,3,1,1,4,5,"Scenario B"  
304,1,2,1,1,3,2,1,2,1,1,2,4,3,1,"Scenario B"  
304,1,2,2,2,2,3,2,2,2,3,1,4,5,1,"Scenario A"  
304,2,1,2,1,2,1,4,1,1,1,3,2,5,2,"Scenario A"  
304,2,1,1,3,1,2,1,1,2,3,2,4,3,4,"Scenario B"  
304,1,1,3,3,1,5,2,2,2,2,1,3,1,3,"Scenario A"  
304,1,1,2,2,3,3,3,2,2,3,1,2,4,5,"Scenario B"  
304,1,2,2,3,1,5,4,2,1,3,2,4,2,5,"Scenario A"  
406,2,1,2,2,3,2,1,1,2,3,2,1,5,4,"Scenario A"  
406,1,2,2,3,2,1,5,2,1,1,1,4,3,3,"Scenario B"  
406,2,2,1,1,2,4,5,1,2,2,2,3,1,1,"Scenario A"  
406,1,1,3,3,1,4,1,2,2,1,2,4,3,2,"Scenario A"  
406,2,1,2,1,4,2,3,1,1,3,3,1,5,3,"Scenario B"  
406,2,2,3,1,1,1,1,1,1,1,1,3,3,3,4,"Scenario A"  
406,1,2,1,2,3,2,4,2,1,2,2,2,5,3,"Scenario B"  
406,2,2,3,3,4,3,5,2,1,2,1,3,5,2,"Scenario A"  
406,1,2,1,1,2,4,5,2,1,3,3,4,2,4,"Scenario A"  
406,1,1,2,2,2,1,1,2,2,3,1,1,1,2,"Scenario A"  
377,1,2,2,2,4,3,2,1,1,1,3,3,4,3,"Scenario A"  
377,2,1,3,1,2,5,4,1,2,1,3,4,2,1,"Scenario B"  
377,1,1,1,3,1,4,5,2,2,2,2,2,3,5,"Scenario B"  
377,2,1,2,2,1,4,1,1,2,2,1,3,1,2,"Scenario A"  
377,1,1,3,2,2,2,3,2,2,3,3,1,2,4,"Scenario B"  
377,2,1,1,1,4,1,2,1,2,3,2,2,5,3,"Scenario B"  
377,2,1,1,2,1,4,4,1,2,3,1,3,3,5,"Scenario A"  
377,2,2,2,3,3,5,4,1,2,2,3,4,4,1,"Scenario B"  
377,1,1,2,1,4,3,5,2,1,1,2,3,5,1,"Scenario B"  
377,1,1,3,1,1,1,2,2,2,3,3,2,4,1,"Scenario B"  
311,2,1,2,3,1,3,1,1,2,1,1,1,2,2,"Scenario A"  
311,1,1,2,1,2,2,3,2,2,3,2,4,1,2,"Scenario A"  
311,2,1,3,2,3,5,5,1,2,1,3,4,4,4,"Scenario B"  
311,1,2,3,3,1,4,3,2,1,1,1,2,1,4,"Scenario A"  
311,1,1,2,1,4,5,5,2,2,1,2,3,4,1,"Scenario B"  
311,2,1,2,3,1,1,3,1,2,2,1,2,3,1,"Scenario B"  
311,1,2,1,2,1,3,4,2,1,3,3,3,5,1,"Scenario B"  
311,2,2,3,2,1,1,5,1,1,2,3,4,2,2,"Scenario A"  
311,2,2,3,1,2,4,2,1,1,1,2,2,2,5,"Scenario A"  
311,2,2,1,1,3,3,4,1,1,2,3,1,3,5,"Scenario B"  
309,1,1,3,3,3,1,2,1,2,2,3,2,2,5,"Scenario A"  
309,1,2,3,2,1,1,4,2,1,2,3,4,5,3,"Scenario B"

309,2,2,1,2,3,4,2,1,1,3,1,1,4,5,"Scenario A"  
309,1,2,1,1,3,2,1,2,1,1,2,4,3,1,"Scenario B"  
309,1,2,2,2,2,3,2,2,2,3,1,4,5,1,"Scenario B"  
309,2,1,2,1,2,1,4,1,1,1,3,2,5,2,"Scenario B"  
309,2,1,1,3,1,2,1,1,2,3,2,4,3,4,"Scenario A"  
309,1,1,3,3,1,5,2,2,2,2,1,3,1,3,"Scenario A"  
309,1,1,2,2,3,3,3,2,2,3,1,2,4,5,"Scenario A"  
309,1,2,2,3,1,5,4,2,1,3,2,4,2,5,"Scenario A"  
488,2,1,2,2,3,2,1,1,2,3,2,1,5,4,"Scenario B"  
488,1,2,2,3,2,1,5,2,1,1,1,4,3,3,"Scenario A"  
488,2,2,1,1,2,4,5,1,2,2,2,3,1,1,"Scenario A"  
488,1,1,3,3,1,4,1,2,2,1,2,4,3,2,"Scenario B"  
488,2,1,2,1,4,2,3,1,1,3,3,1,5,3,"Scenario B"  
488,2,2,3,1,1,1,1,1,1,1,3,3,3,4,"Scenario B"  
488,1,2,1,2,3,2,4,2,1,2,2,2,5,3,"Scenario B"  
488,2,2,3,3,4,3,5,2,1,2,1,3,5,2,"Scenario A"  
488,1,2,1,1,2,4,5,2,1,3,3,4,2,4,"Scenario A"  
488,1,1,2,2,2,1,1,2,2,3,1,1,1,2,"Scenario A"  
489,1,2,2,2,4,3,2,1,1,1,3,3,4,3,"Scenario A"  
489,2,1,3,1,2,5,4,1,2,1,3,4,2,1,"Scenario A"  
489,1,1,1,3,1,4,5,2,2,2,2,2,3,5,"Scenario B"  
489,2,1,2,2,1,4,1,1,2,2,1,3,1,2,"Scenario B"  
489,1,1,3,2,2,2,3,2,2,3,3,1,2,4,"Scenario A"  
489,2,1,1,1,4,1,2,1,2,3,2,2,5,3,"Scenario A"  
489,2,1,1,2,1,4,4,1,2,3,1,3,3,5,"Scenario A"  
489,2,2,2,3,3,5,4,1,2,2,3,4,4,1,"Scenario B"  
489,1,1,2,1,4,3,5,2,1,1,2,3,5,1,"Scenario B"  
489,1,1,3,1,1,1,2,2,2,3,3,2,4,1,"Scenario B"  
490,2,1,2,3,1,3,1,1,2,1,1,1,2,2,"Scenario A"  
490,1,1,2,1,2,2,3,2,2,3,2,4,1,2,"Scenario B"  
490,2,1,3,2,3,5,5,1,2,1,3,4,4,4,"Scenario B"  
490,1,2,3,3,1,4,3,2,1,1,1,2,1,4,"Scenario A"  
490,1,1,2,1,4,5,5,2,2,1,2,3,4,1,"Scenario B"  
490,2,1,2,3,1,1,3,1,2,2,1,2,3,1,"Scenario B"  
490,1,2,1,2,1,3,4,2,1,3,3,3,5,1,"Scenario B"  
490,2,2,3,2,1,1,5,1,1,2,3,4,2,2,"Scenario A"  
490,2,2,3,1,2,4,2,1,1,1,2,2,2,5,"Scenario B"  
490,2,2,1,1,3,3,4,1,1,2,3,1,3,5,"Scenario A"  
493,1,1,3,3,3,1,2,1,2,2,3,2,2,5,"Scenario A"  
493,1,2,3,2,1,1,4,2,1,2,3,4,5,3,"Scenario B"  
493,2,2,1,2,3,4,2,1,1,3,1,1,4,5,"Scenario A"  
493,1,2,1,1,3,2,1,2,1,1,2,4,3,1,"Scenario B"  
493,1,2,2,2,2,3,2,2,2,3,1,4,5,1,"Scenario A"  
493,2,1,2,1,2,1,4,1,1,1,3,2,5,2,"Scenario A"  
493,2,1,1,3,1,2,1,1,2,3,2,4,3,4,"Scenario A"  
493,1,1,3,3,1,5,2,2,2,2,1,3,1,3,"Scenario B"  
493,1,1,2,2,3,3,3,2,2,3,1,2,4,5,"Scenario A"  
493,1,2,2,3,1,5,4,2,1,3,2,4,2,5,"Scenario A"  
494,2,1,2,2,3,2,1,1,2,3,2,1,5,4,"Scenario A"  
494,1,2,2,3,2,1,5,2,1,1,1,4,3,3,"Scenario B"  
494,2,2,1,1,2,4,5,1,2,2,2,3,1,1,"Scenario B"  
494,1,1,3,3,1,4,1,2,2,1,2,4,3,2,"Scenario A"  
494,2,1,2,1,4,2,3,1,1,3,3,1,5,3,"Scenario B"  
494,2,2,3,1,1,1,1,1,1,1,3,3,3,4,"Scenario A"  
494,1,2,1,2,3,2,4,2,1,2,2,2,5,3,"Scenario A"  
494,2,2,3,3,4,3,5,2,1,2,1,3,5,2,"Scenario B"  
494,1,2,1,1,2,4,5,2,1,3,3,4,2,4,"Scenario A"

494,1,1,2,2,2,1,1,2,2,3,1,1,1,2,"Scenario A"  
235,1,2,2,2,4,3,2,1,1,1,3,3,4,3,"Scenario A"  
235,2,1,3,1,2,5,4,1,2,1,3,4,2,1,"Scenario B"  
235,1,1,1,3,1,4,5,2,2,2,2,2,3,5,"Scenario A"  
235,2,1,2,2,1,4,1,1,2,2,1,3,1,2,"Scenario A"  
235,1,1,3,2,2,2,3,2,2,3,3,1,2,4,"Scenario A"  
235,2,1,1,1,4,1,2,1,2,3,2,2,5,3,"Scenario B"  
235,2,1,1,2,1,4,4,1,2,3,1,3,3,5,"Scenario B"  
235,2,2,2,3,3,5,4,1,2,2,3,4,4,1,"Scenario B"  
235,1,1,2,1,4,3,5,2,1,1,2,3,5,1,"Scenario B"  
235,1,1,3,1,1,1,2,2,2,3,3,2,4,1,"Scenario B"  
345,2,1,2,3,1,3,1,1,2,1,1,1,2,2,"Scenario A"  
345,1,1,2,3,1,2,2,3,2,2,3,2,4,1,2,"Scenario B"  
345,2,1,3,2,3,5,5,1,2,1,3,4,4,4,"Scenario B"  
345,1,2,3,3,1,4,3,2,1,1,1,2,1,4,"Scenario A"  
345,1,1,2,1,4,5,5,2,2,1,2,3,4,1,"Scenario B"  
345,2,1,2,3,1,1,3,1,2,2,1,2,3,1,"Scenario B"  
345,1,2,1,2,1,3,4,2,1,3,3,3,5,1,"Scenario B"  
345,2,2,3,2,1,1,5,1,1,2,3,4,2,2,"Scenario B"  
345,2,2,3,1,2,4,2,1,1,1,2,2,2,5,"Scenario A"  
345,2,2,1,1,3,3,4,1,1,2,3,1,3,5,"Scenario A"  
234,1,1,3,3,3,1,2,1,2,2,3,2,2,5,"Scenario A"  
234,1,2,3,2,1,1,4,2,1,2,3,4,5,3,"Scenario A"  
234,2,2,1,2,3,4,2,1,1,3,1,1,4,5,"Scenario A"  
234,1,2,1,1,3,2,1,2,1,1,2,4,3,1,"Scenario A"  
234,1,2,2,2,2,3,2,2,2,3,1,4,5,1,"Scenario B"  
234,2,1,2,1,2,1,4,1,1,1,3,2,5,2,"Scenario B"  
234,2,1,1,3,1,2,1,1,2,3,2,4,3,4,"Scenario A"  
234,1,1,3,3,1,5,2,2,2,2,1,3,1,3,"Scenario A"  
234,1,1,2,2,3,3,3,2,2,3,1,2,4,5,"Scenario B"  
234,1,2,2,3,1,5,4,2,1,3,2,4,2,5,"Scenario A"  
236,2,1,2,2,3,2,1,1,2,3,2,1,5,4,"Scenario B"  
236,1,2,2,3,2,1,5,2,1,1,1,4,3,3,"Scenario B"  
236,2,2,1,1,2,4,5,1,2,2,2,3,1,1,"Scenario B"  
236,1,1,3,3,1,4,1,2,2,1,2,4,3,2,"Scenario A"  
236,2,1,2,1,4,2,3,1,1,3,3,1,5,3,"Scenario B"  
236,2,2,3,1,1,1,1,1,1,1,3,3,3,4,"Scenario A"  
236,1,2,1,2,3,2,4,2,1,2,2,2,5,3,"Scenario B"  
236,2,2,3,3,4,3,5,2,1,2,1,3,5,2,"Scenario B"  
236,1,2,1,1,2,4,5,2,1,3,3,4,2,4,"Scenario B"  
236,1,1,2,2,2,1,1,2,2,3,1,1,1,2,"Scenario A"  
237,1,2,2,2,4,3,2,1,1,1,3,3,4,3,"Scenario B"  
237,2,1,3,1,2,5,4,1,2,1,3,4,2,1,"Scenario A"  
237,1,1,1,3,1,4,5,2,2,2,2,2,3,5,"Scenario A"  
237,2,1,2,2,1,4,1,1,2,2,1,3,1,2,"Scenario A"  
237,1,1,3,2,2,2,3,2,2,3,3,1,2,4,"Scenario B"  
237,2,1,1,1,4,1,2,1,2,3,2,2,5,3,"Scenario B"  
237,2,1,1,2,1,4,4,1,2,3,1,3,3,5,"Scenario A"  
237,2,2,2,3,3,5,4,1,2,2,3,4,4,1,"Scenario A"  
237,1,1,2,1,4,3,5,2,1,1,2,3,5,1,"Scenario B"  
237,1,1,3,1,1,1,2,2,2,3,3,2,4,1,"Scenario A"  
349,2,1,2,3,1,3,1,1,2,1,1,1,2,2,"Scenario A"  
349,1,1,2,1,2,2,3,2,2,3,2,4,1,2,"Scenario B"  
349,2,1,3,2,3,5,5,1,2,1,3,4,4,4,"Scenario B"  
349,1,2,3,3,1,4,3,2,1,1,1,2,1,4,"Scenario A"  
349,1,1,2,1,4,5,5,2,2,1,2,3,4,1,"Scenario B"  
349,2,1,2,3,1,1,3,1,2,2,1,2,3,1,"Scenario A"

349,1,2,1,2,1,3,4,2,1,3,3,3,5,1,"Scenario B"  
349,2,2,3,2,1,1,5,1,1,2,3,4,2,2,"Scenario B"  
349,2,2,3,1,2,4,2,1,1,1,2,2,2,5,"Scenario A"  
349,2,2,1,1,3,3,4,1,1,2,3,1,3,5,"Scenario A"  
344,1,1,3,3,3,1,2,1,2,2,3,2,2,5,"Scenario B"  
344,1,2,3,2,1,1,4,2,1,2,3,4,5,3,"Scenario B"  
344,2,2,1,2,3,4,2,1,1,3,1,1,4,5,"Scenario A"  
344,1,2,1,1,3,2,1,2,1,1,2,4,3,1,"Scenario B"  
344,1,2,2,2,2,3,2,2,2,3,1,4,5,1,"Scenario B"  
344,2,1,2,1,2,1,4,1,1,1,3,2,5,2,"Scenario A"  
344,2,1,1,3,1,2,1,1,2,3,2,4,3,4,"Scenario A"  
344,1,1,3,3,1,5,2,2,2,2,1,3,1,3,"Scenario B"  
344,1,1,2,2,3,3,3,2,2,3,1,2,4,5,"Scenario B"  
344,1,2,2,3,1,5,4,2,1,3,2,4,2,5,"Scenario B"  
352,2,1,2,2,3,2,1,1,2,3,2,1,5,4,"Scenario A"  
352,1,2,2,3,2,1,5,2,1,1,1,4,3,3,"Scenario B"  
352,2,2,1,1,2,4,5,1,2,2,2,3,1,1,"Scenario B"  
352,1,1,3,3,1,4,1,2,2,1,2,4,3,2,"Scenario A"  
352,2,1,2,1,4,2,3,1,1,3,3,1,5,3,"Scenario A"  
352,2,2,3,1,1,1,1,1,1,1,3,3,3,4,"Scenario B"  
352,1,2,1,2,3,2,4,2,1,2,2,2,5,3,"Scenario B"  
352,2,2,3,3,4,3,5,2,1,2,1,3,5,2,"Scenario A"  
352,1,2,1,1,2,4,5,2,1,3,3,4,2,4,"Scenario B"  
352,1,1,2,2,2,1,1,2,2,3,1,1,1,2,"Scenario B"  
346,1,2,2,2,4,3,2,1,1,1,3,3,4,3,"Scenario A"  
346,2,1,3,1,2,5,4,1,2,1,3,4,2,1,"Scenario A"  
346,1,1,1,3,1,4,5,2,2,2,2,2,3,5,"Scenario B"  
346,2,1,2,2,1,4,1,1,2,2,1,3,1,2,"Scenario A"  
346,1,1,3,2,2,2,3,2,2,3,3,1,2,4,"Scenario B"  
346,2,1,1,1,4,1,2,1,2,3,2,2,5,3,"Scenario A"  
346,2,1,1,2,1,4,4,1,2,3,1,3,3,5,"Scenario A"  
346,2,2,2,3,3,5,4,1,2,2,3,4,4,1,"Scenario A"  
346,1,1,2,1,4,3,5,2,1,1,2,3,5,1,"Scenario B"  
346,1,1,3,1,1,1,2,2,2,3,3,2,4,1,"Scenario B"  
350,2,1,2,3,1,3,1,1,2,1,1,1,2,2,"Scenario A"  
350,1,1,2,1,2,2,3,2,2,3,2,4,1,2,"Scenario B"  
350,2,1,3,2,3,5,5,1,2,1,3,4,4,4,"Scenario A"  
350,1,2,3,3,1,4,3,2,1,1,1,2,1,4,"Scenario B"  
350,1,1,2,1,4,5,5,2,2,1,2,3,4,1,"Scenario B"  
350,2,1,2,3,1,1,3,1,2,2,1,2,3,1,"Scenario A"  
350,1,2,1,2,1,3,4,2,1,3,3,3,5,1,"Scenario B"  
350,2,2,3,2,1,1,5,1,1,2,3,4,2,2,"Scenario A"  
350,2,2,3,1,2,4,2,1,1,1,2,2,2,5,"Scenario A"  
350,2,2,1,1,3,3,4,1,1,2,3,1,3,5,"Scenario A"  
353,1,1,3,3,3,1,2,1,2,2,3,2,2,5,"Scenario A"  
353,1,2,3,2,1,1,4,2,1,2,3,4,5,3,"Scenario A"  
353,2,2,1,2,3,4,2,1,1,3,1,1,4,5,"Scenario B"  
353,1,2,1,1,3,2,1,2,1,2,1,1,2,4,3,1,"Scenario B"  
353,1,2,2,2,2,3,2,2,2,3,1,4,5,1,"Scenario B"  
353,2,1,2,1,2,1,4,1,1,1,3,2,5,2,"Scenario A"  
353,2,1,1,3,1,2,1,1,2,3,2,4,3,4,"Scenario A"  
353,1,1,3,3,1,5,2,2,2,2,1,3,1,3,"Scenario A"  
353,1,1,2,2,3,3,3,2,2,3,1,2,4,5,"Scenario A"  
353,1,2,2,3,1,5,4,2,1,3,2,4,2,5,"Scenario B"  
440,2,1,2,2,3,2,1,1,2,3,2,1,5,4,"Scenario A"  
440,1,2,2,3,2,1,5,2,1,1,1,4,3,3,"Scenario B"  
440,2,2,1,1,2,4,5,1,2,2,2,3,1,1,"Scenario B"

440,1,1,3,3,1,4,1,2,2,1,2,4,3,2,"Scenario A"  
440,2,1,2,1,4,2,3,1,1,3,3,1,5,3,"Scenario A"  
440,2,2,3,1,1,1,1,1,1,1,3,3,3,4,"Scenario A"  
440,1,2,1,2,3,2,4,2,1,2,2,2,5,3,"Scenario B"  
440,2,2,3,3,4,3,5,2,1,2,1,3,5,2,"Scenario A"  
440,1,2,1,1,2,4,5,2,1,3,3,4,2,4,"Scenario B"  
440,1,1,2,2,2,1,1,2,2,3,1,1,1,2,"Scenario B"  
351,1,2,2,2,4,3,2,1,1,1,3,3,4,3,"Scenario A"  
351,2,1,3,1,2,5,4,1,2,1,3,4,2,1,"Scenario A"  
351,1,1,1,3,1,4,5,2,2,2,2,2,3,5,"Scenario B"  
351,2,1,2,2,1,4,1,1,2,2,1,3,1,2,"Scenario A"  
351,1,1,3,2,2,2,3,2,2,3,3,1,2,4,"Scenario B"  
351,2,1,1,1,2,4,1,2,1,2,3,2,2,5,3,"Scenario A"  
351,2,1,1,2,1,4,4,1,2,3,1,3,3,5,"Scenario A"  
351,2,2,2,3,3,5,4,1,2,2,3,4,4,1,"Scenario A"  
351,1,1,2,1,4,3,5,2,1,1,2,3,5,1,"Scenario B"  
351,1,1,3,1,1,1,2,2,2,3,3,2,4,1,"Scenario B"  
348,2,1,2,3,1,3,1,1,2,1,1,1,2,2,"Scenario A"  
348,1,1,2,1,2,2,3,2,2,3,2,4,1,2,"Scenario B"  
348,2,1,3,2,3,5,5,1,2,1,3,4,4,4,"Scenario A"  
348,1,2,3,3,1,4,3,2,1,1,1,2,1,4,"Scenario B"  
348,1,1,2,1,4,5,5,2,2,1,2,3,4,1,"Scenario B"  
348,2,1,2,3,1,1,3,1,2,2,1,2,3,1,"Scenario A"  
348,1,2,1,2,1,3,4,2,1,3,3,3,5,1,"Scenario B"  
348,2,2,3,2,1,1,5,1,1,2,3,4,2,2,"Scenario A"  
348,2,2,3,1,2,4,2,1,1,1,2,2,2,5,"Scenario A"  
348,2,2,1,1,3,3,4,1,1,2,3,1,3,5,"Scenario A"  
347,1,1,3,3,3,1,2,1,2,2,3,2,2,5,"Scenario B"  
347,1,2,3,2,1,1,4,2,1,2,3,4,5,3,"Scenario B"  
347,2,2,1,2,3,4,2,1,1,3,1,1,4,5,"Scenario A"  
347,1,2,1,1,3,2,1,2,1,1,2,4,3,1,"Scenario B"  
347,1,2,2,2,2,3,2,2,2,3,1,4,5,1,"Scenario B"  
347,2,1,2,1,2,1,4,1,1,1,3,2,5,2,"Scenario A"  
347,2,1,1,3,1,2,1,1,2,3,2,4,3,4,"Scenario A"  
347,1,1,3,3,1,5,2,2,2,2,1,3,1,3,"Scenario B"  
347,1,1,2,2,3,3,3,2,2,3,1,2,4,5,"Scenario B"  
347,1,2,2,3,1,5,4,2,1,3,2,4,2,5,"Scenario B"  
34,2,1,2,2,3,2,1,1,2,3,2,1,5,4,"Scenario A"  
34,1,2,2,3,2,1,5,2,1,1,1,4,3,3,"Scenario A"  
34,2,2,1,1,2,4,5,1,2,2,2,3,1,1,"Scenario B"  
34,1,1,3,3,1,4,1,2,2,1,2,4,3,2,"Scenario B"  
34,2,1,2,1,4,2,3,1,1,3,3,1,5,3,"Scenario B"  
34,2,2,3,1,1,1,1,1,1,1,3,3,3,4,"Scenario A"  
34,1,2,1,2,3,2,4,2,1,2,2,2,5,3,"Scenario A"  
34,2,2,3,3,4,3,5,2,1,2,1,3,5,2,"Scenario A"  
34,1,2,1,1,2,4,5,2,1,3,3,4,2,4,"Scenario B"  
34,1,1,2,2,2,1,1,2,2,3,1,1,1,2,"Scenario B"  
32,1,2,2,2,4,3,2,1,1,1,3,3,4,3,"Scenario A"  
32,2,1,3,1,2,5,4,1,2,1,3,4,2,1,"Scenario A"  
32,1,1,1,3,1,4,5,2,2,2,2,2,3,5,"Scenario B"  
32,2,1,2,2,1,4,1,1,2,2,1,3,1,2,"Scenario B"  
32,1,1,3,2,2,2,3,2,2,3,3,1,2,4,"Scenario B"  
32,2,1,1,1,4,1,2,1,2,3,2,2,5,3,"Scenario A"  
32,2,1,1,2,1,4,4,1,2,3,1,3,3,5,"Scenario B"  
32,2,2,2,3,3,5,4,1,2,2,3,4,4,1,"Scenario A"  
32,1,1,2,1,4,3,5,2,1,1,2,3,5,1,"Scenario B"  
32,1,1,3,1,1,1,2,2,2,3,3,2,4,1,"Scenario B"

37,2,1,2,3,1,3,1,1,2,1,1,1,2,2,"Scenario A"  
37,1,1,2,1,2,2,3,2,2,3,2,4,1,2,"Scenario B"  
37,2,1,3,2,3,5,5,1,2,1,3,4,4,4,"Scenario A"  
37,1,2,3,3,1,4,3,2,1,1,1,2,1,4,"Scenario A"  
37,1,1,2,1,4,5,5,2,2,1,2,3,4,1,"Scenario B"  
37,2,1,2,3,1,1,3,1,2,2,1,2,3,1,"Scenario B"  
37,1,2,1,2,1,3,4,2,1,3,3,3,5,1,"Scenario A"  
37,2,2,3,2,1,1,5,1,1,2,3,4,2,2,"Scenario A"  
37,2,2,3,1,2,4,2,1,1,1,2,2,2,5,"Scenario A"  
37,2,2,1,1,3,3,4,1,1,2,3,1,3,5,"Scenario A"  
38,1,1,3,3,3,1,2,1,2,2,3,2,2,5,"Scenario A"  
38,1,2,3,2,1,1,4,2,1,2,3,4,5,3,"Scenario A"  
38,2,2,1,2,3,4,2,1,1,3,1,1,4,5,"Scenario B"  
38,1,2,1,1,3,2,1,2,1,1,2,4,3,1,"Scenario B"  
38,1,2,2,2,2,3,2,2,2,3,1,4,5,1,"Scenario A"  
38,2,1,2,1,2,1,4,1,1,1,3,2,5,2,"Scenario B"  
38,2,1,1,3,1,2,1,1,2,3,2,4,3,4,"Scenario A"  
38,1,1,3,3,1,5,2,2,2,2,1,3,1,3,"Scenario A"  
38,1,1,2,2,3,3,3,2,2,3,1,2,4,5,"Scenario B"  
38,1,2,2,3,1,5,4,2,1,3,2,4,2,5,"Scenario B"  
33,2,1,2,2,3,2,1,1,2,3,2,1,5,4,"Scenario A"  
33,1,2,2,3,2,1,5,2,1,1,1,4,3,3,"Scenario A"  
33,2,2,1,1,2,4,5,1,2,2,2,3,1,1,"Scenario B"  
33,1,1,3,3,1,4,1,2,2,1,2,4,3,2,"Scenario B"  
33,2,1,2,1,4,2,3,1,1,3,3,1,5,3,"Scenario A"  
33,2,2,3,1,1,1,1,1,1,1,3,3,3,4,"Scenario A"  
33,1,2,1,2,3,2,4,2,1,2,2,2,5,3,"Scenario A"  
33,2,2,3,3,4,3,5,2,1,2,1,3,5,2,"Scenario B"  
33,1,2,1,1,2,4,5,2,1,3,3,4,2,4,"Scenario B"  
33,1,1,2,2,2,1,1,2,2,3,1,1,1,2,"Scenario A"  
454,1,2,2,2,2,4,3,2,1,1,1,3,3,4,3,"Scenario A"  
454,2,1,3,1,2,5,4,1,2,1,3,4,2,1,"Scenario A"  
454,1,1,1,3,1,4,5,2,2,2,2,2,3,5,"Scenario B"  
454,2,1,2,2,1,4,1,1,2,2,1,3,1,2,"Scenario B"  
454,1,1,3,2,2,2,3,2,2,3,3,1,2,4,"Scenario B"  
454,2,1,1,1,4,1,2,1,2,3,2,2,5,3,"Scenario A"  
454,2,1,1,2,1,4,4,1,2,3,1,3,3,5,"Scenario A"  
454,2,2,2,3,3,5,4,1,2,2,3,4,4,1,"Scenario B"  
454,1,1,2,1,4,3,5,2,1,1,2,3,5,1,"Scenario B"  
454,1,1,3,1,1,1,2,2,2,3,3,2,4,1,"Scenario A"  
458,2,1,2,3,1,3,1,1,2,1,1,1,2,2,"Scenario A"  
458,1,1,2,1,2,2,3,2,2,3,2,4,1,2,"Scenario B"  
458,2,1,3,2,3,5,5,1,2,1,3,4,4,4,"Scenario B"  
458,1,2,3,3,1,4,3,2,1,1,1,2,1,4,"Scenario A"  
458,1,1,2,1,4,5,5,2,2,1,2,3,4,1,"Scenario B"  
458,2,1,2,3,1,1,3,1,2,2,1,2,3,1,"Scenario B"  
458,1,2,1,2,1,3,4,2,1,3,3,3,5,1,"Scenario B"  
458,2,2,3,2,1,1,5,1,1,2,3,4,2,2,"Scenario B"  
458,2,2,3,1,2,4,2,1,1,1,2,2,2,5,"Scenario A"  
458,2,2,1,1,3,3,4,1,1,2,3,1,3,5,"Scenario B"  
39,1,1,3,3,3,1,2,1,2,2,3,2,2,5,"Scenario A"  
39,1,2,3,2,1,1,4,2,1,2,3,4,5,3,"Scenario B"  
39,2,2,1,2,3,4,2,1,1,3,1,1,4,5,"Scenario A"  
39,1,2,1,1,3,2,1,2,1,1,2,4,3,1,"Scenario A"  
39,1,2,2,2,2,3,2,2,2,3,1,4,5,1,"Scenario B"  
39,2,1,2,1,2,1,4,1,1,1,3,2,5,2,"Scenario A"  
39,2,1,1,3,1,2,1,1,2,3,2,4,3,4,"Scenario B"

39,1,1,3,3,1,5,2,2,2,2,1,3,1,3,"Scenario A"  
39,1,1,2,2,3,3,3,2,2,3,1,2,4,5,"Scenario A"  
39,1,2,2,3,1,5,4,2,1,3,2,4,2,5,"Scenario A"  
35,2,1,2,2,3,2,1,1,2,3,2,1,5,4,"Scenario A"  
35,1,2,2,3,2,1,5,2,1,1,1,4,3,3,"Scenario A"  
35,2,2,1,1,2,4,5,1,2,2,2,3,1,1,"Scenario A"  
35,1,1,3,3,1,4,1,2,2,1,2,4,3,2,"Scenario B"  
35,2,1,2,1,4,2,3,1,1,3,3,1,5,3,"Scenario A"  
35,2,2,3,1,1,1,1,1,1,1,3,3,3,4,"Scenario B"  
35,1,2,1,2,3,2,4,2,1,2,2,2,5,3,"Scenario B"  
35,2,2,3,3,4,3,5,2,1,2,1,3,5,2,"Scenario A"  
35,1,2,1,1,2,4,5,2,1,3,3,4,2,4,"Scenario A"  
35,1,1,2,2,2,2,1,1,2,2,3,1,1,1,2,"Scenario A"  
36,1,2,2,2,4,3,2,1,1,1,3,3,4,3,"Scenario A"  
36,2,1,3,1,2,5,4,1,2,1,3,4,2,1,"Scenario A"  
36,1,1,1,3,1,4,5,2,2,2,2,2,3,5,"Scenario B"  
36,2,1,2,2,1,4,1,1,2,2,1,3,1,2,"Scenario B"  
36,1,1,3,2,2,2,3,2,2,3,3,1,2,4,"Scenario A"  
36,2,1,1,1,4,1,2,1,2,3,2,2,5,3,"Scenario A"  
36,2,1,1,2,1,4,4,1,2,3,1,3,3,5,"Scenario B"  
36,2,2,2,3,3,5,4,1,2,2,3,4,4,1,"Scenario B"  
36,1,1,2,1,4,3,5,2,1,1,2,3,5,1,"Scenario B"  
36,1,1,3,1,1,1,2,2,2,3,3,2,4,1,"Scenario A"  
327,2,1,2,3,1,3,1,1,2,1,1,1,2,2,"Scenario A"  
327,1,1,2,1,2,2,3,2,2,3,2,4,1,2,"Scenario A"  
327,2,1,3,2,3,5,5,1,2,1,3,4,4,4,"Scenario A"  
327,1,2,3,3,1,4,3,2,1,1,1,2,1,4,"Scenario B"  
327,1,1,2,1,4,5,5,2,2,1,2,3,4,1,"Scenario B"  
327,2,1,2,3,1,1,3,1,2,2,1,2,3,1,"Scenario A"  
327,1,2,1,2,1,3,4,2,1,3,3,3,5,1,"Scenario A"  
327,2,2,3,2,1,1,5,1,1,2,3,4,2,2,"Scenario B"  
327,2,2,3,1,2,4,2,1,1,1,2,2,2,5,"Scenario B"  
327,2,2,1,1,3,3,4,1,1,2,3,1,3,5,"Scenario A"  
328,1,1,3,3,3,1,2,1,2,2,3,2,2,5,"Scenario B"  
328,1,2,3,2,1,1,4,2,1,2,3,4,5,3,"Scenario B"  
328,2,2,1,2,3,4,2,1,1,3,1,1,4,5,"Scenario A"  
328,1,2,1,1,3,2,1,2,1,1,2,4,3,1,"Scenario A"  
328,1,2,2,2,2,3,2,2,2,3,1,4,5,1,"Scenario A"  
328,2,1,2,1,2,1,4,1,1,1,3,2,5,2,"Scenario B"  
328,2,1,1,3,1,2,1,1,2,3,2,4,3,4,"Scenario A"  
328,1,1,3,3,1,5,2,2,2,2,1,3,1,3,"Scenario B"  
328,1,1,2,2,3,3,3,2,2,3,1,2,4,5,"Scenario A"  
328,1,2,2,3,1,5,4,2,1,3,2,4,2,5,"Scenario A"  
370,2,1,2,2,3,2,1,1,2,3,2,1,5,4,"Scenario A"  
370,1,2,2,3,2,1,5,2,1,1,1,4,3,3,"Scenario A"  
370,2,2,1,1,2,4,5,1,2,2,2,3,1,1,"Scenario B"  
370,1,1,3,3,1,4,1,2,2,1,2,4,3,2,"Scenario B"  
370,2,1,2,1,4,2,3,1,1,3,3,1,5,3,"Scenario B"  
370,2,2,3,1,1,1,1,1,1,1,3,3,3,4,"Scenario A"  
370,1,2,1,2,3,2,4,2,1,2,2,2,5,3,"Scenario A"  
370,2,2,3,3,4,3,5,2,1,2,1,3,5,2,"Scenario B"  
370,1,2,1,1,2,4,5,2,1,3,3,4,2,4,"Scenario B"  
370,1,1,2,2,2,1,1,2,2,3,1,1,1,2,"Scenario A"  
368,1,2,2,2,4,3,2,1,1,1,3,3,4,3,"Scenario A"  
368,2,1,3,1,2,5,4,1,2,1,3,4,2,1,"Scenario A"  
368,1,1,1,3,1,4,5,2,2,2,2,2,3,5,"Scenario A"  
368,2,1,2,2,1,4,1,1,2,2,1,3,1,2,"Scenario B"



368,1,1,3,2,2,2,3,2,2,3,3,1,2,4,"Scenario B"  
368,2,1,1,1,4,1,2,1,2,3,2,2,5,3,"Scenario A"  
368,2,1,1,2,1,4,4,1,2,3,1,3,3,5,"Scenario A"  
368,2,2,2,3,3,5,4,1,2,2,3,4,4,1,"Scenario B"  
368,1,1,2,1,4,3,5,2,1,1,2,3,5,1,"Scenario B"  
368,1,1,3,1,1,1,2,2,2,3,3,2,4,1,"Scenario B"  
456,2,1,2,3,1,3,1,1,2,1,1,1,2,2,"Scenario A"  
456,1,1,2,1,2,2,3,2,2,3,2,4,1,2,"Scenario B"  
456,2,1,3,2,3,5,5,1,2,1,3,4,4,4,"Scenario B"  
456,1,2,3,3,1,4,3,2,1,1,1,2,1,4,"Scenario B"  
456,1,1,2,1,4,5,5,2,2,1,2,3,4,1,"Scenario B"  
456,2,1,2,3,1,1,3,1,2,2,1,2,3,1,"Scenario B"  
456,1,2,1,2,1,3,4,2,1,3,3,3,5,1,"Scenario B"  
456,2,2,3,2,1,1,5,1,1,2,3,4,2,2,"Scenario B"  
456,2,2,3,1,2,4,2,1,1,1,2,2,2,5,"Scenario A"  
456,2,2,1,1,3,3,4,1,1,2,3,1,3,5,"Scenario A"  
438,1,1,3,3,3,1,2,1,2,2,3,2,2,5,"Scenario B"  
438,1,2,3,2,1,1,4,2,1,2,3,4,5,3,"Scenario B"  
438,2,2,1,2,3,4,2,1,1,3,1,1,4,5,"Scenario A"  
438,1,2,1,1,3,2,1,2,1,1,2,4,3,1,"Scenario B"  
438,1,2,2,2,2,3,2,2,2,3,1,4,5,1,"Scenario B"  
438,2,1,2,1,2,1,4,1,1,1,3,2,5,2,"Scenario B"  
438,2,1,1,3,1,2,1,1,2,3,2,4,3,4,"Scenario A"  
438,1,1,3,3,1,5,2,2,2,2,1,3,1,3,"Scenario B"  
438,1,1,2,2,3,3,3,2,2,3,1,2,4,5,"Scenario B"  
438,1,2,2,3,1,5,4,2,1,3,2,4,2,5,"Scenario A"  
408,2,1,2,2,3,2,1,1,2,3,2,1,5,4,"Scenario A"  
408,1,2,2,3,2,1,5,2,1,1,1,4,3,3,"Scenario B"  
408,2,2,1,1,2,4,5,1,2,2,2,3,1,1,"Scenario B"  
408,1,1,3,3,1,4,1,2,2,1,2,4,3,2,"Scenario A"  
408,2,1,2,1,4,2,3,1,1,3,3,1,5,3,"Scenario A"  
408,2,2,3,1,1,1,1,1,1,1,3,3,3,4,"Scenario A"  
408,1,2,1,2,3,2,4,2,1,2,2,2,5,3,"Scenario B"  
408,2,2,3,3,4,3,5,2,1,2,1,3,5,2,"Scenario A"  
408,1,2,1,1,2,4,5,2,1,3,3,4,2,4,"Scenario B"  
408,1,1,2,2,2,1,1,2,2,3,1,1,1,2,"Scenario A"  
357,1,2,2,2,4,3,2,1,1,1,3,3,4,3,"Scenario A"  
357,2,1,3,1,2,5,4,1,2,1,3,4,2,1,"Scenario A"  
357,1,1,1,3,1,4,5,2,2,2,2,2,3,5,"Scenario B"  
357,2,1,2,2,1,4,1,1,2,2,1,3,1,2,"Scenario A"  
357,1,1,3,2,2,2,3,2,2,3,3,1,2,4,"Scenario B"  
357,2,1,1,1,4,1,2,1,2,3,2,2,5,3,"Scenario A"  
357,2,1,1,2,1,4,4,1,2,3,1,3,3,5,"Scenario A"  
357,2,2,2,3,3,5,4,1,2,2,3,4,4,1,"Scenario A"  
357,1,1,2,1,4,3,5,2,1,1,2,3,5,1,"Scenario B"  
357,1,1,3,1,1,1,2,2,2,3,3,2,4,1,"Scenario B"  
356,2,1,2,3,1,3,1,1,2,1,1,1,2,2,"Scenario A"  
356,1,1,2,1,2,2,3,2,2,3,2,4,1,2,"Scenario B"  
356,2,1,3,2,3,5,5,1,2,1,3,4,4,4,"Scenario A"  
356,1,2,3,3,1,4,3,2,1,1,1,2,1,4,"Scenario B"  
356,1,1,2,1,4,5,5,2,2,1,2,3,4,1,"Scenario B"  
356,2,1,2,3,1,1,3,1,2,2,1,2,3,1,"Scenario A"  
356,1,2,1,2,1,3,4,2,1,3,3,3,5,1,"Scenario B"  
356,2,2,3,2,1,1,5,1,1,2,3,4,2,2,"Scenario A"  
356,2,2,3,1,2,4,2,1,1,1,2,2,2,5,"Scenario A"  
356,2,2,1,1,3,3,4,1,1,2,3,1,3,5,"Scenario A"  
441,1,1,3,3,3,1,2,1,2,2,3,2,2,5,"Scenario A"

441,1,2,3,2,1,1,4,2,1,2,3,4,5,3,"Scenario B"  
441,2,2,1,2,3,4,2,1,1,3,1,1,4,5,"Scenario A"  
441,1,2,1,1,3,2,1,2,1,1,2,4,3,1,"Scenario A"  
441,1,2,2,2,2,3,2,2,2,3,1,4,5,1,"Scenario B"  
441,2,1,2,1,2,1,4,1,1,1,3,2,5,2,"Scenario B"  
441,2,1,1,3,1,2,1,1,2,3,2,4,3,4,"Scenario A"  
441,1,1,3,3,1,5,2,2,2,2,1,3,1,3,"Scenario A"  
441,1,1,2,2,3,3,3,2,2,3,1,2,4,5,"Scenario B"  
441,1,2,2,3,1,5,4,2,1,3,2,4,2,5,"Scenario A"  
358,2,1,2,2,3,2,1,1,2,3,2,1,5,4,"Scenario A"  
358,1,2,2,3,2,1,5,2,1,1,1,4,3,3,"Scenario B"  
358,2,2,1,1,2,4,5,1,2,2,2,3,1,1,"Scenario A"  
358,1,1,3,3,1,4,1,2,2,1,2,4,3,2,"Scenario B"  
358,2,1,2,1,4,2,3,1,1,3,3,1,5,3,"Scenario A"  
358,2,2,3,1,1,1,1,1,1,1,3,3,3,4,"Scenario A"  
358,1,2,1,2,3,2,4,2,1,2,2,2,5,3,"Scenario B"  
358,2,2,3,3,4,3,5,2,1,2,1,3,5,2,"Scenario A"  
358,1,2,1,1,2,4,5,2,1,3,3,4,2,4,"Scenario B"  
358,1,1,2,2,2,1,1,2,2,3,1,1,1,2,"Scenario B"  
341,1,2,2,2,4,3,2,1,1,1,3,3,4,3,"Scenario A"  
341,2,1,3,1,2,5,4,1,2,1,3,4,2,1,"Scenario A"  
341,1,1,1,3,1,4,5,2,2,2,2,2,3,5,"Scenario B"  
341,2,1,2,2,1,4,1,1,2,2,1,3,1,2,"Scenario A"  
341,1,1,3,2,2,2,3,2,2,3,3,1,2,4,"Scenario B"  
341,2,1,1,1,4,1,2,1,2,3,2,2,5,3,"Scenario A"  
341,2,1,1,2,1,4,4,1,2,3,1,3,3,5,"Scenario A"  
341,2,2,2,3,3,5,4,1,2,2,3,4,4,1,"Scenario A"  
341,1,1,2,1,4,3,5,2,1,1,2,3,5,1,"Scenario B"  
341,1,1,3,1,1,1,2,2,2,3,3,2,4,1,"Scenario B"  
355,2,1,2,3,1,3,1,1,2,1,1,1,2,2,"Scenario A"  
355,1,1,2,1,2,2,3,2,2,3,2,4,1,2,"Scenario A"  
355,2,1,3,2,3,5,5,1,2,1,3,4,4,4,"Scenario B"  
355,1,2,3,3,1,4,3,2,1,1,1,2,1,4,"Scenario A"  
355,1,1,2,1,4,5,5,2,2,1,2,3,4,1,"Scenario B"  
355,2,1,2,3,1,1,3,1,2,2,1,2,3,1,"Scenario A"  
355,1,2,1,2,1,3,4,2,1,3,3,3,5,1,"Scenario B"  
355,2,2,3,2,1,1,5,1,1,2,3,4,2,2,"Scenario B"  
355,2,2,3,1,2,4,2,1,1,1,2,2,2,5,"Scenario B"  
355,2,2,1,1,3,3,4,1,1,2,3,1,3,5,"Scenario A"  
233,1,1,3,3,3,1,2,1,2,2,3,2,2,5,"Scenario A"  
233,1,2,3,2,1,1,4,2,1,2,3,4,5,3,"Scenario B"  
233,2,2,1,2,3,4,2,1,1,3,1,1,4,5,"Scenario A"  
233,1,2,1,1,3,2,1,2,1,1,2,4,3,1,"Scenario A"  
233,1,2,2,2,2,3,2,2,2,3,1,4,5,1,"Scenario B"  
233,2,1,2,1,2,1,4,1,1,1,3,2,5,2,"Scenario B"  
233,2,1,1,3,1,2,1,1,2,3,2,4,3,4,"Scenario A"  
233,1,1,3,3,1,5,2,2,2,2,1,3,1,3,"Scenario A"  
233,1,1,2,2,3,3,3,2,2,3,1,2,4,5,"Scenario A"  
233,1,2,2,3,1,5,4,2,1,3,2,4,2,5,"Scenario A"  
354,2,1,2,2,3,2,1,1,2,3,2,1,5,4,"Scenario A"  
354,1,2,2,3,2,1,5,2,1,1,1,4,3,3,"Scenario A"  
354,2,2,1,1,2,4,5,1,2,2,2,3,1,1,"Scenario B"  
354,1,1,3,3,1,4,1,2,2,1,2,4,3,2,"Scenario A"  
354,2,1,2,1,4,2,3,1,1,3,3,1,5,3,"Scenario B"  
354,2,2,3,1,1,1,1,1,1,1,3,3,3,4,"Scenario A"  
354,1,2,1,2,3,2,4,2,1,2,2,2,5,3,"Scenario B"  
354,2,2,3,3,4,3,5,2,1,2,1,3,5,2,"Scenario B"

354,1,2,1,1,2,4,5,2,1,3,3,4,2,4,"Scenario B"  
354,1,1,2,2,2,1,1,2,2,3,1,1,1,2,"Scenario A"  
457,1,2,2,2,4,3,2,1,1,1,3,3,4,3,"Scenario A"  
457,2,1,3,1,2,5,4,1,2,1,3,4,2,1,"Scenario B"  
457,1,1,1,3,1,4,5,2,2,2,2,2,3,5,"Scenario A"  
457,2,1,2,2,1,4,1,1,2,2,1,3,1,2,"Scenario A"  
457,1,1,3,2,2,2,3,2,2,3,3,1,2,4,"Scenario A"  
457,2,1,1,1,4,1,2,1,2,3,2,2,5,3,"Scenario A"  
457,2,1,1,2,1,4,4,1,2,3,1,3,3,5,"Scenario A"  
457,2,2,2,3,3,5,4,1,2,2,3,4,4,1,"Scenario B"  
457,1,1,2,1,4,3,5,2,1,1,2,3,5,1,"Scenario B"  
457,1,1,3,1,1,1,2,2,2,3,3,2,4,1,"Scenario B"  
404,2,1,2,3,1,3,1,1,2,1,1,1,2,2,"Scenario A"  
404,1,1,2,1,2,2,3,2,2,3,2,4,1,2,"Scenario B"  
404,2,1,3,2,3,5,5,1,2,1,3,4,4,4,"Scenario A"  
404,1,2,3,3,1,4,3,2,1,1,1,2,1,4,"Scenario A"  
404,1,1,2,1,4,5,5,2,2,1,2,3,4,1,"Scenario B"  
404,2,1,2,3,1,1,3,1,2,2,1,2,3,1,"Scenario B"  
404,1,2,1,2,1,3,4,2,1,3,3,3,5,1,"Scenario B"  
404,2,2,3,2,1,1,5,1,1,2,3,4,2,2,"Scenario B"  
404,2,2,3,1,2,4,2,1,1,1,2,2,2,5,"Scenario A"  
404,2,2,1,1,3,3,4,1,1,2,3,1,3,5,"Scenario A"  
403,1,1,3,3,3,1,2,1,2,2,3,2,2,5,"Scenario A"  
403,1,2,3,2,1,1,4,2,1,2,3,4,5,3,"Scenario A"  
403,2,2,1,2,3,4,2,1,1,3,1,1,4,5,"Scenario A"  
403,1,2,1,1,3,2,1,2,1,1,2,4,3,1,"Scenario B"  
403,1,2,2,2,2,3,2,2,2,3,1,4,5,1,"Scenario B"  
403,2,1,2,1,2,1,4,1,1,1,3,2,5,2,"Scenario B"  
403,2,1,1,3,1,2,1,1,2,3,2,4,3,4,"Scenario A"  
403,1,1,3,3,1,5,2,2,2,2,1,3,1,3,"Scenario A"  
403,1,1,2,2,3,3,3,2,2,3,1,2,4,5,"Scenario A"  
403,1,2,2,3,1,5,4,2,1,3,2,4,2,5,"Scenario A"  
369,2,1,2,2,3,2,1,1,2,3,2,1,5,4,"Scenario A"  
369,1,2,2,3,2,1,5,2,1,1,1,4,3,3,"Scenario A"  
369,2,2,1,1,2,4,5,1,2,2,2,3,1,1,"Scenario B"  
369,1,1,3,3,1,4,1,2,2,1,2,4,3,2,"Scenario B"  
369,2,1,2,1,4,2,3,1,1,3,3,1,5,3,"Scenario A"  
369,2,2,3,1,1,1,1,1,1,1,3,3,3,4,"Scenario A"  
369,1,2,1,2,3,2,4,2,1,2,2,2,5,3,"Scenario B"  
369,2,2,3,3,4,3,5,2,1,2,1,3,5,2,"Scenario B"  
369,1,2,1,1,2,4,5,2,1,3,3,4,2,4,"Scenario B"  
369,1,1,2,2,2,1,1,2,2,3,1,1,1,2,"Scenario A"  
455,1,2,2,2,4,3,2,1,1,1,3,3,4,3,"Scenario A"  
455,2,1,3,1,2,5,4,1,2,1,3,4,2,1,"Scenario B"  
455,1,1,1,3,1,4,5,2,2,2,2,2,3,5,"Scenario B"  
455,2,1,2,2,1,4,1,1,2,2,1,3,1,2,"Scenario A"  
455,1,1,3,2,2,2,3,2,2,3,3,1,2,4,"Scenario A"  
455,2,1,1,1,4,1,2,1,2,3,2,2,5,3,"Scenario B"  
455,2,1,1,2,1,4,4,1,2,3,1,3,3,5,"Scenario B"  
455,2,2,2,3,3,5,4,1,2,2,3,4,4,1,"Scenario B"  
455,1,1,2,1,4,3,5,2,1,1,2,3,5,1,"Scenario A"  
455,1,1,3,1,1,1,2,2,2,3,3,2,4,1,"Scenario B"  
60,2,1,2,3,1,3,1,1,2,1,1,1,2,2,"Scenario A"  
60,1,1,2,1,2,2,3,2,2,3,2,4,1,2,"Scenario B"  
60,2,1,3,2,3,5,5,1,2,1,3,4,4,4,"Scenario B"  
60,1,2,3,3,1,4,3,2,1,1,1,2,1,4,"Scenario A"  
60,1,1,2,1,4,5,5,2,2,1,2,3,4,1,"Scenario B"

60,2,1,2,3,1,1,3,1,2,2,1,2,3,1,"Scenario B"  
60,1,2,1,2,1,3,4,2,1,3,3,3,5,1,"Scenario B"  
60,2,2,3,2,1,1,5,1,1,2,3,4,2,2,"Scenario B"  
60,2,2,3,1,2,4,2,1,1,1,2,2,2,5,"Scenario A"  
60,2,2,1,1,3,3,4,1,1,2,3,1,3,5,"Scenario A"  
7,1,1,3,3,3,1,2,1,2,2,3,2,2,5,"Scenario B"  
7,1,2,3,2,1,1,4,2,1,2,3,4,5,3,"Scenario A"  
7,2,2,1,2,3,4,2,1,1,3,1,1,4,5,"Scenario B"  
7,1,2,1,1,3,2,1,2,1,1,2,4,3,1,"Scenario A"  
7,1,2,2,2,2,3,2,2,2,3,1,4,5,1,"Scenario A"  
7,2,1,2,1,2,1,4,1,1,1,3,2,5,2,"Scenario B"  
7,2,1,1,3,1,2,1,1,2,3,2,4,3,4,"Scenario A"  
7,1,1,3,3,1,5,2,2,2,2,1,3,1,3,"Scenario A"  
7,1,1,2,2,3,3,3,2,2,3,1,2,4,5,"Scenario B"  
7,1,2,2,3,1,5,4,2,1,3,2,4,2,5,"Scenario A"  
62,2,1,2,2,3,2,1,1,2,3,2,1,5,4,"Scenario A"  
62,1,2,2,3,2,1,5,2,1,1,1,4,3,3,"Scenario B"  
62,2,2,1,1,2,4,5,1,2,2,2,3,1,1,"Scenario B"  
62,1,1,3,3,1,4,1,2,2,1,2,4,3,2,"Scenario A"  
62,2,1,2,1,4,2,3,1,1,3,3,1,5,3,"Scenario A"  
62,2,2,3,1,1,1,1,1,1,1,3,3,3,4,"Scenario A"  
62,1,2,1,2,3,2,4,2,1,2,2,2,5,3,"Scenario B"  
62,2,2,3,3,4,3,5,2,1,2,1,3,5,2,"Scenario B"  
62,1,2,1,1,2,4,5,2,1,3,3,4,2,4,"Scenario B"  
62,1,1,2,2,2,1,1,2,2,3,1,1,1,2,"Scenario A"  
4,1,2,2,2,4,3,2,1,1,1,3,3,4,3,"Scenario A"  
4,2,1,3,1,2,5,4,1,2,1,3,4,2,1,"Scenario B"  
4,1,1,1,3,1,4,5,2,2,2,2,2,3,5,"Scenario B"  
4,2,1,2,2,1,4,1,1,2,2,1,3,1,2,"Scenario A"  
4,1,1,3,2,2,2,3,2,2,3,3,1,2,4,"Scenario A"  
4,2,1,1,1,4,1,2,1,2,3,2,2,5,3,"Scenario A"  
4,2,1,1,2,1,4,4,1,2,3,1,3,3,5,"Scenario A"  
4,2,2,2,3,3,5,4,1,2,2,3,4,4,1,"Scenario B"  
4,1,1,2,1,4,3,5,2,1,1,2,3,5,1,"Scenario B"  
4,1,1,3,1,1,1,2,2,2,3,3,2,4,1,"Scenario B"  
63,2,1,2,3,1,3,1,1,2,1,1,1,2,2,"Scenario A"  
63,1,1,2,1,2,2,3,2,2,3,2,4,1,2,"Scenario B"  
63,2,1,3,2,3,5,5,1,2,1,3,4,4,4,"Scenario A"  
63,1,2,3,3,1,4,3,2,1,1,1,2,1,4,"Scenario A"  
63,1,1,2,1,4,5,5,2,2,1,2,3,4,1,"Scenario A"  
63,2,1,2,3,1,1,3,1,2,2,1,2,3,1,"Scenario B"  
63,1,2,1,2,1,3,4,2,1,3,3,3,5,1,"Scenario B"  
63,2,2,3,2,1,1,5,1,1,2,3,4,2,2,"Scenario A"  
63,2,2,3,1,2,4,2,1,1,1,2,2,2,5,"Scenario B"  
63,2,2,1,1,3,3,4,1,1,2,3,1,3,5,"Scenario B"  
422,1,1,3,3,3,1,2,1,2,2,3,2,2,5,"Scenario A"  
422,1,2,3,2,1,1,4,2,1,2,3,4,5,3,"Scenario B"  
422,2,2,1,2,3,4,2,1,1,3,1,1,4,5,"Scenario B"  
422,1,2,1,1,3,2,1,2,1,1,2,4,3,1,"Scenario A"  
422,1,2,2,2,2,3,2,2,2,3,1,4,5,1,"Scenario A"  
422,2,1,2,1,2,1,4,1,1,1,3,2,5,2,"Scenario B"  
422,2,1,1,3,1,2,1,1,2,3,2,4,3,4,"Scenario B"  
422,1,1,3,3,1,5,2,2,2,2,1,3,1,3,"Scenario B"  
422,1,1,2,2,3,3,3,2,2,3,1,2,4,5,"Scenario A"  
422,1,2,2,3,1,5,4,2,1,3,2,4,2,5,"Scenario B"  
68,2,1,2,2,3,2,1,1,2,3,2,1,5,4,"Scenario A"  
68,1,2,2,3,2,1,5,2,1,1,1,4,3,3,"Scenario B"

68,2,2,1,1,2,4,5,1,2,2,2,3,1,1,"Scenario B"  
68,1,1,3,3,1,4,1,2,2,1,2,4,3,2,"Scenario A"  
68,2,1,2,1,4,2,3,1,1,3,3,1,5,3,"Scenario A"  
68,2,2,3,1,1,1,1,1,1,1,3,3,3,4,"Scenario A"  
68,1,2,1,2,3,2,4,2,1,2,2,2,5,3,"Scenario B"  
68,2,2,3,3,4,3,5,2,1,2,1,3,5,2,"Scenario B"  
68,1,2,1,1,2,4,5,2,1,3,3,4,2,4,"Scenario B"  
68,1,1,2,2,2,1,1,2,2,3,1,1,1,2,"Scenario A"  
423,1,2,2,2,4,3,2,1,1,1,3,3,4,3,"Scenario B"  
423,2,1,3,1,2,5,4,1,2,1,3,4,2,1,"Scenario A"  
423,1,1,1,3,1,4,5,2,2,2,2,2,3,5,"Scenario A"  
423,2,1,2,2,1,4,1,1,2,2,1,3,1,2,"Scenario A"  
423,1,1,3,2,2,2,3,2,2,3,3,1,2,4,"Scenario A"  
423,2,1,1,1,4,1,2,1,2,3,2,2,5,3,"Scenario A"  
423,2,1,1,2,1,4,4,1,2,3,1,3,3,5,"Scenario B"  
423,2,2,2,3,3,5,4,1,2,2,3,4,4,1,"Scenario A"  
423,1,1,2,1,4,3,5,2,1,1,2,3,5,1,"Scenario A"  
423,1,1,3,1,1,1,2,2,2,3,3,2,4,1,"Scenario A"  
306,2,1,2,3,1,3,1,1,2,1,1,1,2,2,"Scenario A"  
306,1,1,2,1,2,2,3,2,2,3,2,4,1,2,"Scenario B"  
306,2,1,3,2,3,5,5,1,2,1,3,4,4,4,"Scenario B"  
306,1,2,3,3,1,4,3,2,1,1,1,2,1,4,"Scenario B"  
306,1,1,2,1,4,5,5,2,2,1,2,3,4,1,"Scenario B"  
306,2,1,2,3,1,1,3,1,2,2,1,2,3,1,"Scenario B"  
306,1,2,1,2,1,3,4,2,1,3,3,3,5,1,"Scenario A"  
306,2,2,3,2,1,1,5,1,1,2,3,4,2,2,"Scenario B"  
306,2,2,3,1,2,4,2,1,1,1,2,2,2,5,"Scenario B"  
306,2,2,1,1,3,3,4,1,1,2,3,1,3,5,"Scenario B"  
376,1,1,3,3,3,1,2,1,2,2,3,2,2,5,"Scenario A"  
376,1,2,3,2,1,1,4,2,1,2,3,4,5,3,"Scenario A"  
376,2,2,1,2,3,4,2,1,1,3,1,1,4,5,"Scenario A"  
376,1,2,1,1,3,2,1,2,1,1,2,4,3,1,"Scenario B"  
376,1,2,2,2,2,3,2,2,2,3,1,4,5,1,"Scenario B"  
376,2,1,2,1,2,1,4,1,1,1,3,2,5,2,"Scenario B"  
376,2,1,1,3,1,2,1,1,2,3,2,4,3,4,"Scenario B"  
376,1,1,3,3,1,5,2,2,2,2,1,3,1,3,"Scenario A"  
376,1,1,2,2,3,3,3,2,2,3,1,2,4,5,"Scenario A"  
376,1,2,2,3,1,5,4,2,1,3,2,4,2,5,"Scenario B"  
305,2,1,2,2,3,2,1,1,2,3,2,1,5,4,"Scenario A"  
305,1,2,2,3,2,1,5,2,1,1,1,4,3,3,"Scenario A"  
305,2,2,1,1,2,4,5,1,2,2,2,3,1,1,"Scenario A"  
305,1,1,3,3,1,4,1,2,2,1,2,4,3,2,"Scenario A"  
305,2,1,2,1,4,2,3,1,1,3,3,1,5,3,"Scenario B"  
305,2,2,3,1,1,1,1,1,1,1,3,3,3,4,"Scenario A"  
305,1,2,1,2,3,2,4,2,1,2,2,2,5,3,"Scenario B"  
305,2,2,3,3,4,3,5,2,1,2,1,3,5,2,"Scenario A"  
305,1,2,1,1,2,4,5,2,1,3,3,4,2,4,"Scenario B"  
305,1,1,2,2,2,1,1,2,2,3,1,1,1,2,"Scenario B"  
409,1,2,2,2,4,3,2,1,1,1,3,3,4,3,"Scenario A"  
409,2,1,3,1,2,5,4,1,2,1,3,4,2,1,"Scenario B"  
409,1,1,1,3,1,4,5,2,2,2,2,2,3,5,"Scenario B"  
409,2,1,2,2,1,4,1,1,2,2,1,3,1,2,"Scenario A"  
409,1,1,3,2,2,2,3,2,2,3,3,1,2,4,"Scenario B"  
409,2,1,1,1,4,1,2,1,2,3,2,2,5,3,"Scenario B"  
409,2,1,1,2,1,4,4,1,2,3,1,3,3,5,"Scenario B"  
409,2,2,2,3,3,5,4,1,2,2,3,4,4,1,"Scenario B"  
409,1,1,2,1,4,3,5,2,1,1,2,3,5,1,"Scenario B"

409,1,1,3,1,1,1,2,2,2,3,3,2,4,1,"Scenario B"  
410,2,1,2,3,1,3,1,1,2,1,1,1,2,2,"Scenario A"  
410,1,1,2,1,2,2,3,2,2,3,2,4,1,2,"Scenario B"  
410,2,1,3,2,3,5,5,1,2,1,3,4,4,4,"Scenario A"  
410,1,2,3,3,1,4,3,2,1,1,1,2,1,4,"Scenario A"  
410,1,1,2,1,4,5,5,2,2,1,2,3,4,1,"Scenario B"  
410,2,1,2,3,1,1,3,1,2,2,1,2,3,1,"Scenario B"  
410,1,2,1,2,1,3,4,2,1,3,3,3,5,1,"Scenario B"  
410,2,2,3,2,1,1,5,1,1,2,3,4,2,2,"Scenario B"  
410,2,2,3,1,2,4,2,1,1,1,2,2,2,5,"Scenario A"  
410,2,2,1,1,3,3,4,1,1,2,3,1,3,5,"Scenario A"  
461,1,1,3,3,3,1,2,1,2,2,3,2,2,5,"Scenario B"  
461,1,2,3,2,1,1,4,2,1,2,3,4,5,3,"Scenario B"  
461,2,2,1,2,3,4,2,1,1,3,1,1,4,5,"Scenario A"  
461,1,2,1,1,3,2,1,2,1,1,2,4,3,1,"Scenario B"  
461,1,2,2,2,2,3,2,2,2,3,1,4,5,1,"Scenario B"  
461,2,1,2,1,2,1,4,1,1,1,3,2,5,2,"Scenario A"  
461,2,1,1,3,1,2,1,1,2,3,2,4,3,4,"Scenario B"  
461,1,1,3,3,1,5,2,2,2,2,1,3,1,3,"Scenario A"  
461,1,1,2,2,3,3,3,2,2,3,1,2,4,5,"Scenario B"  
461,1,2,2,3,1,5,4,2,1,3,2,4,2,5,"Scenario A"  
437,2,1,2,2,3,2,1,1,2,3,2,1,5,4,"Scenario A"  
437,1,2,2,3,2,1,5,2,1,1,1,4,3,3,"Scenario B"  
437,2,2,1,1,2,4,5,1,2,2,2,3,1,1,"Scenario B"  
437,1,1,3,3,1,4,1,2,2,1,2,4,3,2,"Scenario B"  
437,2,1,2,1,4,2,3,1,1,3,3,1,5,3,"Scenario A"  
437,2,2,3,1,1,1,1,1,1,1,3,3,3,4,"Scenario A"  
437,1,2,1,2,3,2,4,2,1,2,2,2,5,3,"Scenario B"  
437,2,2,3,3,4,3,5,2,1,2,1,3,5,2,"Scenario A"  
437,1,2,1,1,2,4,5,2,1,3,3,4,2,4,"Scenario B"  
437,1,1,2,2,2,2,1,1,2,2,3,1,1,1,2,"Scenario B"  
451,1,2,2,2,4,3,2,1,1,1,3,3,4,3,"Scenario A"  
451,2,1,3,1,2,5,4,1,2,1,3,4,2,1,"Scenario B"  
451,1,1,1,3,1,4,5,2,2,2,2,2,3,5,"Scenario B"  
451,2,1,2,2,1,4,1,1,2,2,1,3,1,2,"Scenario A"  
451,1,1,3,2,2,2,3,2,2,3,3,1,2,4,"Scenario A"  
451,2,1,1,1,4,1,2,1,2,3,2,2,5,3,"Scenario A"  
451,2,1,1,2,1,4,4,1,2,3,1,3,3,5,"Scenario A"  
451,2,2,2,3,3,5,4,1,2,2,3,4,4,1,"Scenario B"  
451,1,1,2,1,4,3,5,2,1,1,2,3,5,1,"Scenario B"  
451,1,1,3,1,1,1,2,2,2,3,3,2,4,1,"Scenario B"  
446,2,1,2,3,1,3,1,1,2,1,1,1,2,2,"Scenario A"  
446,1,1,2,1,2,2,3,2,2,3,2,4,1,2,"Scenario B"  
446,2,1,3,2,3,5,5,1,2,1,3,4,4,4,"Scenario B"  
446,1,2,3,3,1,4,3,2,1,1,1,2,1,4,"Scenario A"  
446,1,1,2,1,4,5,5,2,2,1,2,3,4,1,"Scenario B"  
446,2,1,2,3,1,1,3,1,2,2,1,2,3,1,"Scenario B"  
446,1,2,1,2,1,3,4,2,1,3,3,3,5,1,"Scenario B"  
446,2,2,3,2,1,1,5,1,1,2,3,4,2,2,"Scenario B"  
446,2,2,3,1,2,4,2,1,1,1,2,2,2,5,"Scenario A"  
446,2,2,1,1,3,3,4,1,1,2,3,1,3,5,"Scenario A"  
320,1,1,3,3,3,1,2,1,2,2,3,2,2,5,"Scenario A"  
320,1,2,3,2,1,1,4,2,1,2,3,4,5,3,"Scenario A"  
320,2,2,1,2,3,4,2,1,1,3,1,1,4,5,"Scenario A"  
320,1,2,1,1,3,2,1,2,1,1,2,4,3,1,"Scenario A"  
320,1,2,2,2,2,3,2,2,2,3,1,4,5,1,"Scenario A"  
320,2,1,2,1,2,1,4,1,1,1,3,2,5,2,"Scenario A"

320,2,1,1,3,1,2,1,1,2,3,2,4,3,4,"Scenario A"  
320,1,1,3,3,1,5,2,2,2,2,1,3,1,3,"Scenario B"  
320,1,1,2,2,3,3,3,2,2,3,1,2,4,5,"Scenario A"  
320,1,2,2,3,1,5,4,2,1,3,2,4,2,5,"Scenario A"  
449,2,1,2,2,3,2,1,1,2,3,2,1,5,4,"Scenario A"  
449,1,2,2,3,2,1,5,2,1,1,1,4,3,3,"Scenario B"  
449,2,2,1,1,2,4,5,1,2,2,2,3,1,1,"Scenario B"  
449,1,1,3,3,1,4,1,2,2,1,2,4,3,2,"Scenario A"  
449,2,1,2,1,4,2,3,1,1,3,3,1,5,3,"Scenario A"  
449,2,2,3,1,1,1,1,1,1,1,3,3,3,4,"Scenario A"  
449,1,2,1,2,3,2,4,2,1,2,2,2,5,3,"Scenario A"  
449,2,2,3,3,4,3,5,2,1,2,1,3,5,2,"Scenario A"  
449,1,2,1,1,2,4,5,2,1,3,3,4,2,4,"Scenario B"  
449,1,1,2,2,2,1,1,2,2,3,1,1,1,2,"Scenario B"  
450,1,2,2,2,4,3,2,1,1,1,3,3,4,3,"Scenario A"  
450,2,1,3,1,2,5,4,1,2,1,3,4,2,1,"Scenario B"  
450,1,1,1,3,1,4,5,2,2,2,2,2,3,5,"Scenario B"  
450,2,1,2,2,1,4,1,1,2,2,1,3,1,2,"Scenario B"  
450,1,1,3,2,2,2,3,2,2,3,3,1,2,4,"Scenario B"  
450,2,1,1,1,4,1,2,1,2,3,2,2,5,3,"Scenario A"  
450,2,1,1,2,1,4,4,1,2,3,1,3,3,5,"Scenario B"  
450,2,2,2,3,3,5,4,1,2,2,3,4,4,1,"Scenario B"  
450,1,1,2,1,4,3,5,2,1,1,2,3,5,1,"Scenario A"  
450,1,1,3,1,1,1,2,2,2,3,3,2,4,1,"Scenario B"  
448,2,1,2,3,1,3,1,1,2,1,1,1,2,2,"Scenario A"  
448,1,1,2,1,2,2,3,2,2,3,2,4,1,2,"Scenario B"  
448,2,1,3,2,3,5,5,1,2,1,3,4,4,4,"Scenario B"  
448,1,2,3,3,1,4,3,2,1,1,1,2,1,4,"Scenario A"  
448,1,1,2,1,4,5,5,2,2,1,2,3,4,1,"Scenario B"  
448,2,1,2,3,1,1,3,1,2,2,1,2,3,1,"Scenario B"  
448,1,2,1,2,1,3,4,2,1,3,3,3,5,1,"Scenario B"  
448,2,2,3,2,1,1,5,1,1,2,3,4,2,2,"Scenario B"  
448,2,2,3,1,2,4,2,1,1,1,2,2,2,5,"Scenario A"  
448,2,2,1,1,3,3,4,1,1,2,3,1,3,5,"Scenario B"  
447,1,1,3,3,3,1,2,1,2,2,3,2,2,5,"Scenario A"  
447,1,2,3,2,1,1,4,2,1,2,3,4,5,3,"Scenario A"  
447,2,2,1,2,3,4,2,1,1,3,1,1,4,5,"Scenario A"  
447,1,2,1,1,3,2,1,2,1,1,2,4,3,1,"Scenario A"  
447,1,2,2,2,2,3,2,2,2,3,1,4,5,1,"Scenario A"  
447,2,1,2,1,2,1,4,1,1,1,3,2,5,2,"Scenario B"  
447,2,1,1,3,1,2,1,1,2,3,2,4,3,4,"Scenario A"  
447,1,1,3,3,1,5,2,2,2,2,1,3,1,3,"Scenario B"  
447,1,1,2,2,3,3,3,2,2,3,1,2,4,5,"Scenario A"  
447,1,2,2,3,1,5,4,2,1,3,2,4,2,5,"Scenario B"  
405,2,1,2,2,3,2,1,1,2,3,2,1,5,4,"Scenario A"  
405,1,2,2,3,2,1,5,2,1,1,1,4,3,3,"Scenario B"  
405,2,2,1,1,2,4,5,1,2,2,2,3,1,1,"Scenario B"  
405,1,1,3,3,1,4,1,2,2,1,2,4,3,2,"Scenario A"  
405,2,1,2,1,4,2,3,1,1,3,3,1,5,3,"Scenario B"  
405,2,2,3,1,1,1,1,1,1,1,3,3,3,4,"Scenario A"  
405,1,2,1,2,3,2,4,2,1,2,2,2,5,3,"Scenario A"  
405,2,2,3,3,4,3,5,2,1,2,1,3,5,2,"Scenario A"  
405,1,2,1,1,2,4,5,2,1,3,3,4,2,4,"Scenario B"  
405,1,1,2,2,2,1,1,2,2,3,1,1,1,2,"Scenario A"  
453,1,2,2,2,4,3,2,1,1,1,3,3,4,3,"Scenario A"  
453,2,1,3,1,2,5,4,1,2,1,3,4,2,1,"Scenario B"  
453,1,1,1,3,1,4,5,2,2,2,2,2,3,5,"Scenario B"

453,2,1,2,2,1,4,1,1,2,2,1,3,1,2,"Scenario A"  
453,1,1,3,2,2,2,3,2,2,3,3,1,2,4,"Scenario A"  
453,2,1,1,1,4,1,2,1,2,3,2,2,5,3,"Scenario A"  
453,2,1,1,2,1,4,4,1,2,3,1,3,3,5,"Scenario A"  
453,2,2,2,3,3,5,4,1,2,2,3,4,4,1,"Scenario B"  
453,1,1,2,1,4,3,5,2,1,1,2,3,5,1,"Scenario B"  
453,1,1,3,1,1,1,2,2,2,3,3,2,4,1,"Scenario B"  
443,2,1,2,3,1,3,1,1,2,1,1,1,2,2,"Scenario A"  
443,1,1,2,1,2,2,3,2,2,3,2,4,1,2,"Scenario B"  
443,2,1,3,2,3,5,5,1,2,1,3,4,4,4,"Scenario B"  
443,1,2,3,3,1,4,3,2,1,1,1,2,1,4,"Scenario A"  
443,1,1,2,1,4,5,5,2,2,1,2,3,4,1,"Scenario B"  
443,2,1,2,3,1,1,3,1,2,2,1,2,3,1,"Scenario B"  
443,1,2,1,2,1,3,4,2,1,3,3,3,5,1,"Scenario A"  
443,2,2,3,2,1,1,5,1,1,2,3,4,2,2,"Scenario B"  
443,2,2,3,1,2,4,2,1,1,1,2,2,2,5,"Scenario A"  
443,2,2,1,1,3,3,4,1,1,2,3,1,3,5,"Scenario A"  
3,1,1,3,3,3,1,2,1,2,2,3,2,2,5,"Scenario A"  
3,1,2,3,2,1,1,4,2,1,2,3,4,5,3,"Scenario A"  
3,2,2,1,2,3,4,2,1,1,3,1,1,4,5,"Scenario B"  
3,1,2,1,1,3,2,1,2,1,1,2,4,3,1,"Scenario A"  
3,1,2,2,2,2,3,2,2,2,3,1,4,5,1,"Scenario A"  
3,2,1,2,1,2,1,4,1,1,1,3,2,5,2,"Scenario B"  
3,2,1,1,3,1,2,1,1,2,3,2,4,3,4,"Scenario A"  
3,1,1,3,3,1,5,2,2,2,2,1,3,1,3,"Scenario A"  
3,1,1,2,2,3,3,3,2,2,3,1,2,4,5,"Scenario A"  
3,1,2,2,3,1,5,4,2,1,3,2,4,2,5,"Scenario A"  
81,2,1,2,2,3,2,1,1,2,3,2,1,5,4,"Scenario B"  
81,1,2,2,3,2,1,5,2,1,1,1,4,3,3,"Scenario A"  
81,2,2,1,1,2,4,5,1,2,2,2,3,1,1,"Scenario A"  
81,1,1,3,3,1,4,1,2,2,1,2,4,3,2,"Scenario B"  
81,2,1,2,1,4,2,3,1,1,3,3,1,5,3,"Scenario A"  
81,2,2,3,1,1,1,1,1,1,1,3,3,3,4,"Scenario A"  
81,1,2,1,2,3,2,4,2,1,2,2,2,5,3,"Scenario A"  
81,2,2,3,3,4,3,5,2,1,2,1,3,5,2,"Scenario A"  
81,1,2,1,1,2,4,5,2,1,3,3,4,2,4,"Scenario B"  
81,1,1,2,2,2,1,1,2,2,3,1,1,1,2,"Scenario B"  
317,1,2,2,2,4,3,2,1,1,1,3,3,4,3,"Scenario A"  
317,2,1,3,1,2,5,4,1,2,1,3,4,2,1,"Scenario B"  
317,1,1,1,3,1,4,5,2,2,2,2,2,3,5,"Scenario B"  
317,2,1,2,2,1,4,1,1,2,2,1,3,1,2,"Scenario A"  
317,1,1,3,2,2,2,3,2,2,3,3,1,2,4,"Scenario A"  
317,2,1,1,1,4,1,2,1,2,3,2,2,5,3,"Scenario A"  
317,2,1,1,2,1,4,4,1,2,3,1,3,3,5,"Scenario B"  
317,2,2,2,3,3,5,4,1,2,2,3,4,4,1,"Scenario B"  
317,1,1,2,1,4,3,5,2,1,1,2,3,5,1,"Scenario B"  
317,1,1,3,1,1,1,2,2,2,3,3,2,4,1,"Scenario B"  
322,2,1,2,3,1,3,1,1,2,1,1,1,2,2,"Scenario A"  
322,1,1,2,1,2,2,3,2,2,3,2,4,1,2,"Scenario A"  
322,2,1,3,2,3,5,5,1,2,1,3,4,4,4,"Scenario A"  
322,1,2,3,3,1,4,3,2,1,1,1,2,1,4,"Scenario B"  
322,1,1,2,1,4,5,5,2,2,1,2,3,4,1,"Scenario A"  
322,2,1,2,3,1,1,3,1,2,2,1,2,3,1,"Scenario B"  
322,1,2,1,2,1,3,4,2,1,3,3,3,5,1,"Scenario B"  
322,2,2,3,2,1,1,5,1,1,2,3,4,2,2,"Scenario B"  
322,2,2,3,1,2,4,2,1,1,1,2,2,2,5,"Scenario A"  
322,2,2,1,1,3,3,4,1,1,2,3,1,3,5,"Scenario A"



321,1,1,3,3,3,1,2,1,2,2,3,2,2,5,"Scenario A"  
321,1,2,3,2,1,1,4,2,1,2,3,4,5,3,"Scenario A"  
321,2,2,1,2,3,4,2,1,1,3,1,1,4,5,"Scenario B"  
321,1,2,1,1,3,2,1,2,1,1,2,4,3,1,"Scenario A"  
321,1,2,2,2,2,3,2,2,2,3,1,4,5,1,"Scenario A"  
321,2,1,2,1,2,1,4,1,1,1,3,2,5,2,"Scenario B"  
321,2,1,1,3,1,2,1,1,2,3,2,4,3,4,"Scenario A"  
321,1,1,3,3,1,5,2,2,2,2,1,3,1,3,"Scenario B"  
321,1,1,2,2,3,3,3,2,2,3,1,2,4,5,"Scenario A"  
321,1,2,2,3,1,5,4,2,1,3,2,4,2,5,"Scenario B"  
1,2,1,2,2,3,2,1,1,2,3,2,1,5,4,"Scenario A"  
1,1,2,2,3,2,1,5,2,1,1,1,4,3,3,"Scenario B"  
1,2,2,1,1,2,4,5,1,2,2,2,3,1,1,"Scenario B"  
1,1,1,3,3,1,4,1,2,2,1,2,4,3,2,"Scenario A"  
1,2,1,2,1,4,2,3,1,1,3,3,1,5,3,"Scenario B"  
1,2,2,3,1,1,1,1,1,1,1,3,3,3,4,"Scenario A"  
1,1,2,1,2,3,2,4,2,1,2,2,2,5,3,"Scenario B"  
1,2,2,3,3,4,3,5,2,1,2,1,3,5,2,"Scenario B"  
1,1,2,1,1,2,4,5,2,1,3,3,4,2,4,"Scenario B"  
1,1,1,2,2,2,1,1,2,2,3,1,1,1,2,"Scenario A"  
324,1,2,2,2,4,3,2,1,1,1,3,3,4,3,"Scenario A"  
324,2,1,3,1,2,5,4,1,2,1,3,4,2,1,"Scenario B"  
324,1,1,1,3,1,4,5,2,2,2,2,2,3,5,"Scenario B"  
324,2,1,2,2,1,4,1,1,2,2,1,3,1,2,"Scenario A"  
324,1,1,3,2,2,2,3,2,2,3,3,1,2,4,"Scenario A"  
324,2,1,1,1,4,1,2,1,2,3,2,2,5,3,"Scenario A"  
324,2,1,1,2,1,4,4,1,2,3,1,3,3,5,"Scenario B"  
324,2,2,2,3,3,5,4,1,2,2,3,4,4,1,"Scenario B"  
324,1,1,2,1,4,3,5,2,1,1,2,3,5,1,"Scenario B"  
324,1,1,3,1,1,1,2,2,2,3,3,2,4,1,"Scenario B"  
323,2,1,2,3,1,3,1,1,2,1,1,1,2,2,"Scenario A"  
323,1,1,2,1,2,2,3,2,2,3,2,4,1,2,"Scenario A"  
323,2,1,3,2,3,5,5,1,2,1,3,4,4,4,"Scenario A"  
323,1,2,3,3,1,4,3,2,1,1,1,2,1,4,"Scenario B"  
323,1,1,2,1,4,5,5,2,2,1,2,3,4,1,"Scenario A"  
323,2,1,2,3,1,1,3,1,2,2,1,2,3,1,"Scenario B"  
323,1,2,1,2,1,3,4,2,1,3,3,3,5,1,"Scenario B"  
323,2,2,3,2,1,1,5,1,1,2,3,4,2,2,"Scenario B"  
323,2,2,3,1,2,4,2,1,1,1,2,2,2,5,"Scenario A"  
323,2,2,1,1,3,3,4,1,1,2,3,1,3,5,"Scenario A"  
325,1,1,3,3,3,1,2,1,2,2,3,2,2,5,"Scenario A"  
325,1,2,3,2,1,1,4,2,1,2,3,4,5,3,"Scenario A"  
325,2,2,1,2,3,4,2,1,1,3,1,1,4,5,"Scenario B"  
325,1,2,1,1,3,2,1,2,1,1,2,4,3,1,"Scenario A"  
325,1,2,2,2,2,3,2,2,2,3,1,4,5,1,"Scenario A"  
325,2,1,2,1,2,1,4,1,1,1,3,2,5,2,"Scenario B"  
325,2,1,1,3,1,2,1,1,2,3,2,4,3,4,"Scenario A"  
325,1,1,3,3,1,5,2,2,2,2,1,3,1,3,"Scenario B"  
325,1,1,2,2,3,3,3,2,2,3,1,2,4,5,"Scenario A"  
325,1,2,2,3,1,5,4,2,1,3,2,4,2,5,"Scenario B"  
2,2,1,2,2,3,2,1,1,2,3,2,1,5,4,"Scenario B"  
2,1,2,2,3,2,1,5,2,1,1,1,4,3,3,"Scenario A"  
2,2,2,1,1,2,4,5,1,2,2,2,3,1,1,"Scenario B"  
2,1,1,3,3,1,4,1,2,2,1,2,4,3,2,"Scenario A"  
2,2,1,2,1,4,2,3,1,1,3,3,1,5,3,"Scenario B"  
2,2,2,3,1,1,1,1,1,1,1,3,3,3,4,"Scenario A"  
2,1,2,1,2,3,2,4,2,1,2,2,2,5,3,"Scenario A"

2,2,2,3,3,4,3,5,2,1,2,1,3,5,2,"Scenario A"  
2,1,2,1,1,2,4,5,2,1,3,3,4,2,4,"Scenario B"  
2,1,1,2,2,2,1,1,2,2,3,1,1,1,2,"Scenario B"  
313,1,2,2,2,4,3,2,1,1,1,3,3,4,3,"Scenario A"  
313,2,1,3,1,2,5,4,1,2,1,3,4,2,1,"Scenario B"  
313,1,1,1,3,1,4,5,2,2,2,2,2,3,5,"Scenario B"  
313,2,1,2,2,1,4,1,1,2,2,1,3,1,2,"Scenario A"  
313,1,1,3,2,2,2,3,2,2,3,3,1,2,4,"Scenario A"  
313,2,1,1,1,4,1,2,1,2,3,2,2,5,3,"Scenario A"  
313,2,1,1,2,1,4,4,1,2,3,1,3,3,5,"Scenario B"  
313,2,2,2,3,3,5,4,1,2,2,3,4,4,1,"Scenario B"  
313,1,1,2,1,4,3,5,2,1,1,2,3,5,1,"Scenario B"  
313,1,1,3,1,1,1,2,2,2,3,3,2,4,1,"Scenario B"  
318,2,1,2,3,1,3,1,1,2,1,1,1,2,2,"Scenario A"  
318,1,1,2,1,2,2,3,2,2,3,2,4,1,2,"Scenario A"  
318,2,1,3,2,3,5,5,1,2,1,3,4,4,4,"Scenario A"  
318,1,2,3,3,1,4,3,2,1,1,1,2,1,4,"Scenario B"  
318,1,1,2,1,4,5,5,2,2,1,2,3,4,1,"Scenario A"  
318,2,1,2,3,1,1,3,1,2,2,1,2,3,1,"Scenario B"  
318,1,2,1,2,1,3,4,2,1,3,3,3,5,1,"Scenario B"  
318,2,2,3,2,1,1,5,1,1,2,3,4,2,2,"Scenario B"  
318,2,2,3,1,2,4,2,1,1,1,2,2,2,5,"Scenario A"  
318,2,2,1,1,3,3,4,1,1,2,3,1,3,5,"Scenario A"  
319,1,1,3,3,3,1,2,1,2,2,3,2,2,5,"Scenario A"  
319,1,2,3,2,1,1,4,2,1,2,3,4,5,3,"Scenario A"  
319,2,2,1,2,3,4,2,1,1,3,1,1,4,5,"Scenario B"  
319,1,2,1,1,3,2,1,2,1,1,2,4,3,1,"Scenario A"  
319,1,2,2,2,2,3,2,2,2,3,1,4,5,1,"Scenario A"  
319,2,1,2,1,2,1,4,1,1,1,3,2,5,2,"Scenario B"  
319,2,1,1,3,1,2,1,1,2,3,2,4,3,4,"Scenario A"  
319,1,1,3,3,1,5,2,2,2,2,1,3,1,3,"Scenario B"  
319,1,1,2,2,3,3,3,2,2,3,1,2,4,5,"Scenario A"  
319,1,2,2,3,1,5,4,2,1,3,2,4,2,5,"Scenario B"  
326,2,1,2,2,3,2,1,1,2,3,2,1,5,4,"Scenario B"  
326,1,2,2,3,2,1,5,2,1,1,1,4,3,3,"Scenario A"  
326,2,2,1,1,2,4,5,1,2,2,2,3,1,1,"Scenario B"  
326,1,1,3,3,1,4,1,2,2,1,2,4,3,2,"Scenario A"  
326,2,1,2,1,4,2,3,1,1,3,3,1,5,3,"Scenario B"  
326,2,2,3,1,1,1,1,1,1,1,3,3,3,4,"Scenario A"  
326,1,2,1,2,3,2,4,2,1,2,2,2,5,3,"Scenario B"  
326,2,2,3,3,4,3,5,2,1,2,1,3,5,2,"Scenario A"  
326,1,2,1,1,2,4,5,2,1,3,3,4,2,4,"Scenario B"  
326,1,1,2,2,2,1,1,2,2,3,1,1,1,2,"Scenario B"  
307,1,2,2,2,4,3,2,1,1,1,3,3,4,3,"Scenario A"  
307,2,1,3,1,2,5,4,1,2,1,3,4,2,1,"Scenario B"  
307,1,1,1,3,1,4,5,2,2,2,2,2,3,5,"Scenario B"  
307,2,1,2,2,1,4,1,1,2,2,1,3,1,2,"Scenario A"  
307,1,1,3,2,2,2,3,2,2,3,3,1,2,4,"Scenario A"  
307,2,1,1,1,4,1,2,1,2,3,2,2,5,3,"Scenario A"  
307,2,1,1,2,1,4,4,1,2,3,1,3,3,5,"Scenario B"  
307,2,2,2,3,3,5,4,1,2,2,3,4,4,1,"Scenario B"  
307,1,1,2,1,4,3,5,2,1,1,2,3,5,1,"Scenario B"  
307,1,1,3,1,1,1,2,2,2,3,3,2,4,1,"Scenario B"  
278,2,1,2,3,1,3,1,1,2,1,1,1,2,2,"Scenario A"  
278,1,1,2,1,2,2,3,2,2,3,2,4,1,2,"Scenario B"  
278,2,1,3,2,3,5,5,1,2,1,3,4,4,4,"Scenario A"  
278,1,2,3,3,1,4,3,2,1,1,1,2,1,4,"Scenario A"

278,1,1,2,1,4,5,5,2,2,1,2,3,4,1,"Scenario B"  
278,2,1,2,3,1,1,3,1,2,2,1,2,3,1,"Scenario A"  
278,1,2,1,2,1,3,4,2,1,3,3,3,5,1,"Scenario B"  
278,2,2,3,2,1,1,5,1,1,2,3,4,2,2,"Scenario B"  
278,2,2,3,1,2,4,2,1,1,1,2,2,2,5,"Scenario A"  
278,2,2,1,1,3,3,4,1,1,2,3,1,3,5,"Scenario B"  
283,1,1,3,3,3,1,2,1,2,2,3,2,2,5,"Scenario B"  
283,1,2,3,2,1,1,4,2,1,2,3,4,5,3,"Scenario A"  
283,2,2,1,2,3,4,2,1,1,3,1,1,4,5,"Scenario A"  
283,1,2,1,1,3,2,1,2,1,1,2,4,3,1,"Scenario A"  
283,1,2,2,2,2,3,2,2,2,3,1,4,5,1,"Scenario A"  
283,2,1,2,1,2,1,4,1,1,1,1,3,2,5,2,"Scenario A"  
283,2,1,1,3,1,2,1,1,1,2,3,2,4,3,4,"Scenario B"  
283,1,1,3,3,1,5,2,2,2,2,1,3,1,3,"Scenario B"  
283,1,1,2,2,3,3,3,2,2,3,1,2,4,5,"Scenario A"  
283,1,2,2,3,1,5,4,2,1,3,2,4,2,5,"Scenario B"  
279,2,1,2,2,3,2,1,1,2,3,2,1,5,4,"Scenario B"  
279,1,2,2,3,2,1,5,2,1,1,1,4,3,3,"Scenario A"  
279,2,2,1,1,2,4,5,1,2,2,2,3,1,1,"Scenario B"  
279,1,1,3,3,1,4,1,2,2,1,2,4,3,2,"Scenario B"  
279,2,1,2,1,4,2,3,1,1,3,3,1,5,3,"Scenario B"  
279,2,2,3,1,1,1,1,1,1,1,3,3,3,4,"Scenario A"  
279,1,2,1,2,3,2,4,2,1,2,2,2,5,3,"Scenario B"  
279,2,2,3,3,4,3,5,2,1,2,1,3,5,2,"Scenario A"  
279,1,2,1,1,2,4,5,2,1,3,3,4,2,4,"Scenario B"  
279,1,1,2,2,2,1,1,2,2,3,1,1,1,2,"Scenario B"  
329,1,2,2,2,4,3,2,1,1,1,3,3,4,3,"Scenario A"  
329,2,1,3,1,2,5,4,1,2,1,3,4,2,1,"Scenario B"  
329,1,1,1,3,1,4,5,2,2,2,2,2,3,5,"Scenario B"  
329,2,1,2,2,1,4,1,1,2,2,1,3,1,2,"Scenario B"  
329,1,1,3,2,2,2,3,2,2,3,3,1,2,4,"Scenario B"  
329,2,1,1,1,4,1,2,1,2,3,2,2,5,3,"Scenario B"  
329,2,1,1,2,1,4,4,1,2,3,1,3,3,5,"Scenario B"  
329,2,2,2,3,3,5,4,1,2,2,3,4,4,1,"Scenario B"  
329,1,1,2,1,4,3,5,2,1,1,2,3,5,1,"Scenario B"  
329,1,1,3,1,1,1,2,2,2,3,3,2,4,1,"Scenario B"  
332,2,1,2,3,1,3,1,1,2,1,1,1,2,2,"Scenario A"  
332,1,1,2,1,2,2,3,2,2,3,2,4,1,2,"Scenario B"  
332,2,1,3,2,3,5,5,1,2,1,3,4,4,4,"Scenario A"  
332,1,2,3,3,1,4,3,2,1,1,1,2,1,4,"Scenario A"  
332,1,1,2,1,4,5,5,2,2,1,2,3,4,1,"Scenario A"  
332,2,1,2,3,1,1,3,1,2,2,1,2,3,1,"Scenario A"  
332,1,2,1,2,1,3,4,2,1,3,3,3,5,1,"Scenario A"  
332,2,2,3,2,1,1,5,1,1,2,3,4,2,2,"Scenario B"  
332,2,2,3,1,2,4,2,1,1,1,2,2,2,5,"Scenario B"  
332,2,2,1,1,3,3,4,1,1,2,3,1,3,5,"Scenario B"  
337,1,1,3,3,3,1,2,1,2,2,3,2,2,5,"Scenario A"  
337,1,2,3,2,1,1,4,2,1,2,3,4,5,3,"Scenario A"  
337,2,2,1,2,3,4,2,1,1,3,1,1,4,5,"Scenario A"  
337,1,2,1,1,3,2,1,2,1,1,2,4,3,1,"Scenario A"  
337,1,2,2,2,2,3,2,2,2,3,1,4,5,1,"Scenario B"  
337,2,1,2,1,2,1,4,1,1,1,3,2,5,2,"Scenario A"  
337,2,1,1,3,1,2,1,1,2,3,2,4,3,4,"Scenario A"  
337,1,1,3,3,1,5,2,2,2,2,1,3,1,3,"Scenario B"  
337,1,1,2,2,3,3,3,2,2,3,1,2,4,5,"Scenario A"  
337,1,2,2,3,1,5,4,2,1,3,2,4,2,5,"Scenario A"  
336,2,1,2,2,3,2,1,1,2,3,2,1,5,4,"Scenario A"

336,1,2,2,3,2,1,5,2,1,1,1,4,3,3,"Scenario B"  
336,2,2,1,1,2,4,5,1,2,2,2,3,1,1,"Scenario B"  
336,1,1,3,3,1,4,1,2,2,1,2,4,3,2,"Scenario A"  
336,2,1,2,1,4,2,3,1,1,3,3,1,5,3,"Scenario A"  
336,2,2,3,1,1,1,1,1,1,1,3,3,3,4,"Scenario A"  
336,1,2,1,2,3,2,4,2,1,2,2,2,5,3,"Scenario A"  
336,2,2,3,3,4,3,5,2,1,2,1,3,5,2,"Scenario B"  
336,1,2,1,1,2,4,5,2,1,3,3,4,2,4,"Scenario B"  
336,1,1,2,2,2,1,1,2,2,3,1,1,1,2,"Scenario A"  
335,1,2,2,2,4,3,2,1,1,1,3,3,4,3,"Scenario A"  
335,2,1,3,1,2,5,4,1,2,1,3,4,2,1,"Scenario B"  
335,1,1,1,3,1,4,5,2,2,2,2,2,3,5,"Scenario B"  
335,2,1,2,2,1,4,1,1,2,2,1,3,1,2,"Scenario B"  
335,1,1,3,2,2,2,3,2,2,3,3,1,2,4,"Scenario A"  
335,2,1,1,1,4,1,2,1,2,3,2,2,5,3,"Scenario A"  
335,2,1,1,2,1,4,4,1,2,3,1,3,3,5,"Scenario A"  
335,2,2,2,3,3,5,4,1,2,2,3,4,4,1,"Scenario B"  
335,1,1,2,1,4,3,5,2,1,1,2,3,5,1,"Scenario B"  
335,1,1,3,1,1,1,2,2,2,3,3,2,4,1,"Scenario B"  
333,2,1,2,3,1,3,1,1,2,1,1,1,2,2,"Scenario A"  
333,1,1,2,1,2,2,3,2,2,3,2,4,1,2,"Scenario B"  
333,2,1,3,2,3,5,5,1,2,1,3,4,4,4,"Scenario B"  
333,1,2,3,3,1,4,3,2,1,1,1,2,1,4,"Scenario B"  
333,1,1,2,1,4,5,5,2,2,1,2,3,4,1,"Scenario A"  
333,2,1,2,3,1,1,3,1,2,2,1,2,3,1,"Scenario A"  
333,1,2,1,2,1,3,4,2,1,3,3,3,5,1,"Scenario A"  
333,2,2,3,2,1,1,5,1,1,2,3,4,2,2,"Scenario A"  
333,2,2,3,1,2,4,2,1,1,1,2,2,2,5,"Scenario A"  
333,2,2,1,1,3,3,4,1,1,2,3,1,3,5,"Scenario A"  
334,1,1,3,3,3,1,2,1,2,2,3,2,2,5,"Scenario A"  
334,1,2,3,2,1,1,4,2,1,2,3,4,5,3,"Scenario A"  
334,2,2,1,2,3,4,2,1,1,3,1,1,4,5,"Scenario B"  
334,1,2,1,1,3,2,1,2,1,1,2,4,3,1,"Scenario B"  
334,1,2,2,2,2,3,2,2,2,3,1,4,5,1,"Scenario B"  
334,2,1,2,1,2,1,4,1,1,1,3,2,5,2,"Scenario A"  
334,2,1,1,3,1,2,1,1,2,3,2,4,3,4,"Scenario A"  
334,1,1,3,3,1,5,2,2,2,2,1,3,1,3,"Scenario B"  
334,1,1,2,2,3,3,3,2,2,3,1,2,4,5,"Scenario B"  
334,1,2,2,3,1,5,4,2,1,3,2,4,2,5,"Scenario B"  
282,2,1,2,2,3,2,1,1,2,3,2,1,5,4,"Scenario B"  
282,1,2,2,3,2,1,5,2,1,1,1,4,3,3,"Scenario B"  
282,2,2,1,1,2,4,5,1,2,2,2,3,1,1,"Scenario A"  
282,1,1,3,3,1,4,1,2,2,1,2,4,3,2,"Scenario B"  
282,2,1,2,1,4,2,3,1,1,3,3,1,5,3,"Scenario B"  
282,2,2,3,1,1,1,1,1,1,1,3,3,3,4,"Scenario A"  
282,1,2,1,2,3,2,4,2,1,2,2,2,5,3,"Scenario A"  
282,2,2,3,3,4,3,5,2,1,2,1,3,5,2,"Scenario B"  
282,1,2,1,1,2,4,5,2,1,3,3,4,2,4,"Scenario B"  
282,1,1,2,2,2,1,1,2,2,3,1,1,1,2,"Scenario B"  
276,1,2,2,2,4,3,2,1,1,1,3,3,4,3,"Scenario B"  
276,2,1,3,1,2,5,4,1,2,1,3,4,2,1,"Scenario B"  
276,1,1,1,3,1,4,5,2,2,2,2,2,3,5,"Scenario A"  
276,2,1,2,2,1,4,1,1,2,2,1,3,1,2,"Scenario B"  
276,1,1,3,2,2,2,3,2,2,3,3,1,2,4,"Scenario A"  
276,2,1,1,1,4,1,2,1,2,3,2,2,5,3,"Scenario A"  
276,2,1,1,2,1,4,4,1,2,3,1,3,3,5,"Scenario A"  
276,2,2,2,3,3,5,4,1,2,2,3,4,4,1,"Scenario B"

276,1,1,2,1,4,3,5,2,1,1,2,3,5,1,"Scenario B"  
276,1,1,3,1,1,1,2,2,2,3,3,2,4,1,"Scenario B"  
284,2,1,2,3,1,3,1,1,2,1,1,1,2,2,"Scenario A"  
284,1,1,2,1,2,2,3,2,2,3,2,4,1,2,"Scenario A"  
284,2,1,3,2,3,5,5,1,2,1,3,4,4,4,"Scenario A"  
284,1,2,3,3,1,4,3,2,1,1,1,2,1,4,"Scenario A"  
284,1,1,2,1,4,5,5,2,2,1,2,3,4,1,"Scenario B"  
284,2,1,2,3,1,1,3,1,2,2,1,2,3,1,"Scenario B"  
284,1,2,1,2,1,3,4,2,1,3,3,3,5,1,"Scenario A"  
284,2,2,3,2,1,1,5,1,1,2,3,4,2,2,"Scenario B"  
284,2,2,3,1,2,4,2,1,1,1,2,2,2,5,"Scenario A"  
284,2,2,1,1,3,3,4,1,1,2,3,1,3,5,"Scenario B"  
275,1,1,3,3,3,1,2,1,2,2,3,2,2,5,"Scenario B"  
275,1,2,3,2,1,1,4,2,1,2,3,4,5,3,"Scenario B"  
275,2,2,1,2,3,4,2,1,1,3,1,1,4,5,"Scenario B"  
275,1,2,1,1,3,2,1,2,1,1,2,4,3,1,"Scenario A"  
275,1,2,2,2,2,3,2,2,2,3,1,4,5,1,"Scenario A"  
275,2,1,2,1,2,1,4,1,1,1,3,2,5,2,"Scenario B"  
275,2,1,1,3,1,2,1,1,2,3,2,4,3,4,"Scenario A"  
275,1,1,3,3,1,5,2,2,2,2,1,3,1,3,"Scenario A"  
275,1,1,2,2,3,3,3,2,2,3,1,2,4,5,"Scenario B"  
275,1,2,2,3,1,5,4,2,1,3,2,4,2,5,"Scenario A"  
274,2,1,2,2,3,2,1,1,2,3,2,1,5,4,"Scenario A"  
274,1,2,2,3,2,1,5,2,1,1,1,4,3,3,"Scenario A"  
274,2,2,1,1,2,4,5,1,2,2,2,3,1,1,"Scenario A"  
274,1,1,3,3,1,4,1,2,2,1,2,4,3,2,"Scenario A"  
274,2,1,2,1,4,2,3,1,1,3,3,1,5,3,"Scenario B"  
274,2,2,3,1,1,1,1,1,1,1,3,3,3,4,"Scenario A"  
274,1,2,1,2,3,2,4,2,1,2,2,2,5,3,"Scenario B"  
274,2,2,3,3,4,3,5,2,1,2,1,3,5,2,"Scenario B"  
274,1,2,1,1,2,4,5,2,1,3,3,4,2,4,"Scenario A"  
274,1,1,2,2,2,1,1,2,2,3,1,1,1,2,"Scenario B"  
331,1,2,2,2,4,3,2,1,1,1,3,3,4,3,"Scenario A"  
331,2,1,3,1,2,5,4,1,2,1,3,4,2,1,"Scenario B"  
331,1,1,1,3,1,4,5,2,2,2,2,2,3,5,"Scenario B"  
331,2,1,2,2,1,4,1,1,2,2,1,3,1,2,"Scenario A"  
331,1,1,3,2,2,2,3,2,2,3,3,1,2,4,"Scenario A"  
331,2,1,1,1,4,1,2,1,2,3,2,2,5,3,"Scenario A"  
331,2,1,1,2,1,4,4,1,2,3,1,3,3,5,"Scenario A"  
331,2,2,2,3,3,5,4,1,2,2,3,4,4,1,"Scenario B"  
331,1,1,2,1,4,3,5,2,1,1,2,3,5,1,"Scenario B"  
331,1,1,3,1,1,1,2,2,2,3,3,2,4,1,"Scenario B"  
330,2,1,2,3,1,3,1,1,2,1,1,1,2,2,"Scenario A"  
330,1,1,2,1,2,2,3,2,2,3,2,4,1,2,"Scenario B"  
330,2,1,3,2,3,5,5,1,2,1,3,4,4,4,"Scenario B"  
330,1,2,3,3,1,4,3,2,1,1,1,2,1,4,"Scenario B"  
330,1,1,2,1,4,5,5,2,2,1,2,3,4,1,"Scenario A"  
330,2,1,2,3,1,1,3,1,2,2,1,2,3,1,"Scenario B"  
330,1,2,1,2,1,1,3,4,2,1,3,3,3,5,1,"Scenario B"  
330,2,2,3,2,1,1,5,1,1,2,3,4,2,2,"Scenario A"  
330,2,2,3,1,2,4,2,1,1,1,2,2,2,5,"Scenario B"  
330,2,2,1,1,3,3,4,1,1,2,3,1,3,5,"Scenario B"  
281,1,1,3,3,3,1,2,1,2,2,3,2,2,5,"Scenario A"  
281,1,2,3,2,1,1,4,2,1,2,3,4,5,3,"Scenario A"  
281,2,2,1,2,3,4,2,1,1,3,1,1,4,5,"Scenario B"  
281,1,2,1,1,3,2,1,2,1,1,2,4,3,1,"Scenario A"  
281,1,2,2,2,2,3,2,2,2,3,1,4,5,1,"Scenario A"

281,2,1,2,1,2,1,4,1,1,1,3,2,5,2,"Scenario B"  
281,2,1,1,3,1,2,1,1,2,3,2,4,3,4,"Scenario B"  
281,1,1,3,3,1,5,2,2,2,2,1,3,1,3,"Scenario A"  
281,1,1,2,2,3,3,3,2,2,3,1,2,4,5,"Scenario A"  
281,1,2,2,3,1,5,4,2,1,3,2,4,2,5,"Scenario A"  
280,2,1,2,2,3,2,1,1,2,3,2,1,5,4,"Scenario B"  
280,1,2,2,3,2,1,5,2,1,1,1,4,3,3,"Scenario A"  
280,2,2,1,1,2,4,5,1,2,2,2,3,1,1,"Scenario B"  
280,1,1,3,3,1,4,1,2,2,1,2,4,3,2,"Scenario B"  
280,2,1,2,1,4,2,3,1,1,3,3,1,5,3,"Scenario B"  
280,2,2,3,1,1,1,1,1,1,1,3,3,3,4,"Scenario A"  
280,1,2,1,2,3,2,4,2,1,2,2,2,5,3,"Scenario A"  
280,2,2,3,3,4,3,5,2,1,2,1,3,5,2,"Scenario A"  
280,1,2,1,1,2,4,5,2,1,3,3,4,2,4,"Scenario A"  
280,1,1,2,2,2,1,1,2,2,3,1,1,1,2,"Scenario B"  
277,1,2,2,2,4,3,2,1,1,1,3,3,4,3,"Scenario A"  
277,2,1,3,1,2,5,4,1,2,1,3,4,2,1,"Scenario A"  
277,1,1,1,3,1,4,5,2,2,2,2,2,3,5,"Scenario A"  
277,2,1,2,2,1,4,1,1,2,2,1,3,1,2,"Scenario A"  
277,1,1,3,2,2,2,3,2,2,3,3,1,2,4,"Scenario B"  
277,2,1,1,1,4,1,2,1,2,3,2,2,5,3,"Scenario B"  
277,2,1,1,2,1,4,4,1,2,3,1,3,3,5,"Scenario A"  
277,2,2,2,3,3,5,4,1,2,2,3,4,4,1,"Scenario B"  
277,1,1,2,1,4,3,5,2,1,1,2,3,5,1,"Scenario A"  
277,1,1,3,1,1,1,2,2,2,3,3,2,4,1,"Scenario A"  
496,2,1,2,3,1,3,1,1,2,1,1,1,2,2,"Scenario A"  
496,1,1,2,1,2,2,3,2,2,3,2,4,1,2,"Scenario A"  
496,2,1,3,2,3,5,5,1,2,1,3,4,4,4,"Scenario A"  
496,1,2,3,3,1,4,3,2,1,1,1,2,1,4,"Scenario B"  
496,1,1,2,1,4,5,5,2,2,1,2,3,4,1,"Scenario A"  
496,2,1,2,3,1,1,3,1,2,2,1,2,3,1,"Scenario B"  
496,1,2,1,2,1,3,4,2,1,3,3,3,5,1,"Scenario B"  
496,2,2,3,2,1,1,5,1,1,2,3,4,2,2,"Scenario A"  
496,2,2,3,1,2,4,2,1,1,1,2,2,2,5,"Scenario B"  
496,2,2,1,1,3,3,4,1,1,2,3,1,3,5,"Scenario B"  
492,1,1,3,3,3,1,2,1,2,2,3,2,2,5,"Scenario A"  
492,1,2,3,2,1,1,4,2,1,2,3,4,5,3,"Scenario A"  
492,2,2,1,2,3,4,2,1,1,3,1,1,4,5,"Scenario B"  
492,1,2,1,1,3,2,1,2,1,1,2,4,3,1,"Scenario A"  
492,1,2,2,2,2,3,2,2,2,3,1,4,5,1,"Scenario B"  
492,2,1,2,1,2,1,4,1,1,1,3,2,5,2,"Scenario B"  
492,2,1,1,3,1,2,1,1,2,3,2,4,3,4,"Scenario A"  
492,1,1,3,3,1,5,2,2,2,2,1,3,1,3,"Scenario B"  
492,1,1,2,2,3,3,3,2,2,3,1,2,4,5,"Scenario A"  
492,1,2,2,3,1,5,4,2,1,3,2,4,2,5,"Scenario A"  
497,2,1,2,2,3,2,1,1,2,3,2,1,5,4,"Scenario B"  
497,1,2,2,3,2,1,5,2,1,1,1,4,3,3,"Scenario A"  
497,2,2,1,1,2,4,5,1,2,2,2,3,1,1,"Scenario A"  
497,1,1,3,3,1,4,1,2,2,1,2,4,3,2,"Scenario B"  
497,2,1,2,1,4,2,3,1,1,3,3,1,5,3,"Scenario A"  
497,2,2,3,1,1,1,1,1,1,1,3,3,3,4,"Scenario B"  
497,1,2,1,2,3,2,4,2,1,2,2,2,5,3,"Scenario B"  
497,2,2,3,3,4,3,5,2,1,2,1,3,5,2,"Scenario B"  
497,1,2,1,1,2,4,5,2,1,3,3,4,2,4,"Scenario A"  
497,1,1,2,2,2,1,1,2,2,3,1,1,1,2,"Scenario A"  
491,1,2,2,2,4,3,2,1,1,1,3,3,4,3,"Scenario A"  
491,2,1,3,1,2,5,4,1,2,1,3,4,2,1,"Scenario A"

491,1,1,1,3,1,4,5,2,2,2,2,2,3,5,"Scenario B"  
491,2,1,2,2,1,4,1,1,2,2,1,3,1,2,"Scenario A"  
491,1,1,3,2,2,2,3,2,2,3,3,1,2,4,"Scenario A"  
491,2,1,1,1,4,1,2,1,2,3,2,2,5,3,"Scenario B"  
491,2,1,1,2,1,4,4,1,2,3,1,3,3,5,"Scenario A"  
491,2,2,2,3,3,5,4,1,2,2,3,4,4,1,"Scenario B"  
491,1,1,2,1,4,3,5,2,1,1,2,3,5,1,"Scenario B"  
491,1,1,3,1,1,1,2,2,2,3,3,2,4,1,"Scenario A"  
495,2,1,2,3,1,3,1,1,2,1,1,1,2,2,"Scenario B"  
495,1,1,2,1,2,2,3,2,2,3,2,4,1,2,"Scenario B"  
495,2,1,3,2,3,5,5,1,2,1,3,4,4,4,"Scenario A"  
495,1,2,3,3,1,4,3,2,1,1,1,2,1,4,"Scenario B"  
495,1,1,2,1,4,5,5,2,2,1,2,3,4,1,"Scenario A"  
495,2,1,2,3,1,1,3,1,2,2,1,2,3,1,"Scenario A"  
495,1,2,1,2,1,3,4,2,1,3,3,3,5,1,"Scenario B"  
495,2,2,3,2,1,1,5,1,1,2,3,4,2,2,"Scenario A"  
495,2,2,3,1,2,4,2,1,1,1,2,2,2,5,"Scenario B"  
495,2,2,1,1,3,3,4,1,1,2,3,1,3,5,"Scenario B"  
96,1,1,3,3,3,1,2,1,2,2,3,2,2,5,"Scenario A"  
96,1,2,3,2,1,1,4,2,1,2,3,4,5,3,"Scenario B"  
96,2,2,1,2,3,4,2,1,1,3,1,1,4,5,"Scenario A"  
96,1,2,1,1,3,2,1,2,1,1,2,4,3,1,"Scenario B"  
96,1,2,2,2,2,3,2,2,2,3,1,4,5,1,"Scenario A"  
96,2,1,2,1,2,1,4,1,1,1,3,2,5,2,"Scenario B"  
96,2,1,1,3,1,2,1,1,2,3,2,4,3,4,"Scenario B"  
96,1,1,3,3,1,5,2,2,2,2,1,3,1,3,"Scenario B"  
96,1,1,2,2,3,3,3,2,2,3,1,2,4,5,"Scenario A"  
96,1,2,2,3,1,5,4,2,1,3,2,4,2,5,"Scenario A"  
97,2,1,2,2,3,2,1,1,2,3,2,1,5,4,"Scenario A"  
97,1,2,2,3,2,1,5,2,1,1,1,4,3,3,"Scenario B"  
97,2,2,1,1,2,4,5,1,2,2,2,3,1,1,"Scenario B"  
97,1,1,3,3,1,4,1,2,2,1,2,4,3,2,"Scenario A"  
97,2,1,2,1,4,2,3,1,1,3,3,1,5,3,"Scenario B"  
97,2,2,3,1,1,1,1,1,1,1,3,3,3,4,"Scenario A"  
97,1,2,1,2,3,2,4,2,1,2,2,2,5,3,"Scenario B"  
97,2,2,3,3,4,3,5,2,1,2,1,3,5,2,"Scenario B"  
97,1,2,1,1,2,4,5,2,1,3,3,4,2,4,"Scenario B"  
97,1,1,2,2,2,1,1,2,2,3,1,1,1,2,"Scenario A"  
98,1,2,2,2,4,3,2,1,1,1,3,3,4,3,"Scenario A"  
98,2,1,3,1,2,5,4,1,2,1,3,4,2,1,"Scenario B"  
98,1,1,1,3,1,4,5,2,2,2,2,2,3,5,"Scenario B"  
98,2,1,2,2,1,4,1,1,2,2,1,3,1,2,"Scenario A"  
98,1,1,3,2,2,2,3,2,2,3,3,1,2,4,"Scenario B"  
98,2,1,1,1,4,1,2,1,2,3,2,2,5,3,"Scenario B"  
98,2,1,1,2,1,4,4,1,2,3,1,3,3,5,"Scenario B"  
98,2,2,2,3,3,5,4,1,2,2,3,4,4,1,"Scenario A"  
98,1,1,2,1,4,3,5,2,1,1,2,3,5,1,"Scenario A"  
98,1,1,3,1,1,1,1,2,2,2,3,3,2,4,1,"Scenario B"  
99,2,1,2,3,1,3,1,1,2,1,1,1,2,2,"Scenario A"  
99,1,1,2,1,2,2,3,2,2,3,2,4,1,2,"Scenario B"  
99,2,1,3,2,3,5,5,1,2,1,3,4,4,4,"Scenario A"  
99,1,2,3,3,1,4,3,2,1,1,1,2,1,4,"Scenario A"  
99,1,1,2,1,4,5,5,2,2,1,2,3,4,1,"Scenario B"  
99,2,1,2,3,1,1,3,1,2,2,1,2,3,1,"Scenario B"  
99,1,2,1,2,1,3,4,2,1,3,3,3,5,1,"Scenario B"  
99,2,2,3,2,1,1,5,1,1,2,3,4,2,2,"Scenario A"  
99,2,2,3,1,2,4,2,1,1,1,2,2,2,5,"Scenario A"

99,2,2,1,1,3,3,4,1,1,2,3,1,3,5,"Scenario B"  
100,1,1,3,3,3,1,2,1,2,2,3,2,2,5,"Scenario B"  
100,1,2,3,2,1,1,4,2,1,2,3,4,5,3,"Scenario A"  
100,2,2,1,2,3,4,2,1,1,3,1,1,4,5,"Scenario A"  
100,1,2,1,1,3,2,1,2,1,1,2,4,3,1,"Scenario B"  
100,1,2,2,2,2,3,2,2,2,3,1,4,5,1,"Scenario B"  
100,2,1,2,1,2,1,4,1,1,1,3,2,5,2,"Scenario B"  
100,2,1,1,3,1,2,1,1,2,3,2,4,3,4,"Scenario A"  
100,1,1,3,3,1,5,2,2,2,2,1,3,1,3,"Scenario A"  
100,1,1,2,2,3,3,3,2,2,3,1,2,4,5,"Scenario A"  
100,1,2,2,3,1,5,4,2,1,3,2,4,2,5,"Scenario A"  
101,2,1,2,2,3,2,1,1,2,3,2,1,5,4,"Scenario A"  
101,1,2,2,3,2,1,5,2,1,1,1,4,3,3,"Scenario A"  
101,2,2,1,1,2,4,5,1,2,2,2,3,1,1,"Scenario B"  
101,1,1,3,3,1,4,1,2,2,1,2,4,3,2,"Scenario B"  
101,2,1,2,1,4,2,3,1,1,3,3,1,5,3,"Scenario A"  
101,2,2,3,1,1,1,1,1,1,1,3,3,3,4,"Scenario A"  
101,1,2,1,2,3,2,4,2,1,2,2,2,5,3,"Scenario A"  
101,2,2,3,3,4,3,5,2,1,2,1,3,5,2,"Scenario A"  
101,1,2,1,1,2,4,5,2,1,3,3,4,2,4,"Scenario B"  
101,1,1,2,2,2,1,1,2,2,3,1,1,1,2,"Scenario B"  
102,1,2,2,2,4,3,2,1,1,1,3,3,4,3,"Scenario A"  
102,2,1,3,1,2,5,4,1,2,1,3,4,2,1,"Scenario A"  
102,1,1,1,3,1,4,5,2,2,2,2,2,3,5,"Scenario A"  
102,2,1,2,2,1,4,1,1,2,2,1,3,1,2,"Scenario A"  
102,1,1,3,2,2,2,3,2,2,3,3,1,2,4,"Scenario A"  
102,2,1,1,1,4,1,2,1,2,3,2,2,5,3,"Scenario A"  
102,2,1,1,2,1,4,4,1,2,3,1,3,3,5,"Scenario A"  
102,2,2,2,3,3,5,4,1,2,2,3,4,4,1,"Scenario B"  
102,1,1,2,1,4,3,5,2,1,1,2,3,5,1,"Scenario B"  
102,1,1,3,1,1,1,2,2,2,3,3,2,4,1,"Scenario B"  
103,2,1,2,3,1,3,1,1,2,1,1,1,2,2,"Scenario A"  
103,1,1,2,1,2,2,3,2,2,3,2,4,1,2,"Scenario B"  
103,2,1,3,2,3,5,5,1,2,1,3,4,4,4,"Scenario A"  
103,1,2,3,3,1,4,3,2,1,1,1,2,1,4,"Scenario A"  
103,1,1,2,1,4,5,5,2,2,1,2,3,4,1,"Scenario B"  
103,2,1,2,3,1,1,3,1,2,2,1,2,3,1,"Scenario B"  
103,1,2,1,2,1,3,4,2,1,3,3,3,5,1,"Scenario A"  
103,2,2,3,2,1,1,5,1,1,2,3,4,2,2,"Scenario A"  
103,2,2,3,1,2,4,2,1,1,1,2,2,2,5,"Scenario A"  
103,2,2,1,1,3,3,4,1,1,2,3,1,3,5,"Scenario A"  
104,1,1,3,3,3,1,2,1,2,2,3,2,2,5,"Scenario B"  
104,1,2,3,2,1,1,4,2,1,2,3,4,5,3,"Scenario A"  
104,2,2,1,2,3,4,2,1,1,3,1,1,4,5,"Scenario A"  
104,1,2,1,1,3,2,1,2,1,1,2,4,3,1,"Scenario A"  
104,1,2,2,2,2,3,2,2,2,3,1,4,5,1,"Scenario B"  
104,2,1,2,1,2,1,4,1,1,1,3,2,5,2,"Scenario B"  
104,2,1,1,3,1,2,1,1,2,1,2,3,2,4,3,4,"Scenario A"  
104,1,1,3,3,1,5,2,2,2,2,1,3,1,3,"Scenario A"  
104,1,1,2,2,3,3,3,2,2,3,1,2,4,5,"Scenario A"  
104,1,2,2,3,1,5,4,2,1,3,2,4,2,5,"Scenario A"  
105,2,1,2,2,3,2,1,1,2,3,2,1,5,4,"Scenario A"  
105,1,2,2,3,2,1,5,2,1,1,1,4,3,3,"Scenario B"  
105,2,2,1,1,2,4,5,1,2,2,2,3,1,1,"Scenario B"  
105,1,1,3,3,1,4,1,2,2,1,2,4,3,2,"Scenario A"  
105,2,1,2,1,4,2,3,1,1,3,3,1,5,3,"Scenario A"  
105,2,2,3,1,1,1,1,1,1,1,3,3,3,4,"Scenario A"



105,1,2,1,2,3,2,4,2,1,2,2,2,5,3,"Scenario A"  
105,2,2,3,3,4,3,5,2,1,2,1,3,5,2,"Scenario A"  
105,1,2,1,1,2,4,5,2,1,3,3,4,2,4,"Scenario B"  
105,1,1,2,2,2,1,1,2,2,3,1,1,1,2,"Scenario A"  
445,1,2,2,2,4,3,2,1,1,1,3,3,4,3,"Scenario A"  
445,2,1,3,1,2,5,4,1,2,1,3,4,2,1,"Scenario B"  
445,1,1,1,3,1,4,5,2,2,2,2,2,3,5,"Scenario B"  
445,2,1,2,2,1,4,1,1,2,2,1,3,1,2,"Scenario B"  
445,1,1,3,2,2,2,3,2,2,3,3,1,2,4,"Scenario B"  
445,2,1,1,1,4,1,2,1,2,3,2,2,5,3,"Scenario B"  
445,2,1,1,2,1,4,4,1,2,3,1,3,3,5,"Scenario B"  
445,2,2,2,3,3,5,4,1,2,2,3,4,4,1,"Scenario B"  
445,1,1,2,1,4,3,5,2,1,1,2,3,5,1,"Scenario A"  
445,1,1,3,1,1,1,2,2,2,3,3,2,4,1,"Scenario A"  
478,2,1,2,3,1,3,1,1,2,1,1,1,2,2,"Scenario A"  
478,1,1,2,1,2,2,3,2,2,3,2,4,1,2,"Scenario B"  
478,2,1,3,2,3,5,5,1,2,1,3,4,4,4,"Scenario B"  
478,1,2,3,3,1,4,3,2,1,1,1,2,1,4,"Scenario A"  
478,1,1,2,1,4,5,5,2,2,1,2,3,4,1,"Scenario B"  
478,2,1,2,3,1,1,3,1,2,2,1,2,3,1,"Scenario B"  
478,1,2,1,2,1,3,4,2,1,3,3,3,5,1,"Scenario A"  
478,2,2,3,2,1,1,5,1,1,2,3,4,2,2,"Scenario B"  
478,2,2,3,1,2,4,2,1,1,1,2,2,2,5,"Scenario A"  
478,2,2,1,1,3,3,4,1,1,2,3,1,3,5,"Scenario A"  
444,1,1,3,3,3,1,2,1,2,2,3,2,2,5,"Scenario A"  
444,1,2,3,2,1,1,4,2,1,2,3,4,5,3,"Scenario A"  
444,2,2,1,2,3,4,2,1,1,3,1,1,4,5,"Scenario A"  
444,1,2,1,1,3,2,1,2,1,1,2,4,3,1,"Scenario A"  
444,1,2,2,2,2,3,2,2,2,3,1,4,5,1,"Scenario A"  
444,2,1,2,1,2,1,4,1,1,1,1,3,2,5,2,"Scenario A"  
444,2,1,1,3,1,2,1,1,2,3,2,4,3,4,"Scenario A"  
444,1,1,3,3,1,5,2,2,2,2,1,3,1,3,"Scenario A"  
444,1,1,2,2,3,3,3,2,2,3,1,2,4,5,"Scenario A"  
444,1,2,2,3,1,5,4,2,1,3,2,4,2,5,"Scenario B"  
442,2,1,2,2,3,2,1,1,2,3,2,1,5,4,"Scenario A"  
442,1,2,2,3,2,1,5,2,1,1,1,4,3,3,"Scenario B"  
442,2,2,1,1,2,4,5,1,2,2,2,3,1,1,"Scenario B"  
442,1,1,3,3,1,4,1,2,2,1,2,4,3,2,"Scenario B"  
442,2,1,2,1,4,2,3,1,1,3,3,1,5,3,"Scenario A"  
442,2,2,3,1,1,1,1,1,1,1,3,3,3,4,"Scenario A"  
442,1,2,1,2,3,2,4,2,1,2,2,2,5,3,"Scenario A"  
442,2,2,3,3,4,3,5,2,1,2,1,3,5,2,"Scenario A"  
442,1,2,1,1,2,4,5,2,1,3,3,4,2,4,"Scenario B"  
442,1,1,2,2,2,1,1,2,2,3,1,1,1,2,"Scenario A"  
452,1,2,2,2,4,3,2,1,1,1,3,3,4,3,"Scenario A"  
452,2,1,3,1,2,5,4,1,2,1,3,4,2,1,"Scenario B"  
452,1,1,1,3,1,4,5,2,2,2,2,2,3,5,"Scenario B"  
452,2,1,2,2,1,4,1,1,2,2,1,3,1,2,"Scenario A"  
452,1,1,3,2,2,2,3,2,2,3,3,1,2,4,"Scenario A"  
452,2,1,1,1,4,1,2,1,2,3,2,2,5,3,"Scenario A"  
452,2,1,1,2,1,4,4,1,2,3,1,3,3,5,"Scenario A"  
452,2,2,2,3,3,5,4,1,2,2,3,4,4,1,"Scenario B"  
452,1,1,2,1,4,3,5,2,1,1,2,3,5,1,"Scenario B"  
452,1,1,3,1,1,1,2,2,2,3,3,2,4,1,"Scenario B"  
262,2,1,2,3,1,3,1,1,2,1,1,1,2,2,"Scenario A"  
262,1,1,2,1,2,2,3,2,2,3,2,4,1,2,"Scenario B"  
262,2,1,3,2,3,5,5,1,2,1,3,4,4,4,"Scenario B"

262,1,2,3,3,1,4,3,2,1,1,1,2,1,4,"Scenario A"  
262,1,1,2,1,4,5,5,2,2,1,2,3,4,1,"Scenario B"  
262,2,1,2,3,1,1,3,1,2,2,1,2,3,1,"Scenario B"  
262,1,2,1,2,1,3,4,2,1,3,3,3,5,1,"Scenario B"  
262,2,2,3,2,1,1,5,1,1,2,3,4,2,2,"Scenario B"  
262,2,2,3,1,2,4,2,1,1,1,2,2,2,5,"Scenario A"  
262,2,2,1,1,3,3,4,1,1,2,3,1,3,5,"Scenario A"  
464,1,1,3,3,3,1,2,1,2,2,3,2,2,5,"Scenario A"  
464,1,2,3,2,1,1,4,2,1,2,3,4,5,3,"Scenario A"  
464,2,2,1,2,3,4,2,1,1,3,1,1,4,5,"Scenario B"  
464,1,2,1,1,3,2,1,2,1,1,2,4,3,1,"Scenario B"  
464,1,2,2,2,2,3,2,2,2,3,1,4,5,1,"Scenario B"  
464,2,1,2,2,1,2,1,4,1,1,1,3,2,5,2,"Scenario B"  
464,2,1,1,3,1,2,1,1,2,3,2,4,3,4,"Scenario B"  
464,1,1,2,2,3,3,3,2,2,3,1,2,4,5,"Scenario B"  
464,1,2,2,3,1,5,4,2,1,3,2,4,2,5,"Scenario A"  
271,2,1,2,2,3,2,1,1,2,3,2,1,5,4,"Scenario A"  
271,1,2,2,3,2,1,5,2,1,1,1,4,3,3,"Scenario B"  
271,2,2,1,1,2,4,5,1,2,2,2,3,1,1,"Scenario B"  
271,1,1,3,3,1,4,1,2,2,1,2,4,3,2,"Scenario A"  
271,2,1,2,1,4,2,3,1,1,3,3,1,5,3,"Scenario B"  
271,2,2,3,1,1,1,1,1,1,1,3,3,3,4,"Scenario A"  
271,1,2,1,2,3,2,4,2,1,2,2,2,5,3,"Scenario B"  
271,2,2,3,3,4,3,5,2,1,2,1,3,5,2,"Scenario B"  
271,1,2,1,1,2,4,5,2,1,3,3,4,2,4,"Scenario B"  
271,1,1,2,2,2,1,1,2,2,3,1,1,1,2,"Scenario A"  
259,1,2,2,2,4,3,2,1,1,1,3,3,4,3,"Scenario A"  
259,2,1,3,1,2,5,4,1,2,1,3,4,2,1,"Scenario B"  
259,1,1,1,3,1,4,5,2,2,2,2,2,3,5,"Scenario A"  
259,2,1,2,2,1,4,1,1,2,2,1,3,1,2,"Scenario A"  
259,1,1,3,2,2,2,3,2,2,3,3,1,2,4,"Scenario B"  
259,2,1,1,1,4,1,2,1,2,3,2,2,5,3,"Scenario B"  
259,2,1,1,2,1,4,4,1,2,3,1,3,3,5,"Scenario B"  
259,2,2,2,3,3,5,4,1,2,2,3,4,4,1,"Scenario B"  
259,1,1,2,1,4,3,5,2,1,1,2,3,5,1,"Scenario B"  
259,1,1,3,1,1,1,2,2,2,3,3,2,4,1,"Scenario B"  
265,2,1,2,3,1,3,1,1,2,1,1,1,2,2,"Scenario A"  
265,1,1,2,1,2,2,3,2,2,3,2,4,1,2,"Scenario B"  
265,2,1,3,2,3,5,5,1,2,1,3,4,4,4,"Scenario B"  
265,1,2,3,3,1,4,3,2,1,1,1,2,1,4,"Scenario B"  
265,1,1,2,1,4,5,5,2,2,1,2,3,4,1,"Scenario A"  
265,2,1,2,3,1,1,3,1,2,2,1,2,3,1,"Scenario A"  
265,1,2,1,2,1,3,4,2,1,3,3,3,5,1,"Scenario B"  
265,2,2,3,2,1,1,5,1,1,2,3,4,2,2,"Scenario B"  
265,2,2,3,1,2,4,2,1,1,1,2,2,2,5,"Scenario A"  
265,2,2,1,1,3,3,4,1,1,2,3,1,3,5,"Scenario A"  
287,1,1,3,3,3,1,2,1,2,2,3,2,2,5,"Scenario A"  
287,1,2,3,2,1,1,4,2,1,2,3,4,5,3,"Scenario B"  
287,2,2,1,2,3,4,2,1,1,3,1,1,4,5,"Scenario B"  
287,1,2,1,1,3,2,1,2,1,1,2,4,3,1,"Scenario B"  
287,1,2,2,2,2,3,2,2,2,3,1,4,5,1,"Scenario B"  
287,2,1,2,1,2,1,4,1,1,1,3,2,5,2,"Scenario B"  
287,2,1,1,3,1,2,1,1,2,3,2,4,3,4,"Scenario A"  
287,1,1,3,3,1,5,2,2,2,2,1,3,1,3,"Scenario A"  
287,1,1,2,2,3,3,3,2,2,3,1,2,4,5,"Scenario B"  
287,1,2,2,3,1,5,4,2,1,3,2,4,2,5,"Scenario B"  
459,2,1,2,2,3,2,1,1,2,3,2,1,5,4,"Scenario B"

459,1,2,2,3,2,1,5,2,1,1,1,4,3,3,"Scenario A"  
459,2,2,1,1,2,4,5,1,2,2,2,3,1,1,"Scenario B"  
459,1,1,3,3,1,4,1,2,2,1,2,4,3,2,"Scenario A"  
459,2,1,2,1,4,2,3,1,1,3,3,1,5,3,"Scenario B"  
459,2,2,3,1,1,1,1,1,1,1,3,3,3,4,"Scenario A"  
459,1,2,1,2,3,2,4,2,1,2,2,2,5,3,"Scenario B"  
459,2,2,3,3,4,3,5,2,1,2,1,3,5,2,"Scenario A"  
459,1,2,1,1,2,4,5,2,1,3,3,4,2,4,"Scenario B"  
459,1,1,2,2,2,1,1,2,2,3,1,1,1,2,"Scenario B"  
288,1,2,2,2,4,3,2,1,1,1,3,3,4,3,"Scenario A"  
288,2,1,3,1,2,5,4,1,2,1,3,4,2,1,"Scenario B"  
288,1,1,1,3,1,4,5,2,2,2,2,2,3,5,"Scenario A"  
288,2,1,2,2,1,4,1,1,2,2,1,3,1,2,"Scenario A"  
288,1,1,3,2,2,2,3,2,2,3,3,1,2,4,"Scenario A"  
288,2,1,1,1,4,1,2,1,2,3,2,2,5,3,"Scenario A"  
288,2,1,1,2,1,4,4,1,2,3,1,3,3,5,"Scenario A"  
288,2,2,2,3,3,5,4,1,2,2,3,4,4,1,"Scenario B"  
288,1,1,2,1,4,3,5,2,1,1,2,3,5,1,"Scenario B"  
288,1,1,3,1,1,1,2,2,2,3,3,2,4,1,"Scenario B"  
266,2,1,2,3,1,3,1,1,2,1,1,1,2,2,"Scenario A"  
266,1,1,2,1,2,2,3,2,2,3,2,4,1,2,"Scenario B"  
266,2,1,3,2,3,5,5,1,2,1,3,4,4,4,"Scenario A"  
266,1,2,3,3,1,4,3,2,1,1,1,2,1,4,"Scenario A"  
266,1,1,2,1,4,5,5,2,2,1,2,3,4,1,"Scenario B"  
266,2,1,2,3,1,1,3,1,2,2,1,2,3,1,"Scenario B"  
266,1,2,1,2,1,3,4,2,1,3,3,3,5,1,"Scenario B"  
266,2,2,3,2,1,1,5,1,1,2,3,4,2,2,"Scenario B"  
266,2,2,3,1,2,4,2,1,1,1,2,2,2,5,"Scenario A"  
266,2,2,1,1,3,3,4,1,1,2,3,1,3,5,"Scenario A"  
260,1,1,3,3,3,1,2,1,2,2,3,2,2,5,"Scenario A"  
260,1,2,3,2,1,1,4,2,1,2,3,4,5,3,"Scenario B"  
260,2,2,1,2,3,4,2,1,1,3,1,1,4,5,"Scenario A"  
260,1,2,1,1,3,2,1,2,1,1,2,4,3,1,"Scenario A"  
260,1,2,2,2,2,3,2,2,2,3,1,4,5,1,"Scenario B"  
260,2,1,2,1,2,1,4,1,1,1,3,2,5,2,"Scenario B"  
260,2,1,1,3,1,2,1,1,2,3,2,4,3,4,"Scenario B"  
260,1,1,3,3,1,5,2,2,2,2,1,3,1,3,"Scenario A"  
260,1,1,2,2,3,3,3,2,2,3,1,2,4,5,"Scenario A"  
260,1,2,2,3,1,5,4,2,1,3,2,4,2,5,"Scenario A"  
418,2,1,2,2,3,2,1,1,2,3,2,1,5,4,"Scenario B"  
418,1,2,2,3,2,1,5,2,1,1,1,4,3,3,"Scenario B"  
418,2,2,1,1,2,4,5,1,2,2,2,3,1,1,"Scenario A"  
418,1,1,3,3,1,4,1,2,2,1,2,4,3,2,"Scenario A"  
418,2,1,2,1,4,2,3,1,1,3,3,1,5,3,"Scenario B"  
418,2,2,3,1,1,1,1,1,1,1,3,3,3,4,"Scenario A"  
418,1,2,1,2,3,2,4,2,1,2,2,2,5,3,"Scenario B"  
418,2,2,3,3,4,3,5,2,1,2,1,3,5,2,"Scenario B"  
418,1,2,1,1,2,4,5,2,1,3,3,4,2,4,"Scenario B"  
418,1,1,2,2,2,1,1,2,2,3,1,1,1,2,"Scenario A"  
460,1,2,2,2,4,3,2,1,1,1,3,3,4,3,"Scenario A"  
460,2,1,3,1,2,5,4,1,2,1,3,4,2,1,"Scenario B"  
460,1,1,1,3,1,4,5,2,2,2,2,2,3,5,"Scenario B"  
460,2,1,2,2,1,4,1,1,2,2,1,3,1,2,"Scenario A"  
460,1,1,3,2,2,2,3,2,2,3,3,1,2,4,"Scenario A"  
460,2,1,1,1,4,1,2,1,2,3,2,2,5,3,"Scenario A"  
460,2,1,1,2,1,4,4,1,2,3,1,3,3,5,"Scenario B"  
460,2,2,2,3,3,5,4,1,2,2,3,4,4,1,"Scenario B"

460,1,1,2,1,4,3,5,2,1,1,2,3,5,1,"Scenario B"  
460,1,1,3,1,1,1,2,2,2,3,3,2,4,1,"Scenario B"  
263,2,1,2,3,1,3,1,1,2,1,1,1,2,2,"Scenario A"  
263,1,1,2,1,2,2,3,2,2,3,2,4,1,2,"Scenario B"  
263,2,1,3,2,3,5,5,1,2,1,3,4,4,4,"Scenario A"  
263,1,2,3,3,1,4,3,2,1,1,1,2,1,4,"Scenario A"  
263,1,1,2,1,4,5,5,2,2,1,2,3,4,1,"Scenario B"  
263,2,1,2,3,1,1,3,1,2,2,1,2,3,1,"Scenario B"  
263,1,2,1,2,1,3,4,2,1,3,3,3,5,1,"Scenario B"  
263,2,2,3,2,1,1,5,1,1,2,3,4,2,2,"Scenario B"  
263,2,2,3,1,2,4,2,1,1,1,2,2,2,5,"Scenario A"  
263,2,2,1,1,3,3,4,1,1,2,3,1,3,5,"Scenario B"  
302,1,1,3,3,3,1,2,1,2,2,3,2,2,5,"Scenario A"  
302,1,2,3,2,1,1,4,2,1,2,3,4,5,3,"Scenario A"  
302,2,2,1,2,3,4,2,1,1,3,1,1,4,5,"Scenario B"  
302,1,2,1,1,3,2,1,2,1,1,2,4,3,1,"Scenario A"  
302,1,2,2,2,2,3,2,2,2,3,1,4,5,1,"Scenario B"  
302,2,1,2,1,2,1,4,1,1,1,3,2,5,2,"Scenario B"  
302,2,1,1,3,1,2,1,1,2,3,2,4,3,4,"Scenario A"  
302,1,1,3,3,1,5,2,2,2,2,1,3,1,3,"Scenario A"  
302,1,1,2,2,3,3,3,2,2,3,1,2,4,5,"Scenario B"  
302,1,2,2,3,1,5,4,2,1,3,2,4,2,5,"Scenario A"  
264,2,1,2,2,3,2,1,1,2,3,2,1,5,4,"Scenario A"  
264,1,2,2,3,2,1,5,2,1,1,1,4,3,3,"Scenario B"  
264,2,2,1,1,2,4,5,1,2,2,2,3,1,1,"Scenario B"  
264,1,1,3,3,1,4,1,2,2,1,2,4,3,2,"Scenario A"  
264,2,1,2,1,4,2,3,1,1,3,3,1,5,3,"Scenario B"  
264,2,2,3,1,1,1,1,1,1,1,3,3,3,4,"Scenario A"  
264,1,2,1,2,3,2,4,2,1,2,2,2,5,3,"Scenario B"  
264,2,2,3,3,4,3,5,2,1,2,1,3,5,2,"Scenario B"  
264,1,2,1,1,2,4,5,2,1,3,3,4,2,4,"Scenario B"  
264,1,1,2,2,2,1,1,2,2,3,1,1,1,2,"Scenario A"  
261,1,2,2,2,4,3,2,1,1,1,3,3,4,3,"Scenario A"  
261,2,1,3,1,2,5,4,1,2,1,3,4,2,1,"Scenario A"  
261,1,1,1,3,1,4,5,2,2,2,2,2,3,5,"Scenario A"  
261,2,1,2,2,1,4,1,1,2,2,1,3,1,2,"Scenario A"  
261,1,1,3,2,2,2,3,2,2,3,3,1,2,4,"Scenario B"  
261,2,1,1,1,4,1,2,1,2,3,2,2,5,3,"Scenario A"  
261,2,1,1,2,1,4,4,1,2,3,1,3,3,5,"Scenario B"  
261,2,2,2,3,3,5,4,1,2,2,3,4,4,1,"Scenario B"  
261,1,1,2,1,4,3,5,2,1,1,2,3,5,1,"Scenario B"  
261,1,1,3,1,1,1,2,2,2,3,3,2,4,1,"Scenario B"  
285,2,1,2,3,1,3,1,1,2,1,1,1,2,2,"Scenario A"  
285,1,1,2,1,2,2,3,2,2,3,2,4,1,2,"Scenario B"  
285,2,1,3,2,3,5,5,1,2,1,3,4,4,4,"Scenario A"  
285,1,2,3,3,1,4,3,2,1,1,1,2,1,4,"Scenario A"  
285,1,1,2,1,4,5,5,2,2,1,2,3,4,1,"Scenario A"  
285,2,1,2,3,1,1,3,1,2,2,1,2,3,1,"Scenario A"  
285,1,2,1,2,1,1,3,4,2,1,3,3,3,5,1,"Scenario B"  
285,2,2,3,2,1,1,5,1,1,2,3,4,2,2,"Scenario A"  
285,2,2,3,1,2,4,2,1,1,1,2,2,2,5,"Scenario A"  
285,2,2,1,1,3,3,4,1,1,2,3,1,3,5,"Scenario B"  
296,1,1,3,3,3,1,2,1,2,2,3,2,2,5,"Scenario A"  
296,1,2,3,2,1,1,4,2,1,2,3,4,5,3,"Scenario A"  
296,2,2,1,2,3,4,2,1,1,3,1,1,4,5,"Scenario B"  
296,1,2,1,1,3,2,1,2,1,1,2,4,3,1,"Scenario B"  
296,1,2,2,2,2,3,2,2,2,3,1,4,5,1,"Scenario B"

296,2,1,2,1,2,1,4,1,1,1,3,2,5,2,"Scenario B"  
296,2,1,1,3,1,2,1,1,2,3,2,4,3,4,"Scenario A"  
296,1,1,3,3,1,5,2,2,2,2,1,3,1,3,"Scenario A"  
296,1,1,2,2,3,3,3,2,2,3,1,2,4,5,"Scenario B"  
296,1,2,2,3,1,5,4,2,1,3,2,4,2,5,"Scenario A"  
293,2,1,2,2,3,2,1,1,2,3,2,1,5,4,"Scenario A"  
293,1,2,2,3,2,1,5,2,1,1,1,4,3,3,"Scenario A"  
293,2,2,1,1,2,4,5,1,2,2,2,3,1,1,"Scenario B"  
293,1,1,3,3,1,4,1,2,2,1,2,4,3,2,"Scenario A"  
293,2,1,2,1,4,2,3,1,1,3,3,1,5,3,"Scenario A"  
293,2,2,3,1,1,1,1,1,1,1,3,3,3,4,"Scenario B"  
293,1,2,1,2,3,2,4,2,1,2,2,2,5,3,"Scenario A"  
293,2,2,3,3,4,3,5,2,1,2,1,3,5,2,"Scenario B"  
293,1,2,1,1,2,4,5,2,1,3,3,4,2,4,"Scenario A"  
293,1,1,2,2,2,1,1,2,2,3,1,1,1,2,"Scenario B"  
286,1,2,2,2,4,3,2,1,1,1,3,3,4,3,"Scenario A"  
286,2,1,3,1,2,5,4,1,2,1,3,4,2,1,"Scenario B"  
286,1,1,1,3,1,4,5,2,2,2,2,2,3,5,"Scenario A"  
286,2,1,2,2,1,4,1,1,2,2,1,3,1,2,"Scenario A"  
286,1,1,3,2,2,2,3,2,2,3,3,1,2,4,"Scenario A"  
286,2,1,1,1,4,1,2,1,2,3,2,2,5,3,"Scenario B"  
286,2,1,1,2,1,4,4,1,2,3,1,3,3,5,"Scenario A"  
286,2,2,2,3,3,5,4,1,2,2,3,4,4,1,"Scenario B"  
286,1,1,2,1,4,3,5,2,1,1,2,3,5,1,"Scenario B"  
286,1,1,3,1,1,1,2,2,2,3,3,2,4,1,"Scenario B"  
394,2,1,2,3,1,3,1,1,2,1,1,1,2,2,"Scenario A"  
394,1,1,2,1,2,2,3,2,2,3,2,4,1,2,"Scenario B"  
394,2,1,3,2,3,5,5,1,2,1,3,4,4,4,"Scenario B"  
394,1,2,3,3,1,4,3,2,1,1,1,2,1,4,"Scenario A"  
394,1,1,2,1,4,5,5,2,2,1,2,3,4,1,"Scenario A"  
394,2,1,2,3,1,1,3,1,2,2,1,2,3,1,"Scenario A"  
394,1,2,1,2,1,3,4,2,1,3,3,3,5,1,"Scenario B"  
394,2,2,3,2,1,1,5,1,1,2,3,4,2,2,"Scenario A"  
394,2,2,3,1,2,4,2,1,1,1,2,2,2,5,"Scenario A"  
394,2,2,1,1,3,3,4,1,1,2,3,1,3,5,"Scenario B"  
396,1,1,3,3,3,1,2,1,2,2,3,2,2,5,"Scenario B"  
396,1,2,3,2,1,1,4,2,1,2,3,4,5,3,"Scenario A"  
396,2,2,1,2,3,4,2,1,1,3,1,1,4,5,"Scenario B"  
396,1,2,1,1,3,2,1,2,1,1,2,4,3,1,"Scenario A"  
396,1,2,2,2,2,3,2,2,2,3,1,4,5,1,"Scenario A"  
396,2,1,2,1,2,1,4,1,1,1,3,2,5,2,"Scenario B"  
396,2,1,1,3,1,2,1,1,2,3,2,4,3,4,"Scenario A"  
396,1,1,3,3,1,5,2,2,2,2,1,3,1,3,"Scenario A"  
396,1,1,2,2,3,3,3,2,2,3,1,2,4,5,"Scenario A"  
396,1,2,2,3,1,5,4,2,1,3,2,4,2,5,"Scenario A"  
498,2,1,2,2,3,2,1,1,2,3,2,1,5,4,"Scenario A"  
498,1,2,2,3,2,1,5,2,1,1,1,4,3,3,"Scenario B"  
498,2,2,1,1,2,4,5,1,2,2,2,3,1,1,"Scenario A"  
498,1,1,3,3,1,4,1,2,2,1,2,4,3,2,"Scenario B"  
498,2,1,2,1,4,2,3,1,1,3,3,1,5,3,"Scenario B"  
498,2,2,3,1,1,1,1,1,1,1,3,3,3,4,"Scenario B"  
498,1,2,1,2,3,2,4,2,1,2,2,2,5,3,"Scenario A"  
498,2,2,3,3,4,3,5,2,1,2,1,3,5,2,"Scenario B"  
498,1,2,1,1,2,4,5,2,1,3,3,4,2,4,"Scenario A"  
498,1,1,2,2,2,1,1,2,2,3,1,1,1,2,"Scenario B"  
294,1,2,2,2,4,3,2,1,1,1,3,3,4,3,"Scenario A"  
294,2,1,3,1,2,5,4,1,2,1,3,4,2,1,"Scenario A"

294,1,1,1,3,1,4,5,2,2,2,2,2,3,5,"Scenario B"  
294,2,1,2,2,1,4,1,1,2,2,1,3,1,2,"Scenario A"  
294,1,1,3,2,2,2,3,2,2,3,3,1,2,4,"Scenario B"  
294,2,1,1,1,4,1,2,1,2,3,2,2,5,3,"Scenario A"  
294,2,1,1,2,1,4,4,1,2,3,1,3,3,5,"Scenario A"  
294,2,2,2,3,3,5,4,1,2,2,3,4,4,1,"Scenario A"  
294,1,1,2,1,4,3,5,2,1,1,2,3,5,1,"Scenario A"  
294,1,1,3,1,1,1,2,2,2,3,3,2,4,1,"Scenario B"  
432,2,1,2,3,1,3,1,1,2,1,1,1,2,2,"Scenario B"  
432,1,1,2,1,2,2,3,2,2,3,2,4,1,2,"Scenario B"  
432,2,1,3,2,3,5,5,1,2,1,3,4,4,4,"Scenario A"  
432,1,2,3,3,1,4,3,2,1,1,1,2,1,4,"Scenario A"  
432,1,1,2,1,4,5,5,2,2,1,2,3,4,1,"Scenario B"  
432,2,1,2,3,1,1,3,1,2,2,1,2,3,1,"Scenario B"  
432,1,2,1,2,1,3,4,2,1,3,3,3,5,1,"Scenario B"  
432,2,2,3,2,1,1,5,1,1,2,3,4,2,2,"Scenario A"  
432,2,2,3,1,2,4,2,1,1,1,2,2,2,5,"Scenario A"  
432,2,2,1,1,3,3,4,1,1,2,3,1,3,5,"Scenario B"  
393,1,1,3,3,3,1,2,1,2,2,3,2,2,5,"Scenario B"  
393,1,2,3,2,1,1,4,2,1,2,3,4,5,3,"Scenario A"  
393,2,2,1,2,3,4,2,1,1,3,1,1,4,5,"Scenario A"  
393,1,2,1,1,3,2,1,2,1,1,2,4,3,1,"Scenario B"  
393,1,2,2,2,2,3,2,2,2,3,1,4,5,1,"Scenario B"  
393,2,1,2,1,2,1,4,1,1,1,3,2,5,2,"Scenario A"  
393,2,1,1,3,1,2,1,1,2,3,2,4,3,4,"Scenario A"  
393,1,1,3,3,1,5,2,2,2,2,1,3,1,3,"Scenario A"  
393,1,1,2,2,3,3,3,2,2,3,1,2,4,5,"Scenario B"  
393,1,2,2,3,1,5,4,2,1,3,2,4,2,5,"Scenario A"  
500,2,1,2,2,3,2,1,1,2,3,2,1,5,4,"Scenario A"  
500,1,2,2,3,2,1,5,2,1,1,1,4,3,3,"Scenario A"  
500,2,2,1,1,2,2,4,5,1,2,2,2,3,1,1,"Scenario B"  
500,1,1,3,3,1,4,1,2,2,1,2,4,3,2,"Scenario A"  
500,2,1,2,1,4,2,3,1,1,3,3,1,5,3,"Scenario B"  
500,2,2,3,1,1,1,1,1,1,1,3,3,3,4,"Scenario A"  
500,1,2,1,2,3,2,4,2,1,2,2,2,5,3,"Scenario B"  
500,2,2,3,3,4,3,5,2,1,2,1,3,5,2,"Scenario B"  
500,1,2,1,1,2,4,5,2,1,3,3,4,2,4,"Scenario A"  
500,1,1,2,2,2,1,1,2,2,3,1,1,1,2,"Scenario A"  
429,1,2,2,2,4,3,2,1,1,1,3,3,4,3,"Scenario A"  
429,2,1,3,1,2,5,4,1,2,1,3,4,2,1,"Scenario A"  
429,1,1,1,3,1,4,5,2,2,2,2,2,3,5,"Scenario A"  
429,2,1,2,2,1,4,1,1,2,2,1,3,1,2,"Scenario A"  
429,1,1,3,2,2,2,3,2,2,3,3,1,2,4,"Scenario B"  
429,2,1,1,1,4,1,2,1,2,3,2,2,5,3,"Scenario A"  
429,2,1,1,2,1,4,4,1,2,3,1,3,3,5,"Scenario A"  
429,2,2,2,3,3,5,4,1,2,2,3,4,4,1,"Scenario A"  
429,1,1,2,1,4,3,5,2,1,1,2,3,5,1,"Scenario A"  
429,1,1,3,1,1,1,2,2,2,3,3,2,4,1,"Scenario A"  
398,2,1,2,3,1,3,1,1,2,1,1,1,2,2,"Scenario B"  
398,1,1,2,1,2,2,3,2,2,3,2,4,1,2,"Scenario A"  
398,2,1,3,2,3,5,5,1,2,1,3,4,4,4,"Scenario A"  
398,1,2,3,3,1,4,3,2,1,1,1,2,1,4,"Scenario A"  
398,1,1,2,1,4,5,5,2,2,1,2,3,4,1,"Scenario B"  
398,2,1,2,3,1,1,3,1,2,2,1,2,3,1,"Scenario A"  
398,1,2,1,2,1,3,4,2,1,3,3,3,5,1,"Scenario A"  
398,2,2,3,2,1,1,5,1,1,2,3,4,2,2,"Scenario B"  
398,2,2,3,1,2,4,2,1,1,1,2,2,2,5,"Scenario B"

398,2,2,1,1,3,3,4,1,1,2,3,1,3,5,"Scenario A"  
400,1,1,3,3,3,1,2,1,2,2,3,2,2,5,"Scenario A"  
400,1,2,3,2,1,1,4,2,1,2,3,4,5,3,"Scenario A"  
400,2,2,1,2,3,4,2,1,1,3,1,1,4,5,"Scenario B"  
400,1,2,1,1,3,2,1,2,1,1,2,4,3,1,"Scenario A"  
400,1,2,2,2,2,3,2,2,2,3,1,4,5,1,"Scenario A"  
400,2,1,2,1,2,1,4,1,1,1,3,2,5,2,"Scenario A"  
400,2,1,1,3,1,2,1,1,2,3,2,4,3,4,"Scenario A"  
400,1,1,3,3,1,5,2,2,2,2,1,3,1,3,"Scenario A"  
400,1,1,2,2,3,3,3,2,2,3,1,2,4,5,"Scenario A"  
400,1,2,2,3,1,5,4,2,1,3,2,4,2,5,"Scenario A"  
430,2,1,2,2,3,2,1,1,2,3,2,1,5,4,"Scenario A"  
430,1,2,2,3,2,1,5,2,1,1,1,4,3,3,"Scenario A"  
430,2,2,1,1,2,4,5,1,2,2,2,3,1,1,"Scenario B"  
430,1,1,3,3,1,4,1,2,2,1,2,4,3,2,"Scenario A"  
430,2,1,2,1,4,2,3,1,1,3,3,1,5,3,"Scenario B"  
430,2,2,3,1,1,1,1,1,1,1,3,3,3,4,"Scenario B"  
430,1,2,1,2,3,2,4,2,1,2,2,2,5,3,"Scenario A"  
430,2,2,3,3,4,3,5,2,1,2,1,3,5,2,"Scenario A"  
430,1,2,1,1,2,4,5,2,1,3,3,4,2,4,"Scenario A"  
430,1,1,2,2,2,1,1,2,2,3,1,1,1,2,"Scenario B"  
499,1,2,2,2,4,3,2,1,1,1,3,3,4,3,"Scenario B"  
499,2,1,3,1,2,5,4,1,2,1,3,4,2,1,"Scenario B"  
499,1,1,1,3,1,4,5,2,2,2,2,2,3,5,"Scenario A"  
499,2,1,2,2,1,4,1,1,2,2,1,3,1,2,"Scenario B"  
499,1,1,3,2,2,2,3,2,2,3,3,1,2,4,"Scenario A"  
499,2,1,1,1,4,1,2,1,2,3,2,2,5,3,"Scenario B"  
499,2,1,1,2,1,4,4,1,2,3,1,3,3,5,"Scenario B"  
499,2,2,2,3,3,5,4,1,2,2,3,4,4,1,"Scenario B"  
499,1,1,2,1,4,3,5,2,1,1,2,3,5,1,"Scenario A"  
499,1,1,3,1,1,1,2,2,2,3,3,2,4,1,"Scenario A"  
402,2,1,2,3,1,3,1,1,2,1,1,1,2,2,"Scenario A"  
402,1,1,2,1,2,2,3,2,2,3,2,4,1,2,"Scenario B"  
402,2,1,3,2,3,5,5,1,2,1,3,4,4,4,"Scenario A"  
402,1,2,3,3,1,4,3,2,1,1,1,2,1,4,"Scenario A"  
402,1,1,2,1,4,5,5,2,2,1,2,3,4,1,"Scenario B"  
402,2,1,2,3,1,1,3,1,2,2,1,2,3,1,"Scenario A"  
402,1,2,1,2,1,3,4,2,1,3,3,3,5,1,"Scenario B"  
402,2,2,3,2,1,1,5,1,1,2,3,4,2,2,"Scenario B"  
402,2,2,3,1,2,4,2,1,1,1,2,2,2,5,"Scenario B"  
402,2,2,1,1,3,3,4,1,1,2,3,1,3,5,"Scenario A"  
431,1,1,3,3,3,1,2,1,2,2,3,2,2,5,"Scenario B"  
431,1,2,3,2,1,1,4,2,1,2,3,4,5,3,"Scenario B"  
431,2,2,1,2,3,4,2,1,1,3,1,1,4,5,"Scenario B"  
431,1,2,1,1,3,2,1,2,1,1,2,4,3,1,"Scenario B"  
431,1,2,2,2,2,3,2,2,2,3,1,4,5,1,"Scenario A"  
431,2,1,2,1,2,1,4,1,1,1,3,2,5,2,"Scenario B"  
431,2,1,1,3,1,2,1,1,2,1,2,3,2,4,3,4,"Scenario B"  
431,1,1,3,3,1,5,2,2,2,2,1,3,1,3,"Scenario A"  
431,1,1,2,2,3,3,3,2,2,3,1,2,4,5,"Scenario B"  
431,1,2,2,3,1,5,4,2,1,3,2,4,2,5,"Scenario B"  
399,2,1,2,2,3,2,1,1,2,3,2,1,5,4,"Scenario B"  
399,1,2,2,3,2,1,5,2,1,1,1,4,3,3,"Scenario A"  
399,2,2,1,1,2,4,5,1,2,2,2,3,1,1,"Scenario B"  
399,1,1,3,3,1,4,1,2,2,1,2,4,3,2,"Scenario A"  
399,2,1,2,1,4,2,3,1,1,3,3,1,5,3,"Scenario A"  
399,2,2,3,1,1,1,1,1,1,1,3,3,3,4,"Scenario B"

399,1,2,1,2,3,2,4,2,1,2,2,2,5,3,"Scenario B"  
399,2,2,3,3,4,3,5,2,1,2,1,3,5,2,"Scenario A"  
399,1,2,1,1,2,4,5,2,1,3,3,4,2,4,"Scenario B"  
399,1,1,2,2,2,1,1,2,2,3,1,1,1,2,"Scenario A"  
22,1,2,2,2,4,3,2,1,1,1,3,3,4,3,"Scenario A"  
22,2,1,3,1,2,5,4,1,2,1,3,4,2,1,"Scenario B"  
22,1,1,1,3,1,4,5,2,2,2,2,2,3,5,"Scenario A"  
22,2,1,2,2,1,4,1,1,2,2,1,3,1,2,"Scenario A"  
22,1,1,3,2,2,2,3,2,2,3,3,1,2,4,"Scenario B"  
22,2,1,1,1,4,1,2,1,2,3,2,2,5,3,"Scenario A"  
22,2,1,1,2,1,4,4,1,2,3,1,3,3,5,"Scenario A"  
22,2,2,2,3,3,5,4,1,2,2,3,4,4,1,"Scenario B"  
22,1,1,2,1,4,3,5,2,1,1,2,3,5,1,"Scenario A"  
22,1,1,3,1,1,1,2,2,2,3,3,2,4,1,"Scenario B"  
25,2,1,2,3,1,3,1,1,2,1,1,1,2,2,"Scenario A"  
25,1,1,2,1,2,2,3,2,2,3,2,4,1,2,"Scenario A"  
25,2,1,3,2,3,5,5,1,2,1,3,4,4,4,"Scenario A"  
25,1,2,3,3,1,4,3,2,1,1,1,2,1,4,"Scenario A"  
25,1,1,2,1,4,5,5,2,2,1,2,3,4,1,"Scenario A"  
25,2,1,2,3,1,1,3,1,2,2,1,2,3,1,"Scenario A"  
25,1,2,1,2,1,3,4,2,1,3,3,3,5,1,"Scenario A"  
25,2,2,3,2,1,1,5,1,1,2,3,4,2,2,"Scenario A"  
25,2,2,3,1,2,4,2,1,1,1,2,2,2,5,"Scenario A"  
25,2,2,1,1,3,3,4,1,1,2,3,1,3,5,"Scenario A"  
21,1,1,3,3,3,1,2,1,2,2,3,2,2,5,"Scenario A"  
21,1,2,3,2,1,1,4,2,1,2,3,4,5,3,"Scenario A"  
21,2,2,1,2,3,4,2,1,1,3,1,1,4,5,"Scenario B"  
21,1,2,1,1,3,2,1,2,1,1,2,4,3,1,"Scenario A"  
21,1,2,2,2,2,3,2,2,2,3,1,4,5,1,"Scenario B"  
21,2,1,2,1,2,1,4,1,1,1,3,2,5,2,"Scenario A"  
21,2,1,1,3,1,2,1,1,2,3,2,4,3,4,"Scenario B"  
21,1,1,3,3,1,5,2,2,2,2,1,3,1,3,"Scenario A"  
21,1,1,2,2,3,3,3,2,2,3,1,2,4,5,"Scenario B"  
21,1,2,2,3,1,5,4,2,1,3,2,4,2,5,"Scenario B"  
24,2,1,2,2,3,2,1,1,2,3,2,1,5,4,"Scenario A"  
24,1,2,2,3,2,1,5,2,1,1,1,4,3,3,"Scenario A"  
24,2,2,1,1,2,4,5,1,2,2,2,3,1,1,"Scenario A"  
24,1,1,3,3,1,4,1,2,2,1,2,4,3,2,"Scenario B"  
24,2,1,2,1,4,2,3,1,1,3,3,1,5,3,"Scenario A"  
24,2,2,3,1,1,1,1,1,1,1,3,3,3,4,"Scenario A"  
24,1,2,1,2,3,2,4,2,1,2,2,2,5,3,"Scenario B"  
24,2,2,3,3,4,3,5,2,1,2,1,3,5,2,"Scenario A"  
24,1,2,1,1,2,4,5,2,1,3,3,4,2,4,"Scenario B"  
24,1,1,2,2,2,1,1,2,2,3,1,1,1,2,"Scenario A"  
23,1,2,2,2,4,3,2,1,1,1,3,3,4,3,"Scenario A"  
23,2,1,3,1,2,5,4,1,2,1,3,4,2,1,"Scenario B"  
23,1,1,1,3,1,4,5,2,2,2,2,2,3,5,"Scenario A"  
23,2,1,2,2,1,4,1,1,2,2,1,3,1,2,"Scenario A"  
23,1,1,3,2,2,2,3,2,2,3,3,1,2,4,"Scenario A"  
23,2,1,1,1,4,1,2,1,2,3,2,2,5,3,"Scenario A"  
23,2,2,2,3,3,5,4,1,2,2,3,4,4,1,"Scenario B"  
23,1,1,2,1,4,3,5,2,1,1,2,3,5,1,"Scenario A"  
23,1,1,3,1,1,1,2,2,2,3,3,2,4,1,"Scenario A"  
116,2,1,2,3,1,3,1,1,2,1,1,1,2,2,"Scenario A"  
116,1,1,2,1,2,2,3,2,2,3,2,4,1,2,"Scenario B"  
116,2,1,3,2,3,5,5,1,2,1,3,4,4,4,"Scenario B"  
116,1,2,3,3,1,4,3,2,1,1,1,2,1,4,"Scenario A"



116,1,1,2,1,4,5,5,2,2,1,2,3,4,1,"Scenario A"  
116,2,1,2,3,1,1,3,1,2,2,1,2,3,1,"Scenario B"  
116,1,2,1,2,1,3,4,2,1,3,3,3,5,1,"Scenario B"  
116,2,2,3,2,1,1,5,1,1,2,3,4,2,2,"Scenario B"  
116,2,2,3,1,2,4,2,1,1,1,2,2,2,5,"Scenario A"  
116,2,2,1,1,3,3,4,1,1,2,3,1,3,5,"Scenario B"  
117,1,1,3,3,3,1,2,1,2,2,3,2,2,5,"Scenario B"  
117,1,2,3,2,1,1,4,2,1,2,3,4,5,3,"Scenario A"  
117,2,2,1,2,3,4,2,1,1,3,1,1,4,5,"Scenario B"  
117,1,2,1,1,3,2,1,2,1,1,2,4,3,1,"Scenario A"  
117,1,2,2,2,2,3,2,2,2,3,1,4,5,1,"Scenario A"  
117,2,1,2,1,2,1,4,1,1,1,1,3,2,5,2,"Scenario A"  
117,2,1,1,3,1,2,1,1,2,3,2,4,3,4,"Scenario A"  
117,1,1,3,3,1,5,2,2,2,2,1,3,1,3,"Scenario B"  
117,1,1,2,2,3,3,3,2,2,3,1,2,4,5,"Scenario B"  
117,1,2,2,3,1,5,4,2,1,3,2,4,2,5,"Scenario A"  
118,2,1,2,2,3,2,1,1,2,3,2,1,5,4,"Scenario B"  
118,1,2,2,3,2,1,5,2,1,1,1,4,3,3,"Scenario B"  
118,2,2,1,1,2,4,5,1,2,2,2,3,1,1,"Scenario B"  
118,1,1,3,3,1,4,1,2,2,1,2,4,3,2,"Scenario B"  
118,2,1,2,1,4,2,3,1,1,3,3,1,5,3,"Scenario B"  
118,2,2,3,1,1,1,1,1,1,1,3,3,3,4,"Scenario B"  
118,1,2,1,2,3,2,4,2,1,2,2,2,5,3,"Scenario B"  
118,2,2,3,3,4,3,5,2,1,2,1,3,5,2,"Scenario B"  
118,1,2,1,1,2,4,5,2,1,3,3,4,2,4,"Scenario B"  
118,1,1,2,2,2,1,1,2,2,3,1,1,1,2,"Scenario A"  
119,1,2,2,2,4,3,2,1,1,1,3,3,4,3,"Scenario A"  
119,2,1,3,1,2,5,4,1,2,1,3,4,2,1,"Scenario B"  
119,1,1,1,3,1,4,5,2,2,2,2,2,3,5,"Scenario B"  
119,2,1,2,2,1,4,1,1,2,2,1,3,1,2,"Scenario A"  
119,1,1,3,2,2,2,3,2,2,3,3,1,2,4,"Scenario B"  
119,2,1,1,1,4,1,2,1,2,3,2,2,5,3,"Scenario B"  
119,2,1,1,2,1,4,4,1,2,3,1,3,3,5,"Scenario B"  
119,2,2,2,3,3,5,4,1,2,2,3,4,4,1,"Scenario A"  
119,1,1,2,1,4,3,5,2,1,1,2,3,5,1,"Scenario A"  
119,1,1,3,1,1,1,2,2,2,3,3,2,4,1,"Scenario B"  
120,2,1,2,3,1,3,1,1,2,1,1,1,2,2,"Scenario A"  
120,1,1,2,1,2,2,3,2,2,3,2,4,1,2,"Scenario B"  
120,2,1,3,2,3,5,5,1,2,1,3,4,4,4,"Scenario B"  
120,1,2,3,3,1,4,3,2,1,1,1,2,1,4,"Scenario A"  
120,1,1,2,1,4,5,5,2,2,1,2,3,4,1,"Scenario B"  
120,2,1,2,3,1,1,3,1,2,2,1,2,3,1,"Scenario B"  
120,1,2,1,2,1,3,4,2,1,3,3,3,5,1,"Scenario B"  
120,2,2,3,2,1,1,5,1,1,2,3,4,2,2,"Scenario B"  
120,2,2,3,1,2,4,2,1,1,1,2,2,2,5,"Scenario A"  
120,2,2,1,1,3,3,4,1,1,2,3,1,3,5,"Scenario A"  
121,1,1,3,3,3,1,2,1,2,2,3,2,2,5,"Scenario A"  
121,1,2,3,2,1,1,4,2,1,2,3,4,5,3,"Scenario B"  
121,2,2,1,2,3,4,2,1,1,3,1,1,4,5,"Scenario A"  
121,1,2,1,1,3,2,1,2,1,1,2,4,3,1,"Scenario B"  
121,1,2,2,2,2,3,2,2,2,3,1,4,5,1,"Scenario B"  
121,2,1,2,1,2,1,4,1,1,1,3,2,5,2,"Scenario B"  
121,2,1,1,3,1,2,1,1,2,3,2,4,3,4,"Scenario A"  
121,1,1,3,3,1,5,2,2,2,2,1,3,1,3,"Scenario A"  
121,1,1,2,2,3,3,3,2,2,3,1,2,4,5,"Scenario A"  
121,1,2,2,3,1,5,4,2,1,3,2,4,2,5,"Scenario B"  
122,2,1,2,2,3,2,1,1,2,3,2,1,5,4,"Scenario B"

122,1,2,2,3,2,1,5,2,1,1,1,4,3,3,"Scenario B"  
122,2,2,1,1,2,4,5,1,2,2,2,3,1,1,"Scenario A"  
122,1,1,3,3,1,4,1,2,2,1,2,4,3,2,"Scenario A"  
122,2,1,2,1,4,2,3,1,1,3,3,1,5,3,"Scenario A"  
122,2,2,3,1,1,1,1,1,1,1,3,3,3,4,"Scenario A"  
122,1,2,1,2,3,2,4,2,1,2,2,2,5,3,"Scenario A"  
122,2,2,3,3,4,3,5,2,1,2,1,3,5,2,"Scenario A"  
122,1,2,1,1,2,4,5,2,1,3,3,4,2,4,"Scenario B"  
122,1,1,2,2,2,1,1,2,2,3,1,1,1,2,"Scenario A"  
123,1,2,2,2,4,3,2,1,1,1,3,3,4,3,"Scenario A"  
123,2,1,3,1,2,5,4,1,2,1,3,4,2,1,"Scenario B"  
123,1,1,1,3,1,4,5,2,2,2,2,2,3,5,"Scenario B"  
123,2,1,2,2,1,4,1,1,2,2,1,3,1,2,"Scenario A"  
123,1,1,3,2,2,2,3,2,2,3,3,1,2,4,"Scenario A"  
123,2,1,1,1,4,1,2,1,2,3,2,2,5,3,"Scenario A"  
123,2,1,1,2,1,4,4,1,2,3,1,3,3,5,"Scenario A"  
123,2,2,2,3,3,5,4,1,2,2,3,4,4,1,"Scenario B"  
123,1,1,2,1,4,3,5,2,1,1,2,3,5,1,"Scenario B"  
123,1,1,3,1,1,1,2,2,2,3,3,2,4,1,"Scenario B"  
124,2,1,2,3,1,3,1,1,2,1,1,1,2,2,"Scenario A"  
124,1,1,2,1,2,2,3,2,2,3,2,4,1,2,"Scenario B"  
124,2,1,3,2,3,5,5,1,2,1,3,4,4,4,"Scenario B"  
124,1,2,3,3,1,4,3,2,1,1,1,2,1,4,"Scenario A"  
124,1,1,2,1,4,5,5,2,2,1,2,3,4,1,"Scenario B"  
124,2,1,2,3,1,1,3,1,2,2,1,2,3,1,"Scenario B"  
124,1,2,1,2,1,3,4,2,1,3,3,3,5,1,"Scenario B"  
124,2,2,3,2,1,1,5,1,1,2,3,4,2,2,"Scenario A"  
124,2,2,3,1,2,4,2,1,1,1,2,2,2,5,"Scenario A"  
124,2,2,1,1,3,3,4,1,1,2,3,1,3,5,"Scenario A"  
125,1,1,3,3,3,1,2,1,2,2,3,2,2,5,"Scenario B"  
125,1,2,3,2,1,1,4,2,1,2,3,4,5,3,"Scenario B"  
125,2,2,1,2,3,4,2,1,1,3,1,1,4,5,"Scenario B"  
125,1,2,1,1,3,2,1,2,1,1,2,4,3,1,"Scenario B"  
125,1,2,2,2,2,3,2,2,2,3,1,4,5,1,"Scenario B"  
125,2,1,2,1,2,1,4,1,1,1,3,2,5,2,"Scenario B"  
125,2,1,1,3,1,2,1,1,2,3,2,4,3,4,"Scenario B"  
125,1,1,3,3,1,5,2,2,2,2,1,3,1,3,"Scenario B"  
125,1,1,2,2,3,3,3,2,2,3,1,2,4,5,"Scenario B"  
125,1,2,2,3,1,5,4,2,1,3,2,4,2,5,"Scenario B"  
126,2,1,2,2,3,2,1,1,2,3,2,1,5,4,"Scenario A"  
126,1,2,2,3,2,1,5,2,1,1,1,4,3,3,"Scenario A"  
126,2,2,1,1,2,4,5,1,2,2,2,3,1,1,"Scenario B"  
126,1,1,3,3,1,4,1,2,2,1,2,4,3,2,"Scenario B"  
126,2,1,2,1,4,2,3,1,1,3,3,1,5,3,"Scenario A"  
126,2,2,3,1,1,1,1,1,1,1,3,3,3,4,"Scenario A"  
126,1,2,1,2,3,2,4,2,1,2,2,2,5,3,"Scenario A"  
126,2,2,3,3,4,3,5,2,1,2,1,3,5,2,"Scenario A"  
126,1,2,1,1,2,4,5,2,1,3,3,4,2,4,"Scenario A"  
126,1,1,2,2,2,1,1,2,2,3,1,1,1,2,"Scenario A"  
127,1,2,2,2,4,3,2,1,1,1,3,3,4,3,"Scenario A"  
127,2,1,3,1,2,5,4,1,2,1,3,4,2,1,"Scenario B"  
127,1,1,1,3,1,4,5,2,2,2,2,2,3,5,"Scenario B"  
127,2,1,2,2,1,4,1,1,2,2,1,3,1,2,"Scenario B"  
127,1,1,3,2,2,2,3,2,2,3,3,1,2,4,"Scenario B"  
127,2,1,1,1,4,1,2,1,2,3,2,2,5,3,"Scenario B"  
127,2,1,1,2,1,4,4,1,2,3,1,3,3,5,"Scenario B"  
127,2,2,2,3,3,5,4,1,2,2,3,4,4,1,"Scenario B"

127,1,1,2,1,4,3,5,2,1,1,2,3,5,1,"Scenario A"  
127,1,1,3,1,1,1,2,2,2,3,3,2,4,1,"Scenario B"  
128,2,1,2,3,1,3,1,1,2,1,1,1,2,2,"Scenario B"  
128,1,1,2,1,2,2,3,2,2,3,2,4,1,2,"Scenario B"  
128,2,1,3,2,3,5,5,1,2,1,3,4,4,4,"Scenario A"  
128,1,2,3,3,1,4,3,2,1,1,1,2,1,4,"Scenario A"  
128,1,1,2,1,4,5,5,2,2,1,2,3,4,1,"Scenario A"  
128,2,1,2,3,1,1,3,1,2,2,1,2,3,1,"Scenario B"  
128,1,2,1,2,1,3,4,2,1,3,3,3,5,1,"Scenario A"  
128,2,2,3,2,1,1,5,1,1,2,3,4,2,2,"Scenario A"  
128,2,2,3,1,2,4,2,1,1,1,2,2,2,5,"Scenario A"  
128,2,2,1,1,3,3,4,1,1,2,3,1,3,5,"Scenario A"  
129,1,1,3,3,3,1,2,1,2,2,3,2,2,5,"Scenario A"  
129,1,2,3,2,1,1,4,2,1,2,3,4,5,3,"Scenario B"  
129,2,2,1,2,3,4,2,1,1,3,1,1,4,5,"Scenario A"  
129,1,2,1,1,3,2,1,2,1,1,2,4,3,1,"Scenario A"  
129,1,2,2,2,2,3,2,2,2,3,1,4,5,1,"Scenario B"  
129,2,1,2,1,2,1,4,1,1,1,3,2,5,2,"Scenario B"  
129,2,1,1,3,1,2,1,1,2,3,2,4,3,4,"Scenario A"  
129,1,1,3,3,1,5,2,2,2,2,1,3,1,3,"Scenario A"  
129,1,1,2,2,3,3,3,2,2,3,1,2,4,5,"Scenario A"  
129,1,2,2,3,1,5,4,2,1,3,2,4,2,5,"Scenario A"  
130,2,1,2,2,3,2,1,1,2,3,2,1,5,4,"Scenario B"  
130,1,2,2,3,2,1,5,2,1,1,1,4,3,3,"Scenario A"  
130,2,2,1,1,2,4,5,1,2,2,2,3,1,1,"Scenario A"  
130,1,1,3,3,1,4,1,2,2,1,2,4,3,2,"Scenario B"  
130,2,1,2,1,4,2,3,1,1,3,3,1,5,3,"Scenario A"  
130,2,2,3,1,1,1,1,1,1,1,3,3,3,4,"Scenario A"  
130,1,2,1,2,3,2,4,2,1,2,2,2,5,3,"Scenario A"  
130,2,2,3,3,4,3,5,2,1,2,1,3,5,2,"Scenario B"  
130,1,2,1,1,2,4,5,2,1,3,3,4,2,4,"Scenario A"  
130,1,1,2,2,2,1,1,2,2,3,1,1,1,2,"Scenario A"  
131,1,2,2,2,4,3,2,1,1,1,3,3,4,3,"Scenario A"  
131,2,1,3,1,2,5,4,1,2,1,3,4,2,1,"Scenario B"  
131,1,1,1,3,1,4,5,2,2,2,2,2,3,5,"Scenario B"  
131,2,1,2,2,1,4,1,1,2,2,1,3,1,2,"Scenario B"  
131,1,1,3,2,2,2,3,2,2,3,3,1,2,4,"Scenario B"  
131,2,1,1,1,4,1,2,1,2,3,2,2,5,3,"Scenario B"  
131,2,1,1,2,1,4,4,1,2,3,1,3,3,5,"Scenario A"  
131,2,2,2,3,3,5,4,1,2,2,3,4,4,1,"Scenario A"  
131,1,1,2,1,4,3,5,2,1,1,2,3,5,1,"Scenario A"  
131,1,1,3,1,1,1,2,2,2,3,3,2,4,1,"Scenario B"  
132,2,1,2,3,1,3,1,1,2,1,1,1,2,2,"Scenario A"  
132,1,1,2,1,2,2,3,2,2,3,2,4,1,2,"Scenario B"  
132,2,1,3,2,3,5,5,1,2,1,3,4,4,4,"Scenario B"  
132,1,2,3,3,1,4,3,2,1,1,1,2,1,4,"Scenario A"  
132,1,1,2,1,4,5,5,2,2,1,2,3,4,1,"Scenario B"  
132,2,1,2,3,1,1,3,1,2,2,1,2,3,1,"Scenario B"  
132,1,2,1,2,1,3,4,2,1,3,3,3,5,1,"Scenario B"  
132,2,2,3,2,1,1,5,1,1,2,3,4,2,2,"Scenario B"  
132,2,2,3,1,2,4,2,1,1,1,2,2,2,5,"Scenario A"  
132,2,2,1,1,3,3,4,1,1,2,3,1,3,5,"Scenario A"  
133,1,1,3,3,3,1,2,1,2,2,3,2,2,5,"Scenario A"  
133,1,2,3,2,1,1,4,2,1,2,3,4,5,3,"Scenario A"  
133,2,2,1,2,3,4,2,1,1,3,1,1,4,5,"Scenario B"  
133,1,2,1,1,3,2,1,2,1,1,2,4,3,1,"Scenario B"  
133,1,2,2,2,2,3,2,2,2,3,1,4,5,1,"Scenario A"

133,2,1,2,1,2,1,4,1,1,1,3,2,5,2,"Scenario B"  
133,2,1,1,3,1,2,1,1,2,3,2,4,3,4,"Scenario A"  
133,1,1,3,3,1,5,2,2,2,2,1,3,1,3,"Scenario A"  
133,1,1,2,2,3,3,3,2,2,3,1,2,4,5,"Scenario A"  
133,1,2,2,3,1,5,4,2,1,3,2,4,2,5,"Scenario B"  
134,2,1,2,2,3,2,1,1,2,3,2,1,5,4,"Scenario A"  
134,1,2,2,3,2,1,5,2,1,1,1,4,3,3,"Scenario A"  
134,2,2,1,1,2,4,5,1,2,2,2,3,1,1,"Scenario B"  
134,1,1,3,3,1,4,1,2,2,1,2,4,3,2,"Scenario A"  
134,2,1,2,1,4,2,3,1,1,3,3,1,5,3,"Scenario A"  
134,2,2,3,1,1,1,1,1,1,1,3,3,3,4,"Scenario A"  
134,1,2,1,2,3,2,4,2,1,2,2,2,5,3,"Scenario B"  
134,2,2,3,3,4,3,5,2,1,2,1,3,5,2,"Scenario B"  
134,1,2,1,1,2,4,5,2,1,3,3,4,2,4,"Scenario A"  
134,1,1,2,2,2,1,1,2,2,3,1,1,1,2,"Scenario A"  
135,1,2,2,2,4,3,2,1,1,1,3,3,4,3,"Scenario A"  
135,2,1,3,1,2,5,4,1,2,1,3,4,2,1,"Scenario B"  
135,1,1,1,3,1,4,5,2,2,2,2,2,3,5,"Scenario B"  
135,2,1,2,2,1,4,1,1,2,2,1,3,1,2,"Scenario B"  
135,1,1,3,2,2,2,3,2,2,3,3,1,2,4,"Scenario B"  
135,2,1,1,1,4,1,2,1,2,3,2,2,5,3,"Scenario A"  
135,2,1,1,2,1,4,4,1,2,3,1,3,3,5,"Scenario A"  
135,2,2,2,3,3,5,4,1,2,2,3,4,4,1,"Scenario B"  
135,1,1,2,1,4,3,5,2,1,1,2,3,5,1,"Scenario B"  
135,1,1,3,1,1,1,2,2,2,3,3,2,4,1,"Scenario A"  
136,2,1,2,3,1,3,1,1,2,1,1,1,2,2,"Scenario A"  
136,1,1,2,1,2,2,3,2,2,3,2,4,1,2,"Scenario B"  
136,2,1,3,2,3,5,5,1,2,1,3,4,4,4,"Scenario B"  
136,1,2,3,3,1,4,3,2,1,1,1,2,1,4,"Scenario B"  
136,1,1,2,1,4,5,5,2,2,1,2,3,4,1,"Scenario B"  
136,2,1,2,3,1,1,3,1,2,2,1,2,3,1,"Scenario B"  
136,1,2,1,2,1,3,4,2,1,3,3,3,5,1,"Scenario B"  
136,2,2,3,2,1,1,5,1,1,2,3,4,2,2,"Scenario B"  
136,2,2,3,1,2,4,2,1,1,1,2,2,2,5,"Scenario B"  
136,2,2,1,1,3,3,4,1,1,2,3,1,3,5,"Scenario A"  
137,1,1,3,3,3,1,2,1,2,2,3,2,2,5,"Scenario B"  
137,1,2,3,2,1,1,4,2,1,2,3,4,5,3,"Scenario A"  
137,2,2,1,2,3,4,2,1,1,3,1,1,4,5,"Scenario A"  
137,1,2,1,1,3,2,1,2,1,1,2,4,3,1,"Scenario A"  
137,1,2,2,2,2,3,2,2,2,3,1,4,5,1,"Scenario A"  
137,2,1,2,1,2,1,4,1,1,1,3,2,5,2,"Scenario A"  
137,2,1,1,3,1,2,1,1,2,3,2,4,3,4,"Scenario A"  
137,1,1,3,3,1,5,2,2,2,2,1,3,1,3,"Scenario A"  
137,1,1,2,2,3,3,3,2,2,3,1,2,4,5,"Scenario A"  
137,1,2,2,3,1,5,4,2,1,3,2,4,2,5,"Scenario A"  
138,2,1,2,2,3,2,1,1,2,3,2,1,5,4,"Scenario A"  
138,1,2,2,3,2,1,5,2,1,1,1,4,3,3,"Scenario A"  
138,2,2,1,1,2,4,5,1,2,2,2,3,1,1,"Scenario A"  
138,1,1,3,3,1,4,1,2,2,1,2,4,3,2,"Scenario A"  
138,2,1,2,1,4,2,3,1,1,3,3,1,5,3,"Scenario A"  
138,2,2,3,1,1,1,1,1,1,1,3,3,3,4,"Scenario A"  
138,1,2,1,2,3,2,4,2,1,2,2,2,5,3,"Scenario A"  
138,2,2,3,3,4,3,5,2,1,2,1,3,5,2,"Scenario A"  
138,1,2,1,1,2,4,5,2,1,3,3,4,2,4,"Scenario A"  
138,1,1,2,2,2,1,1,2,2,3,1,1,1,2,"Scenario A"  
139,1,2,2,2,4,3,2,1,1,1,3,3,4,3,"Scenario A"  
139,2,1,3,1,2,5,4,1,2,1,3,4,2,1,"Scenario B"

139,1,1,1,3,1,4,5,2,2,2,2,2,3,5,"Scenario B"  
139,2,1,2,2,1,4,1,1,2,2,1,3,1,2,"Scenario A"  
139,1,1,3,2,2,2,3,2,2,3,3,1,2,4,"Scenario A"  
139,2,1,1,1,4,1,2,1,2,3,2,2,5,3,"Scenario A"  
139,2,1,1,2,1,4,4,1,2,3,1,3,3,5,"Scenario A"  
139,2,2,2,3,3,5,4,1,2,2,3,4,4,1,"Scenario B"  
139,1,1,2,1,4,3,5,2,1,1,2,3,5,1,"Scenario B"  
139,1,1,3,1,1,1,2,2,2,3,3,2,4,1,"Scenario B"  
140,2,1,2,3,1,3,1,1,2,1,1,1,2,2,"Scenario A"  
140,1,1,2,1,2,2,3,2,2,3,2,4,1,2,"Scenario A"  
140,2,1,3,2,3,5,5,1,2,1,3,4,4,4,"Scenario A"  
140,1,2,3,3,1,4,3,2,1,1,1,2,1,4,"Scenario A"  
140,1,1,2,1,4,5,5,2,2,1,2,3,4,1,"Scenario B"  
140,2,1,2,3,1,1,3,1,2,2,1,2,3,1,"Scenario A"  
140,1,2,1,2,1,3,4,2,1,3,3,3,5,1,"Scenario A"  
140,2,2,3,2,1,1,5,1,1,2,3,4,2,2,"Scenario A"  
140,2,2,3,1,2,4,2,1,1,1,2,2,2,5,"Scenario A"  
140,2,2,1,1,3,3,4,1,1,2,3,1,3,5,"Scenario B"  
374,1,1,3,3,3,1,2,1,2,2,3,2,2,5,"Scenario A"  
374,1,2,3,2,1,1,4,2,1,2,3,4,5,3,"Scenario A"  
374,2,2,1,2,3,4,2,1,1,3,1,1,4,5,"Scenario B"  
374,1,2,1,1,3,2,1,2,1,1,2,4,3,1,"Scenario A"  
374,1,2,2,2,2,3,2,2,2,3,1,4,5,1,"Scenario A"  
374,2,1,2,1,2,1,4,1,1,1,3,2,5,2,"Scenario A"  
374,2,1,1,3,1,2,1,1,2,3,2,4,3,4,"Scenario B"  
374,1,1,3,3,1,5,2,2,2,2,1,3,1,3,"Scenario B"  
374,1,1,2,2,3,3,3,2,2,3,1,2,4,5,"Scenario A"  
374,1,2,2,3,1,5,4,2,1,3,2,4,2,5,"Scenario A"  
372,2,1,2,2,3,2,1,1,2,3,2,1,5,4,"Scenario A"  
372,1,2,2,3,2,1,5,2,1,1,1,4,3,3,"Scenario A"  
372,2,2,1,1,2,2,4,5,1,2,2,2,3,1,1,"Scenario A"  
372,1,1,3,3,1,4,1,2,2,1,2,4,3,2,"Scenario A"  
372,2,1,2,1,4,2,3,1,1,3,3,1,5,3,"Scenario B"  
372,2,2,3,1,1,1,1,1,1,1,3,3,3,4,"Scenario B"  
372,1,2,1,2,3,2,4,2,1,2,2,2,5,3,"Scenario A"  
372,2,2,3,3,4,3,5,2,1,2,1,3,5,2,"Scenario A"  
372,1,2,1,1,2,4,5,2,1,3,3,4,2,4,"Scenario A"  
372,1,1,2,2,2,1,1,2,2,3,1,1,1,2,"Scenario A"  
342,1,2,2,2,4,3,2,1,1,1,3,3,4,3,"Scenario A"  
342,2,1,3,1,2,5,4,1,2,1,3,4,2,1,"Scenario A"  
342,1,1,1,3,1,4,5,2,2,2,2,2,3,5,"Scenario A"  
342,2,1,2,2,1,4,1,1,2,2,1,3,1,2,"Scenario B"  
342,1,1,3,2,2,2,3,2,2,3,3,1,2,4,"Scenario B"  
342,2,1,1,1,4,1,2,1,2,3,2,2,5,3,"Scenario B"  
342,2,1,1,2,1,4,4,1,2,3,1,3,3,5,"Scenario A"  
342,2,2,2,3,3,5,4,1,2,2,3,4,4,1,"Scenario A"  
342,1,1,2,1,4,3,5,2,1,1,2,3,5,1,"Scenario B"  
342,1,1,3,1,1,1,2,2,2,3,3,2,4,1,"Scenario B"  
367,2,1,2,3,1,3,1,1,2,1,1,1,2,2,"Scenario A"  
367,1,1,2,1,2,2,3,2,2,3,2,4,1,2,"Scenario A"  
367,2,1,3,2,3,5,5,1,2,1,3,4,4,4,"Scenario B"  
367,1,2,3,3,1,4,3,2,1,1,1,2,1,4,"Scenario B"  
367,1,1,2,1,4,5,5,2,2,1,2,3,4,1,"Scenario B"  
367,2,1,2,3,1,1,3,1,2,2,1,2,3,1,"Scenario B"  
367,1,2,1,2,1,3,4,2,1,3,3,3,5,1,"Scenario A"  
367,2,2,3,2,1,1,5,1,1,2,3,4,2,2,"Scenario A"  
367,2,2,3,1,2,4,2,1,1,1,2,2,2,5,"Scenario B"

367,2,2,1,1,3,3,4,1,1,2,3,1,3,5,"Scenario A"  
339,1,1,3,3,3,1,2,1,2,2,3,2,2,5,"Scenario A"  
339,1,2,3,2,1,1,4,2,1,2,3,4,5,3,"Scenario A"  
339,2,2,1,2,3,4,2,1,1,3,1,1,4,5,"Scenario A"  
339,1,2,1,1,3,2,1,2,1,1,2,4,3,1,"Scenario A"  
339,1,2,2,2,2,3,2,2,2,3,1,4,5,1,"Scenario B"  
339,2,1,2,1,2,1,4,1,1,1,3,2,5,2,"Scenario A"  
339,2,1,1,3,1,2,1,1,2,3,2,4,3,4,"Scenario A"  
339,1,1,3,3,1,5,2,2,2,2,1,3,1,3,"Scenario A"  
339,1,1,2,2,3,3,3,2,2,3,1,2,4,5,"Scenario B"  
339,1,2,2,3,1,5,4,2,1,3,2,4,2,5,"Scenario A"  
61,2,1,2,2,3,2,1,1,2,3,2,1,5,4,"Scenario A"  
61,1,2,2,3,2,1,5,2,1,1,1,4,3,3,"Scenario B"  
61,2,2,1,1,2,4,5,1,2,2,2,3,1,1,"Scenario B"  
61,1,1,3,3,1,4,1,2,2,1,2,4,3,2,"Scenario A"  
61,2,1,2,1,4,2,3,1,1,3,3,1,5,3,"Scenario A"  
61,2,2,3,1,1,1,1,1,1,1,3,3,3,4,"Scenario A"  
61,1,2,1,2,3,2,4,2,1,2,2,2,5,3,"Scenario B"  
61,2,2,3,3,4,3,5,2,1,2,1,3,5,2,"Scenario B"  
61,1,2,1,1,2,4,5,2,1,3,3,4,2,4,"Scenario B"  
61,1,1,2,2,2,1,1,2,2,3,1,1,1,2,"Scenario A"  
67,1,2,2,2,4,3,2,1,1,1,3,3,4,3,"Scenario A"  
67,2,1,3,1,2,5,4,1,2,1,3,4,2,1,"Scenario B"  
67,1,1,1,3,1,4,5,2,2,2,2,2,3,5,"Scenario B"  
67,2,1,2,2,1,4,1,1,2,2,1,3,1,2,"Scenario B"  
67,1,1,3,2,2,2,3,2,2,3,3,1,2,4,"Scenario B"  
67,2,1,1,1,4,1,2,1,2,3,2,2,5,3,"Scenario A"  
67,2,1,1,2,1,4,4,1,2,3,1,3,3,5,"Scenario B"  
67,2,2,2,3,3,5,4,1,2,2,3,4,4,1,"Scenario B"  
67,1,1,2,1,4,3,5,2,1,1,2,3,5,1,"Scenario B"  
67,1,1,3,1,1,1,1,2,2,2,3,3,2,4,1,"Scenario B"  
64,2,1,2,3,1,3,1,1,2,1,1,1,2,2,"Scenario A"  
64,1,1,2,1,2,2,3,2,2,3,2,4,1,2,"Scenario B"  
64,2,1,3,2,3,5,5,1,2,1,3,4,4,4,"Scenario A"  
64,1,2,3,3,1,4,3,2,1,1,1,2,1,4,"Scenario B"  
64,1,1,2,1,4,5,5,2,2,1,2,3,4,1,"Scenario B"  
64,2,1,2,3,1,1,3,1,2,2,1,2,3,1,"Scenario B"  
64,1,2,1,2,1,3,4,2,1,3,3,3,5,1,"Scenario A"  
64,2,2,3,2,1,1,5,1,1,2,3,4,2,2,"Scenario B"  
64,2,2,3,1,2,4,2,1,1,1,2,2,2,5,"Scenario B"  
64,2,2,1,1,3,3,4,1,1,2,3,1,3,5,"Scenario A"  
6,1,1,3,3,3,1,2,1,2,2,3,2,2,5,"Scenario A"  
6,1,2,3,2,1,1,4,2,1,2,3,4,5,3,"Scenario B"  
6,2,2,1,2,3,4,2,1,1,3,1,1,4,5,"Scenario A"  
6,1,2,1,1,3,2,1,2,1,1,2,4,3,1,"Scenario A"  
6,1,2,2,2,2,3,2,2,2,3,1,4,5,1,"Scenario B"  
6,2,1,2,1,2,1,4,1,1,1,3,2,5,2,"Scenario B"  
6,2,1,1,3,1,2,1,1,2,3,2,4,3,4,"Scenario A"  
6,1,1,3,3,1,5,2,2,2,2,1,3,1,3,"Scenario A"  
6,1,1,2,2,3,3,3,2,2,3,1,2,4,5,"Scenario A"  
6,1,2,2,3,1,5,4,2,1,3,2,4,2,5,"Scenario A"  
10,2,1,2,2,3,2,1,1,2,3,2,1,5,4,"Scenario B"  
10,1,2,2,3,2,1,5,2,1,1,1,4,3,3,"Scenario A"  
10,2,2,1,1,2,4,5,1,2,2,2,3,1,1,"Scenario A"  
10,1,1,3,3,1,4,1,2,2,1,2,4,3,2,"Scenario A"  
10,2,1,2,1,4,2,3,1,1,3,3,1,5,3,"Scenario B"  
10,2,2,3,1,1,1,1,1,1,1,3,3,3,4,"Scenario A"

10,1,2,1,2,3,2,4,2,1,2,2,2,5,3,"Scenario B"  
10,2,2,3,3,4,3,5,2,1,2,1,3,5,2,"Scenario B"  
10,1,2,1,1,2,4,5,2,1,3,3,4,2,4,"Scenario A"  
10,1,1,2,2,2,1,1,2,2,3,1,1,1,2,"Scenario B"  
8,1,2,2,2,4,3,2,1,1,1,3,3,4,3,"Scenario B"  
8,2,1,3,1,2,5,4,1,2,1,3,4,2,1,"Scenario A"  
8,1,1,1,3,1,4,5,2,2,2,2,2,3,5,"Scenario A"  
8,2,1,2,2,1,4,1,1,2,2,1,3,1,2,"Scenario A"  
8,1,1,3,2,2,2,3,2,2,3,3,1,2,4,"Scenario B"  
8,2,1,1,1,4,1,2,1,2,3,2,2,5,3,"Scenario B"  
8,2,1,1,2,1,4,4,1,2,3,1,3,3,5,"Scenario A"  
8,2,2,2,3,3,5,4,1,2,2,3,4,4,1,"Scenario A"  
8,1,1,2,1,4,3,5,2,1,1,2,3,5,1,"Scenario B"  
8,1,1,3,1,1,1,2,2,2,3,3,2,4,1,"Scenario A"  
9,2,1,2,3,1,3,1,1,2,1,1,1,2,2,"Scenario A"  
9,1,1,2,1,2,2,3,2,2,3,2,4,1,2,"Scenario A"  
9,2,1,3,2,3,5,5,1,2,1,3,4,4,4,"Scenario A"  
9,1,2,3,3,1,4,3,2,1,1,1,2,1,4,"Scenario A"  
9,1,1,2,1,4,5,5,2,2,1,2,3,4,1,"Scenario B"  
9,2,1,2,3,1,1,3,1,2,2,1,2,3,1,"Scenario A"  
9,1,2,1,2,1,3,4,2,1,3,3,3,5,1,"Scenario A"  
9,2,2,3,2,1,1,5,1,1,2,3,4,2,2,"Scenario A"  
9,2,2,3,1,2,4,2,1,1,1,2,2,2,5,"Scenario A"  
9,2,2,1,1,3,3,4,1,1,2,3,1,3,5,"Scenario B"  
5,1,1,3,3,3,1,2,1,2,2,3,2,2,5,"Scenario A"  
5,1,2,3,2,1,1,4,2,1,2,3,4,5,3,"Scenario B"  
5,2,2,1,2,3,4,2,1,1,3,1,1,4,5,"Scenario A"  
5,1,2,1,1,3,2,1,2,1,1,2,4,3,1,"Scenario A"  
5,1,2,2,2,2,3,2,2,2,3,1,4,5,1,"Scenario B"  
5,2,1,2,1,2,1,4,1,1,1,1,3,2,5,2,"Scenario B"  
5,2,1,1,3,1,2,1,1,2,3,2,4,3,4,"Scenario A"  
5,1,1,3,3,1,5,2,2,2,2,1,3,1,3,"Scenario A"  
5,1,1,2,2,3,3,3,2,2,3,1,2,4,5,"Scenario A"  
5,1,2,2,3,1,5,4,2,1,3,2,4,2,5,"Scenario A"  
65,2,1,2,2,3,2,1,1,2,3,2,1,5,4,"Scenario A"  
65,1,2,2,3,2,1,5,2,1,1,1,4,3,3,"Scenario B"  
65,2,2,1,1,2,4,5,1,2,2,2,3,1,1,"Scenario B"  
65,1,1,3,3,1,4,1,2,2,1,2,4,3,2,"Scenario A"  
65,2,1,2,1,4,2,3,1,1,3,3,1,5,3,"Scenario A"  
65,2,2,3,1,1,1,1,1,1,1,3,3,3,4,"Scenario A"  
65,1,2,1,2,3,2,4,2,1,2,2,2,5,3,"Scenario B"  
65,2,2,3,3,4,3,5,2,1,2,1,3,5,2,"Scenario B"  
65,1,2,1,1,2,4,5,2,1,3,3,4,2,4,"Scenario B"  
65,1,1,2,2,2,1,1,2,2,3,1,1,1,2,"Scenario A"  
66,1,2,2,2,4,3,2,1,1,1,3,3,4,3,"Scenario A"  
66,2,1,3,1,2,5,4,1,2,1,3,4,2,1,"Scenario B"  
66,1,1,1,3,1,4,5,2,2,2,2,2,3,5,"Scenario B"  
66,2,1,2,2,1,4,1,1,2,2,1,3,1,2,"Scenario A"  
66,1,1,3,2,2,2,3,2,2,3,3,1,2,4,"Scenario A"  
66,2,1,1,1,4,1,2,1,2,3,2,2,5,3,"Scenario A"  
66,2,1,1,2,1,4,4,1,2,3,1,3,3,5,"Scenario A"  
66,2,2,2,3,3,5,4,1,2,2,3,4,4,1,"Scenario B"  
66,1,1,2,1,4,3,5,2,1,1,2,3,5,1,"Scenario B"  
66,1,1,3,1,1,1,2,2,2,3,3,2,4,1,"Scenario B"  
395,2,1,2,3,1,3,1,1,2,1,1,1,2,2,"Scenario B"  
395,1,1,2,1,2,2,3,2,2,3,2,4,1,2,"Scenario B"  
395,2,1,3,2,3,5,5,1,2,1,3,4,4,4,"Scenario A"

395,1,2,3,3,1,4,3,2,1,1,1,2,1,4,"Scenario A"  
395,1,1,2,1,4,5,5,2,2,1,2,3,4,1,"Scenario A"  
395,2,1,2,3,1,1,3,1,2,2,1,2,3,1,"Scenario A"  
395,1,2,1,2,1,3,4,2,1,3,3,3,5,1,"Scenario B"  
395,2,2,3,2,1,1,5,1,1,2,3,4,2,2,"Scenario A"  
395,2,2,3,1,2,4,2,1,1,1,2,2,2,5,"Scenario A"  
395,2,2,1,1,3,3,4,1,1,2,3,1,3,5,"Scenario B"  
181,1,1,3,3,3,1,2,1,2,2,3,2,2,5,"Scenario A"  
181,1,2,3,2,1,1,4,2,1,2,3,4,5,3,"Scenario A"  
181,2,2,1,2,3,4,2,1,1,3,1,1,4,5,"Scenario A"  
181,1,2,1,1,3,2,1,2,1,1,2,4,3,1,"Scenario A"  
181,1,2,2,2,2,3,2,2,2,3,1,4,5,1,"Scenario A"  
181,2,1,2,1,2,2,1,4,1,1,1,3,2,5,2,"Scenario B"  
181,2,1,1,3,1,2,1,1,2,3,2,4,3,4,"Scenario B"  
181,1,1,3,3,1,5,2,2,2,2,1,3,1,3,"Scenario A"  
181,1,1,2,2,3,3,3,2,2,3,1,2,4,5,"Scenario B"  
181,1,2,2,3,1,5,4,2,1,3,2,4,2,5,"Scenario A"  
177,2,1,2,2,3,2,1,1,2,3,2,1,5,4,"Scenario A"  
177,1,2,2,3,2,1,5,2,1,1,1,4,3,3,"Scenario B"  
177,2,2,1,1,2,4,5,1,2,2,2,3,1,1,"Scenario B"  
177,1,1,3,3,1,4,1,2,2,1,2,4,3,2,"Scenario A"  
177,2,1,2,1,4,2,3,1,1,3,3,1,5,3,"Scenario B"  
177,2,2,3,1,1,1,1,1,1,1,3,3,3,4,"Scenario A"  
177,1,2,1,2,3,2,4,2,1,2,2,2,5,3,"Scenario B"  
177,2,2,3,3,4,3,5,2,1,2,1,3,5,2,"Scenario B"  
177,1,2,1,1,2,4,5,2,1,3,3,4,2,4,"Scenario A"  
177,1,1,2,2,2,1,1,2,2,3,1,1,1,2,"Scenario A"  
397,1,2,2,2,4,3,2,1,1,1,3,3,4,3,"Scenario A"  
397,2,1,3,1,2,5,4,1,2,1,3,4,2,1,"Scenario A"  
397,1,1,1,3,1,4,5,2,2,2,2,2,3,5,"Scenario B"  
397,2,1,2,2,1,4,1,1,2,2,1,3,1,2,"Scenario A"  
397,1,1,3,2,2,2,3,2,2,3,3,1,2,4,"Scenario A"  
397,2,1,1,1,4,1,2,1,2,3,2,2,5,3,"Scenario B"  
397,2,1,1,2,1,4,4,1,2,3,1,3,3,5,"Scenario A"  
397,2,2,2,3,3,5,4,1,2,2,3,4,4,1,"Scenario B"  
397,1,1,2,1,4,3,5,2,1,1,2,3,5,1,"Scenario A"  
397,1,1,3,1,1,1,2,2,2,3,3,2,4,1,"Scenario A"  
179,2,1,2,3,1,3,1,1,2,1,1,1,2,2,"Scenario A"  
179,1,1,2,1,2,2,3,2,2,3,2,4,1,2,"Scenario B"  
179,2,1,3,2,3,5,5,1,2,1,3,4,4,4,"Scenario B"  
179,1,2,3,3,1,4,3,2,1,1,1,2,1,4,"Scenario B"  
179,1,1,2,1,4,5,5,2,2,1,2,3,4,1,"Scenario B"  
179,2,1,2,3,1,1,3,1,2,2,1,2,3,1,"Scenario A"  
179,1,2,1,2,1,3,4,2,1,3,3,3,5,1,"Scenario A"  
179,2,2,3,2,1,1,5,1,1,2,3,4,2,2,"Scenario B"  
179,2,2,3,1,2,4,2,1,1,1,2,2,2,5,"Scenario B"  
179,2,2,1,1,3,3,4,1,1,2,3,1,3,5,"Scenario A"  
82,1,1,3,3,3,1,2,1,2,2,3,2,2,5,"Scenario A"  
82,1,2,3,2,1,1,4,2,1,2,3,4,5,3,"Scenario B"  
82,2,2,1,2,3,4,2,1,1,3,1,1,4,5,"Scenario A"  
82,1,2,1,1,3,2,1,2,1,1,2,4,3,1,"Scenario B"  
82,1,2,2,2,2,3,2,2,2,3,1,4,5,1,"Scenario B"  
82,2,1,2,1,2,1,4,1,1,1,3,2,5,2,"Scenario B"  
82,2,1,1,3,1,2,1,1,2,3,2,4,3,4,"Scenario A"  
82,1,1,3,3,1,5,2,2,2,2,1,3,1,3,"Scenario A"  
82,1,1,2,2,3,3,3,2,2,3,1,2,4,5,"Scenario A"  
82,1,2,2,3,1,5,4,2,1,3,2,4,2,5,"Scenario A"



239,2,1,2,2,3,2,1,1,2,3,2,1,5,4,"Scenario B"  
239,1,2,2,3,2,1,5,2,1,1,1,4,3,3,"Scenario A"  
239,2,2,1,1,2,4,5,1,2,2,2,3,1,1,"Scenario A"  
239,1,1,3,3,1,4,1,2,2,1,2,4,3,2,"Scenario A"  
239,2,1,2,1,4,2,3,1,1,3,3,1,5,3,"Scenario B"  
239,2,2,3,1,1,1,1,1,1,1,3,3,3,4,"Scenario A"  
239,1,2,1,2,3,2,4,2,1,2,2,2,5,3,"Scenario B"  
239,2,2,3,3,4,3,5,2,1,2,1,3,5,2,"Scenario B"  
239,1,2,1,1,2,4,5,2,1,3,3,4,2,4,"Scenario A"  
239,1,1,2,2,2,1,1,2,2,3,1,1,1,2,"Scenario B"  
83,1,2,2,2,4,3,2,1,1,1,3,3,4,3,"Scenario A"  
83,2,1,3,1,2,5,4,1,2,1,3,4,2,1,"Scenario A"  
83,1,1,1,3,1,4,5,2,2,2,2,2,3,5,"Scenario B"  
83,2,1,2,2,1,4,1,1,2,2,1,3,1,2,"Scenario A"  
83,1,1,3,2,2,2,3,2,2,3,3,1,2,4,"Scenario A"  
83,2,1,1,1,4,1,2,1,2,3,2,2,5,3,"Scenario A"  
83,2,1,1,2,1,4,4,1,2,3,1,3,3,5,"Scenario A"  
83,2,2,2,3,3,5,4,1,2,2,3,4,4,1,"Scenario B"  
83,1,1,2,1,4,3,5,2,1,1,2,3,5,1,"Scenario B"  
83,1,1,3,1,1,1,2,2,2,3,3,2,4,1,"Scenario B"  
267,2,1,2,3,1,3,1,1,2,1,1,1,2,2,"Scenario A"  
267,1,1,2,1,2,2,3,2,2,3,2,4,1,2,"Scenario A"  
267,2,1,3,2,3,5,5,1,2,1,3,4,4,4,"Scenario A"  
267,1,2,3,3,1,4,3,2,1,1,1,2,1,4,"Scenario A"  
267,1,1,2,1,4,5,5,2,2,1,2,3,4,1,"Scenario B"  
267,2,1,2,3,1,1,3,1,2,2,1,2,3,1,"Scenario A"  
267,1,2,1,2,1,3,4,2,1,3,3,3,5,1,"Scenario A"  
267,2,2,3,2,1,1,5,1,1,2,3,4,2,2,"Scenario A"  
267,2,2,3,1,2,4,2,1,1,1,2,2,2,5,"Scenario A"  
267,2,2,1,1,3,3,4,1,1,2,3,1,3,5,"Scenario B"  
240,1,1,3,3,3,1,2,1,2,2,3,2,2,5,"Scenario B"  
240,1,2,3,2,1,1,4,2,1,2,3,4,5,3,"Scenario A"  
240,2,2,1,2,3,4,2,1,1,3,1,1,4,5,"Scenario B"  
240,1,2,1,1,3,2,1,2,1,1,2,4,3,1,"Scenario A"  
240,1,2,2,2,2,3,2,2,2,3,1,4,5,1,"Scenario A"  
240,2,1,2,1,2,1,4,1,1,1,3,2,5,2,"Scenario A"  
240,2,1,1,3,1,2,1,1,2,3,2,4,3,4,"Scenario A"  
240,1,1,3,3,1,5,2,2,2,2,1,3,1,3,"Scenario A"  
240,1,1,2,2,3,3,3,2,2,3,1,2,4,5,"Scenario B"  
240,1,2,2,3,1,5,4,2,1,3,2,4,2,5,"Scenario A"  
84,2,1,2,2,3,2,1,1,2,3,2,1,5,4,"Scenario A"  
84,1,2,2,3,2,1,5,2,1,1,1,4,3,3,"Scenario B"  
84,2,2,1,1,2,4,5,1,2,2,2,3,1,1,"Scenario A"  
84,1,1,3,3,1,4,1,2,2,1,2,4,3,2,"Scenario A"  
84,2,1,2,1,4,2,3,1,1,3,3,1,5,3,"Scenario B"  
84,2,2,3,1,1,1,1,1,1,1,3,3,3,4,"Scenario B"  
84,1,2,1,2,3,2,4,2,1,2,2,2,5,3,"Scenario A"  
84,2,2,3,3,4,3,5,2,1,2,1,3,5,2,"Scenario A"  
84,1,2,1,1,2,4,5,2,1,3,3,4,2,4,"Scenario A"  
84,1,1,2,2,2,1,1,2,2,3,1,1,1,2,"Scenario A"  
269,1,2,2,2,4,3,2,1,1,1,3,3,4,3,"Scenario A"  
269,2,1,3,1,2,5,4,1,2,1,3,4,2,1,"Scenario A"  
269,1,1,1,3,1,4,5,2,2,2,2,2,3,5,"Scenario A"  
269,2,1,2,2,1,4,1,1,2,2,1,3,1,2,"Scenario A"  
269,1,1,3,2,2,2,3,2,2,3,3,1,2,4,"Scenario B"  
269,2,1,1,1,4,1,2,1,2,3,2,2,5,3,"Scenario B"  
269,2,1,1,2,1,4,4,1,2,3,1,3,3,5,"Scenario B"

269,2,2,2,3,3,5,4,1,2,2,3,4,4,1,"Scenario B"  
269,1,1,2,1,4,3,5,2,1,1,2,3,5,1,"Scenario B"  
269,1,1,3,1,1,1,2,2,2,3,3,2,4,1,"Scenario B"  
85,2,1,2,3,1,3,1,1,2,1,1,1,2,2,"Scenario A"  
85,1,1,2,1,2,2,3,2,2,3,2,4,1,2,"Scenario B"  
85,2,1,3,2,3,5,5,1,2,1,3,4,4,4,"Scenario A"  
85,1,2,3,3,1,4,3,2,1,1,1,2,1,4,"Scenario A"  
85,1,1,2,1,4,5,5,2,2,1,2,3,4,1,"Scenario B"  
85,2,1,2,3,1,1,3,1,2,2,1,2,3,1,"Scenario A"  
85,1,2,1,2,1,3,4,2,1,3,3,3,5,1,"Scenario B"  
85,2,2,3,2,1,1,5,1,1,2,3,4,2,2,"Scenario A"  
85,2,2,3,1,2,4,2,1,1,1,2,2,2,5,"Scenario A"  
85,2,2,1,1,3,3,4,1,1,2,3,1,3,5,"Scenario B"  
86,1,1,3,3,3,1,2,1,2,2,3,2,2,5,"Scenario A"  
86,1,2,3,2,1,1,4,2,1,2,3,4,5,3,"Scenario A"  
86,2,2,1,2,3,4,2,1,1,3,1,1,4,5,"Scenario A"  
86,1,2,1,1,3,2,1,2,1,1,2,4,3,1,"Scenario B"  
86,1,2,2,2,2,3,2,2,2,3,1,4,5,1,"Scenario A"  
86,2,1,2,1,2,1,4,1,1,1,3,2,5,2,"Scenario A"  
86,2,1,1,3,1,2,1,1,2,3,2,4,3,4,"Scenario B"  
86,1,1,3,3,1,5,2,2,2,2,1,3,1,3,"Scenario B"  
86,1,1,2,2,3,3,3,2,2,3,1,2,4,5,"Scenario B"  
86,1,2,2,3,1,5,4,2,1,3,2,4,2,5,"Scenario B"  
295,2,1,2,2,3,2,1,1,2,3,2,1,5,4,"Scenario A"  
295,1,2,2,3,2,1,5,2,1,1,1,4,3,3,"Scenario A"  
295,2,2,1,1,2,4,5,1,2,2,2,3,1,1,"Scenario A"  
295,1,1,3,3,1,4,1,2,2,1,2,4,3,2,"Scenario A"  
295,2,1,2,1,4,2,3,1,1,3,3,1,5,3,"Scenario B"  
295,2,2,3,1,1,1,1,1,1,1,1,3,3,3,4,"Scenario A"  
295,1,2,1,2,3,2,4,2,1,2,2,2,5,3,"Scenario A"  
295,2,2,3,3,4,3,5,2,1,2,1,3,5,2,"Scenario A"  
295,1,2,1,1,2,4,5,2,1,3,3,4,2,4,"Scenario A"  
295,1,1,2,2,2,1,1,2,2,3,1,1,1,2,"Scenario B"  
87,1,2,2,2,4,3,2,1,1,1,3,3,4,3,"Scenario A"  
87,2,1,3,1,2,5,4,1,2,1,3,4,2,1,"Scenario B"  
87,1,1,1,3,1,4,5,2,2,2,2,2,3,5,"Scenario B"  
87,2,1,2,2,1,4,1,1,2,2,1,3,1,2,"Scenario A"  
87,1,1,3,2,2,2,3,2,2,3,3,1,2,4,"Scenario A"  
87,2,1,1,1,4,1,2,1,2,3,2,2,5,3,"Scenario B"  
87,2,1,1,2,1,4,4,1,2,3,1,3,3,5,"Scenario B"  
87,2,2,2,3,3,5,4,1,2,2,3,4,4,1,"Scenario B"  
87,1,1,2,1,4,3,5,2,1,1,2,3,5,1,"Scenario B"  
87,1,1,3,1,1,1,2,2,2,3,3,2,4,1,"Scenario B"  
238,2,1,2,3,1,3,1,1,2,1,1,1,2,2,"Scenario A"  
238,1,1,2,1,2,2,3,2,2,3,2,4,1,2,"Scenario B"  
238,2,1,3,2,3,5,5,1,2,1,3,4,4,4,"Scenario B"  
238,1,2,3,3,1,4,3,2,1,1,1,2,1,4,"Scenario A"  
238,1,1,2,1,4,5,5,2,2,1,2,3,4,1,"Scenario A"  
238,2,1,2,3,1,1,3,1,2,2,1,2,3,1,"Scenario A"  
238,1,2,1,2,1,3,4,2,1,3,3,3,5,1,"Scenario A"  
238,2,2,3,2,1,1,5,1,1,2,3,4,2,2,"Scenario A"  
238,2,2,3,1,2,4,2,1,1,1,2,2,2,5,"Scenario A"  
238,2,2,1,1,3,3,4,1,1,2,3,1,3,5,"Scenario B"  
88,1,1,3,3,3,1,2,1,2,2,3,2,2,5,"Scenario A"  
88,1,2,3,2,1,1,4,2,1,2,3,4,5,3,"Scenario B"  
88,2,2,1,2,3,4,2,1,1,3,1,1,4,5,"Scenario A"  
88,1,2,1,1,3,2,1,2,1,1,2,4,3,1,"Scenario B"

88,1,2,2,2,2,3,2,2,2,3,1,4,5,1,"Scenario B"  
88,2,1,2,1,2,1,4,1,1,1,3,2,5,2,"Scenario A"  
88,2,1,1,3,1,2,1,1,2,3,2,4,3,4,"Scenario B"  
88,1,1,3,3,1,5,2,2,2,2,1,3,1,3,"Scenario B"  
88,1,1,2,2,3,3,3,2,2,3,1,2,4,5,"Scenario B"  
88,1,2,2,3,1,5,4,2,1,3,2,4,2,5,"Scenario B"  
89,2,1,2,2,3,2,1,1,2,3,2,1,5,4,"Scenario A"  
89,1,2,2,3,2,1,5,2,1,1,1,4,3,3,"Scenario B"  
89,2,2,1,1,2,4,5,1,2,2,2,3,1,1,"Scenario A"  
89,1,1,3,3,1,4,1,2,2,1,2,4,3,2,"Scenario B"  
89,2,1,2,1,4,2,3,1,1,3,3,1,5,3,"Scenario A"  
89,2,2,3,1,1,1,1,1,1,1,3,3,3,4,"Scenario A"  
89,1,2,1,2,3,2,4,2,1,2,2,2,5,3,"Scenario B"  
89,2,2,3,3,4,3,5,2,1,2,1,3,5,2,"Scenario A"  
89,1,2,1,1,2,4,5,2,1,3,3,4,2,4,"Scenario B"  
89,1,1,2,2,2,1,1,2,2,3,1,1,1,2,"Scenario B"  
268,1,2,2,2,4,3,2,1,1,1,3,3,4,3,"Scenario A"  
268,2,1,3,1,2,5,4,1,2,1,3,4,2,1,"Scenario B"  
268,1,1,1,3,1,4,5,2,2,2,2,2,3,5,"Scenario B"  
268,2,1,2,2,1,4,1,1,2,2,1,3,1,2,"Scenario B"  
268,1,1,3,2,2,2,3,2,2,3,3,1,2,4,"Scenario B"  
268,2,1,1,1,4,1,2,1,2,3,2,2,5,3,"Scenario B"  
268,2,1,1,2,1,4,4,1,2,3,1,3,3,5,"Scenario B"  
268,2,2,2,3,3,5,4,1,2,2,3,4,4,1,"Scenario A"  
268,1,1,2,1,4,3,5,2,1,1,2,3,5,1,"Scenario A"  
268,1,1,3,1,1,1,2,2,2,3,3,2,4,1,"Scenario A"  
106,2,1,2,3,1,3,1,1,2,1,1,1,2,2,"Scenario A"  
106,1,1,2,1,2,2,3,2,2,3,2,4,1,2,"Scenario B"  
106,2,1,3,2,3,5,5,1,2,1,3,4,4,4,"Scenario B"  
106,1,2,3,3,1,4,3,2,1,1,1,2,1,4,"Scenario A"  
106,1,1,2,1,4,5,5,2,2,1,2,3,4,1,"Scenario B"  
106,2,1,2,3,1,1,3,1,2,2,1,2,3,1,"Scenario B"  
106,1,2,1,2,1,3,4,2,1,3,3,3,5,1,"Scenario B"  
106,2,2,3,2,1,1,5,1,1,2,3,4,2,2,"Scenario B"  
106,2,2,3,1,2,4,2,1,1,1,2,2,2,5,"Scenario A"  
106,2,2,1,1,3,3,4,1,1,2,3,1,3,5,"Scenario A"  
107,1,1,3,3,3,1,2,1,2,2,3,2,2,5,"Scenario A"  
107,1,2,3,2,1,1,4,2,1,2,3,4,5,3,"Scenario B"  
107,2,2,1,2,3,4,2,1,1,3,1,1,4,5,"Scenario B"  
107,1,2,1,1,3,2,1,2,1,1,2,4,3,1,"Scenario A"  
107,1,2,2,2,2,3,2,2,2,3,1,4,5,1,"Scenario B"  
107,2,1,2,1,2,1,4,1,1,1,3,2,5,2,"Scenario B"  
107,2,1,1,3,1,2,1,1,2,3,2,4,3,4,"Scenario B"  
107,1,1,3,3,1,5,2,2,2,2,1,3,1,3,"Scenario B"  
107,1,1,2,2,3,3,3,2,2,3,1,2,4,5,"Scenario A"  
107,1,2,2,3,1,5,4,2,1,3,2,4,2,5,"Scenario A"  
108,2,1,2,2,3,2,1,1,2,3,2,1,5,4,"Scenario A"  
108,1,2,2,3,2,1,5,2,1,1,1,4,3,3,"Scenario B"  
108,2,2,1,1,2,4,5,1,2,2,2,3,1,1,"Scenario B"  
108,1,1,3,3,1,4,1,2,2,1,2,4,3,2,"Scenario A"  
108,2,1,2,1,4,2,3,1,1,3,3,1,5,3,"Scenario B"  
108,2,2,3,1,1,1,1,1,1,1,3,3,3,4,"Scenario B"  
108,1,2,1,2,3,2,4,2,1,2,2,2,5,3,"Scenario B"  
108,2,2,3,3,4,3,5,2,1,2,1,3,5,2,"Scenario B"  
108,1,2,1,1,2,4,5,2,1,3,3,4,2,4,"Scenario A"  
108,1,1,2,2,2,1,1,2,2,3,1,1,1,2,"Scenario A"  
109,1,2,2,2,4,3,2,1,1,1,3,3,4,3,"Scenario B"

109,2,1,3,1,2,5,4,1,2,1,3,4,2,1,"Scenario B"  
109,1,1,1,3,1,4,5,2,2,2,2,2,3,5,"Scenario A"  
109,2,1,2,2,1,4,1,1,2,2,1,3,1,2,"Scenario A"  
109,1,1,3,2,2,2,3,2,2,3,3,1,2,4,"Scenario A"  
109,2,1,1,1,4,1,2,1,2,3,2,2,5,3,"Scenario B"  
109,2,1,1,2,1,4,4,1,2,3,1,3,3,5,"Scenario A"  
109,2,2,2,3,3,5,4,1,2,2,3,4,4,1,"Scenario A"  
109,1,1,2,1,4,3,5,2,1,1,2,3,5,1,"Scenario B"  
109,1,1,3,1,1,1,2,2,2,3,3,2,4,1,"Scenario B"  
110,2,1,2,3,1,3,1,1,2,1,1,1,2,2,"Scenario A"  
110,1,1,2,1,2,2,3,2,2,3,2,4,1,2,"Scenario B"  
110,2,1,3,2,3,5,5,1,2,1,3,4,4,4,"Scenario A"  
110,1,2,3,3,1,4,3,2,1,1,1,2,1,4,"Scenario A"  
110,1,1,2,1,4,5,5,2,2,1,2,3,4,1,"Scenario B"  
110,2,1,2,3,1,1,3,1,2,2,1,2,3,1,"Scenario B"  
110,1,2,1,2,1,3,4,2,1,3,3,3,5,1,"Scenario B"  
110,2,2,3,2,1,1,5,1,1,2,3,4,2,2,"Scenario B"  
110,2,2,3,1,2,4,2,1,1,1,2,2,2,5,"Scenario A"  
110,2,2,1,1,3,3,4,1,1,2,3,1,3,5,"Scenario A"  
111,1,1,3,3,3,1,2,1,2,2,3,2,2,5,"Scenario A"  
111,1,2,3,2,1,1,4,2,1,2,3,4,5,3,"Scenario B"  
111,2,2,1,2,3,4,2,1,1,3,1,1,4,5,"Scenario A"  
111,1,2,1,1,3,2,1,2,1,1,2,4,3,1,"Scenario A"  
111,1,2,2,2,2,3,2,2,2,3,1,4,5,1,"Scenario B"  
111,2,1,2,1,2,1,4,1,1,1,3,2,5,2,"Scenario B"  
111,2,1,1,3,1,2,1,1,2,3,2,4,3,4,"Scenario A"  
111,1,1,3,3,1,5,2,2,2,2,1,3,1,3,"Scenario A"  
111,1,1,2,2,3,3,3,2,2,3,1,2,4,5,"Scenario A"  
111,1,2,2,3,1,5,4,2,1,3,2,4,2,5,"Scenario A"  
112,2,1,2,2,3,2,1,1,2,3,2,1,5,4,"Scenario B"  
112,1,2,2,3,2,1,5,2,1,1,1,4,3,3,"Scenario A"  
112,2,2,1,1,2,4,5,1,2,2,2,3,1,1,"Scenario A"  
112,1,1,3,3,1,4,1,2,2,1,2,4,3,2,"Scenario A"  
112,2,1,2,1,4,2,3,1,1,3,3,1,5,3,"Scenario B"  
112,2,2,3,1,1,1,1,1,1,1,3,3,3,4,"Scenario A"  
112,1,2,1,2,3,2,4,2,1,2,2,2,5,3,"Scenario A"  
112,2,2,3,3,4,3,5,2,1,2,1,3,5,2,"Scenario A"  
112,1,2,1,1,2,4,5,2,1,3,3,4,2,4,"Scenario A"  
112,1,1,2,2,2,1,1,2,2,3,1,1,1,2,"Scenario A"  
113,1,2,2,2,4,3,2,1,1,1,3,3,4,3,"Scenario A"  
113,2,1,3,1,2,5,4,1,2,1,3,4,2,1,"Scenario A"  
113,1,1,1,3,1,4,5,2,2,2,2,2,3,5,"Scenario B"  
113,2,1,2,2,1,4,1,1,2,2,1,3,1,2,"Scenario A"  
113,1,1,3,2,2,2,3,2,2,3,3,1,2,4,"Scenario B"  
113,2,1,1,1,4,1,2,1,2,3,2,2,5,3,"Scenario A"  
113,2,1,1,2,1,4,4,1,2,3,1,3,3,5,"Scenario B"  
113,2,2,2,3,3,5,4,1,2,2,3,4,4,1,"Scenario B"  
113,1,1,2,1,4,3,5,2,1,1,2,3,5,1,"Scenario A"  
113,1,1,3,1,1,1,2,2,2,3,3,2,4,1,"Scenario B"  
114,2,1,2,3,1,3,1,1,2,1,1,1,2,2,"Scenario A"  
114,1,1,2,1,2,2,3,2,2,3,2,4,1,2,"Scenario B"  
114,2,1,3,2,3,5,5,1,2,1,3,4,4,4,"Scenario B"  
114,1,2,3,3,1,4,3,2,1,1,1,2,1,4,"Scenario A"  
114,1,1,2,1,4,5,5,2,2,1,2,3,4,1,"Scenario B"  
114,2,1,2,3,1,1,3,1,2,2,1,2,3,1,"Scenario B"  
114,1,2,1,2,1,3,4,2,1,3,3,3,5,1,"Scenario B"  
114,2,2,3,2,1,1,5,1,1,2,3,4,2,2,"Scenario B"

114,2,2,3,1,2,4,2,1,1,1,2,2,2,5,"Scenario A"  
114,2,2,1,1,3,3,4,1,1,2,3,1,3,5,"Scenario A"  
115,1,1,3,3,3,1,2,1,2,2,3,2,2,5,"Scenario A"  
115,1,2,3,2,1,1,4,2,1,2,3,4,5,3,"Scenario B"  
115,2,2,1,2,3,4,2,1,1,3,1,1,4,5,"Scenario A"  
115,1,2,1,1,3,2,1,2,1,1,2,4,3,1,"Scenario A"  
115,1,2,2,2,2,3,2,2,2,3,1,4,5,1,"Scenario A"  
115,2,1,2,1,2,1,4,1,1,1,3,2,5,2,"Scenario B"  
115,2,1,1,3,1,2,1,1,2,3,2,4,3,4,"Scenario A"  
115,1,1,3,3,1,5,2,2,2,2,1,3,1,3,"Scenario A"  
115,1,1,2,2,3,3,3,2,2,3,1,2,4,5,"Scenario A"  
115,1,2,2,3,1,5,4,2,1,3,2,4,2,5,"Scenario A"  
31,2,1,2,2,3,2,1,1,2,3,2,1,5,4,"Scenario B"  
31,1,2,2,3,2,1,5,2,1,1,1,4,3,3,"Scenario A"  
31,2,2,1,1,2,4,5,1,2,2,2,3,1,1,"Scenario A"  
31,1,1,3,3,1,4,1,2,2,1,2,4,3,2,"Scenario A"  
31,2,1,2,1,4,2,3,1,1,3,3,1,5,3,"Scenario B"  
31,2,2,3,1,1,1,1,1,1,1,3,3,3,4,"Scenario A"  
31,1,2,1,2,3,2,4,2,1,2,2,2,5,3,"Scenario B"  
31,2,2,3,3,4,3,5,2,1,2,1,3,5,2,"Scenario A"  
31,1,2,1,1,2,4,5,2,1,3,3,4,2,4,"Scenario A"  
31,1,1,2,2,2,1,1,2,2,3,1,1,1,2,"Scenario B"  
30,1,2,2,2,4,3,2,1,1,1,3,3,4,3,"Scenario A"  
30,2,1,3,1,2,5,4,1,2,1,3,4,2,1,"Scenario A"  
30,1,1,1,3,1,4,5,2,2,2,2,2,3,5,"Scenario B"  
30,2,1,2,2,1,4,1,1,2,2,1,3,1,2,"Scenario A"  
30,1,1,3,2,2,2,3,2,2,3,3,1,2,4,"Scenario B"  
30,2,1,1,1,4,1,2,1,2,3,2,2,5,3,"Scenario B"  
30,2,1,1,2,1,4,4,1,2,3,1,3,3,5,"Scenario B"  
30,2,2,2,3,3,5,4,1,2,2,3,4,4,1,"Scenario A"  
30,1,1,2,1,4,3,5,2,1,1,2,3,5,1,"Scenario B"  
30,1,1,3,1,1,1,2,2,2,3,3,2,4,1,"Scenario B"  
462,2,1,2,3,1,3,1,1,2,1,1,1,2,2,"Scenario B"  
462,1,1,2,1,2,2,3,2,2,3,2,4,1,2,"Scenario A"  
462,2,1,3,2,3,5,5,1,2,1,3,4,4,4,"Scenario A"  
462,1,2,3,3,1,4,3,2,1,1,1,2,1,4,"Scenario A"  
462,1,1,2,1,4,5,5,2,2,1,2,3,4,1,"Scenario B"  
462,2,1,2,3,1,1,3,1,2,2,1,2,3,1,"Scenario A"  
462,1,2,1,2,1,3,4,2,1,3,3,3,5,1,"Scenario B"  
462,2,2,3,2,1,1,5,1,1,2,3,4,2,2,"Scenario B"  
462,2,2,3,1,2,4,2,1,1,1,2,2,2,5,"Scenario A"  
462,2,2,1,1,3,3,4,1,1,2,3,1,3,5,"Scenario A"  
424,1,1,3,3,3,1,2,1,2,2,3,2,2,5,"Scenario B"  
424,1,2,3,2,1,1,4,2,1,2,3,4,5,3,"Scenario A"  
424,2,2,1,2,3,4,2,1,1,3,1,1,4,5,"Scenario B"  
424,1,2,1,1,3,2,1,2,1,1,2,4,3,1,"Scenario B"  
424,1,2,2,2,2,3,2,2,2,3,1,4,5,1,"Scenario A"  
424,2,1,2,1,2,1,4,1,1,1,1,3,2,5,2,"Scenario A"  
424,2,1,1,3,1,2,1,1,2,3,2,4,3,4,"Scenario A"  
424,1,1,3,3,1,5,2,2,2,2,1,3,1,3,"Scenario B"  
424,1,1,2,2,3,3,3,2,2,3,1,2,4,5,"Scenario A"  
424,1,2,2,3,1,5,4,2,1,3,2,4,2,5,"Scenario B"  
28,2,1,2,2,3,2,1,1,2,3,2,1,5,4,"Scenario B"  
28,1,2,2,3,2,1,5,2,1,1,1,4,3,3,"Scenario A"  
28,2,2,1,1,2,4,5,1,2,2,2,3,1,1,"Scenario B"  
28,1,1,3,3,1,4,1,2,2,1,2,4,3,2,"Scenario A"  
28,2,1,2,1,4,2,3,1,1,3,3,1,5,3,"Scenario B"

28,2,2,3,1,1,1,1,1,1,1,3,3,3,4,"Scenario A"  
28,1,2,1,2,3,2,4,2,1,2,2,2,5,3,"Scenario B"  
28,2,2,3,3,4,3,5,2,1,2,1,3,5,2,"Scenario A"  
28,1,2,1,1,2,4,5,2,1,3,3,4,2,4,"Scenario B"  
28,1,1,2,2,2,1,1,2,2,3,1,1,1,2,"Scenario B"  
401,1,2,2,2,4,3,2,1,1,1,3,3,4,3,"Scenario A"  
401,2,1,3,1,2,5,4,1,2,1,3,4,2,1,"Scenario A"  
401,1,1,1,3,1,4,5,2,2,2,2,2,3,5,"Scenario A"  
401,2,1,2,2,1,4,1,1,2,2,1,3,1,2,"Scenario B"  
401,1,1,3,2,2,2,3,2,2,3,3,1,2,4,"Scenario A"  
401,2,1,1,1,4,1,2,1,2,3,2,2,5,3,"Scenario B"  
401,2,1,1,2,1,4,4,1,2,3,1,3,3,5,"Scenario A"  
401,2,2,2,3,3,5,4,1,2,2,3,4,4,1,"Scenario A"  
401,1,1,2,1,4,3,5,2,1,1,2,3,5,1,"Scenario A"  
401,1,1,3,1,1,1,2,2,2,3,3,2,4,1,"Scenario A"  
427,2,1,2,3,1,3,1,1,2,1,1,1,2,2,"Scenario A"  
427,1,1,2,1,2,2,3,2,2,3,2,4,1,2,"Scenario B"  
427,2,1,3,2,3,5,5,1,2,1,3,4,4,4,"Scenario B"  
427,1,2,3,3,1,4,3,2,1,1,1,2,1,4,"Scenario A"  
427,1,1,2,1,4,5,5,2,2,1,2,3,4,1,"Scenario A"  
427,2,1,2,3,1,1,3,1,2,2,1,2,3,1,"Scenario A"  
427,1,2,1,2,1,3,4,2,1,3,3,3,5,1,"Scenario B"  
427,2,2,3,2,1,1,5,1,1,2,3,4,2,2,"Scenario B"  
427,2,2,3,1,2,4,2,1,1,1,2,2,2,5,"Scenario B"  
427,2,2,1,1,3,3,4,1,1,2,3,1,3,5,"Scenario B"  
433,1,1,3,3,3,1,2,1,2,2,3,2,2,5,"Scenario A"  
433,1,2,3,2,1,1,4,2,1,2,3,4,5,3,"Scenario B"  
433,2,2,1,2,3,4,2,1,1,3,1,1,4,5,"Scenario B"  
433,1,2,1,1,3,2,1,2,1,1,2,4,3,1,"Scenario A"  
433,1,2,2,2,2,3,2,2,2,3,1,4,5,1,"Scenario A"  
433,2,1,2,1,2,1,4,1,1,1,3,2,5,2,"Scenario A"  
433,2,1,1,3,1,2,1,1,2,3,2,4,3,4,"Scenario B"  
433,1,1,3,3,1,5,2,2,2,2,1,3,1,3,"Scenario B"  
433,1,1,2,2,3,3,3,2,2,3,1,2,4,5,"Scenario B"  
433,1,2,2,3,1,5,4,2,1,3,2,4,2,5,"Scenario A"  
428,2,1,2,2,3,2,1,1,2,3,2,1,5,4,"Scenario B"  
428,1,2,2,3,2,1,5,2,1,1,1,4,3,3,"Scenario B"  
428,2,2,1,1,2,4,5,1,2,2,2,3,1,1,"Scenario A"  
428,1,1,3,3,1,4,1,2,2,1,2,4,3,2,"Scenario A"  
428,2,1,2,1,4,2,3,1,1,3,3,1,5,3,"Scenario B"  
428,2,2,3,1,1,1,1,1,1,1,3,3,3,4,"Scenario A"  
428,1,2,1,2,3,2,4,2,1,2,2,2,5,3,"Scenario A"  
428,2,2,3,3,4,3,5,2,1,2,1,3,5,2,"Scenario A"  
428,1,2,1,1,2,4,5,2,1,3,3,4,2,4,"Scenario A"  
428,1,1,2,2,2,1,1,2,2,3,1,1,1,2,"Scenario A"  
29,1,2,2,2,4,3,2,1,1,1,3,3,4,3,"Scenario A"  
29,2,1,3,1,2,5,4,1,2,1,3,4,2,1,"Scenario A"  
29,1,1,1,3,1,4,5,2,2,2,2,2,3,5,"Scenario A"  
29,2,1,2,2,1,4,1,1,2,2,1,3,1,2,"Scenario A"  
29,1,1,3,2,2,2,3,2,2,3,3,1,2,4,"Scenario B"  
29,2,1,1,1,4,1,2,1,2,3,2,2,5,3,"Scenario B"  
29,2,1,1,2,1,4,4,1,2,3,1,3,3,5,"Scenario A"  
29,2,2,2,3,3,5,4,1,2,2,3,4,4,1,"Scenario A"  
29,1,1,2,1,4,3,5,2,1,1,2,3,5,1,"Scenario B"  
29,1,1,3,1,1,1,2,2,2,3,3,2,4,1,"Scenario A"  
387,2,1,2,3,1,3,1,1,2,1,1,1,2,2,"Scenario A"  
387,1,1,2,1,2,2,3,2,2,3,2,4,1,2,"Scenario A"

387,2,1,3,2,3,5,5,1,2,1,3,4,4,4,"Scenario B"  
387,1,2,3,3,1,4,3,2,1,1,1,2,1,4,"Scenario A"  
387,1,1,2,1,4,5,5,2,2,1,2,3,4,1,"Scenario A"  
387,2,1,2,3,1,1,3,1,2,2,1,2,3,1,"Scenario B"  
387,1,2,1,2,1,3,4,2,1,3,3,3,5,1,"Scenario A"  
387,2,2,3,2,1,1,5,1,1,2,3,4,2,2,"Scenario A"  
387,2,2,3,1,2,4,2,1,1,1,2,2,2,5,"Scenario A"  
387,2,2,1,1,3,3,4,1,1,2,3,1,3,5,"Scenario B"  
426,1,1,3,3,3,1,2,1,2,2,3,2,2,5,"Scenario A"  
426,1,2,3,2,1,1,4,2,1,2,3,4,5,3,"Scenario A"  
426,2,2,1,2,3,4,2,1,1,3,1,1,4,5,"Scenario A"  
426,1,2,1,1,3,2,1,2,1,1,2,4,3,1,"Scenario B"  
426,1,2,2,2,2,3,2,2,2,3,1,4,5,1,"Scenario B"  
426,2,1,2,1,2,1,4,1,1,1,3,2,5,2,"Scenario A"  
426,2,1,1,3,1,2,1,1,2,3,2,4,3,4,"Scenario A"  
426,1,1,3,3,1,5,2,2,2,2,1,3,1,3,"Scenario B"  
426,1,1,2,2,3,3,3,2,2,3,1,2,4,5,"Scenario A"  
426,1,2,2,3,1,5,4,2,1,3,2,4,2,5,"Scenario A"  
434,2,1,2,2,3,2,1,1,2,3,2,1,5,4,"Scenario A"  
434,1,2,2,3,2,1,5,2,1,1,1,4,3,3,"Scenario A"  
434,2,2,1,1,2,4,5,1,2,2,2,3,1,1,"Scenario A"  
434,1,1,3,3,1,4,1,2,2,1,2,4,3,2,"Scenario A"  
434,2,1,2,1,4,2,3,1,1,3,3,1,5,3,"Scenario B"  
434,2,2,3,1,1,1,1,1,1,1,3,3,3,4,"Scenario A"  
434,1,2,1,2,3,2,4,2,1,2,2,2,5,3,"Scenario A"  
434,2,2,3,3,4,3,5,2,1,2,1,3,5,2,"Scenario B"  
434,1,2,1,1,2,4,5,2,1,3,3,4,2,4,"Scenario A"  
434,1,1,2,2,2,1,1,2,2,3,1,1,1,2,"Scenario A"  
425,1,2,2,2,4,3,2,1,1,1,3,3,4,3,"Scenario A"  
425,2,1,3,1,2,5,4,1,2,1,3,4,2,1,"Scenario A"  
425,1,1,1,3,1,4,5,2,2,2,2,2,3,5,"Scenario B"  
425,2,1,2,2,1,4,1,1,2,2,1,3,1,2,"Scenario B"  
425,1,1,3,2,2,2,3,2,2,3,3,1,2,4,"Scenario A"  
425,2,1,1,1,4,1,2,1,2,3,2,2,5,3,"Scenario A"  
425,2,1,1,2,1,4,4,1,2,3,1,3,3,5,"Scenario A"  
425,2,2,2,3,3,5,4,1,2,2,3,4,4,1,"Scenario B"  
425,1,1,2,1,4,3,5,2,1,1,2,3,5,1,"Scenario B"  
425,1,1,3,1,1,1,2,2,2,3,3,2,4,1,"Scenario A"  
180,2,1,2,3,1,3,1,1,2,1,1,1,2,2,"Scenario A"  
180,1,1,2,1,2,2,3,2,2,3,2,4,1,2,"Scenario A"  
180,2,1,3,2,3,5,5,1,2,1,3,4,4,4,"Scenario A"  
180,1,2,3,3,1,4,3,2,1,1,1,2,1,4,"Scenario A"  
180,1,1,2,1,4,5,5,2,2,1,2,3,4,1,"Scenario B"  
180,2,1,2,3,1,1,3,1,2,2,1,2,3,1,"Scenario A"  
180,1,2,1,2,1,3,4,2,1,3,3,3,5,1,"Scenario A"  
180,2,2,3,2,1,1,5,1,1,2,3,4,2,2,"Scenario B"  
180,2,2,3,1,2,4,2,1,1,1,2,2,2,5,"Scenario A"  
180,2,2,1,1,3,3,4,1,1,2,3,1,3,5,"Scenario A"  
90,1,1,3,3,3,1,2,1,2,2,3,2,2,5,"Scenario B"  
90,1,2,3,2,1,1,4,2,1,2,3,4,5,3,"Scenario A"  
90,2,2,1,2,3,4,2,1,1,3,1,1,4,5,"Scenario B"  
90,1,2,1,1,3,2,1,2,1,1,2,4,3,1,"Scenario A"  
90,1,2,2,2,2,3,2,2,2,3,1,4,5,1,"Scenario A"  
90,2,1,2,1,2,1,4,1,1,1,3,2,5,2,"Scenario A"  
90,2,1,1,3,1,2,1,1,2,3,2,4,3,4,"Scenario A"  
90,1,1,3,3,1,5,2,2,2,2,1,3,1,3,"Scenario A"  
90,1,1,2,2,3,3,3,2,2,3,1,2,4,5,"Scenario B"

90,1,2,2,3,1,5,4,2,1,3,2,4,2,5,"Scenario A"  
91,2,1,2,2,3,2,1,1,2,3,2,1,5,4,"Scenario A"  
91,1,2,2,3,2,1,5,2,1,1,1,4,3,3,"Scenario B"  
91,2,2,1,1,2,4,5,1,2,2,2,3,1,1,"Scenario B"  
91,1,1,3,3,1,4,1,2,2,1,2,4,3,2,"Scenario B"  
91,2,1,2,1,4,2,3,1,1,3,3,1,5,3,"Scenario A"  
91,2,2,3,1,1,1,1,1,1,1,3,3,3,4,"Scenario A"  
91,1,2,1,2,3,2,4,2,1,2,2,2,5,3,"Scenario B"  
91,2,2,3,3,4,3,5,2,1,2,1,3,5,2,"Scenario A"  
91,1,2,1,1,2,4,5,2,1,3,3,4,2,4,"Scenario B"  
91,1,1,2,2,2,1,1,2,2,3,1,1,1,2,"Scenario B"  
92,1,2,2,2,4,3,2,1,1,1,3,3,4,3,"Scenario A"  
92,2,1,3,1,2,5,4,1,2,1,3,4,2,1,"Scenario B"  
92,1,1,1,3,1,4,5,2,2,2,2,2,3,5,"Scenario B"  
92,2,1,2,2,1,4,1,1,2,2,1,3,1,2,"Scenario A"  
92,1,1,3,2,2,2,3,2,2,3,3,1,2,4,"Scenario B"  
92,2,1,1,1,4,1,2,1,2,3,2,2,5,3,"Scenario A"  
92,2,1,1,2,1,4,4,1,2,3,1,3,3,5,"Scenario A"  
92,2,2,2,3,3,5,4,1,2,2,3,4,4,1,"Scenario B"  
92,1,1,2,1,4,3,5,2,1,1,2,3,5,1,"Scenario B"  
92,1,1,3,1,1,1,2,2,2,3,3,2,4,1,"Scenario B"  
93,2,1,2,3,1,3,1,1,2,1,1,1,2,2,"Scenario A"  
93,1,1,2,1,2,2,3,2,2,3,2,4,1,2,"Scenario B"  
93,2,1,3,2,3,5,5,1,2,1,3,4,4,4,"Scenario A"  
93,1,2,3,3,1,4,3,2,1,1,1,2,1,4,"Scenario B"  
93,1,1,2,1,4,5,5,2,2,1,2,3,4,1,"Scenario B"  
93,2,1,2,3,1,1,3,1,2,2,1,2,3,1,"Scenario A"  
93,1,2,1,2,1,3,4,2,1,3,3,3,5,1,"Scenario B"  
93,2,2,3,2,1,1,5,1,1,2,3,4,2,2,"Scenario A"  
93,2,2,3,1,2,4,2,1,1,1,2,2,2,5,"Scenario A"  
93,2,2,1,1,3,3,4,1,1,2,3,1,3,5,"Scenario A"  
94,1,1,3,3,3,1,2,1,2,2,3,2,2,5,"Scenario B"  
94,1,2,3,2,1,1,4,2,1,2,3,4,5,3,"Scenario A"  
94,2,2,1,2,3,4,2,1,1,3,1,1,4,5,"Scenario B"  
94,1,2,1,1,3,2,1,2,1,1,2,4,3,1,"Scenario A"  
94,1,2,2,2,2,3,2,2,2,3,1,4,5,1,"Scenario A"  
94,2,1,2,1,2,1,4,1,1,1,3,2,5,2,"Scenario A"  
94,2,1,1,3,1,2,1,1,2,3,2,4,3,4,"Scenario A"  
94,1,1,3,3,1,5,2,2,2,2,1,3,1,3,"Scenario A"  
94,1,1,2,2,3,3,3,2,2,3,1,2,4,5,"Scenario B"  
94,1,2,2,3,1,5,4,2,1,3,2,4,2,5,"Scenario A"
