# Supplementary material for: Public preferences for interventions to prevent emerging infectious disease threats: a discrete choice experiment
Source: PubMed Central journal article supplement — BMJ Open. 2018 Feb 16;8(2):e017355. doi: 10.1136/bmjopen-2017-017355 (PMC5857709; doi:10.1136/bmjopen-2017-017355), 2018-02-16
Supplement: bmjopen-2017-017355supp003.pdf [file bmjopen-2017-017355supp003.pdf]

**Title: Public preferences for interventions to prevent emerging infectious disease threats: a discrete choice experiment - supplementary material**

**Authors (family names underlined):**

Alex R Cook\*, PhD<sup>1,2,3,4</sup>, Xiahong Zhao, BSc<sup>1</sup>, Mark IC Chen MBBS, MPH, PhD<sup>1,3</sup>, Eric A Finkelstein, PhD, MHA<sup>1,2</sup>

<sup>1</sup>Saw Swee Hock School of Public Health, National University of Singapore and National University Health System, Singapore, Singapore

<sup>2</sup>Program in Health Services and Systems Research, Duke-NUS Graduate Medical School Singapore, Singapore, Singapore

<sup>3</sup>Communicable Disease Centre, Tan Tock Seng Hospital, Singapore, Singapore

<sup>4</sup>Department of Statistics and Applied Probability, National University of Singapore, Singapore, Singapore

**Author for correspondence:**

Dr Alex R Cook; alex.richard.cook@gmail.com; +65 83 69 60 91

Saw Swee Hock School of Public Health, National University of Singapore, MD1, 12 Science Drive 2, Singapore 117549

Alternative if Cook unavailable: Prof Eric Finkelstein; eric.finkelstein@duke-nus.edu.sg

**Table S1: Utility estimates under main model, all participants. 95% CrI is the 95% equal-tailed credible interval. The utility for all unlisted levels are set to 0. For the all-participant, the utility for 180 deaths is anchored to –1. For mortality-averse and expenditure-averse results, 95% CI is the 95% equal-tailed confidence interval for the posterior mean utility.**

| Attribute level                                          | Posterior mean | 95% CrI       | Attribute level      | Posterior mean | 95% CrI        |
|----------------------------------------------------------|----------------|---------------|----------------------|----------------|----------------|
| <b>All participants</b>                                  |                |               |                      |                |                |
| Mandatory quarantine                                     | 0.15           | (0.09,0.22)   | 500 infections       | -0.08          | (-0.22,0.06)   |
| Mandatory isolation                                      | 0.08           | (0.01,0.15)   | 1 000 infections     | 0.15           | (0.02,0.28)    |
| School closure                                           | 0.27           | (0.16,0.39)   | 10 000 infections    | 0.05           | (-0.10,0.20)   |
| School closure and cancellation of other mass gatherings | 0.31           | (0.21,0.41)   | 1 million infections | -0.06          | (-0.18,0.07)   |
| Screening at border                                      | 0.12           | (0.02,0.22)   | 30 deaths            | -0.35          | (-0.45,-0.24)  |
| Screening at border and other sites                      | 0.21           | (0.12,0.32)   | 80 deaths            | -0.71          | (-0.84,-0.58)  |
| Tax, per S\$100                                          | -0.84          | (-1.16,-0.54) | 120 deaths           | -0.72          | (-0.83,-0.62)  |
| Standard deviation                                       | 1.26           | (0.95,1.68)   | 180 deaths           | -1.00          | (-1.00,-1.00)  |
| <b>Mortality averse</b>                                  |                |               |                      |                |                |
| Attribute level                                          | Posterior mean | 95% CI        | Attribute level      | Posterior mean | 95% CI         |
| Mandatory quarantine                                     | 0.14           | (0.11, 0.17)  | 500 infections       | -0.04          | (-0.06, -0.03) |
| Mandatory isolation                                      | 0.06           | (0.01, 0.11)  | 1 000 infections     | 0.05           | (0.04, 0.07)   |
| School closure                                           | 0.30           | (0.29, 0.32)  | 10 000 infections    | 0.05           | (0.02, 0.08)   |
| School closure and cancellation of other mass gatherings | 0.41           | (0.38, 0.44)  | 1 million infections | -0.01          | (-0.06, 0.04)  |
| Screening at border                                      | 0.24           | (0.21, 0.27)  | 30 deaths            | -0.38          | (-0.40,-0.36)  |
| Screening at border and other sites                      | 0.22           | (0.21, 0.24)  | 80 deaths            | -0.64          | (-0.66,-0.61)  |
| Tax, per S\$100                                          | -0.41          | (-0.73,0.10)  | 120 deaths           | -0.82          | (-0.87,-0.77)  |
|                                                          |                |               | 180 deaths           | -1.68          | (-1.75,-1.62)  |
| <b>Expenditure averse</b>                                |                |               |                      |                |                |
| Mandatory quarantine                                     | 0.13           | (0.07, 0.18)  | 500 infections       | -0.08          | (-0.11, -0.06) |
| Mandatory isolation                                      | 0.02           | (-0.04,-0.09) | 1 000 infections     | 0.10           | (0.08, 0.13)   |
| School closure                                           | 0.30           | (0.27, 0.32)  | 10 000 infections    | 0.07           | (0.02, 0.11)   |
| School closure and cancellation of other mass gatherings | 0.40           | (0.35, 0.44)  | 1 million infections | -0.14          | (-0.22, -0.07) |
| Screening at border                                      | 0.10           | (0.06, 0.15)  | 30 deaths            | -0.38          | (-0.41, -0.35) |
| Screening at border and other sites                      | 0.19           | (0.17, 0.22)  | 80 deaths            | -0.64          | (-0.67, -0.60) |
| Tax, per S\$100                                          | -1.29          | (-1.72, 0.87) | 120 deaths           | -0.54          | (-0.62, -0.46) |
|                                                          |                |               | 180 deaths           | -0.28          | (-0.35, -0.20) |

Table S2: Utility estimates under variant model, all participants and subgroups. 95% CrI is the 95% equal-tailed credible interval. The utility for all unlisted levels are set to 0. For the all-participant, the utility for 180 deaths is anchored to -1.

| Attribute level                                          | Posterior mean | 95% CrI       | Attribute level      | Posterior mean | 95% CrI       |
|----------------------------------------------------------|----------------|---------------|----------------------|----------------|---------------|
| <b>All participants</b>                                  |                |               |                      |                |               |
| Mandatory quarantine                                     | 0.16           | (0.09,0.24)   | 500 infections       | -0.05          | (-0.19,0.10)  |
| Mandatory isolation                                      | 0.10           | (0.03,0.17)   | 1 000 infections     | 0.19           | (0.04,0.35)   |
| School closure                                           | 0.32           | (0.19,0.47)   | 10 000 infections    | 0.12           | (-0.05,0.33)  |
| School closure and cancellation of other mass gatherings | 0.29           | (0.18,0.41)   | 1 million infections | 0.02           | (-0.12,0.18)  |
| Screening at border                                      | 0.14           | (0.04,0.25)   | 30 deaths            | -0.38          | (-0.49,-0.26) |
| Screening at border and other sites                      | 0.18           | (0.07,0.29)   | 80 deaths            | -0.75          | (-0.92,-0.60) |
| S\$20 tax                                                | -0.22          | (-0.39,-0.08) | 120 deaths           | -0.76          | (-0.88,-0.65) |
| S\$30 tax                                                | -0.28          | (-0.39,-0.17) | 180 deaths           | -1.00          | (-1.00,-1.00) |
| S\$50 tax                                                | -0.34          | (-0.47,-0.21) | Standard deviation   | 1.38           | (1.00,1.93)   |
